# Supplementary material
Source: Research Square preprint supplement (doi:10.21203/rs.3.rs-9449451/v1)
Supplement: Supplementary file 1 [file 23446f328c21dd6a16edba6a.docx]

| **(A)** | | | | | | | | | | |
| --- | --- | --- | --- | --- | --- | --- | --- | --- | --- | --- |
| **Leading trait** | **Rank of leading trait in ANOVA** | **Type of annotated trait (protein-coding genes (CDS); small proteins (sORF))** | **UniRef100** | **UniRef90** | **Protein name (bakta)** | **Protein name (UniProt)** | **Model** | **Association** | **Trait associated in-hospital mortality rate (95% CI)** | **Abundance of leading trait** |
| UniRef100_A0A6C0L8I7 | 3 | cds | UniRef100_A0A6C0L8I7 | UniRef90_A0A6C0L8I7 | (pseudo) hypothetical protein | Uncharacterized protein | A | increased in-hospital mortality | 60.6% (42.1;77.1) | 5.1% |
| UniRef100_Q93PN3 | 4 | cds | UniRef100_Q93PN3 | UniRef90_Q93PN3 | ABC transporter substrate-binding protein | ABC transporter substrate-binding protein (fhuD1) | A | increased in-hospital mortality | 28.4% (23.3;33.9) | 46.0% |
| UniRef100_Q99VY2 | 5 | cds | UniRef100_Q99VY2 | UniRef90_Q99VY2 | ABC-type Mn2+/Zn2+ transport system, ATPase component | ABC superfamily ATP binding cassette transporter, ABC protein (mntA) | A | decreased in-hospital mortality | 22.8% (19.4;26.6) | 84.4% |
| UniRef100_UPI0013C5277B | 6 | cds | UniRef100_UPI0013C5277B | UniRef90_Q7A883 | Uncharacterized lipoprotein SAV0100 | Lipoprotein | A | decreased in-hospital mortality | 7.9% (1.7;21.4) | 5.9% |
| UniRef100_A7X1P3 | 7 | cds | UniRef100_A7X1P3 | UniRef90_Q5HGG8 | proline--tRNA ligase | proline--tRNA ligase (proS) | A | increased in-hospital mortality | 31.3% (21.6;42.4) | 12.9% |
| UniRef100_A0A1D4BGR3 | 8 | cds | UniRef100_A0A1D4BGR3 | UniRef90_T1Y5M5 | Transcriptional regulator, TetR family protein | Transcriptional regulator | A | decreased in-hospital mortality | 20.3% (15.2;26.1) | 35.3% |
| UniRef100_A0A658X0A3 | 10 | cds | UniRef100_A0A658X0A3 | UniRef90_A0A380EDU5 | Helix-turn-helix family protein | Helix-turn-helix transcriptional regulator | A | increased in-hospital mortality | 37.1% (21.5;55.1) | 5.4% |
| UniRef100_A0A0E0VRF1 | 11 | cds | UniRef100_A0A0E0VRF1 | UniRef90_Q2FXQ9 | glutamyl-tRNA reductase | Glutamyl-tRNA reductase | A | decreased in-hospital mortality | 10.3% (2.9;24.2) | 6.1% |
| UniRef100_A0A0U1MPD4 | 12 | cds | UniRef100_A0A0U1MPD4 | UniRef90_A0A0E1X6B0 | Uncharacterized NAD(P)/FAD-binding protein YdhS | Pyridine nucleotide-disulfide oxidoreductase | A | decreased in-hospital mortality | 14.8% (7.9;24.4) | 12.6% |
| UniRef100_A0A0E0VLV9 | 13 | cds | UniRef100_A0A0E0VLV9 | UniRef90_A0A2K4AEJ9 | Serine transporter YbeC, amino acid:H+ symporter family | Amino acid-polyamine-organocation superfamily | A | decreased in-hospital mortality | 16.7% (11.4;23.2) | 26.1% |

| **(B)** | | | | | | | | | | |
| --- | --- | --- | --- | --- | --- | --- | --- | --- | --- | --- |
| **Leading trait** | **Rank of leading trait in ANOVA** | **Type of annotated trait (protein-coding genes (CDS); small proteins (sORF))** | **Number of UniRef100 summerized in UniRef90** | **UniRef90** | **Protein name (bakta)** | **Protein name (UniProt)** | **Model** | **Association** | **Trait associated in-hospital mortality rate (95% CI)** | **Abundance of leading trait** |
| UniRef90_A0A6C0L8I7 | 3 | cds | 1 | UniRef90_A0A6C0L8I7 | (pseudo) hypothetical protein | Uncharacterized protein | B | increased in-hospital mortality | 60.6% (42.1;77.1) | 5.1% |
| UniRef90_UPI0007C9FD14 | 4 | cds | 0 | UniRef90_UPI0007C9FD14 | hyperosmolarity resistance protein Ebh | hyperosmolarity resistance protein Ebh | B | increased in-hospital mortality | 36.7% (23.4;51.7) | 7.6% |
| UniRef90_A0A0H2WXP4 | 5 | cds | 7 | UniRef90_A0A0H2WXP4 | Cytosolic protein | Cytosolic protein | B | increased in-hospital mortality | 26.8% (22.8;31.1) | 72.0% |
| UniRef90_UPI001159574B | 6 | cds | 0 | UniRef90_UPI001159574B | TIGR01741 family protein | TIGR01741 family protein | B | increased in-hospital mortality | 35% (20.6;51.7) | 6.2% |
| UniRef90_A0A7U7AW69 | 8 | cds | 1 | UniRef90_A0A7U7AW69 | Transposase | Transposase | B | decreased in-hospital mortality | 3.3% (0.1;17.2) | 4.7% |
| UniRef90_A0A0U1MRA0 | 9 | cds | 3 | UniRef90_A0A0U1MRA0 | DUF961 domain-containing protein | DUF961 domain-containing protein | B | increased in-hospital mortality | 29.8% (23.5;36.9) | 29.7% |
| UniRef90_A0A133QB87 | 9 | cds | 5 | UniRef90_A0A133QB87 | Transposon-related protein | Transposon-related protein | B | increased in-hospital mortality | 29.8% (23.5;36.9) | 29.5% |
| UniRef90_A0A6K4ARI6 | 10 | cds | 0 | UniRef90_A0A6K4ARI6 | Conserved virulence factor C | Conserved virulence factor C | B | increased in-hospital mortality | 35.4% (23.9;48.2) | 10.1% |
| UniRef90_O80069 | 11 | cds | 14 | UniRef90_O80069 | ATPase | ATPase | B | increased in-hospital mortality | 29.3% (23.1;36.2) | 30.8% |
| UniRef90_S4V7K0 | 12 | cds | 44 | UniRef90_S4V7K0 | DUF1024 domain-containing protein | DUF1024 domain-containing protein | B | increased in-hospital mortality | 33.1% (25.3;41.7) | 21.2% |

| **(C)** | | | | | | | | | | |
| --- | --- | --- | --- | --- | --- | --- | --- | --- | --- | --- |
| **Leading trait** | **Rank of leading trait in ANOVA** | **Type of annotated trait (protein-coding genes (CDS); small proteins (sORF))** | **UniRef100** | **UniRef90** | **Protein name (bakta)** | **Protein name (UniProt)** | **Model** | **Association** | **Trait associated in-hospital mortality rate (95% CI)** | **Abundance of leading trait** |
| UniRef100_A0A6C0L8I7 and UniRef90_A0A6C0L8I7 | 3 | cds | UniRef100_A0A6C0L8I7 | UniRef90_A0A6C0L8I7 | (pseudo) hypothetical protein | Uncharacterized protein | A; B | increased in-hospital mortality | 60.6% (42.1;77.1) | 5.1% |
| UniRef100_A0A658X0A3 and UniRef90_A0A380EDU5 | 10; 32 | cds | UniRef100_A0A658X0A3 | UniRef90_A0A380EDU5 | Helix-turn-helix family protein | Helix-turn-helix transcriptional regulator | A; B | increased in-hospital mortality | 37.1% (21.5;55.1) | 5.4% and 5.6% |
| UniRef100_B6V395 and UniRef90_A0A0U1MRA0 | 14;9 | cds | UniRef100_B6V395 | UniRef90_A0A0U1MRA0 | DUF961 domain-containing protein | DUF961 domain-containing protein | A; B | increased in-hospital mortality | 36% (28;44.7) | 21.2% and 29.7% |
| UniRef100_D2J5X0 and UniRef90_Q76LS8 | 17;19 | cds | UniRef100_D2J5X0 | UniRef90_Q76LS8 | staphylococcal enterotoxin type R | Exotoxin (entG) | A; B | increased in-hospital mortality | 44.4% (27.9;61.9) | 5.6% and 5.9% |
| UniRef100_D2J5X2 and UniRef90_A0A1W5ISY9 | 37; 18 | cds | UniRef100_D2J5X2 | UniRef90_A0A1W5ISY9 | DNA-binding transcriptional regulator, MarR family | Transcriptional regulator, MarR family (ohrR) | A; B | increased in-hospital mortality | 42.5% (27;59.1) | 6.2% and 11.2% |
| UniRef100_A0A9Q8H2H2 and UniRef90_A0A9Q8H2H2 | 40; 13 | sorf | UniRef100_A0A9Q8H2H2 | UniRef90_A0A9Q8H2H2 | Secreted protein | Uncharacterized protein | A; B | increased in-hospital mortality | 28.2% (23.3;33.6) | 47.9% |
| UniRef100_D2J5W1 and UniRef90_A0A1D0BP50 | 53; 24 | cds | UniRef100_D2J5W1 | UniRef90_A0A1D0BP50 | Phage protein | Uncharacterized protein | A; B | increased in-hospital mortality | 45.5% (28.1;63.6) | 5.1% and 5.8% |
| UniRef100_O85217 and UniRef90_Q76LS7 | 67;19 | cds | UniRef100_O85217 | UniRef90_Q76LS7 | staphylococcal enterotoxin type J | Enterotoxin J (sej) | A; B | increased in-hospital mortality | 43.2% (27.1;60.5) | 5.8% |
| UniRef100_D2J5W8 and UniRef90_D2J5W8 | 67;24 | cds | UniRef100_D2J5W8 | UniRef90_D2J5W8 | hypothetical protein | Uncharacterized protein | A; B | increased in-hospital mortality | 5.8% |
| UniRef100_D2J5Z4 and UniRef90_D2J5Z4 | 67;24 | cds | UniRef100_D2J5Z4 | UniRef90_D2J5Z4 | Replication protein | Rep | A; B | increased in-hospital mortality | 5.8% and 5.9% |
| UniRef100_A0A2R4A9A6 and UniRef90_D2J9Q1 | 69; 34 | cds | UniRef100_A0A2R4A9A6 | UniRef90_D2J9Q1 | Replication protein | Conserved domain-containing protein | A; B | increased in-hospital mortality | 35.6% (24.7;47.7) | 11.4% |

**Table 1: (A)** Top 10 UniRef100 traits in Model A. **(B)** Top 10 UniRef90 traits in Model B. **(C)** Common traits in Model A and B. Each trait is displayed with its association with mortality (pink = increased in-hospital mortality; green = decreased in-hospital mortality), the trait associated in-hospital mortality rate and abundance. Clinical factors, including their ranks, are not shown. Abundances below 5% are explained by calculating gene frequencies in training and validation cohort combined.
