# Supplementary material
Source: Research Square preprint supplement (doi:10.21203/rs.3.rs-9449451/v1)
Supplement: Supplementary file 2 [file 24c389adfed4f4c8a07f0a5c.xlsx]

## Sheet: clinical_metadata
studiso_id_mb_extended	centre	gebj_mb	age_aufstat	aufstat_k_mb	entnahm_d1_mb	entl_d_ent	sex_mb	Source	TrainingData	err1_gram_pos_mb2	MRSA_harmonized	focus_harmonized	nos_amb_mb	agr_group	Verstorben	BMI	k_gewicht1_t3	k_gre1_t3	herzinf_t0	herzinsuff_t0	peri_ater_verschl_t0	demenz_t0	cerebrovas_erk_t0	chron_lungerk_t0	kollagenose_t0	gdulkuskrankheit_t0	lei_lebererk_t0	msch_sch_lebererk_t0	dmohne_endorgan_t0	dm_endorgansch_t0	msch_sch_nierenerk_t0	halbseitenl_t0	tumorerkr_t0	metast_sol_tumor_t0	leukaemie_t0	lymphom_t0	hiv_aids_t0	hiv_t0	ced_t0	CCI_age_score	CCI	pbs_hypo_t0	pbs_mbea_t0	pbs_hks_t0	pbs_mz_t0	pbs_temperature	pbs_t0	ab_1_abt	ab_1_verab_abt
H1-17-0271-1	Hospital 1	1954	63	2017-06-26	2017-06-26	2017-08-25	male	BLOOMY	Validation cohort	Staphylococcus aureus	no	cardiovascular; intravasale foreign body	community acquired	gp1	survived	27.7008	100	190	no	no	no	no	no	no	no	yes	yes	no	yes	no	no	no	yes	no	no	NA	no	no	no	2	7	no	no	no	alert	35,1-36,0øC or 39,0-39,9øC	1	Ceftriaxon	IV (parenteral)
H1-17-0272-1	Hospital 1	1930	87	2017-06-19	2017-06-24	2017-07-18	male	BLOOMY	Training cohort	Staphylococcus aureus	no	cardiovascular	hospital acquired	gp1	survived	unknown	80	NA	no	no	no	no	yes	no	no	no	no	no	yes	no	no	no	no	no	no	no	no	NA	no	4	6	no	yes	no	alert	36,1-38,9øC	2	Ampicillin+Sulbactam	IV (parenteral)
H1-17-0297-1	Hospital 1	1943	74	2017-07-10	2017-07-10	2017-08-11	male	BLOOMY	Training cohort	Staphylococcus aureus	no	cardiovascular; intravasale foreign body	community acquired	gp1	diseased	unknown	NA	182	no	no	no	no	no	no	no	no	no	no	no	no	no	no	yes	yes	no	no	no	no	no	3	11	yes	no	no	alert	36,1-38,9øC	2	Piperacillin+Tazobactam	IV (parenteral)
H1-17-0308-1	Hospital 1	1959	58	2017-05-11	NA	2017-09-22	male	BLOOMY	Training cohort	Staphylococcus aureus	no	cardiovascular; intravasale foreign body	hospital acquired	gp1	survived	20.9877	68	180	no	no	no	no	no	no	no	no	yes	no	yes	no	no	no	yes	no	no	yes	no	no	no	1	7	no	no	no	disoriented	36,1-38,9øC	1	Vancomycin	IV (parenteral)
H1-17-0334-1	Hospital 1	1963	54	2017-07-07	2017-07-19	2017-08-02	female	BLOOMY	Training cohort	Staphylococcus aureus	no	cardiovascular; intravasale foreign body	hospital acquired	gp1	survived	22.8374	66	170	no	no	no	no	yes	no	no	no	no	no	no	no	no	no	no	no	no	no	no	no	no	1	2	no	no	no	alert	36,1-38,9øC	0	Ampicillin+Sulbactam	IV (parenteral)
H1-17-0372-1	Hospital 1	1936	81	2017-07-30	NA	2017-08-16	female	BLOOMY	Training cohort	Staphylococcus aureus	no	cardiovascular	hospital acquired	gp2	survived	unknown	NA	NA	no	no	no	no	no	no	no	no	no	no	no	no	no	no	no	no	NA	NA	no	NA	no	4	4	unknown	no	no	alert	35,1-36,0øC or 39,0-39,9øC	1	Ciprofloxacin	oral
H1-17-0387-1	Hospital 1	1936	81	2017-08-02	NA	2017-09-02	female	BLOOMY	Training cohort	Staphylococcus aureus	no	cardiovascular	hospital acquired	gp1	survived	19.9481	53	163	no	no	no	no	no	no	no	no	no	no	no	no	no	no	yes	yes	no	no	no	no	no	4	12	no	no	no	alert	35,1-36,0øC or 39,0-39,9øC	1	Piperacillin+Tazobactam	IV (parenteral)
H1-17-0400-1	Hospital 1	1970	47	2017-07-25	2017-08-21	2017-08-29	female	BLOOMY	Training cohort	Staphylococcus aureus	no	cardiovascular; intravasale foreign body	hospital acquired	gp1	survived	40.5178	113	167	no	yes	no	no	no	yes	no	no	no	no	yes	no	yes	no	no	no	no	no	no	no	no	1	6	no	no	no	alert	36,1-38,9øC	0	Ampicillin+Sulbactam	IV (parenteral)
H1-17-0402-1	Hospital 1	1935	82	2017-08-15	2017-08-14	2017-08-30	male	BLOOMY	Validation cohort	Staphylococcus aureus	no	skin and soft tissue	community acquired	gp2	diseased	unknown	NA	NA	yes	yes	yes	no	no	no	no	no	no	no	no	no	yes	no	no	no	no	no	no	no	no	4	9	no	no	no	alert	36,1-38,9øC	0	Piperacillin+Tazobactam	IV (parenteral)
H1-17-0406-1	Hospital 1	1953	64	2017-08-09	2017-08-16	2017-09-16	female	BLOOMY	Training cohort	Staphylococcus aureus	no	skin and soft tissue	hospital acquired	gp2	survived	31.2452	82	162	no	no	no	no	no	yes	no	no	no	yes	yes	no	yes	no	no	no	NA	NA	no	no	no	2	9	no	no	no	alert	36,1-38,9øC	0	other antibiotic substance	IV (parenteral)
H1-17-0445-1	Hospital 1	1966	51	2017-08-16	2017-08-26	2017-09-12	male	BLOOMY	Training cohort	Staphylococcus aureus	no	cardiovascular; intravasale foreign body	hospital acquired	gp1	survived	unknown	65	NA	no	yes	no	no	no	no	yes	no	no	yes	no	no	yes	no	no	no	NA	NA	no	no	no	1	8	yes	no	no	alert	35,1-36,0øC or 39,0-39,9øC	3	Piperacillin+Tazobactam	IV (parenteral)
H1-17-0463-1	Hospital 1	1948	69	2017-08-30	2017-09-04	2017-09-18	male	BLOOMY	Training cohort	Staphylococcus aureus	no	cardiovascular	hospital acquired	gp1	survived	19.7531	64	180	no	yes	no	no	no	no	no	yes	no	no	yes	no	no	no	yes	no	yes	no	no	no	no	2	9	no	no	no	alert	36,1-38,9øC	0	Piperacillin+Tazobactam	IV (parenteral)
H1-17-0470-1	Hospital 1	1941	76	2017-09-07	2017-09-08	2017-10-27	female	BLOOMY	Validation cohort	Staphylococcus aureus	no	skin and soft tissue	community acquired	gp1	diseased	28.125	72	160	no	yes	no	no	no	no	no	no	no	no	no	no	no	yes	no	no	no	no	no	no	no	3	6	no	yes	no	comatose	36,1-38,9øC	6	Flucloxacillin	IV (parenteral)
H1-17-0477-1	Hospital 1	1990	27	2017-09-07	2017-09-18	2017-10-12	male	BLOOMY	Training cohort	Staphylococcus aureus	no	skin and soft tissue	hospital acquired	gp1	survived	32.1929	102	178	no	no	no	no	no	no	no	no	no	no	no	no	no	no	yes	no	yes	no	no	no	yes	1	5	no	no	no	alert	35,1-36,0øC or 39,0-39,9øC	1	Piperacillin+Tazobactam	IV (parenteral)
H1-17-0478-1	Hospital 1	1960	57	2017-09-17	2017-09-18	2017-10-13	male	BLOOMY	Training cohort	Staphylococcus aureus	no	cardiovascular	community acquired	gp1	survived	unknown	81	NA	no	yes	yes	no	no	yes	no	no	no	no	no	no	yes	no	no	no	no	no	no	no	no	1	6	no	no	no	alert	36,1-38,9øC	0	Clarithromycin	oral
H1-17-0486-1	Hospital 1	1946	71	2017-09-08	2017-09-22	2017-10-02	female	BLOOMY	Validation cohort	Staphylococcus aureus	no	abdominal; foreign body	hospital acquired	gp3	survived	25	64	160	no	no	no	no	no	no	no	no	no	yes	no	no	no	no	yes	no	NA	NA	no	no	no	3	8	no	no	no	alert	35,1-36,0øC or 39,0-39,9øC	1	Piperacillin+Tazobactam	IV (parenteral)
H1-17-0487-1	Hospital 1	1951	66	2017-09-19	2017-09-19	2017-10-20	female	BLOOMY	Validation cohort	Staphylococcus aureus	no	bone and joint	community acquired	gp2	survived	35.4172	106	173	no	no	no	no	no	no	no	no	no	no	no	no	no	no	no	no	NA	NA	no	no	no	2	2	no	no	no	alert	36,1-38,9øC	0	Ampicillin	IV (parenteral)
H1-17-0501-1	Hospital 1	1971	46	2017-09-19	2017-09-27	2017-10-30	male	BLOOMY	Validation cohort	Staphylococcus aureus	no	cardiovascular; intravasale foreign body	hospital acquired	gp1	survived	22.0968	74	183	no	no	no	no	no	yes	no	no	no	no	no	no	no	no	yes	no	no	yes	no	no	no	1	6	no	no	no	stuporous	36,1-38,9øC	2	Meropenem	IV (parenteral)
H1-17-0502-1	Hospital 1	1955	62	2017-09-22	2017-09-29	2017-10-17	female	BLOOMY	Training cohort	Staphylococcus aureus	no	cardiovascular; intravasale foreign body	hospital acquired	gp1	survived	39.9146	114	169	no	no	no	no	no	no	no	no	no	no	yes	no	no	no	yes	no	NA	NA	no	no	no	2	5	unknown	no	no	alert	36,1-38,9øC	0	Flucloxacillin	IV (parenteral)
H1-17-0621-1	Hospital 1	1973	44	2017-12-11	2017-12-12	2018-01-11	male	BLOOMY	Training cohort	Staphylococcus aureus	no	cardiovascular	community acquired	gp1	survived	23.5457	85	190	no	no	no	no	no	no	no	no	no	no	no	no	no	no	yes	yes	no	no	no	no	yes	1	9	no	no	no	alert	36,1-38,9øC	0	Amoxicillin	oral
H1-17-0647-1	Hospital 1	1998	19	2017-12-21	2017-12-30	2018-01-21	male	BLOOMY	Validation cohort	Staphylococcus aureus	no	no focus identified	hospital acquired	gp1	survived	27.4717	90	181	no	no	no	no	no	no	no	no	no	no	no	no	no	no	yes	no	yes	no	no	no	no	1	5	no	no	no	alert	36,1-38,9øC	0	Meropenem	IV (parenteral)
H1-18-0014-1	Hospital 1	1989	29	2018-01-09	2018-01-09	2018-04-06	female	BLOOMY	Training cohort	Staphylococcus aureus	no	cardiovascular; intravasale foreign body	community acquired	gp1	diseased	24.2188	62	160	no	no	no	no	no	no	no	no	no	no	no	no	no	no	yes	no	no	yes	no	no	no	1	5	no	no	no	alert	36,1-38,9øC	0	Flucloxacillin	IV (parenteral)
H1-18-0021-1	Hospital 1	1960	58	2018-01-10	2018-01-10	2018-02-08	male	BLOOMY	Validation cohort	Staphylococcus aureus	no	cardiovascular	community acquired	gp1	survived	unknown	85	NA	no	yes	no	no	no	yes	no	no	no	no	no	no	yes	no	no	no	no	no	no	no	no	1	5	no	no	no	alert	36,1-38,9øC	0	Ceftriaxon	IV (parenteral)
H1-18-0032-1	Hospital 1	1962	56	2018-01-17	2018-01-17	2018-04-14	male	BLOOMY	Training cohort	Staphylococcus aureus	no	skin and soft tissue	community acquired	gp1	diseased	24.9153	89	189	no	no	no	no	no	no	no	no	no	no	no	no	yes	no	yes	no	yes	no	no	no	no	1	7	no	no	no	alert	36,1-38,9øC	0	Piperacillin+Tazobactam	NA
H1-18-0055-1	Hospital 1	1954	64	2018-02-02	2018-02-04	2018-02-21	male	BLOOMY	Training cohort	Staphylococcus aureus	no	skin and soft tissue	hospital acquired	gp4	survived	37.1332	123	182	no	no	no	no	no	no	no	no	no	yes	yes	no	no	no	yes	no	yes	no	no	no	no	2	10	no	no	no	alert	36,1-38,9øC	0	Piperacillin+Tazobactam	IV (parenteral)
H1-18-0059-1	Hospital 1	1973	45	2018-02-01	2018-02-09	2018-02-27	female	BLOOMY	Training cohort	Staphylococcus aureus	no	cardiovascular; intravasale foreign body	hospital acquired	gp1	survived	25.3906	65	160	no	no	no	no	no	no	no	no	no	yes	no	no	no	no	no	no	no	no	no	no	no	1	4	yes	no	no	alert	36,1-38,9øC	2	Ceftriaxon	IV (parenteral)
H1-18-0073-1	Hospital 1	1974	44	2018-02-07	2018-02-17	2018-03-14	male	BLOOMY	Training cohort	Staphylococcus aureus	no	abdominal	hospital acquired	gp1	survived	23.7654	77	180	no	no	no	no	no	no	no	no	no	no	no	no	no	no	yes	no	yes	no	no	no	no	1	5	no	no	no	alert	36,1-38,9øC	0	Piperacillin+Tazobactam	IV (parenteral)
H1-18-0074-1	Hospital 1	1952	66	2018-02-21	2018-02-21	2018-03-23	male	BLOOMY	Training cohort	Staphylococcus aureus	no	skin and soft tissue	community acquired	gp1	survived	20.0617	65	180	no	no	no	no	no	yes	no	no	no	no	no	no	no	no	no	no	no	no	no	no	no	2	3	unknown	no	no	alert	36,1-38,9øC	0	Flucloxacillin	IV (parenteral)
H1-18-0075-1	Hospital 1	1950	68	2018-02-06	2018-02-20	2018-03-23	male	BLOOMY	Training cohort	Staphylococcus aureus	no	skin and soft tissue	hospital acquired	gp1	survived	30.3871	104	185	no	no	no	no	no	no	no	no	no	yes	no	no	no	no	no	no	no	no	no	no	no	2	5	no	no	no	alert	36,1-38,9øC	0	Piperacillin+Tazobactam	IV (parenteral)
H1-18-0092-1	Hospital 1	1971	47	2018-02-20	2018-03-03	2018-03-17	female	BLOOMY	Validation cohort	Staphylococcus aureus	no	skin and soft tissue	hospital acquired	gp1	survived	22.719	56	157	no	no	no	no	no	no	no	no	no	no	no	no	no	no	yes	no	no	yes	no	no	no	1	5	yes	no	no	alert	35,1-36,0øC or 39,0-39,9øC	3	Piperacillin+Tazobactam	IV (parenteral)
H1-18-0093-1	Hospital 1	1951	67	2018-03-03	2018-03-03	2018-03-27	male	BLOOMY	Training cohort	Staphylococcus aureus	no	urogenital	community acquired	gp1	survived	37.037	120	180	no	no	no	no	no	no	no	no	no	no	yes	no	no	no	yes	no	no	no	no	no	no	2	5	no	no	no	alert	36,1-38,9øC	0	Piperacillin+Tazobactam	IV (parenteral)
H1-18-0096-1	Hospital 1	1954	64	2018-03-02	2018-03-02	2018-04-05	male	BLOOMY	Training cohort	Staphylococcus aureus	no	skin and soft tissue	community acquired	gp1	survived	25.2493	80	178	no	no	no	no	no	no	no	no	no	no	no	yes	no	no	no	no	no	no	no	no	no	2	4	no	no	no	alert	36,1-38,9øC	0	Sultamicillin	IV (parenteral)
H1-18-0113-1	Hospital 1	1944	74	2018-01-29	2018-03-14	2018-04-11	male	BLOOMY	Training cohort	Staphylococcus aureus	no	bone and joint	hospital acquired	gp3	survived	23.1241	80	186	no	yes	no	no	no	yes	no	no	no	no	no	no	no	no	no	no	no	no	no	no	no	3	5	no	no	no	alert	36,1-38,9øC	0	Ceftriaxon	IV (parenteral)
H1-18-0149-1	Hospital 1	1967	51	2018-04-09	2018-04-09	2018-05-16	female	BLOOMY	Training cohort	Staphylococcus aureus	no	cardiovascular; intravasale foreign body	community acquired	gp1	diseased	19.7232	57	170	no	no	no	no	no	no	no	no	no	yes	no	no	no	no	yes	no	no	no	no	no	no	1	6	no	no	no	alert	35,1-36,0øC or 39,0-39,9øC	1	Flucloxacillin	IV (parenteral)
H1-18-0168-1	Hospital 1	1958	60	2018-04-17	2018-04-25	2018-05-09	female	BLOOMY	Training cohort	Staphylococcus aureus	no	cardiovascular; intravasale foreign body	hospital acquired	gp1	survived	21.6311	54	158	no	no	no	no	no	no	no	no	no	no	no	no	no	no	yes	no	no	yes	no	no	no	2	6	no	no	no	alert	35,1-36,0øC or 39,0-39,9øC	1	Piperacillin+Tazobactam	IV (parenteral)
H1-18-0192-1	Hospital 1	1977	41	2018-05-08	2018-05-08	2018-07-03	male	BLOOMY	Validation cohort	Staphylococcus aureus	no	cerebral	community acquired	gp1	survived	unknown	NA	NA	no	yes	no	no	no	no	yes	no	no	no	no	no	no	no	no	no	no	no	no	no	no	1	3	no	no	no	disoriented	36,1-38,9øC	1	Ceftriaxon	IV (parenteral)
H1-18-0281-1	Hospital 1	1954	64	2018-06-22	2018-06-30	2018-07-18	female	BLOOMY	Training cohort	Staphylococcus aureus	no	abdominal	hospital acquired	gp1	survived	20.9042	59	168	no	no	no	no	no	no	no	no	no	no	no	no	no	no	yes	no	no	yes	no	no	no	2	6	no	no	no	alert	36,1-38,9øC	0	Piperacillin+Tazobactam	IV (parenteral)
H1-18-0284-1	Hospital 1	1961	57	2018-06-17	2018-07-02	2018-07-19	female	BLOOMY	Validation cohort	Staphylococcus aureus	no	cardiovascular; intravasale foreign body	hospital acquired	gp1	survived	26.7539	81	174	yes	no	no	no	no	no	no	no	no	no	no	no	no	no	yes	no	no	yes	no	no	no	1	6	yes	no	no	alert	35,1-36,0øC or 39,0-39,9øC	3	Flucloxacillin	IV (parenteral)
H1-18-0287-1	Hospital 1	1995	23	2018-06-23	2018-07-01	2018-07-17	male	BLOOMY	Training cohort	Staphylococcus aureus	no	cardiovascular	hospital acquired	gp3	survived	24.9153	89	189	no	no	no	no	no	no	no	no	yes	no	no	no	no	no	no	no	no	no	no	no	no	1	2	no	no	no	alert	36,1-38,9øC	0	Amoxicillin	oral
H1-18-0328-1	Hospital 1	1951	67	2018-08-04	NA	2018-08-21	male	BLOOMY	Training cohort	Staphylococcus aureus	no	skin and soft tissue	community acquired	gp1	survived	unknown	100	NA	no	no	no	no	no	no	no	no	no	no	yes	no	no	no	no	no	no	no	no	no	no	2	3	no	no	no	alert	36,1-38,9øC	0	Flucloxacillin	IV (parenteral)
H1-18-0343-1	Hospital 1	1951	67	2018-08-27	2018-08-27	2018-10-09	female	BLOOMY	Validation cohort	Staphylococcus aureus	no	cardiovascular	community acquired	gp1	survived	21.4844	55	160	no	yes	no	no	no	no	no	no	no	no	no	no	no	no	yes	no	no	yes	no	no	no	2	7	yes	no	no	alert	36,1-38,9øC	2	Piperacillin+Tazobactam	IV (parenteral)
H1-18-0346-1	Hospital 1	1967	51	2018-08-01	2018-08-04	2018-09-06	male	BLOOMY	Training cohort	Staphylococcus aureus	no	cardiovascular; intravasale foreign body	hospital acquired	gp2	survived	15.3967	51	182	yes	yes	no	no	no	yes	no	no	yes	no	no	no	no	no	no	no	no	no	yes	yes	no	1	11	yes	no	no	alert	36,1-38,9øC	2	Flucloxacillin	IV (parenteral)
H1-18-0351-1	Hospital 1	1983	35	2018-09-10	2018-09-10	2018-09-30	male	BLOOMY	Training cohort	Staphylococcus aureus	no	cardiovascular	community acquired	gp1	survived	26.4721	82	176	no	no	no	no	no	no	yes	no	no	no	no	no	no	no	yes	no	no	no	no	no	no	1	4	no	no	no	alert	36,1-38,9øC	0	Piperacillin+Tazobactam	IV (parenteral)
H1-18-0354-1	Hospital 1	1988	30	2018-08-23	2018-09-06	2018-09-25	male	BLOOMY	Validation cohort	Staphylococcus aureus	no	cardiovascular; intravasale foreign body	hospital acquired	gp3	survived	22.46	68	174	no	no	no	no	no	no	no	no	no	no	no	no	no	no	yes	no	yes	no	no	no	no	1	5	no	no	no	alert	36,1-38,9øC	0	Ceftriaxon	IV (parenteral)
H1-18-0360-1	Hospital 1	1950	68	2018-09-19	2018-09-20	2018-10-26	female	BLOOMY	Validation cohort	Staphylococcus aureus	no	skin and soft tissue	community acquired	gp1	survived	17.0068	48	168	no	no	no	no	no	no	no	no	no	no	no	no	no	no	yes	no	no	yes	no	no	no	2	6	no	no	no	alert	35,1-36,0øC or 39,0-39,9øC	1	Ceftriaxon	IV (parenteral)
H1-18-0399-1	Hospital 1	1942	76	2018-10-01	2018-10-01	2018-10-26	male	BLOOMY	Validation cohort	Staphylococcus aureus	no	skin and soft tissue	community acquired	gp1	survived	21.6049	70	180	no	no	no	no	no	no	no	no	no	no	no	no	no	no	yes	yes	no	yes	no	no	no	3	13	yes	no	no	alert	36,1-38,9øC	2	Piperacillin+Tazobactam	IV (parenteral)
H1-18-0415-1	Hospital 1	1950	68	2018-10-16	2018-10-25	2018-11-08	male	BLOOMY	Training cohort	Staphylococcus aureus	no	cardiovascular; intravasale foreign body	hospital acquired	gp1	survived	26.2346	85	180	no	no	no	no	no	no	no	no	no	no	no	no	yes	no	yes	no	no	yes	no	no	no	2	8	no	no	no	alert	36,1-38,9øC	0	Piperacillin+Tazobactam	IV (parenteral)
H1-18-0418-1	Hospital 1	1940	78	2018-11-03	2018-11-04	2018-11-19	male	BLOOMY	Training cohort	Staphylococcus aureus	no	respiratory	community acquired	gp1	survived	25.1811	89	188	no	no	no	no	no	no	no	no	no	no	no	no	yes	no	yes	yes	no	no	no	no	no	3	13	yes	no	no	alert	36,1-38,9øC	2	Piperacillin+Tazobactam	IV (parenteral)
H1-18-0437-1	Hospital 1	1963	55	2018-10-31	2018-11-06	2018-11-26	male	BLOOMY	Training cohort	Staphylococcus aureus	no	no focus identified	hospital acquired	gp3	survived	unknown	78	NA	no	no	no	no	no	no	yes	no	no	yes	no	no	yes	no	yes	no	no	no	no	no	no	1	9	no	no	no	alert	36,1-38,9øC	0	Piperacillin+Tazobactam	IV (parenteral)
H1-18-0575-1	Hospital 1	1954	64	2018-11-29	2018-12-18	2019-03-05	male	BLOOMY	Training cohort	Staphylococcus aureus	no	skin and soft tissue	hospital acquired	gp1	diseased	25.6971	87	184	no	no	no	no	no	yes	no	no	no	yes	no	no	no	no	yes	yes	no	no	no	no	no	2	14	no	no	no	alert	36,1-38,9øC	0	Flucloxacillin	IV (parenteral)
H1-18-0576-1	Hospital 1	1947	71	2018-10-17	2018-12-23	2019-02-23	female	BLOOMY	Training cohort	Staphylococcus aureus	yes	cardiovascular; intravasale foreign body	hospital acquired	gp1	survived	33.2031	85	160	no	yes	no	no	no	no	no	no	no	no	no	yes	yes	no	no	no	no	no	no	no	no	3	8	no	no	no	alert	36,1-38,9øC	0	Ceftriaxon	IV (parenteral)
H1-18-0577-1	Hospital 1	1962	56	2018-12-14	2018-12-24	2019-01-03	male	BLOOMY	Training cohort	Staphylococcus aureus	no	no focus identified	hospital acquired	gp1	survived	31.9193	100	177	no	no	no	no	no	no	no	no	no	no	no	no	no	no	yes	no	no	yes	no	no	no	1	5	no	no	no	alert	36,1-38,9øC	0	Piperacillin+Tazobactam	IV (parenteral)
H2-17-0159-1	Hospital 2	1936	81	2017-04-02	2017-04-02	2017-04-18	male	BLOOMY	Training cohort	Staphylococcus aureus	no	skin and soft tissue	community acquired	gp1	survived	28.0864	91	180	no	no	no	no	no	no	no	no	no	no	no	yes	no	no	yes	no	no	no	no	no	no	4	8	no	no	no	alert	36,1-38,9øC	0	Ampicillin+Sulbactam	IV (parenteral)
H2-17-0175-1	Hospital 2	1952	65	2017-04-07	2017-04-08	2017-04-20	female	BLOOMY	Validation cohort	Staphylococcus aureus	no	cardiovascular; intravasale foreign body	community acquired	gp1	survived	32.4662	78	155	no	no	no	no	no	no	no	no	no	no	no	no	no	no	no	no	no	no	no	no	yes	2	2	no	no	no	alert	=< 35øC oder >= 40øC	2	Meropenem	IV (parenteral)
H2-17-0182-1	Hospital 2	1970	47	2017-04-11	2017-04-11	2017-04-22	male	BLOOMY	Training cohort	Staphylococcus aureus	no	cardiovascular; intravasale foreign body	community acquired	gp3	diseased	unknown	NA	NA	no	no	no	no	no	no	no	no	no	no	no	NA	yes	no	no	no	NA	NA	no	NA	NA	1	3	yes	yes	no	comatose	=< 35øC oder >= 40øC	10	Vancomycin	IV (parenteral)
H2-17-0190-1	Hospital 2	1952	65	2017-04-10	2017-04-16	2017-04-21	male	BLOOMY	Training cohort	Staphylococcus aureus	no	skin and soft tissue	hospital acquired	gp1	survived	34.4922	113	181	no	yes	no	no	no	no	no	no	yes	no	no	yes	no	no	no	no	no	no	no	no	no	2	6	no	no	no	alert	36,1-38,9øC	0	Ampicillin+Sulbactam	IV (parenteral)
H2-17-0206-1	Hospital 2	1942	75	2017-04-23	2017-04-23	2017-04-25	male	BLOOMY	Training cohort	Staphylococcus aureus	no	cardiovascular	community acquired	gp2	diseased	unknown	NA	NA	no	no	no	no	no	no	yes	no	no	no	no	no	no	no	no	no	NA	NA	no	NA	NA	3	4	no	no	no	comatose	35,1-36,0øC or 39,0-39,9øC	5	Piperacillin+Tazobactam	IV (parenteral)
H2-17-0211-1	Hospital 2	1930	87	2017-04-27	2017-04-27	2017-05-22	male	BLOOMY	Training cohort	Staphylococcus aureus	no	bone and joint	community acquired	gp3	survived	24.1115	73	174	no	no	no	no	no	no	no	no	no	no	no	yes	no	no	no	no	NA	NA	no	no	no	4	6	no	no	no	alert	36,1-38,9øC	0	Cefazolin	IV (parenteral)
H2-17-0221-1	Hospital 2	1965	52	2017-05-01	2017-05-01	2017-05-11	female	BLOOMY	Training cohort	Staphylococcus aureus	no	no focus identified	community acquired	gp1	diseased	unknown	NA	NA	no	no	no	no	no	no	no	no	yes	no	no	no	no	no	no	no	NA	NA	no	NA	NA	1	2	yes	no	no	alert	36,1-38,9øC	2	Piperacillin+Tazobactam	IV (parenteral)
H2-17-0223-1	Hospital 2	1952	65	2017-05-03	2017-05-04	2017-05-20	male	BLOOMY	Training cohort	Staphylococcus aureus	no	respiratory	NA	gp1	survived	28.4091	88	176	no	no	no	no	no	no	no	no	no	no	no	no	no	no	no	no	NA	NA	unknown	NA	NA	2	2	no	no	no	alert	36,1-38,9øC	0	Ampicillin+Sulbactam	IV (parenteral)
H2-17-0227-1	Hospital 2	1962	55	2017-05-09	2017-05-09	2017-05-19	male	BLOOMY	Validation cohort	Staphylococcus aureus	no	cardiovascular; intravasale foreign body	community acquired	gp3	diseased	unknown	92	NA	no	yes	no	no	no	no	no	no	no	no	no	no	yes	no	no	no	no	no	no	no	no	1	4	yes	yes	no	comatose	36,1-38,9øC	8	Flucloxacillin	IV (parenteral)
H2-17-0234-1	Hospital 2	1951	66	2017-05-09	2017-05-10	2017-07-18	male	BLOOMY	Validation cohort	Staphylococcus aureus	no	bone and joint	NA	gp1	survived	22.46	68	174	no	no	no	no	no	no	no	no	no	no	no	no	yes	no	no	no	no	no	no	no	no	2	4	no	no	no	alert	36,1-38,9øC	0	Piperacillin+Tazobactam	IV (parenteral)
H2-17-0265-1	Hospital 2	1968	49	2017-05-24	2017-05-24	2017-06-29	female	BLOOMY	Training cohort	Staphylococcus aureus	no	cardiovascular; intravasale foreign body	community acquired	gp1	survived	20.0692	58	170	no	no	no	no	no	no	no	no	no	no	no	no	no	no	yes	yes	no	no	no	no	no	1	9	yes	no	no	alert	=< 35øC oder >= 40øC	4	Piperacillin+Tazobactam	IV (parenteral)
H2-17-0273-1	Hospital 2	1961	56	2017-05-29	2017-05-29	2017-06-07	male	BLOOMY	Training cohort	Staphylococcus aureus	no	cerebral	community acquired	gp1	survived	unknown	NA	NA	no	no	yes	no	no	no	no	no	no	no	no	no	no	no	no	no	no	no	no	no	no	1	2	no	no	no	alert	36,1-38,9øC	0	Ceftriaxon	IV (parenteral)
H2-17-0276-1	Hospital 2	1962	55	2017-05-30	2017-05-30	2017-06-03	male	BLOOMY	Training cohort	Staphylococcus aureus	no	cardiovascular; intravasale foreign body	community acquired	gp1	diseased	unknown	NA	NA	no	no	no	no	no	yes	no	no	no	no	yes	no	no	no	no	no	no	no	no	no	no	1	3	yes	yes	no	comatose	=< 35øC oder >= 40øC	10	Flucloxacillin	IV (parenteral)
H2-17-0280-1	Hospital 2	1965	52	2017-06-06	2017-06-06	2017-07-05	male	BLOOMY	Validation cohort	Staphylococcus aureus	no	bone and joint; foreign body	community acquired	gp1	survived	42.7337	140	181	no	no	no	no	no	no	no	no	no	no	yes	no	no	no	no	no	no	no	no	no	no	1	2	no	no	no	alert	36,1-38,9øC	0	Cefazolin	IV (parenteral)
H2-17-0286-1	Hospital 2	1941	76	2017-05-29	2017-06-09	2017-07-17	male	BLOOMY	Training cohort	Staphylococcus aureus	no	cardiovascular; intravasale foreign body	hospital acquired	gp1	survived	unknown	NA	NA	no	no	no	no	no	no	no	no	no	no	no	no	no	no	yes	no	no	yes	no	no	no	3	7	yes	no	no	alert	35,1-36,0øC or 39,0-39,9øC	3	Piperacillin+Tazobactam	IV (parenteral)
H2-17-0303-1	Hospital 2	1969	48	2017-06-21	2017-06-21	2017-07-24	male	BLOOMY	Training cohort	Staphylococcus aureus	no	bone and joint	community acquired	gp3	survived	unknown	NA	NA	no	no	no	no	no	no	no	no	yes	no	no	no	no	no	no	no	no	no	no	no	no	1	2	no	no	no	alert	35,1-36,0øC or 39,0-39,9øC	1	Vancomycin	IV (parenteral)
H2-17-0309-1	Hospital 2	1959	58	2017-06-09	2017-06-24	2017-09-22	male	BLOOMY	Validation cohort	Staphylococcus aureus	yes	cardiovascular; intravasale foreign body	hospital acquired	gp1	survived	25.3515	75	172	yes	yes	no	no	yes	yes	no	no	no	no	no	no	no	yes	no	no	NA	NA	no	no	yes	1	7	no	no	no	alert	35,1-36,0øC or 39,0-39,9øC	1	Erythromycin	IV (parenteral)
H2-17-0314-1	Hospital 2	1926	91	2017-06-23	2017-06-27	2017-07-01	female	BLOOMY	Training cohort	Staphylococcus aureus	no	cardiovascular; intravasale foreign body	hospital acquired	gp2	survived	22.8624	60	162	no	yes	no	no	no	no	no	no	no	no	no	no	no	no	no	no	NA	NA	no	no	no	5	6	no	no	no	alert	36,1-38,9øC	0	Flucloxacillin	IV (parenteral)
H2-17-0328-1	Hospital 2	1950	67	2017-06-30	2017-07-02	2017-07-03	male	BLOOMY	Training cohort	Staphylococcus aureus	yes	no focus identified	hospital acquired	gp1	diseased	21.875	56	160	no	no	yes	no	yes	no	no	no	no	no	no	no	no	no	yes	yes	NA	NA	no	no	no	2	12	no	no	no	disoriented	36,1-38,9øC	1	Piperacillin	IV (parenteral)
H2-17-0343-1	Hospital 2	1944	73	2017-06-27	2017-07-10	2017-08-04	male	BLOOMY	Training cohort	Staphylococcus aureus	no	skin and soft tissue	hospital acquired	gp3	survived	23.5898	79	183	no	yes	no	no	no	no	no	no	no	yes	no	no	no	no	yes	no	NA	NA	no	no	no	3	9	yes	no	no	disoriented	36,1-38,9øC	3	Piperacillin+Tazobactam	IV (parenteral)
H2-17-0358-1	Hospital 2	1966	51	2017-07-11	2017-07-14	2017-07-27	female	BLOOMY	Training cohort	Staphylococcus aureus	no	skin and soft tissue	hospital acquired	gp1	survived	20.5761	54	162	yes	no	no	no	no	no	no	no	no	no	no	no	no	no	no	no	no	no	no	no	no	1	2	no	no	no	alert	36,1-38,9øC	0	Ceftriaxon	IV (parenteral)
H2-17-0363-1	Hospital 2	1946	71	2017-07-17	2017-07-17	2017-08-04	male	BLOOMY	Training cohort	Staphylococcus aureus	no	skin and soft tissue	community acquired	gp1	survived	41.4314	124	173	no	yes	yes	no	no	yes	no	no	no	no	no	yes	yes	no	no	no	NA	NA	no	no	no	3	10	no	no	no	alert	36,1-38,9øC	0	Flucloxacillin	IV (parenteral)
H2-17-0364-1	Hospital 2	1953	64	2017-07-16	2017-07-17	2017-08-22	male	BLOOMY	Training cohort	Staphylococcus aureus	no	bone and joint	community acquired	gp1	survived	unknown	NA	NA	no	no	no	no	no	no	yes	no	no	no	no	no	no	no	no	no	NA	NA	no	no	no	2	3	yes	no	no	alert	36,1-38,9øC	2	other antibiotic substance	oral
H2-17-0373-1	Hospital 2	1940	77	2017-07-19	2017-07-23	2017-07-31	male	BLOOMY	Training cohort	Staphylococcus aureus	no	respiratory	hospital acquired	gp3	survived	30.0568	91	174	no	no	no	no	no	yes	no	no	no	no	no	yes	yes	no	yes	no	NA	NA	no	no	no	3	10	no	no	no	alert	35,1-36,0øC or 39,0-39,9øC	1	Piperacillin+Tazobactam	IV (parenteral)
H2-17-0377-1	Hospital 2	1943	73	2016-11-03	2017-07-24	2017-08-21	male	BLOOMY	Training cohort	Staphylococcus aureus	no	cardiovascular; intravasale foreign body	hospital acquired	gp1	diseased	unknown	NA	NA	no	no	no	no	no	no	no	no	no	no	no	no	yes	no	no	no	NA	NA	no	no	no	3	5	no	yes	no	alert	35,1-36,0øC or 39,0-39,9øC	3	Imipenem	IV (parenteral)
H2-17-0378-1	Hospital 2	1967	50	2017-07-25	2017-07-25	2017-08-07	female	BLOOMY	Training cohort	Staphylococcus aureus	no	respiratory	community acquired	gp2	survived	23.255	68	171	no	no	no	no	no	no	no	no	yes	no	no	no	no	no	no	no	no	no	no	no	no	1	2	no	no	no	alert	36,1-38,9øC	0	Ampicillin+Sulbactam	IV (parenteral)
H2-17-0382-1	Hospital 2	1937	80	2017-07-28	2017-07-28	2017-08-17	male	BLOOMY	Training cohort	Staphylococcus aureus	no	skin and soft tissue	community acquired	gp1	survived	25.42	87	185	no	no	yes	no	no	no	no	no	no	no	no	yes	no	no	no	no	NA	NA	no	no	no	4	7	no	no	no	alert	36,1-38,9øC	0	Cefazolin	IV (parenteral)
H2-17-0390-1	Hospital 2	1978	39	2017-08-01	2017-08-01	2017-09-21	female	BLOOMY	Training cohort	Staphylococcus aureus	no	cardiovascular	community acquired	gp1	survived	19.9481	53	163	no	no	no	no	no	no	no	no	yes	no	no	no	yes	no	no	no	NA	NA	no	no	no	1	4	yes	no	no	alert	36,1-38,9øC	2	Ciprofloxacin	IV (parenteral)
H2-17-0391-1	Hospital 2	1965	52	2017-08-04	2017-08-04	2017-10-02	male	BLOOMY	Training cohort	Staphylococcus aureus	no	urogenital	community acquired	gp1	survived	24.4898	75	175	no	no	no	no	no	no	no	no	no	no	no	no	yes	no	no	no	NA	NA	no	no	yes	1	3	no	yes	no	alert	36,1-38,9øC	2	Flucloxacillin	IV (parenteral)
H2-17-0394-1	Hospital 2	1941	76	2017-08-06	2017-08-06	2017-08-23	male	BLOOMY	Training cohort	Staphylococcus aureus	no	bone and joint	community acquired	gp3	survived	30.7934	102	182	no	no	no	no	no	no	no	no	no	no	yes	no	no	no	no	no	NA	NA	no	no	no	3	4	no	no	no	alert	36,1-38,9øC	0	Flucloxacillin	oral
H2-17-0395-1	Hospital 2	1966	51	2017-08-06	2017-08-06	2017-09-25	male	BLOOMY	Validation cohort	Staphylococcus aureus	yes	skin and soft tissue	community acquired	gp1	survived	unknown	86	NA	yes	yes	no	no	yes	no	no	no	yes	no	yes	no	no	no	no	no	NA	NA	no	no	no	1	6	yes	no	no	disoriented	35,1-36,0øC or 39,0-39,9øC	4	Vancomycin	IV (parenteral)
H2-17-0400-1	Hospital 2	1972	45	2017-08-05	2017-08-08	2017-08-31	male	BLOOMY	Training cohort	Staphylococcus aureus	no	cerebral; foreign body	hospital acquired	gp1	survived	unknown	NA	NA	no	no	no	no	yes	no	no	no	no	no	no	no	no	no	no	no	NA	NA	no	no	no	1	2	no	no	no	alert	35,1-36,0øC or 39,0-39,9øC	1	Flucloxacillin	IV (parenteral)
H2-17-0404-1	Hospital 2	1937	80	2017-08-06	2017-08-09	2017-08-23	male	BLOOMY	Training cohort	Staphylococcus aureus	yes	cardiovascular; intravasale foreign body	hospital acquired	gp1	survived	unknown	60	NA	no	no	no	no	no	no	no	no	no	no	no	no	no	no	no	no	NA	NA	no	no	no	4	4	no	no	no	alert	36,1-38,9øC	0	other antibiotic substance	IV (parenteral)
H2-17-0405-1	Hospital 2	1942	75	2017-07-24	2017-08-09	2017-09-01	male	BLOOMY	Validation cohort	Staphylococcus aureus	yes	bone and joint	hospital acquired	gp1	survived	unknown	80	NA	no	no	no	no	no	no	no	no	no	no	no	no	no	no	no	no	NA	NA	no	no	no	3	3	no	no	no	alert	35,1-36,0øC or 39,0-39,9øC	1	Linezolid	IV (parenteral)
H2-17-0412-1	Hospital 2	1960	57	2017-08-13	2017-08-13	2017-08-28	male	BLOOMY	Training cohort	Staphylococcus aureus	no	bone and joint	community acquired	gp1	survived	30.6091	120	198	no	no	no	no	no	no	no	no	no	no	no	yes	no	no	no	no	NA	NA	no	no	no	1	3	no	no	no	alert	35,1-36,0øC or 39,0-39,9øC	1	Flucloxacillin	IV (parenteral)
H2-17-0416-1	Hospital 2	1930	87	2017-08-05	2017-08-16	2017-08-26	male	BLOOMY	Validation cohort	Staphylococcus aureus	no	no focus identified	hospital acquired	gp3	survived	22.4913	65	170	yes	no	no	no	no	yes	no	no	no	no	no	no	yes	no	no	no	NA	NA	no	no	no	4	8	no	no	no	alert	36,1-38,9øC	0	Piperacillin+Tazobactam	IV (parenteral)
H2-17-0417-1	Hospital 2	1962	55	2017-08-16	2017-08-16	2017-08-19	male	BLOOMY	Training cohort	Staphylococcus aureus	no	no focus identified	community acquired	gp2	diseased	unknown	NA	NA	no	no	no	no	no	no	no	no	no	yes	yes	no	yes	no	no	no	NA	NA	no	no	no	1	7	no	yes	no	comatose	36,1-38,9øC	6	Piperacillin+Tazobactam	IV (parenteral)
H2-17-0422-1	Hospital 2	1964	53	2017-08-17	2017-08-17	2017-08-30	female	BLOOMY	Training cohort	Staphylococcus aureus	no	bone and joint	community acquired	gp2	survived	28.9051	100	186	no	no	no	no	no	no	no	no	no	no	no	no	no	no	no	no	NA	NA	no	no	no	1	1	no	no	no	alert	36,1-38,9øC	0	Cefazolin	IV (parenteral)
H2-17-0423-1	Hospital 2	1996	21	2017-07-06	2017-08-19	2017-10-12	female	BLOOMY	Training cohort	Staphylococcus aureus	no	cardiovascular; intravasale foreign body	hospital acquired	gp1	survived	10.7266	31	170	no	no	no	no	no	no	no	no	no	no	no	no	no	no	no	no	no	no	no	no	yes	1	1	no	no	no	alert	36,1-38,9øC	0	Piperacillin+Tazobactam	IV (parenteral)
H2-17-0430-1	Hospital 2	1929	88	2017-08-22	2017-08-22	2017-08-27	male	BLOOMY	Training cohort	Staphylococcus aureus	no	skin and soft tissue	community acquired	gp2	diseased	18.6851	54	170	no	no	no	no	no	no	no	no	no	no	no	no	no	no	no	no	NA	NA	no	yes	no	4	4	no	yes	no	alert	36,1-38,9øC	2	Linezolid	IV (parenteral)
H2-17-0445-1	Hospital 2	1945	72	2017-08-14	2017-08-30	2017-09-08	female	BLOOMY	Training cohort	Staphylococcus aureus	no	cardiovascular; intravasale foreign body	hospital acquired	gp1	survived	43.0657	123	169	no	yes	yes	no	no	no	no	no	no	no	yes	no	no	no	no	no	NA	NA	no	no	no	3	6	no	no	no	alert	36,1-38,9øC	0	Piperacillin+Tazobactam	IV (parenteral)
H2-17-0456-1	Hospital 2	1945	72	2017-09-05	2017-09-06	2017-11-16	male	BLOOMY	Training cohort	Staphylococcus aureus	no	skin and soft tissue	community acquired	gp1	survived	28.9262	99	185	no	no	yes	no	no	no	no	no	no	no	no	yes	yes	no	no	no	NA	NA	no	no	no	3	8	no	no	no	alert	36,1-38,9øC	0	Piperacillin+Tazobactam	IV (parenteral)
H2-17-0459-1	Hospital 2	1941	76	2017-09-05	2017-09-08	2017-09-27	male	BLOOMY	Validation cohort	Staphylococcus aureus	no	cardiovascular	hospital acquired	gp1	survived	24.4898	75	175	no	no	no	yes	no	no	no	no	no	no	no	no	no	no	no	no	NA	NA	no	no	no	3	4	no	no	no	alert	36,1-38,9øC	0	Piperacillin+Tazobactam	IV (parenteral)
H2-17-0469-1	Hospital 2	1976	41	2017-09-13	2017-09-13	2017-10-02	female	BLOOMY	Training cohort	Staphylococcus aureus	no	bone and joint; foreign body	community acquired	gp1	survived	unknown	54	NA	no	no	no	no	no	no	no	no	no	yes	no	no	no	no	no	no	NA	NA	no	no	no	1	4	unknown	no	no	alert	36,1-38,9øC	0	Cefazolin	IV (parenteral)
H2-17-0471-1	Hospital 2	1966	51	2017-09-13	2017-09-14	2017-09-18	male	BLOOMY	Training cohort	Staphylococcus aureus	no	abdominal	community acquired	gp2	diseased	15.4959	48	176	no	no	no	no	no	no	no	no	no	no	no	no	yes	no	yes	no	NA	NA	no	no	no	1	5	yes	no	no	alert	35,1-36,0øC or 39,0-39,9øC	3	Piperacillin+Tazobactam	IV (parenteral)
H2-17-0473-1	Hospital 2	1963	54	2017-09-04	2017-09-15	2017-09-27	male	BLOOMY	Training cohort	Staphylococcus aureus	no	cardiovascular	hospital acquired	gp3	survived	23.0879	86	193	no	no	no	no	no	no	no	no	no	no	no	no	yes	no	no	no	NA	NA	no	no	no	1	3	no	no	no	alert	36,1-38,9øC	0	Paromomycin	oral
H2-17-0475-1	Hospital 2	1963	54	2017-09-15	2017-09-16	2017-09-17	male	BLOOMY	Validation cohort	Staphylococcus aureus	no	cardiovascular	community acquired	gp1	diseased	unknown	NA	185	no	no	no	no	no	no	no	no	no	no	no	no	yes	no	no	no	NA	NA	no	no	no	1	3	yes	yes	yes	comatose	36,1-38,9øC	12	Ampicillin	IV (parenteral)
H2-17-0476-1	Hospital 2	1932	85	2017-09-16	2017-09-16	2017-09-22	female	BLOOMY	Training cohort	Staphylococcus aureus	no	skin and soft tissue	community acquired	gp1	diseased	33.0579	90	165	no	no	no	no	no	no	no	no	no	no	no	yes	yes	no	no	no	NA	NA	no	no	no	4	8	no	yes	no	comatose	36,1-38,9øC	6	Linezolid	IV (parenteral)
H2-17-0477-1	Hospital 2	1935	82	2017-09-16	2017-09-16	2017-10-06	male	BLOOMY	Training cohort	Staphylococcus aureus	no	cardiovascular	community acquired	gp3	survived	unknown	82	NA	no	no	yes	no	no	no	no	no	no	no	no	no	no	no	no	no	NA	NA	no	no	no	4	5	no	no	no	alert	36,1-38,9øC	0	Piperacillin+Tazobactam	IV (parenteral)
H2-17-0478-1	Hospital 2	1942	75	2017-09-17	2017-09-17	2017-10-02	male	BLOOMY	Training cohort	Staphylococcus aureus	no	no focus identified	community acquired	gp1	survived	unknown	NA	NA	no	no	no	no	no	no	no	no	no	no	yes	no	no	no	yes	no	NA	NA	no	no	no	3	6	no	no	no	alert	35,1-36,0øC or 39,0-39,9øC	1	Ciprofloxacin	IV (parenteral)
H2-17-0480-1	Hospital 2	1930	87	2017-09-18	2017-09-18	2017-09-24	male	BLOOMY	Training cohort	Staphylococcus aureus	no	no focus identified	community acquired	gp1	diseased	unknown	NA	NA	yes	no	yes	no	no	no	no	no	no	no	no	no	no	yes	no	no	NA	NA	no	no	no	4	8	yes	no	no	comatose	36,1-38,9øC	6	Piperacillin+Tazobactam	IV (parenteral)
H2-17-0485-1	Hospital 2	1939	78	2017-09-20	2017-09-20	2017-09-20	male	BLOOMY	Training cohort	Staphylococcus aureus	no	bone and joint; foreign body	community acquired	gp1	diseased	29.2184	100	185	no	no	yes	no	no	no	no	no	no	no	no	no	yes	no	no	no	NA	NA	no	no	no	3	6	yes	yes	no	comatose	=< 35øC oder >= 40øC	10	Ampicillin+Sulbactam	IV (parenteral)
H2-17-0503-1	Hospital 2	1943	74	2017-09-29	2017-09-29	2017-10-23	female	BLOOMY	Training cohort	Staphylococcus aureus	no	no focus identified	community acquired	gp1	survived	24.3824	68	167	no	no	no	no	no	no	no	no	no	no	no	no	no	no	no	no	NA	NA	no	no	no	3	3	no	no	no	alert	36,1-38,9øC	0	Piperacillin+Tazobactam	IV (parenteral)
H2-17-0504-1	Hospital 2	1954	63	2017-09-29	2017-09-29	2017-10-15	male	BLOOMY	Validation cohort	Staphylococcus aureus	no	cardiovascular; intravasale foreign body	community acquired	gp2	survived	unknown	61	NA	no	no	no	no	no	no	no	no	no	no	no	no	yes	no	no	no	no	no	no	no	no	2	4	no	no	no	alert	35,1-36,0øC or 39,0-39,9øC	1	Ceftriaxon	IV (parenteral)
H2-17-0515-1	Hospital 2	1939	78	2017-09-30	2017-10-04	2017-10-26	female	BLOOMY	Validation cohort	Staphylococcus aureus	no	cardiovascular; intravasale foreign body	hospital acquired	gp1	survived	unknown	NA	NA	no	no	no	no	no	yes	no	no	no	no	no	no	no	yes	yes	no	NA	NA	no	no	no	3	8	no	no	no	alert	36,1-38,9øC	0	Piperacillin+Tazobactam	IV (parenteral)
H2-17-0531-1	Hospital 2	1966	51	2017-10-12	2017-10-13	2017-10-30	male	BLOOMY	Validation cohort	Staphylococcus aureus	no	bone and joint	community acquired	gp1	diseased	22.8571	70	175	no	no	no	no	no	no	no	no	yes	no	no	no	no	yes	no	no	NA	NA	no	no	no	1	4	yes	yes	no	comatose	36,1-38,9øC	8	Ampicillin	IV (parenteral)
H2-17-0536-1	Hospital 2	1957	60	2017-10-14	2017-10-15	2017-10-16	female	BLOOMY	Training cohort	Staphylococcus aureus	no	respiratory	community acquired	gp2	diseased	unknown	NA	NA	no	no	no	no	no	yes	no	no	yes	no	yes	unknown	no	no	no	no	no	no	no	no	no	2	5	yes	yes	no	comatose	=< 35øC oder >= 40øC	10	Clarithromycin	IV (parenteral)
H2-17-0552-1	Hospital 2	1988	29	2017-10-09	2017-10-21	2018-01-15	male	BLOOMY	Training cohort	Staphylococcus aureus	no	cardiovascular; intravasale foreign body	hospital acquired	gp1	survived	14.6687	47	179	no	no	no	no	no	no	no	no	no	no	no	no	no	no	no	no	NA	NA	no	no	no	1	1	no	no	no	alert	36,1-38,9øC	0	Piperacillin+Tazobactam	IV (parenteral)
H2-17-0560-1	Hospital 2	1946	71	2017-10-25	2017-10-25	2017-11-04	male	BLOOMY	Validation cohort	Staphylococcus aureus	no	bone and joint	community acquired	gp1	diseased	57.0934	165	170	no	no	no	no	no	no	no	no	no	no	yes	no	yes	no	no	no	NA	NA	no	no	no	3	6	no	yes	no	comatose	36,1-38,9øC	6	Piperacillin+Tazobactam	IV (parenteral)
H2-17-0566-1	Hospital 2	1936	81	2017-11-01	2017-11-02	2017-11-05	male	BLOOMY	Training cohort	Staphylococcus aureus	no	no focus identified	community acquired	gp2	diseased	unknown	NA	NA	yes	no	no	no	yes	yes	no	no	no	no	no	no	no	no	NA	no	no	no	no	no	no	4	7	yes	no	no	disoriented	36,1-38,9øC	3	Piperacillin+Tazobactam	IV (parenteral)
H2-17-0570-1	Hospital 2	1943	74	2017-11-04	2017-11-04	2017-11-11	female	BLOOMY	Training cohort	Staphylococcus aureus	no	bone and joint	community acquired	gp1	diseased	29.4118	85	170	no	no	no	no	no	no	no	no	no	no	yes	no	yes	no	no	no	NA	NA	no	no	no	3	6	no	yes	no	comatose	36,1-38,9øC	6	Ampicillin+Sulbactam	IV (parenteral)
H2-17-0576-1	Hospital 2	1970	47	2017-11-02	2017-11-07	2017-12-06	male	BLOOMY	Validation cohort	Staphylococcus aureus	no	cardiovascular; intravasale foreign body	hospital acquired	gp1	survived	unknown	NA	NA	no	no	no	no	no	no	no	no	no	no	no	no	no	no	no	no	NA	NA	no	no	no	1	1	yes	no	no	alert	35,1-36,0øC or 39,0-39,9øC	3	Piperacillin+Tazobactam	IV (parenteral)
H2-17-0604-1	Hospital 2	1959	58	2017-11-26	2017-11-26	2017-12-12	male	BLOOMY	Training cohort	Staphylococcus aureus	no	bone and joint	community acquired	gp1	survived	18.937	60	178	no	no	no	no	no	no	no	no	no	no	no	no	no	no	no	no	NA	NA	no	no	no	1	1	no	yes	no	comatose	=< 35øC oder >= 40øC	8	Ceftriaxon	IV (parenteral)
H2-17-0610-1	Hospital 2	1963	54	2017-11-29	2017-11-30	2018-01-16	male	BLOOMY	Training cohort	Staphylococcus aureus	no	bone and joint	community acquired	gp2	survived	33.6012	115	185	no	no	no	no	no	no	no	no	no	no	no	no	no	no	no	no	NA	NA	no	no	no	1	1	no	no	no	alert	36,1-38,9øC	0	Flucloxacillin	IV (parenteral)
H2-17-0615-1	Hospital 2	1959	58	2017-11-28	2017-12-04	2017-12-14	male	BLOOMY	Training cohort	Staphylococcus aureus	no	cardiovascular; intravasale foreign body	hospital acquired	gp3	diseased	unknown	NA	NA	no	yes	no	no	yes	no	no	no	no	yes	no	yes	no	no	no	no	NA	NA	no	no	no	1	8	yes	no	no	stuporous	35,1-36,0øC or 39,0-39,9øC	5	Piperacillin+Tazobactam	IV (parenteral)
H2-17-0619-1	Hospital 2	1954	63	2017-12-06	2017-12-06	2017-12-20	male	BLOOMY	Training cohort	Staphylococcus aureus	no	cardiovascular; intravasale foreign body	community acquired	gp1	survived	22.6474	67	172	no	no	no	no	no	no	no	no	no	no	no	no	yes	no	no	no	NA	NA	no	no	no	2	4	no	no	no	alert	36,1-38,9øC	0	Ampicillin+Sulbactam	IV (parenteral)
H2-17-0621-1	Hospital 2	1939	78	2017-12-06	2017-12-06	2017-12-14	male	BLOOMY	Training cohort	Staphylococcus aureus	no	skin and soft tissue	community acquired	gp1	diseased	34.6021	100	170	no	no	no	no	no	no	no	no	no	no	yes	no	yes	no	no	no	NA	NA	no	no	no	3	6	no	no	no	alert	35,1-36,0øC or 39,0-39,9øC	1	Piperacillin+Tazobactam	IV (parenteral)
H2-17-0625-1	Hospital 2	1939	78	2017-12-14	2017-12-13	2017-12-22	male	BLOOMY	Validation cohort	Staphylococcus aureus	no	cardiovascular	community acquired	gp1	survived	29.0859	105	190	no	no	no	no	no	no	no	no	no	no	no	yes	no	no	yes	no	NA	NA	no	no	no	3	7	no	no	no	alert	35,1-36,0øC or 39,0-39,9øC	1	other antibiotic substance	oral
H2-17-0626-1	Hospital 2	1965	52	2017-12-13	2017-12-13	2018-03-05	female	BLOOMY	Training cohort	Staphylococcus aureus	no	bone and joint	community acquired	gp1	survived	24.4646	65	163	no	no	no	no	no	no	no	no	no	no	no	yes	no	no	no	no	no	no	no	no	no	1	3	no	no	no	alert	36,1-38,9øC	0	Cefazolin	IV (parenteral)
H2-17-0638-1	Hospital 2	1948	69	2017-12-05	2017-12-18	2017-12-29	male	BLOOMY	Training cohort	Staphylococcus aureus	no	cardiovascular; intravasale foreign body	hospital acquired	gp1	survived	21.201	71	183	no	no	no	no	no	no	no	no	no	no	no	no	no	no	yes	no	NA	NA	no	no	no	2	4	no	no	no	alert	35,1-36,0øC or 39,0-39,9øC	1	Flucloxacillin	IV (parenteral)
H2-17-0639-1	Hospital 2	1959	58	2017-12-12	2017-12-18	2018-01-01	male	BLOOMY	Training cohort	Staphylococcus aureus	no	cardiovascular; intravasale foreign body	hospital acquired	gp1	survived	30.4705	86	168	no	no	no	no	no	no	no	no	no	no	no	no	no	no	no	no	NA	NA	no	no	no	1	1	no	no	no	alert	36,1-38,9øC	0	Piperacillin+Tazobactam	IV (parenteral)
H2-17-0641-1	Hospital 2	1929	88	2017-12-19	2017-12-19	2017-12-20	male	BLOOMY	Validation cohort	Staphylococcus aureus	no	bone and joint	community acquired	gp2	diseased	23.8751	65	165	no	no	no	no	no	no	no	no	no	no	no	no	no	no	no	no	NA	NA	no	no	no	4	4	no	yes	yes	alert	=< 35øC oder >= 40øC	8	Piperacillin+Tazobactam	IV (parenteral)
H2-17-0652-1	Hospital 2	1982	35	2017-12-22	2017-12-22	2018-01-29	male	BLOOMY	Validation cohort	Staphylococcus aureus	no	cardiovascular	community acquired	gp1	survived	unknown	NA	NA	no	no	no	no	no	no	no	no	no	yes	no	no	no	no	no	no	NA	NA	no	no	no	1	4	no	no	no	alert	36,1-38,9øC	0	Flucloxacillin	IV (parenteral)
H2-17-0656-1	Hospital 2	1956	61	2017-12-26	2017-12-26	2017-12-28	female	BLOOMY	Training cohort	Staphylococcus aureus	no	no focus identified	community acquired	gp2	diseased	unknown	NA	NA	no	no	no	no	no	no	no	no	no	no	yes	unknown	no	no	no	no	NA	NA	no	no	no	2	3	yes	yes	no	comatose	36,1-38,9øC	8	Levofloxacin	IV (parenteral)
H2-17-0658-1	Hospital 2	1966	51	2017-12-26	2017-12-28	2018-01-11	female	BLOOMY	Training cohort	Staphylococcus aureus	no	cardiovascular	hospital acquired	gp2	survived	18.6851	54	170	no	no	no	no	no	no	no	yes	no	yes	no	no	no	no	no	no	NA	NA	no	no	no	1	5	no	no	no	alert	35,1-36,0øC or 39,0-39,9øC	1	Ampicillin+Sulbactam	IV (parenteral)
H2-17-0666-1	Hospital 2	1974	43	2017-12-30	2017-12-31	2018-01-11	male	BLOOMY	Training cohort	Staphylococcus aureus	no	cardiovascular	community acquired	gp1	survived	unknown	84	NA	no	no	no	no	no	no	no	no	no	no	no	no	no	no	no	no	NA	NA	no	no	no	1	1	no	no	no	alert	36,1-38,9øC	0	Cefazolin	IV (parenteral)
H2-18-0020-1	Hospital 2	1949	69	2018-01-07	2018-01-07	2018-01-20	male	BLOOMY	Training cohort	Staphylococcus aureus	no	cardiovascular	community acquired	gp1	survived	unknown	NA	NA	no	yes	no	no	no	no	no	no	no	no	yes	no	no	no	no	no	no	no	no	no	no	2	4	yes	no	no	alert	35,1-36,0øC or 39,0-39,9øC	3	Piperacillin+Tazobactam	IV (parenteral)
H2-18-0022-1	Hospital 2	1951	67	2018-01-08	2018-01-08	2018-01-19	male	BLOOMY	Training cohort	Staphylococcus aureus	no	skin and soft tissue	community acquired	gp1	survived	36.1313	121	183	no	no	no	no	no	no	no	no	no	no	yes	unknown	yes	no	no	no	NA	NA	no	no	no	2	5	no	no	no	alert	36,1-38,9øC	0	Piperacillin+Tazobactam	IV (parenteral)
H2-18-0026-1	Hospital 2	1962	56	2018-01-01	2018-01-11	2018-02-26	female	BLOOMY	Training cohort	Staphylococcus aureus	no	cardiovascular; intravasale foreign body	hospital acquired	gp2	survived	23.2912	78	183	no	no	no	no	no	no	no	yes	no	no	no	no	yes	no	no	no	no	no	no	no	no	1	4	yes	no	no	alert	36,1-38,9øC	2	Cefazolin	IV (parenteral)
H2-18-0029-1	Hospital 2	1985	33	2018-01-12	2018-01-12	2018-02-09	female	BLOOMY	Validation cohort	Staphylococcus aureus	no	cardiovascular	community acquired	gp1	survived	19.9573	57	169	no	no	no	no	no	no	no	no	no	no	no	no	no	no	no	no	no	no	no	no	no	1	1	no	no	no	alert	36,1-38,9øC	0	Piperacillin+Tazobactam	IV (parenteral)
H2-18-0038-1	Hospital 2	1935	83	2018-01-16	2018-01-16	2018-02-05	male	BLOOMY	Training cohort	Staphylococcus aureus	no	bone and joint	community acquired	gp2	survived	27.1616	96	188	no	no	no	no	no	no	no	no	yes	no	no	no	yes	no	no	no	no	no	no	no	no	4	7	no	no	no	alert	36,1-38,9øC	0	Piperacillin+Tazobactam	IV (parenteral)
H2-18-0062-1	Hospital 2	1979	39	2018-01-30	2018-01-30	2018-03-26	male	BLOOMY	Validation cohort	Staphylococcus aureus	no	skin and soft tissue	community acquired	gp1	survived	15.4422	54	187	no	no	no	no	no	no	no	no	no	no	no	no	yes	no	yes	no	yes	no	no	no	no	1	7	no	no	no	alert	36,1-38,9øC	0	Meropenem	IV (parenteral)
H2-18-0083-1	Hospital 2	1953	65	2018-02-02	2018-02-13	2018-02-17	female	BLOOMY	Validation cohort	Staphylococcus aureus	no	cardiovascular; intravasale foreign body	hospital acquired	gp3	diseased	16.937	45	163	no	no	no	no	no	no	no	no	no	no	no	no	no	no	yes	yes	no	no	no	no	no	2	10	no	no	no	disoriented	=< 35øC oder >= 40øC	3	Ciprofloxacin	IV (parenteral)
H2-18-0089-1	Hospital 2	1947	71	2018-02-16	2018-02-16	2018-03-07	male	BLOOMY	Training cohort	Staphylococcus aureus	no	no focus identified	community acquired	gp1	survived	23.5666	73	176	no	no	no	no	no	no	no	no	no	no	no	no	yes	no	no	no	no	no	no	no	no	3	5	no	no	no	disoriented	36,1-38,9øC	1	Ampicillin	IV (parenteral)
H2-18-0090-1	Hospital 2	1942	76	2018-02-13	2018-02-16	2018-02-27	female	BLOOMY	Training cohort	Staphylococcus aureus	no	no focus identified	hospital acquired	gp1	survived	21.3039	58	165	no	no	no	no	no	no	no	no	no	no	yes	no	yes	no	no	no	no	no	no	no	no	3	6	no	no	no	alert	36,1-38,9øC	0	Flucloxacillin	IV (parenteral)
H2-18-0100-1	Hospital 2	1937	81	2018-02-21	2018-02-21	2018-02-22	female	BLOOMY	Validation cohort	Staphylococcus aureus	no	cardiovascular	community acquired	gp2	diseased	23.4375	60	160	no	no	no	no	no	no	no	no	no	no	no	no	no	no	no	no	no	no	no	no	no	4	4	yes	yes	no	comatose	36,1-38,9øC	8	Ampicillin	IV (parenteral)
H2-18-0104-1	Hospital 2	1943	75	2018-02-22	2018-02-22	2018-03-22	male	BLOOMY	Training cohort	Staphylococcus aureus	no	respiratory	community acquired	gp1	survived	16.3265	50	175	no	no	yes	no	yes	yes	no	no	no	no	no	no	no	yes	no	no	no	no	no	no	no	3	8	yes	no	no	alert	36,1-38,9øC	2	Ampicillin+Sulbactam	IV (parenteral)
H2-18-0107-1	Hospital 2	1961	57	2018-02-23	2018-02-23	2018-02-28	male	BLOOMY	Training cohort	Staphylococcus aureus	no	urogenital	community acquired	gp1	survived	26.7299	80	173	no	no	no	no	no	no	no	no	no	no	no	no	no	no	no	no	no	no	no	no	no	1	1	no	no	no	alert	36,1-38,9øC	0	Linezolid	oral
H2-18-0108-1	Hospital 2	1952	66	2018-02-18	2018-02-23	2018-04-05	female	BLOOMY	Training cohort	Staphylococcus aureus	no	bone and joint; foreign body	hospital acquired	gp1	survived	31.25	80	160	no	no	no	no	yes	no	yes	no	no	no	no	no	no	no	no	no	no	no	no	no	no	2	4	yes	no	no	alert	35,1-36,0øC or 39,0-39,9øC	3	Piperacillin+Tazobactam	IV (parenteral)
H2-18-0112-1	Hospital 2	1936	82	2018-01-23	2018-03-02	2018-03-26	male	BLOOMY	Validation cohort	Staphylococcus aureus	no	skin and soft tissue	hospital acquired	gp1	survived	21.1389	64	174	no	no	no	no	yes	no	no	no	no	no	no	no	no	yes	no	no	no	no	no	no	yes	4	7	no	no	no	alert	36,1-38,9øC	0	Piperacillin+Tazobactam	IV (parenteral)
H2-18-0119-1	Hospital 2	1942	76	2018-02-26	2018-03-05	2018-03-10	male	BLOOMY	Validation cohort	Staphylococcus aureus	yes	cardiovascular; intravasale foreign body	hospital acquired	gp1	diseased	unknown	99	NA	no	yes	yes	no	no	yes	no	yes	no	no	no	yes	yes	no	no	no	no	no	no	no	no	3	11	yes	no	no	disoriented	35,1-36,0øC or 39,0-39,9øC	4	Piperacillin+Tazobactam	IV (parenteral)
H2-18-0124-1	Hospital 2	1958	60	2018-03-07	2018-03-07	2018-03-17	male	BLOOMY	Training cohort	Staphylococcus aureus	no	respiratory	community acquired	gp3	diseased	23.8754	69	170	no	no	yes	no	no	yes	no	no	no	no	no	no	no	no	no	no	no	no	no	no	no	2	4	yes	yes	no	comatose	36,1-38,9øC	8	Ampicillin+Sulbactam	IV (parenteral)
H2-18-0141-1	Hospital 2	1997	21	2018-03-17	2018-03-17	2018-04-02	female	BLOOMY	Validation cohort	Staphylococcus aureus	no	urogenital	community acquired	gp2	survived	19.3792	58	173	no	no	no	no	no	no	no	no	no	no	no	no	no	no	yes	no	no	no	no	no	no	1	3	no	no	no	alert	35,1-36,0øC or 39,0-39,9øC	1	Piperacillin+Tazobactam	IV (parenteral)
H2-18-0144-1	Hospital 2	1947	71	2018-03-18	2018-03-18	2018-04-06	female	BLOOMY	Validation cohort	Staphylococcus aureus	no	respiratory	community acquired	gp1	survived	35.0112	106	174	no	no	no	yes	yes	no	no	no	no	no	no	no	no	yes	no	no	no	no	no	no	no	3	7	yes	no	no	disoriented	36,1-38,9øC	3	Ampicillin+Sulbactam	IV (parenteral)
H2-18-0145-1	Hospital 2	1944	74	2018-03-18	2018-03-18	2018-03-27	male	BLOOMY	Training cohort	Staphylococcus aureus	no	skin and soft tissue	community acquired	gp1	diseased	27.4717	92	183	yes	no	no	no	no	no	no	no	no	no	no	no	no	no	yes	no	yes	no	no	no	no	3	8	no	no	no	alert	36,1-38,9øC	0	Meropenem	IV (parenteral)
H2-18-0150-1	Hospital 2	1957	61	2018-03-21	2018-03-21	2018-04-16	male	BLOOMY	Validation cohort	Staphylococcus aureus	no	skin and soft tissue	community acquired	gp1	survived	30.8642	100	180	no	no	no	no	no	no	no	no	no	no	no	yes	no	no	no	no	no	no	no	no	no	2	4	unknown	no	no	alert	35,1-36,0øC or 39,0-39,9øC	1	other antibiotic substance	IV (parenteral)
H2-18-0161-1	Hospital 2	1953	65	2018-03-28	2018-03-28	2018-05-08	female	BLOOMY	Training cohort	Staphylococcus aureus	yes	cardiovascular; intravasale foreign body	community acquired	gp1	diseased	20.7008	55	163	yes	unknown	no	no	no	no	no	no	no	no	no	yes	yes	no	no	no	no	no	no	no	no	2	7	yes	no	no	alert	36,1-38,9øC	2	Piperacillin+Tazobactam	IV (parenteral)
H2-18-0164-1	Hospital 2	1956	62	2018-03-30	2018-03-30	2018-04-15	female	BLOOMY	Training cohort	Staphylococcus aureus	no	skin and soft tissue	community acquired	gp1	diseased	32.1402	110	185	no	no	no	no	no	no	no	no	no	no	yes	no	yes	no	no	no	no	no	no	no	no	2	5	yes	no	no	disoriented	35,1-36,0øC or 39,0-39,9øC	4	Meropenem	IV (parenteral)
H2-18-0177-1	Hospital 2	1967	51	2018-04-02	2018-04-02	2018-04-30	male	BLOOMY	Training cohort	Staphylococcus aureus	no	cardiovascular; intravasale foreign body	community acquired	gp1	survived	26.3036	91	186	no	no	no	no	no	no	no	no	no	no	no	no	yes	no	no	no	no	no	no	no	no	1	3	no	no	no	alert	35,1-36,0øC or 39,0-39,9øC	1	Meropenem	IV (parenteral)
H2-18-0178-1	Hospital 2	1944	74	2018-03-29	2018-04-02	2018-04-11	female	BLOOMY	Validation cohort	Staphylococcus aureus	no	cardiovascular	hospital acquired	gp1	survived	20.061	52	161	no	no	no	no	no	no	no	no	no	no	no	no	no	no	no	no	no	no	no	no	yes	3	3	no	no	no	alert	=< 35øC oder >= 40øC	2	Ciprofloxacin	IV (parenteral)
H2-18-0183-1	Hospital 2	1994	24	2018-03-17	2018-04-05	2018-06-21	female	BLOOMY	Training cohort	Staphylococcus aureus	no	cardiovascular; intravasale foreign body	hospital acquired	gp1	diseased	16.609	48	170	no	no	no	no	no	no	no	no	no	no	no	no	no	no	no	no	no	no	no	no	no	1	1	no	no	no	alert	36,1-38,9øC	0	Piperacillin+Tazobactam	IV (parenteral)
H2-18-0198-1	Hospital 2	1929	89	2018-04-15	2018-04-15	2018-04-26	female	BLOOMY	Validation cohort	Staphylococcus aureus	no	urogenital	community acquired	gp3	survived	unknown	NA	NA	no	no	no	no	no	no	no	no	no	no	no	no	no	no	yes	no	no	no	no	no	no	4	6	no	no	no	alert	36,1-38,9øC	0	Meropenem	IV (parenteral)
H2-18-0203-1	Hospital 2	1948	70	2018-04-16	2018-04-16	2018-07-09	male	BLOOMY	Training cohort	Staphylococcus aureus	no	bone and joint	community acquired	gp1	survived	32.9796	101	175	no	no	no	no	no	no	no	no	no	no	no	no	yes	no	no	no	no	no	no	no	no	3	5	no	no	no	alert	36,1-38,9øC	0	Piperacillin+Tazobactam	IV (parenteral)
H2-18-0220-1	Hospital 2	1950	68	2018-04-22	2018-04-25	2018-05-12	male	BLOOMY	Training cohort	Staphylococcus aureus	no	urogenital	hospital acquired	gp3	survived	19.9251	66	182	no	no	yes	no	no	no	no	no	no	no	no	no	yes	no	yes	no	no	no	no	no	no	2	7	no	no	no	alert	36,1-38,9øC	0	Rifampicin	oral
H2-18-0222-1	Hospital 2	1938	80	2018-04-20	2018-04-26	2018-05-13	male	BLOOMY	Validation cohort	Staphylococcus aureus	no	cardiovascular; intravasale foreign body	hospital acquired	gp2	survived	28.3874	93	181	no	no	yes	no	no	no	no	no	no	no	no	yes	no	no	yes	yes	no	no	no	no	no	4	15	no	no	no	alert	35,1-36,0øC or 39,0-39,9øC	1	Cefazolin	IV (parenteral)
H2-18-0229-1	Hospital 2	1944	74	2018-05-02	2018-05-02	2018-05-16	female	BLOOMY	Training cohort	Staphylococcus aureus	no	cerebral	community acquired	gp2	survived	21.2245	65	175	no	no	no	no	no	no	no	no	no	no	no	no	no	no	no	no	no	no	no	no	no	3	3	no	no	no	alert	36,1-38,9øC	0	Ampicillin	IV (parenteral)
H2-18-0246-1	Hospital 2	1963	55	2018-05-09	2018-05-10	2018-08-02	female	BLOOMY	Training cohort	Staphylococcus aureus	no	respiratory	community acquired	gp1	survived	23.1911	55	154	yes	yes	no	no	no	no	no	no	no	no	no	no	no	no	yes	unknown	no	no	no	no	no	1	5	yes	yes	no	alert	35,1-36,0øC or 39,0-39,9øC	5	Ampicillin+Sulbactam	IV (parenteral)
H2-18-0247-1	Hospital 2	1939	79	2018-05-10	2018-05-10	2018-06-06	male	BLOOMY	Validation cohort	Staphylococcus aureus	no	cardiovascular; intravasale foreign body	community acquired	gp3	survived	26.1493	81	176	no	yes	no	no	no	no	no	no	no	no	no	no	no	no	no	no	no	no	no	no	no	3	4	yes	no	no	alert	36,1-38,9øC	2	Flucloxacillin	IV (parenteral)
H2-18-0255-1	Hospital 2	1949	69	2018-05-04	2018-05-15	2018-06-15	female	BLOOMY	Training cohort	Staphylococcus aureus	yes	bone and joint	hospital acquired	gp2	survived	unknown	49	NA	no	no	no	no	no	no	no	no	no	no	no	no	no	yes	no	no	no	no	no	no	no	2	4	no	no	no	alert	35,1-36,0øC or 39,0-39,9øC	1	Linezolid	oral
H2-18-0261-1	Hospital 2	1929	89	2018-05-17	2018-05-17	2018-05-18	female	BLOOMY	Validation cohort	Staphylococcus aureus	no	respiratory	community acquired	gp1	diseased	25.2363	63	158	no	no	no	no	yes	no	no	no	no	no	yes	no	no	yes	no	no	no	no	no	no	no	4	8	no	no	no	comatose	36,1-38,9øC	4	Piperacillin+Tazobactam	IV (parenteral)
H2-18-0269-1	Hospital 2	1949	69	2018-05-18	2018-05-18	2018-06-11	male	BLOOMY	Training cohort	Staphylococcus aureus	no	respiratory	community acquired	gp1	diseased	25.0574	83	182	no	yes	yes	no	no	no	no	no	no	no	no	no	no	no	no	no	no	no	no	no	no	2	4	no	no	no	disoriented	36,1-38,9øC	1	Piperacillin+Tazobactam	IV (parenteral)
H2-18-0270-1	Hospital 2	1962	56	2018-05-19	2018-05-19	2018-06-12	male	BLOOMY	Training cohort	Staphylococcus aureus	no	bone and joint	community acquired	gp2	survived	22.8774	80	187	no	no	no	no	no	no	no	no	no	no	no	no	no	no	no	no	no	no	no	no	no	1	1	yes	no	no	alert	36,1-38,9øC	2	Flucloxacillin	IV (parenteral)
H2-18-0292-1	Hospital 2	1985	33	2018-05-29	2018-05-30	2018-06-25	female	BLOOMY	Training cohort	Staphylococcus aureus	no	bone and joint	community acquired	gp1	survived	20.5499	58	168	no	no	no	no	no	no	no	no	no	no	no	no	no	no	no	no	no	no	no	no	no	1	1	no	no	no	alert	36,1-38,9øC	0	Flucloxacillin	IV (parenteral)
H2-18-0324-1	Hospital 2	1960	58	2018-06-20	2018-06-20	2018-08-02	male	BLOOMY	Training cohort	Staphylococcus aureus	no	skin and soft tissue	community acquired	gp1	survived	29.6045	108	191	no	yes	no	no	no	no	no	no	no	no	no	no	no	no	no	no	no	no	no	no	no	1	2	unknown	no	no	alert	36,1-38,9øC	0	Erythromycin	IV (parenteral)
H2-18-0331-1	Hospital 2	1964	54	2018-06-03	2018-06-25	2018-08-27	male	BLOOMY	Validation cohort	Staphylococcus aureus	no	cardiovascular; intravasale foreign body	hospital acquired	gp1	survived	26.1224	80	175	no	yes	no	no	yes	no	no	no	no	no	no	no	no	no	no	no	no	no	no	no	no	1	3	no	no	no	alert	36,1-38,9øC	0	Rifampicin	IV (parenteral)
H2-18-0334-1	Hospital 2	1929	89	2018-06-26	2018-06-26	2018-07-09	male	BLOOMY	Training cohort	Staphylococcus aureus	no	no focus identified	community acquired	gp1	survived	25.7276	77	173	no	no	no	no	no	no	no	no	no	no	no	no	no	no	no	no	no	no	no	no	no	4	4	no	no	no	alert	35,1-36,0øC or 39,0-39,9øC	1	Vancomycin	IV (parenteral)
H2-18-0336-1	Hospital 2	1972	46	2018-06-27	2018-06-27	2018-07-31	male	BLOOMY	Training cohort	Staphylococcus aureus	no	cardiovascular	community acquired	gp1	survived	18.3129	62	184	no	no	no	no	no	no	no	no	no	no	no	no	no	no	no	no	no	no	no	no	no	1	1	no	no	no	alert	36,1-38,9øC	0	Flucloxacillin	IV (parenteral)
H2-18-0341-1	Hospital 2	1953	65	2018-06-20	2018-06-29	2018-07-23	male	BLOOMY	Training cohort	Staphylococcus aureus	no	bone and joint	hospital acquired	gp1	survived	29.6084	97	181	no	no	no	no	no	no	no	no	no	no	no	no	no	no	yes	unknown	no	no	no	no	no	2	4	no	no	no	alert	36,1-38,9øC	0	Rifampicin	oral
H2-18-0348-1	Hospital 2	1955	63	2018-06-12	2018-07-04	2018-07-11	male	BLOOMY	Training cohort	Staphylococcus aureus	no	cardiovascular; intravasale foreign body	hospital acquired	gp3	diseased	25.1808	78	176	no	no	no	no	no	no	no	no	no	no	no	no	yes	no	yes	unknown	no	no	no	no	no	2	6	unknown	no	no	disoriented	36,1-38,9øC	1	Doxycyclin	oral
H2-18-0352-1	Hospital 2	1942	76	2018-06-22	2018-07-05	2018-07-19	male	BLOOMY	Training cohort	Staphylococcus aureus	no	cardiovascular; intravasale foreign body	hospital acquired	gp1	survived	23.1481	75	180	no	yes	no	no	no	yes	no	no	no	no	no	no	no	no	yes	yes	no	no	no	no	no	3	13	yes	no	no	alert	36,1-38,9øC	2	Penicillin G	IV (parenteral)
H2-18-0353-1	Hospital 2	1944	74	2018-07-05	2018-07-05	2018-08-06	male	BLOOMY	Training cohort	Staphylococcus aureus	no	skin and soft tissue	community acquired	gp1	survived	28.0428	82	171	no	no	yes	no	no	no	no	no	no	no	no	yes	no	no	yes	yes	no	no	no	no	no	3	14	no	no	no	alert	36,1-38,9øC	0	Levofloxacin	IV (parenteral)
H2-18-0385-1	Hospital 2	1962	56	2018-07-13	2018-07-17	2018-07-30	male	BLOOMY	Training cohort	Staphylococcus aureus	no	skin and soft tissue	hospital acquired	gp2	survived	22.7244	72	178	no	no	no	no	no	no	no	no	no	no	yes	no	no	no	no	no	no	no	no	no	no	1	2	no	no	no	alert	36,1-38,9øC	0	Flucloxacillin	IV (parenteral)
H2-18-0403-1	Hospital 2	1949	69	2018-07-29	2018-07-29	2018-08-13	male	BLOOMY	Training cohort	Staphylococcus aureus	no	skin and soft tissue	community acquired	gp2	survived	37.1255	115	176	no	no	yes	no	no	no	no	no	no	no	no	yes	no	no	no	no	no	no	no	no	no	2	5	no	no	no	alert	35,1-36,0øC or 39,0-39,9øC	1	Cefazolin	IV (parenteral)
H2-18-0404-1	Hospital 2	1936	82	2018-07-28	2018-07-29	2018-08-10	female	BLOOMY	Training cohort	Staphylococcus aureus	no	cardiovascular	community acquired	gp1	diseased	23.5883	65	166	no	yes	no	no	no	no	no	no	no	no	no	no	no	no	no	no	no	no	no	no	yes	4	5	yes	yes	no	comatose	36,1-38,9øC	8	Piperacillin+Tazobactam	IV (parenteral)
H2-18-0412-1	Hospital 2	1940	78	2018-08-01	2018-08-01	2018-09-08	male	BLOOMY	Training cohort	Staphylococcus aureus	no	cardiovascular	community acquired	gp2	diseased	35.2617	96	165	no	no	no	no	no	no	no	no	no	no	yes	no	no	no	yes	no	no	no	no	no	no	3	6	yes	no	no	unknown	36,1-38,9øC	2	Piperacillin+Tazobactam	IV (parenteral)
H2-18-0416-1	Hospital 2	1944	74	2018-08-01	2018-08-02	2018-08-29	female	BLOOMY	Training cohort	Staphylococcus aureus	no	bone and joint; foreign body	community acquired	gp1	survived	19.9219	51	160	no	no	no	no	no	yes	yes	no	no	no	no	no	no	no	no	no	no	no	no	no	yes	3	5	yes	no	no	alert	36,1-38,9øC	2	Flucloxacillin	IV (parenteral)
H2-18-0418-1	Hospital 2	1953	65	2018-08-02	2018-08-02	2018-08-27	male	BLOOMY	Training cohort	Staphylococcus aureus	yes	bone and joint	community acquired	gp1	survived	31.6001	99	177	no	yes	yes	no	no	yes	no	no	no	no	no	yes	no	no	no	no	no	no	no	no	no	2	7	no	no	no	alert	36,1-38,9øC	0	Vancomycin	IV (parenteral)
H2-18-0420-1	Hospital 2	1941	77	2018-07-12	2018-08-03	2018-08-15	male	BLOOMY	Validation cohort	Staphylococcus aureus	no	cardiovascular	hospital acquired	gp1	survived	unknown	NA	NA	no	no	no	no	no	no	no	no	no	no	no	no	no	no	yes	yes	no	no	no	no	no	3	11	no	no	no	alert	=< 35øC oder >= 40øC	2	Piperacillin+Tazobactam	IV (parenteral)
H2-18-0433-1	Hospital 2	1953	65	2018-08-09	2018-08-10	2018-08-30	female	BLOOMY	Validation cohort	Staphylococcus aureus	no	skin and soft tissue	community acquired	gp1	survived	29.6084	97	181	no	no	no	no	no	no	no	no	no	no	no	no	no	no	no	no	no	no	no	no	no	2	2	no	no	no	alert	36,1-38,9øC	0	Rifampicin	IV (parenteral)
H2-18-0435-1	Hospital 2	1943	75	2018-08-11	2018-08-11	2018-10-01	male	BLOOMY	Validation cohort	Staphylococcus aureus	no	cardiovascular; intravasale foreign body	community acquired	gp1	survived	22.7903	69	174	no	no	no	no	no	no	no	no	no	no	no	no	no	no	yes	no	no	no	no	no	no	3	5	no	no	no	disoriented	36,1-38,9øC	1	Piperacillin+Tazobactam	IV (parenteral)
H2-18-0439-1	Hospital 2	1961	57	2018-08-11	2018-08-11	2018-09-06	female	BLOOMY	Training cohort	Staphylococcus aureus	no	cardiovascular; intravasale foreign body	community acquired	gp2	diseased	25.5036	79	176	no	no	no	no	no	no	no	no	no	yes	yes	no	no	no	yes	yes	no	no	no	yes	no	1	13	no	no	no	alert	36,1-38,9øC	0	Piperacillin+Tazobactam	IV (parenteral)
H2-18-0441-1	Hospital 2	1957	61	2018-08-01	2018-08-13	2018-08-30	male	BLOOMY	Training cohort	Staphylococcus aureus	no	cardiovascular; intravasale foreign body	hospital acquired	gp1	survived	24.5435	84	185	no	no	no	no	no	no	no	no	no	no	no	no	no	no	no	no	no	no	no	no	no	2	2	no	no	no	alert	35,1-36,0øC or 39,0-39,9øC	1	Flucloxacillin	IV (parenteral)
H2-18-0443-1	Hospital 2	1963	55	2018-08-13	2018-08-13	2018-08-28	male	BLOOMY	Validation cohort	Staphylococcus aureus	no	cardiovascular; intravasale foreign body	community acquired	gp1	survived	24.1115	73	174	no	no	no	no	no	no	no	no	no	no	yes	no	no	no	yes	no	no	no	no	no	no	1	4	no	no	no	alert	36,1-38,9øC	0	Piperacillin+Tazobactam	IV (parenteral)
H2-18-0446-1	Hospital 2	1951	67	2018-08-15	2018-08-15	2018-08-24	female	BLOOMY	Training cohort	Staphylococcus aureus	no	bone and joint	community acquired	gp1	survived	20.1348	49	156	no	no	no	no	no	no	no	no	no	no	no	no	no	no	no	no	no	no	no	no	no	2	2	yes	yes	no	alert	36,1-38,9øC	4	Cefazolin	IV (parenteral)
H2-18-0447-1	Hospital 2	1965	53	2018-08-15	2018-08-15	2018-09-11	female	BLOOMY	Training cohort	Staphylococcus aureus	no	skin and soft tissue	community acquired	gp1	survived	35.2617	96	165	no	no	no	no	no	no	no	no	no	yes	no	yes	no	no	no	no	no	no	no	no	no	1	6	yes	no	no	alert	36,1-38,9øC	2	Piperacillin+Tazobactam	IV (parenteral)
H2-18-0450-1	Hospital 2	1952	66	2018-08-17	2018-08-17	2018-09-07	male	BLOOMY	Validation cohort	Staphylococcus aureus	no	skin and soft tissue	community acquired	gp1	survived	32.2831	100	176	no	no	no	no	no	no	no	no	no	no	no	yes	no	no	yes	no	no	no	no	no	no	2	6	no	no	no	alert	=< 35øC oder >= 40øC	2	Ampicillin	IV (parenteral)
H2-18-0452-1	Hospital 2	1970	48	2018-08-17	2018-08-17	2018-08-21	female	BLOOMY	Validation cohort	Staphylococcus aureus	no	respiratory	community acquired	gp3	diseased	26.4463	72	165	no	no	no	no	no	no	no	no	no	no	no	no	no	no	yes	yes	no	no	no	no	no	1	9	yes	no	no	alert	36,1-38,9øC	2	Piperacillin+Tazobactam	IV (parenteral)
H2-18-0454-1	Hospital 2	1963	55	2018-08-18	2018-08-18	2018-08-31	female	BLOOMY	Training cohort	Staphylococcus aureus	no	no focus identified	community acquired	gp3	diseased	23.6244	62	162	no	no	no	no	no	no	no	no	no	yes	no	no	no	no	no	no	no	no	no	no	no	1	4	yes	no	no	disoriented	35,1-36,0øC or 39,0-39,9øC	4	Ceftriaxon	IV (parenteral)
H2-18-0457-1	Hospital 2	1957	61	2018-08-20	2018-08-20	2018-09-09	male	BLOOMY	Training cohort	Staphylococcus aureus	no	skin and soft tissue	community acquired	gp1	survived	33.3137	119	189	no	no	yes	no	no	no	no	no	no	no	no	yes	no	no	no	no	no	no	no	no	no	2	5	no	no	no	alert	36,1-38,9øC	0	Cefuroxim-Natrium	IV (parenteral)
H2-18-0458-1	Hospital 2	1962	56	2018-08-21	2018-08-22	2018-08-30	male	BLOOMY	Training cohort	Staphylococcus aureus	no	bone and joint; foreign body	community acquired	gp1	diseased	29.321	95	180	no	no	no	no	no	no	no	no	no	yes	no	no	no	no	no	no	no	no	no	no	no	1	4	yes	no	no	disoriented	36,1-38,9øC	3	Linezolid	IV (parenteral)
H2-18-0460-1	Hospital 2	1938	80	2018-08-23	2018-08-23	2018-08-27	female	BLOOMY	Training cohort	Staphylococcus aureus	no	cardiovascular; intravasale foreign body	community acquired	gp1	diseased	21.9138	48	148	no	no	no	no	no	no	yes	no	no	no	no	no	no	no	no	no	no	no	no	no	no	4	5	yes	yes	no	alert	36,1-38,9øC	4	Cefazolin	IV (parenteral)
H2-18-0464-1	Hospital 2	1960	58	2018-08-16	2018-08-26	2018-08-31	female	BLOOMY	Training cohort	Staphylococcus aureus	no	cardiovascular; intravasale foreign body	hospital acquired	gp2	survived	16.2982	46	168	no	no	no	no	no	no	no	no	no	no	no	no	no	no	yes	unknown	no	no	no	no	no	1	3	yes	no	no	alert	36,1-38,9øC	2	Piperacillin+Tazobactam	IV (parenteral)
H2-18-0466-1	Hospital 2	1991	27	2018-08-16	2018-08-27	2018-09-17	male	BLOOMY	Training cohort	Staphylococcus aureus	no	skin and soft tissue	hospital acquired	gp1	survived	23.3844	66	168	no	no	no	no	no	no	no	no	no	no	no	no	no	no	yes	unknown	no	no	no	no	no	1	3	no	no	no	alert	36,1-38,9øC	0	Vancomycin	oral
H2-18-0479-1	Hospital 2	1932	86	2018-08-28	2018-09-04	2018-09-15	male	BLOOMY	Training cohort	Staphylococcus aureus	no	skin and soft tissue	hospital acquired	gp3	survived	27.6095	77	167	no	no	no	no	no	no	no	no	no	no	no	no	no	no	yes	no	no	no	no	no	no	4	6	no	no	no	alert	35,1-36,0øC or 39,0-39,9øC	1	Piperacillin+Tazobactam	IV (parenteral)
H2-18-0480-1	Hospital 2	1938	80	2018-09-04	2018-09-05	2018-09-22	female	BLOOMY	Training cohort	Staphylococcus aureus	no	bone and joint	community acquired	gp1	diseased	unknown	NA	NA	no	yes	no	no	no	no	yes	no	no	no	yes	no	no	no	no	no	no	no	no	no	no	4	7	no	no	no	alert	36,1-38,9øC	0	Piperacillin+Tazobactam	IV (parenteral)
H2-18-0488-1	Hospital 2	1965	53	2018-09-09	2018-09-10	2018-09-10	male	BLOOMY	Training cohort	Staphylococcus aureus	no	no focus identified	community acquired	gp3	diseased	30.8642	100	180	no	yes	no	no	no	no	no	no	no	no	no	no	yes	no	no	no	no	no	no	no	no	1	4	yes	yes	yes	comatose	35,1-36,0øC or 39,0-39,9øC	13	Meropenem	IV (parenteral)
H2-18-0490-1	Hospital 2	1983	35	2018-09-12	2018-09-12	2018-09-20	female	BLOOMY	Training cohort	Staphylococcus aureus	no	cardiovascular; intravasale foreign body	community acquired	gp1	survived	27.7008	64	152	no	no	no	no	no	no	no	no	yes	no	no	no	no	no	no	no	no	no	no	no	no	1	2	no	no	no	alert	36,1-38,9øC	0	Metronidazol	IV (parenteral)
H2-18-0506-1	Hospital 2	1943	75	2018-09-18	2018-09-18	2018-10-15	male	BLOOMY	Validation cohort	Staphylococcus aureus	no	abdominal	community acquired	gp1	survived	35.0765	99	168	no	no	yes	no	no	no	no	no	no	yes	no	no	yes	no	no	no	no	no	no	no	no	3	9	no	no	no	alert	36,1-38,9øC	0	Piperacillin+Tazobactam	IV (parenteral)
H2-18-0507-1	Hospital 2	1953	65	2018-09-05	2018-09-18	2018-10-04	male	BLOOMY	Validation cohort	Staphylococcus aureus	no	cardiovascular; intravasale foreign body	hospital acquired	gp2	survived	19.8839	63	178	no	no	no	no	no	no	no	no	no	no	no	no	no	no	no	no	no	no	no	no	no	2	2	no	no	no	alert	36,1-38,9øC	0	Flucloxacillin	IV (parenteral)
H2-18-0508-1	Hospital 2	1957	61	2018-08-22	2018-09-20	2018-10-17	female	BLOOMY	Training cohort	Staphylococcus aureus	no	abdominal	hospital acquired	gp2	survived	25.3906	65	160	no	no	no	no	yes	yes	no	no	yes	no	yes	no	no	no	yes	no	no	no	no	no	no	2	8	no	no	no	alert	35,1-36,0øC or 39,0-39,9øC	1	Meropenem	IV (parenteral)
H2-18-0511-1	Hospital 2	1948	70	2018-09-20	2018-09-20	2018-11-06	male	BLOOMY	Validation cohort	Staphylococcus aureus	yes	cardiovascular; intravasale foreign body	community acquired	gp2	survived	unknown	NA	NA	no	no	no	no	yes	no	no	no	no	no	no	no	no	no	no	no	no	no	no	no	no	3	4	no	no	no	alert	36,1-38,9øC	0	Linezolid	IV (parenteral)
H2-18-0526-1	Hospital 2	1954	64	2018-09-26	2018-09-26	2018-11-12	male	BLOOMY	Training cohort	Staphylococcus aureus	no	skin and soft tissue	community acquired	gp1	survived	26.5832	90	184	no	no	no	no	no	no	no	no	no	no	no	yes	no	no	no	no	no	no	no	no	no	2	4	no	no	no	disoriented	36,1-38,9øC	1	Ampicillin+Sulbactam	IV (parenteral)
H2-18-0529-1	Hospital 2	1965	53	2018-09-27	2018-09-27	2018-10-27	female	BLOOMY	Training cohort	Staphylococcus aureus	no	skin and soft tissue	community acquired	gp1	diseased	28.578	75	162	no	no	no	no	no	no	no	no	no	no	no	yes	no	no	no	no	no	no	no	no	no	1	3	no	no	no	alert	36,1-38,9øC	0	Piperacillin+Tazobactam	IV (parenteral)
H2-18-0540-1	Hospital 2	1944	74	2018-09-20	2018-10-03	2018-10-19	male	BLOOMY	Training cohort	Staphylococcus aureus	no	abdominal	hospital acquired	gp1	survived	23.04	73	178	no	no	no	no	no	no	no	no	no	no	yes	no	no	no	yes	no	no	no	no	no	no	3	6	no	no	no	alert	35,1-36,0øC or 39,0-39,9øC	1	Piperacillin+Tazobactam	IV (parenteral)
H2-18-0547-1	Hospital 2	1936	82	2018-10-03	2018-10-05	2018-10-29	female	BLOOMY	Training cohort	Staphylococcus aureus	no	cardiovascular	hospital acquired	gp1	diseased	22.5827	60	163	no	no	no	no	no	no	no	no	no	no	no	no	no	no	no	no	no	no	no	no	no	4	4	yes	yes	no	comatose	35,1-36,0øC or 39,0-39,9øC	9	Daptomycin	IV (parenteral)
H2-18-0555-1	Hospital 2	1933	85	2018-10-12	2018-10-12	2018-10-13	female	BLOOMY	Training cohort	Staphylococcus aureus	no	cardiovascular	community acquired	gp2	diseased	unknown	NA	NA	no	no	no	no	yes	no	no	no	no	no	yes	no	no	yes	no	no	no	no	no	no	no	4	8	no	no	no	disoriented	36,1-38,9øC	1	Ampicillin	IV (parenteral)
H2-18-0556-1	Hospital 2	1947	71	2018-10-12	2018-10-12	2018-11-23	male	BLOOMY	Validation cohort	Staphylococcus aureus	no	cardiovascular	community acquired	gp1	survived	26.5285	85	179	no	no	no	no	yes	no	no	no	no	no	no	no	no	no	no	no	no	no	no	no	no	3	4	no	no	no	alert	36,1-38,9øC	0	Flucloxacillin	IV (parenteral)
H2-18-0567-1	Hospital 2	1988	30	2018-10-13	2018-10-18	2018-11-02	female	BLOOMY	Training cohort	Staphylococcus aureus	no	cardiovascular	hospital acquired	gp2	survived	18.3768	55	173	no	no	no	no	no	no	no	no	no	no	no	no	no	no	no	no	no	no	no	no	no	1	1	no	no	no	alert	35,1-36,0øC or 39,0-39,9øC	1	Flucloxacillin	IV (parenteral)
H2-18-0593-1	Hospital 2	1959	59	2018-11-02	2018-11-06	2018-11-23	female	BLOOMY	Validation cohort	Staphylococcus aureus	no	cardiovascular; intravasale foreign body	hospital acquired	gp1	survived	22.3214	63	168	no	no	no	no	no	no	no	no	no	no	no	no	no	no	yes	no	no	no	no	no	no	1	3	no	no	no	alert	36,1-38,9øC	0	other antibiotic substance	IV (parenteral)
H2-18-0599-1	Hospital 2	1947	71	2018-11-08	2018-11-08	2018-11-21	male	BLOOMY	Training cohort	Staphylococcus aureus	no	bone and joint	NA	gp2	survived	unknown	NA	NA	no	no	no	no	no	no	no	no	no	no	yes	no	no	no	no	no	no	no	no	no	no	3	4	no	no	no	alert	36,1-38,9øC	0	Moxifloxacin	IV (parenteral)
H2-18-0600-1	Hospital 2	1949	69	2018-11-08	2018-11-08	2018-12-09	female	BLOOMY	Validation cohort	Staphylococcus aureus	no	respiratory	community acquired	gp1	diseased	unknown	NA	NA	no	no	no	no	no	yes	no	no	no	no	no	no	no	no	no	no	no	no	no	no	no	2	3	no	no	no	alert	36,1-38,9øC	0	Ampicillin+Sulbactam	IV (parenteral)
H2-18-0606-1	Hospital 2	1950	68	2018-11-05	2018-11-09	2018-11-26	male	BLOOMY	Validation cohort	Staphylococcus aureus	no	urogenital	hospital acquired	gp1	diseased	23.7022	82	186	no	no	no	no	no	no	no	no	no	no	yes	no	no	no	yes	no	no	no	no	no	no	2	5	no	no	no	disoriented	36,1-38,9øC	1	Flucloxacillin	IV (parenteral)
H2-18-0608-1	Hospital 2	1946	72	2018-11-07	2018-11-10	2018-12-17	male	BLOOMY	Training cohort	Staphylococcus aureus	no	cardiovascular; intravasale foreign body	hospital acquired	gp2	survived	30.9917	96	176	no	no	no	no	no	yes	no	unknown	no	no	no	yes	no	no	yes	yes	no	no	no	no	no	3	14	no	no	no	alert	36,1-38,9øC	0	Piperacillin+Tazobactam	IV (parenteral)
H2-18-0609-1	Hospital 2	1940	78	2018-10-29	2018-11-11	2018-12-21	female	BLOOMY	Validation cohort	Staphylococcus aureus	no	cardiovascular	hospital acquired	gp3	survived	unknown	50	NA	yes	yes	yes	no	no	no	no	no	no	no	no	no	yes	no	no	no	no	no	no	no	no	3	8	no	no	no	alert	35,1-36,0øC or 39,0-39,9øC	1	Ceftriaxon	IV (parenteral)
H2-18-0621-1	Hospital 2	1957	61	2018-11-20	2018-11-20	2018-12-13	male	BLOOMY	Validation cohort	Staphylococcus aureus	no	cardiovascular; intravasale foreign body	hospital acquired	gp2	survived	30.0232	93	176	no	no	no	no	no	no	no	no	no	no	no	no	no	no	yes	no	no	no	no	no	no	2	4	no	no	no	alert	36,1-38,9øC	0	Ampicillin+Sulbactam	IV (parenteral)
H2-18-0627-1	Hospital 2	1944	74	2018-11-21	2018-11-21	2018-12-06	male	BLOOMY	Training cohort	Staphylococcus aureus	no	skin and soft tissue	community acquired	gp1	survived	28.7268	84	171	yes	no	yes	no	no	no	no	no	no	no	no	yes	no	no	yes	no	no	no	no	no	no	3	9	no	no	no	alert	36,1-38,9øC	0	Moxifloxacin	IV (parenteral)
H2-18-0630-1	Hospital 2	1972	46	2018-11-22	2018-11-22	2018-11-29	male	BLOOMY	Training cohort	Staphylococcus aureus	no	cardiovascular; intravasale foreign body	community acquired	gp2	diseased	41.3223	128	176	no	no	no	no	no	no	no	no	no	no	no	no	yes	no	no	no	no	no	no	no	no	1	3	no	no	no	alert	36,1-38,9øC	0	Rifampicin	IV (parenteral)
H2-18-0639-1	Hospital 2	1935	83	2018-11-26	2018-11-26	2018-11-30	female	BLOOMY	Validation cohort	Staphylococcus aureus	no	cardiovascular; intravasale foreign body	community acquired	gp1	diseased	unknown	NA	NA	no	no	no	no	no	no	no	no	no	no	yes	no	yes	no	no	no	no	no	no	no	no	4	7	yes	no	no	stuporous	36,1-38,9øC	4	Piperacillin+Tazobactam	IV (parenteral)
H2-18-0640-1	Hospital 2	1947	71	2018-11-27	2018-11-27	2018-12-14	male	BLOOMY	Training cohort	Staphylococcus aureus	no	no focus identified	community acquired	gp2	survived	21.5029	76	188	no	no	no	no	no	no	no	no	no	no	no	no	no	no	no	no	no	no	no	no	no	3	3	no	no	no	alert	36,1-38,9øC	0	Ampicillin+Sulbactam	IV (parenteral)
H2-18-0647-1	Hospital 2	1953	65	2018-10-30	2018-11-29	2018-12-19	female	BLOOMY	Training cohort	Staphylococcus aureus	no	cardiovascular; intravasale foreign body	hospital acquired	gp1	survived	22.2137	52	153	no	no	no	no	no	no	no	no	no	no	no	no	no	no	no	no	no	no	no	no	no	2	2	no	no	no	alert	36,1-38,9øC	0	Piperacillin+Tazobactam	IV (parenteral)
H2-18-0648-1	Hospital 2	1935	83	2018-11-27	2018-11-29	2018-12-13	male	BLOOMY	Validation cohort	Staphylococcus aureus	no	cardiovascular; intravasale foreign body	hospital acquired	gp1	survived	30.1194	82	165	no	no	no	no	yes	no	no	no	no	no	yes	no	no	no	no	no	no	no	no	no	no	4	6	no	no	no	alert	36,1-38,9øC	0	Flucloxacillin	IV (parenteral)
H2-18-0650-1	Hospital 2	1939	79	2018-12-01	2018-12-01	2019-01-08	male	BLOOMY	Training cohort	Staphylococcus aureus	no	bone and joint	community acquired	gp3	survived	23.8367	73	175	no	no	no	no	no	no	no	no	no	no	yes	no	no	no	no	no	no	no	no	no	no	3	4	no	no	no	alert	36,1-38,9øC	0	Ampicillin+Sulbactam	IV (parenteral)
H2-18-0656-1	Hospital 2	1957	61	2018-12-04	2018-12-04	2018-12-28	male	BLOOMY	Validation cohort	Staphylococcus aureus	no	no focus identified	community acquired	gp2	survived	26.9896	78	170	no	no	no	no	no	yes	no	no	no	no	no	no	no	no	yes	no	no	no	no	no	no	2	5	no	no	no	alert	35,1-36,0øC or 39,0-39,9øC	1	Piperacillin+Tazobactam	IV (parenteral)
H2-18-0659-1	Hospital 2	1997	21	2018-11-15	2018-12-06	2018-12-20	female	BLOOMY	Training cohort	Staphylococcus aureus	no	cardiovascular; intravasale foreign body	hospital acquired	gp1	survived	18.026	45	158	no	no	no	no	no	no	no	no	no	no	no	no	no	no	no	no	no	no	no	no	no	1	1	no	no	no	disoriented	35,1-36,0øC or 39,0-39,9øC	2	Meropenem	IV (parenteral)
H2-18-0661-1	Hospital 2	1959	59	2018-12-02	2018-12-07	2018-12-31	male	BLOOMY	Training cohort	Staphylococcus aureus	yes	skin and soft tissue	hospital acquired	gp2	survived	28.0864	91	180	no	no	no	no	no	yes	no	no	no	no	no	no	no	no	yes	no	no	yes	no	no	no	1	6	no	no	no	alert	36,1-38,9øC	0	Flucloxacillin	IV (parenteral)
H2-18-0700-1	Hospital 2	1963	55	2018-12-07	2018-12-11	2018-12-23	male	BLOOMY	Training cohort	Staphylococcus aureus	no	cardiovascular	hospital acquired	gp1	survived	40.6445	112	166	no	no	no	no	no	no	no	no	no	yes	no	no	no	no	yes	no	no	no	no	no	no	1	6	no	no	no	alert	36,1-38,9øC	0	Ceftriaxon	IV (parenteral)
H2-18-0723-1	Hospital 2	1958	60	2018-12-21	2018-12-21	2019-01-18	female	BLOOMY	Training cohort	Staphylococcus aureus	no	skin and soft tissue	community acquired	gp2	survived	16.0156	41	160	no	no	no	no	no	no	no	no	no	no	no	no	no	no	no	no	no	no	no	no	no	2	2	unknown	no	no	alert	36,1-38,9øC	0	Meropenem	IV (parenteral)
H2-18-0724-1	Hospital 2	1980	38	2018-11-01	2018-12-22	2019-01-28	male	BLOOMY	Training cohort	Staphylococcus aureus	no	cardiovascular; intravasale foreign body	hospital acquired	gp3	survived	24.1633	74	175	no	no	unknown	no	no	no	no	no	no	no	yes	no	no	no	no	no	no	no	no	no	no	1	2	no	no	no	alert	35,1-36,0øC or 39,0-39,9øC	1	Sultamicillin	oral
H2-18-0733-1	Hospital 2	1959	59	2018-12-27	2018-12-27	2019-01-16	female	BLOOMY	Training cohort	Staphylococcus aureus	no	bone and joint; foreign body	community acquired	gp1	survived	17.5064	50	169	no	no	no	no	no	no	no	no	yes	no	no	no	no	no	no	no	no	no	no	no	no	1	2	no	no	no	alert	36,1-38,9øC	0	Ceftriaxon	IV (parenteral)
H2-18-0734-1	Hospital 2	1953	65	2018-12-27	2018-12-28	2019-01-11	male	BLOOMY	Validation cohort	Staphylococcus aureus	no	bone and joint	community acquired	gp1	survived	20.5151	65	178	no	no	no	no	no	no	no	no	no	no	yes	no	no	no	unknown	no	no	no	no	no	no	2	3	no	no	no	alert	36,1-38,9øC	0	Linezolid	IV (parenteral)
H2-19-0005-1	Hospital 2	1937	81	2018-12-02	2019-01-03	2019-01-16	male	BLOOMY	Training cohort	Staphylococcus aureus	no	cardiovascular; intravasale foreign body	hospital acquired	gp2	survived	26.9274	76	168	yes	yes	no	no	no	no	no	no	no	no	no	no	no	no	yes	yes	no	no	no	no	no	4	14	no	no	no	alert	36,1-38,9øC	0	Piperacillin+Tazobactam	IV (parenteral)
H2-19-0010-1	Hospital 2	1954	65	2019-01-06	2019-01-06	2019-01-24	male	BLOOMY	Validation cohort	Staphylococcus aureus	no	cardiovascular; intravasale foreign body	community acquired	gp2	survived	23.4375	60	160	no	no	no	no	no	no	no	no	no	no	no	no	yes	yes	no	no	no	no	no	no	no	2	6	yes	no	no	alert	=< 35øC oder >= 40øC	4	Piperacillin+Tazobactam	IV (parenteral)
H2-19-0014-1	Hospital 2	1959	60	2019-01-02	2019-01-08	2019-01-24	male	BLOOMY	Validation cohort	Staphylococcus aureus	no	no focus identified	hospital acquired	gp1	survived	unknown	NA	NA	yes	no	no	no	no	no	no	no	no	no	no	no	no	no	no	no	no	no	no	no	no	2	3	yes	yes	no	comatose	36,1-38,9øC	8	Flucloxacillin	IV (parenteral)
H2-19-0017-1	Hospital 2	1923	96	2019-01-10	2019-01-10	2019-01-10	male	BLOOMY	Training cohort	Staphylococcus aureus	no	respiratory	community acquired	gp2	diseased	unknown	NA	NA	no	yes	no	no	no	no	no	no	no	no	no	no	no	no	yes	no	no	no	no	no	no	5	8	yes	no	yes	stuporous	36,1-38,9øC	8	Ampicillin+Sulbactam	IV (parenteral)
H2-19-0026-1	Hospital 2	1970	49	2019-01-15	2019-01-16	2019-01-30	male	BLOOMY	Validation cohort	Staphylococcus aureus	no	cardiovascular; intravasale foreign body	community acquired	gp1	survived	28.0816	86	175	no	no	no	no	no	no	no	no	no	no	yes	no	no	no	no	no	no	no	no	no	no	1	2	no	no	no	alert	35,1-36,0øC or 39,0-39,9øC	1	Flucloxacillin	IV (parenteral)
H2-19-0037-1	Hospital 2	1963	56	2019-01-23	2019-01-23	2019-02-16	male	BLOOMY	Training cohort	Staphylococcus aureus	no	bone and joint	community acquired	gp1	survived	unknown	NA	NA	no	no	no	no	no	no	no	no	no	no	yes	yes	no	no	no	no	no	no	no	no	no	1	4	no	no	no	alert	36,1-38,9øC	0	Ampicillin+Sulbactam	IV (parenteral)
H2-19-0046-1	Hospital 2	1951	68	2019-01-30	2019-01-30	2019-02-11	male	BLOOMY	Training cohort	Staphylococcus aureus	no	no focus identified	community acquired	gp2	survived	18.2899	48	162	no	no	no	no	no	no	no	no	no	no	no	no	no	no	no	no	no	no	no	no	no	2	2	no	no	no	alert	36,1-38,9øC	0	Cefazolin	IV (parenteral)
H2-19-0048-1	Hospital 2	1940	79	2019-01-31	2019-01-31	2019-02-02	male	BLOOMY	Validation cohort	Staphylococcus aureus	no	respiratory	community acquired	gp3	diseased	26.2346	85	180	no	yes	no	no	no	yes	no	no	yes	no	no	no	yes	no	no	no	no	no	no	no	no	3	8	yes	yes	no	comatose	35,1-36,0øC or 39,0-39,9øC	9	Flucloxacillin	IV (parenteral)
H2-19-0049-1	Hospital 2	1938	81	2019-01-31	2019-01-31	2019-02-04	female	BLOOMY	Training cohort	Staphylococcus aureus	no	respiratory	community acquired	gp3	diseased	15.3697	46	173	no	no	no	yes	no	no	no	no	no	no	no	no	no	no	no	no	no	no	no	no	no	4	5	no	no	no	alert	36,1-38,9øC	0	Ampicillin+Sulbactam	IV (parenteral)
H2-19-0715-1	Hospital 2	1931	88	2019-12-13	2019-12-13	2019-12-31	female	PREDICT	Training cohort	Staphylococcus aureus	no	cardiovascular; intravasale foreign body	community acquired	gp3	survived	25.5102	72	168	no	no	no	no	no	no	no	no	no	no	no	no	yes	no	yes	no	no	no	no	no	no	4	8	yes	no	no	alert	36,1-38,9°C	2	Piperacillin/Tazobactam	IV (parenteral)
H2-19-0722-1	Hospital 2	1928	91	2019-12-20	2019-12-20	2019-12-30	male	PREDICT	Training cohort	Staphylococcus aureus	no	respiratory	community acquired	gp1	diseased	24.0238	67	167	no	no	no	yes	no	no	no	no	no	no	no	no	no	no	no	no	no	no	no	no	no	5	6	no	no	no	stuporous	35,1-36,0°C or 39,0-39,9°C	3	Piperacillin/Tazobactam	IV (parenteral)
H2-19-0744-1	Hospital 2	1930	89	2019-12-22	2019-12-22	2019-12-23	female	PREDICT	Training cohort	Staphylococcus aureus	no	no focus identified	community acquired	gp1	diseased	unknown	NA	NA	no	no	no	no	no	yes	no	no	no	no	no	no	no	no	no	no	no	no	no	no	no	4	5	no	yes	no	comatose	36,1-38,9°C	6	Piperacillin/Tazobactam	IV (parenteral)
H2-20-0001-1	Hospital 2	1950	69	2019-12-17	NA	2020-01-17	male	PREDICT	Training cohort	Staphylococcus aureus	no	abdominal; foreign body	hospital acquired	gp3	survived	33.7633	103.400001525879	175	no	no	no	no	no	yes	no	no	no	no	yes	no	no	no	yes	yes	no	no	no	no	no	2	12	no	no	no	alert	36,1-38,9°C	0	Piperacillin/Tazobactam	IV (parenteral)
H2-20-0011-1	Hospital 2	1984	35	2019-12-16	2020-01-05	2020-02-05	male	PREDICT	Training cohort	Staphylococcus aureus	no	cardiovascular; intravasale foreign body	hospital acquired	gp1	survived	19.9446	72	190	no	no	no	no	yes	no	no	no	no	no	no	no	yes	yes	no	no	no	no	no	no	no	1	6	no	no	no	disoriented	35,1-36,0°C or 39,0-39,9°C	2	Piperacillin/Tazobactam	IV (parenteral)
H2-20-0019-1	Hospital 2	1944	76	2020-01-07	2020-01-09	2020-02-25	male	PREDICT	Training cohort	Staphylococcus aureus	no	other	hospital acquired	gp1	survived	29.6827	74.0999984741211	158	no	yes	no	no	yes	no	no	no	no	no	no	no	no	no	no	no	no	no	no	no	no	3	5	no	no	no	alert	36,1-38,9°C	0	Ampicillin/Sulbactam	IV (parenteral)
H2-20-0022-1	Hospital 2	1943	77	2020-01-06	2020-01-12	2020-01-30	male	PREDICT	Training cohort	Staphylococcus aureus	no	respiratory	hospital acquired	gp1	survived	33.2085	110	182	no	no	no	no	no	yes	no	no	no	no	no	yes	yes	no	yes	no	no	no	no	no	no	3	10	yes	yes	no	stuporous	36,1-38,9°C	6	Piperacillin/Tazobactam	IV (parenteral)
H2-20-0045-1	Hospital 2	1966	54	2020-01-22	2020-01-22	2020-01-31	male	PREDICT	Validation cohort	Staphylococcus aureus	no	skin and soft tissue	community acquired	gp2	diseased	22.206	76	185	no	yes	no	no	no	no	no	no	no	no	no	yes	yes	no	no	no	no	no	no	no	no	1	6	no	no	no	alert	36,1-38,9°C	0	Ampicillin/Sulbactam	IV (parenteral)
H2-20-0054-1	Hospital 2	1957	63	2020-01-27	2020-01-28	2020-02-14	male	PREDICT	Training cohort	Staphylococcus aureus	no	other	community acquired	gp1	survived	23.1241	80	186	no	no	no	no	no	yes	no	no	no	yes	no	no	no	no	no	no	no	no	no	no	no	2	6	no	no	no	alert	36,1-38,9°C	0	Ampicillin/Sulbactam	IV (parenteral)
H2-20-0067-1	Hospital 2	1944	76	2020-02-03	2020-02-03	2020-02-17	male	PREDICT	Training cohort	Staphylococcus aureus	no	cardiovascular; intravasale foreign body	community acquired	gp1	survived	26.2188	74	168	no	no	no	no	yes	no	no	no	yes	no	yes	no	no	yes	yes	no	no	no	no	no	no	3	10	no	no	no	disoriented	36,1-38,9°C	1	Vancomycin	IV (parenteral)
H2-20-0075-1	Hospital 2	1954	66	2020-02-06	2020-02-10	2020-02-26	male	PREDICT	Training cohort	Staphylococcus aureus	no	bone and joint	hospital acquired	gp1	survived	26.8687	89	182	no	no	no	no	no	no	no	no	yes	no	no	no	no	no	no	no	no	no	no	no	no	2	3	no	no	no	alert	36,1-38,9°C	0	Flucloxacillin	IV (parenteral)
H2-20-0077-1	Hospital 2	1966	54	2020-02-12	2020-02-12	2020-03-20	male	PREDICT	Training cohort	Staphylococcus aureus	no	cardiovascular; intravasale foreign body	community acquired	gp2	survived	20.4849	79.5	197	no	no	no	no	no	no	no	no	no	no	no	no	no	no	yes	no	no	no	no	no	no	1	3	unknown	no	no	alert	36,1-38,9°C	0	Piperacillin/Tazobactam	IV (parenteral)
H2-20-0082-1	Hospital 2	1961	59	2020-02-12	2020-02-12	2020-03-07	male	PREDICT	Training cohort	Staphylococcus aureus	no	respiratory	community acquired	gp1	diseased	19.4094	65	183	no	no	no	no	no	yes	no	no	no	no	no	no	yes	no	no	no	no	no	no	no	no	1	4	no	yes	no	disoriented	35,1-36,0°C or 39,0-39,9°C	4	Clarithromycin	IV (parenteral)
H2-20-0083-1	Hospital 2	1954	66	2020-02-05	2020-02-13	2020-04-01	male	PREDICT	Training cohort	Staphylococcus aureus	no	cardiovascular; intravasale foreign body	hospital acquired	gp1	survived	21.6049	70	180	no	no	no	no	no	no	no	no	no	no	no	no	no	no	no	no	no	no	no	no	no	2	2	yes	no	no	alert	36,1-38,9°C	2	Piperacillin/Tazobactam	IV (parenteral)
H2-20-0087-1	Hospital 2	1937	83	2020-02-17	2020-02-17	2020-03-03	male	PREDICT	Training cohort	Staphylococcus aureus	no	bone and joint	community acquired	gp1	survived	27.1731	93	185	no	no	no	no	no	no	no	no	no	no	no	yes	no	no	yes	no	no	no	no	no	no	4	8	no	no	no	alert	36,1-38,9°C	0	Ampicillin/Sulbactam	IV (parenteral)
H2-20-0097-1	Hospital 2	1954	66	2020-02-20	2020-02-20	2020-03-12	male	PREDICT	Training cohort	Staphylococcus aureus	no	skin and soft tissue	community acquired	gp1	survived	19.7531	64	180	no	no	no	no	no	no	no	no	no	no	no	no	no	no	no	no	no	no	no	no	no	2	2	no	no	no	alert	36,1-38,9°C	0	Cefazolin	IV (parenteral)
H2-20-0098-1	Hospital 2	1946	74	2020-02-12	2020-02-20	2020-02-27	female	PREDICT	Training cohort	Staphylococcus aureus	no	no focus identified	hospital acquired	gp1	diseased	26.0156	66.5999984741211	160	no	no	no	no	no	no	no	no	no	no	yes	no	no	no	yes	no	yes	no	no	no	no	3	8	no	no	no	disoriented	35,1-36,0°C or 39,0-39,9°C	2	Piperacillin/Tazobactam	IV (parenteral)
H2-20-0104-1	Hospital 2	1946	74	2020-02-21	2020-02-23	2020-03-18	male	PREDICT	Training cohort	Staphylococcus aureus	no	respiratory	hospital acquired	gp2	survived	26.2346	85	180	no	no	no	no	no	no	no	no	no	no	no	no	no	no	no	no	no	no	no	no	no	3	3	yes	no	no	alert	35,1-36,0°C or 39,0-39,9°C	3	Piperacillin/Tazobactam	IV (parenteral)
H2-20-0111-1	Hospital 2	1949	71	2020-02-28	2020-02-28	2020-03-24	male	PREDICT	Training cohort	Staphylococcus aureus	no	bone and joint; foreign body	community acquired	gp1	survived	24.093	68	168	no	no	no	no	no	no	no	no	no	no	no	no	no	no	no	no	no	no	no	no	no	3	3	no	no	no	stuporous	36,1-38,9°C	2	Ampicillin/Sulbactam	IV (parenteral)
H2-20-0114-1	Hospital 2	1947	73	2020-02-28	2020-03-01	2020-03-06	female	PREDICT	Training cohort	Staphylococcus aureus	no	no focus identified	hospital acquired	gp2	diseased	31.5617	100	178	no	no	no	no	no	no	no	no	yes	no	no	no	no	no	no	no	no	no	no	no	no	3	4	yes	no	no	disoriented	36,1-38,9°C	3	Piperacillin/Tazobactam	IV (parenteral)
H2-20-0115-1	Hospital 2	1951	69	2020-03-01	2020-03-01	2020-03-17	male	PREDICT	Training cohort	Staphylococcus aureus	no	skin and soft tissue	community acquired	gp1	survived	34.2058	92	164	no	no	yes	no	no	no	no	no	no	no	no	no	yes	no	no	no	no	no	no	no	no	2	5	yes	no	no	stuporous	36,1-38,9°C	4	Piperacillin/Tazobactam	IV (parenteral)
H2-20-0129-1	Hospital 2	1956	64	2020-03-10	2020-03-10	2020-03-17	male	PREDICT	Training cohort	Staphylococcus aureus	no	cardiovascular; intravasale foreign body	community acquired	gp1	survived	25.1559	71	168	no	no	no	no	no	no	no	no	no	no	no	yes	yes	no	no	no	no	no	no	no	no	2	6	no	no	no	alert	35,1-36,0°C or 39,0-39,9°C	1	Piperacillin/Tazobactam	IV (parenteral)
H2-20-0143-1	Hospital 2	1959	61	2020-03-13	2020-03-20	2020-03-31	female	PREDICT	Training cohort	Staphylococcus aureus	no	no focus identified	hospital acquired	gp1	diseased	unknown	NA	160	no	no	no	no	no	no	no	no	no	no	no	no	no	no	no	no	no	no	no	no	no	2	2	no	yes	no	comatose	36,1-38,9°C	6	Piperacillin/Tazobactam	IV (parenteral)
H2-20-0149-1	Hospital 2	1949	71	2020-03-06	2020-03-24	2020-04-11	female	PREDICT	Training cohort	Staphylococcus aureus	no	cardiovascular; intravasale foreign body	hospital acquired	gp2	diseased	23.3067	65	167	no	yes	no	no	no	no	no	no	no	no	no	no	yes	no	no	no	no	no	no	no	no	3	6	yes	no	no	alert	35,1-36,0°C or 39,0-39,9°C	3	Flucloxacillin	IV (parenteral)
H2-20-0150-1	Hospital 2	1971	49	2020-03-25	2020-03-25	2020-04-04	female	PREDICT	Training cohort	Staphylococcus aureus	no	skin and soft tissue	community acquired	gp2	survived	22.4082	64	169	no	no	no	no	no	no	no	no	no	no	no	no	no	no	no	no	no	no	no	no	yes	1	1	no	no	no	alert	36,1-38,9°C	0	Ceftriaxon	IV (parenteral)
H2-20-0153-1	Hospital 2	1962	58	2020-03-20	2020-03-27	2020-04-11	male	PREDICT	Training cohort	Staphylococcus aureus	no	cardiovascular; intravasale foreign body	hospital acquired	gp2	survived	27.9947	100	189	no	no	no	no	no	no	no	no	no	no	no	no	no	no	no	no	no	no	no	yes	no	1	1	no	no	no	alert	=< 35°C oder >= 40°C	2	Ceftriaxon	IV (parenteral)
H2-20-0169-1	Hospital 2	1946	74	2020-04-10	2020-04-11	2020-04-11	female	PREDICT	Validation cohort	Staphylococcus aureus	no	abdominal	community acquired	gp2	diseased	unknown	NA	NA	no	no	no	no	no	no	no	no	yes	no	no	no	no	no	yes	no	no	no	no	no	no	3	6	yes	yes	yes	unknown	36,1-38,9°C	8	Ceftriaxon	IV (parenteral)
H2-20-0173-1	Hospital 2	1943	77	2020-04-16	2020-04-16	2020-05-26	male	PREDICT	Training cohort	Staphylococcus aureus	no	bone and joint	community acquired	gp1	survived	17.9024	59.3	182	no	no	no	no	yes	no	no	no	no	no	yes	no	no	no	no	no	no	no	no	no	no	3	5	no	yes	no	comatose	35,1-36,0°C or 39,0-39,9°C	7	Ampicillin/Sulbactam	IV (parenteral)
H2-20-0178-1	Hospital 2	1942	78	2020-04-18	2020-04-18	2020-05-06	male	PREDICT	Validation cohort	Staphylococcus aureus	no	bone and joint	community acquired	gp1	survived	unknown	94	NA	no	no	yes	no	no	no	no	no	no	no	no	yes	yes	no	no	no	no	no	no	no	no	3	8	no	no	no	alert	36,1-38,9°C	0	Ampicillin/Sulbactam	IV (parenteral)
H2-20-0182-1	Hospital 2	1943	77	2020-04-21	2020-04-21	2020-04-28	male	PREDICT	Validation cohort	Staphylococcus aureus	no	bone and joint	community acquired	gp1	diseased	31.1419	90	170	no	yes	no	no	no	yes	no	no	no	no	no	yes	no	no	no	no	no	no	no	no	no	3	7	no	no	no	alert	36,1-38,9°C	0	Meropenem	IV (parenteral)
H2-20-0226-1	Hospital 2	1954	66	2020-05-17	2020-05-18	2020-05-26	male	PREDICT	Training cohort	Staphylococcus aureus	no	no focus identified	community acquired	gp1	diseased	23.7253	57	155	no	no	no	no	no	yes	no	no	no	yes	no	no	no	no	yes	yes	no	no	no	no	no	2	14	yes	no	no	alert	36,1-38,9°C	2	Piperacillin/Tazobactam	IV (parenteral)
H2-20-0236-1	Hospital 2	1938	82	2020-05-21	2020-05-21	2020-06-25	male	PREDICT	Validation cohort	Staphylococcus aureus	no	urogenital	community acquired	gp3	survived	27.4756	73	163	yes	yes	no	no	no	no	no	no	no	no	no	no	yes	no	no	no	no	no	no	no	no	4	8	no	no	no	alert	36,1-38,9°C	0	Erythromycin	IV (parenteral)
H2-20-0248-1	Hospital 2	1948	72	2020-05-29	2020-05-29	2020-06-22	male	PREDICT	Training cohort	Staphylococcus aureus	no	skin and soft tissue; foreign body	community acquired	gp2	diseased	34.4047	121.6	188	no	no	no	no	no	yes	no	yes	no	no	no	no	yes	no	no	no	no	no	no	no	no	3	7	yes	no	no	alert	35,1-36,0°C or 39,0-39,9°C	3	Piperacillin/Tazobactam	IV (parenteral)
H2-20-0251-1	Hospital 2	1938	82	2020-05-23	2020-05-30	2020-06-06	female	PREDICT	Validation cohort	Staphylococcus aureus	no	cardiovascular	hospital acquired	gp1	diseased	22.0386	60	165	no	yes	no	no	yes	no	no	no	no	no	no	no	yes	no	no	no	no	no	no	no	yes	4	8	no	no	no	disoriented	36,1-38,9°C	1	Piperacillin/Tazobactam	IV (parenteral)
H2-20-0252-1	Hospital 2	1967	53	2020-05-31	2020-05-31	2020-06-17	male	PREDICT	Training cohort	Staphylococcus aureus	no	bone and joint	community acquired	gp2	survived	40.3538	125	176	yes	no	no	no	no	yes	no	no	no	no	no	no	no	no	no	no	no	no	no	no	no	1	3	no	no	no	alert	36,1-38,9°C	0	Ampicillin/Sulbactam	IV (parenteral)
H2-20-0257-1	Hospital 2	1935	85	2020-05-22	2020-06-02	2020-06-15	female	PREDICT	Training cohort	Staphylococcus aureus	no	cardiovascular; intravasale foreign body	hospital acquired	gp1	diseased	23.8281	61	160	no	yes	no	no	no	yes	no	no	no	no	no	no	yes	no	yes	no	no	no	no	no	no	4	10	no	no	no	disoriented	36,1-38,9°C	1	Piperacillin/Tazobactam	IV (parenteral)
H2-20-0281-1	Hospital 2	1937	83	2020-06-12	2020-06-12	2020-06-26	male	PREDICT	Training cohort	Staphylococcus aureus	no	skin and soft tissue	community acquired	gp3	survived	24.6181	78	178	no	no	no	no	yes	no	no	no	no	no	yes	no	yes	no	no	no	no	no	no	no	no	4	8	no	no	no	stuporous	35,1-36,0°C or 39,0-39,9°C	3	Piperacillin/Tazobactam	IV (parenteral)
H2-20-0287-1	Hospital 2	1942	78	2020-06-15	2020-06-15	2020-07-07	male	PREDICT	Validation cohort	Staphylococcus aureus	no	skin and soft tissue	community acquired	gp3	survived	25.2493	80	178	no	no	no	no	yes	no	no	no	no	no	no	yes	yes	yes	no	no	no	no	no	no	no	3	10	no	no	no	disoriented	36,1-38,9°C	1	Piperacillin/Tazobactam	IV (parenteral)
H2-20-0293-1	Hospital 2	1936	84	2020-05-04	2020-06-19	2020-07-01	male	PREDICT	Validation cohort	Staphylococcus aureus	no	no focus identified	hospital acquired	gp2	diseased	25.2595	73	170	no	no	no	no	yes	no	no	no	no	no	no	no	no	yes	yes	yes	no	no	no	no	no	4	15	no	no	no	alert	36,1-38,9°C	0	Meropenem	IV (parenteral)
H2-20-0296-1	Hospital 2	1954	66	2020-06-21	2020-06-21	2020-07-07	female	PREDICT	Training cohort	Staphylococcus aureus	no	cardiovascular; intravasale foreign body	community acquired	gp1	survived	22.83	48	145	no	no	no	no	no	no	no	no	no	no	no	no	no	no	yes	no	no	no	no	no	no	2	4	no	no	no	alert	36,1-38,9°C	0	Vancomycin	IV (parenteral)
H2-20-0297-1	Hospital 2	1939	81	2020-06-05	2020-06-21	2020-06-29	female	PREDICT	Training cohort	Staphylococcus aureus	no	cardiovascular; intravasale foreign body	hospital acquired	gp1	diseased	24.6094	63	160	no	yes	no	no	no	yes	yes	no	yes	no	no	no	yes	no	yes	no	no	no	no	no	no	4	12	yes	no	no	alert	36,1-38,9°C	2	Ampicillin/Sulbactam	IV (parenteral)
H2-20-0303-1	Hospital 2	1948	72	2020-06-17	2020-06-24	2020-07-03	male	PREDICT	Training cohort	Staphylococcus aureus	no	cardiovascular; intravasale foreign body	hospital acquired	gp2	survived	18.2204	55.7999992370605	175	no	no	no	no	no	yes	no	no	no	no	no	no	no	no	yes	yes	no	no	no	no	no	3	12	yes	no	no	alert	35,1-36,0°C or 39,0-39,9°C	3	Ampicillin/Sulbactam	IV (parenteral)
H2-20-0307-1	Hospital 2	1961	59	2020-06-23	2020-06-25	2020-07-30	male	PREDICT	Training cohort	Staphylococcus aureus	no	cardiovascular; intravasale foreign body	hospital acquired	gp3	survived	22.3094	66	172	no	no	no	no	no	no	no	no	no	no	no	no	no	no	yes	yes	no	no	no	no	no	1	9	yes	no	no	disoriented	36,1-38,9°C	3	Linezolid	IV (parenteral)
H2-20-0327-1	Hospital 2	1973	47	2020-07-06	2020-07-06	2020-07-27	male	PREDICT	Training cohort	Staphylococcus aureus	no	skin and soft tissue	community acquired	gp1	survived	20.346	58.7999992370605	170	no	no	no	no	no	no	no	no	yes	no	no	no	no	no	no	no	no	no	no	no	no	1	2	yes	no	no	stuporous	=< 35°C oder >= 40°C	6	Ampicillin/Sulbactam	IV (parenteral)
H2-20-0337-1	Hospital 2	1954	66	2020-07-03	2020-07-14	2020-07-27	female	PREDICT	Training cohort	Staphylococcus aureus	yes	cardiovascular; intravasale foreign body	hospital acquired	gp2	diseased	25.2595	73	170	yes	no	no	no	no	yes	yes	no	no	no	no	no	no	no	no	no	no	no	no	no	no	2	5	no	no	no	alert	36,1-38,9°C	0	Piperacillin	IV (parenteral)
H2-20-0339-1	Hospital 2	1934	86	2020-07-14	2020-07-14	2020-07-16	male	PREDICT	Validation cohort	Staphylococcus aureus	no	bone and joint	community acquired	gp1	diseased	31.1419	90	170	no	no	no	no	no	no	no	no	no	no	no	no	yes	no	yes	no	yes	no	no	no	no	4	10	yes	yes	no	comatose	36,1-38,9°C	8	Ampicillin/Sulbactam	IV (parenteral)
H2-20-0343-1	Hospital 2	1942	78	2020-06-30	2020-07-18	2020-08-11	male	PREDICT	Training cohort	Staphylococcus aureus	no	skin and soft tissue; foreign body	hospital acquired	gp2	survived	23.1241	80	186	no	no	no	no	no	no	no	no	no	no	no	no	no	no	no	no	no	no	no	no	no	3	3	no	no	no	alert	36,1-38,9°C	0	Ciprofloxacin	oral
H2-20-0345-1	Hospital 2	1962	58	2020-06-16	2020-07-18	2020-08-16	female	PREDICT	Training cohort	Staphylococcus aureus	no	abdominal	hospital acquired	gp1	survived	17.6309	48	165	no	no	no	no	no	no	no	yes	no	yes	no	no	yes	no	no	no	no	no	no	no	no	1	7	yes	no	no	alert	36,1-38,9°C	2	Piperacillin/Tazobactam	IV (parenteral)
H2-20-0346-1	Hospital 2	1940	80	2020-07-01	2020-07-18	2020-08-04	female	PREDICT	Training cohort	Staphylococcus aureus	no	no focus identified	hospital acquired	gp2	survived	25.7819	68.5	163	no	yes	no	no	no	no	no	no	no	no	no	no	no	no	yes	no	no	no	no	no	no	4	7	no	no	no	alert	35,1-36,0°C or 39,0-39,9°C	1	Vancomycin	IV (parenteral)
H2-20-0360-1	Hospital 2	1959	61	2020-07-23	2020-07-24	2020-08-19	male	PREDICT	Training cohort	Staphylococcus aureus	no	cardiovascular	community acquired	gp2	diseased	41.5225	120	170	no	yes	no	no	no	no	no	no	no	yes	yes	no	no	no	no	no	no	no	no	no	no	2	7	yes	no	no	stuporous	36,1-38,9°C	4	Flucloxacillin	IV (parenteral)
H2-20-0361-1	Hospital 2	1944	76	2020-07-25	2020-07-25	2020-08-27	male	PREDICT	Validation cohort	Staphylococcus aureus	no	skin and soft tissue	community acquired	gp1	survived	28.7347	86	173	yes	no	no	no	no	no	no	yes	no	no	yes	no	yes	no	no	no	no	no	no	no	no	3	8	no	no	no	alert	36,1-38,9°C	0	Ampicillin/Sulbactam	IV (parenteral)
H2-20-0375-1	Hospital 2	1950	70	2020-07-22	2020-07-30	2020-08-23	male	PREDICT	Training cohort	Staphylococcus aureus	no	respiratory	hospital acquired	gp2	diseased	27.4406	85	176	no	no	no	no	no	yes	no	no	no	no	no	no	no	no	no	no	no	no	no	no	no	3	4	yes	yes	no	comatose	36,1-38,9°C	8	Piperacillin/Tazobactam	IV (parenteral)
H2-20-0381-1	Hospital 2	1988	32	2020-08-01	2020-08-02	2020-09-15	male	PREDICT	Validation cohort	Staphylococcus aureus	no	cardiovascular; intravasale foreign body	community acquired	gp1	survived	36.7284	119	180	no	yes	no	no	no	no	yes	no	no	no	no	no	yes	no	yes	no	no	no	no	no	no	1	7	no	no	no	alert	36,1-38,9°C	0	Meropenem	IV (parenteral)
H2-20-0391-1	Hospital 2	1941	79	2020-08-05	2020-08-06	2020-08-17	female	PREDICT	Training cohort	Staphylococcus aureus	no	cardiovascular; intravasale foreign body	community acquired	gp1	survived	40.625	104	160	yes	no	no	no	no	no	no	no	no	no	no	no	yes	no	no	no	no	no	no	no	no	3	6	yes	no	no	disoriented	36,1-38,9°C	3	Rifampicin	IV (parenteral)
H2-20-0395-1	Hospital 2	1985	35	2020-08-10	2020-08-10	2020-09-04	female	PREDICT	Training cohort	Staphylococcus aureus	no	cardiovascular	community acquired	gp1	survived	20.5499	58	168	no	no	no	no	no	no	no	no	yes	no	no	no	no	no	no	no	no	no	no	no	no	1	2	yes	no	no	disoriented	35,1-36,0°C or 39,0-39,9°C	4	Ampicillin/Sulbactam	IV (parenteral)
H2-20-0401-1	Hospital 2	1954	66	2020-08-06	2020-08-13	2020-08-25	female	PREDICT	Training cohort	Staphylococcus aureus	no	cardiovascular; intravasale foreign body	hospital acquired	gp1	survived	20.5693	56	165	no	no	no	no	yes	no	no	no	no	no	no	no	no	no	no	no	no	no	no	no	no	2	3	no	no	no	stuporous	36,1-38,9°C	2	Cefuroxim-Natrium	IV (parenteral)
H2-20-0404-1	Hospital 2	1980	40	2020-08-03	2020-08-14	2020-09-03	male	PREDICT	Validation cohort	Staphylococcus aureus	no	cardiovascular; intravasale foreign body	hospital acquired	gp3	survived	28.9941	108	193	no	no	no	no	no	no	yes	no	yes	no	no	no	yes	no	no	no	no	no	no	no	no	1	5	no	no	no	alert	36,1-38,9°C	0	Flucloxacillin	IV (parenteral)
H2-20-0410-1	Hospital 2	1941	79	2020-08-16	2020-08-16	2020-08-29	male	PREDICT	Training cohort	Staphylococcus aureus	no	cardiovascular	community acquired	gp1	survived	22.9846	75.3	181	no	yes	yes	no	no	yes	no	no	no	no	no	yes	yes	no	no	no	no	no	no	no	no	3	10	no	no	no	alert	36,1-38,9°C	0	Meropenem	IV (parenteral)
H2-20-0415-1	Hospital 2	1948	72	2020-08-19	2020-08-19	2020-09-25	male	PREDICT	Training cohort	Staphylococcus aureus	no	cardiovascular; intravasale foreign body	community acquired	gp3	survived	25.8264	80	176	no	yes	no	no	yes	unknown	no	no	no	no	yes	no	no	no	yes	yes	no	no	no	no	no	3	14	unknown	no	no	unknown	36,1-38,9°C	0	Ampicillin/Sulbactam	NA
H2-20-0421-1	Hospital 2	1967	53	2020-08-22	2020-08-22	2020-08-25	female	PREDICT	Validation cohort	Staphylococcus aureus	no	cerebral	community acquired	gp1	diseased	unknown	NA	NA	no	no	no	no	no	no	no	no	no	no	no	no	no	no	no	no	no	no	no	no	no	1	1	yes	yes	no	comatose	35,1-36,0°C or 39,0-39,9°C	9	Ampicillin	IV (parenteral)
H2-20-0431-1	Hospital 2	1946	74	2020-08-24	2020-08-25	2020-09-08	male	PREDICT	Training cohort	Staphylococcus aureus	no	skin and soft tissue	community acquired	gp1	survived	24.6755	73	172	yes	no	no	no	no	no	no	no	no	no	no	no	no	no	no	no	no	no	no	no	no	3	4	yes	yes	no	stuporous	35,1-36,0°C or 39,0-39,9°C	7	Flucloxacillin	IV (parenteral)
H2-20-0432-1	Hospital 2	1956	64	2020-08-24	2020-08-25	2020-09-21	female	PREDICT	Training cohort	Staphylococcus aureus	no	respiratory	community acquired	gp1	survived	39.8962	115.300003051758	170	no	no	no	no	no	no	no	no	no	no	no	yes	yes	no	no	no	no	no	no	no	no	2	6	no	no	no	alert	36,1-38,9°C	0	Ampicillin/Sulbactam	IV (parenteral)
H2-20-0437-1	Hospital 2	1968	52	2020-08-27	2020-08-29	2020-09-14	male	PREDICT	Training cohort	Staphylococcus aureus	yes	cardiovascular; intravasale foreign body	hospital acquired	gp1	survived	28.3604	81	169	no	no	no	unknown	unknown	no	no	no	yes	no	no	no	no	no	yes	no	no	no	no	no	no	1	4	no	no	no	alert	36,1-38,9°C	0	Flucloxacillin	IV (parenteral)
H2-20-0440-1	Hospital 2	1954	66	2020-08-30	2020-08-30	2020-09-08	male	PREDICT	Training cohort	Staphylococcus aureus	no	skin and soft tissue	community acquired	gp1	survived	28.6339	110	196	no	no	yes	no	no	no	no	no	no	no	yes	no	no	no	no	no	no	no	no	no	no	2	4	no	no	no	alert	35,1-36,0°C or 39,0-39,9°C	1	Ampicillin/Sulbactam	IV (parenteral)
H2-20-0444-1	Hospital 2	2001	19	2020-08-21	2020-09-01	2020-09-18	male	PREDICT	Training cohort	Staphylococcus aureus	no	skin and soft tissue	hospital acquired	gp2	survived	26.0571	79.8000030517578	175	no	no	no	no	no	no	no	no	yes	no	no	no	yes	no	no	no	no	no	unknown	unknown	no	1	4	no	no	no	alert	36,1-38,9°C	0	Flucloxacillin	IV (parenteral)
H2-20-0445-1	Hospital 2	1937	83	2020-09-01	2020-09-01	2020-09-06	male	PREDICT	Training cohort	Staphylococcus aureus	no	respiratory	community acquired	gp1	diseased	23.5102	72	175	no	no	no	no	no	no	no	no	no	no	no	no	no	no	yes	yes	no	no	no	no	no	4	12	no	no	no	alert	=< 35°C oder >= 40°C	2	Ampicillin/Sulbactam	IV (parenteral)
H2-20-0454-1	Hospital 2	1955	65	2020-09-04	2020-09-04	2020-09-22	male	PREDICT	Validation cohort	Staphylococcus aureus	no	cardiovascular; intravasale foreign body	community acquired	gp1	survived	20.2241	64.8000030517578	179	no	no	yes	no	no	yes	no	no	no	no	no	no	yes	no	yes	no	no	no	no	no	no	2	8	no	no	no	alert	36,1-38,9°C	0	Piperacillin/Tazobactam	IV (parenteral)
H2-20-0455-1	Hospital 2	1934	86	2020-09-01	2020-09-04	2020-09-08	male	PREDICT	Validation cohort	Staphylococcus aureus	no	no focus identified	hospital acquired	gp2	survived	25.9043	83	179	no	yes	no	no	yes	no	no	no	no	no	no	no	no	no	no	no	no	no	no	no	no	4	6	no	no	no	alert	36,1-38,9°C	0	Ampicillin/Sulbactam	IV (parenteral)
H2-20-0470-1	Hospital 2	1941	79	2020-09-09	2020-09-12	2020-09-14	male	PREDICT	Validation cohort	Staphylococcus aureus	no	cardiovascular; intravasale foreign body	hospital acquired	gp4	diseased	30.8642	100	180	no	yes	no	no	yes	no	no	yes	no	no	no	no	yes	no	yes	no	no	no	no	no	no	3	10	yes	no	no	stuporous	=< 35°C oder >= 40°C	6	Vancomycin	IV (parenteral)
H2-20-0471-1	Hospital 2	1971	49	2020-09-11	2020-09-12	2020-09-17	male	PREDICT	Training cohort	Staphylococcus aureus	no	cardiovascular; intravasale foreign body	community acquired	gp1	survived	19.4104	61.5	178	no	yes	no	no	no	no	no	no	no	unknown	no	no	yes	no	no	no	no	no	no	no	no	1	4	yes	no	no	alert	36,1-38,9°C	2	Cefuroxim-Natrium	IV (parenteral)
H2-20-0474-1	Hospital 2	1929	91	2020-09-12	2020-09-13	2020-09-14	male	PREDICT	Training cohort	Staphylococcus aureus	no	respiratory	community acquired	gp2	diseased	unknown	NA	NA	no	no	no	yes	no	no	no	no	yes	no	yes	no	yes	no	yes	no	no	no	no	no	no	5	12	yes	yes	yes	comatose	=< 35°C oder >= 40°C	14	Ampicillin/Sulbactam	IV (parenteral)
H2-20-0491-1	Hospital 2	1960	60	2020-09-18	2020-09-18	2020-10-07	female	PREDICT	Training cohort	Staphylococcus aureus	no	bone and joint	community acquired	gp3	survived	35.2617	96	165	no	no	no	no	no	no	no	no	no	no	no	no	no	no	no	no	no	no	no	no	no	2	2	no	no	no	alert	36,1-38,9°C	0	Vancomycin	IV (parenteral)
H2-20-0499-1	Hospital 2	1948	72	2020-09-22	2020-09-22	2020-10-01	male	PREDICT	Training cohort	Staphylococcus aureus	no	cardiovascular	community acquired	gp1	diseased	19.6052	58	172	no	no	no	no	no	no	no	no	yes	no	no	no	yes	no	yes	no	no	yes	no	no	no	3	10	no	no	no	disoriented	36,1-38,9°C	1	Ceftazidim	IV (parenteral)
H2-20-0512-1	Hospital 2	1955	65	2020-09-26	2020-09-26	2020-10-19	female	PREDICT	Training cohort	Staphylococcus aureus	no	bone and joint	community acquired	gp1	survived	25.7959	79	175	no	no	yes	no	no	no	no	yes	yes	no	no	yes	yes	no	no	no	no	no	no	no	no	2	9	no	no	no	alert	36,1-38,9°C	0	Clindamycin	IV (parenteral)
H2-20-0519-1	Hospital 2	1938	82	2020-09-24	2020-09-30	2020-10-27	male	PREDICT	Training cohort	Staphylococcus aureus	no	cardiovascular; intravasale foreign body	hospital acquired	gp1	survived	28.7317	85	172	no	yes	no	no	yes	no	yes	no	yes	no	no	no	yes	no	no	no	no	no	no	no	no	4	10	no	no	no	alert	36,1-38,9°C	0	Flucloxacillin	IV (parenteral)
H2-20-0522-1	Hospital 2	1950	70	2020-10-02	2020-10-02	2020-11-17	female	PREDICT	Validation cohort	Staphylococcus aureus	no	skin and soft tissue	community acquired	gp1	survived	21.6296	67	176	no	no	no	no	no	no	no	no	no	no	no	no	no	no	yes	yes	no	no	no	no	no	3	11	no	no	no	alert	36,1-38,9°C	0	Piperacillin/Tazobactam	IV (parenteral)
H2-20-0544-1	Hospital 2	1987	33	2020-10-08	2020-10-08	2020-10-20	male	PREDICT	Training cohort	Staphylococcus aureus	no	cardiovascular; intravasale foreign body	community acquired	gp2	survived	19.6052	58	172	no	no	no	no	no	no	no	no	no	no	no	no	no	no	no	no	no	no	no	no	yes	1	1	no	no	no	alert	36,1-38,9°C	0	Piperacillin/Tazobactam	IV (parenteral)
H2-20-0554-1	Hospital 2	1954	66	2020-10-13	2020-10-16	2020-10-23	male	PREDICT	Training cohort	Staphylococcus aureus	no	respiratory	hospital acquired	gp2	diseased	37.037	120	180	no	no	no	no	no	yes	no	no	no	no	no	yes	yes	no	no	no	no	no	no	no	no	2	7	yes	yes	no	stuporous	36,1-38,9°C	6	Flucloxacillin	IV (parenteral)
H2-20-0557-1	Hospital 2	1963	57	2020-10-13	2020-10-16	2020-10-22	male	PREDICT	Training cohort	Staphylococcus aureus	no	skin and soft tissue	hospital acquired	gp1	survived	25.335	83	181	no	no	no	no	no	no	no	no	no	no	no	no	no	no	no	no	no	no	no	no	no	1	1	no	no	no	alert	35,1-36,0°C or 39,0-39,9°C	1	Flucloxacillin	IV (parenteral)
H2-20-0558-1	Hospital 2	1931	89	2020-10-09	2020-10-16	2020-11-27	male	PREDICT	Training cohort	Staphylococcus aureus	no	cardiovascular; intravasale foreign body	hospital acquired	gp1	survived	25.1024	76	174	no	yes	no	no	no	no	yes	yes	no	no	no	no	yes	no	no	no	no	no	no	no	no	4	9	yes	no	no	alert	35,1-36,0°C or 39,0-39,9°C	3	Piperacillin/Tazobactam	IV (parenteral)
H2-20-0560-1	Hospital 2	1949	71	2020-10-15	2020-10-17	2020-10-18	male	PREDICT	Training cohort	Staphylococcus aureus	no	urogenital	hospital acquired	gp1	diseased	37.037	120	180	no	no	yes	no	no	no	no	no	yes	no	no	yes	no	no	yes	yes	no	no	no	no	no	3	15	yes	no	no	stuporous	36,1-38,9°C	4	Piperacillin/Tazobactam	IV (parenteral)
H2-20-0563-1	Hospital 2	1978	42	2020-10-09	2020-10-19	2020-10-30	female	PREDICT	Training cohort	Staphylococcus aureus	no	cardiovascular; intravasale foreign body	hospital acquired	gp1	survived	39.7608	119	173	no	no	no	no	no	no	no	no	no	no	no	no	no	no	no	no	no	no	no	no	no	1	1	yes	no	no	alert	36,1-38,9°C	2	Piperacillin/Tazobactam	IV (parenteral)
H2-20-0564-1	Hospital 2	1952	68	2020-10-14	2020-10-19	2020-11-02	female	PREDICT	Training cohort	Staphylococcus aureus	no	cardiovascular; intravasale foreign body	hospital acquired	gp2	survived	22.5827	60	163	no	no	no	no	no	no	no	no	no	no	no	no	no	no	yes	no	no	no	no	no	no	2	4	no	no	no	alert	36,1-38,9°C	0	Flucloxacillin	IV (parenteral)
H2-20-0573-1	Hospital 2	1961	59	2020-10-22	2020-10-22	2020-11-09	female	PREDICT	Training cohort	Staphylococcus aureus	no	bone and joint; foreign body	community acquired	gp1	survived	25.6369	64	158	no	no	no	no	no	no	no	no	no	no	no	no	no	no	yes	no	no	no	no	no	no	1	3	no	no	no	alert	36,1-38,9°C	0	Piperacillin/Tazobactam	IV (parenteral)
H2-20-0575-1	Hospital 2	1944	76	2020-10-21	2020-10-23	2020-11-10	female	PREDICT	Training cohort	Staphylococcus aureus	no	cardiovascular	hospital acquired	gp1	diseased	23.8751	65	165	no	no	no	no	no	yes	no	no	no	no	no	no	no	no	no	no	no	no	no	no	no	3	4	yes	yes	no	stuporous	36,1-38,9°C	6	Rifampicin	oral
H2-20-0578-1	Hospital 2	1991	29	2020-10-25	2020-10-25	2020-11-24	male	PREDICT	Training cohort	Staphylococcus aureus	no	cardiovascular	community acquired	gp1	survived	20.2449	62	175	no	no	no	no	no	no	no	no	no	no	no	no	no	no	no	no	no	no	no	no	no	1	1	no	no	no	alert	35,1-36,0°C or 39,0-39,9°C	1	Ampicillin/Sulbactam	NA
H2-20-0583-1	Hospital 2	1964	56	2020-10-28	2020-10-28	2020-11-19	male	PREDICT	Training cohort	Staphylococcus aureus	no	cardiovascular	community acquired	gp1	diseased	23.3747	80	185	no	no	no	no	no	no	no	no	no	no	no	no	no	no	no	no	no	no	no	no	no	1	1	yes	no	no	unknown	36,1-38,9°C	2	Flucloxacillin	IV (parenteral)
H2-20-0591-1	Hospital 2	1964	56	2020-11-06	2020-11-06	2020-11-23	female	PREDICT	Training cohort	Staphylococcus aureus	no	cardiovascular; intravasale foreign body	community acquired	gp1	survived	23.0518	62	164	no	no	no	no	no	no	no	no	no	no	yes	no	no	no	no	no	no	no	no	no	no	1	2	yes	no	no	unknown	35,1-36,0°C or 39,0-39,9°C	3	Piperacillin/Tazobactam	IV (parenteral)
H2-20-0599-1	Hospital 2	1934	86	2020-11-08	2020-11-08	2020-11-23	female	PREDICT	Validation cohort	Staphylococcus aureus	no	cardiovascular; intravasale foreign body	community acquired	gp3	diseased	25.6005	79.3000030517578	176	no	yes	no	no	no	no	no	no	no	no	no	no	yes	no	no	no	no	no	no	no	no	4	7	yes	no	no	alert	35,1-36,0°C or 39,0-39,9°C	3	Piperacillin/Tazobactam	IV (parenteral)
H2-20-0601-1	Hospital 2	1959	61	2020-11-10	2020-11-10	2020-12-02	male	PREDICT	Training cohort	Staphylococcus aureus	no	bone and joint; foreign body	community acquired	gp1	survived	29.2359	87.5	173	no	no	no	no	no	no	no	no	no	no	no	no	no	no	yes	yes	no	yes	no	no	no	2	12	no	no	no	alert	36,1-38,9°C	0	Cefazolin	IV (parenteral)
H2-20-0604-1	Hospital 2	1979	41	2020-11-11	2020-11-11	2021-01-14	male	PREDICT	Validation cohort	Staphylococcus aureus	no	respiratory	community acquired	gp1	survived	19.6056	67.0999984741211	185	no	no	no	no	no	no	no	no	no	no	no	no	no	no	no	no	no	no	no	no	no	1	1	no	no	no	alert	36,1-38,9°C	0	Flucloxacillin	IV (parenteral)
H2-20-0607-1	Hospital 2	1955	65	2020-10-24	2020-11-12	2020-11-27	male	PREDICT	Training cohort	Staphylococcus aureus	no	cardiovascular; intravasale foreign body	hospital acquired	gp1	survived	23.9912	83	186	no	yes	no	no	no	no	no	no	no	no	no	no	no	no	no	no	no	no	no	no	no	2	3	no	no	no	alert	35,1-36,0°C or 39,0-39,9°C	1	Vancomycin	IV (parenteral)
H2-20-0609-1	Hospital 2	1973	47	2020-11-13	2020-11-13	2020-12-14	male	PREDICT	Training cohort	Staphylococcus aureus	no	respiratory	community acquired	gp2	survived	20.1769	62.5	176	no	no	no	no	no	yes	no	no	yes	no	no	no	no	no	no	no	no	no	no	no	no	1	3	no	no	no	alert	36,1-38,9°C	0	Ampicillin/Sulbactam	IV (parenteral)
H2-20-0611-1	Hospital 2	1957	63	2020-11-14	2020-11-14	2021-02-04	male	PREDICT	Training cohort	Staphylococcus aureus	no	respiratory	community acquired	gp2	survived	37.037	120	180	no	yes	no	no	no	no	no	no	no	no	no	no	no	no	no	no	no	no	no	no	no	2	3	yes	yes	yes	comatose	=< 35°C oder >= 40°C	14	Ampicillin/Sulbactam	IV (parenteral)
H2-20-0612-1	Hospital 2	1963	57	2020-10-27	2020-11-15	2020-12-03	male	PREDICT	Validation cohort	Staphylococcus aureus	no	skin and soft tissue	hospital acquired	gp1	survived	31.682	106.099998474121	183	no	no	no	no	no	no	no	no	no	yes	no	no	no	no	no	no	no	no	no	no	no	1	4	no	no	no	alert	35,1-36,0°C or 39,0-39,9°C	1	Piperacillin/Tazobactam	IV (parenteral)
H2-20-0631-1	Hospital 2	1953	67	2020-11-21	2020-11-24	2020-11-29	female	PREDICT	Training cohort	Staphylococcus aureus	no	respiratory	hospital acquired	gp3	diseased	unknown	NA	NA	no	no	no	no	no	yes	no	yes	no	no	no	no	no	no	no	no	no	no	no	no	no	2	4	yes	yes	no	stuporous	36,1-38,9°C	6	Imipenem (inkl. Cilastatin)	IV (parenteral)
H2-20-0651-1	Hospital 2	1940	80	2020-11-29	2020-12-05	2021-01-13	male	PREDICT	Validation cohort	Staphylococcus aureus	no	cardiovascular; intravasale foreign body	hospital acquired	gp1	diseased	22.9769	72.8000030517578	178	no	no	no	no	yes	yes	no	no	no	no	no	no	yes	no	no	no	no	no	no	no	no	4	8	yes	no	no	alert	35,1-36,0°C or 39,0-39,9°C	3	Vancomycin	IV (parenteral)
H2-20-0654-1	Hospital 2	1956	64	2020-12-04	2020-12-06	2020-12-23	male	PREDICT	Training cohort	Staphylococcus aureus	no	cardiovascular; intravasale foreign body	hospital acquired	gp1	diseased	23.3887	70	173	no	yes	no	no	no	no	no	no	no	no	no	no	yes	no	no	no	no	no	no	no	no	2	5	yes	no	no	unknown	35,1-36,0°C or 39,0-39,9°C	3	Piperacillin/Tazobactam	IV (parenteral)
H2-20-0656-1	Hospital 2	1949	71	2020-12-07	2020-12-07	2020-12-21	female	PREDICT	Training cohort	Staphylococcus aureus	no	bone and joint	community acquired	gp2	survived	34.4496	86	158	no	no	no	no	no	no	no	no	no	no	no	yes	yes	no	no	no	no	no	no	no	no	3	7	no	no	no	alert	=< 35°C oder >= 40°C	2	Ampicillin/Sulbactam	IV (parenteral)
H2-20-0660-1	Hospital 2	1951	69	2020-12-03	2020-12-08	2020-12-09	female	PREDICT	Validation cohort	Staphylococcus aureus	no	respiratory	hospital acquired	gp2	diseased	20.2812	60	172	no	no	no	no	no	yes	no	no	yes	no	no	no	no	no	no	no	no	no	no	no	no	2	4	yes	yes	no	comatose	36,1-38,9°C	8	Cefazolin	IV (parenteral)
H2-20-0671-1	Hospital 2	1950	70	2020-12-11	2020-12-13	2021-01-08	female	PREDICT	Training cohort	Staphylococcus aureus	no	cardiovascular; intravasale foreign body	hospital acquired	gp2	survived	28.2284	75	163	yes	yes	no	no	no	no	no	no	no	no	no	no	no	no	yes	no	no	no	no	no	no	3	7	no	no	no	alert	36,1-38,9°C	0	Piperacillin/Tazobactam	IV (parenteral)
H2-20-0672-1	Hospital 2	1947	73	2020-12-14	2020-12-14	2021-01-16	male	PREDICT	Training cohort	Staphylococcus aureus	no	cardiovascular; intravasale foreign body	community acquired	gp2	survived	20.3804	69	184	no	yes	no	no	no	no	no	no	no	no	no	no	yes	no	no	no	no	no	no	no	no	3	6	yes	no	no	alert	36,1-38,9°C	2	Vancomycin	IV (parenteral)
H2-20-0714-1	Hospital 2	1943	77	2020-12-31	2020-12-31	2021-01-09	male	PREDICT	Training cohort	Staphylococcus aureus	no	abdominal; foreign body	community acquired	gp1	diseased	20.4783	62	174	no	no	no	no	no	no	no	no	no	no	no	no	no	no	yes	yes	no	no	no	no	no	3	11	unknown	no	no	alert	36,1-38,9°C	0	Piperacillin/Tazobactam	IV (parenteral)
H3-17-0173-1	Hospital 3	1933	84	2017-05-22	2017-06-13	2017-07-13	male	BLOOMY	Training cohort	Staphylococcus aureus	no	cardiovascular	hospital acquired	gp1	survived	26.9896	78	170	no	yes	no	no	no	no	no	no	no	no	yes	no	yes	no	no	no	NA	NA	no	no	no	4	8	no	no	no	alert	35,1-36,0øC or 39,0-39,9øC	1	Ciprofloxacin	IV (parenteral)
H3-17-0179-1	Hospital 3	1939	78	2017-06-17	2017-06-17	2017-06-26	male	BLOOMY	Training cohort	Staphylococcus aureus	no	cardiovascular; intravasale foreign body	community acquired	gp2	survived	26.1224	80	175	no	no	no	no	no	no	no	no	no	no	yes	unknown	yes	no	no	no	NA	NA	no	no	no	3	6	yes	no	no	stuporous	36,1-38,9øC	4	Meropenem	IV (parenteral)
H3-17-0184-1	Hospital 3	1949	68	2017-06-23	2017-06-23	2017-09-13	male	BLOOMY	Training cohort	Staphylococcus aureus	no	cardiovascular	community acquired	gp1	survived	24.4898	75	175	no	no	no	no	no	no	no	no	no	no	no	no	yes	yes	no	no	NA	NA	no	no	no	2	6	no	no	no	alert	36,1-38,9øC	0	Ampicillin	IV (parenteral)
H3-17-0187-1	Hospital 3	1940	77	2017-06-16	2017-06-24	2017-07-19	male	BLOOMY	Training cohort	Staphylococcus aureus	no	cardiovascular; intravasale foreign body	hospital acquired	gp2	survived	34.6021	100	170	no	no	no	NA	yes	no	no	no	no	no	yes	no	no	no	no	no	NA	NA	no	no	no	3	5	no	no	no	disoriented	36,1-38,9øC	1	Piperacillin+Tazobactam	IV (parenteral)
H3-17-0189-1	Hospital 3	1950	67	2017-06-21	2017-06-26	2017-08-05	female	BLOOMY	Training cohort	Staphylococcus aureus	no	cardiovascular; intravasale foreign body	hospital acquired	gp1	survived	23.8367	73	175	no	no	no	no	no	no	no	no	no	no	no	no	no	no	yes	yes	NA	NA	no	no	no	2	10	no	no	no	alert	36,1-38,9øC	0	Piperacillin+Tazobactam	IV (parenteral)
H3-17-0203-1	Hospital 3	1944	73	2017-07-17	2017-07-17	2017-08-07	female	BLOOMY	Training cohort	Staphylococcus aureus	no	respiratory	community acquired	gp1	survived	36.9795	81	148	no	NA	no	no	no	no	no	no	no	no	yes	no	no	no	no	no	NA	NA	no	no	no	3	4	no	no	no	alert	35,1-36,0øC or 39,0-39,9øC	1	Piperacillin+Tazobactam	IV (parenteral)
H3-17-0206-1	Hospital 3	1997	20	2017-07-20	2017-07-20	2017-08-05	male	BLOOMY	Training cohort	Staphylococcus aureus	no	no focus identified	community acquired	gp2	survived	24.2587	76	177	no	no	no	no	no	no	no	no	no	no	no	no	no	no	no	no	NA	NA	no	no	no	1	1	no	no	no	alert	35,1-36,0øC or 39,0-39,9øC	1	Piperacillin+Tazobactam	IV (parenteral)
H3-17-0211-1	Hospital 3	1935	82	2017-07-21	2017-07-25	2017-08-22	female	BLOOMY	Training cohort	Staphylococcus aureus	no	cardiovascular	hospital acquired	gp1	survived	27.2817	77	168	no	yes	no	no	no	no	no	no	no	no	no	no	no	no	no	no	NA	NA	no	no	no	4	5	unknown	no	no	alert	36,1-38,9øC	0	Flucloxacillin	IV (parenteral)
H3-17-0215-1	Hospital 3	1992	25	2017-07-25	2017-07-28	2017-08-06	male	BLOOMY	Training cohort	Staphylococcus aureus	no	cardiovascular	hospital acquired	gp1	survived	21.6049	70	180	no	no	no	no	no	no	no	no	no	no	no	no	no	no	no	no	NA	NA	no	no	no	1	1	no	no	no	alert	35,1-36,0øC or 39,0-39,9øC	1	Flucloxacillin	IV (parenteral)
H3-17-0222-1	Hospital 3	1957	60	2017-07-25	2017-08-02	2017-08-10	male	BLOOMY	Training cohort	Staphylococcus aureus	no	cardiovascular; intravasale foreign body	hospital acquired	gp1	survived	23.5666	73	176	no	no	no	no	no	no	no	no	no	no	no	no	no	no	yes	no	NA	NA	no	no	no	2	4	no	no	no	alert	36,1-38,9øC	0	Piperacillin+Tazobactam	IV (parenteral)
H3-17-0251-1	Hospital 3	1938	79	2017-08-28	2017-08-28	2017-09-06	male	BLOOMY	Training cohort	Staphylococcus aureus	no	cardiovascular; intravasale foreign body	community acquired	gp1	survived	23.6614	70	172	yes	yes	yes	no	no	unknown	no	no	no	no	yes	no	no	no	yes	unknown	NA	NA	no	no	no	3	9	unknown	no	no	alert	35,1-36,0øC or 39,0-39,9øC	1	Piperacillin+Tazobactam	IV (parenteral)
H3-17-0252-1	Hospital 3	1936	81	2017-08-28	2017-08-28	2017-10-12	male	BLOOMY	Training cohort	Staphylococcus aureus	no	cardiovascular; intravasale foreign body	community acquired	gp1	survived	22.9854	68	172	no	no	no	no	no	no	no	no	no	no	no	no	no	no	yes	yes	NA	NA	no	no	no	4	12	no	no	no	alert	35,1-36,0øC or 39,0-39,9øC	1	Ampicillin+Sulbactam	IV (parenteral)
H3-17-0297-1	Hospital 3	1965	52	2017-09-24	2017-10-02	2017-10-27	male	BLOOMY	Validation cohort	Staphylococcus aureus	no	cardiovascular; intravasale foreign body	hospital acquired	gp1	survived	20.0617	65	180	no	no	no	no	no	no	no	no	no	no	no	no	no	no	yes	no	NA	NA	no	no	no	1	3	no	no	no	alert	35,1-36,0øC or 39,0-39,9øC	1	Sultamicillin	IV (parenteral)
H3-17-0327-1	Hospital 3	1962	55	2017-10-04	2017-10-22	2017-11-10	male	BLOOMY	Training cohort	Staphylococcus aureus	no	skin and soft tissue	hospital acquired	gp2	survived	30.7394	92	173	no	no	no	NA	yes	no	no	no	no	no	no	no	no	no	no	no	NA	NA	no	no	no	1	2	no	yes	no	comatose	36,1-38,9øC	6	Piperacillin+Tazobactam	IV (parenteral)
H3-17-0337-1	Hospital 3	1934	83	2017-10-26	2017-10-27	2017-12-17	male	BLOOMY	Validation cohort	Staphylococcus aureus	no	skin and soft tissue	community acquired	gp3	diseased	27.4286	84	175	no	yes	yes	no	no	no	no	no	yes	no	no	yes	yes	no	no	no	NA	NA	no	no	no	4	11	no	no	no	alert	36,1-38,9øC	0	Meropenem	IV (parenteral)
H3-17-0348-1	Hospital 3	1925	92	2017-11-01	2017-11-01	2017-11-21	male	BLOOMY	Training cohort	Staphylococcus aureus	no	cardiovascular	community acquired	gp3	survived	27.2173	75	166	yes	yes	no	no	yes	no	no	no	no	no	no	no	no	no	yes	no	NA	NA	no	no	no	5	10	no	no	no	alert	36,1-38,9øC	0	Piperacillin+Tazobactam	IV (parenteral)
H3-17-0353-1	Hospital 3	1930	87	2017-10-26	2017-11-04	2017-11-17	female	BLOOMY	Validation cohort	Staphylococcus aureus	no	cardiovascular; intravasale foreign body	hospital acquired	gp2	survived	24.8016	70	168	no	unknown	no	no	no	no	unknown	unknown	no	no	no	no	no	no	no	no	NA	NA	no	no	no	4	4	no	no	no	alert	36,1-38,9øC	0	Piperacillin+Tazobactam	IV (parenteral)
H4-17-0071-1	Hospital 4	1953	64	2017-02-27	2017-03-01	2017-05-01	female	BLOOMY	Validation cohort	Staphylococcus aureus	no	skin and soft tissue	hospital acquired	gp3	diseased	unknown	NA	NA	no	yes	unknown	no	no	no	no	no	unknown	no	yes	no	yes	no	no	no	NA	NA	no	NA	NA	2	6	unknown	no	no	unknown	36,1-38,9øC	0	Ceftriaxon	NA
H4-17-0077-1	Hospital 4	1967	50	2017-03-16	2017-03-16	2017-04-12	male	BLOOMY	Training cohort	Staphylococcus aureus	no	skin and soft tissue	community acquired	gp1	survived	26.5731	75	168	no	no	no	no	no	unknown	no	yes	no	yes	no	no	yes	no	no	no	NA	NA	no	NA	NA	1	7	no	no	no	alert	36,1-38,9øC	0	Metronidazol	IV (parenteral)
H4-17-0081-1	Hospital 4	1980	37	2017-03-19	2017-03-19	2017-03-24	male	BLOOMY	Training cohort	Staphylococcus aureus	no	urogenital	community acquired	gp2	survived	21.6049	70	180	no	no	no	no	no	no	no	unknown	unknown	no	yes	no	no	no	no	no	NA	NA	no	NA	NA	1	2	no	no	no	alert	35,1-36,0øC or 39,0-39,9øC	1	Cefotaxim	IV (parenteral)
H4-17-0084-1	Hospital 4	1941	76	2017-03-10	2017-03-10	2017-04-14	male	BLOOMY	Validation cohort	Staphylococcus aureus	yes	urogenital	community acquired	gp1	diseased	25.9516	75	170	no	no	unknown	no	no	unknown	no	unknown	no	no	no	yes	no	no	no	no	NA	NA	no	NA	NA	3	5	no	no	no	alert	35,1-36,0øC or 39,0-39,9øC	1	Linezolid	IV (parenteral)
H4-17-0087-1	Hospital 4	1942	75	2017-02-20	2017-02-28	2017-03-30	female	BLOOMY	Training cohort	Staphylococcus aureus	no	skin and soft tissue	hospital acquired	gp1	survived	27.1416	73	164	no	no	unknown	no	no	no	no	unknown	unknown	no	no	no	no	no	yes	no	NA	NA	no	NA	NA	3	5	no	no	no	alert	36,1-38,9øC	0	Moxifloxacin	IV (parenteral)
H4-17-0088-1	Hospital 4	1955	62	2017-03-12	2017-03-12	2017-04-07	male	BLOOMY	Training cohort	Staphylococcus aureus	no	respiratory	community acquired	gp2	survived	24.4536	81	182	no	no	no	no	no	unknown	yes	no	no	no	NA	yes	no	no	yes	yes	NA	NA	no	NA	NA	2	13	no	no	no	alert	36,1-38,9øC	0	Piperacillin+Tazobactam	IV (parenteral)
H4-17-0091-1	Hospital 4	1960	57	2017-03-12	2017-03-12	2017-03-22	male	BLOOMY	Training cohort	Staphylococcus aureus	no	cardiovascular; intravasale foreign body	community acquired	gp2	diseased	unknown	NA	NA	no	yes	no	no	no	unknown	no	yes	unknown	unknown	no	no	yes	no	no	no	NA	NA	no	NA	NA	1	5	unknown	unknown	unknown	unknown	36,1-38,9øC	0	Piperacillin+Tazobactam	IV (parenteral)
H4-17-0096-1	Hospital 4	1971	46	2017-03-20	2017-03-21	2017-05-16	male	BLOOMY	Training cohort	Staphylococcus aureus	yes	bone and joint	community acquired	gp1	survived	29.5369	100	184	no	no	no	no	no	yes	no	unknown	unknown	unknown	no	no	no	no	no	no	NA	NA	no	NA	NA	1	2	no	no	no	alert	35,1-36,0øC or 39,0-39,9øC	1	Vancomycin	IV (parenteral)
H4-17-0100-1	Hospital 4	1959	58	2017-03-23	2017-03-29	2017-04-05	female	BLOOMY	Training cohort	Staphylococcus aureus	no	abdominal	hospital acquired	gp1	survived	26.2917	69	162	no	no	unknown	no	no	yes	no	unknown	no	no	no	no	no	no	no	no	NA	NA	no	NA	NA	1	2	no	no	no	alert	36,1-38,9øC	0	Ciprofloxacin	oral
H4-17-0102-1	Hospital 4	1956	61	2017-03-19	2017-03-29	2017-05-11	female	BLOOMY	Training cohort	Staphylococcus aureus	no	respiratory	hospital acquired	gp1	survived	19.8141	52	162	no	unknown	yes	no	no	yes	no	no	unknown	no	no	no	no	no	no	no	NA	NA	no	NA	NA	2	4	no	yes	no	alert	36,1-38,9øC	2	Metronidazol	oral
H4-17-0105-1	Hospital 4	1935	82	2017-03-27	2017-03-31	2017-04-01	male	BLOOMY	Training cohort	Staphylococcus aureus	no	no focus identified	hospital acquired	gp2	diseased	unknown	NA	NA	yes	yes	unknown	no	unknown	no	no	no	no	no	no	no	yes	no	no	no	NA	NA	no	NA	NA	4	8	no	no	no	alert	36,1-38,9øC	0	Flucloxacillin	IV (parenteral)
H4-17-0115-1	Hospital 4	1927	90	2017-03-27	2017-04-09	2017-04-11	male	BLOOMY	Training cohort	Staphylococcus aureus	no	urogenital	hospital acquired	gp1	diseased	unknown	NA	NA	no	yes	unknown	no	no	unknown	no	unknown	yes	no	no	no	yes	no	yes	no	NA	NA	no	NA	NA	5	11	no	no	no	alert	36,1-38,9øC	0	Piperacillin+Tazobactam	IV (parenteral)
H4-17-0126-1	Hospital 4	1927	90	2017-04-10	2017-04-18	2017-05-25	female	BLOOMY	Training cohort	Staphylococcus aureus	no	urogenital	hospital acquired	gp3	diseased	28.2284	75	163	no	unknown	no	no	no	no	unknown	no	no	no	unknown	unknown	yes	no	unknown	no	NA	NA	no	NA	NA	5	7	no	no	no	alert	36,1-38,9øC	0	Piperacillin+Tazobactam	IV (parenteral)
H4-17-0134-1	Hospital 4	1937	80	2017-04-24	2017-04-24	2017-05-22	female	BLOOMY	Training cohort	Staphylococcus aureus	no	bone and joint	community acquired	gp3	survived	25.2363	63	158	no	no	no	no	no	yes	yes	no	no	no	no	no	yes	no	no	no	NA	NA	no	NA	NA	4	8	no	no	no	disoriented	35,1-36,0øC or 39,0-39,9øC	2	Ampicillin+Sulbactam	IV (parenteral)
H4-17-0139-1	Hospital 4	1944	73	2017-04-23	2017-04-23	2017-04-28	male	BLOOMY	Training cohort	Staphylococcus aureus	no	respiratory	community acquired	gp1	diseased	unknown	NA	NA	no	no	unknown	no	no	yes	no	yes	no	no	no	yes	yes	no	no	no	NA	NA	no	NA	NA	3	9	yes	no	no	alert	36,1-38,9øC	2	Piperacillin+Tazobactam	NA
H4-17-0156-1	Hospital 4	1944	73	2017-05-11	2017-05-12	2017-06-21	male	BLOOMY	Validation cohort	Staphylococcus aureus	no	cardiovascular; intravasale foreign body	community acquired	gp2	survived	unknown	NA	NA	no	no	no	no	no	yes	no	no	no	no	no	yes	yes	yes	yes	yes	NA	NA	no	NA	NA	3	18	no	no	no	disoriented	36,1-38,9øC	1	Flucloxacillin	IV (parenteral)
H4-17-0164-1	Hospital 4	1963	54	2017-04-20	2017-05-21	2017-06-16	male	BLOOMY	Training cohort	Staphylococcus aureus	no	cardiovascular; intravasale foreign body	hospital acquired	gp2	survived	42.2526	125	172	no	yes	yes	no	no	yes	no	no	yes	no	no	yes	yes	no	no	no	NA	NA	no	NA	NA	1	9	no	no	no	alert	36,1-38,9øC	0	Vancomycin	IV (parenteral)
H4-17-0174-1	Hospital 4	1938	79	2017-05-24	2017-06-01	2017-06-07	male	BLOOMY	Training cohort	Staphylococcus aureus	no	abdominal	hospital acquired	gp1	survived	24.2215	70	170	no	no	no	no	no	no	no	yes	no	no	no	no	no	no	yes	yes	NA	NA	no	NA	NA	3	12	no	no	no	alert	36,1-38,9øC	0	Piperacillin+Tazobactam	IV (parenteral)
H4-17-0181-1	Hospital 4	1942	75	2017-06-08	2017-06-08	2017-07-07	male	BLOOMY	Validation cohort	Staphylococcus aureus	no	cardiovascular	community acquired	gp1	diseased	26.5285	85	179	no	no	no	no	no	no	yes	no	no	no	no	no	no	no	no	no	NA	NA	no	NA	NA	3	4	yes	no	no	disoriented	35,1-36,0øC or 39,0-39,9øC	4	Ceftriaxon	IV (parenteral)
H4-17-0183-1	Hospital 4	1943	74	2017-05-31	2017-06-07	2017-06-23	female	BLOOMY	Training cohort	Staphylococcus aureus	no	respiratory	hospital acquired	gp2	diseased	unknown	NA	NA	yes	yes	yes	unknown	no	no	no	no	no	no	no	yes	no	no	no	no	NA	NA	no	NA	NA	3	8	no	no	no	unknown	36,1-38,9øC	0	Vancomycin	IV (parenteral)
H4-17-0185-1	Hospital 4	1944	73	2017-06-11	2017-06-11	2017-06-23	male	BLOOMY	Training cohort	Staphylococcus aureus	no	respiratory	community acquired	gp1	survived	27.4406	85	176	no	no	no	no	no	no	no	unknown	yes	unknown	no	no	yes	no	unknown	unknown	NA	NA	no	NA	NA	3	6	yes	no	no	disoriented	35,1-36,0øC or 39,0-39,9øC	4	Ceftriaxon	IV (parenteral)
H4-17-0190-1	Hospital 4	1940	77	2017-06-05	2017-06-14	2017-06-23	male	BLOOMY	Training cohort	Staphylococcus aureus	no	cardiovascular; intravasale foreign body	hospital acquired	gp2	survived	20.5986	66	179	no	no	no	no	yes	no	no	no	no	no	no	no	no	no	yes	no	NA	NA	no	NA	NA	3	6	no	no	no	disoriented	35,1-36,0øC or 39,0-39,9øC	2	Cefotaxim	IV (parenteral)
H4-17-0191-1	Hospital 4	1931	86	2017-05-29	2017-06-14	2017-07-19	female	BLOOMY	Training cohort	Staphylococcus aureus	no	cardiovascular; intravasale foreign body	hospital acquired	gp1	survived	41.6233	100	155	unknown	yes	no	no	NA	yes	no	no	unknown	no	yes	unknown	yes	no	yes	yes	NA	NA	no	NA	NA	4	17	no	no	no	disoriented	36,1-38,9øC	1	Ampicillin+Sulbactam	IV (parenteral)
H4-17-0192-1	Hospital 4	1942	75	2017-06-15	2017-06-15	2017-07-05	male	BLOOMY	Training cohort	Staphylococcus aureus	yes	respiratory	community acquired	gp3	survived	unknown	47	NA	no	no	no	no	yes	yes	no	yes	no	no	no	no	no	no	yes	yes	NA	NA	no	NA	NA	3	14	no	no	no	alert	36,1-38,9øC	0	Ceftriaxon	IV (parenteral)
H4-17-0193-1	Hospital 4	1945	72	2017-06-15	2017-06-15	2017-07-06	female	BLOOMY	Validation cohort	Staphylococcus aureus	no	cardiovascular; intravasale foreign body	community acquired	gp1	survived	26.1066	66	159	no	no	no	no	no	no	no	no	no	no	no	no	no	no	no	no	NA	NA	no	NA	NA	3	3	no	no	no	alert	36,1-38,9øC	0	Flucloxacillin	IV (parenteral)
H4-17-0207-1	Hospital 4	1953	64	2017-06-25	2017-06-25	2017-07-14	male	BLOOMY	Validation cohort	Staphylococcus aureus	no	bone and joint	community acquired	gp1	survived	33.3947	107	179	no	no	no	no	no	no	no	no	no	no	yes	no	no	no	no	no	NA	NA	no	NA	NA	2	3	no	no	no	disoriented	36,1-38,9øC	1	Flucloxacillin	IV (parenteral)
H4-17-0216-1	Hospital 4	1970	47	2017-06-29	2017-06-29	2017-07-20	male	BLOOMY	Training cohort	Staphylococcus aureus	no	cardiovascular; intravasale foreign body	community acquired	gp3	survived	27.102	83	175	no	no	no	no	yes	no	no	no	no	no	no	yes	yes	no	no	no	NA	NA	no	NA	NA	1	6	no	no	no	alert	36,1-38,9øC	0	Ampicillin+Sulbactam	IV (parenteral)
H4-17-0224-1	Hospital 4	1950	67	2017-06-27	2017-07-07	2017-07-20	male	BLOOMY	Validation cohort	Staphylococcus aureus	yes	cardiovascular; intravasale foreign body	hospital acquired	gp1	survived	26.5759	89	183	yes	yes	no	NA	yes	no	no	no	no	no	no	no	unknown	no	no	no	NA	NA	no	NA	NA	2	5	yes	no	no	alert	36,1-38,9øC	2	Ceftriaxon	IV (parenteral)
H4-17-0229-1	Hospital 4	1952	65	2017-07-11	2017-07-12	2017-07-24	female	BLOOMY	Training cohort	Staphylococcus aureus	no	bone and joint	community acquired	gp1	survived	34.9277	85	156	no	no	no	no	no	no	no	no	no	no	no	yes	unknown	no	no	no	NA	NA	no	NA	NA	2	4	no	no	no	alert	36,1-38,9øC	0	Flucloxacillin	IV (parenteral)
H4-17-0230-1	Hospital 4	1932	85	2017-07-06	2017-07-11	2017-07-20	male	BLOOMY	Training cohort	Staphylococcus aureus	no	skin and soft tissue	hospital acquired	gp1	survived	28.2828	77	165	no	unknown	no	no	no	no	no	no	no	no	no	no	yes	no	no	no	NA	NA	no	NA	NA	4	6	no	no	no	alert	36,1-38,9øC	0	Cefazolin	IV (parenteral)
H4-17-0231-1	Hospital 4	1946	71	2017-07-04	2017-07-14	2017-09-01	female	BLOOMY	Training cohort	Staphylococcus aureus	no	cardiovascular	hospital acquired	gp2	survived	40.7877	93	151	no	no	no	no	yes	yes	yes	no	no	no	no	yes	no	no	no	no	NA	NA	no	NA	NA	3	8	no	no	no	alert	36,1-38,9øC	0	Piperacillin+Tazobactam	IV (parenteral)
H4-17-0239-1	Hospital 4	1943	74	2017-07-17	2017-07-17	2017-07-18	male	BLOOMY	Training cohort	Staphylococcus aureus	no	respiratory	community acquired	gp1	diseased	unknown	NA	NA	yes	unknown	no	no	no	no	no	no	no	no	no	no	no	no	no	no	NA	NA	no	NA	NA	3	4	unknown	no	no	stuporous	36,1-38,9øC	2	Piperacillin+Tazobactam	NA
H4-17-0252-1	Hospital 4	1948	69	2017-07-21	2017-07-25	2017-08-09	male	BLOOMY	Validation cohort	Staphylococcus aureus	no	cardiovascular; intravasale foreign body	hospital acquired	gp1	survived	29.4078	87	172	no	no	yes	no	no	no	no	no	no	no	yes	no	no	no	no	no	NA	NA	no	NA	NA	2	4	no	no	no	alert	36,1-38,9øC	0	Cefazolin	IV (parenteral)
H4-17-0269-1	Hospital 4	1937	80	2017-08-08	2017-08-08	2017-09-30	male	BLOOMY	Training cohort	Staphylococcus aureus	no	cardiovascular; intravasale foreign body	community acquired	gp1	diseased	20.061	52	161	unknown	unknown	yes	no	no	yes	no	unknown	no	no	yes	unknown	yes	no	yes	yes	NA	NA	no	no	no	4	17	no	no	no	disoriented	36,1-38,9øC	1	Piperacillin+Tazobactam	IV (parenteral)
H4-17-0270-1	Hospital 4	1940	77	2017-08-09	2017-08-09	2017-08-17	male	BLOOMY	Training cohort	Staphylococcus aureus	no	cardiovascular; intravasale foreign body	community acquired	gp2	survived	unknown	NA	NA	yes	unknown	unknown	no	no	yes	no	unknown	unknown	unknown	no	yes	yes	no	no	no	NA	NA	no	no	no	3	9	yes	no	no	stuporous	36,1-38,9øC	4	Piperacillin+Tazobactam	IV (parenteral)
H4-17-0273-1	Hospital 4	1938	79	2017-08-13	2017-08-13	2017-08-15	male	BLOOMY	Validation cohort	Staphylococcus aureus	no	cardiovascular; intravasale foreign body	community acquired	gp2	diseased	30.3461	94	176	no	no	unknown	no	no	no	no	no	no	no	no	no	yes	no	no	no	NA	NA	no	no	no	3	5	yes	no	no	alert	36,1-38,9øC	2	Piperacillin+Tazobactam	IV (parenteral)
H4-17-0275-1	Hospital 4	1937	80	2017-08-14	2017-08-14	2017-09-05	female	BLOOMY	Validation cohort	Staphylococcus aureus	no	no focus identified	community acquired	gp3	survived	25.8166	72	167	no	yes	no	unknown	no	no	no	yes	no	no	no	no	yes	no	no	no	NA	NA	no	no	no	4	8	no	no	no	alert	35,1-36,0øC or 39,0-39,9øC	1	Flucloxacillin	IV (parenteral)
H4-17-0279-1	Hospital 4	1961	56	2017-08-07	2017-08-18	2017-09-13	male	BLOOMY	Training cohort	Staphylococcus aureus	no	cardiovascular; intravasale foreign body	hospital acquired	gp2	survived	29.7004	92	176	no	no	yes	no	no	no	no	no	no	no	no	no	no	no	no	no	NA	NA	no	no	no	1	2	no	no	no	alert	36,1-38,9øC	0	Piperacillin+Tazobactam	IV (parenteral)
H4-17-0282-1	Hospital 4	1940	77	2017-08-19	2017-08-20	2017-09-18	female	BLOOMY	Training cohort	Staphylococcus aureus	no	abdominal	community acquired	gp2	survived	23.9361	59	157	no	no	no	no	no	no	no	no	no	yes	no	no	no	no	yes	unknown	NA	NA	no	no	no	3	8	no	no	no	alert	36,1-38,9øC	0	Flucloxacillin	IV (parenteral)
H4-17-0288-1	Hospital 4	1924	93	2017-08-29	2017-08-29	2017-09-08	male	BLOOMY	Validation cohort	Staphylococcus aureus	no	cardiovascular; intravasale foreign body	community acquired	gp1	survived	unknown	NA	NA	yes	no	no	no	no	no	no	no	no	no	no	no	yes	no	no	no	NA	NA	no	no	no	5	8	unknown	no	no	alert	36,1-38,9øC	0	Piperacillin+Tazobactam	IV (parenteral)
H4-17-0294-1	Hospital 4	1948	69	2017-08-21	2017-09-04	2017-11-08	male	BLOOMY	Training cohort	Staphylococcus aureus	no	cardiovascular	hospital acquired	gp2	survived	35.8915	115	179	yes	unknown	yes	no	no	yes	no	no	no	no	no	yes	no	no	yes	unknown	NA	NA	no	no	no	2	9	no	no	no	alert	36,1-38,9øC	0	Ampicillin+Sulbactam	IV (parenteral)
H4-17-0301-1	Hospital 4	1934	83	2017-09-07	2017-09-07	2017-09-14	male	BLOOMY	Training cohort	Staphylococcus aureus	no	other	community acquired	gp1	survived	21.4619	68	178	no	unknown	no	no	no	no	no	no	no	no	no	no	no	no	yes	no	NA	NA	no	no	no	4	6	no	no	no	disoriented	35,1-36,0øC or 39,0-39,9øC	2	Piperacillin+Tazobactam	IV (parenteral)
H4-17-0314-1	Hospital 4	1930	87	2017-09-13	2017-09-13	2017-09-23	female	BLOOMY	Validation cohort	Staphylococcus aureus	yes	urogenital	community acquired	gp2	survived	unknown	NA	NA	no	no	no	yes	yes	no	no	no	unknown	unknown	yes	no	no	no	unknown	no	NA	NA	no	no	no	4	7	no	no	no	alert	36,1-38,9øC	0	Sultamicillin	oral
H4-17-0315-1	Hospital 4	1959	58	2017-09-09	2017-09-13	2017-09-27	female	BLOOMY	Training cohort	Staphylococcus aureus	no	skin and soft tissue	hospital acquired	gp1	survived	43.8523	104	154	yes	yes	unknown	no	no	yes	no	no	no	no	no	no	no	no	no	no	NA	NA	no	no	no	1	4	no	no	no	alert	36,1-38,9øC	0	Ampicillin+Sulbactam	IV (parenteral)
H4-17-0326-1	Hospital 4	1955	62	2017-09-17	2017-09-23	2018-02-12	male	BLOOMY	Validation cohort	Staphylococcus aureus	no	skin and soft tissue	hospital acquired	gp2	survived	23.6614	70	172	yes	no	yes	no	no	unknown	no	no	no	no	no	no	no	no	no	no	NA	NA	no	no	no	2	4	no	no	no	disoriented	36,1-38,9øC	1	Piperacillin+Tazobactam	IV (parenteral)
H4-17-0333-1	Hospital 4	1925	92	2017-09-29	2017-09-29	2017-10-05	female	BLOOMY	Training cohort	Staphylococcus aureus	no	skin and soft tissue	community acquired	gp1	diseased	unknown	NA	NA	no	no	no	no	no	unknown	unknown	no	no	no	yes	no	no	no	no	no	NA	NA	no	no	no	5	6	no	no	no	disoriented	35,1-36,0øC or 39,0-39,9øC	2	Cefuroxim-Natrium	IV (parenteral)
H4-17-0338-1	Hospital 4	1957	60	2017-09-29	2017-09-29	2017-11-01	male	BLOOMY	Training cohort	Staphylococcus aureus	yes	bone and joint	community acquired	gp1	survived	unknown	NA	NA	no	no	unknown	no	no	yes	no	yes	no	no	no	no	no	no	yes	unknown	NA	NA	no	no	no	2	6	unknown	unknown	unknown	alert	36,1-38,9øC	0	Linezolid	IV (parenteral)
H4-17-0341-1	Hospital 4	1941	76	2017-09-17	2017-10-05	2017-10-27	female	BLOOMY	Training cohort	Staphylococcus aureus	yes	bone and joint	hospital acquired	gp2	diseased	unknown	NA	NA	no	no	yes	yes	no	no	no	no	no	no	no	no	no	no	no	no	NA	NA	no	no	no	3	5	no	no	no	alert	36,1-38,9øC	0	Linezolid	IV (parenteral)
H4-17-0351-1	Hospital 4	1952	65	2017-09-30	2017-10-10	2017-10-19	male	BLOOMY	Training cohort	Staphylococcus aureus	no	respiratory	hospital acquired	gp1	survived	28.4302	107	194	yes	no	unknown	no	no	no	no	no	no	no	no	yes	no	no	no	no	NA	NA	no	no	no	2	5	no	no	no	alert	35,1-36,0øC or 39,0-39,9øC	1	Ceftriaxon	IV (parenteral)
H4-17-0352-1	Hospital 4	1968	49	2017-10-12	2017-10-12	2017-10-27	female	BLOOMY	Training cohort	Staphylococcus aureus	no	cardiovascular; intravasale foreign body	community acquired	gp2	survived	32.2385	101	177	no	no	no	no	no	no	no	no	no	no	no	no	no	no	yes	yes	NA	NA	no	no	no	1	9	unknown	no	no	alert	35,1-36,0øC or 39,0-39,9øC	1	Ceftriaxon	IV (parenteral)
H4-17-0353-1	Hospital 4	1964	53	2017-10-12	2017-10-13	2017-11-07	male	BLOOMY	Training cohort	Staphylococcus aureus	no	cardiovascular	community acquired	gp1	survived	24.7365	96	197	no	no	no	no	no	no	no	no	no	no	no	no	no	no	no	no	NA	NA	no	no	no	1	1	no	no	no	alert	35,1-36,0øC or 39,0-39,9øC	1	Flucloxacillin	IV (parenteral)
H4-17-0363-1	Hospital 4	1942	75	2017-10-18	2017-10-18	2017-11-07	female	BLOOMY	Training cohort	Staphylococcus aureus	no	bone and joint; foreign body	community acquired	gp1	survived	33.8972	105	176	unknown	unknown	unknown	no	no	no	no	no	no	no	yes	unknown	yes	no	no	no	NA	NA	no	no	no	3	6	yes	no	no	unknown	36,1-38,9øC	2	Cefotaxim	IV (parenteral)
H4-17-0369-1	Hospital 4	1941	76	2017-10-17	2017-10-23	2017-11-08	male	BLOOMY	Training cohort	Staphylococcus aureus	no	cardiovascular; intravasale foreign body	hospital acquired	gp1	survived	27.7634	86	176	no	unknown	no	no	no	no	no	no	no	no	no	no	no	no	no	no	NA	NA	no	no	no	3	3	no	no	no	alert	36,1-38,9øC	0	other antibiotic substance	oral
H4-17-0381-1	Hospital 4	1932	85	2017-10-28	2017-10-28	2017-10-30	female	BLOOMY	Validation cohort	Staphylococcus aureus	no	abdominal	community acquired	gp1	diseased	unknown	NA	NA	yes	yes	unknown	unknown	no	no	no	no	no	no	no	yes	yes	no	no	no	NA	NA	no	no	no	4	10	unknown	unknown	unknown	unknown	36,1-38,9øC	0	Piperacillin+Tazobactam	IV (parenteral)
H4-17-0388-1	Hospital 4	1935	82	2017-11-04	2017-11-04	2017-11-22	female	BLOOMY	Validation cohort	Staphylococcus aureus	no	cardiovascular; intravasale foreign body	community acquired	gp2	survived	28.089	88	177	yes	no	yes	no	no	no	no	no	no	no	no	yes	yes	no	no	no	NA	NA	no	no	no	4	10	yes	no	no	disoriented	35,1-36,0øC or 39,0-39,9øC	4	Linezolid	IV (parenteral)
H4-17-0396-1	Hospital 4	1958	59	2017-11-10	2017-11-10	2017-11-16	male	BLOOMY	Training cohort	Staphylococcus aureus	no	respiratory	community acquired	gp2	survived	23.7654	77	180	no	no	unknown	no	no	yes	no	no	no	no	no	no	no	no	no	no	NA	NA	no	no	no	1	2	no	no	no	alert	36,1-38,9øC	0	Ceftriaxon	IV (parenteral)
H4-17-0401-1	Hospital 4	1971	46	2017-10-30	2017-11-11	2017-12-12	male	BLOOMY	Validation cohort	Staphylococcus aureus	no	bone and joint	hospital acquired	gp1	survived	25.2493	80	178	no	no	no	no	no	no	no	no	yes	no	no	no	no	no	no	no	NA	NA	no	no	no	1	2	no	no	no	alert	36,1-38,9øC	0	Ampicillin+Sulbactam	IV (parenteral)
H4-17-0403-1	Hospital 4	1972	45	2017-11-06	2017-11-15	2017-11-22	female	BLOOMY	Training cohort	Staphylococcus aureus	no	cardiovascular; intravasale foreign body	hospital acquired	gp2	survived	15.2353	43	168	no	no	no	no	no	no	no	no	yes	no	no	no	no	no	no	no	NA	NA	no	no	no	1	2	no	no	no	alert	36,1-38,9øC	0	Vancomycin	IV (parenteral)
H4-17-0405-1	Hospital 4	1926	91	2017-11-15	2017-11-15	2017-12-21	female	BLOOMY	Training cohort	Staphylococcus aureus	no	cardiovascular	community acquired	gp2	survived	23.0469	59	160	no	yes	no	unknown	no	no	no	no	no	no	no	no	no	no	no	no	NA	NA	no	no	no	5	6	no	no	no	alert	36,1-38,9øC	0	Ampicillin+Sulbactam	IV (parenteral)
H4-17-0412-1	Hospital 4	1931	86	2017-11-23	2017-11-23	2017-12-08	female	BLOOMY	Training cohort	Staphylococcus aureus	no	no focus identified	community acquired	gp1	survived	25.2363	63	158	no	no	no	no	no	yes	no	no	no	no	no	no	no	no	no	no	NA	NA	no	no	no	4	5	no	no	no	alert	35,1-36,0øC or 39,0-39,9øC	1	Ceftriaxon	IV (parenteral)
H4-17-0416-1	Hospital 4	1986	31	2017-11-20	2017-11-25	2017-11-30	female	BLOOMY	Training cohort	Staphylococcus aureus	no	cardiovascular; intravasale foreign body	hospital acquired	gp1	survived	unknown	NA	NA	no	no	no	no	no	no	no	no	no	no	no	no	no	no	no	no	NA	NA	no	no	no	1	1	unknown	no	no	alert	35,1-36,0øC or 39,0-39,9øC	1	Flucloxacillin	IV (parenteral)
H4-17-0425-1	Hospital 4	1944	73	2017-11-24	2017-12-02	2017-12-02	male	BLOOMY	Validation cohort	Staphylococcus aureus	no	respiratory	hospital acquired	gp3	diseased	unknown	NA	NA	yes	no	yes	no	no	unknown	no	no	unknown	unknown	no	no	no	no	no	no	NA	NA	no	no	no	3	5	unknown	yes	unknown	comatose	36,1-38,9øC	6	Ceftriaxon	IV (parenteral)
H4-17-0430-1	Hospital 4	1958	59	2017-12-05	2017-12-05	2017-12-21	male	BLOOMY	Training cohort	Staphylococcus aureus	no	cardiovascular; intravasale foreign body	community acquired	gp1	survived	28.327	98	186	no	no	no	no	no	yes	no	no	unknown	no	no	no	no	no	yes	yes	NA	NA	no	no	no	1	10	no	no	no	alert	35,1-36,0øC or 39,0-39,9øC	1	Ampicillin+Sulbactam	IV (parenteral)
H4-17-0433-1	Hospital 4	1931	86	2017-12-11	2017-12-11	2017-12-18	male	BLOOMY	Training cohort	Staphylococcus aureus	no	urogenital	community acquired	gp1	survived	24.6181	78	178	no	no	no	no	no	no	no	no	no	no	no	no	no	no	no	no	NA	NA	no	no	no	4	4	no	no	no	alert	36,1-38,9øC	0	Ampicillin+Sulbactam	IV (parenteral)
H4-17-0436-1	Hospital 4	1947	70	2017-11-23	2017-12-18	2017-12-29	male	BLOOMY	Training cohort	Staphylococcus aureus	no	urogenital	hospital acquired	gp1	survived	24.3554	87	189	no	no	yes	no	yes	no	no	yes	no	no	no	yes	yes	no	no	no	NA	NA	no	no	no	3	10	no	no	no	disoriented	36,1-38,9øC	1	Ciprofloxacin	oral
H4-17-0438-1	Hospital 4	1936	81	2017-12-14	2017-12-19	2017-12-29	female	BLOOMY	Training cohort	Staphylococcus aureus	no	respiratory	hospital acquired	gp1	survived	19.9594	55	166	yes	yes	unknown	no	no	no	no	no	no	no	no	no	no	no	no	no	NA	NA	no	no	no	4	6	no	no	no	disoriented	=< 35øC oder >= 40øC	3	Flucloxacillin	IV (parenteral)
H4-17-0441-1	Hospital 4	1931	86	2017-12-06	2017-12-20	2017-12-21	female	BLOOMY	Training cohort	Staphylococcus aureus	no	respiratory	hospital acquired	gp2	diseased	unknown	NA	NA	no	yes	yes	yes	no	yes	no	no	no	no	no	no	no	no	no	no	NA	NA	no	no	no	4	8	yes	no	no	unknown	36,1-38,9øC	2	Meropenem	NA
H4-17-0443-1	Hospital 4	1965	52	2017-12-12	2017-12-24	2018-02-08	male	BLOOMY	Validation cohort	Staphylococcus aureus	no	respiratory	hospital acquired	gp2	survived	unknown	NA	NA	no	no	yes	yes	unknown	unknown	no	yes	no	no	no	no	no	no	yes	unknown	NA	NA	no	no	no	1	6	unknown	no	no	unknown	35,1-36,0øC or 39,0-39,9øC	1	Flucloxacillin	IV (parenteral)
H4-18-0006-1	Hospital 4	1957	61	2018-01-03	2018-01-03	2018-01-11	male	BLOOMY	Training cohort	Staphylococcus aureus	no	respiratory	community acquired	gp2	survived	19.8839	63	178	no	no	no	no	no	no	no	no	no	no	no	no	no	no	yes	no	NA	NA	no	no	no	2	4	no	no	no	alert	36,1-38,9øC	0	Ampicillin+Sulbactam	IV (parenteral)
H4-18-0008-1	Hospital 4	1940	78	2018-01-05	2018-01-06	2018-04-16	male	BLOOMY	Validation cohort	Staphylococcus aureus	no	abdominal	community acquired	gp2	survived	unknown	NA	NA	no	yes	unknown	no	no	no	no	no	no	no	no	yes	yes	no	no	no	NA	NA	no	no	no	3	8	yes	no	no	alert	36,1-38,9øC	2	Meropenem	IV (parenteral)
H4-18-0015-1	Hospital 4	1937	81	2018-01-07	2018-01-08	2018-01-09	male	BLOOMY	Training cohort	Staphylococcus aureus	no	bone and joint	community acquired	gp1	diseased	unknown	NA	NA	no	no	no	unknown	no	no	yes	no	no	no	no	no	no	no	no	no	NA	NA	no	no	no	4	5	yes	no	no	alert	36,1-38,9øC	2	Meropenem	IV (parenteral)
H4-18-0018-1	Hospital 4	1939	79	2018-01-09	2018-01-09	2018-01-23	male	BLOOMY	Training cohort	Staphylococcus aureus	no	urogenital	community acquired	gp1	survived	unknown	NA	NA	no	no	no	no	yes	no	no	no	no	no	no	no	no	no	no	no	NA	NA	no	no	no	3	4	no	no	no	disoriented	36,1-38,9øC	1	Ceftriaxon	IV (parenteral)
H4-18-0025-1	Hospital 4	1961	57	2018-01-16	2018-01-16	2018-01-18	male	BLOOMY	Training cohort	Staphylococcus aureus	no	cardiovascular; intravasale foreign body	community acquired	gp3	diseased	unknown	NA	NA	yes	yes	unknown	no	no	yes	no	no	no	no	no	yes	no	no	no	no	NA	NA	no	no	no	1	6	unknown	no	no	alert	36,1-38,9øC	0	other antibiotic substance	IV (parenteral)
H4-18-0026-1	Hospital 4	1986	32	2018-01-18	2018-01-18	2018-01-31	male	BLOOMY	Training cohort	Staphylococcus aureus	no	respiratory	community acquired	gp1	survived	23.9591	82	185	no	no	no	no	no	yes	no	no	no	no	yes	no	yes	no	no	no	NA	NA	no	no	no	1	5	no	no	no	alert	35,1-36,0øC or 39,0-39,9øC	1	Piperacillin+Tazobactam	IV (parenteral)
H4-18-0033-1	Hospital 4	1949	69	2018-01-21	2018-01-21	2018-02-01	male	BLOOMY	Training cohort	Staphylococcus aureus	no	no focus identified	community acquired	gp1	survived	36.1682	107	172	no	yes	unknown	no	no	yes	no	no	unknown	no	no	yes	unknown	no	NA	no	NA	NA	no	no	no	2	6	no	no	no	disoriented	36,1-38,9øC	1	Clarithromycin	IV (parenteral)
H4-18-0035-1	Hospital 4	1935	83	2018-01-22	2018-01-22	2018-02-06	female	BLOOMY	Training cohort	Staphylococcus aureus	no	skin and soft tissue	community acquired	gp1	survived	26.6667	60	150	no	no	yes	no	no	no	no	no	no	no	yes	no	no	no	no	no	NA	NA	no	no	no	4	6	unknown	no	no	alert	35,1-36,0øC or 39,0-39,9øC	1	Cefuroxim-Natrium	IV (parenteral)
H4-18-0038-1	Hospital 4	1950	68	2018-01-24	2018-01-24	2018-01-24	female	BLOOMY	Validation cohort	Staphylococcus aureus	no	respiratory	community acquired	gp1	diseased	unknown	NA	NA	no	no	no	no	no	yes	no	no	no	no	no	no	no	no	yes	yes	NA	NA	no	no	no	2	11	no	no	no	alert	35,1-36,0øC or 39,0-39,9øC	1	NA	NA
H4-18-0047-1	Hospital 4	1955	63	2018-01-29	2018-01-29	2018-02-23	male	BLOOMY	Validation cohort	Staphylococcus aureus	no	skin and soft tissue	community acquired	gp1	survived	32.0988	104	180	yes	no	no	no	no	yes	no	no	no	no	no	yes	no	no	no	no	NA	NA	no	no	no	2	6	unknown	unknown	unknown	unknown	36,1-38,9øC	0	Ampicillin+Sulbactam	IV (parenteral)
H4-18-0049-1	Hospital 4	1952	66	2018-01-29	2018-01-29	2018-02-26	male	BLOOMY	Training cohort	Staphylococcus aureus	no	skin and soft tissue	community acquired	gp1	survived	19.3906	70	190	no	no	yes	no	no	no	no	yes	no	no	yes	no	no	no	no	no	NA	NA	no	no	no	2	5	no	no	no	alert	36,1-38,9øC	0	Meropenem	IV (parenteral)
H4-18-0077-1	Hospital 4	1937	81	2018-02-22	2018-02-22	2018-02-23	male	BLOOMY	Validation cohort	Staphylococcus aureus	no	respiratory	community acquired	gp1	survived	unknown	NA	NA	no	no	no	no	no	no	no	no	no	no	no	no	unknown	no	yes	yes	NA	NA	no	no	no	4	12	yes	yes	no	alert	=< 35øC oder >= 40øC	6	Piperacillin+Tazobactam	IV (parenteral)
H4-18-0089-1	Hospital 4	1921	97	2018-03-07	2018-03-08	2018-03-09	female	BLOOMY	Training cohort	Staphylococcus aureus	no	respiratory	community acquired	gp1	diseased	14.5184	46	178	no	no	no	yes	yes	no	no	no	no	no	no	no	yes	no	no	no	no	no	no	no	no	5	9	no	no	no	alert	36,1-38,9øC	0	Ampicillin+Sulbactam	IV (parenteral)
H4-18-0103-1	Hospital 4	1954	64	2018-01-12	2018-03-15	2018-04-27	male	BLOOMY	Validation cohort	Staphylococcus aureus	no	no focus identified	hospital acquired	gp1	diseased	20.0474	60	173	no	yes	yes	no	no	no	no	no	no	no	yes	no	no	no	no	no	no	no	no	no	no	2	5	no	no	no	alert	36,1-38,9øC	0	Ampicillin+Sulbactam	IV (parenteral)
H4-18-0106-1	Hospital 4	1969	49	2018-03-05	2018-03-16	2018-04-13	male	BLOOMY	Training cohort	Staphylococcus aureus	no	bone and joint	hospital acquired	gp2	survived	30.2469	98	180	no	yes	no	no	no	no	no	no	no	no	no	no	yes	no	no	no	no	no	no	no	no	1	4	no	no	no	alert	36,1-38,9øC	0	Meropenem	NA
H4-18-0110-1	Hospital 4	1941	77	2018-02-20	2018-03-22	2018-03-28	male	BLOOMY	Training cohort	Staphylococcus aureus	no	skin and soft tissue	hospital acquired	gp2	diseased	unknown	NA	NA	no	yes	yes	no	no	no	no	no	no	no	no	yes	yes	no	yes	yes	no	no	no	no	no	3	17	yes	no	no	alert	36,1-38,9øC	2	Ceftriaxon	IV (parenteral)
H4-18-0112-1	Hospital 4	1930	88	2018-03-23	2018-03-23	2018-04-05	female	BLOOMY	Training cohort	Staphylococcus aureus	no	cardiovascular; intravasale foreign body	community acquired	gp2	survived	20.5457	50	156	NA	yes	no	no	no	no	no	no	no	no	no	no	no	no	no	no	no	no	no	no	no	4	5	no	no	no	alert	35,1-36,0øC or 39,0-39,9øC	1	Clarithromycin	oral
H4-18-0118-1	Hospital 4	1983	35	2018-03-26	2018-03-28	2018-04-27	male	BLOOMY	Training cohort	Staphylococcus aureus	no	cardiovascular	hospital acquired	gp1	survived	23.4586	67	169	no	no	no	no	no	no	no	no	no	no	no	no	no	no	no	no	no	no	no	no	no	1	1	unknown	yes	no	comatose	36,1-38,9øC	6	Meropenem	IV (parenteral)
H4-18-0120-1	Hospital 4	1981	37	2018-03-30	2018-03-30	2018-04-04	female	BLOOMY	Training cohort	Staphylococcus aureus	no	cardiovascular	community acquired	gp2	survived	24.7252	74	173	no	no	no	no	no	no	no	no	no	no	no	no	no	no	no	no	no	no	no	NA	no	1	1	no	no	no	alert	=< 35øC oder >= 40øC	2	Piperacillin+Tazobactam	IV (parenteral)
H4-18-0123-1	Hospital 4	1939	79	2018-03-20	2018-04-03	2018-04-19	female	BLOOMY	Training cohort	Staphylococcus aureus	no	no focus identified	hospital acquired	gp1	survived	28.764	70	156	no	yes	no	no	no	no	yes	no	no	no	no	no	no	no	no	no	no	no	no	no	no	3	5	unknown	no	no	disoriented	35,1-36,0øC or 39,0-39,9øC	2	Ceftriaxon	IV (parenteral)
H4-18-0125-1	Hospital 4	1926	92	2018-04-08	2018-04-08	2018-04-25	female	BLOOMY	Training cohort	Staphylococcus aureus	no	skin and soft tissue	community acquired	gp1	survived	unknown	NA	NA	no	no	yes	no	no	no	no	no	no	no	no	yes	no	no	no	no	no	no	no	no	no	5	8	no	no	no	alert	36,1-38,9øC	0	Ceftriaxon	IV (parenteral)
H4-18-0130-1	Hospital 4	1941	77	2018-03-31	2018-04-11	2018-04-29	male	BLOOMY	Validation cohort	Staphylococcus aureus	no	cardiovascular; intravasale foreign body	hospital acquired	gp2	survived	27.4445	97	188	no	no	no	yes	no	no	no	no	yes	no	yes	no	no	no	no	no	no	no	no	no	no	3	6	no	no	no	alert	36,1-38,9øC	0	Ceftriaxon	IV (parenteral)
H4-18-0133-1	Hospital 4	1947	71	2018-04-09	2018-04-15	2018-05-27	male	BLOOMY	Training cohort	Staphylococcus aureus	yes	cardiovascular	hospital acquired	gp1	diseased	unknown	NA	NA	no	yes	no	no	no	no	no	no	no	no	no	no	yes	no	no	no	no	no	no	no	no	3	6	unknown	yes	no	comatose	36,1-38,9øC	6	Vancomycin	IV (parenteral)
H4-18-0135-1	Hospital 4	1950	68	2018-04-16	2018-04-16	2018-05-02	male	BLOOMY	Training cohort	Staphylococcus aureus	no	no focus identified	community acquired	gp1	survived	26.8274	85	178	no	no	yes	no	no	yes	no	no	no	no	no	no	no	no	yes	no	no	no	no	no	no	2	6	unknown	no	no	alert	36,1-38,9øC	0	other antibiotic substance	IV (parenteral)
H4-18-0137-1	Hospital 4	1946	72	2018-03-27	2018-04-18	2018-04-27	male	BLOOMY	Training cohort	Staphylococcus aureus	no	no focus identified	hospital acquired	gp1	survived	23.8895	74	176	no	no	no	no	no	no	no	no	no	yes	no	no	yes	no	no	no	no	no	no	no	no	3	8	no	no	no	alert	36,1-38,9øC	0	other antibiotic substance	oral
H4-18-0140-1	Hospital 4	1976	42	2018-04-15	2018-04-18	2018-05-29	female	BLOOMY	Training cohort	Staphylococcus aureus	no	skin and soft tissue	hospital acquired	gp1	survived	42.3855	114	164	no	no	no	no	no	no	yes	no	no	no	no	no	no	no	no	no	no	no	no	no	no	1	2	no	no	no	alert	36,1-38,9øC	0	Piperacillin+Tazobactam	IV (parenteral)
H4-18-0150-1	Hospital 4	1955	63	2018-04-30	2018-04-30	2018-05-10	female	BLOOMY	Training cohort	Staphylococcus aureus	yes	cardiovascular; intravasale foreign body	community acquired	gp2	survived	34.2058	92	164	no	no	no	no	no	yes	no	no	no	no	no	no	no	no	no	no	no	no	no	no	no	2	3	no	no	no	alert	36,1-38,9øC	0	Meropenem	IV (parenteral)
H4-18-0153-1	Hospital 4	1942	76	2018-05-02	2018-05-02	2018-05-14	male	BLOOMY	Training cohort	Staphylococcus aureus	no	cardiovascular; intravasale foreign body	community acquired	gp1	survived	unknown	65	NA	yes	yes	yes	no	no	no	no	no	no	no	no	no	yes	no	no	no	no	no	no	no	no	3	8	no	no	no	alert	36,1-38,9øC	0	Cefuroxim-Natrium	IV (parenteral)
H4-18-0155-1	Hospital 4	1964	54	2018-05-01	2018-05-01	2018-05-16	male	BLOOMY	Validation cohort	Staphylococcus aureus	no	urogenital	community acquired	gp1	survived	22.0932	70	178	no	no	no	no	no	no	no	no	no	no	no	no	NA	no	no	no	no	no	no	no	yes	1	1	no	no	no	alert	36,1-38,9øC	0	Cefotaxim	IV (parenteral)
H4-18-0157-1	Hospital 4	1934	84	2018-04-30	2018-05-02	2018-05-19	female	BLOOMY	Training cohort	Staphylococcus aureus	no	cardiovascular; intravasale foreign body	hospital acquired	gp2	survived	23.8751	65	165	no	no	no	no	no	no	yes	no	no	no	no	no	no	no	yes	no	no	no	no	no	no	4	7	no	no	no	alert	=< 35øC oder >= 40øC	2	Ampicillin+Sulbactam	IV (parenteral)
H4-18-0159-1	Hospital 4	1933	85	2018-05-08	2018-05-08	2018-05-15	male	BLOOMY	Training cohort	Staphylococcus aureus	no	urogenital	community acquired	gp1	survived	21.4476	75	187	no	yes	no	no	no	yes	no	no	yes	no	no	no	no	no	no	no	no	no	no	no	no	4	7	no	no	no	alert	36,1-38,9øC	0	Cefotaxim	IV (parenteral)
H4-18-0161-1	Hospital 4	1962	56	2018-05-08	2018-05-08	2018-07-25	male	BLOOMY	Training cohort	Staphylococcus aureus	no	cardiovascular	community acquired	gp2	survived	unknown	NA	NA	unknown	no	unknown	no	yes	unknown	unknown	unknown	unknown	unknown	no	no	unknown	unknown	unknown	unknown	unknown	unknown	no	no	NA	1	2	yes	no	no	disoriented	36,1-38,9øC	3	Metronidazol	oral
H4-18-0162-1	Hospital 4	1966	52	2018-05-07	2018-05-09	2018-05-16	male	BLOOMY	Training cohort	Staphylococcus aureus	no	abdominal	hospital acquired	gp1	survived	28.089	90	179	no	no	no	no	no	no	no	yes	no	yes	no	no	no	no	no	no	no	no	no	no	NA	1	5	no	no	no	alert	36,1-38,9øC	0	Ampicillin+Sulbactam	IV (parenteral)
H4-18-0170-1	Hospital 4	1964	54	2018-05-14	2018-05-15	2018-05-31	female	BLOOMY	Training cohort	Staphylococcus aureus	no	skin and soft tissue	community acquired	gp1	survived	31.7418	95	173	no	no	no	no	no	no	no	no	no	no	no	no	no	no	no	no	no	no	no	no	no	1	1	no	no	no	alert	36,1-38,9øC	0	Vancomycin	IV (parenteral)
H4-18-0175-1	Hospital 4	1922	96	2018-05-19	2018-05-19	2018-05-21	female	BLOOMY	Validation cohort	Staphylococcus aureus	yes	abdominal	community acquired	gp1	diseased	unknown	NA	NA	no	no	no	no	no	no	no	yes	no	no	no	no	yes	no	no	no	no	no	no	no	no	5	8	yes	no	no	disoriented	=< 35øC oder >= 40øC	5	Piperacillin+Tazobactam	IV (parenteral)
H4-18-0178-1	Hospital 4	1963	55	2018-05-19	2018-05-20	2018-07-31	female	BLOOMY	Training cohort	Staphylococcus aureus	no	cardiovascular	community acquired	gp1	survived	46.7495	160	185	no	no	no	no	no	no	no	no	no	no	yes	no	yes	no	no	no	no	no	no	no	no	1	4	yes	no	no	stuporous	35,1-36,0øC or 39,0-39,9øC	5	Ceftriaxon	IV (parenteral)
H4-18-0183-1	Hospital 4	1936	82	2018-05-14	2018-05-26	2018-06-11	male	BLOOMY	Validation cohort	Staphylococcus aureus	no	respiratory	hospital acquired	gp1	survived	43.2395	137	178	no	yes	no	no	yes	no	no	no	no	no	no	yes	no	no	no	no	no	no	no	no	no	4	8	no	no	no	stuporous	36,1-38,9øC	2	Ampicillin+Sulbactam	IV (parenteral)
H4-18-0190-1	Hospital 4	1961	57	2018-05-29	2018-05-29	2018-06-04	male	BLOOMY	Validation cohort	Staphylococcus aureus	no	respiratory	community acquired	gp1	survived	28.2933	100	188	no	no	no	no	no	no	no	no	no	no	no	no	no	no	no	no	no	no	no	no	no	1	1	no	no	no	alert	36,1-38,9øC	0	Ceftriaxon	IV (parenteral)
H4-18-0196-1	Hospital 4	1964	54	2018-06-03	2018-06-03	2018-06-12	female	BLOOMY	Validation cohort	Staphylococcus aureus	no	no focus identified	community acquired	gp1	survived	30.0232	93	176	yes	no	no	no	no	no	no	no	no	no	no	no	no	no	no	no	no	no	no	no	yes	1	2	no	no	no	alert	=< 35øC oder >= 40øC	2	Piperacillin+Tazobactam	IV (parenteral)
H4-18-0199-1	Hospital 4	1934	84	2018-06-02	2018-06-04	2018-06-29	male	BLOOMY	Validation cohort	Staphylococcus aureus	no	skin and soft tissue	hospital acquired	gp1	survived	20.984	65	176	yes	no	no	no	no	no	no	no	no	no	no	no	no	no	no	no	no	no	no	no	no	4	5	no	no	no	alert	35,1-36,0øC or 39,0-39,9øC	1	Ceftriaxon	IV (parenteral)
H4-18-0213-1	Hospital 4	1948	70	2018-06-04	2018-06-13	2018-07-06	male	BLOOMY	Training cohort	Staphylococcus aureus	no	respiratory	hospital acquired	gp2	survived	34.6431	111	179	yes	no	yes	no	no	no	no	no	no	no	yes	no	no	no	yes	no	no	no	no	no	no	3	8	no	no	no	alert	35,1-36,0øC or 39,0-39,9øC	1	Ceftriaxon	IV (parenteral)
H4-18-0214-1	Hospital 4	1957	61	2018-06-07	2018-06-14	2018-10-18	female	BLOOMY	Training cohort	Staphylococcus aureus	no	cardiovascular	hospital acquired	gp2	survived	33.7925	92	165	no	no	yes	no	no	no	no	no	no	no	no	no	no	yes	no	no	no	no	no	no	no	2	5	no	no	no	alert	35,1-36,0øC or 39,0-39,9øC	1	Piperacillin+Tazobactam	IV (parenteral)
H4-18-0220-1	Hospital 4	1936	82	2018-06-17	2018-06-17	2018-06-26	female	BLOOMY	Validation cohort	Staphylococcus aureus	no	skin and soft tissue	community acquired	gp2	survived	25.3515	75	172	no	no	no	no	no	no	yes	no	yes	no	no	no	yes	no	yes	no	no	no	no	no	no	4	10	no	no	no	alert	35,1-36,0øC or 39,0-39,9øC	1	Ampicillin+Sulbactam	IV (parenteral)
H4-18-0228-1	Hospital 4	1942	76	2018-06-22	2018-06-22	2018-07-20	male	BLOOMY	Validation cohort	Staphylococcus aureus	yes	skin and soft tissue	community acquired	gp3	survived	29.3945	105	189	no	no	yes	no	no	no	no	no	no	no	no	yes	no	no	no	no	no	no	no	no	no	3	6	no	no	no	alert	36,1-38,9øC	0	Vancomycin	IV (parenteral)
H4-18-0231-1	Hospital 4	1942	76	2018-06-24	2018-06-24	2018-08-10	male	BLOOMY	Training cohort	Staphylococcus aureus	no	cardiovascular	community acquired	gp1	survived	28.7037	93	180	no	no	no	no	no	no	no	no	no	no	no	yes	yes	no	no	no	no	no	no	no	no	3	7	no	no	no	alert	35,1-36,0øC or 39,0-39,9øC	1	Ampicillin+Sulbactam	IV (parenteral)
H4-18-0240-1	Hospital 4	1960	58	2018-06-29	2018-06-29	2018-07-18	male	BLOOMY	Training cohort	Staphylococcus aureus	no	cardiovascular; intravasale foreign body	community acquired	gp1	survived	unknown	NA	NA	no	yes	no	no	no	no	no	no	no	no	no	no	no	no	no	no	no	no	no	no	no	1	2	no	no	no	alert	36,1-38,9øC	0	Clindamycin	IV (parenteral)
H4-18-0246-1	Hospital 4	1946	72	2018-06-29	2018-07-05	2018-07-13	male	BLOOMY	Training cohort	Staphylococcus aureus	no	cardiovascular; intravasale foreign body	hospital acquired	gp4	survived	25.5354	80	177	no	yes	yes	no	no	no	no	no	no	no	no	no	no	no	yes	no	no	no	no	no	yes	3	7	no	no	no	disoriented	36,1-38,9øC	1	Ampicillin+Sulbactam	IV (parenteral)
H4-18-0247-1	Hospital 4	1938	80	2018-06-26	2018-07-05	2018-07-13	male	BLOOMY	Training cohort	Staphylococcus aureus	no	abdominal	hospital acquired	gp2	survived	28.327	98	186	no	no	no	no	no	no	no	no	no	no	no	no	no	no	yes	no	no	no	no	no	no	4	6	no	no	no	alert	36,1-38,9øC	0	Piperacillin+Tazobactam	IV (parenteral)
H4-18-0253-1	Hospital 4	1927	91	2018-07-08	2018-07-08	2018-07-24	female	BLOOMY	Training cohort	Staphylococcus aureus	no	no focus identified	community acquired	gp1	survived	25.7778	58	150	no	no	no	no	no	no	no	no	no	no	no	no	no	no	no	no	no	no	no	no	no	5	5	no	no	no	alert	36,1-38,9øC	0	Ceftriaxon	IV (parenteral)
H4-18-0256-1	Hospital 4	1939	79	2018-07-09	2018-07-10	2018-07-27	male	BLOOMY	Training cohort	Staphylococcus aureus	yes	cardiovascular; intravasale foreign body	community acquired	gp2	diseased	unknown	NA	NA	no	yes	yes	no	no	no	no	no	no	no	no	yes	yes	no	no	no	no	no	no	no	no	3	9	yes	no	no	alert	36,1-38,9øC	2	Piperacillin+Tazobactam	IV (parenteral)
H4-18-0258-1	Hospital 4	1944	74	2018-07-03	2018-07-11	2018-09-20	female	BLOOMY	Validation cohort	Staphylococcus aureus	no	skin and soft tissue	hospital acquired	gp3	survived	38.1039	100	162	NA	NA	NA	NA	NA	NA	NA	NA	NA	NA	NA	NA	yes	NA	NA	NA	NA	NA	NA	no	NA	3	5	no	no	no	alert	36,1-38,9øC	0	Piperacillin+Tazobactam	IV (parenteral)
H4-18-0268-1	Hospital 4	1936	82	2018-07-22	2018-07-22	2018-08-09	female	BLOOMY	Training cohort	Staphylococcus aureus	no	skin and soft tissue	community acquired	gp2	survived	27.6817	80	170	no	no	no	no	no	no	yes	no	yes	no	no	no	no	no	yes	no	no	no	no	no	no	4	8	no	no	no	alert	35,1-36,0øC or 39,0-39,9øC	1	Clarithromycin	oral
H4-18-0271-1	Hospital 4	1935	83	2018-06-19	2018-07-24	2018-08-09	male	BLOOMY	Training cohort	Staphylococcus aureus	no	cardiovascular; intravasale foreign body	hospital acquired	gp1	survived	26.2164	84	179	no	yes	no	no	no	yes	no	no	no	no	no	no	yes	no	no	no	no	no	no	no	yes	4	8	yes	no	no	disoriented	35,1-36,0øC or 39,0-39,9øC	4	Levofloxacin	IV (parenteral)
H4-18-0275-1	Hospital 4	1947	71	2018-07-02	2018-07-12	2018-08-16	male	BLOOMY	Training cohort	Staphylococcus aureus	no	bone and joint	hospital acquired	gp1	survived	23.6713	75	178	no	no	no	no	no	no	no	no	no	no	no	no	no	no	no	no	no	no	no	no	no	3	3	no	no	no	alert	36,1-38,9øC	0	Flucloxacillin	IV (parenteral)
H4-18-0285-1	Hospital 4	1944	74	2018-07-31	2018-07-31	2018-08-09	male	BLOOMY	Training cohort	Staphylococcus aureus	no	no focus identified	community acquired	gp1	survived	24.7843	83	183	no	yes	no	no	no	yes	no	no	no	no	yes	no	no	no	no	no	no	no	no	no	no	3	6	no	no	no	alert	36,1-38,9øC	0	Ceftriaxon	IV (parenteral)
H4-18-0289-1	Hospital 4	1949	69	2018-06-25	2018-08-03	2018-08-27	male	BLOOMY	Validation cohort	Staphylococcus aureus	no	bone and joint	hospital acquired	gp1	survived	25.8806	82	178	no	no	yes	no	no	no	no	no	no	no	yes	no	no	no	no	no	no	no	no	no	no	2	4	no	no	no	alert	35,1-36,0øC or 39,0-39,9øC	1	Moxifloxacin	oral
H4-18-0295-1	Hospital 4	1936	82	2018-08-08	2018-08-08	2018-08-28	male	BLOOMY	Training cohort	Staphylococcus aureus	no	respiratory	community acquired	gp1	diseased	unknown	NA	NA	no	no	no	no	no	no	no	no	no	no	no	no	no	no	yes	no	no	no	no	no	no	4	6	no	no	no	disoriented	35,1-36,0øC or 39,0-39,9øC	2	Ceftriaxon	IV (parenteral)
H4-18-0298-1	Hospital 4	1930	88	2018-08-09	2018-08-09	2018-08-11	male	BLOOMY	Training cohort	Staphylococcus aureus	no	respiratory	community acquired	gp1	diseased	21.6788	75	186	no	yes	no	no	no	yes	no	no	no	no	no	no	no	no	no	no	no	no	no	no	no	4	6	no	yes	no	alert	36,1-38,9øC	2	Ampicillin+Sulbactam	IV (parenteral)
H4-18-0299-1	Hospital 4	1957	61	2018-08-05	2018-08-05	2018-08-22	male	BLOOMY	Training cohort	Staphylococcus aureus	no	bone and joint	hospital acquired	gp1	survived	unknown	NA	NA	no	no	no	no	no	no	no	no	no	no	no	no	no	no	no	no	no	no	no	no	no	2	2	no	no	no	alert	36,1-38,9øC	0	Piperacillin+Tazobactam	IV (parenteral)
H4-18-0301-1	Hospital 4	1931	87	2018-08-06	2018-08-09	2018-08-17	male	BLOOMY	Training cohort	Staphylococcus aureus	no	cardiovascular; intravasale foreign body	hospital acquired	gp2	survived	25.0574	83	182	no	no	no	no	no	no	no	no	no	no	yes	no	no	no	yes	no	no	no	no	no	no	4	7	no	no	no	alert	35,1-36,0øC or 39,0-39,9øC	1	Ceftriaxon	IV (parenteral)
H4-18-0306-1	Hospital 4	1978	40	2018-08-11	2018-08-12	2018-09-21	male	BLOOMY	Training cohort	Staphylococcus aureus	no	cardiovascular	community acquired	gp2	survived	unknown	NA	NA	no	no	no	no	no	no	no	no	yes	no	no	no	no	no	no	no	no	no	no	no	no	1	2	no	no	no	alert	=< 35øC oder >= 40øC	2	Ampicillin+Sulbactam	IV (parenteral)
H4-18-0309-1	Hospital 4	1950	68	2018-03-13	2018-08-15	2019-01-19	female	BLOOMY	Validation cohort	Staphylococcus aureus	no	urogenital	hospital acquired	gp1	diseased	25.0399	69	166	no	no	no	no	no	no	no	no	no	no	no	no	no	no	yes	yes	no	no	no	no	no	2	10	unknown	no	no	alert	35,1-36,0øC or 39,0-39,9øC	1	Piperacillin+Tazobactam	IV (parenteral)
H4-18-0319-1	Hospital 4	1951	67	2018-08-22	2018-08-22	2018-09-03	male	BLOOMY	Validation cohort	Staphylococcus aureus	no	respiratory	community acquired	gp2	survived	34.6861	120	186	no	no	no	no	no	no	no	no	no	no	no	yes	no	no	yes	no	no	no	no	no	no	2	6	no	no	no	disoriented	35,1-36,0øC or 39,0-39,9øC	2	Ampicillin+Sulbactam	IV (parenteral)
H4-18-0322-1	Hospital 4	1933	85	2018-08-23	2018-08-23	2018-09-20	female	BLOOMY	Validation cohort	Staphylococcus aureus	no	cardiovascular; intravasale foreign body	community acquired	gp1	survived	21.7079	62	169	no	no	no	no	no	no	no	no	no	no	yes	no	no	no	yes	no	no	no	no	no	no	4	7	no	no	no	alert	35,1-36,0øC or 39,0-39,9øC	1	Ampicillin	IV (parenteral)
H4-18-0323-1	Hospital 4	1962	56	2018-08-16	2018-08-24	2018-09-07	male	BLOOMY	Training cohort	Staphylococcus aureus	no	abdominal	hospital acquired	gp1	survived	20.0066	67	183	no	no	no	no	no	no	yes	no	no	no	yes	no	no	no	yes	yes	no	no	no	no	no	1	11	no	no	no	alert	36,1-38,9øC	0	Ciprofloxacin	oral
H4-18-0328-1	Hospital 4	1958	60	2018-08-25	2018-08-25	2018-09-24	male	BLOOMY	Training cohort	Staphylococcus aureus	no	cardiovascular; intravasale foreign body	community acquired	gp1	survived	22.5981	70	176	no	yes	no	no	no	no	no	no	no	no	no	no	no	no	no	no	no	no	no	no	no	2	3	no	no	no	disoriented	36,1-38,9øC	1	Flucloxacillin	IV (parenteral)
H4-18-0329-1	Hospital 4	1948	70	2018-08-27	2018-08-27	2018-09-06	female	BLOOMY	Validation cohort	Staphylococcus aureus	no	respiratory	community acquired	gp2	survived	19.3772	56	170	no	no	no	no	no	no	no	no	no	no	no	no	no	no	no	no	no	no	no	no	no	3	3	no	no	no	alert	36,1-38,9øC	0	Ceftriaxon	IV (parenteral)
H4-18-0333-1	Hospital 4	1936	82	2018-08-30	2018-08-30	2018-09-11	male	BLOOMY	Training cohort	Staphylococcus aureus	no	cardiovascular; intravasale foreign body	community acquired	gp1	survived	30.4367	89	171	no	no	no	unknown	no	no	no	no	no	no	no	no	no	no	yes	no	no	yes	no	no	no	4	8	no	no	no	alert	35,1-36,0øC or 39,0-39,9øC	1	Vancomycin	IV (parenteral)
H4-18-0335-1	Hospital 4	1931	87	2018-08-30	2018-08-31	2018-09-01	female	BLOOMY	Training cohort	Staphylococcus aureus	no	respiratory	community acquired	gp3	diseased	21.3333	48	150	no	no	no	no	yes	no	no	no	no	no	no	no	no	no	no	no	no	no	no	no	no	4	5	yes	no	no	disoriented	36,1-38,9øC	3	Ampicillin+Sulbactam	IV (parenteral)
H4-18-0344-1	Hospital 4	1950	68	2018-09-04	2018-09-05	2018-09-12	male	BLOOMY	Training cohort	Staphylococcus aureus	no	urogenital	community acquired	gp1	survived	28.7197	83	170	no	yes	no	no	no	yes	no	no	no	no	yes	no	no	no	no	no	no	no	no	no	no	2	5	no	no	no	alert	35,1-36,0øC or 39,0-39,9øC	1	Ampicillin+Sulbactam	IV (parenteral)
H4-18-0350-1	Hospital 4	1939	79	2018-08-31	2018-09-10	2018-09-19	male	BLOOMY	Training cohort	Staphylococcus aureus	no	no focus identified	hospital acquired	gp1	survived	unknown	NA	NA	no	yes	no	no	no	no	no	no	no	no	yes	no	yes	no	no	no	no	no	no	no	no	3	7	no	no	no	alert	36,1-38,9øC	0	Ceftriaxon	IV (parenteral)
H4-18-0359-1	Hospital 4	1936	82	2018-09-03	2018-09-12	2018-10-29	female	BLOOMY	Training cohort	Staphylococcus aureus	yes	respiratory	hospital acquired	gp4	survived	unknown	NA	NA	no	no	no	no	no	no	no	no	no	no	no	no	no	no	no	no	no	no	no	no	no	4	4	no	no	no	disoriented	36,1-38,9øC	1	Ceftriaxon	IV (parenteral)
H4-18-0364-1	Hospital 4	1964	54	2018-09-03	2018-09-16	2018-09-21	male	BLOOMY	Training cohort	Staphylococcus aureus	no	cardiovascular; intravasale foreign body	hospital acquired	gp1	survived	26.0146	90	186	no	no	no	no	no	no	no	no	no	no	no	no	yes	no	no	no	no	no	no	no	no	1	3	no	no	no	alert	35,1-36,0øC or 39,0-39,9øC	1	Sultamicillin	oral
H4-18-0368-1	Hospital 4	1941	77	2018-09-20	2018-09-20	2018-10-09	male	BLOOMY	Training cohort	Staphylococcus aureus	no	urogenital	community acquired	gp1	survived	30.4688	78	160	no	no	no	no	no	no	no	no	no	no	no	no	no	no	yes	no	no	no	no	no	no	3	5	no	no	no	alert	=< 35øC oder >= 40øC	2	Levofloxacin	oral
H4-18-0370-1	Hospital 4	1937	81	2018-09-20	2018-09-20	2018-10-02	male	BLOOMY	Validation cohort	Staphylococcus aureus	no	cardiovascular; intravasale foreign body	community acquired	gp3	diseased	unknown	NA	NA	yes	yes	no	no	yes	no	no	no	no	no	no	no	yes	no	no	no	no	no	no	no	no	4	9	no	yes	no	comatose	36,1-38,9øC	6	Gentamicin	IV (parenteral)
H4-18-0372-1	Hospital 4	1929	89	2018-09-19	2018-09-20	2018-10-01	male	BLOOMY	Training cohort	Staphylococcus aureus	no	abdominal	community acquired	gp3	survived	unknown	NA	NA	no	no	no	no	no	yes	no	no	no	no	no	yes	no	no	yes	no	no	no	no	no	no	4	9	no	no	no	alert	36,1-38,9øC	0	Ceftriaxon	IV (parenteral)
H4-18-0383-1	Hospital 4	1954	64	2018-10-01	2018-10-02	2018-11-05	female	BLOOMY	Training cohort	Staphylococcus aureus	no	skin and soft tissue	community acquired	gp1	survived	unknown	NA	NA	no	yes	no	no	no	yes	no	no	no	no	no	no	no	no	no	no	no	no	no	no	no	2	4	no	no	no	disoriented	35,1-36,0øC or 39,0-39,9øC	2	Piperacillin+Tazobactam	IV (parenteral)
H4-18-0389-1	Hospital 4	1935	83	2018-10-03	2018-10-07	2018-10-19	female	BLOOMY	Training cohort	Staphylococcus aureus	no	cardiovascular; intravasale foreign body	hospital acquired	gp1	diseased	31.2386	77	157	no	yes	no	no	no	no	no	no	no	no	no	no	no	no	no	no	no	no	no	no	no	4	5	no	no	no	alert	36,1-38,9øC	0	Daptomycin	IV (parenteral)
H4-18-0396-1	Hospital 4	1942	76	2018-10-12	2018-10-12	2018-11-19	male	BLOOMY	Training cohort	Staphylococcus aureus	no	cardiovascular; intravasale foreign body	community acquired	gp1	survived	24.5351	76	176	no	yes	yes	no	no	no	no	no	no	no	no	yes	yes	no	no	no	no	no	no	no	no	3	9	no	no	no	alert	36,1-38,9øC	0	Ceftriaxon	IV (parenteral)
H4-18-0397-1	Hospital 4	1962	56	2018-10-13	2018-10-13	2018-10-18	male	BLOOMY	Training cohort	Staphylococcus aureus	no	respiratory	community acquired	gp1	diseased	37.9839	130	185	no	no	yes	no	no	no	no	no	unknown	no	no	no	no	no	no	no	no	no	no	no	no	1	2	yes	yes	no	comatose	35,1-36,0øC or 39,0-39,9øC	9	Piperacillin+Tazobactam	IV (parenteral)
H4-18-0400-1	Hospital 4	1954	64	2018-10-08	2018-10-12	2018-11-06	male	BLOOMY	Training cohort	Staphylococcus aureus	no	cardiovascular	hospital acquired	gp1	survived	unknown	NA	NA	no	yes	no	no	no	yes	no	no	no	no	no	no	no	no	no	no	no	no	no	no	no	2	4	no	no	no	alert	36,1-38,9øC	0	Flucloxacillin	IV (parenteral)
H4-18-0402-1	Hospital 4	1946	72	2018-10-14	2018-10-14	2018-11-13	male	BLOOMY	Validation cohort	Staphylococcus aureus	no	respiratory	community acquired	gp4	survived	unknown	NA	NA	no	yes	yes	no	no	yes	no	no	unknown	no	no	no	no	no	yes	yes	no	no	no	no	yes	3	14	no	no	no	alert	36,1-38,9øC	0	Rifampicin	IV (parenteral)
H4-18-0404-1	Hospital 4	1935	83	2018-10-17	2018-10-17	2018-10-23	female	BLOOMY	Validation cohort	Staphylococcus aureus	no	bone and joint; foreign body	community acquired	gp1	diseased	40.0368	113	168	no	yes	no	no	yes	no	no	no	no	no	no	no	no	no	no	no	no	no	no	no	no	4	6	no	no	no	alert	36,1-38,9øC	0	Clindamycin	oral
H4-18-0410-1	Hospital 4	1981	37	2018-10-25	2018-10-25	2018-11-01	male	BLOOMY	Validation cohort	Staphylococcus aureus	no	bone and joint	community acquired	gp1	survived	29.0612	89	175	no	no	no	no	no	no	no	no	no	no	no	no	no	no	no	no	no	no	no	no	no	1	1	no	no	no	alert	36,1-38,9øC	0	Ampicillin+Sulbactam	oral
H4-18-0415-1	Hospital 4	1936	82	2018-10-26	2018-10-26	2018-10-30	female	BLOOMY	Training cohort	Staphylococcus aureus	no	bone and joint	community acquired	gp2	survived	unknown	NA	NA	no	no	no	no	no	no	yes	no	no	no	no	no	no	no	yes	no	no	no	no	no	no	4	7	no	no	no	alert	36,1-38,9øC	0	Flucloxacillin	IV (parenteral)
H4-18-0423-1	Hospital 4	1958	60	2018-11-01	2018-11-01	2018-11-23	female	BLOOMY	Validation cohort	Staphylococcus aureus	no	skin and soft tissue	community acquired	gp1	survived	23.0518	62	164	no	no	no	no	no	no	no	no	no	no	no	yes	no	no	no	no	no	no	no	no	no	2	4	no	no	no	alert	=< 35øC oder >= 40øC	2	Piperacillin+Tazobactam	IV (parenteral)
H4-18-0426-1	Hospital 4	1940	78	2018-10-22	2018-11-06	2018-12-05	female	BLOOMY	Training cohort	Staphylococcus aureus	no	skin and soft tissue	hospital acquired	gp2	survived	unknown	NA	NA	no	no	yes	no	no	yes	no	no	no	no	no	yes	no	no	no	no	no	no	no	no	no	3	7	no	no	no	disoriented	36,1-38,9øC	1	Flucloxacillin	IV (parenteral)
H4-18-0428-1	Hospital 4	1943	75	2018-11-03	2018-11-06	2018-11-22	male	BLOOMY	Validation cohort	Staphylococcus aureus	no	skin and soft tissue	hospital acquired	gp1	survived	34.8944	95	165	no	yes	no	no	no	no	no	no	no	no	yes	unknown	yes	no	no	no	no	no	no	no	no	3	7	no	no	no	alert	35,1-36,0øC or 39,0-39,9øC	1	Ceftriaxon	IV (parenteral)
H4-18-0441-1	Hospital 4	1946	72	2018-11-08	2018-11-14	2018-12-02	female	BLOOMY	Training cohort	Staphylococcus aureus	yes	respiratory	hospital acquired	gp1	diseased	23.4221	57	156	no	yes	yes	no	no	no	no	no	no	no	no	no	yes	no	no	no	no	no	no	no	no	3	7	no	no	no	disoriented	35,1-36,0øC or 39,0-39,9øC	2	Meropenem	IV (parenteral)
H4-18-0450-1	Hospital 4	1928	90	2018-11-20	2018-11-20	2018-11-30	female	BLOOMY	Validation cohort	Staphylococcus aureus	no	skin and soft tissue	community acquired	gp2	survived	18.3655	50	165	no	no	no	no	no	no	no	no	no	no	no	no	no	no	no	no	no	no	no	no	no	5	5	no	no	no	alert	35,1-36,0øC or 39,0-39,9øC	1	Ceftriaxon	IV (parenteral)
H4-18-0455-1	Hospital 4	1947	71	2018-11-23	2018-11-23	2018-11-30	female	BLOOMY	Training cohort	Staphylococcus aureus	no	skin and soft tissue	community acquired	gp1	diseased	unknown	NA	NA	no	yes	no	yes	no	no	yes	no	no	no	no	no	no	no	yes	no	no	yes	no	no	no	3	10	no	no	no	disoriented	36,1-38,9øC	1	Piperacillin+Tazobactam	IV (parenteral)
H4-18-0458-1	Hospital 4	1939	79	2018-11-18	2018-11-25	2018-12-23	male	BLOOMY	Training cohort	Staphylococcus aureus	no	cardiovascular; intravasale foreign body	hospital acquired	gp1	survived	unknown	NA	172	no	yes	no	no	no	no	no	no	no	no	yes	no	yes	no	no	no	no	no	no	no	no	3	7	no	no	no	disoriented	=< 35øC oder >= 40øC	3	Vancomycin	IV (parenteral)
H4-18-0463-1	Hospital 4	1944	74	2018-11-01	2018-11-28	2019-01-30	male	BLOOMY	Training cohort	Staphylococcus aureus	no	no focus identified	hospital acquired	gp3	survived	24.6181	78	178	NA	yes	no	no	yes	no	no	no	no	no	no	no	no	no	unknown	no	no	unknown	no	no	no	3	5	yes	no	no	alert	35,1-36,0øC or 39,0-39,9øC	3	Clindamycin	oral
H4-18-0473-1	Hospital 4	1941	77	2018-12-05	2018-12-05	2018-12-14	female	BLOOMY	Training cohort	Staphylococcus aureus	no	respiratory	community acquired	gp1	survived	34.049	85	158	no	no	no	no	yes	yes	no	no	yes	no	yes	no	no	no	yes	no	no	no	no	no	no	3	9	no	no	no	alert	36,1-38,9øC	0	Ceftriaxon	IV (parenteral)
H4-18-0495-1	Hospital 4	1941	77	2018-12-17	2018-12-20	2019-01-11	male	BLOOMY	Training cohort	Staphylococcus aureus	no	respiratory	hospital acquired	gp1	survived	unknown	NA	NA	no	yes	no	no	yes	no	no	no	no	no	no	no	no	no	no	no	no	no	no	no	no	3	5	yes	no	no	disoriented	35,1-36,0øC or 39,0-39,9øC	4	Ceftriaxon	IV (parenteral)
H4-18-0498-1	Hospital 4	1941	77	2018-12-25	2018-12-25	2019-01-08	male	BLOOMY	Training cohort	Staphylococcus aureus	no	bone and joint	community acquired	gp1	survived	unknown	NA	NA	no	no	no	no	no	no	no	no	no	no	yes	no	no	no	yes	no	no	no	no	no	no	3	6	no	no	no	alert	36,1-38,9øC	0	Ceftriaxon	IV (parenteral)
H5-17-0030-1	Hospital 5	1964	53	2017-03-21	2017-03-21	2017-05-16	male	BLOOMY	Validation cohort	Staphylococcus aureus	no	bone and joint	community acquired	gp1	survived	30.0712	90	173	no	yes	no	no	no	no	yes	no	no	no	no	no	yes	no	no	no	NA	NA	no	no	no	1	5	yes	no	no	alert	35,1-36,0øC or 39,0-39,9øC	3	Piperacillin+Tazobactam	IV (parenteral)
H5-17-0035-1	Hospital 5	1943	74	2017-03-25	2017-03-25	2017-04-08	male	BLOOMY	Training cohort	Staphylococcus aureus	no	cardiovascular; intravasale foreign body	community acquired	gp3	diseased	27.7778	90	180	no	yes	no	no	no	no	no	no	no	no	no	no	yes	no	no	no	NA	NA	no	no	no	3	6	yes	yes	no	comatose	36,1-38,9øC	8	Piperacillin+Tazobactam	IV (parenteral)
H5-17-0037-1	Hospital 5	1949	68	2017-04-07	2017-04-07	2017-04-19	male	BLOOMY	Validation cohort	Staphylococcus aureus	no	no focus identified	community acquired	gp1	survived	25.6896	76	172	no	no	no	no	no	no	unknown	no	no	unknown	unknown	no	no	no	yes	yes	NA	NA	no	no	no	2	10	no	no	no	alert	36,1-38,9øC	0	Meropenem	IV (parenteral)
H5-17-0038-1	Hospital 5	1942	75	2017-04-08	2017-04-08	2017-06-06	female	BLOOMY	Training cohort	Staphylococcus aureus	no	cardiovascular; intravasale foreign body	community acquired	gp1	diseased	36.9822	90	156	no	no	no	no	no	no	no	no	no	no	no	no	no	no	yes	no	NA	NA	no	no	no	3	5	no	no	no	alert	36,1-38,9øC	0	Ciprofloxacin	IV (parenteral)
H5-17-0077-1	Hospital 5	1963	54	2017-04-18	2017-04-18	2017-06-02	female	BLOOMY	Training cohort	Staphylococcus aureus	no	cerebral	community acquired	gp1	survived	29.7458	88	172	no	no	no	no	no	no	no	no	no	no	no	no	no	no	no	no	NA	NA	no	NA	NA	1	1	no	no	no	alert	36,1-38,9øC	0	Cefuroxim-Natrium	IV (parenteral)
H5-17-0087-1	Hospital 5	1937	80	2017-05-01	2017-05-01	2017-05-18	male	BLOOMY	Training cohort	Staphylococcus aureus	no	skin and soft tissue	community acquired	gp3	survived	30.0408	92	175	no	no	yes	no	no	no	no	no	yes	no	no	yes	yes	no	no	no	NA	NA	no	no	no	4	10	yes	no	no	alert	35,1-36,0øC or 39,0-39,9øC	3	Piperacillin+Tazobactam	IV (parenteral)
H5-17-0094-1	Hospital 5	1934	83	2017-05-11	2017-05-12	2017-05-26	female	BLOOMY	Validation cohort	Staphylococcus aureus	no	bone and joint	community acquired	gp1	survived	21.5045	51	154	no	yes	no	no	no	no	yes	no	no	no	no	no	no	no	no	no	NA	NA	no	no	no	4	6	no	no	no	alert	36,1-38,9øC	0	Cefuroxim-Natrium	IV (parenteral)
H5-17-0095-1	Hospital 5	1971	46	2017-05-25	2017-05-25	2017-05-31	male	BLOOMY	Training cohort	Staphylococcus aureus	no	respiratory	community acquired	gp1	survived	26.2966	90	185	no	no	no	no	no	no	no	no	no	no	yes	no	no	no	no	no	NA	NA	no	no	no	1	2	yes	yes	no	comatose	35,1-36,0øC or 39,0-39,9øC	9	Flucloxacillin	IV (parenteral)
H5-17-0096-1	Hospital 5	1980	37	2017-05-14	2017-05-14	2017-05-22	male	BLOOMY	Training cohort	Staphylococcus aureus	no	cardiovascular; intravasale foreign body	community acquired	gp1	survived	18.5911	55	172	no	no	no	no	no	yes	no	no	no	no	yes	no	no	no	no	no	NA	NA	no	no	no	1	3	no	no	no	alert	35,1-36,0øC or 39,0-39,9øC	1	Piperacillin+Tazobactam	IV (parenteral)
H5-17-0104-1	Hospital 5	1962	55	2017-06-01	2017-06-01	2017-06-07	female	BLOOMY	Training cohort	Staphylococcus aureus	no	cardiovascular; intravasale foreign body	community acquired	gp2	survived	26.8352	62	152	no	no	no	no	no	no	no	yes	no	no	no	no	no	no	yes	yes	NA	NA	no	no	no	1	10	no	no	no	alert	36,1-38,9øC	0	Vancomycin	IV (parenteral)
H5-17-0105-1	Hospital 5	1962	55	2017-06-01	2017-06-01	2017-06-16	female	BLOOMY	Training cohort	Staphylococcus aureus	no	cardiovascular	community acquired	gp1	survived	unknown	73	NA	no	no	no	no	no	no	no	no	no	no	no	no	no	no	no	no	NA	NA	no	no	no	1	1	no	no	no	disoriented	36,1-38,9øC	1	Ceftriaxon	oral
H5-17-0116-1	Hospital 5	1939	78	2017-06-12	2017-06-12	2017-06-13	female	BLOOMY	Training cohort	Staphylococcus aureus	no	cardiovascular; intravasale foreign body	community acquired	gp1	diseased	26.4463	72	165	no	no	no	no	no	no	no	no	no	yes	yes	no	no	no	yes	yes	NA	NA	no	no	no	3	15	yes	unknown	no	disoriented	36,1-38,9øC	3	Piperacillin+Tazobactam	IV (parenteral)
H5-17-0121-1	Hospital 5	1948	69	2017-06-13	2017-06-14	2017-07-14	male	BLOOMY	Training cohort	Staphylococcus aureus	no	no focus identified	community acquired	gp3	survived	30.1038	87	170	no	no	no	no	no	no	no	no	no	no	yes	no	no	no	no	no	NA	NA	no	no	no	2	3	yes	yes	no	comatose	36,1-38,9øC	8	Ciprofloxacin	IV (parenteral)
H5-17-0122-1	Hospital 5	1936	81	2017-06-15	2017-06-15	2017-06-16	female	BLOOMY	Training cohort	Staphylococcus aureus	no	urogenital	community acquired	gp2	diseased	25.7117	70	165	no	no	no	no	yes	no	no	no	no	no	no	yes	yes	no	no	no	NA	NA	no	no	no	4	9	yes	yes	no	comatose	36,1-38,9øC	8	Piperacillin+Tazobactam	IV (parenteral)
H5-17-0125-1	Hospital 5	1982	35	2017-06-15	2017-06-15	2017-06-29	male	BLOOMY	Training cohort	Staphylococcus aureus	no	bone and joint	community acquired	gp1	survived	26.2966	90	185	no	no	no	no	no	no	no	no	yes	no	no	no	no	no	no	no	NA	NA	no	no	no	1	2	no	no	no	alert	36,1-38,9øC	0	Piperacillin+Tazobactam	IV (parenteral)
H5-17-0146-1	Hospital 5	1942	75	2017-07-06	2017-07-10	2017-08-25	male	BLOOMY	Training cohort	Staphylococcus aureus	no	no focus identified	hospital acquired	gp1	survived	28.4082	87	175	no	no	yes	no	no	no	yes	no	no	no	no	yes	yes	no	no	no	NA	NA	no	no	no	3	9	no	no	no	alert	36,1-38,9øC	0	Piperacillin+Tazobactam	IV (parenteral)
H5-17-0170-1	Hospital 5	1957	60	2017-08-01	2017-08-06	2017-08-18	female	BLOOMY	Training cohort	Staphylococcus aureus	no	no focus identified	hospital acquired	gp1	survived	19.1327	54	168	no	no	no	no	no	no	no	no	no	no	no	yes	no	no	yes	no	NA	NA	no	no	yes	2	6	no	no	no	alert	36,1-38,9øC	0	Piperacillin+Tazobactam	IV (parenteral)
H5-17-0180-1	Hospital 5	1939	78	2017-08-20	2017-08-20	2017-09-15	female	BLOOMY	Training cohort	Staphylococcus aureus	no	cardiovascular	community acquired	gp1	survived	23.0469	59	160	no	no	no	no	no	no	yes	no	no	no	no	no	yes	no	no	no	NA	NA	no	no	no	3	6	no	no	no	alert	=< 35øC oder >= 40øC	2	Piperacillin+Tazobactam	IV (parenteral)
H5-17-0193-1	Hospital 5	1952	65	2017-09-04	2017-09-04	2017-09-12	male	BLOOMY	Training cohort	Staphylococcus aureus	no	cardiovascular; intravasale foreign body	community acquired	gp1	survived	25.2801	81	179	no	no	no	no	no	no	no	no	no	no	no	no	no	no	yes	yes	no	no	no	no	no	2	10	no	no	no	disoriented	35,1-36,0øC or 39,0-39,9øC	2	Piperacillin+Tazobactam	IV (parenteral)
H5-17-0214-1	Hospital 5	1958	59	2017-09-13	2017-09-27	2017-10-13	female	BLOOMY	Training cohort	Staphylococcus aureus	no	skin and soft tissue	hospital acquired	gp1	diseased	22.5827	60	163	no	no	no	no	yes	no	no	no	no	no	no	no	no	no	yes	yes	NA	NA	no	no	no	1	10	no	no	no	alert	36,1-38,9øC	0	Piperacillin+Tazobactam	IV (parenteral)
H5-17-0221-1	Hospital 5	1964	53	2017-10-02	2017-10-02	2017-10-13	female	BLOOMY	Training cohort	Staphylococcus aureus	no	bone and joint	community acquired	gp1	survived	22.5896	63	167	no	no	no	no	no	no	no	no	no	no	yes	no	no	no	no	no	NA	NA	no	no	no	1	2	no	no	no	alert	36,1-38,9øC	0	Amoxicillin+ Clavulans„ure	oral
H5-17-0226-1	Hospital 5	1945	72	2017-10-06	2017-10-06	2017-11-15	female	BLOOMY	Training cohort	Staphylococcus aureus	no	skin and soft tissue	community acquired	gp3	survived	27.1416	73	164	no	no	no	no	no	no	no	no	no	no	yes	no	yes	no	yes	no	NA	NA	no	no	no	3	8	yes	no	no	stuporous	36,1-38,9øC	4	other antibiotic substance	IV (parenteral)
H5-17-0233-1	Hospital 5	1972	45	2017-10-10	2017-10-10	2017-10-26	male	BLOOMY	Training cohort	Staphylococcus aureus	no	respiratory	community acquired	gp1	diseased	31.0137	105	184	no	no	no	no	no	no	no	no	no	no	no	no	no	no	yes	no	NA	NA	no	no	no	1	3	yes	yes	no	comatose	35,1-36,0øC or 39,0-39,9øC	9	Flucloxacillin	IV (parenteral)
H5-17-0235-1	Hospital 5	1980	37	2017-10-15	2017-10-15	2017-12-01	male	BLOOMY	Training cohort	Staphylococcus aureus	no	cardiovascular	community acquired	gp1	survived	24.0741	78	180	no	no	no	no	no	no	no	no	no	no	no	yes	no	no	no	no	NA	NA	no	no	no	1	3	no	no	no	alert	36,1-38,9øC	0	Ampicillin+Sulbactam	IV (parenteral)
H5-17-0253-1	Hospital 5	1967	50	2017-10-26	2017-11-03	2017-11-07	male	BLOOMY	Training cohort	Staphylococcus aureus	no	respiratory	hospital acquired	gp3	survived	24.1633	74	175	no	no	no	no	no	no	no	no	no	yes	no	no	yes	no	yes	yes	NA	NA	no	no	no	1	14	no	no	no	alert	36,1-38,9øC	0	Piperacillin+Tazobactam	IV (parenteral)
H5-17-0254-1	Hospital 5	1948	69	2017-10-26	2017-11-02	2017-12-18	male	BLOOMY	Validation cohort	Staphylococcus aureus	no	cardiovascular	hospital acquired	gp1	survived	35.9803	114	178	no	yes	no	no	no	no	no	no	no	no	yes	no	no	no	no	no	NA	NA	no	no	no	2	4	no	no	no	alert	35,1-36,0øC or 39,0-39,9øC	1	Piperacillin+Tazobactam	IV (parenteral)
H5-17-0255-1	Hospital 5	1966	51	2017-11-04	2017-11-05	2017-11-10	male	BLOOMY	Training cohort	Staphylococcus aureus	no	urogenital	community acquired	gp1	survived	25.4365	88	186	no	no	no	no	no	no	no	no	no	no	no	no	no	no	yes	no	NA	NA	no	no	no	1	3	no	no	no	alert	35,1-36,0øC or 39,0-39,9øC	1	Piperacillin+Tazobactam	IV (parenteral)
H5-17-0271-1	Hospital 5	1969	48	2017-11-10	2017-11-10	2017-11-20	female	BLOOMY	Training cohort	Staphylococcus aureus	no	bone and joint	community acquired	gp1	survived	25.7276	77	173	no	no	no	no	no	yes	no	no	no	no	no	no	no	no	no	no	NA	NA	no	no	no	1	2	no	no	no	alert	36,1-38,9øC	0	Flucloxacillin	IV (parenteral)
H5-17-0276-1	Hospital 5	1971	46	2017-11-21	2017-11-21	2018-01-09	male	BLOOMY	Training cohort	Staphylococcus aureus	no	cardiovascular	community acquired	gp2	diseased	24.8016	70	168	no	yes	no	no	no	no	no	no	no	no	no	no	no	yes	no	no	NA	NA	no	no	no	1	4	no	no	no	alert	35,1-36,0øC or 39,0-39,9øC	1	Gentamicin	IV (parenteral)
H5-17-0277-1	Hospital 5	1952	65	2017-11-19	2017-11-20	2017-11-24	male	BLOOMY	Training cohort	Staphylococcus aureus	no	urogenital	community acquired	gp3	survived	21.9713	65	172	no	no	no	no	no	no	no	no	no	no	no	no	no	no	no	no	NA	NA	no	no	no	2	2	no	no	no	alert	35,1-36,0øC or 39,0-39,9øC	1	Ciprofloxacin	IV (parenteral)
H5-17-0282-1	Hospital 5	1939	78	2017-11-22	2017-11-22	2017-11-29	female	BLOOMY	Training cohort	Staphylococcus aureus	no	no focus identified	community acquired	gp2	diseased	40.5625	120	172	yes	yes	no	no	no	no	no	no	no	no	yes	no	no	no	no	no	NA	NA	no	no	no	3	6	no	no	no	disoriented	35,1-36,0øC or 39,0-39,9øC	2	Piperacillin+Tazobactam	IV (parenteral)
H5-17-0289-1	Hospital 5	1947	70	2017-11-27	2017-11-27	2017-12-09	female	BLOOMY	Training cohort	Staphylococcus aureus	no	skin and soft tissue	community acquired	gp1	survived	31.5334	89	168	no	no	yes	no	no	yes	no	no	no	no	no	yes	yes	no	yes	yes	NA	NA	no	no	no	3	17	yes	no	no	alert	35,1-36,0øC or 39,0-39,9øC	3	other antibiotic substance	IV (parenteral)
H5-17-0290-1	Hospital 5	1930	87	2017-11-05	2017-11-27	2017-12-06	female	BLOOMY	Training cohort	Staphylococcus aureus	no	respiratory	hospital acquired	gp2	survived	29.2969	75	160	no	yes	no	no	no	no	no	no	no	yes	yes	no	yes	no	no	no	no	no	no	no	no	4	11	no	no	no	stuporous	36,1-38,9øC	2	Piperacillin+Tazobactam	IV (parenteral)
H5-17-0296-1	Hospital 5	1932	85	2017-12-01	2017-12-01	2017-12-02	female	BLOOMY	Training cohort	Staphylococcus aureus	no	skin and soft tissue	community acquired	gp3	diseased	25.9516	75	170	no	yes	yes	no	no	no	no	no	no	no	no	yes	yes	no	no	no	no	no	no	no	no	4	10	yes	yes	no	comatose	36,1-38,9øC	8	Meropenem	IV (parenteral)
H5-18-0020-1	Hospital 5	1982	36	2018-01-26	2018-01-25	2018-02-18	male	BLOOMY	Training cohort	Staphylococcus aureus	no	cardiovascular; intravasale foreign body	NA	gp1	survived	24.3072	85	187	no	no	no	no	no	no	no	no	no	no	no	no	no	yes	yes	no	yes	no	no	no	no	1	7	no	no	no	alert	36,1-38,9øC	0	Cotrimoxazol	oral
H5-18-0044-1	Hospital 5	1937	81	2018-02-13	2018-02-24	2018-04-19	male	BLOOMY	Training cohort	Staphylococcus aureus	no	cardiovascular; intravasale foreign body	hospital acquired	gp1	survived	31.1419	90	170	no	yes	no	no	no	yes	no	yes	no	no	yes	no	no	no	yes	no	no	no	no	no	no	4	10	yes	yes	no	unknown	36,1-38,9øC	4	Meropenem	IV (parenteral)
H5-18-0051-1	Hospital 5	1962	56	2018-01-12	2018-03-06	2018-03-16	female	BLOOMY	Training cohort	Staphylococcus aureus	no	skin and soft tissue	hospital acquired	gp1	survived	23.4375	60	160	no	no	no	no	yes	no	no	no	no	no	no	no	no	yes	unknown	no	no	no	no	no	no	1	4	yes	no	no	unknown	36,1-38,9øC	2	Cotrimoxazol	oral
H5-18-0070-1	Hospital 5	1950	68	2018-03-28	2018-03-28	2018-04-13	male	BLOOMY	Training cohort	Staphylococcus aureus	no	cardiovascular; intravasale foreign body	community acquired	gp1	survived	33.4124	100	173	no	yes	no	no	no	no	no	no	no	no	no	no	no	no	no	no	no	no	no	no	no	2	3	no	no	no	alert	35,1-36,0øC or 39,0-39,9øC	1	Ampicillin	IV (parenteral)
H5-18-0082-1	Hospital 5	1939	79	2018-04-01	2018-04-05	2018-04-12	male	BLOOMY	Training cohort	Staphylococcus aureus	no	cardiovascular; intravasale foreign body	hospital acquired	gp2	diseased	27.4145	83	174	no	yes	no	no	no	no	no	no	no	no	no	no	yes	no	no	no	no	no	no	no	no	3	6	yes	no	no	alert	36,1-38,9øC	2	Cefaclor	oral
H5-18-0097-1	Hospital 5	1973	45	2018-04-14	2018-04-18	2018-04-18	female	BLOOMY	Training cohort	Staphylococcus aureus	no	cardiovascular	hospital acquired	gp1	diseased	26.8136	73	165	no	yes	no	no	yes	no	no	yes	no	yes	no	no	yes	no	no	no	no	no	no	no	no	1	9	yes	yes	yes	comatose	35,1-36,0øC or 39,0-39,9øC	13	Ampicillin	IV (parenteral)
H5-18-0104-1	Hospital 5	1931	87	2018-04-15	2018-04-23	2018-05-09	male	BLOOMY	Training cohort	Staphylococcus aureus	no	cardiovascular; intravasale foreign body	hospital acquired	gp2	survived	25.0135	74	172	no	yes	no	no	yes	no	no	no	no	no	yes	no	no	no	no	no	no	no	no	no	no	4	7	no	no	no	alert	36,1-38,9øC	0	Cotrimoxazol	oral
H5-18-0111-1	Hospital 5	1943	75	2018-05-05	2018-05-05	2018-06-04	male	BLOOMY	Validation cohort	Staphylococcus aureus	no	cardiovascular	community acquired	gp3	survived	24.4898	75	175	no	yes	no	no	no	no	no	no	no	no	yes	no	no	no	no	no	no	no	no	no	no	3	5	no	no	no	alert	36,1-38,9øC	0	Ampicillin+Sulbactam	IV (parenteral)
H5-18-0135-1	Hospital 5	1954	64	2018-05-18	2018-05-22	2018-05-26	male	BLOOMY	Validation cohort	Staphylococcus aureus	no	no focus identified	hospital acquired	gp1	survived	21.6049	70	180	no	no	no	no	no	no	no	no	no	no	no	no	yes	no	no	no	no	no	no	no	no	2	4	no	no	no	alert	36,1-38,9øC	0	Ciprofloxacin	IV (parenteral)
H5-18-0145-1	Hospital 5	1948	70	2018-05-28	2018-06-02	2018-06-06	female	BLOOMY	Training cohort	Staphylococcus aureus	yes	bone and joint	hospital acquired	gp1	diseased	31.2213	85	165	no	no	no	no	no	no	no	no	yes	no	yes	no	no	yes	yes	yes	no	no	no	no	no	3	15	no	no	no	disoriented	36,1-38,9øC	1	Linezolid	IV (parenteral)
H5-18-0148-1	Hospital 5	1945	73	2018-06-03	2018-06-03	2018-06-19	male	BLOOMY	Training cohort	Staphylococcus aureus	no	cardiovascular	community acquired	gp2	survived	29.4832	102	186	no	yes	no	no	no	yes	no	no	no	no	no	no	no	no	yes	no	no	yes	no	no	no	3	9	no	no	no	alert	35,1-36,0øC or 39,0-39,9øC	1	Clarithromycin	oral
H5-18-0160-1	Hospital 5	1952	66	2018-06-03	2018-06-07	2018-06-15	male	BLOOMY	Validation cohort	Staphylococcus aureus	no	cardiovascular; intravasale foreign body	hospital acquired	gp1	survived	16.7883	55	181	yes	no	no	no	no	no	no	no	no	no	no	no	no	no	yes	yes	no	no	no	no	no	2	11	no	no	no	alert	36,1-38,9øC	0	Piperacillin+Tazobactam	IV (parenteral)
H5-18-0167-1	Hospital 5	1944	74	2018-06-14	2018-06-14	2018-06-25	male	BLOOMY	Training cohort	Staphylococcus aureus	no	no focus identified	community acquired	gp1	survived	25.8806	82	178	no	yes	no	no	yes	no	no	yes	no	no	yes	no	yes	no	no	no	no	no	no	no	no	3	9	no	no	no	alert	36,1-38,9øC	0	Piperacillin+Tazobactam	IV (parenteral)
H5-18-0192-1	Hospital 5	1968	50	2018-06-19	2018-07-03	2018-09-11	male	BLOOMY	Training cohort	Staphylococcus aureus	no	respiratory	hospital acquired	gp1	survived	31.21	100	179	no	no	no	no	no	no	no	no	no	yes	no	no	yes	no	no	no	no	no	no	no	no	1	6	yes	yes	no	comatose	36,1-38,9øC	8	Piperacillin+Tazobactam	IV (parenteral)
H5-18-0198-1	Hospital 5	1969	49	2018-07-10	2018-07-11	2018-07-19	female	BLOOMY	Training cohort	Staphylococcus aureus	no	skin and soft tissue	community acquired	gp1	survived	62.3583	176	168	no	no	no	no	no	no	no	no	no	no	no	no	no	no	no	no	no	no	no	no	no	1	1	no	no	no	alert	36,1-38,9øC	0	Ceftriaxon	IV (parenteral)
H5-18-0202-1	Hospital 5	1939	79	2018-07-02	2018-07-08	2018-07-26	male	BLOOMY	Training cohort	Staphylococcus aureus	no	cardiovascular; intravasale foreign body	hospital acquired	gp3	survived	18.6736	66	188	yes	no	no	no	no	yes	no	no	no	no	no	no	yes	no	yes	no	no	yes	no	no	no	3	11	yes	no	no	alert	35,1-36,0øC or 39,0-39,9øC	3	Piperacillin	IV (parenteral)
H5-18-0223-1	Hospital 5	1942	76	2018-07-30	2018-07-30	2018-08-09	male	BLOOMY	Training cohort	Staphylococcus aureus	no	cardiovascular; intravasale foreign body	community acquired	gp2	survived	27.4406	85	176	unknown	no	unknown	no	yes	no	no	no	no	no	no	no	yes	no	no	no	no	no	no	no	yes	3	6	no	no	no	alert	35,1-36,0øC or 39,0-39,9øC	1	Piperacillin+Tazobactam	IV (parenteral)
H5-18-0229-1	Hospital 5	1950	68	2018-08-02	2018-08-01	2018-08-18	male	BLOOMY	Validation cohort	Staphylococcus aureus	no	bone and joint	community acquired	gp2	survived	23.4568	76	180	yes	no	no	no	no	yes	no	no	no	no	no	no	yes	no	no	no	no	no	no	no	no	2	6	no	no	no	alert	36,1-38,9øC	0	Piperacillin+Tazobactam	IV (parenteral)
H5-18-0240-1	Hospital 5	1963	55	2018-08-03	2018-08-03	2018-08-22	male	BLOOMY	Training cohort	Staphylococcus aureus	no	cardiovascular	community acquired	gp3	survived	24.3025	77	178	no	no	no	no	no	no	no	no	no	no	no	no	no	no	no	no	no	no	no	no	no	1	1	no	no	no	unknown	36,1-38,9øC	0	Flucloxacillin	IV (parenteral)
H5-18-0245-1	Hospital 5	1936	82	2018-08-09	2018-08-09	2018-09-06	male	BLOOMY	Training cohort	Staphylococcus aureus	no	respiratory	community acquired	gp1	survived	22.5981	70	176	yes	no	no	no	no	no	no	no	no	no	no	yes	no	no	yes	no	yes	no	no	no	no	4	11	yes	no	no	stuporous	=< 35øC oder >= 40øC	6	Piperacillin+Tazobactam	IV (parenteral)
H5-18-0266-1	Hospital 5	1961	57	2018-08-27	2018-08-28	2018-10-29	male	BLOOMY	Training cohort	Staphylococcus aureus	no	cardiovascular	community acquired	gp2	survived	27	108	200	no	no	no	no	no	no	no	no	no	no	no	no	no	no	no	no	no	no	no	no	no	1	1	no	no	no	disoriented	36,1-38,9øC	1	Piperacillin+Tazobactam	IV (parenteral)
H5-18-0272-1	Hospital 5	1971	47	2018-08-30	2018-09-03	2018-09-11	male	BLOOMY	Training cohort	Staphylococcus aureus	no	cardiovascular; intravasale foreign body	hospital acquired	gp2	survived	24.9135	72	170	no	yes	no	no	no	no	no	no	no	no	no	no	no	no	no	no	no	no	no	no	no	1	2	no	no	no	alert	36,1-38,9øC	0	Sultamicillin	oral
H5-18-0276-1	Hospital 5	1965	53	2018-09-05	2018-09-06	2018-09-13	male	BLOOMY	Training cohort	Staphylococcus aureus	no	no focus identified	community acquired	gp1	survived	28.06	95	184	no	yes	no	no	no	no	no	no	no	no	no	no	no	no	no	no	no	no	no	no	no	1	2	no	no	no	alert	=< 35øC oder >= 40øC	2	Ampicillin+Sulbactam	IV (parenteral)
H5-18-0291-1	Hospital 5	1966	52	2018-09-20	2018-09-20	2018-10-18	female	BLOOMY	Training cohort	Staphylococcus aureus	no	skin and soft tissue	community acquired	gp3	survived	28.125	72	160	no	yes	no	no	no	no	no	no	no	no	yes	no	no	no	no	no	no	no	no	no	no	1	3	no	no	no	alert	36,1-38,9øC	0	Flucloxacillin	IV (parenteral)
H5-18-0299-1	Hospital 5	1983	35	2018-09-28	2018-09-28	2018-10-23	male	BLOOMY	Training cohort	Staphylococcus aureus	no	cardiovascular	community acquired	gp2	survived	24.7293	95	196	no	no	no	no	no	no	no	no	no	no	no	no	no	no	no	no	no	no	no	no	no	1	1	yes	no	no	alert	36,1-38,9øC	2	Flucloxacillin	IV (parenteral)
H5-18-0301-1	Hospital 5	1947	71	2018-09-28	2018-09-29	2018-11-23	male	BLOOMY	Validation cohort	Staphylococcus aureus	no	cardiovascular; intravasale foreign body	community acquired	gp1	survived	21.5619	73	184	no	yes	no	no	yes	no	no	no	no	no	no	no	yes	no	no	no	no	no	no	no	no	3	7	no	no	no	alert	35,1-36,0øC or 39,0-39,9øC	1	Clindamycin	IV (parenteral)
H5-18-0309-1	Hospital 5	1959	59	2018-10-04	2018-10-04	2018-10-13	male	BLOOMY	Training cohort	Staphylococcus aureus	no	cardiovascular	community acquired	gp1	diseased	26.2346	85	180	yes	no	no	no	no	no	no	no	no	no	no	no	no	no	no	no	no	no	no	no	no	1	2	yes	yes	no	unknown	36,1-38,9øC	4	Clarithromycin	IV (parenteral)
H5-18-0318-1	Hospital 5	1929	89	2018-10-11	2018-10-11	2018-10-16	female	BLOOMY	Training cohort	Staphylococcus aureus	no	no focus identified	community acquired	gp2	survived	23.7332	60	159	yes	yes	no	no	no	no	no	no	no	no	no	no	yes	no	no	no	no	no	no	no	no	4	8	no	no	no	alert	36,1-38,9øC	0	Piperacillin+Tazobactam	IV (parenteral)
H5-18-0319-1	Hospital 5	1936	82	2018-10-11	2018-10-12	2018-10-22	male	BLOOMY	Training cohort	Staphylococcus aureus	no	bone and joint; foreign body	community acquired	gp3	diseased	28.7274	90	177	no	no	no	no	no	yes	no	no	no	no	no	no	yes	no	no	no	no	no	no	no	no	4	7	yes	no	no	alert	35,1-36,0øC or 39,0-39,9øC	3	Cefuroxim-Natrium	IV (parenteral)
H5-18-0320-1	Hospital 5	1949	69	2018-10-12	2018-10-12	2018-10-16	male	BLOOMY	Training cohort	Staphylococcus aureus	no	urogenital	community acquired	gp1	survived	27.7551	85	175	no	no	no	no	no	no	no	no	no	no	yes	no	no	no	no	no	no	no	no	no	no	2	3	no	no	no	alert	36,1-38,9øC	0	Clindamycin	IV (parenteral)
H5-18-0322-1	Hospital 5	1950	68	2018-10-13	2018-10-13	2018-10-30	male	BLOOMY	Training cohort	Staphylococcus aureus	no	skin and soft tissue	community acquired	gp3	survived	21.9774	72	181	no	no	no	no	no	no	no	no	no	no	no	no	yes	no	yes	yes	no	no	no	no	no	2	12	no	no	no	unknown	36,1-38,9øC	0	Ampicillin+Sulbactam	IV (parenteral)
H5-18-0330-1	Hospital 5	1960	58	2018-10-19	2018-10-19	2018-10-25	male	BLOOMY	Training cohort	Staphylococcus aureus	no	cardiovascular; intravasale foreign body	community acquired	gp1	diseased	24.4898	75	175	yes	yes	yes	no	no	no	no	no	no	yes	no	no	yes	no	yes	no	no	no	no	no	no	1	11	yes	yes	yes	comatose	35,1-36,0øC or 39,0-39,9øC	13	Piperacillin+Tazobactam	IV (parenteral)
H5-18-0333-1	Hospital 5	1942	76	2018-10-23	2018-10-24	2018-11-03	female	BLOOMY	Training cohort	Staphylococcus aureus	no	abdominal	community acquired	gp2	diseased	21.5645	58	164	no	no	no	no	yes	no	yes	no	no	no	no	yes	yes	no	no	no	no	no	no	no	no	3	9	yes	no	no	alert	=< 35øC oder >= 40øC	4	Vancomycin	oral
H5-18-0374-1	Hospital 5	1933	85	2018-11-28	2018-11-28	2018-11-28	female	BLOOMY	Validation cohort	Staphylococcus aureus	no	no focus identified	community acquired	gp3	diseased	25	64	160	no	yes	no	no	no	no	yes	no	no	no	no	yes	no	yes	no	no	no	no	no	no	no	4	10	yes	yes	yes	stuporous	36,1-38,9øC	10	Meropenem	NA
H5-18-0375-1	Hospital 5	1930	88	2018-11-28	2018-11-28	2018-12-04	female	BLOOMY	Training cohort	Staphylococcus aureus	no	bone and joint	community acquired	gp2	diseased	unknown	60	NA	yes	no	no	yes	no	no	no	no	no	no	no	no	no	no	no	no	no	no	no	no	no	4	6	yes	no	no	stuporous	36,1-38,9øC	4	Piperacillin+Tazobactam	IV (parenteral)
H5-18-0378-1	Hospital 5	1953	65	2018-11-27	2018-12-01	2018-12-21	male	BLOOMY	Validation cohort	Staphylococcus aureus	no	cardiovascular; intravasale foreign body	hospital acquired	gp1	survived	36.9272	117	178	no	no	no	no	no	no	no	no	no	no	no	no	no	no	yes	no	no	no	no	no	no	2	4	no	no	no	alert	35,1-36,0øC or 39,0-39,9øC	1	Piperacillin+Tazobactam	IV (parenteral)
H5-18-0394-1	Hospital 5	1970	48	2018-12-24	2018-12-24	2019-01-21	male	BLOOMY	Training cohort	Staphylococcus aureus	yes	cardiovascular	community acquired	gp1	survived	22.6347	80	188	no	no	no	no	no	no	no	no	yes	no	no	no	no	no	no	no	no	no	no	no	no	1	2	yes	no	no	alert	35,1-36,0øC or 39,0-39,9øC	3	Clarithromycin	IV (parenteral)
H5-18-0397-1	Hospital 5	1950	68	2018-12-29	2018-12-31	2019-02-20	female	BLOOMY	Training cohort	Staphylococcus aureus	no	no focus identified	hospital acquired	gp3	survived	29.0006	78	164	no	no	no	no	no	no	yes	no	no	no	no	no	no	no	no	no	no	no	no	no	no	2	3	no	no	no	alert	36,1-38,9øC	0	Flucloxacillin	IV (parenteral)
H5-19-0318-1	Hospital 5	1944	75	2019-10-02	2019-10-20	2019-12-05	female	PREDICT	Validation cohort	Staphylococcus aureus	no	cardiovascular	hospital acquired	gp1	survived	23.0104	66.5	170	no	yes	no	no	no	no	no	no	no	no	yes	no	no	no	yes	yes	no	no	no	no	no	3	13	no	no	no	disoriented	36,1-38,9°C	1	Piperacillin/Tazobactam	IV (parenteral)
H5-19-0320-1	Hospital 5	1977	42	2019-10-07	2019-10-20	2019-11-19	male	PREDICT	Training cohort	Staphylococcus aureus	no	no focus identified	hospital acquired	gp1	survived	33.464	99	172	no	no	no	no	no	no	no	no	no	no	no	no	no	no	yes	no	no	no	no	no	no	1	3	no	no	no	alert	35,1-36,0°C or 39,0-39,9°C	1	Clindamycin	IV (parenteral)
H5-19-0334-1	Hospital 5	1962	57	2019-10-30	2019-10-30	2019-11-07	male	PREDICT	Training cohort	Staphylococcus aureus	no	cardiovascular; intravasale foreign body	community acquired	gp1	survived	25.8844	84.8000030517578	181	yes	yes	yes	no	no	no	no	yes	no	no	no	no	yes	no	no	no	no	no	no	no	no	1	7	yes	no	no	unknown	=< 35°C oder >= 40°C	4	Vancomycin	IV (parenteral)
H5-19-0336-1	Hospital 5	1969	50	2019-10-27	2019-11-02	2019-11-15	male	PREDICT	Training cohort	Staphylococcus aureus	no	no focus identified	hospital acquired	gp2	survived	27.4145	83	174	yes	no	yes	no	no	no	no	no	no	no	yes	no	no	no	yes	no	yes	no	no	no	no	1	8	yes	no	no	alert	=< 35°C oder >= 40°C	4	Piperacillin/Tazobactam	IV (parenteral)
H5-19-0341-1	Hospital 5	1949	70	2019-10-29	2019-11-05	2019-11-19	male	PREDICT	Training cohort	Staphylococcus aureus	no	cardiovascular; intravasale foreign body	hospital acquired	gp2	survived	29.5062	95.5999984741211	180	no	no	no	no	no	no	no	no	no	no	no	yes	no	no	no	no	no	no	no	no	no	3	5	no	no	no	alert	35,1-36,0°C or 39,0-39,9°C	1	Piperacillin/Tazobactam	IV (parenteral)
H5-19-0346-1	Hospital 5	1969	50	2019-11-04	2019-11-09	2019-11-19	male	PREDICT	Training cohort	Staphylococcus aureus	no	cardiovascular; intravasale foreign body	hospital acquired	gp1	survived	30.7085	105.099998474121	185	no	no	no	no	no	no	no	no	no	no	no	no	no	no	yes	no	no	no	no	no	no	1	3	no	no	no	alert	36,1-38,9°C	0	Meropenem	IV (parenteral)
H5-19-0349-1	Hospital 5	1980	39	2019-11-08	2019-11-14	2019-12-04	female	PREDICT	Training cohort	Staphylococcus aureus	no	cardiovascular; intravasale foreign body	hospital acquired	gp2	survived	34.6809	105	174	no	yes	no	no	no	no	no	no	no	yes	no	no	yes	no	no	no	no	no	no	no	no	1	7	no	no	no	alert	35,1-36,0°C or 39,0-39,9°C	1	Piperacillin/Tazobactam	IV (parenteral)
H5-19-0365-1	Hospital 5	1951	68	2019-11-28	2019-11-28	2019-12-01	male	PREDICT	Training cohort	Staphylococcus aureus	no	no focus identified	community acquired	gp3	diseased	22.4653	68.8000030517578	175	no	yes	no	no	no	no	no	no	no	no	yes	no	no	no	no	no	no	no	no	no	no	2	4	unknown	no	no	disoriented	35,1-36,0°C or 39,0-39,9°C	2	Flucloxacillin	IV (parenteral)
H5-19-0368-1	Hospital 5	1942	77	2019-11-26	2019-12-03	2019-12-19	male	PREDICT	Training cohort	Staphylococcus aureus	yes	cardiovascular; intravasale foreign body	hospital acquired	gp1	survived	27.3797	81	172	no	no	no	no	no	no	no	no	no	no	no	no	no	no	yes	yes	no	no	no	no	no	3	11	yes	no	no	alert	36,1-38,9°C	2	Metronidazol	IV (parenteral)
H5-19-0376-1	Hospital 5	1963	56	2019-11-28	2019-12-02	2019-12-10	male	PREDICT	Training cohort	Staphylococcus aureus	no	cardiovascular	hospital acquired	gp3	survived	23.7388	72.6999969482422	175	no	no	no	no	yes	no	no	no	no	no	no	no	no	yes	no	no	no	no	no	no	no	1	4	no	no	no	disoriented	36,1-38,9°C	1	Flucloxacillin	IV (parenteral)
H5-19-0377-1	Hospital 5	1999	20	2019-12-04	2019-12-04	2019-12-23	male	PREDICT	Validation cohort	Staphylococcus aureus	no	other	community acquired	gp2	survived	20.3383	63	176	no	no	no	no	no	no	no	no	no	no	no	no	no	no	no	no	no	no	no	no	no	1	1	yes	no	no	disoriented	36,1-38,9°C	3	Ampicillin	IV (parenteral)
H5-19-0382-1	Hospital 5	1937	82	2019-12-12	2019-12-12	2019-12-19	male	PREDICT	Validation cohort	Staphylococcus aureus	no	skin and soft tissue	community acquired	gp1	survived	27.7427	87.9000015258789	178	no	no	no	no	no	yes	no	no	no	no	no	yes	no	no	no	no	no	no	no	no	no	4	7	no	no	no	alert	35,1-36,0°C or 39,0-39,9°C	1	Ampicillin/Sulbactam	IV (parenteral)
H5-19-0403-1	Hospital 5	1957	62	2019-12-25	2019-12-28	2020-03-03	male	PREDICT	Validation cohort	Staphylococcus aureus	no	bone and joint	hospital acquired	gp1	diseased	20.202	55	165	no	no	no	no	no	no	no	no	yes	no	no	no	no	no	no	no	no	no	no	no	no	2	3	yes	yes	yes	comatose	=< 35°C oder >= 40°C	14	Cefepim	IV (parenteral)
H5-19-0406-1	Hospital 5	1963	56	2019-12-17	2019-12-30	2020-01-22	male	PREDICT	Training cohort	Staphylococcus aureus	no	respiratory	hospital acquired	gp1	survived	26.8745	90	183	no	no	no	no	no	no	no	no	no	no	no	no	no	yes	no	no	no	no	no	no	no	1	3	yes	yes	no	unknown	36,1-38,9°C	4	Cefotaxim	IV (parenteral)
H5-20-0004-1	Hospital 5	1968	52	2020-01-05	2020-01-05	2020-01-06	male	PREDICT	Training cohort	Staphylococcus aureus	no	no focus identified	community acquired	gp1	diseased	22.0932	70	178	no	no	no	no	no	no	no	no	no	yes	no	no	no	no	yes	no	no	no	no	no	no	1	6	yes	no	no	disoriented	=< 35°C oder >= 40°C	5	Piperacillin/Tazobactam	IV (parenteral)
H5-20-0011-1	Hospital 5	1941	79	2020-01-14	2020-01-17	2020-01-24	female	PREDICT	Training cohort	Staphylococcus aureus	no	no focus identified	hospital acquired	gp2	survived	24.7751	71.5999984741211	170	yes	yes	no	no	no	no	no	no	no	no	no	no	no	no	no	no	no	no	no	no	no	3	5	no	no	no	alert	36,1-38,9°C	0	Ampicillin	IV (parenteral)
H5-20-0038-1	Hospital 5	1964	56	2020-01-29	2020-01-30	2020-02-25	male	PREDICT	Training cohort	Staphylococcus aureus	no	cerebral	community acquired	gp1	survived	25.3934	76	173	no	no	no	no	no	no	no	no	no	no	no	no	no	no	no	no	no	no	no	no	no	1	1	yes	yes	no	alert	36,1-38,9°C	4	Cefuroxim-Natrium	IV (parenteral)
H5-20-0041-1	Hospital 5	1945	75	2020-02-04	2020-02-04	2020-02-15	male	PREDICT	Training cohort	Staphylococcus aureus	no	bone and joint	community acquired	gp1	survived	24.5351	76	176	no	yes	no	no	yes	no	no	no	no	no	yes	no	yes	no	no	no	no	no	no	no	no	3	8	yes	no	no	alert	35,1-36,0°C or 39,0-39,9°C	3	Ceftriaxon	IV (parenteral)
H5-20-0053-1	Hospital 5	1930	90	2020-02-15	2020-02-15	2020-02-16	male	PREDICT	Validation cohort	Staphylococcus aureus	no	no focus identified	community acquired	gp1	diseased	unknown	NA	NA	yes	yes	no	yes	no	no	no	no	no	no	no	no	yes	no	no	no	no	no	no	no	no	5	10	no	no	no	disoriented	36,1-38,9°C	1	Piperacillin/Tazobactam	IV (parenteral)
H5-20-0076-1	Hospital 5	1954	66	2020-03-02	2020-03-10	2020-03-25	female	PREDICT	Training cohort	Staphylococcus aureus	yes	respiratory	hospital acquired	gp3	survived	19.1001	52	165	no	no	no	no	no	no	yes	no	no	no	yes	no	no	no	yes	yes	no	no	no	no	no	2	12	yes	no	no	alert	35,1-36,0°C or 39,0-39,9°C	3	Piperacillin/Tazobactam	IV (parenteral)
H5-20-0138-1	Hospital 5	1957	63	2020-04-27	2020-04-27	2020-06-03	female	PREDICT	Validation cohort	Staphylococcus aureus	no	cardiovascular	community acquired	gp1	survived	33.2031	85	160	no	no	no	no	no	yes	no	no	no	no	yes	no	no	yes	no	no	no	no	no	no	no	2	6	yes	no	no	disoriented	36,1-38,9°C	3	Ceftriaxon	IV (parenteral)
H5-20-0163-1	Hospital 5	1957	63	2020-05-11	2020-05-20	2020-06-16	female	PREDICT	Validation cohort	Staphylococcus aureus	no	cardiovascular; intravasale foreign body	hospital acquired	gp3	survived	34.6021	100	170	no	no	no	no	no	no	no	no	no	no	no	no	no	no	no	no	no	no	no	no	no	2	2	yes	no	no	disoriented	36,1-38,9°C	3	no antibiotic therapy administered	NA
H5-20-0164-1	Hospital 5	1939	81	2020-05-20	2020-05-20	2020-06-08	female	PREDICT	Training cohort	Staphylococcus aureus	no	bone and joint	community acquired	gp1	survived	43.2882	104	155	no	no	no	no	no	no	no	no	no	no	yes	no	no	no	yes	no	no	no	no	no	no	4	7	no	yes	no	alert	36,1-38,9°C	2	Clindamycin	IV (parenteral)
H5-20-0175-1	Hospital 5	1943	77	2020-05-26	2020-05-31	2020-10-06	male	PREDICT	Training cohort	Staphylococcus aureus	no	cardiovascular	hospital acquired	gp2	survived	22.6757	64	168	no	no	no	no	no	no	no	no	no	no	no	no	no	no	yes	yes	no	no	no	no	no	3	11	yes	no	no	disoriented	36,1-38,9°C	3	Vancomycin	IV (parenteral)
H5-20-0200-1	Hospital 5	1936	84	2020-06-27	2020-06-27	2020-07-24	male	PREDICT	Training cohort	Staphylococcus aureus	no	respiratory	community acquired	gp3	diseased	24.5089	70	169	no	yes	no	no	yes	no	no	no	no	no	no	no	no	yes	yes	yes	no	no	no	no	no	4	16	no	no	no	disoriented	35,1-36,0°C or 39,0-39,9°C	2	Ampicillin/Sulbactam	IV (parenteral)
H5-20-0217-1	Hospital 5	1968	52	2020-07-06	2020-07-08	2020-07-24	male	PREDICT	Training cohort	Staphylococcus aureus	no	cardiovascular; intravasale foreign body	hospital acquired	gp2	survived	27.963	90.5999984741211	180	no	no	no	no	no	no	no	no	no	no	no	no	yes	no	yes	no	no	no	no	no	no	1	5	no	no	no	alert	35,1-36,0°C or 39,0-39,9°C	1	Cefazolin	IV (parenteral)
H5-20-0228-1	Hospital 5	1943	77	2020-07-06	2020-07-18	2020-08-13	male	PREDICT	Training cohort	Staphylococcus aureus	no	respiratory	hospital acquired	gp3	survived	27.7069	78.1999969482422	168	yes	yes	no	no	yes	no	no	no	yes	no	yes	no	no	no	yes	no	no	no	no	no	no	3	10	yes	no	no	alert	36,1-38,9°C	2	Piperacillin/Tazobactam	IV (parenteral)
H5-20-0229-1	Hospital 5	1960	60	2020-07-19	2020-07-19	2020-08-21	male	PREDICT	Training cohort	Staphylococcus aureus	no	cardiovascular	community acquired	gp3	survived	34.5143	105.699996948242	175	no	no	no	no	no	no	no	no	no	no	yes	no	no	no	no	no	no	no	no	no	no	2	3	no	no	no	alert	=< 35°C oder >= 40°C	2	Daptomycin	IV (parenteral)
H5-20-0253-1	Hospital 5	1956	64	2020-07-29	2020-08-07	2020-08-27	male	PREDICT	Training cohort	Staphylococcus aureus	no	other	hospital acquired	gp3	survived	23.0523	77.1999969482422	183	yes	yes	no	no	no	no	no	no	no	no	no	no	no	no	no	no	no	no	no	no	no	2	4	yes	no	no	disoriented	=< 35°C oder >= 40°C	5	Piperacillin/Tazobactam	IV (parenteral)
H5-20-0254-1	Hospital 5	1947	73	2020-08-06	2020-08-07	2020-09-10	male	PREDICT	Training cohort	Staphylococcus aureus	no	no focus identified	community acquired	gp1	survived	21.3068	66	176	yes	yes	yes	no	no	no	no	no	no	no	yes	no	yes	no	no	no	no	no	no	no	no	3	9	yes	no	no	alert	35,1-36,0°C or 39,0-39,9°C	3	Piperacillin/Tazobactam	IV (parenteral)
H5-20-0260-1	Hospital 5	1943	77	2020-08-11	2020-08-11	2020-08-16	male	PREDICT	Training cohort	Staphylococcus aureus	no	cardiovascular	community acquired	gp3	diseased	40.1235	130	180	no	yes	no	no	no	no	no	no	no	no	no	no	no	no	no	no	no	no	no	no	no	3	4	yes	yes	no	unknown	36,1-38,9°C	4	Cefazolin	IV (parenteral)
H5-20-0275-1	Hospital 5	1951	69	2020-08-25	2020-08-25	2020-09-15	male	PREDICT	Training cohort	Staphylococcus aureus	no	bone and joint	community acquired	gp1	survived	35.097	126.699996948242	190	no	yes	no	no	no	no	no	no	no	no	no	no	no	no	no	no	no	no	no	no	no	2	3	no	no	no	alert	36,1-38,9°C	0	Ampicillin/Sulbactam	IV (parenteral)
H5-20-0297-1	Hospital 5	1974	46	2020-09-09	2020-09-09	2020-09-14	female	PREDICT	Training cohort	Staphylococcus aureus	no	cardiovascular; intravasale foreign body	community acquired	gp1	survived	33.0579	90	165	no	no	no	no	no	no	no	no	no	no	no	no	no	no	no	no	no	no	no	no	no	1	1	no	no	no	alert	35,1-36,0°C or 39,0-39,9°C	1	Clindamycin	IV (parenteral)
H5-20-0299-1	Hospital 5	1954	66	2020-09-07	2020-09-10	2020-09-18	male	PREDICT	Training cohort	Staphylococcus aureus	yes	no focus identified	hospital acquired	gp2	survived	29.0123	94	180	no	yes	no	no	no	no	no	no	no	no	no	no	yes	no	yes	no	no	no	no	no	no	2	7	yes	no	no	alert	35,1-36,0°C or 39,0-39,9°C	3	Piperacillin/Tazobactam	IV (parenteral)
H5-20-0308-1	Hospital 5	1977	43	2020-09-20	2020-09-20	2020-11-03	female	PREDICT	Validation cohort	Staphylococcus aureus	no	cardiovascular; intravasale foreign body	community acquired	gp1	survived	36.0947	61	130	no	no	no	no	no	no	no	no	no	no	no	no	yes	no	no	no	no	no	no	no	no	1	3	no	no	no	alert	=< 35°C oder >= 40°C	2	Piperacillin/Tazobactam	IV (parenteral)
H5-20-0309-1	Hospital 5	1944	76	2020-09-19	2020-09-19	2020-09-25	male	PREDICT	Training cohort	Staphylococcus aureus	no	other	community acquired	gp3	survived	22.2041	68	175	no	no	no	no	no	no	no	no	no	no	no	no	no	no	yes	yes	no	no	no	no	no	3	11	no	no	no	alert	35,1-36,0°C or 39,0-39,9°C	1	Piperacillin/Tazobactam	IV (parenteral)
H5-20-0310-1	Hospital 5	1954	66	2020-09-17	2020-09-20	2020-09-22	male	PREDICT	Training cohort	Staphylococcus aureus	no	no focus identified	hospital acquired	gp2	diseased	25.7122	88	185	no	yes	no	no	no	yes	no	no	no	no	yes	no	yes	no	yes	no	no	no	no	no	no	2	9	yes	no	no	disoriented	35,1-36,0°C or 39,0-39,9°C	4	Meropenem	IV (parenteral)
H5-20-0331-1	Hospital 5	1951	69	2020-10-07	2020-10-07	2020-11-25	male	PREDICT	Training cohort	Staphylococcus aureus	no	no focus identified	community acquired	gp1	survived	26.465	89.5999984741211	184	no	yes	no	no	no	no	no	no	no	no	no	no	yes	no	yes	no	yes	no	no	no	no	2	9	no	no	no	alert	35,1-36,0°C or 39,0-39,9°C	1	Piperacillin/Tazobactam	IV (parenteral)
H5-20-0335-1	Hospital 5	1958	62	2020-10-04	2020-10-11	2020-11-05	male	PREDICT	Training cohort	Staphylococcus aureus	no	no focus identified	hospital acquired	gp2	survived	19.8871	66.5999984741211	183	no	no	no	no	no	no	no	no	no	no	yes	no	no	no	no	no	no	no	no	no	yes	2	3	no	no	no	alert	36,1-38,9°C	0	Piperacillin/Tazobactam	IV (parenteral)
H5-20-0358-1	Hospital 5	1957	63	2020-10-26	2020-10-27	2020-11-10	male	PREDICT	Training cohort	Staphylococcus aureus	no	skin and soft tissue	community acquired	gp3	survived	29.6838	94.0500030517578	178	no	no	no	no	no	no	no	no	no	no	no	no	no	no	yes	no	yes	yes	no	no	no	2	8	no	no	no	alert	35,1-36,0°C or 39,0-39,9°C	1	Piperacillin/Tazobactam	IV (parenteral)
H5-20-0390-1	Hospital 5	1956	64	2020-11-24	2020-11-24	2020-12-11	male	PREDICT	Validation cohort	Staphylococcus aureus	no	cardiovascular	community acquired	gp1	diseased	27.7551	85	175	no	no	no	no	no	no	no	no	no	no	no	no	no	no	no	no	no	no	no	no	no	2	2	yes	no	no	disoriented	35,1-36,0°C or 39,0-39,9°C	4	Ampicillin/Sulbactam	IV (parenteral)
H5-20-0392-1	Hospital 5	1939	81	2020-11-27	2020-11-27	2020-12-10	male	PREDICT	Training cohort	Staphylococcus aureus	no	no focus identified	community acquired	gp1	survived	22.302	68.3000030517578	175	yes	no	no	no	no	no	no	no	no	no	no	no	no	no	yes	yes	no	no	no	no	no	4	13	no	no	no	alert	36,1-38,9°C	0	Ampicillin/Sulbactam	IV (parenteral)
H5-20-0396-1	Hospital 5	1955	65	2020-11-13	2020-11-29	2020-12-28	male	PREDICT	Training cohort	Staphylococcus aureus	no	cardiovascular	hospital acquired	gp1	survived	29.6364	93.9000015258789	178	no	yes	yes	no	no	no	no	no	no	no	no	no	no	no	no	no	no	no	no	no	no	2	4	yes	no	no	alert	36,1-38,9°C	2	Piperacillin/Tazobactam	IV (parenteral)
H5-20-0404-1	Hospital 5	1935	85	2020-12-07	2020-12-07	2020-12-11	male	PREDICT	Training cohort	Staphylococcus aureus	no	other	community acquired	gp3	survived	33.3767	113	184	no	yes	no	no	no	no	no	no	no	no	yes	no	yes	no	yes	no	no	no	no	no	no	4	10	no	no	no	alert	35,1-36,0°C or 39,0-39,9°C	1	Ampicillin/Sulbactam	IV (parenteral)
H5-20-0415-1	Hospital 5	1940	80	2020-12-12	2020-12-12	2021-01-03	male	PREDICT	Training cohort	Staphylococcus aureus	no	respiratory	community acquired	gp2	diseased	22.6939	69.5	175	no	no	no	yes	no	no	no	no	no	no	no	no	no	no	no	no	no	no	no	no	no	4	5	no	no	no	alert	36,1-38,9°C	0	Flucloxacillin	IV (parenteral)
H5-20-0432-1	Hospital 5	1952	68	2020-12-26	2020-12-26	2021-01-04	female	PREDICT	Training cohort	Staphylococcus aureus	no	skin and soft tissue	community acquired	gp1	survived	34.6268	92	163	no	yes	no	no	no	no	no	no	no	no	no	no	no	no	no	no	no	no	no	no	no	2	3	no	no	no	alert	36,1-38,9°C	0	Cefuroxim-Natrium	IV (parenteral)
[truncated: 59 more columns]

## Sheet: dictionary
Variable / Field Name	Label
studiso_id_mb_extended	Study isolate number
centre	Study site
gebj_mb	Year of birth
age_aufstat	Age
aufstat_k_mb	Admission date
entnahm_d1_mb	Date of blood cultre sampling on day 0
entl_d_ent	Discharge date
sex_mb	Sex
Source	Study cohort
TrainingData	Analytic cohort
err1_gram_pos_mb2	Isolated microorganism
MRSA_harmonized	MRSA status
focus_harmonized	Focus at diascharge
nos_amb_mb	Aquisition type
agr_group	Agr group
Verstorben	Survival state
BMI	Body mass index
k_gewicht1_t3	Body weight
k_gre1_t3	Body hight
herzinf_t0	Prior myocardial infarction
herzinsuff_t0	Congestive heart failure
peri_ater_verschl_t0	Peripheral vascular disease
demenz_t0	Dementia
cerebrovas_erk_t0	Cerebrovascular disease
chron_lungerk_t0	Chronic pulmonary disease
kollagenose_t0	Connective tissue disease
gdulkuskrankheit_t0	Peptic ulcer disease
lei_lebererk_t0	Mild liver disease
msch_sch_lebererk_t0	Moderate to severe liver disease
dmohne_endorgan_t0	Uncomplicated diabetes mellitus
dm_endorgansch_t0	Diabetes mellitus with end organ damage
msch_sch_nierenerk_t0	Moderate to severe chronic kidney disease
halbseitenl_t0	Hemiplegia
tumorerkr_t0	Localized solid tumor
metast_sol_tumor_t0	Metastatic solid tumor
leukaemie_t0	Leukemia
lymphom_t0	Lymphoma
hiv_aids_t0	AIDS
hiv_t0	HIV status
ced_t0	Chronic inflammatory bowel disease
CCI_age_score	Age score for Charlson Comorbidity Index
CCI	Charlson Comorbidity Index on day 0
pbs_hypo_t0	Hypotension day 0
pbs_mbea_t0	Mechanical ventilation day 0
pbs_hks_t0	cardiacarrest day 0
pbs_mz_t0	Mental status day 0
pbs_temperature	Body temperature day 0
pbs_t0	Pitt Bacteremia Score on day 0
ab_1_abt	Antibiotic substance 1
ab_1_verab_abt	Way of administration of antibiotic substance 1
ab_2_abt	Antibiotic substance 2
ab_2_verab_abt	Way of administration of antibiotic substance 2
ab_3_abt	Antibiotic substance 3
ab_3_verab_abt	Way of administration of antibiotic substance 3
ab_4_abt	Antibiotic substance 4
ab_4_verab_abt	Way of administration of antibiotic substance 4
ab_5_abt	Antibiotic substance 5
ab_5_verab_abt	Way of administration of antibiotic substance 5
ab_6_abt	Antibiotic substance 6
ab_6_verab_abt	Way of administration of antibiotic substance 6
ab_7_abt	Antibiotic substance 7
ab_7_verab_abt	Way of administration of antibiotic substance 7
ab_8_abt	Antibiotic substance 8
ab_8_verab_abt	Way of administration of antibiotic substance 8
ab_9_abt	Antibiotic substance 9
ab_9_verab_abt	Way of administration of antibiotic substance 9
ab_10_abt	Antibiotic substance 10
ab_10_verab_abt	Way of administration of antibiotic substance 10
ab_11_abt	Antibiotic substance 11
ab_11_verab_abt	Way of administration of antibiotic substance 11
ab_12_abt	Antibiotic substance 12
ab_12_verab_abt	Way of administration of antibiotic substance 12
ab_13_abt	Antibiotic substance 13
ab_13_verab_abt	Way of administration of antibiotic substance 13
ab_14_abt	Antibiotic substance 14
ab_14_verab_abt	Way of administration of antibiotic substance 14
ab_15_abt	Antibiotic substance 15
ab_15_verab_abt	Way of administration of antibiotic substance 15
ab_16_abt	Antibiotic substance 16
ab_16_verab_abt	Way of administration of antibiotic substance 16
ab_17_abt	Antibiotic substance 17
ab_17_verab_abt	Way of administration of antibiotic substance 17
ab_18_abt	Antibiotic substance 18
ab_18_verab_abt	Way of administration of antibiotic substance 18
ab_19_abt	Antibiotic substance 19
ab_19_verab_abt	Way of administration of antibiotic substance 19
ab_20_abt	Antibiotic substance 20
ab_20_verab_abt	Way of administration of antibiotic substance 20
ab_21_abt	Antibiotic substance 21
ab_21_verab_abt	Way of administration of antibiotic substance 21
ab_22_abt	Antibiotic substance 22
ab_22_verab_abt	Way of administration of antibiotic substance 22
ab_23_abt	Antibiotic substance 23
ab_23_verab_abt	Way of administration of antibiotic substance 23
ab_24_abt	Antibiotic substance 24
ab_24_verab_abt	Way of administration of antibiotic substance 24
ab_25_abt	Antibiotic substance 25
ab_25_verab_abt	Way of administration of antibiotic substance 25
ab_26_abt	Antibiotic substance 26
ab_26_verab_abt	Way of administration of antibiotic substance 26
ab_27_abt	Antibiotic substance 27
ab_27_verab_abt	Way of administration of antibiotic substance 27
ab_28_abt	Antibiotic substance 28
ab_28_verab_abt	Way of administration of antibiotic substance 28
ab_29_abt	Antibiotic substance 29
ab_29_verab_abt	Way of administration of antibiotic substance 29
ab_30_abt	Antibiotic substance 30
ab_30_verab_abt	Way of administration of antibiotic substance 30
appropriatenessByInspection	Appropriateness of therapy substances and length
