# Supplementary material
Source: Research Square preprint supplement (doi:10.21203/rs.3.rs-9449451/v1)
Supplement: Supplementary file 4 [file 46580a5b3cdcfc7694f584e0.xlsx]

## Sheet: Tabelle1
Leading trait	Rank of leading trait in ANOVA	Type of annotated trait (protein-coding genes (CDS); small proteins (sORF))	UniRef100	UniRef90	Protein name (bakta)	Protein name (UniProt)	Model	Association	AUC values for each set of features taken together at the respective rank; training cohort (95% CI)	AUC values for each set of features taken together at the respective rank; validation cohort (95% CI)	Trait associated in-hospital mortality rate (95% CI)	Abundance of leading trait	Abundance of UniRef100 trait	Suggested mode of action in pathogenicity	Rank of significant trait identified by Scoary	Cluster of co-detection in absence/presence matrix
PBS	1						A		73.47% (67.99;78.94)	75.46% (65.89;85.02)
CCI	2						A		77.61% (72.75;82.48)	82.32% (74.54;90.11)
UniRef100_A0A6C0L8I7 and UniRef90_A0A6C0L8I7	3	cds	UniRef100_A0A6C0L8I7	UniRef90_A0A6C0L8I7	(pseudo) hypothetical protein	Uncharacterized protein	A; B	increased in-hospital mortality	79.22% (74.51;83.92)	82.47% (74.65;90.28)	60.6% (42.1;77.1)	0.0513219	0.0513219	unknown	1
UniRef100_Q93PN3	4	cds	UniRef100_Q93PN3	UniRef90_Q93PN3	ABC transporter substrate-binding protein	ABC transporter substrate-binding protein (fhuD1)	A	increased in-hospital mortality	79.89% (75.29;84.49)	83.56% (76.29;90.83)	28.4% (23.3;33.9)	0.460342	0.460342	metal homeostasis	8
UniRef100_Q99VY2	5	cds	UniRef100_Q99VY2	UniRef90_Q99VY2	ABC-type Mn2+/Zn2+ transport system, ATPase component	ABC superfamily ATP binding cassette transporter, ABC protein (mntA)	A	decreased in-hospital mortality	81.2% (76.92;85.47)	83.01% (75.25;90.77)	22.8% (19.4;26.6)	0.844479	0.844479	metal homeostasis	2
UniRef100_UPI0013C5277B	6	cds	UniRef100_UPI0013C5277B	UniRef90_Q7A883	Uncharacterized lipoprotein SAV0100	Lipoprotein	A	decreased in-hospital mortality	82.56% (78.56;86.56)	81.54% (72.86;90.21)	7.9% (1.7;21.4)	0.059098	0.059098	unknown	3	I
UniRef100_A7X1P3	7	cds	UniRef100_A7X1P3	UniRef90_Q5HGG8	proline--tRNA ligase	proline--tRNA ligase (proS)	A	increased in-hospital mortality	83.98% (80.05;87.91)	80.52% (71.95;89.08)	31.3% (21.6;42.4)	0.129082	0.129082	translation	5
UniRef100_A0A1D4BGR3	8	cds	UniRef100_A0A1D4BGR3	UniRef90_T1Y5M5	Transcriptional regulator, TetR family protein	Transcriptional regulator	A	decreased in-hospital mortality	85.1% (81.5;88.7)	80.14% (71.34;88.93)	20.3% (15.2;26.1)	0.353033	0.353033	transcription
sex	9						A		85.07% (81.35;88.79)	80.7% (72.28;89.12)
UniRef100_A0A658X0A3 and UniRef90_A0A380EDU5	10; 32	cds	UniRef100_A0A658X0A3	UniRef90_A0A380EDU5	Helix-turn-helix family protein	Helix-turn-helix transcriptional regulator	A; B	increased in-hospital mortality	85.67% (81.99;89.36) and 86.64% (83.05;90.22)	79.76% (71.16;88.35) and 76.65% (67.85;85.45)	37.1% (21.5;55.1)	5.4% and 5.6%	5.4%	transcription	7
UniRef100_A0A0E0VRF1	11	cds	UniRef100_A0A0E0VRF1	UniRef90_Q2FXQ9	glutamyl-tRNA reductase	Glutamyl-tRNA reductase	A	decreased in-hospital mortality	85.84% (82.15;89.52)	79.41% (70.87;87.95)	10.3% (2.9;24.2)	0.0606532	0.0606532	translation
UniRef100_A0A0U1MPD4	12	cds	UniRef100_A0A0U1MPD4	UniRef90_A0A0E1X6B0	Uncharacterized NAD(P)/FAD-binding protein YdhS	Pyridine nucleotide-disulfide oxidoreductase	A	decreased in-hospital mortality	86.13% (82.47;89.78)	80.38% (72.17;88.59)	14.8% (7.9;24.4)	0.125972	0.125972	unknown
UniRef100_A0A0E0VLV9	13	cds	UniRef100_A0A0E0VLV9	UniRef90_A0A2K4AEJ9	Serine transporter YbeC, amino acid:H+ symporter family	Amino acid-polyamine-organocation superfamily	A	decreased in-hospital mortality	86.59% (82.97;90.21)	78.26% (69.64;86.89)	16.7% (11.4;23.2)	0.261275	0.261275	detoxification	9
UniRef100_B6V395 and UniRef90_A0A0U1MRA0	14; 9	cds	UniRef100_B6V395	UniRef90_A0A0U1MRA0	DUF961 domain-containing protein	DUF961 domain-containing protein	A; B	increased in-hospital mortality	87.19% (83.68;90.7) and 84.2% (80.31;88.09)	78.46% (69.64;87.27) and 80.17% (71.88;88.46)	36% (28;44.7)	21.2% and 29.7%	0.211509	unknown
UniRef100_A0A0D1JN68	15	cds	UniRef100_A0A0D1JN68	UniRef90_A0A0D3QBD0	nisin susceptibility-associated two-component system response regulator NsaR	DNA-binding response regulator (yvcP)	A	increased in-hospital mortality	87.54% (84.13;90.95)	77.69% (68.78;86.6)	28.5% (22.1;35.6)	0.289269	0.289269	transcription
UniRef100_W8TUA8	16	cds	UniRef100_W8TUA8	UniRef90_W8TUA8	Xanthine/guanine/uracil/vitamin C permease GhxP/GhxQ, nucleobase:cation symporter 2 (NCS2) family	Guanine permease (pbuG)	A	increased in-hospital mortality	87.84% (84.51;91.17)	78.51% (69.75;87.26)	27.4% (23.5;31.6)	0.749611	0.749611	metabolism
UniRef100_D2J5X0 and UniRef90_Q76LS8	17;19	cds	UniRef100_D2J5X0	UniRef90_Q76LS8	staphylococcal enterotoxin type R	Exotoxin (entG)	A; B	increased in-hospital mortality	88.08% (84.76;91.41) and 86.35% (82.73;89.97)	79.03% (70.42;87.64) and 78.87% (70.34;87.39)	44.4% (27.9;61.9)	5,6% and 5,9%	0.0559876	superantigen		III
UniRef100_A0A0E0VQN1	18	cds	UniRef100_A0A0E0VQN1	UniRef90_Q6GEZ1	D-alanine--D-alanine ligase	D-alanine--D-alanine ligase	A	decreased in-hospital mortality	88.23% (84.93;91.54)	78.1% (69.45;86.75)	16.3% (10.5;23.6)	0.209953	0.209953	cell wall integrity
UniRef100_A0A0U1MTM9	19	cds	UniRef100_A0A0U1MTM9	UniRef90_Q7DI45	AraC-type DNA-binding domain and AraC-containing proteins	Transcriptional regulator, AraC family	A	decreased in-hospital mortality	88.45% (85.26;91.63)	78.62% (69.95;87.3)	11.3% (4.7;21.9)	0.096423	0.096423	transcription
UniRef100_W8UVY3	20	cds	UniRef100_W8UVY3	UniRef90_A0A7U7PWB3	DNA-binding transcriptional regulator, HxlR family	Transcriptional regulator (yybR)	A	increased in-hospital mortality	88.7% (85.56;91.83)	77.92% (69.12;86.72)	25.9% (22.3;29.6)	0.902022	0.902022	transcription
UniRef100_W8TTH4	21	cds	UniRef100_W8TTH4	UniRef90_A0A0H2WZT4	fatty acid efflux pump transcriptional regulator FarR	Fatty acid efflux pump transcriptional regulator FarR (farR)	A	increased in-hospital mortality	88.74% (85.6;91.88)	77.88% (69.18;86.59)	28.8% (23.7;34.4)	0.4479	0.4479	transcription
UniRef100_A0A2X3WAT2	22	cds	UniRef100_A0A2X3WAT2	UniRef90_A0A133QD13	Small heat shock protein IbpA, HSP20 family	Small heat shock protein	A	increased in-hospital mortality	88.69% (85.5;91.87)	78.12% (69.46;86.78)	28.9% (22.8;35.7)	0.317263	0.317263	detoxification
UniRef100_A6U4X7	23	cds	UniRef100_A6U4X7	UniRef90_B9DKF6	aspartate 1-decarboxylase	Aspartate 1-decarboxylase (PanD)	A	increased in-hospital mortality	88.79% (85.65;91.94)	77.79% (69.03;86.55)	29.1% (24.5;34.1)	0.55521	0.55521	metabolism
UniRef100_Q2FJ80	24	cds	UniRef100_Q2FJ80	UniRef90_Q2FJ80	FMN-dependent NADPH-azoreductase	FMN-dependent NADPH-azoreductase (azo1)	A	increased in-hospital mortality	89.18% (86.12;92.23)	77.52% (68.67;86.36)	27.5% (23.5;31.9)	0.716952	0.716952	detoxification
UniRef100_A0A0E0VRX2	25	cds	UniRef100_A0A0E0VRX2	UniRef90_A0A391LQP8	zinc ABC transporter substrate-binding lipoprotein AdcA	High-affinity zinc uptake system protein znuA	A	decreased in-hospital mortality	89.42% (86.39;92.45)	77.4% (68.47;86.32)	16.3% (10.4;23.8)	0.200622	0.200622	metal homeostasis
UniRef100_A0A4U2KP01	26	cds	UniRef100_A0A4U2KP01	UniRef90_M1T2Y5	phage holin	phage holin	A	increased in-hospital mortality	89.77% (86.79;92.75)	76.86% (67.85;85.86)	40% (22.7;59.4)	0.0466563	0.0466563	unknown
UniRef100_UPI0002CA386D	27	cds	UniRef100_UPI0002CA386D	UniRef90_A0A0S3CVQ3	Fibronectin-binding protein A	Fibronectin-binding protein A	A	increased in-hospital mortality	89.88% (86.91;92.85)	76.54% (67.48;85.61)	37.3% (24.1;51.9)	0.0793157	0.0793157	adhesion	6
UniRef100_Q2FIJ2	28	cds	UniRef100_Q2FIJ2	UniRef90_Q2FIJ2	Organic hydroperoxide resistance protein-like	Organic hydroperoxide resistance protein-like	A	increased in-hospital mortality	89.99% (87.02;92.97)	76.89% (67.97;85.82)	28.3% (22.4;34.8)	0.340591	0.340591	detoxification
UniRef100_A7X388	29	cds	UniRef100_A7X388	UniRef90_Q5HNN6	glutamate-1-semialdehyde 2,1-aminomutase	Glutamate-1-semialdehyde 2,1-aminomutase 1 (hemL1)	A	increased in-hospital mortality	90.15% (87.25;93.05)	76.25% (67.22;85.29)	31.3% (24;39.4)	0.233281	0.233281	metabolism
UniRef100_X5EHN8	30	cds	UniRef100_X5EHN8	UniRef90_A0A133PWA4	DUF218 domain-containing protein	Membrane protein	A	increased in-hospital mortality	90.29% (87.38;93.2)	76.45% (67.57;85.33)	29% (23.2;35.3)	0.359253	0.359253	unknown
UniRef100_A0A0U1MTN8	31	cds	UniRef100_A0A0U1MTN8	UniRef90_W8U2Z7	DUF2867 domain-containing protein	NmrA family protein	A	decreased in-hospital mortality	90.32% (87.36;93.27)	76.49% (67.56;85.42)	12.5% (5.6;23.2)	0.0995334	0.0995334	biofilm formation
UniRef100_A0A0E0VS49	32	cds	UniRef100_A0A0E0VS49	UniRef90_A0A133PU93	transcription termination factor Rho	Transcription termination factor Rho	A	decreased in-hospital mortality	90.43% (87.51;93.35)	76.25% (67.33;85.18)	16.9% (11.2;23.9)	0.230171	0.230171	transcription
UniRef100_A7X2H3	33	cds	UniRef100_A7X2H3	UniRef90_A7X2H3	nucleoside-diphosphate kinase	Nucleoside diphosphate kinase (ndk)	A	increased in-hospital mortality	90.45% (87.52;93.38)	76.47% (67.61;85.32)	27.2% (23.3;31.3)	0.790047	0.790047	metabolism
UniRef100_A0A2S6DFD5	34	cds	UniRef100_A0A2S6DFD5	UniRef90_A0A3M8WRZ5	AraC-type DNA-binding domain and AraC-containing proteins	AraC family transcriptional regulator	A	decreased in-hospital mortality	90.54% (87.65;93.43)	76.1% (67.3;84.89)	11.1% (3.1;26.1)	0.0559876	0.0559876	transcription
UniRef100_A0A2S6D6Q7	35	cds	UniRef100_A0A2S6D6Q7	UniRef90_A0A0D6HZA6	Esterase/lipase	Carboxylesterase (est_2)	A	decreased in-hospital mortality	90.59% (87.72;93.46)	75.32% (66.45;84.19)	14.6% (6.1;27.8)	0.0746501	0.0746501	detoxification
UniRef100_A0A133PU93	36	cds	UniRef100_A0A133PU93	UniRef90_A0A133PU93	transcription termination factor Rho	Transcription termination factor Rho (rho_1)	A	increased in-hospital mortality	90.66% (87.78;93.53)	76.56% (67.95;85.18)	27.4% (23.4;31.8)	0.709176	0.709176	transcription
UniRef100_D2J5X2 and UniRef90_A0A1W5ISY9	37; 18	cds	UniRef100_D2J5X2	UniRef90_A0A1W5ISY9	DNA-binding transcriptional regulator, MarR family	Transcriptional regulator, MarR family (ohrR)	A; B	increased in-hospital mortality	90.69% (87.84;93.54) and 86.32% (82.68;89.95)	76.64% (68.04;85.24) and 79.22% (70.84;87.59)	42.5% (27;59.1)	6.2% and 11.2%	6.2%	transcription		III
UniRef100_A7X350	38	cds	UniRef100_A7X350	UniRef90_Q49Y73	adenine phosphoribosyltransferase	Adenine phosphoribosyltransferase (apt)	A	increased in-hospital mortality	90.81% (87.98;93.63)	76.37% (67.81;84.93)	27% (23.2;31.1)	0.777605	0.777605	metabolism
UniRef100_Q2FXR3	39	cds	UniRef100_Q2FXR3	UniRef90_Q2FXR3	porphobilinogen synthase	Delta-aminolevulinic acid dehydratase (hemB)	A	increased in-hospital mortality	90.88% (88.08;93.69)	76.12% (67.44;84.8)	26.9% (23.1;31)	0.786936	0.786936	metabolism
UniRef100_A0A9Q8H2H2 and UniRef90_A0A9Q8H2H2	40; 13	sorf	UniRef100_A0A9Q8H2H2	UniRef90_A0A9Q8H2H2	Secreted protein	Uncharacterized protein	A; B	increased in-hospital mortality	90.84% (88.03;93.66) and 85.08% (81.28;88.89)	75.48% (66.55;84.4) and 79.23% (70.92;87.55)	28.2% (23.3;33.6)	0.479005	0.479005	unknown
UniRef100_A0A0D6GEK5	41	cds	UniRef100_A0A0D6GEK5	UniRef90_A0A090LQF4	Acyl-CoA thioesterase PaaI, contains HGG motif	Thioesterase (ydiI)	A	increased in-hospital mortality	90.87% (88.09;93.65)	75.51% (66.59;84.44)	28.8% (22.8;35.5)	0.323484	0.323484	metabolism
UniRef100_W8UXA3	42	cds	UniRef100_W8UXA3	UniRef90_W8UXA3	Biotin carboxylase	Acetyl-CoA carboxylase biotin carboxylase subunit (accC)	A	increased in-hospital mortality	91.08% (88.33;93.83)	75.75% (66.88;84.61)	28.9% (23.6;34.7)	0.419907	0.419907	metabolism
UniRef100_Q2G0K7	43	cds	UniRef100_Q2G0K7	UniRef90_Q2G0K7	3-hexulose-6-phosphate synthase	3-hexulose-6-phosphate synthase	A	increased in-hospital mortality	91.21% (88.5;93.92)	75.46% (66.58;84.33)	29.4% (23.3;36.2)	0.317263	0.317263	detoxification
UniRef100_T1Y821	44	cds	UniRef100_T1Y821	UniRef90_P64141	dihydropteroate synthase	Dihydropteroate synthase	A	increased in-hospital mortality	91.24% (88.53;93.95)	74.93% (65.86;84)	30.8% (22.1;40.6)	0.161742	0.161742	metabolism
UniRef100_B2ZYZ2	45	cds	UniRef100_B2ZYZ2	UniRef90_B2ZYZ2	Tail protein	Tail protein (orf54)	A	increased in-hospital mortality	91.25% (88.55;93.96)	74.91% (65.88;83.94)	41.5% (26.3;57.9)	0.0637636	0.0637636	unknown
UniRef100_V5YRT8	46	cds	UniRef100_V5YRT8	UniRef90_B9DID7	Phosphoribosyl 1,2-cyclic phosphate phosphodiesterase	MBL fold metallo-hydrolase (yycJ)	A	increased in-hospital mortality	91.32% (88.63;94.01)	75.15% (66.2;84.09)	29.1% (22.8;36)	0.304821	0.304821	metabolism
UniRef100_W8TRM3	47	cds	UniRef100_W8TRM3	UniRef90_T1YC72	putative thiol-disulfide oxidoreductase YuxK, DCC family	DUF393 domain-containing protein	A	increased in-hospital mortality	91.36% (88.65;94.07)	74.62% (65.64;83.6)	28.8% (22.9;35.3)	0.340591	0.340591	detoxification
UniRef100_A0A7U7EV04	48	sorf	UniRef100_A0A7U7EV04	UniRef90_A0A7U7EV04	Hypothetical phage protein	Hypothetical phage protein	A	increased in-hospital mortality	91.37% (88.66;94.07)	74.86% (65.97;83.76)	35.2% (25.4;45.9)	0.141524	0.141524	unknown		II
UniRef100_A0A090LYE4	49	cds	UniRef100_A0A090LYE4	UniRef90_A0A090LYE4	Co/Zn/Cd efflux system component	Cadmium, cobalt and zinc/H(+)-K(+) antiporter (czcD)	A	decreased in-hospital mortality	91.39% (88.66;94.12)	74.63% (65.74;83.52)	16.2% (11.1;22.4)	0.278383	0.278383	heavy metal resistance
UniRef100_O80068	50	cds	UniRef100_O80068	UniRef90_C5I622	Phage integrase	Integrase	A	increased in-hospital mortality	91.4% (88.66;94.13)	74.13% (65.15;83.11)	35.6% (25.7;46.3)	0.139969	0.139969	recombination		II
UniRef100_A0A0C2HX83	51	cds	UniRef100_A0A0C2HX83	UniRef90_A0A7U7IEC9	Cell fate regulator YaaT, PSP1 superfamily (controls sporulation, competence, biofilm development)	Signal peptidase II (yaaT)	A	decreased in-hospital mortality	91.42% (88.68;94.16)	74.28% (65.32;83.24)	18.6% (13.7;24.3)	0.343701	0.343701	biofilm formation
UniRef100_W8UTL6	52	cds	UniRef100_W8UTL6	UniRef90_A0A7U7EX66	DNA-binding transcriptional regulator, MurR/RpiR family, contains HTH and SIS domains	RpiR family transcriptional regulator (rpiR)	A	increased in-hospital mortality	91.39% (88.65;94.14)	74.46% (65.53;83.38)	27.4% (23.4;31.7)	0.720062	0.720062	transcription
UniRef100_D2J5W1 and UniRef90_A0A1D0BP50	53; 24	cds	UniRef100_D2J5W1	UniRef90_A0A1D0BP50	Phage protein	Uncharacterized protein	A; B	increased in-hospital mortality	91.42% (88.68;94.16) and 86.54% (82.94;90.14)	74.26% (65.42;83.11) and 77.02% (68.22;85.82)	45.5% (28.1;63.6)	5.1% and 5.8%	0.0513219	unknown		III
UniRef100_D2J5X3	54	cds	UniRef100_D2J5X3	UniRef90_D2J728	Site-specific DNA recombinase SpoIVCA/DNA invertase PinE	DNA integration/recombination/inversion protein (sin)	A	increased in-hospital mortality	91.42% (88.69;94.16)	74.44% (65.58;83.3)	44.4% (27.9;61.9)	0.0559876	0.0559876	recombination		III
UniRef100_W8U5T5	55	cds	UniRef100_W8U5T5	UniRef90_W8U5T5	DNA helicase RecQ	DNA helicase RecQ (recQ_1)	A	increased in-hospital mortality	91.4% (88.65;94.14)	74.42% (65.57;83.26)	29% (24.5;33.9)	0.578538	0.578538	transcription
UniRef100_A6U0P1	56	cds	UniRef100_A6U0P1	UniRef90_Q2FZI6	bifunctional phosphoribosylaminoimidazolecarboxamide formyltransferase/IMP cyclohydrolase	Bifunctional purine biosynthesis protein PurH (purH)	A	increased in-hospital mortality	91.39% (88.63;94.14)	74.51% (65.69;83.33)	29.4% (22.3;37.3)	0.237947	0.237947	metabolism
UniRef100_P68799	57	cds	UniRef100_P68799	UniRef90_P68799	complement convertase inhibitor Efb	Fibrinogen-binding protein (fib)	A	increased in-hospital mortality	91.39% (88.63;94.15)	74.73% (65.92;83.53)	30.3% (23.1;38.2)	0.236392	0.236392	adhesion
UniRef100_W8TRN2	58	cds	UniRef100_W8TRN2	UniRef90_A0A2K4AED1	Lipoprotein	Exported protein	A	increased in-hospital mortality	91.41% (88.65;94.16)	74.94% (66.15;83.74)	27.4% (22.2;33.1)	0.426128	0.426128	unknown
UniRef100_C4TFC1	59	cds	UniRef100_C4TFC1	UniRef90_C4TFC1	Cystatin-like fold lipoprotein	Cystatin-like fold lipoprotein	A	increased in-hospital mortality	91.42% (88.66;94.18)	74.79% (65.95;83.62)	32.8% (21.6;45.7)	0.0995334	0.0995334	unknown
UniRef100_A7X1H4	60	cds	UniRef100_A7X1H4	UniRef90_Q2FHM2	methionyl-tRNA formyltransferase	Methionyl-tRNA formyltransferase (fmt)	A	increased in-hospital mortality	91.42% (88.66;94.18)	74.73% (65.9;83.56)	29.3% (24.4;34.7)	0.493002	0.493002	translation
UniRef100_W8U2Z7	61	cds	UniRef100_W8U2Z7	UniRef90_W8U2Z7	DUF2867 domain-containing protein	NAD dependent epimerase/dehydratase family protein (azoB)	A	increased in-hospital mortality	91.41% (88.65;94.17)	74.84% (66.01;83.68)	27.8% (22.2;33.8)	0.381026	0.381026	cell wall integrity
UniRef100_A0A9Q4V4N4	62	cds	UniRef100_A0A9Q4V4N4	UniRef90_Q99VB6	Putative O-acetyltransferase MW0856	Acetyltransferase	A	increased in-hospital mortality	91.38% (88.61;94.14)	75% (66.17;83.83)	32.7% (19.9;47.5)	0.0762053	0.0762053	unknown
UniRef100_A0A9P1QL98	63	cds	UniRef100_A0A9P1QL98	UniRef90_A0A7U7PXI0	Putative permease for export of a regulatory peptide	Antibiotic transport system permease	A	increased in-hospital mortality	91.37% (88.6;94.13)	74.94% (66.14;83.74)	32.1% (23.6;41.6)	0.174184	0.174184	transport protein
UniRef100_A0A090LQF4	64	cds	UniRef100_A0A090LQF4	UniRef90_A0A090LQF4	Acyl-CoA thioesterase PaaI, contains HGG motif	ComA operon protein 2 (yuxO)	A	decreased in-hospital mortality	91.38% (88.61;94.14)	75% (66.22;83.78)	18.3% (13.4;24)	0.340591	0.340591	transcription
UniRef100_A0A0S2J5S7	65	cds	UniRef100_A0A0S2J5S7	UniRef90_A0A166MK47	Phage protein	Phage protein	A	decreased in-hospital mortality	91.38% (88.62;94.15)	75.06% (66.28;83.84)	20% (15.2;25.5)	0.388802	0.388802	unknown
UniRef100_E4PYM0	66	cds	UniRef100_E4PYM0	UniRef90_Q938S1	cadmium resistance transporter CadD	Cadmium resistance transporter CadD	A	increased in-hospital mortality	91.4% (88.64;94.17)	75.1% (66.35;83.85)	30.7% (22.4;40)	0.177294	0.177294	heavy metal resistance
UniRef100_D2J5W0	67	cds	UniRef100_D2J5W0	UniRef90_E4PYC6	Replication initiaton protein REP (rolling circle plasmid replication)	Replication initiation protein Rep domain protein	A	increased in-hospital mortality	91.41% (88.65;94.17)	73.08% (63.79;82.36)	43.2% (27.1;60.5)	0.0575428	0.0575428	replication		III
UniRef100_D2J5W8 and UniRef90_D2J5W8	67;24		UniRef100_D2J5W8	UniRef90_D2J5W8	hypothetical protein	Uncharacterized protein	A; B		91.41% (88.65;94.17) and 86.54% (82.94;90.14)	73.08% (63.79;82.36) and 77.02% (68.22;85.82)		0.0575428		unknown		III
UniRef100_D2J5Y9	67		UniRef100_D2J5Y9	UniRef90_A0A0U1MW80	putative membrane protein	membrane protein	A		91.41% (88.65;94.17)	73.08% (63.79;82.36)		0.0575428		unknown		III
UniRef100_D2J5Z4 and UniRef90_D2J5Z4	67;24		UniRef100_D2J5Z4	UniRef90_D2J5Z4	Replication protein	Rep	A; B		91.41% (88.65;94.17) and 86.54% (82.94;90.14)	73.08% (63.79;82.36) and 77.02% (68.22;85.82)		0.0575428		replication		III
UniRef100_O85217 and UniRef90_Q76LS7	67;19		UniRef100_O85217	UniRef90_Q76LS7	staphylococcal enterotoxin type J	Enterotoxin J (sej)	A; B		91.41% (88.65;94.17) and 86.35% (82.73;89.97)	73.08% (63.79;82.36) and 78.87% (70.34;87.39)		5,8% and 5,9%		superantigen		III
UniRef100_Q8VVU3	67		UniRef100_Q8VVU3	UniRef90_A0A6H3QHI7	Chromosome-anchoring protein RacA	Replication-associated protein	A		91.41% (88.65;94.17)	73.08% (63.79;82.36)		0.0575428		replication		III
UniRef100_A0A517IVA3	68	cds	UniRef100_A0A517IVA3	UniRef90_A0A7U7JRX7	Tandem-type lipoprotein	Staphylococcal tandem lipoprotein	A	decreased in-hospital mortality	91.41% (88.64;94.17)	72.67% (63.41;81.93)	8.1% (1.7;21.9)	0.0575428	0.0575428	unknown	4	I
UniRef100_A0A2R4A9A6 and UniRef90_D2J9Q1	69; 34	cds	UniRef100_A0A2R4A9A6	UniRef90_D2J9Q1	Replication protein	Conserved domain-containing protein	A; B	increased in-hospital mortality	91.44% (88.68;94.19) and 86.66% (83.08;90.24)	72.65% (63.39;81.91) and 76.48% (67.64;85.31)	35.6% (24.7;47.7)	0.11353	0.11353	replication
UniRef100_Q99RL9	70	cds	UniRef100_Q99RL9	UniRef90_Q2FVL6	DUF4467 domain-containing protein	Lipoprotein	A	increased in-hospital mortality	91.44% (88.69;94.2)	72.59% (63.31;81.88)	27.2% (22.9;31.8)	0.62986	0.62986	unknown
UniRef100_A0A3M7WI19	71	cds	UniRef100_A0A3M7WI19	UniRef90_A0A3M7WI19	flippase GtxA	GtrA family protein (gtrA)	A	increased in-hospital mortality	91.43% (88.68;94.19)	72.61% (63.32;81.91)	28.7% (22.1;36.1)	0.270607	0.270607	transport protein
UniRef100_Q99SA3	72	cds	UniRef100_Q99SA3	UniRef90_Q99SA3	PTS system mannitol-specific EIICB component	PTS system mannitol-specific EIICB component (mtlA)	A	increased in-hospital mortality	91.43% (88.67;94.19)	72.61% (63.3;81.92)	29.5% (24;35.4)	0.40591	0.40591	metabolism
UniRef100_A0A9Q4UZ40	73	cds	UniRef100_A0A9Q4UZ40	UniRef90_A7WZS6	Phosphoglycerate kinase	Phosphoglycerate kinase	A	increased in-hospital mortality	91.43% (88.66;94.19)	72.67% (63.37;81.96)	33.3% (20;49)	0.0699844	0.0699844	metabolism
UniRef100_A0A0E0VMP6	74	cds	UniRef100_A0A0E0VMP6	UniRef90_A0A4T9Z1K5	Phosphotransferase system, galactitol-specific IIB component	PTS system, IIB component	A	decreased in-hospital mortality	91.43% (88.67;94.19)	72.61% (63.3;81.92)	12.5% (4.7;25.2)	0.0746501	0.0746501	metabolism
UniRef100_T1Y9A8	75	cds	UniRef100_T1Y9A8	UniRef90_A0A0H2WZM9	bifunctional phosphopantothenoylcysteine decarboxylase/phosphopantothenate--cysteine ligase CoaBC	Coenzyme A biosynthesis bifunctional protein CoaBC	A	increased in-hospital mortality	91.43% (88.68;94.19)	72.63% (63.33;81.93)	28.2% (24.1;32.6)	0.699844	0.699844	metabolism
PBS	1						B		73.47% (67.99;78.94)	75.46% (65.89;85.02)
CCI	2						B		77.61% (72.75;82.48)	82.32% (74.54;90.11)
UniRef90_UPI0007C9FD14	4	cds	NA	UniRef90_UPI0007C9FD14	hyperosmolarity resistance protein Ebh	hyperosmolarity resistance protein Ebh	B	increased in-hospital mortality	80.68% (76.18;85.18)	82.02% (73.99;90.05)	36.7% (23.4;51.7)	0.0762053	NA	cell wall integrity
UniRef90_A0A0H2WXP4	5	cds	UniRef100_M9NSW6	UniRef90_A0A0H2WXP4	Cytosolic protein	Cytosolic protein	B	increased in-hospital mortality	81.46% (76.96;85.97)	79.97% (71.51;88.44)	26.8% (22.8;31.1)	0.720062	0.321928	unknown
			UniRef100_A0A0H2WXP4										0.270607
			UniRef100_A0A0H2B2F3										0.096423
			UniRef100_R9QT81										0.066874
			UniRef100_A0A9Q8DF10										0.0279938
			UniRef100_A0A2W2M393										0.00933126
			UniRef100_A0A6A8FA25										0.00155521
			NA										NA
UniRef90_UPI001159574B	6	cds	NA	UniRef90_UPI001159574B	TIGR01741 family protein	TIGR01741 family protein	B	increased in-hospital mortality	82.41% (78.06;86.75)	78.11% (69.48;86.73)	35% (20.6;51.7)	0.0622084	NA	genome editing
sex	7			sex_mb			B		82.83% (78.67;86.98)	79.8% (71.43;88.17)
UniRef90_A0A7U7AW69	8	cds	UniRef100_A0A9Q8DG16	UniRef90_A0A7U7AW69	Transposase	Transposase	B	decreased in-hospital mortality	83.49% (79.47;87.5)	80.63% (72.51;88.76)	3.3% (0.1;17.2)	0.0466563	0.00311042	recombination
			NA										NA
UniRef90_A0A0U1MRA0	9	cds	UniRef100_A0A0U1MRA0	UniRef90_A0A0U1MRA0	DUF961 domain-containing protein	DUF961 domain-containing protein	B	increased in-hospital mortality	84.2% (80.31;88.09)	80.17% (71.88;88.46)	29.8% (23.5;36.9)	0.297045	0.0684292	unknown
			UniRef100_A0A6A9GYE2										0.00777605
			NA										NA
UniRef90_A0A133QB87	9	cds	UniRef100_B6V394	UniRef90_A0A133QB87	Transposon-related protein	Transposon-related protein	B	increased in-hospital mortality	84.2% (80.31;88.09)	80.17% (71.88;88.46)	29.8% (23.5;36.9)	0.29549	0.26283	recombination
			UniRef100_D2JAS2										0.0171073
			NA										0.00622084
			UniRef100_A0A133QB87										0.00466563
			UniRef100_UPI000AA659E4										0.00311042
			UniRef100_UPI000768F2C1										0.00155521
UniRef90_A0A6K4ARI6	10	cds	NA	UniRef90_A0A6K4ARI6	Conserved virulence factor C	Conserved virulence factor C	B	increased in-hospital mortality	84.37% (80.45;88.28)	79.03% (70.57;87.49)	35.4% (23.9;48.2)	0.101089	NA	cytotoxicity
UniRef90_O80069	11	cds	UniRef100_C5I623	UniRef90_O80069	ATPase	ATPase	B	increased in-hospital mortality	84.81% (80.96;88.66)	78.55% (69.74;87.37)	29.3% (23.1;36.2)	0.307932	0.125972	unknown
			UniRef100_G4KNR9										0.0808709
			UniRef100_A0A2I6PDE9										0.0326594
			UniRef100_A0A5F2KBH5										0.029549
			UniRef100_UPI0001D428D0										0.0124417
			UniRef100_UPI002572E4CA										0.00777605
			UniRef100_A0A641AAP1										0.00311042
			UniRef100_UPI000DA7FCE8										0.00311042
			UniRef100_UPI00021AE749										0.00155521
			UniRef100_UPI00030E40F2										0.00155521
			UniRef100_A0A8E7KYU8										0.00155521
			UniRef100_A0A9Q4Y9I2										0.00155521
			UniRef100_UPI000DE57458										0.00155521
			UniRef100_UPI000ACA446D										0.00155521
			NA										NA
UniRef90_S4V7K0	12	cds	UniRef100_A0A9N8NU47	UniRef90_S4V7K0	DUF1024 domain-containing protein	DUF1024 domain-containing protein	B	increased in-hospital mortality	84.94% (81.12;88.76)	78.03% (69.19;86.87)	33.1% (25.3;41.7)	0.211509	0.0264386	unknown
			UniRef100_UPI0006E4CBA4										0.00311042
			UniRef100_Q4ZB54										0.0155521
			UniRef100_A0A517IV85										0.00933126
			UniRef100_A0A658BGN1										0.00777605
			UniRef100_A0A6B5Q3U5										0.00777605
			UniRef100_UPI00044D5CB7										0.00777605
			UniRef100_UPI000DAA0CC1										0.00777605
			UniRef100_S4V7K0										0.00622084
			UniRef100_UPI00045087C8										0.00622084
			UniRef100_A0A345AQ96										0.00622084
			UniRef100_UPI0001B3B41A										0.00622084
			UniRef100_UPI0001C0B66A										0.00622084
			UniRef100_A0A7I8NK01										0.00466563
			UniRef100_UPI00024C322B										0.00311042
			UniRef100_A0A0E3T8I2										0.00311042
			UniRef100_A0A6B5IX22										0.00311042
			UniRef100_UPI000445159E										0.00311042
			UniRef100_UPI001CC6B829										0.00311042
			UniRef100_UPI00044803DF										0.00311042
			UniRef100_UPI0007698DDB										0.00311042
			UniRef100_UPI000A321379										0.00311042
			UniRef100_A0A8G2MBQ1										0.00311042
			UniRef100_A0A6G4IX56										0.00155521
			UniRef100_UPI00006E845C										0.00155521
			UniRef100_A0A6B3IPQ0										0.00155521
			UniRef100_UPI000423BFFA										0.00155521
			UniRef100_UPI0002CA797D										0.00155521
			UniRef100_UPI00044C8E6E										0.00155521
			UniRef100_UPI0004931EAA										0.00155521
			UniRef100_UPI00044BE67F										0.00155521
			UniRef100_UPI0004462F13										0.00155521
			UniRef100_UPI0004483912										0.00155521
			UniRef100_UPI00044692CB										0.00155521
			UniRef100_UPI000539C52D										0.00155521
			UniRef100_UPI00069AAF9B										0.00155521
			UniRef100_UPI000CD304F2										0.00155521
			UniRef100_UPI000CD1CCF2										0.00155521
			UniRef100_UPI000DA73F78										0.00155521
			UniRef100_UPI0008AA5506										0.00155521
			UniRef100_UPI00090FF35F										0.00155521
			UniRef100_A0A380DP79										0.00155521
			UniRef100_UPI001CA8C0D2										0.00155521
			UniRef100_UPI0015790B91										0.00155521
			NA										NA
UniRef90_A0A0E1VWP5	14	cds	UniRef100_A0A9Q4YEV4	UniRef90_A0A0E1VWP5	Xaa-Pro dipeptidyl-peptidase-like domain-containing protein	Xaa-Pro dipeptidyl-peptidase-like domain-containing protein	B	decreased in-hospital mortality	85.35% (81.59;89.11)	78.61% (70;87.23)	19.6% (15.1;24.9)	0.419907	0.147745	metabolism
			UniRef100_A0A0E1VWP5										0.11353
			UniRef100_A0A2S6DNE5										0.0544323
			UniRef100_A0A7Z8GBX4										0.0513219
			UniRef100_A0A6A9GSV8										0.0124417
			UniRef100_UPI0002CBDC16										0.0108865
			UniRef100_UPI00024239D2										0.00311042
			UniRef100_UPI0002BBD0E6										0.00311042
			UniRef100_UPI00038F293B										0.00311042
			UniRef100_UPI00187B06EC										0.00155521
			NA										NA
UniRef90_B2ZYU9	15	cds	UniRef100_M9NRM6	UniRef90_B2ZYU9	Phage protein	Phage protein (orf11)	B	increased in-hospital mortality	85.76% (82.06;89.46)	78.5% (69.92;87.08)	27.2% (23.2;31.6)	0.696734	0.290824	unknown
			UniRef100_A0A2R7XHV8										0.183515
			UniRef100_A0A2S6DEL8										0.122862
			UniRef100_C8CGY5										0.0451011
			UniRef100_A0A1S5YNK4										0.0388802
			UniRef100_A0A9X9K178										0.0217729
			UniRef100_A0A163SIN8										0.0155521
			UniRef100_Q4ZAE2										0.0108865
			UniRef100_A0A9Q4YLA7										0.0108865
			UniRef100_A0A059T7J6										0.00933126
			UniRef100_A0A6B5IDU1										0.00933126
			UniRef100_UPI0002FB89C1										0.00777605
			UniRef100_A0A9N8NP86										0.00777605
			UniRef100_A0A348H4S7										0.00777605
			UniRef100_A0A380DLR6										0.00466563
			UniRef100_E9LT78										0.00466563
			UniRef100_UPI0004486FED										0.00466563
			UniRef100_UPI000A100191										0.00466563
			UniRef100_UPI00024C32C7										0.00311042
			UniRef100_UPI0004488406										0.00311042
			UniRef100_UPI0002F79813										0.00155521
			UniRef100_O80077										0.00155521
			UniRef100_A0A290QRP3										0.00155521
			UniRef100_A9CR58										0.00155521
			UniRef100_UPI0002CAC484										0.00155521
			UniRef100_UPI0003EB940A										0.00155521
			UniRef100_A0A9P1VPI1										0.00155521
			UniRef100_UPI00044E6B84										0.00155521
			UniRef100_UPI00044828AD										0.00155521
			UniRef100_UPI0004529926										0.00155521
			UniRef100_UPI000806ED19										0.00155521
			UniRef100_UPI000915D3A3										0.00155521
			UniRef100_A0A517JRI5										0.00155521
			UniRef100_A0A6H3Q6B5										0.00155521
			UniRef100_UPI000BF60035										0.00155521
			UniRef100_UPI000B1AE406										0.00155521
			UniRef100_A7YGP5										0.00155521
UniRef90_M1XGR1	16	cds	UniRef100_E9KNQ5	UniRef90_M1XGR1	DUF1643 domain-containing protein	Ribosomal RNA large subunit methyltransferase (rlmE)	B	increased in-hospital mortality	85.97% (82.29;89.66)	78.54% (70.04;87.03)	47.5% (31.5;63.9)	0.0622084	0.0264386	translation
			UniRef100_M1XGR1										0.0155521
			UniRef100_G5EL89										0.0139969
			UniRef100_A0A9N8NQH2										0.00311042
			UniRef100_V5YQM8										0.00155521
			UniRef100_UPI001879DA3C										0.00155521
			NA										NA
UniRef90_C8CGY9	17	cds	UniRef100_C8CGY9	UniRef90_C8CGY9	Single-stranded DNA-binding protein	Single-stranded DNA-binding protein	B	increased in-hospital mortality	86.17% (82.52;89.83)	78.4% (69.9;86.9)	38.7% (21.8;57.8)	0.0482115	0.029549	transcription
			UniRef100_UPI000450992F										0.00622084
			UniRef100_UPI001CC6FA23										0.00466563
			UniRef100_A0A2H4JHI1										0.00311042
			UniRef100_UPI000453673D										0.00155521
			UniRef100_UPI0006BAF9B2										0.00155521
			UniRef100_UPI0013638C0F										0.00155521
UniRef90_A0A1W5ISY9	18	cds	UniRef100_D2JAJ2	UniRef90_A0A1W5ISY9	DNA-binding transcriptional regulator, MarR family	HTH marR-type domain-containing protein	B	increased in-hospital mortality	86.32% (82.68;89.95)	79.22% (70.84;87.59)	40.3% (28.9;52.5)	0.111975	0.0326594	transcription
			UniRef100_A0A141RLI4										0.0139969
			UniRef100_A1KWX8										0.00155521
			NA										NA
UniRef90_Q76LS7	19	cds	UniRef100_Q76LS7	UniRef90_Q76LS7	staphylococcal enterotoxin type J	Enterotoxin J (sej)	B	increased in-hospital mortality	86.35% (82.73;89.97)	78.87% (70.34;87.39)	42.1% (26.3;59.2)	0.059098	0.00155521	superantigen
UniRef90_Q76LS8	19	cds	UniRef100_UPI0015789C3D	UniRef90_Q76LS8	staphylococcal enterotoxin type R	Exotoxin (entG)	B	increased in-hospital mortality	86.35% (82.73;89.97)	78.87% (70.34;87.39)	42.1 %(26.3;59.2)	0.059	0.00155521	superantigen
			NA										0.00155521
UniRef90_D2J5W5	20	cds	UniRef100_D2J5W5	UniRef90_D2J5W5	DUF4238 domain-containing protein	DUF4238 domain-containing protein	B	increased in-hospital mortality	86.39% (82.77;90.01)	78.77% (70.26;87.28)	41.5% (26.3;57.9)	0.0637636	0.0248834	unknown
			UniRef100_D2JBR0										0.0155521
			UniRef100_A0A0A0QZU9										0.00933126
			UniRef100_UPI001C29AFB6										0.00933126
			UniRef100_D2J812										0.00155521
			UniRef100_A0A291R9W2										0.00155521
			NA										NA
UniRef90_A0A133QAV6	21	cds	UniRef100_A0A0T7M3W3	UniRef90_A0A133QAV6	Conjugal transfer protein	Conjugal transfer protein	B	increased in-hospital mortality	86.51% (82.9;90.12)	78.17% (69.58;86.75)	30.8% (24.4;37.8)	0.303266	0.108865	unknown
			UniRef100_A0A0U1MR86										0.105754
			UniRef100_D3W9W2										0.0139969
			UniRef100_UPI0004AD55BB										0.0108865
			UniRef100_UPI000A4CEB33										0.00622084
			UniRef100_A0A6B0DDF3										0.00466563
			UniRef100_UPI00024326CC										0.00311042
			UniRef100_UPI000452D5E4										0.00311042
			UniRef100_UPI0004539A8A										0.00311042
			UniRef100_UPI000F3AA608										0.00311042
			UniRef100_UPI00069AEFC4										0.00155521
			UniRef100_UPI0013BCAF54										0.00155521
			UniRef100_UPI00024F1376										0.00155521
			UniRef100_UPI0001C14BF1										0.00155521
			NA										NA
UniRef90_B2ZYZ9	22	cds	UniRef100_B2ZYZ9	UniRef90_B2ZYZ9	DUF2977 domain-containing protein	DUF2977 domain-containing protein (orf61)	B	increased in-hospital mortality	86.48% (82.86;90.09)	77.66% (68.99;86.34)	32.7% (26.3;39.6)	0.314152	0.0528771	unknown
			UniRef100_A0A0E3XD88										0.0342146
			UniRef100_A0A9N8NUR6										0.0248834
			UniRef100_A0A7Z1SAX7										0.0155521
			UniRef100_UPI0002C9541D										0.0155521
			UniRef100_UPI00044A12A2										0.0139969
			UniRef100_A0A7T1JPY0										0.0108865
			UniRef100_A0A6A8FD54										0.00933126
			UniRef100_W5R9M2										0.00933126
			UniRef100_Q4ZBQ0										0.00777605
			UniRef100_A0A0C6DV20										0.00777605
			UniRef100_A9CRC6										0.00777605
			UniRef100_A0A0E3T8J6										0.00777605
			UniRef100_A0A2C9TTQ8										0.00777605
			UniRef100_A0A6G4QGT0										0.00622084
			UniRef100_UPI00065C1718										0.00622084
			UniRef100_UPI001B9F8075										0.00622084
			UniRef100_UPI00044CD3ED										0.00466563
			UniRef100_A0A9Q7NDS3										0.00311042
			UniRef100_Q4ZBX4										0.00311042
			UniRef100_UPI00044F840D										0.00311042
			UniRef100_UPI0004450B8A										0.00311042
			UniRef100_UPI000247788F										0.00155521
			UniRef100_UPI0001C37DA7										0.00155521
			UniRef100_UPI00021ADFFD										0.00155521
			UniRef100_UPI0001C33BEE										0.00155521
			UniRef100_A0A659ZZX4										0.00155521
			UniRef100_A0A9Q1T6L1										0.00155521
			UniRef100_UPI00044A5ED3										0.00155521
			UniRef100_UPI000452987C										0.00155521
			UniRef100_UPI00044B8B6B										0.00155521
			UniRef100_UPI0004505B84										0.00155521
			UniRef100_UPI0004BBF1B5										0.00155521
			UniRef100_UPI000509AE0D										0.00155521
			UniRef100_UPI0006E62966										0.00155521
			UniRef100_A0A6A8FCX2										0.00155521
			UniRef100_UPI0008DA9D24										0.00155521
			UniRef100_UPI00090B5CF5										0.00155521
			UniRef100_UPI000E3DF8E3										0.00155521
			UniRef100_UPI00228ABC65										0.00155521
			UniRef100_UPI0027C66D9B										0.00155521
			NA										NA
UniRef90_A0A0H3K651	23	cds	UniRef100_A0A0H3K651	UniRef90_A0A0H3K651	Phage protein	Phage protein	B	increased in-hospital mortality	86.49% (82.88;90.1)	76.94% (68.15;85.74)	31.7% (25.3;38.6)	0.314152	0.0808709	unknown
			UniRef100_A0A2W2M8R7										0.0419907
			UniRef100_A0A2I6PCW6										0.0155521
			UniRef100_A0A9Q4MEE9										0.0139969
			UniRef100_A0A7U7JTT1										0.0139969
			UniRef100_A0A5N5IHF5										0.0124417
			UniRef100_A0A6B5F1W8										0.0108865
			UniRef100_Q2FX75										0.00933126
			UniRef100_M9NS69										0.00933126
			UniRef100_A0A0E3T8J8										0.00777605
			UniRef100_A0A7X3FAM0										0.00622084
			UniRef100_S4SWE0										0.00466563
			UniRef100_A0A0U1MGV1										0.00466563
			UniRef100_A0A513ZXU8										0.00466563
			UniRef100_A0A9P3ZD03										0.00466563
			UniRef100_UPI00045036F6										0.00466563
			UniRef100_UPI00066CEF24										0.00466563
			UniRef100_UPI00085C7771										0.00466563
			UniRef100_UPI000247788D										0.00311042
			UniRef100_UPI0002477732										0.00311042
			UniRef100_A0A2C6M3H3										0.00311042
			UniRef100_A9CRD5										0.00311042
			UniRef100_UPI0004521783										0.00311042
			UniRef100_UPI0004452600										0.00311042
			UniRef100_UPI000A84B0CF										0.00311042
			UniRef100_UPI0002ABBCB2										0.00155521
			UniRef100_A0A7Z1MWF6										0.00155521
			UniRef100_B2ZZ04										0.00155521
			UniRef100_A0A9Q4YMR1										0.00155521
			UniRef100_UPI00044D5875										0.00155521
			UniRef100_UPI00045285CB										0.00155521
			UniRef100_UPI0004AEEB14										0.00155521
			UniRef100_UPI0004A9820E										0.00155521
			UniRef100_UPI0021F4F2A5										0.00155521
			UniRef100_UPI000A580C3E										0.00155521
			UniRef100_UPI0027D10C3A										0.00155521
			NA										NA
UniRef90_A0A1D0BP50	24	cds	NA	UniRef90_A0A1D0BP50	Phage protein	Phage protein	B	increased in-hospital mortality	86.54% (82.94;90.14)	77.02% (68.22;85.82)	43.2% (27.1;60.5)	0.0575428	NA	unknown
UniRef90_Q9MBS7	25	cds	UniRef100_Q2FX28	UniRef90_Q9MBS7	Phage protein	Phage protein	B	increased in-hospital mortality	86.51% (82.91;90.11)	77.04% (68.24;85.84)	42.4% (29.6;55.9)	0.0917574	0.0248834	unknown
			UniRef100_A0A9N8NJL8										0.0202177
			UniRef100_A0A2S6D6L6										0.0171073
			UniRef100_A0A380E2N6										0.0139969
			UniRef100_Q9MBS7										0.00777605
			UniRef100_UPI00044DAD00										0.00777605
UniRef90_UPI00210E2771	26	cds	NA	UniRef90_UPI00210E2771	NifU N-terminal domain-containing protein	NifU N-terminal domain-containing protein	B	increased in-hospital mortality	86.56% (82.96;90.15)	76.96% (68.15;85.78)	33.9% (22.1;47.4)	0.0917574	NA	unknown
UniRef90_A0A6A9H1Z5	27	cds	UniRef100_C4TFC8	UniRef90_A0A6A9H1Z5	Transposon-related protein	Transposon-related protein	B	increased in-hospital mortality	86.59% (83;90.18)	76.61% (67.77;85.46)	35.6% (21.9;51.2)	0.0699844	0.0404355	recombination
			UniRef100_A0A6A9H1Z5										0.0248834
			UniRef100_UPI00061BFA86										0.00155521
			UniRef100_A0A7Z7QYD3										0.00155521
			UniRef100_UPI000A885993										0.00155521
UniRef90_B2ZZ00	28	cds	UniRef100_A0A0E3XC53	UniRef90_B2ZZ00	XkdX family protein	XkdX family protein (orf62)	B	increased in-hospital mortality	86.53% (82.94;90.13)	76.83% (68.04;85.61)	31.4% (25.4;37.9)	0.346812	0.0839813	unknown
			UniRef100_A0A0E3T9P4										0.0746501
			UniRef100_A0A9N8NUR8										0.0342146
			UniRef100_A0A0E1XB01										0.0248834
			UniRef100_S4V689										0.0124417
			UniRef100_A0A853PA73										0.00933126
			UniRef100_A0A0M2NXS7										0.00311042
			NA										NA
UniRef90_B2ZYW0	29	cds	UniRef100_C8CGZ5	UniRef90_B2ZYW0	Phi ETA-like protein	Phi ETA-like protein (orf22)	B	increased in-hospital mortality	86.55% (82.96;90.15)	76.79% (68.02;85.56)	35% (27.6;42.9)	0.248834	0.0979782	unknown
			UniRef100_B2ZYW0										0.0326594
			UniRef100_A0A9Q1TAR5										0.0217729
			UniRef100_A0A517IV58										0.0155521
			UniRef100_A0A098GYX8										0.00933126
			UniRef100_UPI001231F879										0.00933126
			UniRef100_A0A9N8I5R3										0.00933126
			UniRef100_A0A850G7C2										0.00933126
			UniRef100_A0A517JNF7										0.00777605
			UniRef100_A0A7U7PXX0										0.00466563
			UniRef100_Q4ZBL4										0.00311042
			UniRef100_A0A317ZEH0										0.00311042
			UniRef100_UPI0002C9A1D2										0.00311042
			UniRef100_UPI0004B7C33B										0.00311042
			UniRef100_A0A6G4JK85										0.00311042
			UniRef100_UPI0001B3ADCB										0.00155521
			UniRef100_A0A9Y1DJN7										0.00155521
			UniRef100_UPI0001B3B3D6										0.00155521
			UniRef100_UPI00045A3BAD										0.00155521
			UniRef100_UPI000851C31C										0.00155521
			UniRef100_UPI000D15469B										0.00155521
			UniRef100_UPI00139CCC30										0.00155521
			UniRef100_UPI0013DA8517										0.00155521
			UniRef100_UPI0013FA3EFB										0.00155521
			UniRef100_UPI0005C25347										0.00155521
			UniRef100_UPI000699D05E										0.00155521
			UniRef100_UPI000806DB61										0.00155521
			UniRef100_UPI00085C38B3										0.00155521
			UniRef100_UPI000B0ED08E										0.00155521
			UniRef100_UPI000C9B830A										0.00155521
			UniRef100_UPI000A655461										0.00155521
			UniRef100_UPI0022EBC454										0.00155521
UniRef90_A0A2U0IJN8	30	cds	UniRef100_A0A9Q4MD06	UniRef90_A0A2U0IJN8	TIGR01741 family protein	TIGR01741 family protein	B	increased in-hospital mortality	86.64% (83.06;90.21)	76.59% (67.75;85.43)	30.8% (23.1;39.4)	0.206843	0.102644	genome editing
			UniRef100_A0A2U0IJN8										0.0870918
			UniRef100_A0A6A9GSE6										0.0124417
			UniRef100_UPI0002423DEC										0.00311042
			UniRef100_UPI00024C351D										0.00155521
UniRef90_U5U4Q5	31	cds	UniRef100_U5U4Q5	UniRef90_U5U4Q5	DUF2951 domain-containing protein	DUF2951 domain-containing protein	B	increased in-hospital mortality	86.69% (83.12;90.27)	76.63% (67.8;85.46)	31.7% (25.9;37.9)	0.377916	0.255054	unknown
			UniRef100_A0A0F6N3M6										0.0528771
			UniRef100_A0A2U0IJ94										0.037325
			UniRef100_A0A6B0CUI8										0.0202177
			UniRef100_A0A8G2I364										0.00933126
			UniRef100_A0A2I6PDF4										0.00777605
			UniRef100_UPI0002CA8A46										0.00622084
			UniRef100_UPI0004482DC0										0.00311042
			UniRef100_A0A7Z8C304										0.00155521
			UniRef100_UPI00044AC6BD										0.00155521
			UniRef100_UPI000445800E										0.00155521
			UniRef100_A0A6A8FCY5										0.00155521
			NA										NA
UniRef90_D2J5Y0	33	cds	UniRef100_D2J5Y0	UniRef90_D2J5Y0	hypothetical protein	Uncharacterized protein	B	increased in-hospital mortality	86.65% (83.08;90.23)	76.59% (67.78;85.41)	31.6% (22.6;41.8)	0.152411	0.0762053	unknown
			UniRef100_UPI00045043B3										0.0497667
			UniRef100_UPI0020BF0AF9										0.00155521
			NA										NA
UniRef90_E4PYM2	33	cds	UniRef100_A0A499S1X7	UniRef90_E4PYM2	hypothetical protein	Uncharacterized protein	B	increased in-hospital mortality	86.65% (83.08;90.23)	76.59% (67.78;85.41)	31.6% (22.6;41.8)	0.152411	0.0948678	unknown
			NA										0.0575428
UniRef90_A0A0E1XGG4	35	cds	UniRef100_A0A0E1XGG4	UniRef90_A0A0E1XGG4	IS30 family ISSau5 transposase ORF A	Transposase	B	increased in-hospital mortality	86.67% (83.1;90.24)	76.46% (67.62;85.29)	30.1% (23.4;37.5)	0.273717	0.169518	recombination
			UniRef100_A0A0E8HLR7										0.0839813
			UniRef100_A0A0Y9Z2Y8										0.0155521
			UniRef100_A0A7Z7W1C2										0.00155521
			UniRef100_UPI0001BAF7B4										0.00155521
			UniRef100_A0A6M1XRT0										0.00155521
UniRef90_A0A0H2VE41	36	cds	UniRef100_B9V2B2	UniRef90_A0A0H2VE41	Pyridoxal phosphate-dependent enzyme	Pyridoxal phosphate-dependent enzyme	B	increased in-hospital mortality	86.65% (83.08;90.23)	76.46% (67.6;85.31)	56.7% (37.4;74.5)	0.0466563	0.0279938	unknown
			UniRef100_A0A6C0L714										0.0155521
			UniRef100_M1XJQ0										0.00155521
			UniRef100_UPI0018797D25										0.00155521
UniRef90_Q1XG20	37	cds	UniRef100_D2JAJ1	UniRef90_Q1XG20	NADPH:quinone reductase or related Zn-dependent oxidoreductase	Acryloyl-CoA reductase (SAP008)	B	increased in-hospital mortality	86.64% (83.06;90.21)	76.5% (67.65;85.34)	40% (28.5;52.4)	0.108865	0.0342146	detoxification
			UniRef100_D2J5X1										0.029549
			UniRef100_D2JBQ5										0.0264386
			UniRef100_Q1XG20										0.0124417
			UniRef100_UPI000B2546C4										0.00311042
			UniRef100_A1KWX9										0.00155521
			UniRef100_A0A0U1MSU5										0.00155521
