# Supplementary material
Source: Research Square preprint supplement (doi:10.21203/rs.3.rs-9449451/v1)
Supplement: Supplementary file 5 [file d9beee18e197aaedd80f4be6.xlsx]

## Sheet: result
Trait	g+t+	g+t-	g-t+	g-t-	sensitivity	specificity	odds_ratio	fisher_p	fisher_q	empirical_p	fq*ep	contrasting	supporting	opposing	best	worst
UniRef100_A0A6C0L8I7	16	12	99	353	13.913	96.7123	4.75421	0.000103159	1	0.00039996	0.00039996	12	11	6	0.00634766	1
UniRef100_Q99VY2	90	321	25	44	21.7391	87.9452	0.493458	0.0141777	1	0.00049995	0.00049995	15	6	11	0.118469	0.607239
UniRef100_UPI0013C5277B	1	27	114	338	99.1304	7.39726	0.109812	0.00561244	1	0.00519948	0.00519948	13	1	12	0.00341797	0.00341797
UniRef100_A0A517IVA3	1	25	114	340	99.1304	6.84932	0.119298	0.00903554	1	0.00789921	0.00789921	13	1	12	0.00341797	0.00341797
UniRef100_A7X1P3	23	42	92	323	20	88.4932	1.92262	0.0278716	1	0.0106989	0.0106989	12	12	5	0.000488281	0.774414
UniRef100_UPI0002CA386D	16	23	99	342	13.913	93.6986	2.40316	0.0171169	1	0.0146985	0.0146985	10	9	3	0.0214844	0.34375
UniRef100_A0A658X0A3	12	15	103	350	10.4348	95.8904	2.71845	0.0179341	1	0.0206979	0.0206979	17	9	9	1	1
UniRef100_Q93PN3	64	162	51	203	55.6522	55.6164	1.5725	0.0416522	1	0.0338966	0.0338966	16	16	3	3.05176e-05	0.0212708
UniRef100_A0A0E0VLV9	19	102	96	263	83.4783	27.9452	0.510315	0.0138111	1	0.0342966	0.0342966	8	3	7	0.0703125	0.726562
UniRef100_A0A0D1JN68	44	102	71	263	38.2609	72.0548	1.5979	0.047747	1	0.050495	0.050495	15	13	8	0.00738525	1
UniRef100_Q2FXR3	99	280	16	85	86.087	23.2877	1.87835	0.035504	1	0.0561944	0.0561944	16	15	3	0.000518799	0.0212708
UniRef100_Q2G0K7	50	111	65	254	43.4783	69.589	1.76022	0.0125205	1	0.0583942	0.0583942	12	11	5	0.00634766	0.774414
UniRef100_A0A0E0VRF1	2	27	113	338	98.2609	7.39726	0.221567	0.0243838	1	0.0583942	0.0583942	3	1	3	0.25	1
UniRef100_W8UXA3	58	141	57	224	50.4348	61.3699	1.61652	0.0298316	1	0.0675932	0.0675932	21	18	8	0.00148964	0.38331
UniRef100_D2J5X2	13	18	102	347	11.3043	95.0685	2.45697	0.0269735	1	0.0961904	0.0961904	15	9	8	0.607239	1
UniRef100_A0A2S6D6Q7	3	31	112	334	97.3913	8.49315	0.288594	0.0356237	1	0.0971903	0.0971903	6	1	6	0.03125	0.21875
UniRef100_A0A9Q4V4N4	15	21	100	344	13.0435	94.2466	2.45714	0.0141778	1	0.10039	0.10039	7	7	4	0.015625	1
UniRef100_D2J5X3	12	15	103	350	10.4348	95.8904	2.71845	0.0179341	1	0.105689	0.105689	13	8	6	0.581055	1
UniRef100_D2J5W1	12	14	103	351	10.4348	96.1644	2.92094	0.0154159	1	0.115988	0.115988	13	8	6	0.581055	1
UniRef100_X5EHN8	54	122	61	243	46.9565	66.5753	1.76324	0.0106078	1	0.117188	0.117188	12	12	3	0.000488281	0.145996
UniRef100_T1Y9A8	92	245	23	120	80	32.8767	1.95918	0.00986099	1	0.117888	0.117888	15	14	4	0.000976562	0.118469
UniRef100_D2J5X0	12	15	103	350	10.4348	95.8904	2.71845	0.0179341	1	0.118588	0.118588	15	9	7	0.607239	1
UniRef100_W8U5T5	79	204	36	161	68.6957	44.1096	1.73189	0.01672	1	0.119488	0.119488	20	17	6	0.00257683	0.115318
UniRef100_A7X1H4	67	172	48	193	58.2609	52.8767	1.56625	0.0422156	1	0.132687	0.132687	17	14	9	0.0127258	1
UniRef100_A0A0E0VQN1	15	82	100	283	86.9565	22.4658	0.517683	0.0326445	1	0.139186	0.139186	6	6	4	0.03125	0.6875
UniRef100_A0A0U1MTM9	4	40	111	325	96.5217	10.9589	0.292793	0.0150424	1	0.144386	0.144386	9	4	6	0.507812	1
UniRef100_Q99RL9	84	223	31	142	73.0435	38.9041	1.72544	0.0197982	1	0.175182	0.175182	10	9	4	0.0214844	0.753906
UniRef100_A0A9Q4UZ40	14	20	101	345	12.1739	94.5205	2.39109	0.0209343	1	0.176082	0.176082	6	6	3	0.03125	1
UniRef100_D2J5W0	12	16	103	349	10.4348	95.6164	2.54126	0.0219662	1	0.187281	0.187281	14	8	7	0.790527	1
UniRef100_Q8VVU3	12	16	103	349	10.4348	95.6164	2.54126	0.0219662	1	0.187281	0.187281	14	8	7	0.790527	1
UniRef100_D2J5W8	12	16	103	349	10.4348	95.6164	2.54126	0.0219662	1	0.187281	0.187281	14	8	7	0.790527	1
UniRef100_O85217	12	16	103	349	10.4348	95.6164	2.54126	0.0219662	1	0.187281	0.187281	14	8	7	0.790527	1
UniRef100_D2J5Z4	12	16	103	349	10.4348	95.6164	2.54126	0.0219662	1	0.187281	0.187281	14	8	7	0.790527	1
UniRef100_D2J5Y9	12	16	103	349	10.4348	95.6164	2.54126	0.0219662	1	0.187281	0.187281	14	8	7	0.790527	1
UniRef100_W8TTH4	63	157	52	208	54.7826	56.9863	1.6051	0.0317763	1	0.192181	0.192181	16	14	5	0.00418091	0.210114
UniRef100_W8TUA8	96	263	19	102	83.4783	27.9452	1.95958	0.0138111	1	0.20198	0.20198	28	24	6	0.000179991	0.00371917
UniRef100_A0A090LYE4	22	110	93	255	80.8696	30.137	0.548387	0.0228069	1	0.206779	0.206779	8	5	6	0.289062	0.726562
UniRef100_A0A0E0VMP6	3	33	112	332	97.3913	9.0411	0.269481	0.0239999	1	0.213479	0.213479	8	3	7	0.0703125	0.726562
UniRef100_A0A0U1MTN8	5	41	110	324	95.6522	11.2329	0.359202	0.028958	1	0.220378	0.220378	4	3	4	0.125	0.625
UniRef100_A7X2H3	99	281	16	84	86.087	23.0137	1.84964	0.0358937	1	0.224478	0.224478	10	10	3	0.00195312	0.34375
UniRef100_A0A9P1QL98	30	60	85	305	26.087	83.5616	1.79412	0.02782	1	0.226377	0.226377	12	9	7	0.145996	0.774414
UniRef100_A0A2R4A9A6	21	35	94	330	18.2609	90.411	2.10638	0.0186035	1	0.233877	0.233877	19	11	10	0.647606	1
UniRef100_A7X388	39	79	76	286	33.913	78.3562	1.85776	0.00920327	1	0.259874	0.259874	8	8	4	0.0078125	1
UniRef100_A0A133PU93	92	250	23	115	80	31.5068	1.84	0.0181541	1	0.262674	0.262674	16	14	4	0.00418091	0.0768127
UniRef100_W8UVY3	110	322	5	43	95.6522	11.7808	2.93789	0.0199815	1	0.271673	0.271673	13	12	2	0.00341797	0.0224609
UniRef100_Q99SA3	59	142	56	223	51.3043	61.0959	1.65455	0.0226985	1	0.288671	0.288671	25	21	7	0.000910521	0.0432853
UniRef100_A0A2X3WAT2	48	111	67	254	41.7391	69.589	1.63937	0.0306205	1	0.339366	0.339366	8	7	5	0.0703125	0.726562
UniRef100_T1Y821	27	55	88	310	23.4783	84.9315	1.72934	0.0461424	1	0.348965	0.348965	6	6	4	0.03125	0.6875
UniRef100_W8U2Z7	55	133	60	232	47.8261	63.5616	1.599	0.0371197	1	0.353765	0.353765	12	11	3	0.00634766	0.145996
UniRef100_A0A0E0VRX2	14	80	101	285	87.8261	21.9178	0.493812	0.0219845	1	0.355964	0.355964	24	11	17	0.0639147	0.83882
UniRef100_Q2FJ80	92	250	23	115	80	31.5068	1.84	0.0181541	1	0.409559	0.409559	11	10	6	0.0117188	1
UniRef100_A0A2S6DFD5	2	27	113	338	98.2609	7.39726	0.221567	0.0243838	1	0.420358	0.420358	2	1	2	0.5	1
UniRef100_A0A9Q8H2H2	66	166	49	199	57.3913	54.5205	1.6147	0.0321231	1	0.445955	0.445955	7	7	3	0.015625	1
UniRef100_A0A0D6GEK5	49	113	66	252	42.6087	69.0411	1.65567	0.0238969	1	0.463954	0.463954	6	6	5	0.03125	0.21875
UniRef100_W8TRM3	52	120	63	245	45.2174	67.1233	1.68519	0.0191303	1	0.472953	0.472953	7	7	4	0.015625	1
UniRef100_W8UTL6	92	253	23	112	80	30.6849	1.77075	0.0319043	1	0.478152	0.478152	23	19	7	0.00259948	0.0931396
UniRef100_V5YRT8	46	104	69	261	40	71.5068	1.67308	0.0280187	1	0.510349	0.510349	8	7	6	0.0703125	0.289062
UniRef100_A7X350	97	275	18	90	84.3478	24.6575	1.76364	0.0541854	1	0.521648	0.521648	12	10	5	0.0385742	0.774414
UniRef100_A6U4X7	76	189	39	176	66.087	48.2192	1.81468	0.00729943	1	0.581342	0.581342	11	9	7	0.0654297	0.548828
UniRef100_Q2FIJ2	52	119	63	246	45.2174	67.3973	1.70628	0.0187579	1	0.594241	0.594241	13	11	5	0.0224609	0.581055
UniRef100_A0A3M7WI19	42	94	73	271	36.5217	74.2466	1.6587	0.0323509	1	0.60044	0.60044	7	6	6	0.125	0.125
UniRef100_A6U0P1	37	82	78	283	32.1739	77.5342	1.63712	0.0470165	1	0.622238	0.622238	9	7	6	0.179688	0.507812
UniRef100_A0A1D4BGR3	31	137	84	228	73.0435	37.5342	0.614181	0.0435132	1	0.644236	0.644236	8	5	7	0.0703125	0.726562
UniRef100_W8TRN2	60	150	55	215	52.1739	58.9041	1.56364	0.0407796	1	0.679532	0.679532	11	9	8	0.0654297	0.226562
UniRef100_P68799	38	83	77	282	33.0435	77.2603	1.67673	0.0357996	1	0.721828	0.721828	6	5	4	0.21875	0.6875
UniRef100_A0A0S2J5S7	34	152	81	213	70.4348	41.6438	0.588207	0.0213844	1	0.827917	0.827917	10	7	7	0.34375	0.34375
UniRef100_A0A0E0VS49	18	90	97	275	84.3478	24.6575	0.56701	0.0541854	1	0.838716	0.838716	7	5	5	0.453125	0.453125
UniRef100_E4PYM0	30	59	85	306	26.087	83.8356	1.83051	0.0196698	1	0.867213	0.867213	37	19	22	0.324009	1
UniRef100_A0A090LQF4	28	132	87	233	75.6522	36.1644	0.568095	0.0230066	1	0.931507	0.931507	10	7	7	0.34375	0.34375
UniRef100_A0A0U1MPD4	7	50	108	315	93.913	13.6986	0.408333	0.0308428	1	0.933707	0.933707	4	3	3	0.625	0.625
UniRef100_B2ZYZ2	13	18	102	347	11.3043	95.0685	2.45697	0.0269735	1	0.948405	0.948405	27	11	17	0.247789	0.442068
UniRef100_A0A0C2HX83	27	133	88	232	76.5217	36.4384	0.535202	0.0123308	1	0.964204	0.964204	16	10	9	0.454498	0.803619
UniRef100_A0A4U2KP01	12	16	103	349	10.4348	95.6164	2.54126	0.0219662	1	0.980202	0.980202	19	10	11	0.647606	1
UniRef100_C4TFC1	19	31	96	334	16.5217	91.5068	2.13239	0.021632	1	0.981402	0.981402	40	18	25	0.15386	0.635828
UniRef100_O80068	27	44	88	321	23.4783	87.9452	2.23838	0.00400951	1	0.990301	0.990301	41	22	24	0.348889	0.755229
UniRef100_A0A7U7EV04	26	43	89	322	22.6087	88.2192	2.18761	0.00581282	1	0.995	0.995	42	22	23	0.643969	0.877614
UniRef100_B6V395	38	66	77	299	33.0435	81.9178	2.23573	0.00109991	1	0.9967	0.9967	52	29	30	0.33175	0.488456
UniRef100_Q2FES9	23	63	92	302	20	82.7397	1.19841	0.489218	1	0.00039996	0.00039996	6	2	6	0.03125	0.6875
UniRef100_UPI000E3E34EC	5	0	110	365	4.34783	100	inf	0.000738061	1	0.00089991	0.00089991	5	5	0	0.0625	0.0625
UniRef100_A7WXP7	56	190	59	175	51.3043	52.0548	0.874219	0.592898	1	0.00179982	0.00179982	17	11	15	0.00234985	0.332306
UniRef100_A0A641AAD3	38	116	77	249	33.0435	68.2192	1.05934	0.819297	1	0.00209979	0.00209979	8	4	8	0.0078125	1
UniRef100_W8TRF0	77	226	38	139	66.9565	38.0822	1.24627	0.375562	1	0.00219978	0.00219978	24	24	6	1.19209e-07	0.0226558
UniRef100_A7X524	92	278	23	87	80	23.8356	1.2518	0.446217	1	0.00229977	0.00229977	22	22	4	4.76837e-07	0.00434351
UniRef100_D3W9V7	6	2	109	363	5.21739	99.4521	9.99083	0.0030876	1	0.00259974	0.00259974	8	6	2	0.289062	0.289062
UniRef100_A0A0E1X8N6	16	60	99	305	86.087	16.4384	0.821549	0.561271	1	0.00259974	0.00259974	27	11	24	4.92334e-05	0.442068
UniRef100_T1Y5Q1	30	112	85	253	73.913	30.6849	0.797269	0.412232	1	0.00269973	0.00269973	8	4	8	0.0078125	1
UniRef100_A0A6B3ING4	8	5	107	360	6.95652	98.6301	5.38318	0.00376302	1	0.00279972	0.00279972	9	7	3	0.179688	0.507812
UniRef100_D3W9W2	5	1	110	364	4.34783	99.726	16.5455	0.00357377	1	0.00319968	0.00319968	6	5	1	0.21875	0.21875
UniRef100_A0A8G2I1F7	6	2	109	363	5.21739	99.4521	9.99083	0.0030876	1	0.00359964	0.00359964	8	6	2	0.289062	0.289062
UniRef100_A0A9N8NJL8	8	5	107	360	6.95652	98.6301	5.38318	0.00376302	1	0.00359964	0.00359964	12	8	5	0.387695	0.774414
UniRef100_Q2FXC8	6	12	109	353	5.21739	96.7123	1.61927	0.397103	1	0.00369963	0.00369963	7	6	4	0.125	1
UniRef100_A6QGC0	42	126	73	239	36.5217	65.4795	1.09132	0.736928	1	0.00369963	0.00369963	23	10	16	0.0931396	0.677639
UniRef100_A0FIM1	6	27	109	338	94.7826	7.39726	0.689093	0.528618	1	0.00409959	0.00409959	13	4	12	0.00341797	0.266846
UniRef100_Q6GG85	9	36	106	329	92.1739	9.86301	0.775943	0.58607	1	0.00429957	0.00429957	7	2	6	0.125	0.453125
UniRef100_A0A9Q4MAD3	13	41	102	324	11.3043	88.7671	1.00717	1	1	0.00429957	0.00429957	7	3	6	0.125	1
UniRef100_B9V2B2	10	5	105	360	8.69565	98.6301	6.85714	0.000442247	1	0.00439956	0.00439956	7	7	2	0.015625	0.453125
UniRef100_B9V2B4	10	5	105	360	8.69565	98.6301	6.85714	0.000442247	1	0.00439956	0.00439956	7	7	2	0.015625	0.453125
UniRef100_E9KNP8	10	5	105	360	8.69565	98.6301	6.85714	0.000442247	1	0.00439956	0.00439956	7	7	2	0.015625	0.453125
UniRef100_A0A9X9JZU0	4	0	111	365	3.47826	100	inf	0.00316502	1	0.00439956	0.00439956	4	4	0	0.125	0.125
UniRef100_UPI002572E4CA	4	0	111	365	3.47826	100	inf	0.00316502	1	0.00439956	0.00439956	4	4	0	0.125	0.125
UniRef100_A0A2U0IJ94	10	7	105	358	8.69565	98.0822	4.87075	0.00182111	1	0.00449955	0.00449955	15	9	7	0.607239	1
UniRef100_A0A389NUI4	40	123	75	242	34.7826	66.3014	1.04932	0.822397	1	0.00459954	0.00459954	15	9	12	0.0351562	0.607239
UniRef100_Q5HGK3	38	118	77	247	33.0435	67.6712	1.03302	0.909338	1	0.0049995	0.0049995	10	5	9	0.0214844	1
UniRef100_A0A090LR26	24	99	91	266	79.1304	27.1233	0.708625	0.220462	1	0.00509949	0.00509949	7	3	7	0.015625	1
UniRef100_A0A0E0VNG6	24	89	91	276	79.1304	24.3836	0.817879	0.528641	1	0.00509949	0.00509949	12	7	12	0.000488281	0.774414
UniRef100_A0A7D5TAY0	19	64	96	301	83.4783	17.5342	0.930827	0.887947	1	0.00519948	0.00519948	13	7	12	0.00341797	1
UniRef100_A0A0D1HW72	35	131	80	234	69.5652	35.8904	0.781489	0.312584	1	0.00549945	0.00549945	14	7	14	0.00012207	1
UniRef100_U5U449	8	6	107	359	6.95652	98.3562	4.47352	0.00702546	1	0.00559944	0.00559944	10	7	4	0.34375	0.753906
UniRef100_Q6G723	53	155	62	210	46.087	57.5342	1.15817	0.518372	1	0.0059994	0.0059994	19	18	9	7.62939e-05	1
UniRef100_A0A659ICB2	44	108	71	257	38.2609	70.411	1.4747	0.0857009	1	0.00609939	0.00609939	19	19	4	3.8147e-06	0.0192108
UniRef100_A7X154	37	122	78	243	67.8261	33.4247	0.94483	0.82143	1	0.00619938	0.00619938	13	9	11	0.0224609	0.266846
UniRef100_A0A9Q4V4G5	21	51	94	314	18.2609	86.0274	1.37547	0.294325	1	0.00659934	0.00659934	8	4	7	0.0703125	1
UniRef100_A0A0D3Q7F1	25	63	90	302	21.7391	82.7397	1.33157	0.272757	1	0.0069993	0.0069993	4	2	4	0.125	1
UniRef100_C8CGY8	14	39	101	326	12.1739	89.3151	1.15867	0.732895	1	0.00729927	0.00729927	35	12	33	3.6729e-08	0.0895311
UniRef100_A0A7H9CBC0	15	22	100	343	13.0435	93.9726	2.33864	0.0253072	1	0.00749925	0.00749925	23	13	13	0.677639	0.677639
UniRef100_A0A133Q7M5	14	29	101	336	12.1739	92.0548	1.60601	0.189529	1	0.00779922	0.00779922	12	10	5	0.0385742	0.774414
UniRef100_Q2FIC3	35	119	80	246	69.5652	32.6027	0.904412	0.731466	1	0.00859914	0.00859914	16	9	12	0.0768127	0.803619
UniRef100_A0A0H2VFM6	8	4	107	361	6.95652	98.9041	6.74766	0.00180975	1	0.0089991	0.0089991	6	6	1	0.03125	0.21875
UniRef100_A0A7U7EZY2	18	60	97	305	84.3478	16.4384	0.943299	0.88591	1	0.00939906	0.00939906	11	5	10	0.0117188	1
UniRef100_A7X2I1	93	289	22	76	80.8696	20.8219	1.11167	0.791042	1	0.00949905	0.00949905	27	26	4	4.17233e-07	0.000310749
UniRef100_A0A0D1HT13	67	216	48	149	41.7391	59.1781	0.962867	0.913527	1	0.00949905	0.00949905	11	7	9	0.0654297	0.548828
UniRef100_A0A9Q7Y8E0	8	8	107	357	6.95652	97.8082	3.33645	0.030836	1	0.00959904	0.00959904	7	6	3	0.125	1
UniRef100_Q7BGA5	75	244	40	121	34.7826	66.8493	0.929816	0.735706	1	0.00969903	0.00969903	23	22	5	5.72205e-06	0.010622
UniRef100_Q6GI10	11	36	104	329	90.4348	9.86301	0.966613	1	1	0.00979902	0.00979902	4	2	4	0.125	1
UniRef100_E9KNQ1	9	5	106	360	7.82609	98.6301	6.11321	0.0013162	1	0.00989901	0.00989901	6	6	2	0.03125	0.6875
UniRef100_E9KNQ5	9	5	106	360	7.82609	98.6301	6.11321	0.0013162	1	0.00989901	0.00989901	6	6	2	0.03125	0.6875
UniRef100_E9KNQ3	9	5	106	360	7.82609	98.6301	6.11321	0.0013162	1	0.00989901	0.00989901	6	6	2	0.03125	0.6875
UniRef100_A0A9Q2TWH2	14	41	101	324	12.1739	88.7671	1.09539	0.740303	1	0.009999	0.009999	8	3	6	0.289062	0.726562
UniRef100_A0A2S6D4M5	10	54	105	311	91.3043	14.7945	0.548501	0.115185	1	0.010099	0.010099	9	4	8	0.0390625	1
UniRef100_Q6GFX6	33	111	82	254	71.3043	30.411	0.920897	0.815602	1	0.0105989	0.0105989	11	5	9	0.0654297	1
UniRef100_A0A9Q3MVE5	3	27	112	338	97.3913	7.39726	0.335317	0.0766381	1	0.0107989	0.0107989	5	1	5	0.0625	0.375
UniRef100_A0A9Q7Y2L7	8	31	107	334	93.0435	8.49315	0.805547	0.698262	1	0.0108989	0.0108989	6	3	6	0.03125	1
UniRef100_A7X5G1	108	360	7	5	6.08696	98.6301	0.214286	0.010274	1	0.0114989	0.0114989	6	2	5	0.21875	0.6875
UniRef100_T1Y598	27	75	88	290	23.4783	79.4521	1.18636	0.514746	1	0.0114989	0.0114989	10	7	9	0.0214844	0.34375
UniRef100_A0A0H3JXB2	11	54	104	311	90.4348	14.7945	0.609152	0.163473	1	0.0116988	0.0116988	10	5	8	0.109375	1
UniRef100_A0A0E0VSD5	15	66	100	299	86.9565	18.0822	0.679545	0.253542	1	0.0117988	0.0117988	7	3	6	0.125	1
UniRef100_A0A6B0C8H5	5	2	110	363	4.34783	99.4521	8.25	0.0101067	1	0.0124988	0.0124988	7	5	2	0.453125	0.453125
UniRef100_Q4ZAE2	4	1	111	364	3.47826	99.726	13.1171	0.0128728	1	0.0124988	0.0124988	5	4	1	0.375	0.375
UniRef100_A0A7Z7QXX9	10	36	105	329	91.3043	9.86301	0.87037	0.85618	1	0.0124988	0.0124988	6	2	5	0.21875	0.6875
UniRef100_X5EH11	7	27	108	338	93.913	7.39726	0.811385	0.834922	1	0.0125987	0.0125987	5	2	5	0.0625	1
UniRef100_P41972	10	36	105	329	91.3043	9.86301	0.87037	0.85618	1	0.0125987	0.0125987	6	2	5	0.21875	0.6875
UniRef100_W8U5F9	35	116	80	249	69.5652	31.7808	0.939116	0.818752	1	0.0126987	0.0126987	15	11	12	0.0351562	0.118469
UniRef100_A0A2Z4WRP6	3	0	112	365	2.6087	100	inf	0.0134796	1	0.0127987	0.0127987	3	3	0	0.25	0.25
UniRef100_A0A2X2KUP7	3	0	112	365	2.6087	100	inf	0.0134796	1	0.0127987	0.0127987	3	3	0	0.25	0.25
UniRef100_A0A9Q8M3D9	4	1	111	364	3.47826	99.726	13.1171	0.0128728	1	0.0129987	0.0129987	5	4	1	0.375	0.375
UniRef100_A0A0H3KEF1	19	63	96	302	83.4783	17.2603	0.948743	1	1	0.0131987	0.0131987	8	3	7	0.0703125	0.726562
UniRef100_A0A0D6GSW5	9	40	106	325	92.1739	10.9589	0.689858	0.38161	1	0.0132987	0.0132987	8	4	8	0.0078125	1
UniRef100_A0A0E1VNH2	9	44	106	321	92.1739	12.0548	0.619425	0.235799	1	0.0133987	0.0133987	4	1	4	0.125	0.625
UniRef100_UPI000450F02F	4	1	111	364	3.47826	99.726	13.1171	0.0128728	1	0.0134987	0.0134987	5	4	1	0.375	0.375
UniRef100_UPI000452C247	4	1	111	364	3.47826	99.726	13.1171	0.0128728	1	0.0134987	0.0134987	5	4	1	0.375	0.375
UniRef100_UPI00044D7F4F	4	1	111	364	3.47826	99.726	13.1171	0.0128728	1	0.0134987	0.0134987	5	4	1	0.375	0.375
UniRef100_UPI00044B3D9E	4	1	111	364	3.47826	99.726	13.1171	0.0128728	1	0.0134987	0.0134987	5	4	1	0.375	0.375
UniRef100_UPI0004477D33	4	1	111	364	3.47826	99.726	13.1171	0.0128728	1	0.0134987	0.0134987	5	4	1	0.375	0.375
UniRef100_A0A9P2YVE8	4	1	111	364	3.47826	99.726	13.1171	0.0128728	1	0.0134987	0.0134987	5	4	1	0.375	0.375
UniRef100_A0A8G2I284	3	0	112	365	2.6087	100	inf	0.0134796	1	0.0134987	0.0134987	3	3	0	0.25	0.25
UniRef100_A0A0D6H766	6	20	109	345	94.7826	5.47945	0.949541	1	1	0.0134987	0.0134987	7	3	6	0.125	1
UniRef100_A0A3A3B0X4	10	31	105	334	8.69565	91.5068	1.02611	1	1	0.0135986	0.0135986	4	1	4	0.125	0.625
UniRef100_A0A131JTR6	9	31	106	334	92.1739	8.49315	0.91479	1	1	0.0135986	0.0135986	4	2	4	0.125	1
UniRef100_A0A0E1X7P5	7	7	108	358	6.08696	98.0822	3.31481	0.0490478	1	0.0136986	0.0136986	7	6	2	0.125	0.453125
UniRef100_UPI0012C840B3	3	3	112	362	2.6087	99.1781	3.23214	0.152027	1	0.0139986	0.0139986	3	3	1	0.25	1
UniRef100_A9CRE0	6	2	109	363	5.21739	99.4521	9.99083	0.0030876	1	0.0140986	0.0140986	7	5	2	0.453125	0.453125
UniRef100_R9QT83	10	29	105	336	8.69565	92.0548	1.10345	0.844979	1	0.0142986	0.0142986	12	4	11	0.00634766	0.387695
UniRef100_A0A0U1MM09	11	59	104	306	90.4348	16.1644	0.548566	0.0953571	1	0.0145985	0.0145985	4	1	4	0.125	0.625
UniRef100_A0A659IAL6	6	11	109	354	5.21739	96.9863	1.77148	0.257364	1	0.0155984	0.0155984	7	6	4	0.125	1
UniRef100_X5E4F8	59	176	56	189	51.3043	51.7808	1.13139	0.593651	1	0.0155984	0.0155984	19	17	8	0.000728607	0.647606
UniRef100_A8Z4F6	6	19	109	346	5.21739	94.7945	1.00241	1	1	0.0155984	0.0155984	3	1	3	0.25	1
UniRef100_UPI00044FCE51	6	2	109	363	5.21739	99.4521	9.99083	0.0030876	1	0.0156984	0.0156984	7	5	2	0.453125	0.453125
UniRef100_A0A6K3NSJ0	36	117	79	248	68.6957	32.0548	0.96592	0.909142	1	0.0156984	0.0156984	11	6	10	0.0117188	1
UniRef100_A7X1L8	67	211	48	154	58.2609	42.1918	1.01876	1	1	0.0156984	0.0156984	23	22	6	5.72205e-06	0.0346897
UniRef100_Q70MC8	27	100	88	265	76.5217	27.3973	0.813068	0.467452	1	0.0157984	0.0157984	14	9	11	0.057373	0.42395
UniRef100_A0A0D6HJB1	21	58	94	307	18.2609	84.1096	1.1825	0.565191	1	0.0157984	0.0157984	9	5	7	0.179688	1
UniRef100_A0A0E1VVL4	9	43	106	322	92.1739	11.7808	0.635805	0.301907	1	0.0163984	0.0163984	4	1	4	0.125	0.625
UniRef100_A7X3F0	92	314	23	51	20	86.0274	0.649682	0.138234	1	0.0167983	0.0167983	10	6	8	0.109375	0.753906
UniRef100_A7X149	51	169	64	196	55.6522	46.3014	0.924186	0.748149	1	0.0167983	0.0167983	14	9	11	0.057373	0.42395
UniRef100_Q6GH26	10	35	105	330	91.3043	9.58904	0.897959	0.856189	1	0.0169983	0.0169983	6	3	5	0.21875	1
UniRef100_A7X295	26	84	89	281	77.3913	23.0137	0.977261	1	1	0.0170983	0.0170983	16	9	11	0.210114	0.803619
UniRef100_A6U3Z2	61	182	54	183	53.0435	50.137	1.13584	0.593373	1	0.0172983	0.0172983	17	9	11	0.332306	1
UniRef100_A0A0E1VPQ1	9	44	106	321	92.1739	12.0548	0.619425	0.235799	1	0.0175982	0.0175982	4	1	4	0.125	0.625
UniRef100_A0A0B4ND04	50	155	65	210	43.4783	57.5342	1.04218	0.913971	1	0.0175982	0.0175982	11	5	8	0.226562	1
UniRef100_I1W5Y0	11	11	104	354	9.56522	96.9863	3.40385	0.00799851	1	0.0184982	0.0184982	11	7	5	0.548828	1
UniRef100_UPI00069C9F77	4	2	111	363	3.47826	99.4521	6.54054	0.031471	1	0.0186981	0.0186981	4	4	0	0.125	0.125
UniRef100_UPI0007BEA54A	4	4	111	361	3.47826	98.9041	3.25225	0.0981084	1	0.0186981	0.0186981	4	4	1	0.125	0.625
UniRef100_UPI000A6D1240	2	1	113	364	1.73913	99.726	6.44248	0.1441	1	0.0186981	0.0186981	2	2	1	0.5	1
UniRef100_UPI000A405448	2	1	113	364	1.73913	99.726	6.44248	0.1441	1	0.0186981	0.0186981	2	2	1	0.5	1
UniRef100_UPI000E10711D	2	1	113	364	1.73913	99.726	6.44248	0.1441	1	0.0186981	0.0186981	2	2	1	0.5	1
UniRef100_A0A380E472	45	121	70	244	39.1304	66.8493	1.29634	0.261439	1	0.0187981	0.0187981	11	7	9	0.0654297	0.548828
UniRef100_A0A7H9C1F6	5	1	110	364	4.34783	99.726	16.5455	0.00357377	1	0.0190981	0.0190981	5	4	1	0.375	0.375
UniRef100_Q6GE78	11	35	104	330	90.4348	9.58904	0.997253	1	1	0.0194981	0.0194981	4	3	4	0.125	0.625
UniRef100_A0A3G1RN05	8	5	107	360	6.95652	98.6301	5.38318	0.00376302	1	0.019598	0.019598	6	6	2	0.03125	0.6875
UniRef100_A0A0E1X6I6	9	32	106	333	92.1739	8.76712	0.88355	0.849917	1	0.019598	0.019598	8	5	6	0.289062	0.726562
UniRef100_A0A0E1VJH6	16	65	99	300	86.087	17.8082	0.745921	0.392376	1	0.019798	0.019798	11	5	10	0.0117188	1
UniRef100_A0A9Q7Y8N4	7	39	108	326	93.913	10.6849	0.541785	0.202142	1	0.019998	0.019998	6	2	5	0.21875	0.6875
UniRef100_A7X420	28	68	87	297	24.3478	81.3699	1.40568	0.183674	1	0.020098	0.020098	8	8	3	0.0078125	0.726562
UniRef100_A0A0D6WA52	61	175	54	190	53.0435	52.0548	1.22646	0.392288	1	0.020198	0.020198	9	6	7	0.179688	0.507812
UniRef100_A0A391EL22	10	31	105	334	8.69565	91.5068	1.02611	1	1	0.020198	0.020198	4	1	4	0.125	0.625
UniRef100_A0A3G1RN36	7	3	108	362	6.08696	99.1781	7.82099	0.00242078	1	0.020498	0.020498	6	5	2	0.21875	0.6875
UniRef100_A0A0U1MQ91	37	89	78	276	32.1739	75.6164	1.47105	0.113958	1	0.020498	0.020498	30	20	14	0.0987371	0.855536
UniRef100_A0A9Q4U929	10	24	105	341	8.69565	93.4247	1.35317	0.412293	1	0.020498	0.020498	9	2	9	0.00390625	0.179688
UniRef100_A0A9N8I5N7	4	16	111	349	96.5217	4.38356	0.786036	0.79446	1	0.0205979	0.0205979	11	3	11	0.000976562	0.226562
UniRef100_A0A0Z1CVN6	10	35	105	330	91.3043	9.58904	0.897959	0.856189	1	0.0205979	0.0205979	6	2	5	0.21875	0.6875
UniRef100_A0A0T7MZL0	4	15	111	350	96.5217	4.10959	0.840841	1	1	0.0205979	0.0205979	10	3	10	0.00195312	0.34375
UniRef100_A7X146	9	28	106	337	7.82609	92.3288	1.0219	1	1	0.0207979	0.0207979	6	3	5	0.21875	1
UniRef100_A0A390ZCI1	13	24	102	341	11.3043	93.4247	1.81087	0.109347	1	0.0209979	0.0209979	12	10	6	0.0385742	1
UniRef100_A0A0E1VRW5	61	210	54	155	46.9565	57.5342	0.833774	0.450426	1	0.0209979	0.0209979	18	10	14	0.0308838	0.814529
UniRef100_A0A9Q4MHE8	16	41	99	324	13.913	88.7671	1.27716	0.508241	1	0.0209979	0.0209979	4	2	4	0.125	1
UniRef100_A0A7I0YL72	49	154	66	211	42.6087	57.8082	1.01722	1	1	0.0209979	0.0209979	13	8	12	0.00341797	0.581055
UniRef100_A0A2I6PCW6	4	2	111	363	3.47826	99.4521	6.54054	0.031471	1	0.0216978	0.0216978	5	4	2	0.375	1
UniRef100_F8WKE9	9	5	106	360	7.82609	98.6301	6.11321	0.0013162	1	0.0219978	0.0219978	6	6	2	0.03125	0.6875
UniRef100_V5YQP1	9	5	106	360	7.82609	98.6301	6.11321	0.0013162	1	0.0219978	0.0219978	6	6	2	0.03125	0.6875
UniRef100_B9V2B9	9	5	106	360	7.82609	98.6301	6.11321	0.0013162	1	0.0219978	0.0219978	6	6	2	0.03125	0.6875
UniRef100_A0A0S4I3J3	9	5	106	360	7.82609	98.6301	6.11321	0.0013162	1	0.0219978	0.0219978	6	6	2	0.03125	0.6875
UniRef100_B9V2C0	9	5	106	360	7.82609	98.6301	6.11321	0.0013162	1	0.0219978	0.0219978	6	6	2	0.03125	0.6875
UniRef100_B9V2B5	9	5	106	360	7.82609	98.6301	6.11321	0.0013162	1	0.0219978	0.0219978	6	6	2	0.03125	0.6875
UniRef100_W8U8F4	115	351	0	14	100	3.83562	inf	0.0273586	1	0.0219978	0.0219978	14	14	0	0.00012207	0.00012207
UniRef100_W8TQU4	36	112	79	253	31.3043	69.3151	1.02939	0.908176	1	0.0219978	0.0219978	12	6	10	0.0385742	1
UniRef100_A0A9Q7Y178	7	18	108	347	6.08696	95.0685	1.24949	0.632579	1	0.0220978	0.0220978	4	1	4	0.125	0.625
UniRef100_A0A113JDA1	6	16	109	349	5.21739	95.6164	1.20069	0.798027	1	0.0220978	0.0220978	3	1	3	0.25	1
UniRef100_Q2G1M9	13	30	102	335	11.3043	91.7808	1.4232	0.348904	1	0.0221978	0.0221978	5	5	5	0.0625	0.0625
UniRef100_P72369	59	204	56	161	48.6957	55.8904	0.831495	0.392563	1	0.0222978	0.0222978	19	11	15	0.0192108	0.647606
UniRef100_A0A380DM99	42	133	73	232	36.5217	63.5616	1.0036	1	1	0.0223978	0.0223978	14	7	10	0.179565	1
UniRef100_A0A3M8ZH27	44	136	71	229	38.2609	62.7397	1.0435	0.912102	1	0.0224978	0.0224978	12	6	10	0.0385742	1
UniRef100_A0A0C6ERS2	72	229	43	136	37.3913	62.7397	0.994415	1	1	0.0225977	0.0225977	38	31	15	0.000116167	0.255875
UniRef100_A0A9Q8DG29	6	15	109	350	5.21739	95.8904	1.2844	0.604924	1	0.0229977	0.0229977	6	5	2	0.21875	0.6875
UniRef100_A0A9N8IPJ0	16	47	99	318	13.913	87.1233	1.09349	0.753438	1	0.0229977	0.0229977	9	7	5	0.179688	1
UniRef100_A0A9E8GB94	7	9	108	356	6.08696	97.5342	2.56379	0.0734777	1	0.0235976	0.0235976	12	7	7	0.774414	0.774414
UniRef100_A0A6G4QGR2	3	1	112	364	2.6087	99.726	9.75	0.0444233	1	0.0236976	0.0236976	3	3	1	0.25	1
UniRef100_M9NUJ8	7	7	108	358	6.08696	98.0822	3.31481	0.0490478	1	0.0236976	0.0236976	9	6	5	0.507812	1
UniRef100_A0A7U4FM85	22	54	93	311	19.1304	85.2055	1.36241	0.304879	1	0.0236976	0.0236976	7	7	3	0.015625	1
UniRef100_A0A641A4E9	13	24	102	341	11.3043	93.4247	1.81087	0.109347	1	0.0238976	0.0238976	8	8	5	0.0078125	0.726562
UniRef100_A0A7U7IE66	20	81	95	284	82.6087	22.1918	0.738142	0.296298	1	0.0238976	0.0238976	9	3	8	0.0390625	0.507812
UniRef100_A0A0D6HM53	22	61	93	304	19.1304	83.2877	1.17892	0.572478	1	0.0238976	0.0238976	9	6	8	0.0390625	0.507812
UniRef100_A0A0D6G6T5	9	29	106	336	92.1739	7.94521	0.983735	1	1	0.0240976	0.0240976	8	3	7	0.0703125	0.726562
UniRef100_A0A9Q4QQ53	14	40	101	325	12.1739	89.0411	1.12624	0.73583	1	0.0242976	0.0242976	9	4	6	0.507812	1
UniRef100_A0A090LWN2	47	159	68	206	59.1304	43.5616	0.895486	0.666014	1	0.0244976	0.0244976	17	16	7	0.000274658	0.629059
UniRef100_A0A380DK35	4	4	111	361	3.47826	98.9041	3.25225	0.0981084	1	0.0245975	0.0245975	4	4	1	0.125	0.625
UniRef100_Q99WS0	36	122	79	243	68.6957	33.4247	0.907657	0.733281	1	0.0245975	0.0245975	8	5	8	0.0078125	0.726562
UniRef100_Q99UA0	14	43	101	322	12.1739	88.2192	1.03799	0.87019	1	0.0249975	0.0249975	10	5	9	0.0214844	1
UniRef100_Q6GFE8	9	36	106	329	92.1739	9.86301	0.775943	0.58607	1	0.0250975	0.0250975	6	2	5	0.21875	0.6875
UniRef100_P66936	49	147	66	218	42.6087	59.726	1.10101	0.664854	1	0.0251975	0.0251975	10	7	9	0.0214844	0.34375
UniRef100_A0A9Q7Y981	9	37	106	328	92.1739	10.137	0.752677	0.586268	1	0.0252975	0.0252975	5	2	4	0.375	1
UniRef100_A0A8G2HZR2	3	1	112	364	2.6087	99.726	9.75	0.0444233	1	0.0253975	0.0253975	3	3	1	0.25	1
UniRef100_A0A0D3Q5Z8	13	40	102	325	11.3043	89.0411	1.03554	0.866416	1	0.0253975	0.0253975	10	7	8	0.109375	0.34375
UniRef100_UPI000A8D427E	4	2	111	363	3.47826	99.4521	6.54054	0.031471	1	0.0254975	0.0254975	3	3	2	0.25	1
UniRef100_A0A0D6GX94	33	84	82	281	28.6957	76.9863	1.34625	0.215705	1	0.0254975	0.0254975	17	9	13	0.0490417	1
UniRef100_Q2FZ91	5	18	110	347	95.6522	4.93151	0.876263	1	1	0.0258974	0.0258974	5	1	4	0.375	0.375
UniRef100_A0A0E1XAX0	1	17	114	348	99.1304	4.65753	0.179567	0.0874889	1	0.0259974	0.0259974	14	1	14	0.00012207	0.00183105
UniRef100_A0A0E1X9A8	3	16	112	349	97.3913	4.38356	0.584263	0.584124	1	0.0261974	0.0261974	14	2	14	0.00012207	0.0129395
UniRef100_A0A0E1X702	11	36	104	329	90.4348	9.86301	0.966613	1	1	0.0261974	0.0261974	4	2	4	0.125	1
UniRef100_A0A5C8XBY7	6	22	109	343	94.7826	6.0274	0.858215	1	1	0.0263974	0.0263974	8	1	8	0.0078125	0.0703125
UniRef100_P0A0N1	47	127	68	238	40.8696	65.2055	1.29528	0.266181	1	0.0264974	0.0264974	10	7	9	0.0214844	0.34375
UniRef100_A0A0E1VHV2	18	72	97	293	84.3478	19.726	0.755155	0.410992	1	0.0266973	0.0266973	9	6	9	0.00390625	0.507812
UniRef100_A0A0E1VPT9	9	44	106	321	92.1739	12.0548	0.619425	0.235799	1	0.0267973	0.0267973	6	2	5	0.21875	0.6875
UniRef100_B6V396	7	7	108	358	6.08696	98.0822	3.31481	0.0490478	1	0.0268973	0.0268973	13	7	7	1	1
UniRef100_A0A2W3NFM3	28	67	87	298	24.3478	81.6438	1.43146	0.179586	1	0.0268973	0.0268973	11	6	8	0.226562	1
UniRef100_A0A0E1XAX5	3	15	112	350	97.3913	4.10959	0.625	0.582432	1	0.0268973	0.0268973	14	2	14	0.00012207	0.0129395
UniRef100_A0A9Q4UZY3	10	13	105	352	8.69565	96.4384	2.57875	0.0411846	1	0.0269973	0.0269973	8	7	4	0.0703125	1
UniRef100_A7X0H6	35	109	80	256	30.4348	70.137	1.02752	0.907543	1	0.0271973	0.0271973	7	5	7	0.015625	0.453125
UniRef100_Q2FID4	105	307	10	58	91.3043	15.8904	1.98371	0.0649733	1	0.0282972	0.0282972	23	22	5	5.72205e-06	0.010622
UniRef100_A0A9Q7Y034	9	35	106	330	92.1739	9.58904	0.800539	0.711334	1	0.0282972	0.0282972	4	1	4	0.125	0.625
UniRef100_Q2FER8	35	93	80	272	30.4348	74.5205	1.27957	0.333367	1	0.0283972	0.0283972	12	7	9	0.145996	0.774414
UniRef100_A0A0E1X707	4	2	111	363	3.47826	99.4521	6.54054	0.031471	1	0.0285971	0.0285971	6	4	2	0.6875	0.6875
UniRef100_A0A6H3Q761	4	2	111	363	3.47826	99.4521	6.54054	0.031471	1	0.0287971	0.0287971	6	4	2	0.6875	0.6875
UniRef100_A0A9Q4MG72	21	79	94	286	81.7391	21.6438	0.80878	0.510748	1	0.0290971	0.0290971	9	5	9	0.00390625	1
UniRef100_A0A9N8NT61	14	33	101	332	12.1739	90.9589	1.39454	0.367865	1	0.0294971	0.0294971	9	9	5	0.00390625	1
UniRef100_A0A9Q1T5N9	4	3	111	362	3.47826	99.1781	4.34835	0.0599568	1	0.029597	0.029597	5	4	2	0.375	1
UniRef100_UPI0001C0BF4D	3	3	112	362	2.6087	99.1781	3.23214	0.152027	1	0.029597	0.029597	4	3	3	0.625	0.625
UniRef100_A0A2Y2GZN0	35	122	80	243	69.5652	33.4247	0.871414	0.571036	1	0.029597	0.029597	11	7	9	0.0654297	0.548828
UniRef100_Q2FI17	115	352	0	13	100	3.56164	inf	0.0448461	1	0.029797	0.029797	12	12	0	0.000488281	0.000488281
UniRef100_D2JLH7	3	1	112	364	2.6087	99.726	9.75	0.0444233	1	0.029997	0.029997	3	3	1	0.25	1
UniRef100_A0A9Q7J2E0	4	2	111	363	3.47826	99.4521	6.54054	0.031471	1	0.030297	0.030297	6	4	2	0.6875	0.6875
UniRef100_A0A0H3JKM7	11	22	104	343	9.56522	93.9726	1.64904	0.206038	1	0.030497	0.030497	9	8	2	0.0390625	0.179688
UniRef100_A0A0D6HEB1	10	33	105	332	91.3043	9.0411	0.958153	1	1	0.0305969	0.0305969	7	1	7	0.015625	0.125
UniRef100_A0A133Q415	33	80	82	285	28.6957	78.0822	1.43369	0.165166	1	0.0308969	0.0308969	8	5	7	0.0703125	0.726562
UniRef100_P18416	9	33	106	332	92.1739	9.0411	0.854202	0.85013	1	0.0310969	0.0310969	11	4	9	0.0654297	0.548828
UniRef100_T1YCL1	16	49	99	316	13.913	86.5753	1.04226	0.876707	1	0.0310969	0.0310969	6	6	2	0.03125	0.6875
UniRef100_UPI00044E36A1	6	4	109	361	5.21739	98.9041	4.96789	0.0149932	1	0.0312969	0.0312969	6	5	2	0.21875	0.6875
UniRef100_Q5HDV2	97	309	18	56	15.6522	84.6575	0.976627	1	1	0.0317968	0.0317968	15	15	4	6.10352e-05	0.118469
UniRef100_UPI0002E77ABF	4	14	111	351	96.5217	3.83562	0.903475	1	1	0.0318968	0.0318968	7	1	7	0.015625	0.125
UniRef100_A0A068A5Q8	7	9	108	356	6.08696	97.5342	2.56379	0.0734777	1	0.0320968	0.0320968	11	6	6	1	1
UniRef100_A0A6B5D097	2	16	113	349	98.2609	4.38356	0.386062	0.264901	1	0.0320968	0.0320968	16	2	15	0.000518799	0.00418091
UniRef100_W8TU08	88	287	27	78	23.4783	78.6301	0.885792	0.698058	1	0.0320968	0.0320968	19	18	7	7.62939e-05	0.359283
UniRef100_A0A0U1MQK4	11	57	104	308	90.4348	15.6164	0.571525	0.125142	1	0.0322968	0.0322968	4	2	4	0.125	1
UniRef100_A0A0E1XBW8	10	33	105	332	91.3043	9.0411	0.958153	1	1	0.0322968	0.0322968	6	3	5	0.21875	1
UniRef100_A0A7U7F020	11	33	104	332	9.56522	90.9589	1.0641	0.854028	1	0.0323968	0.0323968	7	2	6	0.125	0.453125
UniRef100_A0A0E1XBI0	2	15	113	350	98.2609	4.10959	0.412979	0.383924	1	0.0326967	0.0326967	13	2	13	0.000244141	0.0224609
UniRef100_A0A0E7RYR7	16	53	99	312	86.087	14.5205	0.951401	1	1	0.0326967	0.0326967	8	7	4	0.0703125	1
UniRef100_A0A0U1MLB5	10	57	105	308	91.3043	15.6164	0.51462	0.0651473	1	0.0327967	0.0327967	7	2	5	0.453125	0.453125
UniRef100_W8U5Z5	66	196	49	169	57.3913	46.3014	1.16139	0.520283	1	0.0332967	0.0332967	8	4	6	0.289062	1
UniRef100_A0A7H9C1M0	34	120	81	245	70.4348	32.8767	0.856996	0.567278	1	0.0334967	0.0334967	11	5	10	0.0117188	1
UniRef100_A0A166N9R1	28	76	87	289	24.3478	79.1781	1.22384	0.437416	1	0.0335966	0.0335966	8	8	4	0.0078125	1
UniRef100_X5EHW8	56	191	59	174	51.3043	52.3288	0.864673	0.522004	1	0.0335966	0.0335966	19	17	8	0.000728607	0.647606
UniRef100_UPI0002D33FFC	11	47	104	318	90.4348	12.8767	0.71563	0.413287	1	0.0336966	0.0336966	5	3	4	0.375	1
UniRef100_O87115	111	363	4	2	3.47826	99.4521	0.152893	0.031471	1	0.0338966	0.0338966	6	2	4	0.6875	0.6875
UniRef100_UPI00021AD5C4	5	38	110	327	95.6522	10.411	0.391148	0.0594981	1	0.0340966	0.0340966	7	3	5	0.453125	1
UniRef100_P67040	10	30	105	335	8.69565	91.7808	1.06349	0.848052	1	0.0340966	0.0340966	5	1	4	0.375	0.375
UniRef100_A7X1Q7	111	361	4	4	3.47826	98.9041	0.307479	0.0981084	1	0.0344966	0.0344966	7	3	4	1	1
UniRef100_A0A0E7WS66	6	14	109	351	5.21739	96.1644	1.38008	0.591929	1	0.0344966	0.0344966	3	1	3	0.25	1
UniRef100_D2J9R5	11	12	104	353	9.56522	96.7123	3.11138	0.0106146	1	0.0346965	0.0346965	13	8	6	0.581055	1
UniRef100_A0A9Q4ME86	16	41	99	324	13.913	88.7671	1.27716	0.508241	1	0.0346965	0.0346965	5	3	4	0.375	1
UniRef100_A0A0E7WF08	15	27	100	338	13.0435	92.6027	1.87778	0.0863696	1	0.0348965	0.0348965	7	7	3	0.015625	1
UniRef100_A0A8B0ZQ48	3	3	112	362	2.6087	99.1781	3.23214	0.152027	1	0.0349965	0.0349965	3	3	1	0.25	1
UniRef100_A0A6A8FC81	4	2	111	363	3.47826	99.4521	6.54054	0.031471	1	0.0353965	0.0353965	6	4	2	0.6875	0.6875
UniRef100_A7X574	34	101	81	264	29.5652	72.3288	1.09718	0.721757	1	0.0353965	0.0353965	10	5	9	0.0214844	1
UniRef100_I2FGE5	12	44	103	321	89.5652	12.0548	0.849956	0.740076	1	0.0357964	0.0357964	14	5	12	0.0129395	0.42395
UniRef100_X5EKR3	40	113	75	252	34.7826	69.0411	1.18938	0.491294	1	0.0363964	0.0363964	16	15	9	0.000518799	0.803619
UniRef100_A0A641A825	23	61	92	304	20	83.2877	1.2459	0.402789	1	0.0364964	0.0364964	7	7	5	0.015625	0.453125
UniRef100_A0A9N8I2D6	10	49	105	316	91.3043	13.4247	0.614189	0.196323	1	0.0365963	0.0365963	8	4	5	0.726562	1
UniRef100_A0A2U0IL67	11	34	104	331	9.56522	90.6849	1.02969	1	1	0.0366963	0.0366963	8	4	7	0.0703125	1
UniRef100_Q93SM3	65	186	50	179	56.5217	49.0411	1.25108	0.335573	1	0.0368963	0.0368963	21	18	10	0.00148964	1
UniRef100_X5EG20	37	125	78	240	67.8261	34.2466	0.910769	0.735	1	0.0370963	0.0370963	13	9	10	0.0922852	0.266846
UniRef100_A0A9Q4MG76	7	27	108	338	93.913	7.39726	0.811385	0.834922	1	0.0370963	0.0370963	4	1	4	0.125	0.625
UniRef100_A0A0E3XCU5	40	96	75	269	34.7826	73.6986	1.49444	0.096264	1	0.0377962	0.0377962	36	24	17	0.0652453	0.867939
UniRef100_Q6GEL4	12	36	103	329	10.4348	90.137	1.06472	0.85927	1	0.0377962	0.0377962	3	2	3	0.25	1
UniRef100_X5E1M5	28	68	87	297	24.3478	81.3699	1.40568	0.183674	1	0.0378962	0.0378962	11	10	6	0.0117188	1
UniRef100_A0A658X3N3	19	70	96	295	83.4783	19.1781	0.834077	0.583583	1	0.0378962	0.0378962	10	7	10	0.00195312	0.34375
UniRef100_Q2FHZ1	109	325	6	40	94.7826	10.9589	2.2359	0.0712804	1	0.0380962	0.0380962	18	17	3	0.000144958	0.00753784
UniRef100_Q8SDJ8	3	23	112	342	97.3913	6.30137	0.398292	0.158709	1	0.0380962	0.0380962	10	1	10	0.00195312	0.0214844
UniRef100_Q6GHQ1	11	34	104	331	9.56522	90.6849	1.02969	1	1	0.0380962	0.0380962	4	2	4	0.125	1
UniRef100_Q2FVK1	58	140	57	225	50.4348	61.6438	1.63534	0.0229991	1	0.0383962	0.0383962	14	13	3	0.00183105	0.057373
UniRef100_A0A9Q4MHH3	18	43	97	322	15.6522	88.2192	1.38959	0.266365	1	0.0384962	0.0384962	3	2	3	0.25	1
UniRef100_A0A380DMK7	16	49	99	316	13.913	86.5753	1.04226	0.876707	1	0.0384962	0.0384962	5	5	3	0.0625	1
UniRef100_A0A659I9E6	3	6	112	359	2.6087	98.3562	1.60268	0.452892	1	0.0385961	0.0385961	3	3	2	0.25	1
UniRef100_T1YAK1	21	53	94	312	18.2609	85.4795	1.31513	0.374122	1	0.0386961	0.0386961	24	15	11	0.307456	0.83882
UniRef100_A0A0D6HGK1	13	36	102	329	11.3043	90.137	1.16476	0.723878	1	0.0387961	0.0387961	16	6	13	0.0212708	0.454498
UniRef100_A0A2Y1UUF3	51	172	64	193	55.6522	47.1233	0.894168	0.668223	1	0.0388961	0.0388961	16	9	12	0.0768127	0.803619
UniRef100_T1YBQ7	37	101	78	264	32.1739	72.3288	1.23991	0.34767	1	0.0390961	0.0390961	9	9	4	0.00390625	1
UniRef100_A0A0U1MKY6	9	50	106	315	92.1739	13.6986	0.534906	0.104778	1	0.0391961	0.0391961	9	4	6	0.507812	1
UniRef100_A0A6G4IV98	3	3	112	362	2.6087	99.1781	3.23214	0.152027	1	0.0391961	0.0391961	3	3	2	0.25	1
UniRef100_A7X204	91	269	24	96	79.1304	26.3014	1.35316	0.267729	1	0.0391961	0.0391961	12	7	8	0.387695	0.774414
UniRef100_Q53753	49	138	66	227	42.6087	62.1918	1.22123	0.381202	1	0.0392961	0.0392961	19	13	14	0.0635681	0.167068
UniRef100_A0A9Q4UZE5	17	44	98	321	14.7826	87.9452	1.26554	0.426773	1	0.0392961	0.0392961	10	10	3	0.00195312	0.34375
UniRef100_A0A0U1MNK4	11	58	104	307	90.4348	15.8904	0.559847	0.0960338	1	0.0393961	0.0393961	5	2	4	0.375	1
UniRef100_A0A659I6R0	5	13	110	352	4.34783	96.4384	1.23077	0.778238	1	0.039696	0.039696	4	4	2	0.125	1
UniRef100_A0A9Q8DH75	41	153	74	212	64.3478	41.9178	0.767709	0.275875	1	0.039896	0.039896	30	17	20	0.0987371	0.584665
UniRef100_Q2G2B1	6	18	109	347	5.21739	95.0685	1.06116	1	1	0.039996	0.039996	3	1	3	0.25	1
UniRef100_A7WZS6	79	253	36	112	31.3043	69.3151	0.971454	0.908176	1	0.040096	0.040096	23	22	10	5.72205e-06	0.677639
UniRef100_A0A0E1VN82	8	39	107	326	93.0435	10.6849	0.62497	0.283487	1	0.040196	0.040196	7	3	5	0.453125	1
UniRef100_A0A0D6WBK1	19	53	96	312	16.5217	85.4795	1.16509	0.653326	1	0.040296	0.040296	5	2	5	0.0625	1
UniRef100_Q5HIC5	27	70	88	295	23.4783	80.8219	1.29302	0.351327	1	0.040396	0.040396	6	3	6	0.03125	1
UniRef100_Q4ZBM9	3	1	112	364	2.6087	99.726	9.75	0.0444233	1	0.040496	0.040496	4	3	1	0.625	0.625
UniRef100_A0A133Q0X3	34	83	81	282	29.5652	77.2603	1.42615	0.137531	1	0.040496	0.040496	12	11	5	0.00634766	0.774414
UniRef100_A0A2U0IJN8	15	28	100	337	13.0435	92.3288	1.80536	0.0917254	1	0.0405959	0.0405959	12	10	4	0.0385742	0.387695
UniRef100_T1YAL0	13	30	102	335	11.3043	91.7808	1.4232	0.348904	1	0.0405959	0.0405959	8	6	3	0.289062	0.726562
UniRef100_A0A0Z2VVX7	10	35	105	330	91.3043	9.58904	0.897959	0.856189	1	0.0405959	0.0405959	7	3	5	0.453125	1
UniRef100_A0A9Q7PAF3	5	6	110	359	4.34783	98.3562	2.7197	0.143492	1	0.0411959	0.0411959	10	5	5	1	1
UniRef100_A0A0D1HYT8	27	72	88	293	23.4783	80.274	1.24858	0.427867	1	0.0412959	0.0412959	9	4	8	0.0390625	1
UniRef100_A0A380EEB9	34	72	81	293	29.5652	80.274	1.70816	0.0290799	1	0.0413959	0.0413959	9	9	3	0.00390625	0.507812
UniRef100_A0A499SAB7	4	3	111	362	3.47826	99.1781	4.34835	0.0599568	1	0.0413959	0.0413959	6	4	2	0.6875	0.6875
UniRef100_T1YDT4	7	15	108	350	6.08696	95.8904	1.51235	0.441768	1	0.0413959	0.0413959	6	6	4	0.03125	0.6875
UniRef100_A0A9Q4MEJ0	18	47	97	318	15.6522	87.1233	1.25554	0.438195	1	0.0415958	0.0415958	6	3	5	0.21875	1
UniRef100_A0A0D3Q6Z6	6	25	109	340	94.7826	6.84932	0.748624	0.665673	1	0.0416958	0.0416958	6	1	5	0.21875	0.21875
UniRef100_A0A6B5Q8A3	3	1	112	364	2.6087	99.726	9.75	0.0444233	1	0.0417958	0.0417958	4	3	1	0.625	0.625
UniRef100_A0A0D3Q927	38	104	77	261	33.0435	71.5068	1.23851	0.351203	1	0.0417958	0.0417958	14	7	10	0.179565	1
UniRef100_M9QWZ2	50	133	65	232	43.4783	63.5616	1.34182	0.187379	1	0.0420958	0.0420958	47	29	23	0.143865	1
UniRef100_A0A9Q4MDL9	31	91	84	274	26.9565	75.0685	1.1112	0.712725	1	0.0420958	0.0420958	4	3	4	0.125	0.625
UniRef100_A0A0U1MGP8	3	1	112	364	2.6087	99.726	9.75	0.0444233	1	0.0421958	0.0421958	4	3	1	0.625	0.625
UniRef100_A0A659ZYF5	3	1	112	364	2.6087	99.726	9.75	0.0444233	1	0.0422958	0.0422958	4	3	1	0.625	0.625
UniRef100_A0A0E3TAJ4	3	1	112	364	2.6087	99.726	9.75	0.0444233	1	0.0422958	0.0422958	4	3	1	0.625	0.625
UniRef100_D2JAL2	7	22	108	343	6.08696	93.9726	1.01052	1	1	0.0423958	0.0423958	7	2	6	0.125	0.453125
UniRef100_W8U1I5	37	88	78	277	32.1739	75.8904	1.49315	0.0893962	1	0.0426957	0.0426957	10	7	8	0.109375	0.34375
UniRef100_R9QT57	8	38	107	327	93.0435	10.411	0.643384	0.363469	1	0.0426957	0.0426957	29	5	26	1.52364e-05	0.000546113
UniRef100_Q2FK46	26	65	89	300	22.6087	82.1918	1.34831	0.275448	1	0.0427957	0.0427957	8	5	6	0.289062	0.726562
UniRef100_A0A7Z7R0E3	11	36	104	329	90.4348	9.86301	0.966613	1	1	0.0427957	0.0427957	5	2	4	0.375	1
UniRef100_A0A0E1XCN0	12	36	103	329	10.4348	90.137	1.06472	0.85927	1	0.0428957	0.0428957	3	2	3	0.25	1
UniRef100_A7WYQ5	106	336	9	29	92.1739	7.94521	1.01653	1	1	0.0428957	0.0428957	16	16	4	3.05176e-05	0.0768127
UniRef100_R9QST7	6	8	109	357	5.21739	97.8082	2.45642	0.111379	1	0.0431957	0.0431957	4	4	2	0.125	1
UniRef100_A0A482QMA0	15	35	100	330	13.0435	90.411	1.41429	0.296114	1	0.0432957	0.0432957	12	9	5	0.145996	0.774414
UniRef100_A0A0C6DV20	3	1	112	364	2.6087	99.726	9.75	0.0444233	1	0.0433957	0.0433957	4	3	1	0.625	0.625
UniRef100_T1YD61	102	331	13	34	11.3043	90.6849	0.805949	0.58925	1	0.0433957	0.0433957	9	5	6	0.507812	1
UniRef100_A0A2X2KN89	5	4	110	361	4.34783	98.9041	4.10227	0.0397493	1	0.0434957	0.0434957	9	5	4	1	1
UniRef100_UPI000E3D7264	3	2	112	363	2.6087	99.4521	4.86161	0.0917489	1	0.0435956	0.0435956	4	3	2	0.625	1
UniRef100_A0A9N8FBQ2	11	56	104	309	90.4348	15.3425	0.58362	0.125962	1	0.0435956	0.0435956	5	2	4	0.375	1
UniRef100_Q2G222	19	59	96	306	16.5217	83.8356	1.02648	1	1	0.0435956	0.0435956	11	5	9	0.0654297	1
UniRef100_A0A6B5FT88	21	59	94	306	18.2609	83.8356	1.15867	0.666895	1	0.0436956	0.0436956	6	4	6	0.03125	0.6875
UniRef100_A0A6B5DMT6	2	15	113	350	98.2609	4.10959	0.412979	0.383924	1	0.0438956	0.0438956	13	1	13	0.000244141	0.00341797
UniRef100_A0A7U3T219	3	1	112	364	2.6087	99.726	9.75	0.0444233	1	0.0441956	0.0441956	4	3	1	0.625	0.625
UniRef100_A0A6H3Q3Y6	9	19	106	346	7.82609	94.7945	1.54618	0.35985	1	0.0441956	0.0441956	9	6	4	0.507812	1
UniRef100_A0A162FEK7	11	36	104	329	90.4348	9.86301	0.966613	1	1	0.0441956	0.0441956	5	2	4	0.375	1
UniRef100_A0A8G2M9I5	3	1	112	364	2.6087	99.726	9.75	0.0444233	1	0.0442956	0.0442956	4	3	1	0.625	0.625
UniRef100_A0A9Q4MF54	15	40	100	325	13.0435	89.0411	1.21875	0.614399	1	0.0444956	0.0444956	7	3	5	0.453125	1
UniRef100_A0A0U1MM33	14	39	101	326	12.1739	89.3151	1.15867	0.732895	1	0.0445955	0.0445955	11	10	1	0.0117188	0.0117188
UniRef100_UPI0007CA4208	3	14	112	351	97.3913	3.83562	0.671556	0.773128	1	0.0445955	0.0445955	3	2	3	0.25	1
UniRef100_A0A131JAK2	12	39	103	326	89.5652	10.6849	0.973861	1	1	0.0445955	0.0445955	4	1	4	0.125	0.625
UniRef100_UPI000A665491	3	1	112	364	2.6087	99.726	9.75	0.0444233	1	0.0447955	0.0447955	4	3	1	0.625	0.625
UniRef100_Q6GI13	11	36	104	329	90.4348	9.86301	0.966613	1	1	0.0447955	0.0447955	5	2	4	0.375	1
UniRef100_A0A7I0YM83	12	60	103	305	89.5652	16.4384	0.592233	0.134779	1	0.0448955	0.0448955	4	1	4	0.125	0.625
UniRef100_UPI00069CC22C	3	4	112	361	2.6087	98.9041	2.41741	0.366061	1	0.0448955	0.0448955	3	3	2	0.25	1
UniRef100_A0A3A3ARR2	10	30	105	335	8.69565	91.7808	1.06349	0.848052	1	0.0448955	0.0448955	5	2	4	0.375	1
UniRef100_A0A9Q4M9S0	29	92	86	273	25.2174	74.7945	1.00063	1	1	0.0448955	0.0448955	6	4	5	0.21875	0.6875
UniRef100_A0A068A241	12	38	103	327	10.4348	89.589	1.00255	1	1	0.0449955	0.0449955	20	8	16	0.0118179	0.503445
UniRef100_M1SVD9	3	1	112	364	2.6087	99.726	9.75	0.0444233	1	0.0451955	0.0451955	4	3	1	0.625	0.625
UniRef100_P67291	112	364	3	1	2.6087	99.726	0.102564	0.0444233	1	0.0452955	0.0452955	4	1	3	0.625	0.625
UniRef100_A0A0D3Q9N4	23	61	92	304	20	83.2877	1.2459	0.402789	1	0.0452955	0.0452955	14	8	9	0.42395	0.790527
UniRef100_R9QSQ1	11	12	104	353	9.56522	96.7123	3.11138	0.0106146	1	0.0453955	0.0453955	10	7	5	0.34375	1
UniRef100_A0A9N8FEC3	9	51	106	314	92.1739	13.9726	0.522752	0.104929	1	0.0453955	0.0453955	10	5	6	0.753906	1
UniRef100_A0A9N8FF11	10	53	105	312	91.3043	14.5205	0.560647	0.115534	1	0.0453955	0.0453955	6	2	5	0.21875	0.6875
UniRef100_Q6GFF1	11	36	104	329	90.4348	9.86301	0.966613	1	1	0.0453955	0.0453955	5	2	4	0.375	1
UniRef100_I1W5X5	3	1	112	364	2.6087	99.726	9.75	0.0444233	1	0.0454955	0.0454955	4	3	1	0.625	0.625
UniRef100_A0A0E1VXD2	9	43	106	322	92.1739	11.7808	0.635805	0.301907	1	0.0456954	0.0456954	5	2	4	0.375	1
UniRef100_A0A0E1VKZ9	9	43	106	322	92.1739	11.7808	0.635805	0.301907	1	0.0456954	0.0456954	5	2	4	0.375	1
UniRef100_A0A9P1S9V9	10	41	105	324	91.3043	11.2329	0.752613	0.492641	1	0.0457954	0.0457954	4	1	4	0.125	0.625
UniRef100_X5DWN8	60	184	55	181	52.1739	49.589	1.07312	0.749601	1	0.0458954	0.0458954	24	15	16	0.15159	0.307456
UniRef100_W8TVH0	75	202	40	163	65.2174	44.6575	1.513	0.0663021	1	0.0461954	0.0461954	18	17	6	0.000144958	0.237885
UniRef100_A0A0E1VNV0	9	42	106	323	92.1739	11.5068	0.652965	0.301857	1	0.0461954	0.0461954	5	2	4	0.375	1
UniRef100_A0A168EW62	85	255	30	110	73.913	30.137	1.22222	0.48037	1	0.0461954	0.0461954	9	6	7	0.179688	0.507812
UniRef100_A0A371YI63	10	34	105	331	91.3043	9.31507	0.927171	1	1	0.0461954	0.0461954	7	3	5	0.453125	1
UniRef100_W8UVH2	59	165	56	200	51.3043	54.7945	1.27706	0.284072	1	0.0463954	0.0463954	6	4	6	0.03125	0.6875
UniRef100_A0A9Q4QRE8	16	42	99	323	13.913	88.4932	1.24291	0.512563	1	0.0465953	0.0465953	5	2	4	0.375	1
UniRef100_A0A9Q4U875	9	54	106	311	92.1739	14.7945	0.488994	0.0577959	1	0.0466953	0.0466953	4	2	4	0.125	1
UniRef100_UPI0007BE9AB0	4	4	111	361	3.47826	98.9041	3.25225	0.0981084	1	0.0466953	0.0466953	3	3	1	0.25	1
UniRef100_Q99V70	14	36	101	329	12.1739	90.137	1.26678	0.485872	1	0.0466953	0.0466953	11	6	7	0.548828	1
UniRef100_A0A9Q4QP05	16	42	99	323	13.913	88.4932	1.24291	0.512563	1	0.0467953	0.0467953	4	1	4	0.125	0.625
UniRef100_A0A9Q4MCR0	15	40	100	325	13.0435	89.0411	1.21875	0.614399	1	0.0467953	0.0467953	7	3	5	0.453125	1
UniRef100_W8U0B2	75	228	40	137	65.2174	37.5342	1.12664	0.657854	1	0.0467953	0.0467953	20	12	13	0.263176	0.503445
UniRef100_A0A131HSE1	11	35	104	330	90.4348	9.58904	0.997253	1	1	0.0467953	0.0467953	5	3	4	0.375	1
UniRef100_UPI0021090783	1	16	114	349	99.1304	4.38356	0.191338	0.0864743	1	0.0468953	0.0468953	13	1	13	0.000244141	0.00341797
UniRef100_A0A4T9Z1K5	66	176	49	189	57.3913	51.7808	1.44643	0.0884744	1	0.0471953	0.0471953	11	11	5	0.000976562	1
UniRef100_P16667	19	47	96	318	16.5217	87.1233	1.3391	0.351739	1	0.0475952	0.0475952	5	2	5	0.0625	1
UniRef100_A0A0D1JF17	112	364	3	1	2.6087	99.726	0.102564	0.0444233	1	0.0477952	0.0477952	4	1	3	0.625	0.625
UniRef100_A0A7U7IBZ8	13	25	102	340	11.3043	93.1507	1.73333	0.163436	1	0.0478952	0.0478952	8	8	2	0.0078125	0.289062
UniRef100_A7X2G6	8	28	107	337	93.0435	7.67123	0.899866	1	1	0.0478952	0.0478952	4	2	4	0.125	1
UniRef100_P0A099	65	206	50	159	56.5217	43.5616	1.0034	1	1	0.0479952	0.0479952	28	25	12	2.74405e-05	0.571588
UniRef100_A0A5C8X6J1	18	51	97	314	15.6522	86.0274	1.14251	0.649404	1	0.0480952	0.0480952	9	8	7	0.0390625	0.179688
UniRef100_A0A133PTA8	42	123	73	242	36.5217	66.3014	1.13197	0.575644	1	0.0481952	0.0481952	20	17	8	0.00257683	0.503445
UniRef100_A0A7Z7QZG2	11	35	104	330	90.4348	9.58904	0.997253	1	1	0.0481952	0.0481952	5	3	4	0.375	1
UniRef100_A0A9Q7Y6U5	8	43	107	322	93.0435	11.7808	0.559878	0.166835	1	0.0482952	0.0482952	18	7	15	0.00753784	0.480682
UniRef100_A0A0E1VJB3	11	31	104	334	9.56522	91.5068	1.13958	0.707459	1	0.0485951	0.0485951	8	8	2	0.0078125	0.289062
UniRef100_Q6G7T8	23	72	92	293	20	80.274	1.01736	1	1	0.0489951	0.0489951	7	7	6	0.015625	0.125
UniRef100_A0A9P3DND5	16	40	99	325	13.913	89.0411	1.31313	0.406189	1	0.0492951	0.0492951	18	15	8	0.00753784	0.814529
UniRef100_Q5HHP2	74	222	41	143	64.3478	39.1781	1.1626	0.511692	1	0.0492951	0.0492951	20	19	6	4.00543e-05	0.115318
UniRef100_A0A6K4MS19	1	21	114	344	99.1304	5.75342	0.143693	0.0368585	1	0.0494951	0.0494951	8	1	7	0.0703125	0.0703125
UniRef100_UPI0001C0B4B1	2	17	113	348	98.2609	4.65753	0.362311	0.269766	1	0.0494951	0.0494951	15	2	14	0.000976562	0.00738525
UniRef100_A0A0D6HLL6	24	66	91	299	20.8696	81.9178	1.19481	0.496188	1	0.0494951	0.0494951	11	10	5	0.0117188	1
UniRef100_W8U4F1	42	164	73	201	63.4783	44.9315	0.705145	0.130427	1	0.049695	0.049695	36	20	22	0.242985	0.617719
UniRef100_R9QSV7	6	7	109	358	5.21739	98.0822	2.8152	0.0913087	1	0.049795	0.049795	5	4	3	0.375	1
UniRef100_A0A0E1VNS8	29	97	86	268	74.7826	26.5753	0.931671	0.809072	1	0.049895	0.049895	9	6	7	0.179688	0.507812
UniRef100_A0A2U0IM46	10	30	105	335	8.69565	91.7808	1.06349	0.848052	1	0.049995	0.049995	7	3	5	0.453125	1
UniRef100_Q4ZE68	8	18	107	347	6.95652	95.0685	1.44133	0.477455	1	0.050295	0.050295	11	4	10	0.0117188	0.548828
UniRef100_A0A5C8XCC9	7	22	108	343	6.08696	93.9726	1.01052	1	1	0.0505949	0.0505949	9	2	8	0.0390625	0.179688
UniRef100_A0A7T1NDF7	6	4	109	361	5.21739	98.9041	4.96789	0.0149932	1	0.0506949	0.0506949	9	5	4	1	1
UniRef100_A0A090M1W2	11	28	104	337	9.56522	92.3288	1.27301	0.557355	1	0.0507949	0.0507949	11	8	5	0.226562	1
UniRef100_UPI0001C0B4B0	2	16	113	349	98.2609	4.38356	0.386062	0.264901	1	0.0511949	0.0511949	15	2	14	0.000976562	0.00738525
UniRef100_UPI000449867B	7	17	108	348	6.08696	95.3425	1.3268	0.623126	1	0.0512949	0.0512949	5	2	5	0.0625	1
UniRef100_A0A641A701	26	60	89	305	22.6087	83.5616	1.48502	0.162507	1	0.0513949	0.0513949	5	5	4	0.0625	0.375
UniRef100_UPI0005DC7AD7	2	0	113	365	1.73913	100	inf	0.0570198	1	0.0514949	0.0514949	2	2	0	0.5	0.5
UniRef100_R9QT89	12	31	103	334	10.4348	91.5068	1.25525	0.574315	1	0.0514949	0.0514949	15	5	13	0.00738525	0.301758
UniRef100_W8TU72	70	187	45	178	60.8696	48.7671	1.48069	0.0860634	1	0.0516948	0.0516948	12	12	6	0.000488281	1
UniRef100_A0A380E4J9	7	27	108	338	93.913	7.39726	0.811385	0.834922	1	0.0519948	0.0519948	28	6	25	2.74405e-05	0.00371917
UniRef100_Q9EY53	11	35	104	330	90.4348	9.58904	0.997253	1	1	0.0519948	0.0519948	4	2	4	0.125	1
UniRef100_T1YAA8	26	58	89	307	22.6087	84.1096	1.5463	0.120877	1	0.0520948	0.0520948	9	9	6	0.00390625	0.507812
UniRef100_A0A0T7M3W3	18	35	97	330	15.6522	90.411	1.74963	0.086983	1	0.0525947	0.0525947	24	14	11	0.541256	0.83882
UniRef100_UPI000AF216BE	2	0	113	365	1.73913	100	inf	0.0570198	1	0.0527947	0.0527947	2	2	0	0.5	0.5
UniRef100_A0A0E7X8W5	5	18	110	347	95.6522	4.93151	0.876263	1	1	0.0529947	0.0529947	3	1	3	0.25	1
UniRef100_A0A167GM22	9	31	106	334	92.1739	8.49315	0.91479	1	1	0.0529947	0.0529947	5	3	5	0.0625	1
UniRef100_A0A9P1WJ93	5	27	110	338	95.6522	7.39726	0.569024	0.291999	1	0.0531947	0.0531947	11	4	8	0.226562	0.548828
UniRef100_UPI0004508037	2	0	113	365	1.73913	100	inf	0.0570198	1	0.0532947	0.0532947	2	2	0	0.5	0.5
UniRef100_Q9ZNG7	91	282	24	83	79.1304	22.7397	1.11599	0.797281	1	0.0535946	0.0535946	15	15	5	6.10352e-05	0.301758
UniRef100_A7WWR5	108	321	7	44	93.913	12.0548	2.11482	0.0824349	1	0.0537946	0.0537946	20	20	5	1.90735e-06	0.0413895
UniRef100_UPI000AE4347A	2	0	113	365	1.73913	100	inf	0.0570198	1	0.0538946	0.0538946	2	2	0	0.5	0.5
UniRef100_Q6GHU5	12	37	103	328	10.4348	89.863	1.0328	1	1	0.0538946	0.0538946	3	1	3	0.25	1
UniRef100_A0A140HKN1	43	108	72	257	37.3913	70.411	1.42117	0.134309	1	0.0539946	0.0539946	17	15	7	0.00234985	0.629059
UniRef100_Q6GHC6	12	24	103	341	10.4348	93.4247	1.65534	0.221174	1	0.0539946	0.0539946	7	7	2	0.015625	0.453125
UniRef100_A0A390ZLD1	12	22	103	343	10.4348	93.9726	1.81642	0.142093	1	0.0540946	0.0540946	8	8	2	0.0078125	0.289062
UniRef100_T1YC99	19	46	96	319	16.5217	87.3973	1.37251	0.27813	1	0.0540946	0.0540946	4	2	4	0.125	1
UniRef100_D2J8G0	10	13	105	352	8.69565	96.4384	2.57875	0.0411846	1	0.0541946	0.0541946	5	5	2	0.0625	1
UniRef100_Q5HE15	68	205	47	160	59.1304	43.8356	1.12922	0.591103	1	0.0541946	0.0541946	33	28	11	6.61877e-05	0.0801433
UniRef100_A0A7U7ICB1	8	29	107	336	93.0435	7.94521	0.866258	0.842631	1	0.0542946	0.0542946	9	4	7	0.179688	1
UniRef100_C8CH29	2	0	113	365	1.73913	100	inf	0.0570198	1	0.0543946	0.0543946	2	2	0	0.5	0.5
UniRef100_UPI00044D425E	2	0	113	365	1.73913	100	inf	0.0570198	1	0.0544946	0.0544946	2	2	0	0.5	0.5
UniRef100_UPI000768DD02	2	0	113	365	1.73913	100	inf	0.0570198	1	0.0544946	0.0544946	2	2	0	0.5	0.5
UniRef100_UPI00065C1718	2	0	113	365	1.73913	100	inf	0.0570198	1	0.0544946	0.0544946	2	2	0	0.5	0.5
UniRef100_UPI00025F5223	2	0	113	365	1.73913	100	inf	0.0570198	1	0.0544946	0.0544946	2	2	0	0.5	0.5
UniRef100_UPI00024330F7	2	0	113	365	1.73913	100	inf	0.0570198	1	0.0544946	0.0544946	2	2	0	0.5	0.5
UniRef100_Q2YZ71	34	126	81	239	70.4348	34.5205	0.796198	0.364834	1	0.0545945	0.0545945	9	9	3	0.00390625	0.507812
UniRef100_A0A641A7H5	11	48	104	317	90.4348	13.1507	0.698518	0.415062	1	0.0545945	0.0545945	4	2	4	0.125	1
UniRef100_A7X2X2	32	97	83	268	27.8261	73.4247	1.06521	0.809889	1	0.0546945	0.0546945	9	8	6	0.0390625	0.507812
UniRef100_A0A0E1VQG5	16	44	99	321	13.913	87.9452	1.17906	0.628221	1	0.0547945	0.0547945	9	9	2	0.00390625	0.179688
UniRef100_A0A9P1SCH4	10	37	105	328	91.3043	10.137	0.844273	0.722246	1	0.0547945	0.0547945	3	1	3	0.25	1
UniRef100_A0A0E1X4H1	12	37	103	328	10.4348	89.863	1.0328	1	1	0.0547945	0.0547945	3	1	3	0.25	1
UniRef100_A0A9Q4MF10	17	43	98	322	14.7826	88.2192	1.299	0.419603	1	0.0548945	0.0548945	3	1	3	0.25	1
UniRef100_A0A2X3RDT0	2	0	113	365	1.73913	100	inf	0.0570198	1	0.0552945	0.0552945	2	2	0	0.5	0.5
UniRef100_A0A2X2KN85	2	0	113	365	1.73913	100	inf	0.0570198	1	0.0552945	0.0552945	2	2	0	0.5	0.5
UniRef100_A0A9N8NNJ0	2	0	113	365	1.73913	100	inf	0.0570198	1	0.0552945	0.0552945	2	2	0	0.5	0.5
UniRef100_UPI000243209A	4	6	111	359	3.47826	98.3562	2.15616	0.261055	1	0.0552945	0.0552945	3	3	3	0.25	0.25
UniRef100_Q93KF4	9	27	106	338	7.82609	92.6027	1.06289	0.84116	1	0.0552945	0.0552945	8	5	7	0.0703125	0.726562
UniRef100_A0A0K6TWB5	22	55	93	310	19.1304	84.9315	1.33333	0.309532	1	0.0553945	0.0553945	17	10	10	0.629059	0.629059
UniRef100_UPI0004BABBD6	2	0	113	365	1.73913	100	inf	0.0570198	1	0.0554945	0.0554945	2	2	0	0.5	0.5
UniRef100_UPI000197AB1E	2	0	113	365	1.73913	100	inf	0.0570198	1	0.0556944	0.0556944	2	2	0	0.5	0.5
UniRef100_UPI000A6228EC	2	0	113	365	1.73913	100	inf	0.0570198	1	0.0556944	0.0556944	2	2	0	0.5	0.5
UniRef100_UPI000A7D0C65	2	0	113	365	1.73913	100	inf	0.0570198	1	0.0556944	0.0556944	2	2	0	0.5	0.5
UniRef100_UPI0007CA38ED	2	0	113	365	1.73913	100	inf	0.0570198	1	0.0556944	0.0556944	2	2	0	0.5	0.5
UniRef100_UPI00024C3419	2	0	113	365	1.73913	100	inf	0.0570198	1	0.0556944	0.0556944	2	2	0	0.5	0.5
UniRef100_P63858	11	31	104	334	9.56522	91.5068	1.13958	0.707459	1	0.0556944	0.0556944	3	1	3	0.25	1
UniRef100_A0A0E1VLQ5	28	88	87	277	24.3478	75.8904	1.01306	1	1	0.0556944	0.0556944	10	6	7	0.34375	0.753906
UniRef100_A0A513ZY11	2	0	113	365	1.73913	100	inf	0.0570198	1	0.0558944	0.0558944	2	2	0	0.5	0.5
UniRef100_A0A513ZY09	2	0	113	365	1.73913	100	inf	0.0570198	1	0.0558944	0.0558944	2	2	0	0.5	0.5
UniRef100_A0A513ZXX7	2	0	113	365	1.73913	100	inf	0.0570198	1	0.0558944	0.0558944	2	2	0	0.5	0.5
UniRef100_A0A513ZXW2	2	0	113	365	1.73913	100	inf	0.0570198	1	0.0558944	0.0558944	2	2	0	0.5	0.5
UniRef100_A0A9N8NJV7	2	0	113	365	1.73913	100	inf	0.0570198	1	0.0558944	0.0558944	2	2	0	0.5	0.5
UniRef100_UPI000447DC26	2	0	113	365	1.73913	100	inf	0.0570198	1	0.0558944	0.0558944	2	2	0	0.5	0.5
UniRef100_A0A513ZXU8	2	0	113	365	1.73913	100	inf	0.0570198	1	0.0558944	0.0558944	2	2	0	0.5	0.5
UniRef100_A0A513ZXU3	2	0	113	365	1.73913	100	inf	0.0570198	1	0.0558944	0.0558944	2	2	0	0.5	0.5
UniRef100_A0A513ZXV6	2	0	113	365	1.73913	100	inf	0.0570198	1	0.0558944	0.0558944	2	2	0	0.5	0.5
UniRef100_Q2FHJ7	100	334	15	31	13.0435	91.5068	0.618762	0.149899	1	0.0558944	0.0558944	3	1	3	0.25	1
UniRef100_A0A9N8FCB1	12	57	103	308	89.5652	15.6164	0.629535	0.221983	1	0.0558944	0.0558944	3	1	3	0.25	1
UniRef100_T1Y6S4	25	94	90	271	78.2609	25.7534	0.800827	0.457612	1	0.0558944	0.0558944	5	3	5	0.0625	1
UniRef100_UPI00021AE00F	2	0	113	365	1.73913	100	inf	0.0570198	1	0.0562944	0.0562944	2	2	0	0.5	0.5
UniRef100_UPI00021AE00C	2	0	113	365	1.73913	100	inf	0.0570198	1	0.0562944	0.0562944	2	2	0	0.5	0.5
UniRef100_UPI0001C0B4A8	2	0	113	365	1.73913	100	inf	0.0570198	1	0.0562944	0.0562944	2	2	0	0.5	0.5
UniRef100_A0A0C6E410	2	0	113	365	1.73913	100	inf	0.0570198	1	0.0562944	0.0562944	2	2	0	0.5	0.5
UniRef100_A0A0E1VNG3	10	44	105	321	91.3043	12.0548	0.694805	0.398215	1	0.0562944	0.0562944	3	1	3	0.25	1
UniRef100_A0A166KNC3	12	37	103	328	10.4348	89.863	1.0328	1	1	0.0562944	0.0562944	3	1	3	0.25	1
UniRef100_UPI0015E8DCD8	2	0	113	365	1.73913	100	inf	0.0570198	1	0.0563944	0.0563944	2	2	0	0.5	0.5
UniRef100_A0A6I2KK99	12	37	103	328	10.4348	89.863	1.0328	1	1	0.0563944	0.0563944	3	1	3	0.25	1
UniRef100_A0A0Y9Z2T5	12	37	103	328	10.4348	89.863	1.0328	1	1	0.0563944	0.0563944	3	1	3	0.25	1
UniRef100_UPI000768F0CD	2	0	113	365	1.73913	100	inf	0.0570198	1	0.0565943	0.0565943	2	2	0	0.5	0.5
UniRef100_UPI0005DA7D20	2	0	113	365	1.73913	100	inf	0.0570198	1	0.0565943	0.0565943	2	2	0	0.5	0.5
UniRef100_UPI00021AE8B9	2	0	113	365	1.73913	100	inf	0.0570198	1	0.0565943	0.0565943	2	2	0	0.5	0.5
UniRef100_A0A380E0E7	2	0	113	365	1.73913	100	inf	0.0570198	1	0.0565943	0.0565943	2	2	0	0.5	0.5
UniRef100_A0A390XYE0	14	27	101	338	12.1739	92.6027	1.73524	0.125775	1	0.0565943	0.0565943	11	9	3	0.0654297	0.226562
UniRef100_A0A9Q4MDS0	17	43	98	322	14.7826	88.2192	1.299	0.419603	1	0.0565943	0.0565943	3	1	3	0.25	1
UniRef100_A0A9N8NS00	11	32	104	333	9.56522	91.2329	1.10066	0.85153	1	0.0565943	0.0565943	10	6	7	0.34375	0.753906
UniRef100_A0A068A8V7	7	7	108	358	6.08696	98.0822	3.31481	0.0490478	1	0.0566943	0.0566943	12	6	6	1	1
UniRef100_UPI0005DCF16D	2	0	113	365	1.73913	100	inf	0.0570198	1	0.0566943	0.0566943	2	2	0	0.5	0.5
UniRef100_UPI0005E5CCE0	2	0	113	365	1.73913	100	inf	0.0570198	1	0.0566943	0.0566943	2	2	0	0.5	0.5
UniRef100_UPI0005E7809C	2	0	113	365	1.73913	100	inf	0.0570198	1	0.0566943	0.0566943	2	2	0	0.5	0.5
UniRef100_A0A380EP37	2	0	113	365	1.73913	100	inf	0.0570198	1	0.0567943	0.0567943	2	2	0	0.5	0.5
UniRef100_Q7A7F8	28	75	87	290	24.3478	79.4521	1.24444	0.434486	1	0.0567943	0.0567943	11	11	4	0.000976562	0.548828
UniRef100_A0A9N8IDP6	20	38	95	327	17.3913	89.589	1.81163	0.0500928	1	0.0568943	0.0568943	8	8	2	0.0078125	0.289062
UniRef100_UPI000452E85F	2	0	113	365	1.73913	100	inf	0.0570198	1	0.0568943	0.0568943	2	2	0	0.5	0.5
UniRef100_UPI0002CCB754	2	0	113	365	1.73913	100	inf	0.0570198	1	0.0568943	0.0568943	2	2	0	0.5	0.5
UniRef100_T1YAJ6	15	37	100	328	13.0435	89.863	1.32973	0.391586	1	0.0568943	0.0568943	19	11	10	0.647606	1
UniRef100_Q6GHN2	10	28	105	337	8.69565	92.3288	1.14626	0.695356	1	0.0568943	0.0568943	6	4	5	0.21875	0.6875
UniRef100_A0A2Z4WNG6	2	0	113	365	1.73913	100	inf	0.0570198	1	0.0569943	0.0569943	2	2	0	0.5	0.5
UniRef100_A0A9Q3MU95	10	39	105	326	91.3043	10.6849	0.796093	0.60061	1	0.0569943	0.0569943	3	1	3	0.25	1
UniRef100_A0A9Q4QR33	18	51	97	314	15.6522	86.0274	1.14251	0.649404	1	0.0569943	0.0569943	4	2	4	0.125	1
UniRef100_A0A0U1MGK2	12	59	103	306	89.5652	16.1644	0.604246	0.174369	1	0.0570943	0.0570943	3	1	3	0.25	1
UniRef100_A0A3A5LBF0	32	116	83	249	72.1739	31.7808	0.827586	0.487484	1	0.0570943	0.0570943	11	7	9	0.0654297	0.548828
UniRef100_A0A9Q4YM50	21	49	94	316	18.2609	86.5753	1.44073	0.22534	1	0.0571943	0.0571943	4	2	4	0.125	1
UniRef100_A0A0E0VMA4	27	104	88	261	76.5217	28.4932	0.769996	0.337357	1	0.0571943	0.0571943	9	6	8	0.0390625	0.507812
UniRef100_Q6GIK4	2	0	113	365	1.73913	100	inf	0.0570198	1	0.0573943	0.0573943	2	2	0	0.5	0.5
UniRef100_UPI0004534F8D	2	0	113	365	1.73913	100	inf	0.0570198	1	0.0573943	0.0573943	2	2	0	0.5	0.5
UniRef100_A0A0E8GPH7	6	17	109	348	5.21739	95.3425	1.12682	0.803907	1	0.0573943	0.0573943	4	1	3	0.625	0.625
UniRef100_A0A0U1MI28	16	59	99	306	86.087	16.1644	0.838213	0.659186	1	0.0574943	0.0574943	3	3	1	0.25	1
UniRef100_A0A6G4QEM2	2	0	113	365	1.73913	100	inf	0.0570198	1	0.0575942	0.0575942	2	2	0	0.5	0.5
UniRef100_UPI0005E1CB8C	2	0	113	365	1.73913	100	inf	0.0570198	1	0.0575942	0.0575942	2	2	0	0.5	0.5
UniRef100_UPI00044D8C6C	2	0	113	365	1.73913	100	inf	0.0570198	1	0.0576942	0.0576942	2	2	0	0.5	0.5
UniRef100_A7X4M5	88	276	27	89	76.5217	24.3836	1.05099	0.900995	1	0.0576942	0.0576942	33	29	7	1.09286e-05	0.00131873
UniRef100_A0A7Z7W238	12	37	103	328	10.4348	89.863	1.0328	1	1	0.0576942	0.0576942	3	1	3	0.25	1
UniRef100_Q6GGU4	12	37	103	328	10.4348	89.863	1.0328	1	1	0.0576942	0.0576942	3	1	3	0.25	1
UniRef100_A0A9Q7Y1L0	6	28	109	337	94.7826	7.67123	0.662516	0.531313	1	0.0577942	0.0577942	10	3	7	0.34375	0.34375
UniRef100_Q599I6	2	0	113	365	1.73913	100	inf	0.0570198	1	0.0578942	0.0578942	2	2	0	0.5	0.5
UniRef100_A0A2S6DD55	2	24	113	341	98.2609	6.57534	0.251475	0.0564094	1	0.0580942	0.0580942	3	1	3	0.25	1
UniRef100_B6V393	2	0	113	365	1.73913	100	inf	0.0570198	1	0.0580942	0.0580942	2	2	0	0.5	0.5
UniRef100_A0A0D6GLZ1	13	30	102	335	11.3043	91.7808	1.4232	0.348904	1	0.0580942	0.0580942	8	7	5	0.0703125	0.726562
UniRef100_UPI000B2CCBF9	2	0	113	365	1.73913	100	inf	0.0570198	1	0.0581942	0.0581942	2	2	0	0.5	0.5
UniRef100_UPI0004534C64	2	0	113	365	1.73913	100	inf	0.0570198	1	0.0581942	0.0581942	2	2	0	0.5	0.5
UniRef100_Q4ZBX4	2	0	113	365	1.73913	100	inf	0.0570198	1	0.0581942	0.0581942	2	2	0	0.5	0.5
UniRef100_A0A0U1MP86	10	54	105	311	91.3043	14.7945	0.548501	0.115185	1	0.0581942	0.0581942	8	3	5	0.726562	0.726562
UniRef100_UPI000449A547	2	0	113	365	1.73913	100	inf	0.0570198	1	0.0582942	0.0582942	2	2	0	0.5	0.5
UniRef100_A0A7U7EWT7	11	31	104	334	9.56522	91.5068	1.13958	0.707459	1	0.0582942	0.0582942	3	1	3	0.25	1
UniRef100_UPI0006403E37	2	0	113	365	1.73913	100	inf	0.0570198	1	0.0583942	0.0583942	2	2	0	0.5	0.5
UniRef100_UPI0007CA6638	2	0	113	365	1.73913	100	inf	0.0570198	1	0.0583942	0.0583942	2	2	0	0.5	0.5
UniRef100_A0A0H2WY08	4	17	111	348	96.5217	4.65753	0.737679	0.794739	1	0.0583942	0.0583942	16	3	15	0.000518799	0.0212708
UniRef100_UPI000D742EEE	2	0	113	365	1.73913	100	inf	0.0570198	1	0.0584942	0.0584942	2	2	0	0.5	0.5
UniRef100_A0A899IQ25	2	0	113	365	1.73913	100	inf	0.0570198	1	0.0584942	0.0584942	2	2	0	0.5	0.5
UniRef100_A0A9Q4MDS3	8	27	107	338	93.0435	7.39726	0.935964	1	1	0.0584942	0.0584942	3	1	3	0.25	1
UniRef100_UPI0005C451F7	2	0	113	365	1.73913	100	inf	0.0570198	1	0.0585941	0.0585941	2	2	0	0.5	0.5
UniRef100_A0A8E4QK60	2	0	113	365	1.73913	100	inf	0.0570198	1	0.0585941	0.0585941	2	2	0	0.5	0.5
UniRef100_A0A8E4QK53	2	0	113	365	1.73913	100	inf	0.0570198	1	0.0585941	0.0585941	2	2	0	0.5	0.5
UniRef100_UPI0005C63A70	2	0	113	365	1.73913	100	inf	0.0570198	1	0.0585941	0.0585941	2	2	0	0.5	0.5
UniRef100_UPI0005C72283	2	0	113	365	1.73913	100	inf	0.0570198	1	0.0585941	0.0585941	2	2	0	0.5	0.5
UniRef100_UPI0005C78D4B	2	0	113	365	1.73913	100	inf	0.0570198	1	0.0585941	0.0585941	2	2	0	0.5	0.5
UniRef100_A0A8E4QK76	2	0	113	365	1.73913	100	inf	0.0570198	1	0.0585941	0.0585941	2	2	0	0.5	0.5
UniRef100_UPI0005C48DEA	2	0	113	365	1.73913	100	inf	0.0570198	1	0.0585941	0.0585941	2	2	0	0.5	0.5
UniRef100_UPI0005C7A418	2	0	113	365	1.73913	100	inf	0.0570198	1	0.0585941	0.0585941	2	2	0	0.5	0.5
UniRef100_A0A9Q4YH55	10	19	105	346	8.69565	94.7945	1.73434	0.180622	1	0.0585941	0.0585941	5	5	4	0.0625	0.375
UniRef100_A0A0E1VI59	12	49	103	316	89.5652	13.4247	0.751337	0.520619	1	0.0585941	0.0585941	3	1	3	0.25	1
UniRef100_A0A6B5FMJ5	2	18	113	347	98.2609	4.93151	0.3412	0.182666	1	0.0586941	0.0586941	17	2	16	0.000274658	0.00234985
UniRef100_A0A9Q4U8Y0	12	59	103	306	89.5652	16.1644	0.604246	0.174369	1	0.0587941	0.0587941	3	1	3	0.25	1
UniRef100_A0A2C9TMN6	26	62	89	303	22.6087	83.0137	1.42769	0.213013	1	0.0587941	0.0587941	3	2	3	0.25	1
UniRef100_A0A0D1IP51	31	110	84	255	73.0435	30.137	0.855519	0.558375	1	0.0587941	0.0587941	14	5	12	0.0129395	0.42395
UniRef100_T1Y6T7	16	48	99	317	13.913	86.8493	1.06734	0.875147	1	0.0587941	0.0587941	7	6	4	0.125	1
UniRef100_A0A5Q2QJ53	32	79	83	286	27.8261	78.3562	1.39576	0.204331	1	0.0589941	0.0589941	5	3	5	0.0625	1
UniRef100_A0A659FL78	7	10	108	355	6.08696	97.2603	2.30093	0.142092	1	0.0590941	0.0590941	11	6	6	1	1
UniRef100_A0A9P1WIM2	10	39	105	326	91.3043	10.6849	0.796093	0.60061	1	0.0590941	0.0590941	3	1	3	0.25	1
UniRef100_UPI000A321379	2	0	113	365	1.73913	100	inf	0.0570198	1	0.0591941	0.0591941	2	2	0	0.5	0.5
UniRef100_UPI000207C3AC	2	0	113	365	1.73913	100	inf	0.0570198	1	0.0591941	0.0591941	2	2	0	0.5	0.5
UniRef100_UPI000449BCA7	2	0	113	365	1.73913	100	inf	0.0570198	1	0.0592941	0.0592941	2	2	0	0.5	0.5
UniRef100_A7WXZ2	11	31	104	334	9.56522	91.5068	1.13958	0.707459	1	0.0592941	0.0592941	3	1	3	0.25	1
UniRef100_A0A162FF95	12	37	103	328	10.4348	89.863	1.0328	1	1	0.0592941	0.0592941	3	1	3	0.25	1
UniRef100_A0A7Z7QZE7	12	37	103	328	10.4348	89.863	1.0328	1	1	0.0592941	0.0592941	3	1	3	0.25	1
UniRef100_A0A0E1VXQ0	10	44	105	321	91.3043	12.0548	0.694805	0.398215	1	0.0593941	0.0593941	3	1	3	0.25	1
UniRef100_UPI0002F27831	10	44	105	321	91.3043	12.0548	0.694805	0.398215	1	0.0594941	0.0594941	3	1	3	0.25	1
UniRef100_X5EHY0	83	247	32	118	72.1739	32.3288	1.23912	0.419637	1	0.0594941	0.0594941	26	24	6	1.04904e-05	0.00935531
UniRef100_A7X3N2	25	68	90	297	21.7391	81.3699	1.21324	0.499031	1	0.0594941	0.0594941	4	2	4	0.125	1
UniRef100_A0A7U7EZB3	25	63	90	302	21.7391	82.7397	1.33157	0.272757	1	0.059594	0.059594	8	8	6	0.0078125	0.289062
UniRef100_A0A389PV73	11	31	104	334	9.56522	91.5068	1.13958	0.707459	1	0.059594	0.059594	3	1	3	0.25	1
UniRef100_A0A3A5LSJ0	11	31	104	334	9.56522	91.5068	1.13958	0.707459	1	0.059594	0.059594	3	1	3	0.25	1
UniRef100_UPI00024C322B	2	0	113	365	1.73913	100	inf	0.0570198	1	0.059794	0.059794	2	2	0	0.5	0.5
UniRef100_A0A0U1MSI8	12	59	103	306	89.5652	16.1644	0.604246	0.174369	1	0.060094	0.060094	3	1	3	0.25	1
UniRef100_A0A0H3KE63	2	0	113	365	1.73913	100	inf	0.0570198	1	0.060194	0.060194	2	2	0	0.5	0.5
UniRef100_A0A7X3FA96	2	0	113	365	1.73913	100	inf	0.0570198	1	0.060194	0.060194	2	2	0	0.5	0.5
UniRef100_UPI00044DD478	2	0	113	365	1.73913	100	inf	0.0570198	1	0.060194	0.060194	2	2	0	0.5	0.5
UniRef100_UPI00049385A0	2	0	113	365	1.73913	100	inf	0.0570198	1	0.060194	0.060194	2	2	0	0.5	0.5
UniRef100_A0A0H3K638	2	0	113	365	1.73913	100	inf	0.0570198	1	0.060194	0.060194	2	2	0	0.5	0.5
UniRef100_A0A9Q4MDZ9	17	43	98	322	14.7826	88.2192	1.299	0.419603	1	0.060294	0.060294	3	1	3	0.25	1
UniRef100_A0A2S6DLA3	2	24	113	341	98.2609	6.57534	0.251475	0.0564094	1	0.060494	0.060494	3	1	3	0.25	1
UniRef100_A0A0E0VME5	81	233	34	132	70.4348	36.1644	1.34966	0.216914	1	0.0605939	0.0605939	19	18	7	7.62939e-05	0.359283
UniRef100_A0A517IV35	2	0	113	365	1.73913	100	inf	0.0570198	1	0.0609939	0.0609939	2	2	0	0.5	0.5
UniRef100_M1T308	5	5	110	360	4.34783	98.6301	3.27273	0.0645055	1	0.0610939	0.0610939	10	5	5	1	1
UniRef100_A0A9N8I2T4	11	54	104	311	90.4348	14.7945	0.609152	0.163473	1	0.0610939	0.0610939	6	3	4	0.6875	1
UniRef100_A0A390B4Y6	9	25	106	340	7.82609	93.1507	1.15472	0.681393	1	0.0611939	0.0611939	3	1	3	0.25	1
UniRef100_UPI0005BD87B5	2	3	113	362	1.73913	99.1781	2.13569	0.597703	1	0.0612939	0.0612939	2	2	1	0.5	1
UniRef100_UPI00024C3528	2	3	113	362	1.73913	99.1781	2.13569	0.597703	1	0.0612939	0.0612939	2	2	1	0.5	1
UniRef100_A0A0E1VLI7	9	42	106	323	92.1739	11.5068	0.652965	0.301857	1	0.0613939	0.0613939	9	4	6	0.507812	1
UniRef100_UPI000207CBD9	4	12	111	353	3.47826	96.7123	1.06006	1	1	0.0613939	0.0613939	4	4	4	0.125	0.125
UniRef100_UPI00021AE2BE	3	2	112	363	2.6087	99.4521	4.86161	0.0917489	1	0.0616938	0.0616938	3	3	1	0.25	1
UniRef100_UPI001400D447	7	14	108	351	6.08696	96.1644	1.625	0.301834	1	0.0621938	0.0621938	11	7	4	0.548828	0.548828
UniRef100_UPI0024589FF2	5	10	110	355	4.34783	97.2603	1.61364	0.368006	1	0.0622938	0.0622938	4	4	3	0.125	0.625
UniRef100_T1YC50	22	63	93	302	19.1304	82.7397	1.13398	0.674858	1	0.0625937	0.0625937	14	12	9	0.0129395	0.42395
UniRef100_Q6G5Z1	3	7	112	358	2.6087	98.0822	1.3699	0.708804	1	0.0626937	0.0626937	3	3	2	0.25	1
UniRef100_A0A9Q7L5D5	4	3	111	362	3.47826	99.1781	4.34835	0.0599568	1	0.0627937	0.0627937	7	4	3	1	1
UniRef100_A0A6B5TTJ2	7	14	108	351	6.08696	96.1644	1.625	0.301834	1	0.0630937	0.0630937	6	6	5	0.03125	0.21875
UniRef100_C8CH24	81	246	34	119	70.4348	32.6027	1.15244	0.568113	1	0.0632937	0.0632937	38	30	12	0.000471987	0.0335524
UniRef100_A0A641AA18	21	64	94	301	18.2609	82.4658	1.0507	0.888798	1	0.0634937	0.0634937	8	8	4	0.0078125	1
UniRef100_A6U2D1	41	115	74	250	35.6522	68.4932	1.20447	0.425358	1	0.0635936	0.0635936	15	14	5	0.000976562	0.301758
UniRef100_A0A513ZXW7	4	3	111	362	3.47826	99.1781	4.34835	0.0599568	1	0.0636936	0.0636936	7	4	3	1	1
UniRef100_A0A9N8IMR9	3	2	112	363	2.6087	99.4521	4.86161	0.0917489	1	0.0637936	0.0637936	4	3	2	0.625	1
UniRef100_D2J8F4	9	13	106	352	7.82609	96.4384	2.29898	0.0718839	1	0.0639936	0.0639936	6	5	3	0.21875	1
UniRef100_A0A390QMX5	6	26	109	339	94.7826	7.12329	0.717713	0.667924	1	0.0639936	0.0639936	5	3	5	0.0625	1
UniRef100_UPI000B1084F6	2	2	113	363	1.73913	99.4521	3.21239	0.243777	1	0.0640936	0.0640936	3	2	2	1	1
UniRef100_UPI000A78E2BA	2	2	113	363	1.73913	99.4521	3.21239	0.243777	1	0.0640936	0.0640936	3	2	2	1	1
UniRef100_A0A9Q3R3A0	10	33	105	332	91.3043	9.0411	0.958153	1	1	0.0642936	0.0642936	3	2	3	0.25	1
UniRef100_Q6GEA5	12	24	103	341	10.4348	93.4247	1.65534	0.221174	1	0.0644936	0.0644936	7	7	2	0.015625	0.453125
UniRef100_UPI00031A1DB8	10	25	105	340	8.69565	93.1507	1.29524	0.537894	1	0.0644936	0.0644936	12	10	3	0.0385742	0.145996
UniRef100_W8UT95	22	71	93	294	80.8696	19.4521	0.979555	1	1	0.0646935	0.0646935	7	2	7	0.015625	0.453125
UniRef100_A0A2C9TMJ2	6	19	109	346	5.21739	94.7945	1.00241	1	1	0.0646935	0.0646935	3	1	3	0.25	1
UniRef100_A0A2U0IGZ8	6	5	109	360	5.21739	98.6301	3.9633	0.0265812	1	0.0648935	0.0648935	9	5	5	1	1
UniRef100_A0A390WCR0	13	34	102	331	11.3043	90.6849	1.24077	0.58925	1	0.0649935	0.0649935	6	3	5	0.21875	1
UniRef100_A0A113JPG9	5	5	110	360	4.34783	98.6301	3.27273	0.0645055	1	0.0650935	0.0650935	10	5	5	1	1
UniRef100_A0A9P3Y8J6	6	9	109	356	5.21739	97.5342	2.17737	0.213463	1	0.0651935	0.0651935	11	6	6	1	1
UniRef100_T1YDT0	7	14	108	351	6.08696	96.1644	1.625	0.301834	1	0.0651935	0.0651935	7	6	6	0.125	0.125
UniRef100_A0A9N8FB29	11	55	104	310	90.4348	15.0685	0.596154	0.162516	1	0.0653935	0.0653935	5	2	4	0.375	1
UniRef100_A0A389V7Z3	14	30	101	335	12.1739	91.7808	1.54785	0.198964	1	0.0653935	0.0653935	6	6	2	0.03125	0.6875
UniRef100_A0A133PUZ4	7	17	108	348	6.08696	95.3425	1.3268	0.623126	1	0.0653935	0.0653935	5	5	3	0.0625	1
UniRef100_UPI0004490CD9	3	2	112	363	2.6087	99.4521	4.86161	0.0917489	1	0.0654935	0.0654935	4	3	1	0.625	0.625
UniRef100_A0A9P1SC38	9	37	106	328	92.1739	10.137	0.752677	0.586268	1	0.0656934	0.0656934	5	2	4	0.375	1
UniRef100_A0A0E1X980	2	15	113	350	98.2609	4.10959	0.412979	0.383924	1	0.0659934	0.0659934	15	2	14	0.000976562	0.00738525
UniRef100_UPI0002B0F6B2	3	2	112	363	2.6087	99.4521	4.86161	0.0917489	1	0.0660934	0.0660934	4	3	2	0.625	1
UniRef100_Q99VX6	17	35	98	330	14.7826	90.411	1.63557	0.123709	1	0.0661934	0.0661934	7	7	3	0.015625	1
UniRef100_A0A090M279	14	63	101	302	87.8261	17.2603	0.664466	0.243577	1	0.0661934	0.0661934	8	3	7	0.0703125	0.726562
UniRef100_Q6GEZ7	8	29	107	336	93.0435	7.94521	0.866258	0.842631	1	0.0661934	0.0661934	8	5	6	0.289062	0.726562
UniRef100_A0A8F8WG47	5	17	110	348	95.6522	4.65753	0.930481	1	1	0.0661934	0.0661934	7	5	3	0.453125	1
UniRef100_A0A0U1MSE9	12	57	103	308	89.5652	15.6164	0.629535	0.221983	1	0.0662934	0.0662934	4	2	3	0.625	1
UniRef100_T1Y6V6	10	41	105	324	91.3043	11.2329	0.752613	0.492641	1	0.0663934	0.0663934	9	5	6	0.507812	1
UniRef100_A0A9Q7Y0F7	9	37	106	328	92.1739	10.137	0.752677	0.586268	1	0.0663934	0.0663934	5	2	4	0.375	1
UniRef100_Q6GIR8	11	35	104	330	90.4348	9.58904	0.997253	1	1	0.0663934	0.0663934	5	2	4	0.375	1
UniRef100_A0A9Q4QR25	28	85	87	280	24.3478	76.7123	1.06018	0.802228	1	0.0667933	0.0667933	6	4	5	0.21875	0.6875
UniRef100_A0A0E1X6Z9	11	35	104	330	90.4348	9.58904	0.997253	1	1	0.0668933	0.0668933	5	3	4	0.375	1
UniRef100_A0A9Q4QQV7	16	41	99	324	13.913	88.7671	1.27716	0.508241	1	0.0669933	0.0669933	5	2	4	0.375	1
UniRef100_A0A7U7EWV0	11	32	104	333	9.56522	91.2329	1.10066	0.85153	1	0.0670933	0.0670933	4	2	4	0.125	1
UniRef100_Q99WP2	10	29	105	336	8.69565	92.0548	1.10345	0.844979	1	0.0671933	0.0671933	5	3	4	0.375	1
UniRef100_UPI00044EDFAB	4	3	111	362	3.47826	99.1781	4.34835	0.0599568	1	0.0672933	0.0672933	7	4	3	1	1
UniRef100_A0A2X3Q0I1	10	21	105	344	8.69565	94.2466	1.56009	0.278354	1	0.0672933	0.0672933	7	6	5	0.125	0.453125
UniRef100_A0A9P3DMJ2	11	31	104	334	9.56522	91.5068	1.13958	0.707459	1	0.0672933	0.0672933	5	2	5	0.0625	1
UniRef100_A0A7Z7W1W1	10	33	105	332	91.3043	9.0411	0.958153	1	1	0.0672933	0.0672933	8	4	6	0.289062	1
UniRef100_C8CH26	75	212	40	153	65.2174	41.9178	1.35318	0.191356	1	0.0674933	0.0674933	41	31	15	0.00145049	0.117275
UniRef100_A0A6G7QQ13	4	25	111	340	96.5217	6.84932	0.49009	0.261257	1	0.0674933	0.0674933	11	4	9	0.0654297	0.548828
UniRef100_A0A6K1LZM7	31	81	84	284	26.9565	77.8082	1.29394	0.31252	1	0.0674933	0.0674933	10	9	4	0.0214844	0.753906
UniRef100_A0A0B4NDF2	36	99	79	266	31.3043	72.8767	1.2244	0.405984	1	0.0675932	0.0675932	19	12	13	0.167068	0.359283
UniRef100_A0A224B4K8	3	12	112	353	97.3913	3.28767	0.787946	1	1	0.0677932	0.0677932	4	3	2	0.625	1
UniRef100_A0A9Q3MRQ0	7	34	108	331	93.913	9.31507	0.630991	0.341547	1	0.0679932	0.0679932	7	3	5	0.453125	1
UniRef100_A0A7Z7QXN6	11	35	104	330	90.4348	9.58904	0.997253	1	1	0.0679932	0.0679932	5	2	4	0.375	1
UniRef100_X5IAA5	4	35	111	330	96.5217	9.58904	0.339768	0.0481522	1	0.0680932	0.0680932	9	4	7	0.179688	1
UniRef100_A0A0H1ZU59	13	38	102	327	11.3043	89.589	1.09675	0.862241	1	0.0680932	0.0680932	26	6	22	0.000533521	0.00935531
UniRef100_UPI00069C0D86	4	12	111	353	3.47826	96.7123	1.06006	1	1	0.0680932	0.0680932	4	1	4	0.125	0.625
UniRef100_A0A0U1MK35	12	59	103	306	89.5652	16.1644	0.604246	0.174369	1	0.0683932	0.0683932	3	1	3	0.25	1
UniRef100_UPI0002C9C102	11	34	104	331	9.56522	90.6849	1.02969	1	1	0.0683932	0.0683932	15	7	9	0.607239	1
UniRef100_A0A389V698	11	32	104	333	9.56522	91.2329	1.10066	0.85153	1	0.0684932	0.0684932	4	2	4	0.125	1
UniRef100_A0A380EMB4	56	186	59	179	51.3043	50.9589	0.913432	0.748445	1	0.0685931	0.0685931	16	15	7	0.000518799	0.803619
UniRef100_A0A0E0VLY4	41	125	74	240	35.6522	65.7534	1.06378	0.822342	1	0.0686931	0.0686931	13	9	10	0.0922852	0.266846
UniRef100_A0A113SXS8	4	3	111	362	3.47826	99.1781	4.34835	0.0599568	1	0.0688931	0.0688931	7	4	3	1	1
UniRef100_A0A9Q4M9R2	17	49	98	316	14.7826	86.5753	1.1187	0.756342	1	0.0688931	0.0688931	5	2	4	0.375	1
UniRef100_A9CRC6	4	1	111	364	3.47826	99.726	13.1171	0.0128728	1	0.0692931	0.0692931	4	3	1	0.625	0.625
UniRef100_A0A9Q4UZJ2	7	12	108	353	6.08696	96.7123	1.90664	0.178896	1	0.0692931	0.0692931	4	4	3	0.125	0.625
UniRef100_A0A9Q7Y285	20	66	95	299	82.6087	18.0822	0.953748	1	1	0.069693	0.069693	6	5	3	0.21875	1
UniRef100_A7X569	42	127	73	238	36.5217	65.2055	1.0782	0.738168	1	0.069793	0.069793	18	12	14	0.0308838	0.237885
UniRef100_Q5HEA0	65	201	50	164	56.5217	44.9315	1.0607	0.829984	1	0.069893	0.069893	13	8	9	0.266846	0.581055
UniRef100_A0A380DP26	28	77	87	288	24.3478	78.9041	1.20376	0.517823	1	0.069993	0.069993	8	7	3	0.0703125	0.726562
UniRef100_A0A9Q4QQG1	17	47	98	318	14.7826	87.1233	1.17369	0.637338	1	0.069993	0.069993	6	3	5	0.21875	1
UniRef100_Q6GDR0	11	35	104	330	90.4348	9.58904	0.997253	1	1	0.070093	0.070093	5	3	4	0.375	1
UniRef100_A0A0U1MHV8	18	46	97	319	15.6522	87.3973	1.28687	0.431964	1	0.070193	0.070193	19	13	9	0.167068	1
UniRef100_Q99SM8	7	9	108	356	6.08696	97.5342	2.56379	0.0734777	1	0.070493	0.070493	10	6	6	0.753906	0.753906
UniRef100_Q2FW71	25	63	90	302	21.7391	82.7397	1.33157	0.272757	1	0.0705929	0.0705929	5	3	4	0.375	1
UniRef100_A0A0H3JKV9	114	354	1	11	99.1304	3.0137	3.54237	0.309308	1	0.0705929	0.0705929	10	10	1	0.00195312	0.0214844
UniRef100_Q2FET8	101	315	14	50	87.8261	13.6986	1.14512	0.754527	1	0.0705929	0.0705929	16	15	2	0.000518799	0.00418091
UniRef100_A0A4T9Z9Z3	21	68	94	297	81.7391	18.6301	0.975751	1	1	0.0706929	0.0706929	24	13	16	0.15159	0.83882
UniRef100_A0A0D6HPC7	46	122	69	243	40	66.5753	1.32787	0.217879	1	0.0707929	0.0707929	13	8	9	0.266846	0.581055
UniRef100_A0A0H2G925	13	32	102	333	11.3043	91.2329	1.32629	0.462856	1	0.0707929	0.0707929	8	6	3	0.289062	0.726562
UniRef100_A0A659IC53	10	29	105	336	8.69565	92.0548	1.10345	0.844979	1	0.0708929	0.0708929	9	8	8	0.0390625	0.0390625
UniRef100_Q2FEZ8	21	49	94	316	18.2609	86.5753	1.44073	0.22534	1	0.0710929	0.0710929	8	8	4	0.0078125	1
UniRef100_Q60250	10	13	105	352	8.69565	96.4384	2.57875	0.0411846	1	0.0715928	0.0715928	11	7	6	0.548828	1
UniRef100_A0A7Z8DCH3	40	116	75	249	34.7826	68.2192	1.14483	0.569095	1	0.0716928	0.0716928	12	8	10	0.0385742	0.387695
UniRef100_A0A9Q4MDG8	14	37	101	328	12.1739	89.863	1.22879	0.602519	1	0.0717928	0.0717928	9	4	6	0.507812	1
UniRef100_A0A0D1H789	38	122	77	243	66.9565	33.4247	0.982968	1	1	0.0717928	0.0717928	11	6	10	0.0117188	1
UniRef100_P0A0C8	2	10	113	355	98.2609	2.73973	0.628319	0.739461	1	0.0718928	0.0718928	9	2	9	0.00390625	0.179688
UniRef100_A0A380EDP4	15	37	100	328	13.0435	89.863	1.32973	0.391586	1	0.0719928	0.0719928	17	10	9	0.629059	1
UniRef100_Q4ZE71	11	38	104	327	90.4348	10.411	0.910172	0.861659	1	0.0721928	0.0721928	11	5	9	0.0654297	1
UniRef100_A0A7U7EZP0	86	269	29	96	74.7826	26.3014	1.05833	0.903153	1	0.0723928	0.0723928	17	17	8	1.52588e-05	1
UniRef100_Q6GF13	27	92	88	273	76.5217	25.2055	0.91045	0.804543	1	0.0725927	0.0725927	10	5	8	0.109375	1
UniRef100_A0A9Q8DK12	10	39	105	326	91.3043	10.6849	0.796093	0.60061	1	0.0727927	0.0727927	3	1	3	0.25	1
UniRef100_T1Y4U6	4	4	111	361	3.47826	98.9041	3.25225	0.0981084	1	0.0728927	0.0728927	3	3	2	0.25	1
UniRef100_A0A166LF53	13	58	102	307	88.6957	15.8904	0.674611	0.291391	1	0.0729927	0.0729927	7	3	5	0.453125	1
UniRef100_A0A659IB59	3	5	112	360	2.6087	98.6301	1.92857	0.404594	1	0.0729927	0.0729927	3	3	2	0.25	1
UniRef100_A7X669	48	143	67	222	41.7391	60.8219	1.1122	0.662589	1	0.0729927	0.0729927	18	10	13	0.0962524	0.814529
UniRef100_Q6G9A7	12	52	103	313	89.5652	14.2466	0.70127	0.346913	1	0.0731927	0.0731927	11	5	9	0.0654297	1
UniRef100_A0A0H2GM35	13	32	102	333	11.3043	91.2329	1.32629	0.462856	1	0.0732927	0.0732927	11	8	4	0.226562	0.548828
UniRef100_Q2FFW3	16	41	99	324	13.913	88.7671	1.27716	0.508241	1	0.0734927	0.0734927	10	8	6	0.109375	0.753906
UniRef100_UPI00024C2DB5	3	1	112	364	2.6087	99.726	9.75	0.0444233	1	0.0735926	0.0735926	3	3	1	0.25	1
UniRef100_UPI000241DF89	4	5	111	360	3.47826	98.6301	2.59459	0.227792	1	0.0737926	0.0737926	3	3	1	0.25	1
UniRef100_A0A518QTT5	21	60	94	305	18.2609	83.5616	1.13564	0.669191	1	0.0737926	0.0737926	8	7	5	0.0703125	0.726562
UniRef100_A0A2C9TU15	46	119	69	246	40	67.3973	1.37815	0.176489	1	0.0741926	0.0741926	10	7	8	0.109375	0.34375
UniRef100_A0A0E1VH22	17	55	98	310	85.2174	15.0685	0.977737	1	1	0.0741926	0.0741926	7	6	3	0.125	1
UniRef100_A0A0E1VGP7	13	43	102	322	88.6957	11.7808	0.9544	1	1	0.0741926	0.0741926	5	5	2	0.0625	1
UniRef100_A0A179DZU1	55	156	60	209	47.8261	57.2603	1.2281	0.388853	1	0.0743926	0.0743926	11	7	9	0.0654297	0.548828
UniRef100_A0A9Q7XZZ1	9	22	106	343	7.82609	93.9726	1.32376	0.515286	1	0.0743926	0.0743926	6	6	1	0.03125	0.21875
UniRef100_A0A9Q4UYV1	3	0	112	365	2.6087	100	inf	0.0134796	1	0.0744926	0.0744926	3	3	0	0.25	0.25
UniRef100_A0A9X9K178	0	11	115	354	100	3.0137	0	0.0739638	1	0.0746925	0.0746925	10	0	10	0.00195312	0.00195312
UniRef100_A0A9Q4MGB7	22	44	93	321	19.1304	87.9452	1.72581	0.0626583	1	0.0747925	0.0747925	4	4	2	0.125	1
UniRef100_A0A0C6DV42	7	45	108	320	93.913	12.3288	0.460905	0.0836644	1	0.0747925	0.0747925	17	5	14	0.0127258	0.143463
UniRef100_A0A9Q4UWP8	4	3	111	362	3.47826	99.1781	4.34835	0.0599568	1	0.0748925	0.0748925	7	4	3	1	1
UniRef100_G4KNU3	4	12	111	353	3.47826	96.7123	1.06006	1	1	0.0748925	0.0748925	4	1	4	0.125	0.625
UniRef100_A0A6B5GBF4	5	29	110	336	95.6522	7.94521	0.526646	0.217535	1	0.0749925	0.0749925	18	4	17	0.000144958	0.0308838
UniRef100_A0A0E1VVF1	10	47	105	318	91.3043	12.8767	0.644377	0.251624	1	0.0753925	0.0753925	10	5	7	0.34375	1
UniRef100_UPI00044A8682	4	3	111	362	3.47826	99.1781	4.34835	0.0599568	1	0.0756924	0.0756924	4	4	2	0.125	1
UniRef100_A0A9Q8DJS1	6	9	109	356	5.21739	97.5342	2.17737	0.213463	1	0.0756924	0.0756924	5	4	3	0.375	1
UniRef100_A0A454H1F0	2	19	113	346	98.2609	5.20548	0.32231	0.187358	1	0.0757924	0.0757924	4	2	3	0.625	1
UniRef100_A0A9Q7Y9D2	4	17	111	348	96.5217	4.65753	0.737679	0.794739	1	0.0758924	0.0758924	6	2	6	0.03125	0.6875
UniRef100_A0A9P2YXL7	5	19	110	346	95.6522	5.20548	0.827751	0.811202	1	0.0758924	0.0758924	16	4	15	0.000518799	0.0768127
UniRef100_Q7A3L2	10	27	105	338	8.69565	92.6027	1.19224	0.688812	1	0.0762924	0.0762924	3	1	3	0.25	1
UniRef100_A0A7U7IDY5	26	88	89	277	77.3913	24.1096	0.919561	0.802276	1	0.0763924	0.0763924	59	23	44	0.000203722	0.117477
UniRef100_E9LT78	1	1	114	364	0.869565	99.726	3.19298	0.422147	1	0.0765923	0.0765923	1	1	1	1	1
UniRef100_A0A641ACH2	22	63	93	302	19.1304	82.7397	1.13398	0.674858	1	0.0767923	0.0767923	6	4	6	0.03125	0.6875
UniRef100_A0A9N8I427	5	7	110	358	4.34783	98.0822	2.32468	0.169888	1	0.0770923	0.0770923	5	5	2	0.0625	1
UniRef100_A0A2W2U934	27	70	88	295	23.4783	80.8219	1.29302	0.351327	1	0.0770923	0.0770923	10	9	6	0.0214844	0.753906
UniRef100_UPI001AADE2B0	2	15	113	350	98.2609	4.10959	0.412979	0.383924	1	0.0770923	0.0770923	14	2	13	0.00183105	0.0129395
UniRef100_Q2FWE1	30	88	85	277	26.087	75.8904	1.11096	0.709738	1	0.0770923	0.0770923	16	13	9	0.0212708	0.803619
UniRef100_A0A9Q4MH46	29	91	86	274	25.2174	75.0685	1.01533	1	1	0.0771923	0.0771923	9	5	7	0.179688	1
UniRef100_Q5HGG7	25	74	90	291	21.7391	79.726	1.09234	0.791631	1	0.0772923	0.0772923	9	8	4	0.0390625	1
UniRef100_A0A7Z8DB75	10	23	105	342	8.69565	93.6986	1.41615	0.398993	1	0.0773923	0.0773923	5	5	4	0.0625	0.375
UniRef100_A0A391A2R3	9	28	106	337	7.82609	92.3288	1.0219	1	1	0.0773923	0.0773923	5	3	4	0.375	1
UniRef100_A0A1X9H088	3	11	112	354	97.3913	3.0137	0.862013	1	1	0.0774923	0.0774923	3	3	1	0.25	1
UniRef100_R9QTP0	6	9	109	356	5.21739	97.5342	2.17737	0.213463	1	0.0775922	0.0775922	4	4	3	0.125	0.625
UniRef100_A0A0Z4JBW5	13	30	102	335	11.3043	91.7808	1.4232	0.348904	1	0.0777922	0.0777922	8	8	2	0.0078125	0.289062
UniRef100_Q2FK44	109	328	6	37	94.7826	10.137	2.04929	0.13391	1	0.0779922	0.0779922	24	22	5	3.5882e-05	0.00661075
UniRef100_Q6G716	54	149	61	216	46.9565	59.1781	1.28331	0.279209	1	0.0779922	0.0779922	17	15	7	0.00234985	0.629059
UniRef100_A0A641AA19	9	25	106	340	7.82609	93.1507	1.15472	0.681393	1	0.0784922	0.0784922	6	6	5	0.03125	0.21875
UniRef100_T1YCK0	24	47	91	318	20.8696	87.1233	1.78443	0.0491505	1	0.0785921	0.0785921	6	6	3	0.03125	1
UniRef100_Q6GEN3	49	176	66	189	57.3913	48.2192	0.797262	0.335028	1	0.0785921	0.0785921	16	15	6	0.000518799	0.454498
UniRef100_A0A9Q8DJA6	10	31	105	334	8.69565	91.5068	1.02611	1	1	0.0785921	0.0785921	3	1	3	0.25	1
UniRef100_A0A5C8XBY4	9	25	106	340	7.82609	93.1507	1.15472	0.681393	1	0.0786921	0.0786921	13	3	11	0.0224609	0.0922852
UniRef100_Q5HFR2	114	351	1	14	99.1304	3.83562	4.54701	0.133877	1	0.0788921	0.0788921	15	14	1	0.000976562	0.000976562
UniRef100_A0A0E0VLY8	83	252	32	113	72.1739	30.9589	1.16307	0.561791	1	0.0789921	0.0789921	30	26	11	5.94761e-05	0.200488
UniRef100_A0A9N8FDD1	11	53	104	312	90.4348	14.5205	0.622642	0.20878	1	0.0792921	0.0792921	7	3	4	1	1
UniRef100_A0A0E1VYQ5	13	56	102	309	88.6957	15.3425	0.703256	0.360269	1	0.0793921	0.0793921	3	1	3	0.25	1
UniRef100_A0A2Y2JGN9	45	126	70	239	39.1304	65.4795	1.21939	0.373784	1	0.0793921	0.0793921	17	15	9	0.00234985	1
UniRef100_A0A9Q4QRI9	20	55	95	310	17.3913	84.9315	1.1866	0.557366	1	0.0793921	0.0793921	4	2	4	0.125	1
UniRef100_A7X274	81	252	34	113	70.4348	30.9589	1.06828	0.817301	1	0.0794921	0.0794921	12	7	8	0.387695	0.774414
UniRef100_A0A9Q7Y064	7	31	108	334	93.913	8.49315	0.698327	0.552268	1	0.079792	0.079792	9	3	6	0.507812	0.507812
UniRef100_A0A9Q3MWJ9	10	36	105	329	91.3043	9.86301	0.87037	0.85618	1	0.079892	0.079892	5	2	3	1	1
UniRef100_A0A0E3XD60	4	4	111	361	3.47826	98.9041	3.25225	0.0981084	1	0.0805919	0.0805919	7	4	3	1	1
UniRef100_C8CH28	77	234	38	131	66.9565	35.8904	1.13439	0.65446	1	0.0806919	0.0806919	46	35	16	0.000535585	0.054076
UniRef100_A0A7Z8GA83	3	6	112	359	2.6087	98.3562	1.60268	0.452892	1	0.0808919	0.0808919	3	3	2	0.25	1
UniRef100_UPI000241E26D	8	40	107	325	93.0435	10.9589	0.607477	0.284295	1	0.0809919	0.0809919	8	4	5	0.726562	1
UniRef100_A0A641ABQ3	4	7	111	358	3.47826	98.0822	1.84299	0.304113	1	0.0812919	0.0812919	4	4	3	0.125	0.625
UniRef100_Q6G9T9	31	101	84	264	73.0435	27.6712	0.964639	0.90537	1	0.0816918	0.0816918	15	9	10	0.301758	0.607239
UniRef100_A0A9Q4QQE3	17	33	98	332	14.7826	90.9589	1.74521	0.0825893	1	0.0824918	0.0824918	9	8	3	0.0390625	0.507812
UniRef100_Q2FHK9	41	117	74	248	35.6522	67.9452	1.17441	0.495722	1	0.0824918	0.0824918	7	3	7	0.015625	1
UniRef100_B6VQV7	8	18	107	347	6.95652	95.0685	1.44133	0.477455	1	0.0825917	0.0825917	8	6	4	0.289062	1
UniRef100_A7X160	88	268	27	97	76.5217	26.5753	1.17966	0.543337	1	0.0825917	0.0825917	23	21	8	6.60419e-05	0.21004
UniRef100_Q8RJN6	8	30	107	335	93.0435	8.21918	0.834891	0.843133	1	0.0825917	0.0825917	7	3	5	0.453125	1
UniRef100_X5DSI9	86	268	29	97	74.7826	26.5753	1.07334	0.809072	1	0.0826917	0.0826917	17	16	4	0.000274658	0.0490417
UniRef100_Q2FDU5	29	83	86	282	25.2174	77.2603	1.1457	0.61361	1	0.0828917	0.0828917	7	7	5	0.015625	0.453125
UniRef100_A7X3R0	9	29	106	336	92.1739	7.94521	0.983735	1	1	0.0828917	0.0828917	5	3	4	0.375	1
UniRef100_A0A6B5CY68	6	5	109	360	5.21739	98.6301	3.9633	0.0265812	1	0.0830917	0.0830917	10	5	5	1	1
UniRef100_A0A0E0VNL0	34	114	81	251	70.4348	31.2329	0.924193	0.817037	1	0.0830917	0.0830917	7	7	2	0.015625	0.453125
UniRef100_UPI00021AE140	9	38	106	327	92.1739	10.411	0.730636	0.476163	1	0.0832917	0.0832917	8	8	1	0.0078125	0.0703125
UniRef100_Q6GFV1	43	153	72	212	62.6087	41.9178	0.827524	0.446525	1	0.0833917	0.0833917	15	14	5	0.000976562	0.301758
UniRef100_A0A133PW60	25	68	90	297	21.7391	81.3699	1.21324	0.499031	1	0.0835916	0.0835916	7	4	5	0.453125	1
UniRef100_Q2FGE2	54	185	61	180	53.0435	50.6849	0.86132	0.521777	1	0.0835916	0.0835916	17	12	13	0.0490417	0.143463
UniRef100_A0A4P1LTS3	4	23	111	342	96.5217	6.30137	0.53584	0.353585	1	0.0837916	0.0837916	13	4	10	0.0922852	0.266846
UniRef100_Q9RMM6	21	59	94	306	18.2609	83.8356	1.15867	0.666895	1	0.0837916	0.0837916	13	12	5	0.00341797	0.581055
UniRef100_W8UY79	11	47	104	318	90.4348	12.8767	0.71563	0.413287	1	0.0838916	0.0838916	10	5	9	0.0214844	1
UniRef100_A0A6B0D2B1	5	27	110	338	95.6522	7.39726	0.569024	0.291999	1	0.0840916	0.0840916	22	3	19	0.000855446	0.000855446
UniRef100_M9NRL7	2	3	113	362	1.73913	99.1781	2.13569	0.597703	1	0.0840916	0.0840916	2	2	1	0.5	1
UniRef100_A0A131JA61	11	34	104	331	9.56522	90.6849	1.02969	1	1	0.0840916	0.0840916	5	3	4	0.375	1
UniRef100_Q99TL8	20	44	95	321	17.3913	87.9452	1.53589	0.157186	1	0.0841916	0.0841916	8	8	5	0.0078125	0.726562
UniRef100_Q99QX2	31	107	84	258	73.0435	29.3151	0.889853	0.723125	1	0.0841916	0.0841916	13	9	10	0.0922852	0.266846
UniRef100_Q2G107	2	22	113	343	98.2609	6.0274	0.275945	0.0841656	1	0.0844916	0.0844916	4	1	4	0.125	0.625
UniRef100_A0A6B5AGQ1	1	13	114	352	99.1304	3.56164	0.237517	0.20438	1	0.0844916	0.0844916	9	1	8	0.0390625	0.0390625
UniRef100_A0A0H3JR16	36	91	79	274	31.3043	75.0685	1.3721	0.183865	1	0.0845915	0.0845915	10	5	8	0.109375	1
UniRef100_A0FIL6	13	48	102	317	88.6957	13.1507	0.841708	0.748211	1	0.0845915	0.0845915	17	6	14	0.0127258	0.332306
UniRef100_Q2FHD9	26	74	89	291	22.6087	79.726	1.1488	0.599753	1	0.0847915	0.0847915	12	11	7	0.00634766	0.774414
UniRef100_A0A380EP51	55	178	60	187	52.1739	48.7671	0.963015	0.914906	1	0.0848915	0.0848915	18	17	8	0.000144958	0.814529
UniRef100_P72370	14	45	101	320	87.8261	12.3288	0.985699	1	1	0.0848915	0.0848915	9	8	1	0.0390625	0.0390625
UniRef100_UPI00044F71C3	3	2	112	363	2.6087	99.4521	4.86161	0.0917489	1	0.0850915	0.0850915	3	3	1	0.25	1
UniRef100_UPI00044EB79B	3	3	112	362	2.6087	99.1781	3.23214	0.152027	1	0.0850915	0.0850915	4	3	3	0.625	0.625
UniRef100_W8TQR3	58	150	57	215	50.4348	58.9041	1.45848	0.084798	1	0.0851915	0.0851915	15	14	6	0.000976562	0.607239
UniRef100_A0A9Q3MV81	14	42	101	323	12.1739	88.4932	1.06601	0.868054	1	0.0852915	0.0852915	4	4	3	0.125	0.625
UniRef100_A0A062WB74	36	93	79	272	31.3043	74.5205	1.33279	0.22908	1	0.0854915	0.0854915	38	23	18	0.255875	0.871415
UniRef100_A0EWZ3	49	138	66	227	42.6087	62.1918	1.22123	0.381202	1	0.0855914	0.0855914	43	27	24	0.126289	0.542384
UniRef100_Q7A7G0	24	76	91	289	20.8696	79.1781	1.00289	1	1	0.0855914	0.0855914	8	5	6	0.289062	0.726562
UniRef100_A0A9N8FEY8	12	43	103	322	89.5652	11.7808	0.872432	0.86669	1	0.0858914	0.0858914	11	10	3	0.0117188	0.226562
UniRef100_Q33C61	89	280	26	85	77.3913	23.2877	1.03915	1	1	0.0858914	0.0858914	21	20	4	2.09808e-05	0.00719738
UniRef100_P65421	19	52	96	313	16.5217	85.7534	1.19131	0.548942	1	0.0860914	0.0860914	7	7	5	0.015625	0.453125
UniRef100_A0A0U1MSP4	11	57	104	308	90.4348	15.6164	0.571525	0.125142	1	0.0863914	0.0863914	6	3	4	0.6875	1
UniRef100_X5EGJ1	19	80	96	285	83.4783	21.9178	0.705078	0.236009	1	0.0864914	0.0864914	8	2	8	0.0078125	0.289062
UniRef100_A0A9Q4Y4X8	4	12	111	353	3.47826	96.7123	1.06006	1	1	0.0864914	0.0864914	5	3	4	0.375	1
UniRef100_Q2YU04	30	130	85	235	73.913	35.6164	0.638009	0.0693513	1	0.0865913	0.0865913	10	5	6	0.753906	1
UniRef100_Q6G8G1	31	96	84	269	26.9565	73.6986	1.0341	0.903816	1	0.0865913	0.0865913	7	6	5	0.125	0.453125
UniRef100_A0A9P1SBY2	6	7	109	358	5.21739	98.0822	2.8152	0.0913087	1	0.0868913	0.0868913	7	5	5	0.453125	0.453125
UniRef100_Q6GF48	15	48	100	317	86.9565	13.1507	0.990625	1	1	0.0869913	0.0869913	11	10	4	0.0117188	0.548828
UniRef100_A0A1M3SJC8	13	29	102	336	11.3043	92.0548	1.47667	0.261207	1	0.0870913	0.0870913	8	7	5	0.0703125	0.726562
UniRef100_X5EH87	66	209	49	156	57.3913	42.7397	1.00537	1	1	0.0870913	0.0870913	14	9	10	0.179565	0.42395
UniRef100_A0A9Q4M969	20	40	95	325	17.3913	89.0411	1.71053	0.0761652	1	0.0871913	0.0871913	5	4	1	0.375	0.375
UniRef100_A0A133QA80	108	335	7	30	93.913	8.21918	1.38166	0.550626	1	0.0871913	0.0871913	19	17	3	0.000728607	0.00442505
UniRef100_A0A0E1VIW6	20	78	95	287	82.6087	21.3699	0.774629	0.426305	1	0.0873913	0.0873913	9	7	9	0.00390625	0.179688
UniRef100_A0A2C9TSC4	6	17	109	348	5.21739	95.3425	1.12682	0.803907	1	0.0873913	0.0873913	4	2	3	0.625	1
UniRef100_A0A0E1X7E6	11	33	104	332	9.56522	90.9589	1.0641	0.854028	1	0.0875912	0.0875912	5	3	4	0.375	1
UniRef100_A0A0H3JLE5	74	220	41	145	64.3478	39.726	1.18958	0.444973	1	0.0876912	0.0876912	17	16	7	0.000274658	0.629059
UniRef100_A0A0D6HZ13	10	25	105	340	8.69565	93.1507	1.29524	0.537894	1	0.0881912	0.0881912	4	2	4	0.125	1
UniRef100_A0A9N8FCS6	12	55	103	310	89.5652	15.0685	0.656664	0.279516	1	0.0882912	0.0882912	4	2	3	0.625	1
UniRef100_Q2FHU3	23	74	92	291	80	20.274	0.983108	1	1	0.0883912	0.0883912	5	5	4	0.0625	0.375
UniRef100_UPI00024C2BF7	4	6	111	359	3.47826	98.3562	2.15616	0.261055	1	0.0885911	0.0885911	3	3	2	0.25	1
UniRef100_A0A0U1MJD9	11	56	104	309	90.4348	15.3425	0.58362	0.125962	1	0.0888911	0.0888911	5	2	4	0.375	1
UniRef100_Q2FI18	100	315	15	50	86.9565	13.6986	1.0582	1	1	0.0891911	0.0891911	14	13	3	0.00183105	0.057373
UniRef100_Q2FI15	43	115	72	250	37.3913	68.4932	1.29831	0.25617	1	0.0892911	0.0892911	11	10	5	0.0117188	1
UniRef100_UPI00021AEC69	14	51	101	314	87.8261	13.9726	0.853427	0.75478	1	0.0893911	0.0893911	7	7	3	0.015625	1
UniRef100_Q5HGY8	114	346	1	19	99.1304	5.20548	6.26012	0.0568641	1	0.089691	0.089691	16	15	1	0.000518799	0.000518799
UniRef100_UPI00044C83A7	2	0	113	365	1.73913	100	inf	0.0570198	1	0.089791	0.089791	2	2	0	0.5	0.5
UniRef100_A7X2K7	32	96	83	269	27.8261	73.6986	1.08032	0.808992	1	0.089791	0.089791	11	7	9	0.0654297	0.548828
UniRef100_UPI0007BE65E0	4	5	111	360	3.47826	98.6301	2.59459	0.227792	1	0.089991	0.089991	3	3	2	0.25	1
UniRef100_UPI0007BE9B33	4	5	111	360	3.47826	98.6301	2.59459	0.227792	1	0.089991	0.089991	3	3	2	0.25	1
UniRef100_UPI0007BE90C3	4	5	111	360	3.47826	98.6301	2.59459	0.227792	1	0.089991	0.089991	3	3	2	0.25	1
UniRef100_X5E0N6	31	92	84	273	26.9565	74.7945	1.09511	0.714353	1	0.090091	0.090091	12	11	6	0.00634766	1
UniRef100_Q6GKG7	11	35	104	330	90.4348	9.58904	0.997253	1	1	0.090091	0.090091	6	3	4	0.6875	1
UniRef100_A0A9N8FB47	14	47	101	318	87.8261	12.8767	0.937855	1	1	0.090091	0.090091	8	7	1	0.0703125	0.0703125
UniRef100_Q6GBV8	4	8	111	357	3.47826	97.8082	1.60811	0.493218	1	0.090291	0.090291	5	4	2	0.375	1
UniRef100_A0A0U1MJ60	9	49	106	316	92.1739	13.4247	0.547555	0.138976	1	0.090391	0.090391	9	4	6	0.507812	1
UniRef100_A0A641A7L5	24	66	91	299	20.8696	81.9178	1.19481	0.496188	1	0.0905909	0.0905909	10	6	9	0.0214844	0.753906
UniRef100_UPI000386E619	2	0	113	365	1.73913	100	inf	0.0570198	1	0.0906909	0.0906909	2	2	0	0.5	0.5
UniRef100_UPI000445E8FE	2	0	113	365	1.73913	100	inf	0.0570198	1	0.0906909	0.0906909	2	2	0	0.5	0.5
UniRef100_UPI00044A2627	2	0	113	365	1.73913	100	inf	0.0570198	1	0.0906909	0.0906909	2	2	0	0.5	0.5
UniRef100_UPI000446924B	2	0	113	365	1.73913	100	inf	0.0570198	1	0.0906909	0.0906909	2	2	0	0.5	0.5
UniRef100_UPI00044C113C	2	0	113	365	1.73913	100	inf	0.0570198	1	0.0906909	0.0906909	2	2	0	0.5	0.5
UniRef100_UPI00024F1607	0	10	115	355	100	2.73973	0	0.127237	1	0.0906909	0.0906909	9	0	9	0.00390625	0.00390625
UniRef100_A0A133PVS0	6	10	109	355	5.21739	97.2603	1.95413	0.231569	1	0.0906909	0.0906909	8	5	5	0.726562	0.726562
UniRef100_X5E203	15	34	100	331	13.0435	90.6849	1.46029	0.288558	1	0.0907909	0.0907909	6	4	5	0.21875	0.6875
UniRef100_A0A0D1HL69	48	142	67	223	41.7391	61.0959	1.12508	0.586697	1	0.0909909	0.0909909	17	16	7	0.000274658	0.629059
UniRef100_M9QQL5	3	2	112	363	2.6087	99.4521	4.86161	0.0917489	1	0.0910909	0.0910909	5	3	2	1	1
UniRef100_Q9B0F0	3	2	112	363	2.6087	99.4521	4.86161	0.0917489	1	0.0910909	0.0910909	5	3	2	1	1
UniRef100_A0A7U7JUN7	3	2	112	363	2.6087	99.4521	4.86161	0.0917489	1	0.0910909	0.0910909	5	3	2	1	1
UniRef100_UPI000250666A	3	2	112	363	2.6087	99.4521	4.86161	0.0917489	1	0.0910909	0.0910909	5	3	2	1	1
UniRef100_A0A7U7JUR0	3	2	112	363	2.6087	99.4521	4.86161	0.0917489	1	0.0910909	0.0910909	5	3	2	1	1
UniRef100_A0A0E1VM88	19	57	96	308	16.5217	84.3836	1.06944	0.883575	1	0.0910909	0.0910909	8	7	4	0.0703125	1
UniRef100_A0A0D3Q778	29	84	86	281	25.2174	76.9863	1.12805	0.616455	1	0.0911909	0.0911909	11	10	6	0.0117188	1
UniRef100_A0A0E1VNU8	11	51	104	314	90.4348	13.9726	0.651207	0.265232	1	0.0912909	0.0912909	3	1	3	0.25	1
UniRef100_A0A8G2I364	3	2	112	363	2.6087	99.4521	4.86161	0.0917489	1	0.0913909	0.0913909	5	3	2	1	1
UniRef100_A0A0X1VSY7	8	12	107	353	6.95652	96.7123	2.19938	0.106448	1	0.0913909	0.0913909	7	5	5	0.453125	0.453125
UniRef100_A0A0E0VRD0	14	46	101	319	87.8261	12.6027	0.961257	1	1	0.0913909	0.0913909	18	11	11	0.480682	0.480682
UniRef100_A0A9N8FDI3	11	55	104	310	90.4348	15.0685	0.596154	0.162516	1	0.0914909	0.0914909	6	3	4	0.6875	1
UniRef100_Q6YCN4	11	35	104	330	90.4348	9.58904	0.997253	1	1	0.0914909	0.0914909	6	3	4	0.6875	1
UniRef100_A0A0E1VVV9	12	53	103	312	89.5652	14.5205	0.68584	0.347998	1	0.0915908	0.0915908	7	3	6	0.125	1
UniRef100_A0A658WFK9	11	33	104	332	9.56522	90.9589	1.0641	0.854028	1	0.0916908	0.0916908	5	3	4	0.375	1
UniRef100_UPI0001C0B567	4	20	111	345	96.5217	5.47945	0.621622	0.471064	1	0.0917908	0.0917908	11	3	9	0.0654297	0.226562
UniRef100_A0A0Y8XXQ0	9	28	106	337	7.82609	92.3288	1.0219	1	1	0.0917908	0.0917908	9	5	6	0.507812	1
UniRef100_A0A7T1JPY0	3	2	112	363	2.6087	99.4521	4.86161	0.0917489	1	0.0918908	0.0918908	5	3	2	1	1
UniRef100_A0A0E1X644	8	22	107	343	6.95652	93.9726	1.16568	0.665066	1	0.0919908	0.0919908	9	6	7	0.179688	0.507812
UniRef100_A0A0D1HWL9	84	250	31	115	73.0435	31.5068	1.24645	0.416027	1	0.0920908	0.0920908	21	19	6	0.000221252	0.0783539
UniRef100_T1YBZ9	9	18	106	347	7.82609	95.0685	1.63679	0.248975	1	0.0921908	0.0921908	5	5	4	0.0625	0.375
UniRef100_A7X2Y4	29	79	86	286	25.2174	78.3562	1.22078	0.443259	1	0.0922908	0.0922908	11	9	6	0.0654297	1
UniRef100_Q6GIC2	11	28	104	337	9.56522	92.3288	1.27301	0.557355	1	0.0923908	0.0923908	8	8	4	0.0078125	1
UniRef100_A0A0U1MIR3	5	37	110	328	95.6522	10.137	0.402948	0.0591757	1	0.0925907	0.0925907	6	2	6	0.03125	0.6875
UniRef100_UPI000A8451A7	3	2	112	363	2.6087	99.4521	4.86161	0.0917489	1	0.0925907	0.0925907	5	3	2	1	1
UniRef100_A0A0E1XGF9	12	26	103	339	10.4348	92.8767	1.51904	0.241538	1	0.0925907	0.0925907	13	10	6	0.0922852	1
UniRef100_A0A3A5LQS0	11	31	104	334	9.56522	91.5068	1.13958	0.707459	1	0.0928907	0.0928907	3	1	3	0.25	1
UniRef100_Q4ZBJ7	3	2	112	363	2.6087	99.4521	4.86161	0.0917489	1	0.0929907	0.0929907	5	3	2	1	1
UniRef100_A0A114LG15	12	28	103	337	10.4348	92.3288	1.40222	0.338869	1	0.0930907	0.0930907	7	7	3	0.015625	1
UniRef100_A0A1C9ZYH5	8	11	107	354	6.95652	96.9863	2.40612	0.0942362	1	0.0931907	0.0931907	5	4	3	0.375	1
UniRef100_A0A641A3M3	23	69	92	296	20	81.0959	1.07246	0.787036	1	0.0931907	0.0931907	11	9	4	0.0654297	0.548828
UniRef100_A0A0Y9RK74	3	2	112	363	2.6087	99.4521	4.86161	0.0917489	1	0.0933907	0.0933907	5	3	2	1	1
UniRef100_UPI0007C5B744	3	2	112	363	2.6087	99.4521	4.86161	0.0917489	1	0.0933907	0.0933907	5	3	2	1	1
UniRef100_T1YDT9	4	9	111	356	3.47826	97.5342	1.42543	0.521608	1	0.0935906	0.0935906	5	4	4	0.375	0.375
UniRef100_A0A2W3XW02	43	135	72	230	37.3913	63.0137	1.01749	1	1	0.0935906	0.0935906	12	11	8	0.00634766	0.387695
UniRef100_A0A0C6EGA6	4	4	111	361	3.47826	98.9041	3.25225	0.0981084	1	0.0936906	0.0936906	8	4	4	1	1
UniRef100_A0A9N8FE71	11	57	104	308	90.4348	15.6164	0.571525	0.125142	1	0.0937906	0.0937906	6	2	4	0.6875	0.6875
UniRef100_Q5HHQ4	94	286	21	79	81.7391	21.6438	1.23643	0.510748	1	0.0938906	0.0938906	17	16	6	0.000274658	0.332306
UniRef100_A7X141	21	61	94	304	18.2609	83.2877	1.11336	0.672876	1	0.0939906	0.0939906	6	4	6	0.03125	0.6875
UniRef100_A0A6B5BWZ6	21	61	94	304	18.2609	83.2877	1.11336	0.672876	1	0.0939906	0.0939906	10	9	5	0.0214844	1
UniRef100_A0A3A2IZ95	10	29	105	336	8.69565	92.0548	1.10345	0.844979	1	0.0940906	0.0940906	6	3	4	0.6875	1
UniRef100_A0A7Z7QY09	11	35	104	330	90.4348	9.58904	0.997253	1	1	0.0942906	0.0942906	6	3	4	0.6875	1
UniRef100_A0A5C8X9W2	14	37	101	328	12.1739	89.863	1.22879	0.602519	1	0.0943906	0.0943906	5	5	2	0.0625	1
UniRef100_P66840	46	138	69	227	40	62.1918	1.09662	0.741559	1	0.0943906	0.0943906	13	12	5	0.00341797	0.581055
UniRef100_A0A2W3G8K0	35	108	80	257	30.4348	70.411	1.04109	0.907026	1	0.0943906	0.0943906	9	7	8	0.0390625	0.179688
UniRef100_A0A0E1X4B4	11	35	104	330	90.4348	9.58904	0.997253	1	1	0.0943906	0.0943906	6	3	4	0.6875	1
UniRef100_A0A7U7IFE7	20	42	95	323	17.3913	88.4932	1.61905	0.111429	1	0.0944906	0.0944906	4	4	3	0.125	0.625
UniRef100_A0A9Q4U7R3	10	54	105	311	91.3043	14.7945	0.548501	0.115185	1	0.0944906	0.0944906	8	3	5	0.726562	0.726562
UniRef100_A0A0U1MI94	11	55	104	310	90.4348	15.0685	0.596154	0.162516	1	0.0944906	0.0944906	6	3	4	0.6875	1
UniRef100_A0A6K7XMI0	3	6	112	359	2.6087	98.3562	1.60268	0.452892	1	0.0945905	0.0945905	3	3	2	0.25	1
UniRef100_T1Y6Z4	12	46	103	319	89.5652	12.6027	0.807936	0.62404	1	0.0945905	0.0945905	4	3	4	0.125	0.625
UniRef100_UPI000E0D93D6	4	11	111	354	3.47826	96.9863	1.15971	0.763303	1	0.0945905	0.0945905	3	1	3	0.25	1
UniRef100_A0A0E1VW60	10	43	105	322	91.3043	11.7808	0.713178	0.398775	1	0.0948905	0.0948905	3	2	3	0.25	1
UniRef100_Q53833	3	2	112	363	2.6087	99.4521	4.86161	0.0917489	1	0.0949905	0.0949905	5	3	2	1	1
UniRef100_A0A229LVD0	4	34	111	331	96.5217	9.31507	0.350821	0.0471973	1	0.0950905	0.0950905	7	3	6	0.125	1
UniRef100_X5E3H3	78	223	37	142	67.8261	38.9041	1.34238	0.223999	1	0.0950905	0.0950905	16	14	6	0.00418091	0.454498
UniRef100_A0A9P1SCX9	7	32	108	333	93.913	8.76712	0.674479	0.43684	1	0.0950905	0.0950905	9	4	6	0.507812	1
UniRef100_Q5HJN0	44	151	71	214	61.7391	41.3699	0.878276	0.587256	1	0.0951905	0.0951905	15	8	11	0.118469	1
UniRef100_A0A0Y9VM97	20	44	95	321	17.3913	87.9452	1.53589	0.157186	1	0.0952905	0.0952905	19	14	8	0.0635681	0.647606
UniRef100_T1Y682	83	259	32	106	72.1739	29.0411	1.06153	0.906	1	0.0952905	0.0952905	22	20	7	0.000121117	0.133801
UniRef100_A0A9E8GB82	7	9	108	356	6.08696	97.5342	2.56379	0.0734777	1	0.0953905	0.0953905	9	5	5	1	1
UniRef100_A0A5F0HKR9	11	57	104	308	90.4348	15.6164	0.571525	0.125142	1	0.0953905	0.0953905	6	3	4	0.6875	1
UniRef100_UPI0002432ECC	4	7	111	358	3.47826	98.0822	1.84299	0.304113	1	0.0953905	0.0953905	5	4	3	0.375	1
UniRef100_A0A131JTH8	11	35	104	330	90.4348	9.58904	0.997253	1	1	0.0954905	0.0954905	6	3	4	0.6875	1
UniRef100_T1Y6Y9	8	19	107	346	6.95652	94.7945	1.36153	0.488631	1	0.0955904	0.0955904	4	4	4	0.125	0.125
UniRef100_UPI00021AD647	5	7	110	358	4.34783	98.0822	2.32468	0.169888	1	0.0959904	0.0959904	5	4	3	0.375	1
UniRef100_A0A9Q4ULZ0	4	4	111	361	3.47826	98.9041	3.25225	0.0981084	1	0.0960904	0.0960904	8	4	4	1	1
UniRef100_UPI00024C30E3	3	6	112	359	2.6087	98.3562	1.60268	0.452892	1	0.0960904	0.0960904	3	3	2	0.25	1
UniRef100_UPI000207C4D2	4	13	111	352	96.5217	3.56164	0.975745	1	1	0.0961904	0.0961904	4	4	3	0.125	0.625
UniRef100_A0A0U1MSX7	11	56	104	309	90.4348	15.3425	0.58362	0.125962	1	0.0963904	0.0963904	6	3	4	0.6875	1
UniRef100_A1KWY1	2	1	113	364	1.73913	99.726	6.44248	0.1441	1	0.0964904	0.0964904	2	2	1	0.5	1
UniRef100_A0A068A2A6	2	13	113	352	98.2609	3.56164	0.479238	0.53864	1	0.0964904	0.0964904	14	2	13	0.00183105	0.0129395
UniRef100_A0A9Q4UXN5	22	61	93	304	19.1304	83.2877	1.17892	0.572478	1	0.0964904	0.0964904	5	5	4	0.0625	0.375
UniRef100_P64164	10	29	105	336	8.69565	92.0548	1.10345	0.844979	1	0.0964904	0.0964904	6	3	4	0.6875	1
UniRef100_A0A3M8XID1	31	103	84	262	73.0435	28.2192	0.938742	0.905157	1	0.0964904	0.0964904	8	5	8	0.0078125	0.726562
UniRef100_A0A9Q3R9F7	9	37	106	328	92.1739	10.137	0.752677	0.586268	1	0.0965903	0.0965903	6	2	4	0.6875	0.6875
UniRef100_Q2FI07	8	30	107	335	93.0435	8.21918	0.834891	0.843133	1	0.0965903	0.0965903	7	2	6	0.125	0.453125
UniRef100_A0A7H9CFS9	20	44	95	321	17.3913	87.9452	1.53589	0.157186	1	0.0966903	0.0966903	6	6	5	0.03125	0.21875
UniRef100_UPI0002C9A30A	4	4	111	361	3.47826	98.9041	3.25225	0.0981084	1	0.0967903	0.0967903	8	4	4	1	1
UniRef100_A0A0E1VGL3	14	45	101	320	87.8261	12.3288	0.985699	1	1	0.0967903	0.0967903	3	3	2	0.25	1
UniRef100_Q6GIB2	13	29	102	336	11.3043	92.0548	1.47667	0.261207	1	0.0973903	0.0973903	10	9	2	0.0214844	0.109375
UniRef100_A0A0E1XB22	11	35	104	330	90.4348	9.58904	0.997253	1	1	0.0976902	0.0976902	6	3	4	0.6875	1
UniRef100_A0A0E1VLQ7	0	11	115	354	100	3.0137	0	0.0739638	1	0.0982902	0.0982902	8	0	8	0.0078125	0.0078125
UniRef100_Q6GHE0	11	35	104	330	90.4348	9.58904	0.997253	1	1	0.0982902	0.0982902	6	3	4	0.6875	1
UniRef100_Q6GIX3	17	37	98	328	14.7826	89.863	1.53778	0.177578	1	0.0983902	0.0983902	16	11	8	0.210114	1
UniRef100_A0A9Q1XDY3	2	1	113	364	1.73913	99.726	6.44248	0.1441	1	0.0984902	0.0984902	2	2	1	0.5	1
UniRef100_A0A0F6N3N1	2	1	113	364	1.73913	99.726	6.44248	0.1441	1	0.0984902	0.0984902	2	2	1	0.5	1
UniRef100_A0A0C6EL88	4	4	111	361	3.47826	98.9041	3.25225	0.0981084	1	0.0986901	0.0986901	8	4	4	1	1
UniRef100_A0A6B5I0M7	3	4	112	361	2.6087	98.9041	2.41741	0.366061	1	0.0986901	0.0986901	4	3	2	0.625	1
UniRef100_W8U168	70	236	45	129	39.1304	64.6575	0.850282	0.504798	1	0.0987901	0.0987901	9	6	8	0.0390625	0.507812
UniRef100_A0A0U1MN84	12	58	103	307	89.5652	15.8904	0.616672	0.173539	1	0.0990901	0.0990901	3	2	3	0.25	1
UniRef100_A0A8G2M9D8	2	1	113	364	1.73913	99.726	6.44248	0.1441	1	0.0992901	0.0992901	2	2	1	0.5	1
UniRef100_A0A8G2HXQ1	2	1	113	364	1.73913	99.726	6.44248	0.1441	1	0.0992901	0.0992901	2	2	1	0.5	1
UniRef100_A0A8G2HX50	2	1	113	364	1.73913	99.726	6.44248	0.1441	1	0.0992901	0.0992901	2	2	1	0.5	1
UniRef100_A0A0U1MPJ2	12	59	103	306	89.5652	16.1644	0.604246	0.174369	1	0.0992901	0.0992901	7	1	6	0.125	0.125
UniRef100_Q9MBT2	1	11	114	354	99.1304	3.0137	0.282297	0.309308	1	0.0992901	0.0992901	8	1	8	0.0078125	0.0703125
UniRef100_A0A0E7W9B1	24	62	91	303	20.8696	83.0137	1.2889	0.333185	1	0.0992901	0.0992901	7	4	5	0.453125	1
UniRef100_A0A9Q7Y8G9	10	39	105	326	91.3043	10.6849	0.796093	0.60061	1	0.0992901	0.0992901	3	2	3	0.25	1
UniRef100_A0A9Q7Y7J2	6	25	109	340	94.7826	6.84932	0.748624	0.665673	1	0.0992901	0.0992901	9	3	7	0.179688	0.507812
UniRef100_A0A391F509	11	31	104	334	9.56522	91.5068	1.13958	0.707459	1	0.0992901	0.0992901	4	2	4	0.125	1
UniRef100_A0A0E1XD32	13	27	102	338	11.3043	92.6027	1.5955	0.181604	1	0.0993901	0.0993901	8	7	2	0.0703125	0.289062
UniRef100_A7X0N2	112	361	3	4	2.6087	98.9041	0.413666	0.366061	1	0.09969	0.09969	4	1	3	0.625	0.625
UniRef100_A0A075LYF5	35	95	80	270	30.4348	73.9726	1.24342	0.399647	1	0.09999	0.09999	26	17	13	0.168638	1
UniRef100_D2JAS2	4	5	111	360	3.47826	98.6301	2.59459	0.227792	1	0.10009	0.10009	7	4	4	1	1
UniRef100_A0A0H3JRU9	13	28	102	337	11.3043	92.3288	1.53396	0.25082	1	0.10019	0.10019	9	8	4	0.0390625	1
UniRef100_UPI000207C810	18	65	97	300	84.3478	17.8082	0.856463	0.672396	1	0.10019	0.10019	6	6	4	0.03125	0.6875
UniRef100_UPI0002477DE0	2	1	113	364	1.73913	99.726	6.44248	0.1441	1	0.10059	0.10059	2	2	1	0.5	1
UniRef100_UPI00024C2F22	2	1	113	364	1.73913	99.726	6.44248	0.1441	1	0.10059	0.10059	2	2	1	0.5	1
UniRef100_UPI00024C32D6	2	1	113	364	1.73913	99.726	6.44248	0.1441	1	0.10059	0.10059	2	2	1	0.5	1
UniRef100_UPI00024C34AC	2	1	113	364	1.73913	99.726	6.44248	0.1441	1	0.10059	0.10059	2	2	1	0.5	1
UniRef100_UPI0002AFE917	2	1	113	364	1.73913	99.726	6.44248	0.1441	1	0.10059	0.10059	2	2	1	0.5	1
UniRef100_UPI0004B61560	2	1	113	364	1.73913	99.726	6.44248	0.1441	1	0.10059	0.10059	2	2	1	0.5	1
UniRef100_UPI00024C30E8	2	1	113	364	1.73913	99.726	6.44248	0.1441	1	0.10059	0.10059	2	2	1	0.5	1
UniRef100_A0A7Z7R0N4	11	33	104	332	9.56522	90.9589	1.0641	0.854028	1	0.10059	0.10059	5	3	4	0.375	1
UniRef100_Q2FVK2	12	32	103	333	10.4348	91.2329	1.21238	0.581101	1	0.10079	0.10079	7	5	6	0.125	0.453125
UniRef100_A0A0E0VMQ2	98	308	17	57	85.2174	15.6164	1.06684	0.883334	1	0.10079	0.10079	13	13	4	0.000244141	0.266846
UniRef100_Q6GH53	12	25	103	340	10.4348	93.1507	1.58447	0.229394	1	0.10089	0.10089	6	6	2	0.03125	0.6875
UniRef100_A0A2U0IQT5	11	30	104	335	9.56522	91.7808	1.18109	0.702134	1	0.10089	0.10089	3	2	3	0.25	1
UniRef100_A0A9Q7Y1J2	10	38	105	327	91.3043	10.411	0.819549	0.722104	1	0.10089	0.10089	3	2	3	0.25	1
UniRef100_A0A9Q8DIY8	10	38	105	327	91.3043	10.411	0.819549	0.722104	1	0.10089	0.10089	3	2	3	0.25	1
UniRef100_A0A068A5A1	31	88	84	277	26.9565	75.8904	1.16166	0.5378	1	0.10109	0.10109	9	9	5	0.00390625	1
UniRef100_Q2FIA9	6	20	109	345	94.7826	5.47945	0.949541	1	1	0.10109	0.10109	3	1	3	0.25	1
UniRef100_Q6GH88	12	37	103	328	10.4348	89.863	1.0328	1	1	0.10119	0.10119	3	1	3	0.25	1
UniRef100_A0A8G2MAM0	2	1	113	364	1.73913	99.726	6.44248	0.1441	1	0.10129	0.10129	2	2	1	0.5	1
UniRef100_UPI00208E1648	3	4	112	361	2.6087	98.9041	2.41741	0.366061	1	0.10129	0.10129	3	3	1	0.25	1
UniRef100_UPI0011CA14DC	3	4	112	361	2.6087	98.9041	2.41741	0.366061	1	0.10129	0.10129	3	3	1	0.25	1
UniRef100_A0A9Q4V711	3	9	112	356	2.6087	97.5342	1.05952	1	1	0.10129	0.10129	4	1	4	0.125	0.625
UniRef100_Q2FIL2	76	239	39	126	66.087	34.5205	1.02736	1	1	0.10129	0.10129	14	14	5	0.00012207	0.42395
UniRef100_A0A0E1VVY7	11	45	104	320	90.4348	12.3288	0.752137	0.5065	1	0.10149	0.10149	7	3	5	0.453125	1
UniRef100_Q5HHP5	115	355	0	10	100	2.73973	inf	0.127237	1	0.10159	0.10159	9	9	0	0.00390625	0.00390625
UniRef100_T1YD62	6	10	109	355	5.21739	97.2603	1.95413	0.231569	1	0.10159	0.10159	4	4	3	0.125	0.625
UniRef100_A0A9Q3MUN4	10	38	105	327	91.3043	10.411	0.819549	0.722104	1	0.10169	0.10169	4	2	3	0.625	1
UniRef100_A0A0U1MXA0	6	30	109	335	94.7826	8.21918	0.614679	0.415923	1	0.10179	0.10179	8	2	6	0.289062	0.289062
UniRef100_X5E1A4	60	203	55	162	47.8261	55.6164	0.870578	0.521405	1	0.10219	0.10219	12	12	6	0.000488281	1
UniRef100_A0FIL7	12	46	103	319	89.5652	12.6027	0.807936	0.62404	1	0.10219	0.10219	18	6	14	0.0308838	0.237885
UniRef100_R9QTP2	6	8	109	357	5.21739	97.8082	2.45642	0.111379	1	0.10239	0.10239	6	4	4	0.6875	0.6875
UniRef100_UPI00229AC455	2	1	113	364	1.73913	99.726	6.44248	0.1441	1	0.10239	0.10239	2	2	1	0.5	1
UniRef100_A0A0E1VK39	11	49	104	316	90.4348	13.4247	0.682104	0.333072	1	0.10239	0.10239	8	5	6	0.289062	0.726562
UniRef100_A0A133PTF2	8	25	107	340	6.95652	93.1507	1.01682	1	1	0.10249	0.10249	3	2	3	0.25	1
UniRef100_M1XJY4	10	36	105	329	91.3043	9.86301	0.87037	0.85618	1	0.10269	0.10269	4	2	3	0.625	1
UniRef100_UPI0001C0BD17	2	1	113	364	1.73913	99.726	6.44248	0.1441	1	0.10279	0.10279	2	2	1	0.5	1
UniRef100_A0A659IBS1	31	103	84	262	73.0435	28.2192	0.938742	0.905157	1	0.10279	0.10279	18	10	12	0.237885	0.814529
UniRef100_UPI00024C343D	2	5	113	360	1.73913	98.6301	1.27434	0.674903	1	0.10289	0.10289	2	2	2	0.5	0.5
UniRef100_A0A0D6HBJ2	26	64	89	301	22.6087	82.4658	1.37395	0.221022	1	0.10299	0.10299	3	2	3	0.25	1
UniRef100_A0A0E1XA24	11	24	104	341	9.56522	93.4247	1.5028	0.304513	1	0.10299	0.10299	11	9	4	0.0654297	0.548828
UniRef100_A0A7Z7W381	12	37	103	328	10.4348	89.863	1.0328	1	1	0.10299	0.10299	3	1	3	0.25	1
UniRef100_UPI00024C2DDD	2	1	113	364	1.73913	99.726	6.44248	0.1441	1	0.10329	0.10329	2	2	1	0.5	1
UniRef100_UPI00066DFB4C	9	42	106	323	92.1739	11.5068	0.652965	0.301857	1	0.10339	0.10339	6	3	4	0.6875	1
UniRef100_M1XHV1	9	39	106	326	92.1739	10.6849	0.709724	0.476291	1	0.10359	0.10359	3	1	3	0.25	1
UniRef100_A0A7U7F058	2	9	113	356	98.2609	2.46575	0.700098	1	1	0.10359	0.10359	10	2	9	0.0214844	0.109375
UniRef100_A0A9Q4V3T3	6	5	109	360	5.21739	98.6301	3.9633	0.0265812	1	0.10369	0.10369	5	5	1	0.0625	0.375
UniRef100_UPI00069A1ED8	4	12	111	353	3.47826	96.7123	1.06006	1	1	0.10379	0.10379	6	2	5	0.21875	0.6875
UniRef100_A0A641A685	14	45	101	320	87.8261	12.3288	0.985699	1	1	0.10409	0.10409	7	6	4	0.125	1
UniRef100_Q2FI34	11	37	104	328	90.4348	10.137	0.93763	1	1	0.10419	0.10419	8	4	8	0.0078125	1
UniRef100_X5DZU0	9	22	106	343	7.82609	93.9726	1.32376	0.515286	1	0.10449	0.10449	3	2	3	0.25	1
UniRef100_A0A9Q4MB54	35	87	80	278	30.4348	76.1644	1.39799	0.176741	1	0.10459	0.10459	8	8	4	0.0078125	1
UniRef100_P65635	19	45	96	320	16.5217	87.6712	1.40741	0.271197	1	0.10469	0.10469	10	6	8	0.109375	0.753906
UniRef100_A0A114BCV8	12	26	103	339	10.4348	92.8767	1.51904	0.241538	1	0.10479	0.10479	8	7	3	0.0703125	0.726562
UniRef100_A6U4E8	11	26	104	339	9.56522	92.8767	1.37907	0.423013	1	0.10479	0.10479	9	9	4	0.00390625	1
UniRef100_A0A7Z8G972	21	55	94	310	18.2609	84.9315	1.25919	0.463825	1	0.10489	0.10489	5	5	3	0.0625	1
UniRef100_A0A7U7F083	33	99	82	266	28.6957	72.8767	1.0813	0.810785	1	0.10499	0.10499	9	8	6	0.0390625	0.507812
UniRef100_T1YBM8	23	43	92	322	20	88.2192	1.87209	0.0300618	1	0.105389	0.105389	8	8	3	0.0078125	0.726562
UniRef100_A0A0E1X540	7	11	108	354	6.08696	96.9863	2.08586	0.157271	1	0.105389	0.105389	12	7	6	0.774414	1
UniRef100_P60946	13	26	102	339	11.3043	92.8767	1.66176	0.170775	1	0.105389	0.105389	6	6	1	0.03125	0.21875
UniRef100_A0A7U7EYA0	5	4	110	361	4.34783	98.9041	4.10227	0.0397493	1	0.105489	0.105489	7	4	3	1	1
UniRef100_Q6G9R7	5	12	110	353	4.34783	96.7123	1.33712	0.569406	1	0.105489	0.105489	5	4	3	0.375	1
UniRef100_Q4ZBI2	3	0	112	365	2.6087	100	inf	0.0134796	1	0.105689	0.105689	2	2	0	0.5	0.5
UniRef100_UPI0001D429F5	3	0	112	365	2.6087	100	inf	0.0134796	1	0.105689	0.105689	2	2	0	0.5	0.5
UniRef100_UPI00085C7771	3	0	112	365	2.6087	100	inf	0.0134796	1	0.105689	0.105689	2	2	0	0.5	0.5
UniRef100_A0A0E3T9H6	6	8	109	357	5.21739	97.8082	2.45642	0.111379	1	0.105689	0.105689	6	4	4	0.6875	0.6875
UniRef100_A0A6B5FJE7	3	7	112	358	2.6087	98.0822	1.3699	0.708804	1	0.105689	0.105689	3	3	2	0.25	1
UniRef100_Q6G8Q5	35	105	80	260	30.4348	71.2329	1.08333	0.725633	1	0.105789	0.105789	11	7	10	0.0117188	0.548828
UniRef100_A0A0U1MRA0	5	31	110	334	95.6522	8.49315	0.489736	0.159919	1	0.106089	0.106089	13	2	12	0.00341797	0.0224609
UniRef100_A0A9Q4U7G2	2	13	113	352	98.2609	3.56164	0.479238	0.53864	1	0.106089	0.106089	12	2	11	0.00634766	0.0385742
UniRef100_Q6GH27	12	37	103	328	10.4348	89.863	1.0328	1	1	0.106089	0.106089	3	1	3	0.25	1
UniRef100_A0A3A3AFP1	13	37	102	328	11.3043	89.863	1.12984	0.727454	1	0.106189	0.106189	8	4	6	0.289062	1
UniRef100_O07325	25	74	90	291	21.7391	79.726	1.09234	0.791631	1	0.106489	0.106489	14	12	8	0.0129395	0.790527
UniRef100_A0A391LQ43	35	95	80	270	30.4348	73.9726	1.24342	0.399647	1	0.106689	0.106689	11	7	9	0.0654297	0.548828
UniRef100_X5E0G4	13	33	102	332	11.3043	90.9589	1.28223	0.470411	1	0.106889	0.106889	5	5	4	0.0625	0.375
UniRef100_A0A2S6D2I9	15	53	100	312	86.9565	14.5205	0.883019	0.760754	1	0.106889	0.106889	9	8	3	0.0390625	0.507812
UniRef100_Q6G729	22	79	93	286	80.8696	21.6438	0.856404	0.602214	1	0.107089	0.107089	8	6	7	0.0703125	0.289062
UniRef100_UPI000452B6C3	8	16	107	349	6.95652	95.6164	1.63084	0.324501	1	0.107289	0.107289	5	2	4	0.375	1
UniRef100_A0A0E1X778	12	37	103	328	10.4348	89.863	1.0328	1	1	0.107289	0.107289	3	1	3	0.25	1
UniRef100_I7HD06	7	45	108	320	93.913	12.3288	0.460905	0.0836644	1	0.107489	0.107489	14	5	11	0.057373	0.42395
UniRef100_P67743	15	30	100	335	13.0435	91.7808	1.675	0.141607	1	0.107589	0.107589	4	4	1	0.125	0.625
UniRef100_A0A0U1MJZ0	13	60	102	305	88.6957	16.4384	0.647876	0.233069	1	0.107589	0.107589	5	1	5	0.0625	0.375
UniRef100_A0A3Q9R7Y2	2	2	113	363	1.73913	99.4521	3.21239	0.243777	1	0.107689	0.107689	3	2	2	1	1
UniRef100_A0A3T0II96	2	2	113	363	1.73913	99.4521	3.21239	0.243777	1	0.107689	0.107689	3	2	2	1	1
UniRef100_A0A3T0IIA1	2	2	113	363	1.73913	99.4521	3.21239	0.243777	1	0.107689	0.107689	3	2	2	1	1
UniRef100_A0A9Q4ME85	17	43	98	322	14.7826	88.2192	1.299	0.419603	1	0.107689	0.107689	5	2	4	0.375	1
UniRef100_UPI000466778E	2	3	113	362	1.73913	99.1781	2.13569	0.597703	1	0.107689	0.107689	4	2	2	1	1
UniRef100_UPI00021AE4F2	9	40	106	325	92.1739	10.9589	0.689858	0.38161	1	0.107789	0.107789	8	8	1	0.0078125	0.0703125
UniRef100_Q2FDF0	50	135	65	230	43.4783	63.0137	1.31054	0.227696	1	0.107889	0.107889	10	9	6	0.0214844	0.753906
UniRef100_W8TPD6	44	120	71	245	38.2609	67.1233	1.26526	0.310898	1	0.107889	0.107889	15	14	4	0.000976562	0.118469
UniRef100_A0A6B3IJ31	4	4	111	361	3.47826	98.9041	3.25225	0.0981084	1	0.107989	0.107989	4	3	2	0.625	1
UniRef100_UPI0001D42861	4	4	111	361	3.47826	98.9041	3.25225	0.0981084	1	0.107989	0.107989	4	3	2	0.625	1
UniRef100_Q2YXF9	48	174	67	191	58.2609	47.6712	0.786413	0.284682	1	0.107989	0.107989	5	5	1	0.0625	0.375
UniRef100_T1Y567	10	39	105	326	91.3043	10.6849	0.796093	0.60061	1	0.107989	0.107989	9	4	6	0.507812	1
UniRef100_W8URR1	62	177	53	188	53.913	51.5068	1.24251	0.336594	1	0.108089	0.108089	6	4	5	0.21875	0.6875
UniRef100_A0A9P1SAC4	9	35	106	330	92.1739	9.58904	0.800539	0.711334	1	0.108289	0.108289	4	1	4	0.125	0.625
UniRef100_UPI000312EC3E	6	30	109	335	94.7826	8.21918	0.614679	0.415923	1	0.108489	0.108489	11	5	7	0.548828	1
UniRef100_A0A0U1MG39	16	57	99	308	86.087	15.6164	0.873294	0.76623	1	0.108489	0.108489	10	7	4	0.34375	0.753906
UniRef100_A0A641A7A5	31	102	84	263	73.0435	27.9452	0.951564	0.905109	1	0.108589	0.108589	9	5	7	0.179688	1
UniRef100_A0A9Q2TWX4	20	41	95	324	17.3913	88.7671	1.66367	0.107156	1	0.108689	0.108689	9	9	3	0.00390625	0.507812
UniRef100_A7X172	16	39	99	326	13.913	89.3151	1.35095	0.400729	1	0.108689	0.108689	6	4	6	0.03125	0.6875
UniRef100_Q6GFT5	12	37	103	328	10.4348	89.863	1.0328	1	1	0.108689	0.108689	5	2	4	0.375	1
UniRef100_A0A9Q8DG18	3	4	112	361	2.6087	98.9041	2.41741	0.366061	1	0.108789	0.108789	3	3	2	0.25	1
UniRef100_A0A133Q3F8	79	231	36	134	68.6957	36.7123	1.27297	0.315527	1	0.108889	0.108889	5	3	4	0.375	1
UniRef100_UPI00021AE7F8	2	14	113	351	98.2609	3.83562	0.443742	0.379191	1	0.108889	0.108889	5	2	5	0.0625	1
UniRef100_A0A9Q4UWZ2	21	70	94	295	81.7391	19.1781	0.941489	0.892037	1	0.108889	0.108889	7	7	4	0.015625	1
UniRef100_A0A0E1X843	14	28	101	337	12.1739	92.3288	1.66832	0.183447	1	0.108989	0.108989	9	9	1	0.00390625	0.0390625
UniRef100_A0A7D5PL07	41	130	74	235	35.6522	64.3836	1.00156	1	1	0.108989	0.108989	12	11	6	0.00634766	1
UniRef100_UPI00024C2DA1	0	10	115	355	100	2.73973	0	0.127237	1	0.109289	0.109289	9	0	9	0.00390625	0.00390625
UniRef100_A0A0D1I2H9	68	199	47	166	59.1304	45.4795	1.20689	0.39195	1	0.109289	0.109289	8	4	8	0.0078125	1
UniRef100_A0A3M8ZFB1	18	37	97	328	15.6522	89.863	1.64503	0.129657	1	0.109389	0.109389	5	5	3	0.0625	1
UniRef100_Q5HCY4	48	122	67	243	41.7391	66.5753	1.42696	0.117657	1	0.109689	0.109689	13	12	5	0.00341797	0.581055
UniRef100_Q2YZ47	29	96	86	269	74.7826	26.3014	0.944889	0.903153	1	0.109689	0.109689	14	9	10	0.179565	0.42395
UniRef100_A0A060PLE8	5	6	110	359	4.34783	98.3562	2.7197	0.143492	1	0.109889	0.109889	6	4	4	0.6875	0.6875
UniRef100_A0A0E1VKE9	14	43	101	322	12.1739	88.2192	1.03799	0.87019	1	0.109889	0.109889	6	6	1	0.03125	0.21875
UniRef100_A0A0H3K728	44	111	71	254	38.2609	69.589	1.41809	0.136935	1	0.110189	0.110189	14	12	5	0.0129395	0.42395
UniRef100_C8CH17	78	237	37	128	67.8261	35.0685	1.13856	0.65261	1	0.110189	0.110189	41	32	13	0.000430857	0.0275332
UniRef100_T1YCZ8	28	62	87	303	24.3478	83.0137	1.57286	0.0993915	1	0.110289	0.110289	9	8	5	0.0390625	1
UniRef100_A0A2Y2JY23	14	44	101	321	12.1739	87.9452	1.01125	1	1	0.110489	0.110489	7	4	6	0.125	1
UniRef100_Q99V45	8	26	107	339	93.0435	7.12329	0.974838	1	1	0.110589	0.110589	5	3	4	0.375	1
UniRef100_A0A454GZU7	7	29	108	336	93.913	7.94521	0.750958	0.684723	1	0.110789	0.110789	4	4	2	0.125	1
UniRef100_A0A2C9TVL9	7	19	108	346	6.08696	94.7945	1.18031	0.813122	1	0.110789	0.110789	2	1	2	0.5	1
UniRef100_A0A9Q4UXN9	8	21	107	344	6.95652	94.2466	1.22474	0.654857	1	0.110889	0.110889	5	5	4	0.0625	0.375
UniRef100_Q6GGT1	12	35	103	330	10.4348	90.411	1.09847	0.857229	1	0.111289	0.111289	4	2	3	0.625	1
UniRef100_A0A345AMF1	3	8	112	357	2.6087	97.8082	1.19531	0.729662	1	0.111389	0.111389	3	3	2	0.25	1
UniRef100_A0A0H2C4Q0	26	73	89	292	22.6087	80	1.16854	0.597183	1	0.111589	0.111589	11	6	8	0.226562	1
UniRef100_UPI000207C8F3	4	6	111	359	3.47826	98.3562	2.15616	0.261055	1	0.111689	0.111689	5	4	2	0.375	1
UniRef100_A0A0D6WDP8	28	65	87	300	24.3478	82.1918	1.48541	0.136804	1	0.111889	0.111889	8	8	6	0.0078125	0.289062
UniRef100_A0A0D6GBP6	11	22	104	343	9.56522	93.9726	1.64904	0.206038	1	0.111889	0.111889	6	6	3	0.03125	1
UniRef100_A7X0H5	36	108	79	257	31.3043	70.411	1.08439	0.727532	1	0.111889	0.111889	14	7	11	0.057373	1
UniRef100_A0A9Q7Y0W7	45	124	70	241	39.1304	66.0274	1.24942	0.315952	1	0.111989	0.111989	10	10	3	0.00195312	0.34375
UniRef100_UPI0002CC522A	3	6	112	359	2.6087	98.3562	1.60268	0.452892	1	0.112089	0.112089	3	3	2	0.25	1
UniRef100_A0A517J8K1	5	18	110	347	95.6522	4.93151	0.876263	1	1	0.112289	0.112289	10	2	9	0.0214844	0.109375
UniRef100_A0A390RAZ5	11	25	104	340	9.56522	93.1507	1.43846	0.317579	1	0.112389	0.112389	7	7	3	0.015625	1
UniRef100_W8TSC3	53	167	62	198	46.087	54.2466	1.01352	1	1	0.112389	0.112389	20	13	15	0.0413895	0.263176
UniRef100_A0A9Q4MAW8	18	34	97	331	15.6522	90.6849	1.80655	0.0604788	1	0.112589	0.112589	10	9	2	0.0214844	0.109375
UniRef100_A0A0U1MMU7	12	59	103	306	89.5652	16.1644	0.604246	0.174369	1	0.112789	0.112789	5	2	4	0.375	1
UniRef100_C8CH34	35	136	80	229	69.5652	37.2603	0.736673	0.219279	1	0.112889	0.112889	38	15	29	0.00165805	0.255875
UniRef100_Q2FIF3	6	19	109	346	5.21739	94.7945	1.00241	1	1	0.112889	0.112889	4	2	3	0.625	1
UniRef100_A0A389QEW1	12	24	103	341	10.4348	93.4247	1.65534	0.221174	1	0.112989	0.112989	14	10	7	0.179565	1
UniRef100_A0A131JRK6	23	87	92	278	80	23.8356	0.798851	0.446217	1	0.113189	0.113189	7	4	5	0.453125	1
UniRef100_Q93CE0	12	42	103	323	89.5652	11.5068	0.895978	0.866151	1	0.113289	0.113289	14	7	11	0.057373	1
UniRef100_A0A122I7C1	9	32	106	333	92.1739	8.76712	0.88355	0.849917	1	0.113589	0.113589	12	6	8	0.387695	1
UniRef100_A0A2L2E4H5	12	50	103	315	89.5652	13.6986	0.733981	0.427089	1	0.113789	0.113789	7	3	6	0.125	1
UniRef100_Q6G678	36	123	79	242	68.6957	33.6986	0.896573	0.651629	1	0.113889	0.113889	9	9	6	0.00390625	0.507812
UniRef100_A6U290	91	258	24	107	79.1304	29.3151	1.57251	0.0925221	1	0.114189	0.114189	22	20	7	0.000121117	0.133801
UniRef100_UPI0007CA4097	2	15	113	350	98.2609	4.10959	0.412979	0.383924	1	0.114389	0.114389	9	2	8	0.0390625	0.179688
UniRef100_A0A0E0VMQ0	79	247	36	118	68.6957	32.3288	1.04836	0.908935	1	0.114389	0.114389	18	10	11	0.480682	0.814529
UniRef100_A0A389PUB8	13	27	102	338	11.3043	92.6027	1.5955	0.181604	1	0.114489	0.114489	5	5	1	0.0625	0.375
UniRef100_Q7A2T0	50	135	65	230	43.4783	63.0137	1.31054	0.227696	1	0.114489	0.114489	12	12	7	0.000488281	0.774414
UniRef100_A0A2W3TNQ6	33	88	82	277	28.6957	75.8904	1.26677	0.326754	1	0.114489	0.114489	8	8	5	0.0078125	0.726562
UniRef100_A0A0U1MNA9	14	47	101	318	87.8261	12.8767	0.937855	1	1	0.114489	0.114489	6	6	1	0.03125	0.21875
UniRef100_A0A9Q8DKD9	34	85	81	280	29.5652	76.7123	1.38272	0.175516	1	0.114689	0.114689	6	6	3	0.03125	1
UniRef100_Q5HDX9	115	354	0	11	100	3.0137	inf	0.0739638	1	0.114789	0.114789	9	9	0	0.00390625	0.00390625
UniRef100_A0A0U1MKC9	9	43	106	322	92.1739	11.7808	0.635805	0.301907	1	0.114889	0.114889	10	4	6	0.753906	0.753906
UniRef100_A0A068A6D8	53	142	62	223	46.087	61.0959	1.34246	0.191663	1	0.114989	0.114989	14	12	4	0.0129395	0.179565
UniRef100_UPI0002C5F6C8	4	10	111	355	3.47826	97.2603	1.27928	0.750732	1	0.114989	0.114989	5	4	3	0.375	1
UniRef100_W8URT6	22	56	93	309	19.1304	84.6575	1.3053	0.384238	1	0.115088	0.115088	11	6	8	0.226562	1
UniRef100_A0A391MIH9	31	95	84	270	26.9565	73.9726	1.04887	0.903323	1	0.115188	0.115188	9	7	8	0.0390625	0.179688
UniRef100_UPI0009777E9A	2	4	113	361	1.73913	98.9041	1.59735	0.633105	1	0.115388	0.115388	2	2	2	0.5	0.5
UniRef100_A0A0D1IDK8	110	341	5	24	95.6522	6.57534	1.54839	0.502646	1	0.115688	0.115688	24	21	4	0.000277162	0.00154388
UniRef100_UPI0002431EC3	5	11	110	354	4.34783	96.9863	1.46281	0.550803	1	0.115688	0.115688	3	3	3	0.25	0.25
UniRef100_Q2FEM3	44	149	71	216	61.7391	40.8219	0.898384	0.663518	1	0.115688	0.115688	11	7	10	0.0117188	0.548828
UniRef100_Q9EYL5	19	45	96	320	16.5217	87.6712	1.40741	0.271197	1	0.116088	0.116088	8	8	5	0.0078125	0.726562
UniRef100_A0A0D1FAH8	16	59	99	306	86.087	16.1644	0.838213	0.659186	1	0.116088	0.116088	9	8	2	0.0390625	0.179688
UniRef100_A0A0H2IDV7	50	133	65	232	43.4783	63.5616	1.34182	0.187379	1	0.116288	0.116288	8	7	8	0.0078125	0.0703125
UniRef100_Q2YT95	17	64	98	301	85.2174	17.5342	0.815848	0.568883	1	0.116388	0.116388	7	7	2	0.015625	0.453125
UniRef100_A0A9N8I4B0	15	54	100	311	86.9565	14.7945	0.863889	0.760761	1	0.116488	0.116488	5	5	1	0.0625	0.375
UniRef100_A0A0E1VKV6	16	54	99	311	86.087	14.7945	0.930789	0.880525	1	0.116488	0.116488	5	5	3	0.0625	1
UniRef100_UPI0007DCBEE4	9	41	106	324	92.1739	11.2329	0.670962	0.381684	1	0.116588	0.116588	6	3	4	0.6875	1
UniRef100_A0A0E1XDK4	11	35	104	330	90.4348	9.58904	0.997253	1	1	0.116588	0.116588	6	3	4	0.6875	1
UniRef100_A0A0N9NJZ8	3	23	112	342	97.3913	6.30137	0.398292	0.158709	1	0.116788	0.116788	6	2	5	0.21875	0.6875
UniRef100_A7X2Q3	98	326	17	39	14.7826	89.3151	0.689643	0.245011	1	0.116788	0.116788	8	4	5	0.726562	1
UniRef100_A0A2Y2SMF5	32	89	83	276	27.8261	75.6164	1.19561	0.461974	1	0.116788	0.116788	16	13	6	0.0212708	0.454498
UniRef100_A0A2S6DE13	15	66	100	299	86.9565	18.0822	0.679545	0.253542	1	0.116988	0.116988	7	4	5	0.453125	1
UniRef100_A0FKY7	13	55	102	310	88.6957	15.0685	0.71836	0.359755	1	0.116988	0.116988	10	9	5	0.0214844	1
UniRef100_UPI0002423BB4	4	9	111	356	3.47826	97.5342	1.42543	0.521608	1	0.116988	0.116988	4	3	3	0.625	0.625
UniRef100_A0A0D1HPB8	36	115	79	250	68.6957	31.5068	0.990644	1	1	0.117088	0.117088	10	6	8	0.109375	0.753906
UniRef100_Q9B0F1	3	3	112	362	2.6087	99.1781	3.23214	0.152027	1	0.117688	0.117688	5	3	2	1	1
UniRef100_A0A131HSW7	10	32	105	333	91.3043	8.76712	0.991071	1	1	0.117688	0.117688	7	4	5	0.453125	1
UniRef100_A0A3M8WRZ5	36	83	79	282	31.3043	77.2603	1.54827	0.0824192	1	0.117888	0.117888	19	15	8	0.0192108	0.647606
UniRef100_UPI00024324D4	2	1	113	364	1.73913	99.726	6.44248	0.1441	1	0.118288	0.118288	2	2	1	0.5	1
UniRef100_UPI00024326DE	2	1	113	364	1.73913	99.726	6.44248	0.1441	1	0.118288	0.118288	2	2	1	0.5	1
UniRef100_UPI000241DFA4	2	1	113	364	1.73913	99.726	6.44248	0.1441	1	0.118288	0.118288	2	2	1	0.5	1
UniRef100_UPI0002431743	2	1	113	364	1.73913	99.726	6.44248	0.1441	1	0.118288	0.118288	2	2	1	0.5	1
UniRef100_A0A9N8FD98	12	56	103	309	89.5652	15.3425	0.642857	0.221062	1	0.118288	0.118288	4	1	3	0.625	0.625
UniRef100_A0A9N8FEB3	8	37	107	328	93.0435	10.137	0.662794	0.362637	1	0.118288	0.118288	6	2	5	0.21875	0.6875
UniRef100_A0A0D3Q8S4	9	23	106	342	7.82609	93.6986	1.26251	0.527766	1	0.118288	0.118288	4	3	4	0.125	0.625
UniRef100_A0A3M9DQI0	16	43	99	322	13.913	88.2192	1.21024	0.519321	1	0.118388	0.118388	24	14	14	0.541256	0.541256
UniRef100_A0A9Q7Y936	23	80	92	285	80	21.9178	0.890625	0.698146	1	0.118388	0.118388	9	6	8	0.0390625	0.507812
UniRef100_A0A0H2XHV5	12	18	103	347	10.4348	95.0685	2.24595	0.045186	1	0.118588	0.118588	6	5	3	0.21875	1
UniRef100_UPI000D3A6960	2	1	113	364	1.73913	99.726	6.44248	0.1441	1	0.118588	0.118588	2	2	1	0.5	1
UniRef100_A0A0U1MXX1	12	54	103	311	89.5652	14.7945	0.670982	0.278507	1	0.118588	0.118588	5	2	3	1	1
UniRef100_UPI0007CA3999	3	3	112	362	2.6087	99.1781	3.23214	0.152027	1	0.118888	0.118888	5	3	3	1	1
UniRef100_A0A6B5CXL7	7	20	108	345	6.08696	94.5205	1.11806	0.817415	1	0.118988	0.118988	19	6	16	0.00442505	0.167068
UniRef100_A0A0E1VNM4	13	41	102	324	11.3043	88.7671	1.00717	1	1	0.118988	0.118988	7	6	2	0.125	0.453125
UniRef100_T1YBF2	5	14	110	351	4.34783	96.1644	1.13961	0.78659	1	0.119088	0.119088	4	4	3	0.125	0.625
UniRef100_UPI001962B588	2	4	113	361	1.73913	98.9041	1.59735	0.633105	1	0.119188	0.119188	3	2	2	1	1
UniRef100_UPI0007CA2A47	1	1	114	364	0.869565	99.726	3.19298	0.422147	1	0.119388	0.119388	1	1	1	1	1
UniRef100_A0A9N8FE35	9	50	106	315	92.1739	13.6986	0.534906	0.104778	1	0.119488	0.119488	11	5	6	1	1
UniRef100_A0A9Q8DFV1	10	30	105	335	8.69565	91.7808	1.06349	0.848052	1	0.119488	0.119488	5	3	4	0.375	1
UniRef100_A0A9N8FDY9	12	59	103	306	89.5652	16.1644	0.604246	0.174369	1	0.119688	0.119688	3	1	3	0.25	1
UniRef100_A0A0Z1CPQ3	15	37	100	328	13.0435	89.863	1.32973	0.391586	1	0.119788	0.119788	5	5	2	0.0625	1
UniRef100_A0A7Z7QXF7	14	31	101	334	12.1739	91.5068	1.49345	0.270483	1	0.120088	0.120088	7	7	1	0.015625	0.125
UniRef100_A0A0D6HV97	5	21	110	344	95.6522	5.75342	0.744589	0.644917	1	0.120188	0.120188	3	1	3	0.25	1
UniRef100_Q2G2X4	5	21	110	344	95.6522	5.75342	0.744589	0.644917	1	0.120188	0.120188	3	1	3	0.25	1
UniRef100_I7H3R7	3	11	112	354	97.3913	3.0137	0.862013	1	1	0.120188	0.120188	8	2	8	0.0078125	0.289062
UniRef100_A0A0H2C2Z4	25	66	90	299	21.7391	81.9178	1.25842	0.413441	1	0.120388	0.120388	8	7	5	0.0703125	0.726562
UniRef100_Q7WRI2	20	55	95	310	17.3913	84.9315	1.1866	0.557366	1	0.120388	0.120388	7	4	5	0.453125	1
UniRef100_A0A0D6H5I9	10	22	105	343	8.69565	93.9726	1.48485	0.389954	1	0.120488	0.120488	3	3	2	0.25	1
UniRef100_A0A166NSI5	17	66	98	299	85.2174	18.0822	0.785869	0.480635	1	0.120488	0.120488	5	2	4	0.375	1
UniRef100_UPI00044E372E	3	2	112	363	2.6087	99.4521	4.86161	0.0917489	1	0.120688	0.120688	3	3	2	0.25	1
UniRef100_A0A6G4IQ38	2	1	113	364	1.73913	99.726	6.44248	0.1441	1	0.120688	0.120688	2	2	1	0.5	1
UniRef100_UPI00024C2FD0	2	1	113	364	1.73913	99.726	6.44248	0.1441	1	0.120688	0.120688	2	2	1	0.5	1
UniRef100_UPI0001C0BF9F	2	1	113	364	1.73913	99.726	6.44248	0.1441	1	0.120688	0.120688	2	2	1	0.5	1
UniRef100_A0A6G4IT84	2	1	113	364	1.73913	99.726	6.44248	0.1441	1	0.120688	0.120688	2	2	1	0.5	1
UniRef100_A0A6G4IT75	2	1	113	364	1.73913	99.726	6.44248	0.1441	1	0.120688	0.120688	2	2	1	0.5	1
UniRef100_A0A6G4ISJ3	2	1	113	364	1.73913	99.726	6.44248	0.1441	1	0.120688	0.120688	2	2	1	0.5	1
UniRef100_A0A6G4ISB3	2	1	113	364	1.73913	99.726	6.44248	0.1441	1	0.120688	0.120688	2	2	1	0.5	1
UniRef100_A0A6G4IS63	2	1	113	364	1.73913	99.726	6.44248	0.1441	1	0.120688	0.120688	2	2	1	0.5	1
UniRef100_A0A6G4IRZ7	2	1	113	364	1.73913	99.726	6.44248	0.1441	1	0.120688	0.120688	2	2	1	0.5	1
UniRef100_A0A6G4IRF5	2	1	113	364	1.73913	99.726	6.44248	0.1441	1	0.120688	0.120688	2	2	1	0.5	1
UniRef100_A0A6G4IQR6	2	1	113	364	1.73913	99.726	6.44248	0.1441	1	0.120688	0.120688	2	2	1	0.5	1
UniRef100_A0A6G4IQ72	2	1	113	364	1.73913	99.726	6.44248	0.1441	1	0.120688	0.120688	2	2	1	0.5	1
UniRef100_A0A6G4ISK0	2	1	113	364	1.73913	99.726	6.44248	0.1441	1	0.120688	0.120688	2	2	1	0.5	1
UniRef100_A0A6G4IRW5	2	1	113	364	1.73913	99.726	6.44248	0.1441	1	0.120688	0.120688	2	2	1	0.5	1
UniRef100_A0A6G4ISA1	2	1	113	364	1.73913	99.726	6.44248	0.1441	1	0.120688	0.120688	2	2	1	0.5	1
UniRef100_A0A9Q4UC63	2	14	113	351	98.2609	3.83562	0.443742	0.379191	1	0.120688	0.120688	12	2	11	0.00634766	0.0385742
UniRef100_A0A9Q4YEG1	2	14	113	351	98.2609	3.83562	0.443742	0.379191	1	0.120688	0.120688	12	2	11	0.00634766	0.0385742
UniRef100_A0A9Q4Y8G2	2	14	113	351	98.2609	3.83562	0.443742	0.379191	1	0.120688	0.120688	12	2	11	0.00634766	0.0385742
UniRef100_A0A0E1VNC0	15	46	100	319	13.0435	87.3973	1.04022	0.873604	1	0.120688	0.120688	5	5	1	0.0625	0.375
UniRef100_A0A0D1GCV6	25	82	90	283	78.2609	22.4658	0.958672	1	1	0.120688	0.120688	6	2	6	0.03125	0.6875
UniRef100_A0A9Q4U7D9	12	57	103	308	89.5652	15.6164	0.629535	0.221983	1	0.120988	0.120988	4	2	3	0.625	1
UniRef100_A0A9Q4UXQ5	19	51	96	314	16.5217	86.0274	1.21855	0.544603	1	0.121288	0.121288	10	8	4	0.109375	0.753906
UniRef100_T1Y9K5	18	64	97	301	84.3478	17.5342	0.872745	0.776342	1	0.121388	0.121388	5	5	1	0.0625	0.375
UniRef100_A0A0E1XK13	13	29	102	336	11.3043	92.0548	1.47667	0.261207	1	0.121588	0.121588	7	7	2	0.015625	0.453125
UniRef100_W8UT44	79	213	36	152	68.6957	41.6438	1.56599	0.049382	1	0.121788	0.121788	17	15	3	0.00234985	0.0127258
UniRef100_A0A9Q7Y3H0	12	37	103	328	10.4348	89.863	1.0328	1	1	0.122188	0.122188	7	3	5	0.453125	1
UniRef100_A0A0E1XLT7	12	26	103	339	10.4348	92.8767	1.51904	0.241538	1	0.122288	0.122288	6	6	2	0.03125	0.6875
UniRef100_A0A641A8I0	34	99	81	266	29.5652	72.8767	1.12782	0.633456	1	0.122588	0.122588	10	10	5	0.00195312	1
UniRef100_G4KNU0	1	14	114	351	99.1304	3.83562	0.219925	0.133877	1	0.123188	0.123188	13	1	12	0.00341797	0.00341797
UniRef100_Q2FDU4	13	32	102	333	11.3043	91.2329	1.32629	0.462856	1	0.123188	0.123188	7	6	4	0.125	1
UniRef100_A0A9N8I4Q2	6	14	109	351	5.21739	96.1644	1.38008	0.591929	1	0.123188	0.123188	2	1	2	0.5	1
UniRef100_A0A3A5LL43	12	25	103	340	10.4348	93.1507	1.58447	0.229394	1	0.123288	0.123288	8	7	3	0.0703125	0.726562
UniRef100_A0A9N8FE08	12	55	103	310	89.5652	15.0685	0.656664	0.279516	1	0.123288	0.123288	4	2	3	0.625	1
UniRef100_W8U965	71	209	44	156	61.7391	42.7397	1.20444	0.447975	1	0.123388	0.123388	14	13	6	0.00183105	0.790527
UniRef100_A0A068A2G4	47	132	68	233	40.8696	63.8356	1.22003	0.377737	1	0.123588	0.123588	12	11	6	0.00634766	1
UniRef100_A0A0D1HHM9	88	250	27	115	76.5217	31.5068	1.49926	0.102824	1	0.123688	0.123688	11	11	4	0.000976562	0.548828
UniRef100_A0A7U7EZY8	13	25	102	340	11.3043	93.1507	1.73333	0.163436	1	0.123688	0.123688	7	7	1	0.015625	0.125
UniRef100_A0A123C0R0	6	14	109	351	5.21739	96.1644	1.38008	0.591929	1	0.123788	0.123788	2	1	2	0.5	1
UniRef100_S4SUQ1	3	3	112	362	2.6087	99.1781	3.23214	0.152027	1	0.123988	0.123988	5	3	3	1	1
UniRef100_A0A0U1MMW8	12	57	103	308	89.5652	15.6164	0.629535	0.221983	1	0.123988	0.123988	4	2	3	0.625	1
UniRef100_C5I633	4	20	111	345	96.5217	5.47945	0.621622	0.471064	1	0.123988	0.123988	18	4	16	0.00131226	0.0308838
UniRef100_Q6GHU6	13	30	102	335	11.3043	91.7808	1.4232	0.348904	1	0.124088	0.124088	8	7	2	0.0703125	0.289062
UniRef100_W8TN11	101	307	14	58	87.8261	15.8904	1.36296	0.3717	1	0.124188	0.124188	14	13	3	0.00183105	0.057373
UniRef100_Q2FGD0	51	125	64	240	44.3478	65.7534	1.53	0.0591192	1	0.124288	0.124288	12	11	5	0.00634766	0.774414
UniRef100_D2JLI4	9	37	106	328	92.1739	10.137	0.752677	0.586268	1	0.124388	0.124388	14	4	12	0.0129395	0.179565
UniRef100_A0A9Q7V998	9	37	106	328	92.1739	10.137	0.752677	0.586268	1	0.124388	0.124388	14	4	12	0.0129395	0.179565
UniRef100_A0A9Q7Y8S7	10	34	105	331	91.3043	9.31507	0.927171	1	1	0.124388	0.124388	4	2	3	0.625	1
UniRef100_T1Y8U9	62	162	53	203	53.913	55.6164	1.46587	0.0863158	1	0.124488	0.124488	16	14	9	0.00418091	0.803619
UniRef100_A0A5Q2QJ47	12	21	103	344	10.4348	94.2466	1.90846	0.0924857	1	0.124488	0.124488	13	9	7	0.266846	1
UniRef100_A0A2S6D5Q0	3	8	112	357	2.6087	97.8082	1.19531	0.729662	1	0.124488	0.124488	3	3	1	0.25	1
UniRef100_O85383	19	44	96	321	16.5217	87.9452	1.44389	0.266864	1	0.124588	0.124588	7	7	5	0.015625	0.453125
UniRef100_UPI0002CB61AF	6	28	109	337	94.7826	7.67123	0.662516	0.531313	1	0.124588	0.124588	11	4	7	0.548828	0.548828
UniRef100_A0A659I9L6	26	88	89	277	77.3913	24.1096	0.919561	0.802276	1	0.124588	0.124588	8	7	6	0.0703125	0.289062
UniRef100_W8TVJ6	74	214	41	151	64.3478	41.3699	1.27354	0.325968	1	0.124688	0.124688	12	7	8	0.387695	0.774414
UniRef100_A0A0D6HVY2	9	23	106	342	7.82609	93.6986	1.26251	0.527766	1	0.124788	0.124788	4	2	3	0.625	1
UniRef100_UPI0006995F7F	6	6	109	359	5.21739	98.3562	3.29358	0.0428883	1	0.124888	0.124888	6	4	3	0.6875	1
UniRef100_A0A9N8FDU9	7	37	108	328	93.913	10.137	0.574575	0.265102	1	0.125287	0.125287	13	6	8	0.581055	1
UniRef100_A0A7Z8DAB2	8	13	107	352	6.95652	96.4384	2.02444	0.123811	1	0.125587	0.125587	4	4	3	0.125	0.625
UniRef100_A0A0E1XJZ8	11	27	104	338	9.56522	92.6027	1.32407	0.433976	1	0.125887	0.125887	8	7	6	0.0703125	0.289062
UniRef100_T1YC16	41	121	74	244	35.6522	66.8493	1.11727	0.651601	1	0.125987	0.125987	11	10	6	0.0117188	1
UniRef100_Q2VG53	15	47	100	318	13.0435	87.1233	1.01489	1	1	0.125987	0.125987	10	9	4	0.0214844	0.753906
UniRef100_I2FK96	38	94	77	271	33.0435	74.2466	1.42277	0.150416	1	0.126187	0.126187	14	12	6	0.0129395	0.790527
UniRef100_A0A9N8I5R3	3	3	112	362	2.6087	99.1781	3.23214	0.152027	1	0.126287	0.126287	5	3	3	1	1
UniRef100_A0A2G4VGB4	87	276	28	89	75.6522	24.3836	1.00194	1	1	0.126387	0.126387	14	13	4	0.00183105	0.179565
UniRef100_A0A0E0VMR4	5	25	110	340	95.6522	6.84932	0.618182	0.386375	1	0.126487	0.126487	4	4	1	0.125	0.625
UniRef100_Q2FJD8	14	29	101	336	12.1739	92.0548	1.60601	0.189529	1	0.126587	0.126587	14	10	8	0.179565	0.790527
UniRef100_A0A0U1MW07	10	49	105	316	91.3043	13.4247	0.614189	0.196323	1	0.126787	0.126787	8	3	5	0.726562	0.726562
UniRef100_A0A659I5J6	4	11	111	354	3.47826	96.9863	1.15971	0.763303	1	0.126787	0.126787	4	4	4	0.125	0.125
UniRef100_M9NRM6	35	96	80	269	30.4348	73.6986	1.22591	0.401915	1	0.126987	0.126987	31	19	17	0.281042	0.7201
UniRef100_A7X4V1	113	343	2	22	98.2609	6.0274	3.62391	0.0841656	1	0.127087	0.127087	15	14	2	0.000976562	0.00738525
UniRef100_A0A9N8I4Z1	13	45	102	320	88.6957	12.3288	0.906318	0.870321	1	0.127087	0.127087	8	8	2	0.0078125	0.289062
UniRef100_A0A163SIN8	5	4	110	361	4.34783	98.9041	4.10227	0.0397493	1	0.127287	0.127287	8	4	4	1	1
UniRef100_UPI001011E6BF	6	14	109	351	5.21739	96.1644	1.38008	0.591929	1	0.127387	0.127387	4	4	3	0.125	0.625
UniRef100_A0A9Q4MD42	19	36	96	329	16.5217	90.137	1.80874	0.0638464	1	0.127487	0.127487	8	8	1	0.0078125	0.0703125
UniRef100_A0A389Q5H3	12	32	103	333	10.4348	91.2329	1.21238	0.581101	1	0.127587	0.127587	4	2	3	0.625	1
UniRef100_A0A2Y1WCJ6	17	49	98	316	14.7826	86.5753	1.1187	0.756342	1	0.127587	0.127587	6	6	4	0.03125	0.6875
UniRef100_W8U332	71	193	44	172	61.7391	47.1233	1.43806	0.107207	1	0.127787	0.127787	8	8	2	0.0078125	0.289062
UniRef100_Q6G9W7	24	75	91	290	20.8696	79.4521	1.01978	1	1	0.127787	0.127787	9	8	5	0.0390625	1
UniRef100_A0A0D6GTD2	48	135	67	230	41.7391	63.0137	1.22056	0.379529	1	0.127887	0.127887	20	17	8	0.00257683	0.503445
UniRef100_A7X4J1	54	189	61	176	53.0435	51.7808	0.824356	0.393141	1	0.127987	0.127987	15	10	12	0.0351562	0.301758
UniRef100_A0A0Z0N9L1	4	3	111	362	3.47826	99.1781	4.34835	0.0599568	1	0.128187	0.128187	4	3	3	0.625	0.625
UniRef100_O54475	4	3	111	362	3.47826	99.1781	4.34835	0.0599568	1	0.128187	0.128187	4	3	3	0.625	0.625
UniRef100_Q4ZE77	4	3	111	362	3.47826	99.1781	4.34835	0.0599568	1	0.128187	0.128187	4	3	3	0.625	0.625
UniRef100_A0A976XGX1	3	3	112	362	2.6087	99.1781	3.23214	0.152027	1	0.128787	0.128787	5	3	3	1	1
UniRef100_A0A0D6HHM0	43	117	72	248	37.3913	67.9452	1.26591	0.308215	1	0.128787	0.128787	10	10	3	0.00195312	0.34375
UniRef100_UPI0002CA8A46	3	1	112	364	2.6087	99.726	9.75	0.0444233	1	0.129187	0.129187	2	2	1	0.5	1
UniRef100_A7X426	100	318	15	47	13.0435	87.1233	0.985325	1	1	0.129187	0.129187	10	10	2	0.00195312	0.109375
UniRef100_A0A9P1SE12	6	6	109	359	5.21739	98.3562	3.29358	0.0428883	1	0.129287	0.129287	3	3	0	0.25	0.25
UniRef100_A0A2W3GZ81	26	73	89	292	22.6087	80	1.16854	0.597183	1	0.129387	0.129387	7	5	6	0.125	0.453125
UniRef100_Q8NUL1	97	301	18	64	84.3478	17.5342	1.14581	0.776342	1	0.129487	0.129487	13	13	4	0.000244141	0.266846
UniRef100_A0A0E1VN49	9	41	106	324	92.1739	11.2329	0.670962	0.381684	1	0.129687	0.129687	6	3	4	0.6875	1
UniRef100_A0A0E1X822	11	34	104	331	9.56522	90.6849	1.02969	1	1	0.129687	0.129687	4	2	4	0.125	1
UniRef100_A0A7I0YLV2	80	229	35	136	69.5652	37.2603	1.35745	0.219279	1	0.129787	0.129787	15	14	6	0.000976562	0.607239
UniRef100_A0EWZ1	54	157	61	208	46.9565	56.9863	1.17281	0.518161	1	0.129887	0.129887	56	34	25	0.140895	0.504404
UniRef100_UPI00044A9027	3	1	112	364	2.6087	99.726	9.75	0.0444233	1	0.129987	0.129987	2	2	1	0.5	1
UniRef100_Q79EU8	47	142	68	223	40.8696	61.0959	1.08544	0.743079	1	0.129987	0.129987	12	11	4	0.00634766	0.387695
UniRef100_A0A9Q4YML6	14	49	101	316	87.8261	13.4247	0.893918	0.874254	1	0.129987	0.129987	5	3	4	0.375	1
UniRef100_A0A9Q4MFN7	26	61	89	304	22.6087	83.2877	1.45589	0.165704	1	0.130187	0.130187	6	6	5	0.03125	0.21875
UniRef100_A0A9N8I3P0	14	50	101	315	87.8261	13.6986	0.873267	0.754527	1	0.130287	0.130287	7	7	1	0.015625	0.125
UniRef100_G5ELA4	31	102	84	263	73.0435	27.9452	0.951564	0.905109	1	0.130487	0.130487	14	7	10	0.179565	1
UniRef100_Q5HJR8	6	18	109	347	5.21739	95.0685	1.06116	1	1	0.130487	0.130487	4	1	3	0.625	0.625
UniRef100_A0A131I335	5	10	110	355	4.34783	97.2603	1.61364	0.368006	1	0.130587	0.130587	3	2	3	0.25	1
UniRef100_A0A0D6GA82	2	8	113	357	98.2609	2.19178	0.789823	1	1	0.130687	0.130687	3	2	2	1	1
UniRef100_UPI0004B73624	0	14	115	351	100	3.83562	0	0.0273586	1	0.130987	0.130987	6	0	6	0.03125	0.03125
UniRef100_Q2FF67	25	107	90	258	78.2609	29.3151	0.669782	0.120776	1	0.130987	0.130987	23	11	18	0.010622	1
UniRef100_A0A9Q4MFZ0	11	26	104	339	9.56522	92.8767	1.37907	0.423013	1	0.130987	0.130987	5	5	2	0.0625	1
UniRef100_Q5HJI8	34	86	81	279	29.5652	76.4384	1.36176	0.217033	1	0.131187	0.131187	16	13	7	0.0212708	0.803619
UniRef100_A0A6B5T5M0	9	23	106	342	7.82609	93.6986	1.26251	0.527766	1	0.131387	0.131387	8	6	6	0.289062	0.289062
UniRef100_A0A6B5BUA7	25	56	90	309	21.7391	84.6575	1.53274	0.117482	1	0.131487	0.131487	9	7	5	0.179688	1
UniRef100_A0A0D1HKC3	34	117	81	248	70.4348	32.0548	0.889733	0.646671	1	0.131487	0.131487	24	19	13	0.00661075	0.83882
UniRef100_A0A6B5PXF9	1	14	114	351	99.1304	3.83562	0.219925	0.133877	1	0.131587	0.131587	11	1	10	0.0117188	0.0117188
UniRef100_T1YAU0	28	60	87	305	24.3478	83.5616	1.63602	0.0716505	1	0.131687	0.131687	10	9	6	0.0214844	0.753906
UniRef100_A0A9Q4MFH4	21	50	94	315	18.2609	86.3014	1.40745	0.231063	1	0.131687	0.131687	6	3	5	0.21875	1
UniRef100_A0FIM6	12	37	103	328	10.4348	89.863	1.0328	1	1	0.131687	0.131687	9	6	7	0.179688	0.507812
UniRef100_T1YD26	4	7	111	358	3.47826	98.0822	1.84299	0.304113	1	0.132087	0.132087	3	3	2	0.25	1
UniRef100_Q5HCR3	41	124	74	241	35.6522	66.0274	1.07683	0.736975	1	0.132087	0.132087	18	15	9	0.00753784	1
UniRef100_A0A0H3K6A3	4	9	111	356	3.47826	97.5342	1.42543	0.521608	1	0.132187	0.132187	6	4	4	0.6875	0.6875
UniRef100_A0A266CPK4	25	88	90	277	78.2609	24.1096	0.874369	0.705461	1	0.132487	0.132487	7	5	6	0.125	0.453125
UniRef100_UPI00024C30EC	5	5	110	360	4.34783	98.6301	3.27273	0.0645055	1	0.132587	0.132587	3	3	1	0.25	1
UniRef100_A0A7U7EX48	12	32	103	333	10.4348	91.2329	1.21238	0.581101	1	0.132687	0.132687	4	2	3	0.625	1
UniRef100_UPI0007BE74D9	2	4	113	361	1.73913	98.9041	1.59735	0.633105	1	0.132687	0.132687	2	2	1	0.5	1
UniRef100_A0A9Q4MG13	19	50	96	315	16.5217	86.3014	1.24687	0.448792	1	0.132787	0.132787	6	3	5	0.21875	1
UniRef100_Q2FWC5	16	45	99	320	13.913	87.6712	1.14927	0.633277	1	0.132787	0.132787	10	7	8	0.109375	0.34375
UniRef100_W8TNJ4	37	120	78	245	67.8261	32.8767	0.968483	0.909824	1	0.132887	0.132887	9	5	7	0.179688	1
UniRef100_A0A6G4Z848	43	122	72	243	37.3913	66.5753	1.18955	0.433253	1	0.132987	0.132987	12	11	6	0.00634766	1
UniRef100_A0A391ENM2	13	38	102	327	11.3043	89.589	1.09675	0.862241	1	0.133287	0.133287	5	3	4	0.375	1
UniRef100_A0A6G4IWQ4	3	3	112	362	2.6087	99.1781	3.23214	0.152027	1	0.133387	0.133387	3	3	1	0.25	1
UniRef100_A0A0U1MJG9	12	56	103	309	89.5652	15.3425	0.642857	0.221062	1	0.133487	0.133487	4	2	3	0.625	1
UniRef100_Q2FE14	11	26	104	339	9.56522	92.8767	1.37907	0.423013	1	0.133487	0.133487	6	5	4	0.21875	0.6875
UniRef100_Q2YTZ6	32	127	83	238	72.1739	34.7945	0.722512	0.174699	1	0.133787	0.133787	13	12	3	0.00341797	0.0922852
UniRef100_A0A1K8BEK6	33	102	82	263	28.6957	72.0548	1.03766	0.905511	1	0.133787	0.133787	12	10	8	0.0385742	0.387695
UniRef100_A0A7W2JA82	22	45	93	320	19.1304	87.6712	1.6822	0.088436	1	0.133887	0.133887	4	4	2	0.125	1
UniRef100_A0A166NTM9	13	30	102	335	11.3043	91.7808	1.4232	0.348904	1	0.133887	0.133887	9	8	2	0.0390625	0.179688
UniRef100_P63333	13	34	102	331	11.3043	90.6849	1.24077	0.58925	1	0.133887	0.133887	3	2	3	0.25	1
UniRef100_A0A0D6GL01	6	18	109	347	5.21739	95.0685	1.06116	1	1	0.134087	0.134087	5	1	4	0.375	0.375
UniRef100_A0A9N8IK42	10	21	105	344	8.69565	94.2466	1.56009	0.278354	1	0.134287	0.134287	10	8	4	0.109375	0.753906
UniRef100_A0A0U1MF38	13	52	102	313	88.6957	14.2466	0.767157	0.53193	1	0.134287	0.134287	7	7	2	0.015625	0.453125
UniRef100_A0A5F0HKL7	16	53	99	312	86.087	14.5205	0.951401	1	1	0.134287	0.134287	9	7	2	0.179688	0.179688
UniRef100_Q6GEV3	12	30	103	335	10.4348	91.7808	1.30097	0.453217	1	0.134387	0.134387	10	8	5	0.109375	1
UniRef100_A0A9Q7V842	10	37	105	328	91.3043	10.137	0.844273	0.722246	1	0.134387	0.134387	3	2	3	0.25	1
UniRef100_T1Y5R6	16	51	99	314	86.087	13.9726	0.995049	1	1	0.134387	0.134387	4	4	3	0.125	0.625
UniRef100_T1YAE9	2	16	113	349	98.2609	4.38356	0.386062	0.264901	1	0.134587	0.134587	4	1	4	0.125	0.625
UniRef100_T1Y7M7	12	45	103	320	89.5652	12.3288	0.828479	0.740956	1	0.134587	0.134587	5	3	4	0.375	1
UniRef100_Q8VLW9	3	1	112	364	2.6087	99.726	9.75	0.0444233	1	0.134687	0.134687	2	2	1	0.5	1
UniRef100_A0A9P1QNM4	13	56	102	309	88.6957	15.3425	0.703256	0.360269	1	0.134687	0.134687	8	3	6	0.289062	0.726562
UniRef100_A0A3A5LQ32	24	79	91	286	79.1304	21.6438	0.954792	0.897173	1	0.134687	0.134687	6	3	5	0.21875	1
UniRef100_A0A390TYX6	14	26	101	339	12.1739	92.8767	1.80731	0.119424	1	0.134787	0.134787	7	7	1	0.015625	0.125
UniRef100_A0A0E1VTC9	12	48	103	317	89.5652	13.1507	0.769417	0.519482	1	0.134787	0.134787	3	2	3	0.25	1
UniRef100_A0A7H9C6A0	22	62	93	303	19.1304	83.0137	1.15609	0.576841	1	0.134887	0.134887	8	4	7	0.0703125	1
UniRef100_A0FIL5	13	46	102	319	88.6957	12.6027	0.883845	0.87067	1	0.134887	0.134887	16	6	13	0.0212708	0.454498
UniRef100_A0A9Q4UWW1	8	17	107	348	6.95652	95.3425	1.53051	0.339394	1	0.134987	0.134987	6	5	4	0.21875	0.6875
UniRef100_R9QTP8	23	67	92	298	20	81.6438	1.11194	0.682991	1	0.134987	0.134987	32	13	26	0.000535053	0.377086
UniRef100_A0A9N8FCV5	12	56	103	309	89.5652	15.3425	0.642857	0.221062	1	0.135086	0.135086	4	1	3	0.625	0.625
UniRef100_UPI0012AFD304	3	1	112	364	2.6087	99.726	9.75	0.0444233	1	0.135186	0.135186	2	2	1	0.5	1
UniRef100_A0A9Q4MEW3	21	46	94	319	18.2609	87.3973	1.54926	0.163878	1	0.135186	0.135186	4	4	2	0.125	1
UniRef100_A0A2W3F370	5	25	110	340	95.6522	6.84932	0.618182	0.386375	1	0.135886	0.135886	3	3	1	0.25	1
UniRef100_Q99WJ2	18	40	97	325	15.6522	89.0411	1.50773	0.190449	1	0.135986	0.135986	6	5	4	0.21875	0.6875
UniRef100_A0A391A6D3	9	24	106	341	7.82609	93.4247	1.20637	0.673275	1	0.135986	0.135986	3	2	3	0.25	1
UniRef100_T1YAS4	15	46	100	319	13.0435	87.3973	1.04022	0.873604	1	0.135986	0.135986	4	4	2	0.125	1
UniRef100_A7X234	14	29	101	336	12.1739	92.0548	1.60601	0.189529	1	0.136086	0.136086	7	6	3	0.125	1
UniRef100_A0A2I7YB75	10	33	105	332	91.3043	9.0411	0.958153	1	1	0.136186	0.136186	3	1	3	0.25	1
UniRef100_A0A090N246	29	123	86	242	74.7826	33.6986	0.663452	0.107281	1	0.136386	0.136386	9	5	7	0.179688	1
UniRef100_A0A0E1X7G8	12	36	103	329	10.4348	90.137	1.06472	0.85927	1	0.136386	0.136386	4	2	3	0.625	1
UniRef100_T1Y929	38	99	77	266	33.0435	72.8767	1.32599	0.237103	1	0.136486	0.136486	9	7	8	0.0390625	0.179688
UniRef100_Q99V14	11	30	104	335	9.56522	91.7808	1.18109	0.702134	1	0.136686	0.136686	4	2	3	0.625	1
UniRef100_A7WZ22	63	176	52	189	54.7826	51.7808	1.30103	0.240122	1	0.136786	0.136786	5	3	4	0.375	1
UniRef100_A0A173M2F6	2	1	113	364	1.73913	99.726	6.44248	0.1441	1	0.136986	0.136986	3	2	1	1	1
UniRef100_Q2FH55	22	82	93	283	80.8696	22.4658	0.816418	0.516988	1	0.137086	0.137086	10	5	8	0.109375	1
UniRef100_A0A8G2HZJ9	12	34	103	331	10.4348	90.6849	1.13421	0.718067	1	0.137186	0.137186	9	5	6	0.507812	1
UniRef100_A0A0Z2M323	12	38	103	327	10.4348	89.589	1.00255	1	1	0.137186	0.137186	5	2	4	0.375	1
UniRef100_A0A9Q4MAG5	17	42	98	323	14.7826	88.4932	1.33406	0.334198	1	0.137286	0.137286	4	2	3	0.625	1
UniRef100_A0A3A5LPT7	11	30	104	335	9.56522	91.7808	1.18109	0.702134	1	0.137286	0.137286	4	2	3	0.625	1
UniRef100_A0A9Q4UWE1	24	60	91	305	20.8696	83.5616	1.34066	0.324213	1	0.137386	0.137386	8	5	7	0.0703125	0.726562
UniRef100_A0A2S6DCI8	30	111	85	254	73.913	30.411	0.807631	0.412395	1	0.137486	0.137486	7	7	5	0.015625	0.453125
UniRef100_T1Y6D5	18	58	97	307	84.3478	15.8904	0.982225	1	1	0.137586	0.137586	5	5	1	0.0625	0.375
UniRef100_T1YD15	5	6	110	359	4.34783	98.3562	2.7197	0.143492	1	0.137686	0.137686	3	3	2	0.25	1
UniRef100_T1Y9Y1	19	60	96	305	16.5217	83.5616	1.00608	1	1	0.137886	0.137886	6	6	6	0.03125	0.03125
UniRef100_A7WZS8	69	181	46	184	60	50.411	1.52486	0.05461	1	0.137986	0.137986	20	17	9	0.00257683	0.823803
UniRef100_P63575	11	30	104	335	9.56522	91.7808	1.18109	0.702134	1	0.137986	0.137986	4	2	3	0.625	1
UniRef100_A0A166KXS2	12	36	103	329	10.4348	90.137	1.06472	0.85927	1	0.138086	0.138086	4	2	3	0.625	1
UniRef100_A0A9Q4UCH4	12	56	103	309	89.5652	15.3425	0.642857	0.221062	1	0.138186	0.138186	4	2	3	0.625	1
UniRef100_Q6GJZ6	11	30	104	335	9.56522	91.7808	1.18109	0.702134	1	0.138186	0.138186	8	7	4	0.0703125	1
UniRef100_A0A390U749	11	30	104	335	9.56522	91.7808	1.18109	0.702134	1	0.138186	0.138186	4	2	3	0.625	1
UniRef100_Q6GKS6	10	32	105	333	91.3043	8.76712	0.991071	1	1	0.138286	0.138286	4	2	3	0.625	1
UniRef100_A0A5D3UEU8	13	62	102	303	88.6957	16.9863	0.622865	0.18441	1	0.138386	0.138386	4	3	4	0.125	0.625
UniRef100_A0A9Q4UA05	2	13	113	352	98.2609	3.56164	0.479238	0.53864	1	0.138386	0.138386	12	2	11	0.00634766	0.0385742
UniRef100_A0A380EHG4	2	1	113	364	1.73913	99.726	6.44248	0.1441	1	0.138486	0.138486	3	2	1	1	1
UniRef100_A0A9N8IAG8	2	1	113	364	1.73913	99.726	6.44248	0.1441	1	0.138486	0.138486	3	2	1	1	1
UniRef100_A0A9Q4MH39	20	41	95	324	17.3913	88.7671	1.66367	0.107156	1	0.138586	0.138586	4	4	1	0.125	0.625
UniRef100_A0A0U1MWA3	15	46	100	319	13.0435	87.3973	1.04022	0.873604	1	0.138586	0.138586	4	4	2	0.125	1
UniRef100_A0A9Q1TAU1	0	13	115	352	100	3.56164	0	0.0448461	1	0.138786	0.138786	7	0	7	0.015625	0.015625
UniRef100_Q2G297	63	221	52	144	45.2174	60.5479	0.789419	0.278717	1	0.138786	0.138786	16	11	12	0.0768127	0.210114
UniRef100_A0A2U0IM68	11	29	104	336	9.56522	92.0548	1.22546	0.565608	1	0.138786	0.138786	3	2	3	0.25	1
UniRef100_Q2FG95	108	323	7	42	93.913	11.5068	2.00619	0.112111	1	0.138886	0.138886	29	25	6	0.000103716	0.0023157
UniRef100_A0A9Q4U720	12	56	103	309	89.5652	15.3425	0.642857	0.221062	1	0.138886	0.138886	4	2	3	0.625	1
UniRef100_A0A0E1VK14	10	42	105	323	91.3043	11.5068	0.732426	0.492179	1	0.138886	0.138886	4	2	3	0.625	1
UniRef100_A0A3M9H3Z7	15	42	100	323	13.0435	88.4932	1.15357	0.624085	1	0.138986	0.138986	8	4	6	0.289062	1
UniRef100_A0A9Q7Y9E1	10	38	105	327	91.3043	10.411	0.819549	0.722104	1	0.138986	0.138986	3	2	3	0.25	1
UniRef100_A0A7Z7R0T2	11	27	104	338	9.56522	92.6027	1.32407	0.433976	1	0.139086	0.139086	9	8	4	0.0390625	1
UniRef100_A0A114L1E3	12	38	103	327	10.4348	89.589	1.00255	1	1	0.139186	0.139186	5	2	4	0.375	1
UniRef100_A0A0U1MYP1	8	40	107	325	93.0435	10.9589	0.607477	0.284295	1	0.139286	0.139286	6	2	5	0.21875	0.6875
UniRef100_A0A389XW91	14	35	101	330	12.1739	90.411	1.30693	0.479584	1	0.139286	0.139286	5	3	4	0.375	1
UniRef100_Q6GDN4	12	36	103	329	10.4348	90.137	1.06472	0.85927	1	0.139286	0.139286	4	2	3	0.625	1
UniRef100_A0A0D6HBV5	6	20	109	345	94.7826	5.47945	0.949541	1	1	0.139386	0.139386	4	2	3	0.625	1
UniRef100_A0A0D6HSH1	44	113	71	252	38.2609	69.0411	1.38203	0.171229	1	0.139586	0.139586	8	6	7	0.0703125	0.289062
UniRef100_A0A113SL96	12	36	103	329	10.4348	90.137	1.06472	0.85927	1	0.139686	0.139686	4	2	3	0.625	1
UniRef100_Q6GDN3	24	78	91	287	79.1304	21.3699	0.970414	1	1	0.139686	0.139686	6	3	5	0.21875	1
UniRef100_Q6GIC8	12	39	103	326	89.5652	10.6849	0.973861	1	1	0.139786	0.139786	5	2	4	0.375	1
UniRef100_C4B4R6	12	56	103	309	89.5652	15.3425	0.642857	0.221062	1	0.139886	0.139886	4	2	3	0.625	1
UniRef100_Q6GEE5	12	36	103	329	10.4348	90.137	1.06472	0.85927	1	0.140086	0.140086	4	2	3	0.625	1
UniRef100_UPI0005BCB375	1	1	114	364	0.869565	99.726	3.19298	0.422147	1	0.140186	0.140186	1	1	1	1	1
UniRef100_UPI000B2B88C3	2	1	113	364	1.73913	99.726	6.44248	0.1441	1	0.140286	0.140286	3	2	1	1	1
UniRef100_UPI0006ECF5E5	2	1	113	364	1.73913	99.726	6.44248	0.1441	1	0.140286	0.140286	3	2	1	1	1
UniRef100_A0A133Q3H1	99	294	16	71	86.087	19.4521	1.49426	0.211962	1	0.140486	0.140486	9	9	3	0.00390625	0.507812
UniRef100_A0A9Q4MCF7	17	42	98	323	14.7826	88.4932	1.33406	0.334198	1	0.140486	0.140486	4	2	3	0.625	1
UniRef100_Q53687	114	357	1	8	99.1304	2.19178	2.55462	0.693512	1	0.140486	0.140486	8	8	1	0.0078125	0.0703125
UniRef100_A0A641A664	2	4	113	361	1.73913	98.9041	1.59735	0.633105	1	0.140586	0.140586	2	2	2	0.5	0.5
UniRef100_Q6GBE7	2	4	113	361	1.73913	98.9041	1.59735	0.633105	1	0.140586	0.140586	2	2	2	0.5	0.5
UniRef100_A0A513ZY10	2	1	113	364	1.73913	99.726	6.44248	0.1441	1	0.140686	0.140686	3	2	1	1	1
UniRef100_A0A0D6GZH0	6	20	109	345	94.7826	5.47945	0.949541	1	1	0.140686	0.140686	4	1	3	0.625	0.625
UniRef100_UPI0002431B38	11	25	104	340	9.56522	93.1507	1.43846	0.317579	1	0.140786	0.140786	5	4	5	0.0625	0.375
UniRef100_A0A9Q2TVR3	17	42	98	323	14.7826	88.4932	1.33406	0.334198	1	0.140786	0.140786	4	2	3	0.625	1
UniRef100_A0A9Q4YLQ1	8	17	107	348	6.95652	95.3425	1.53051	0.339394	1	0.140786	0.140786	7	6	4	0.125	1
UniRef100_A0A2Y1AZB9	15	40	100	325	13.0435	89.0411	1.21875	0.614399	1	0.140786	0.140786	18	11	9	0.480682	1
UniRef100_Q2FFT3	10	29	105	336	8.69565	92.0548	1.10345	0.844979	1	0.140986	0.140986	9	4	7	0.179688	1
UniRef100_Q93SM2	5	17	110	348	95.6522	4.65753	0.930481	1	1	0.140986	0.140986	4	1	3	0.625	0.625
UniRef100_A0A0H3KDN7	2	16	113	349	98.2609	4.38356	0.386062	0.264901	1	0.141186	0.141186	16	2	14	0.00418091	0.00418091
UniRef100_A0A9Q4Y6V1	10	46	105	319	91.3043	12.6027	0.660455	0.318115	1	0.141186	0.141186	8	4	5	0.726562	1
UniRef100_A0A0E1VQM0	10	43	105	322	91.3043	11.7808	0.713178	0.398775	1	0.141186	0.141186	4	2	3	0.625	1
UniRef100_M1SNY9	2	1	113	364	1.73913	99.726	6.44248	0.1441	1	0.141386	0.141386	3	2	1	1	1
UniRef100_A0A9Q8DIL9	10	39	105	326	91.3043	10.6849	0.796093	0.60061	1	0.141486	0.141486	4	2	3	0.625	1
UniRef100_A0A0U1MF40	12	58	103	307	89.5652	15.8904	0.616672	0.173539	1	0.141586	0.141586	4	2	3	0.625	1
UniRef100_A0A4S5B932	12	28	103	337	10.4348	92.3288	1.40222	0.338869	1	0.141586	0.141586	6	5	1	0.21875	0.21875
UniRef100_P20710	11	39	104	326	90.4348	10.6849	0.884122	0.861473	1	0.141586	0.141586	37	10	30	0.000191076	0.00763208
UniRef100_A0FIM0	11	37	104	328	90.4348	10.137	0.93763	1	1	0.141586	0.141586	7	4	5	0.453125	1
UniRef100_X5E3A4	69	203	46	162	60	44.3836	1.19704	0.450551	1	0.141686	0.141686	14	14	5	0.00012207	0.42395
UniRef100_Q6GEW8	12	36	103	329	10.4348	90.137	1.06472	0.85927	1	0.141686	0.141686	4	2	3	0.625	1
UniRef100_A0A9N8NK60	0	9	115	356	100	2.46575	0	0.122746	1	0.141786	0.141786	6	0	6	0.03125	0.03125
UniRef100_A0A6K9B2I4	22	51	93	314	19.1304	86.0274	1.45646	0.182644	1	0.141786	0.141786	4	4	2	0.125	1
UniRef100_A0A9N8I5M2	12	56	103	309	89.5652	15.3425	0.642857	0.221062	1	0.141786	0.141786	4	2	3	0.625	1
UniRef100_A0A9Q4MG88	17	42	98	323	14.7826	88.4932	1.33406	0.334198	1	0.141786	0.141786	4	2	3	0.625	1
UniRef100_W8U8M0	64	191	51	174	55.6522	47.6712	1.14321	0.592362	1	0.141786	0.141786	15	12	6	0.0351562	0.607239
UniRef100_P63940	11	30	104	335	9.56522	91.7808	1.18109	0.702134	1	0.141786	0.141786	4	2	3	0.625	1
UniRef100_A0A9Q7Y9Q5	10	38	105	327	91.3043	10.411	0.819549	0.722104	1	0.141786	0.141786	4	2	3	0.625	1
UniRef100_UPI0005C58FE3	10	43	105	322	91.3043	11.7808	0.713178	0.398775	1	0.141886	0.141886	4	2	3	0.625	1
UniRef100_A0A0D6WF60	19	51	96	314	16.5217	86.0274	1.21855	0.544603	1	0.141886	0.141886	5	2	4	0.375	1
UniRef100_UPI00272E74B8	2	1	113	364	1.73913	99.726	6.44248	0.1441	1	0.141986	0.141986	3	2	1	1	1
UniRef100_W8TTC0	112	341	3	24	97.3913	6.57534	2.62757	0.161063	1	0.141986	0.141986	17	16	3	0.000274658	0.0127258
UniRef100_A0A855LB09	2	1	113	364	1.73913	99.726	6.44248	0.1441	1	0.142086	0.142086	3	2	1	1	1
UniRef100_R9QT49	12	30	103	335	10.4348	91.7808	1.30097	0.453217	1	0.142086	0.142086	18	7	14	0.0308838	0.480682
UniRef100_A0A0H2X0T7	67	174	48	191	58.2609	52.3288	1.53221	0.0542803	1	0.142186	0.142186	9	9	1	0.00390625	0.0390625
UniRef100_A0A0U1MDZ3	14	45	101	320	87.8261	12.3288	0.985699	1	1	0.142186	0.142186	10	9	1	0.0214844	0.0214844
UniRef100_A0A166L3M0	31	79	84	286	26.9565	78.3562	1.33605	0.253037	1	0.142286	0.142286	5	3	4	0.375	1
UniRef100_Q6GE75	12	36	103	329	10.4348	90.137	1.06472	0.85927	1	0.142286	0.142286	4	2	3	0.625	1
UniRef100_A0A0C6E6F0	3	9	112	356	2.6087	97.5342	1.05952	1	1	0.142286	0.142286	4	1	4	0.125	0.625
UniRef100_UPI0004AE25ED	2	1	113	364	1.73913	99.726	6.44248	0.1441	1	0.142386	0.142386	3	2	1	1	1
UniRef100_A0A0D1IBR6	2	1	113	364	1.73913	99.726	6.44248	0.1441	1	0.142386	0.142386	3	2	1	1	1
UniRef100_UPI000452FB05	2	1	113	364	1.73913	99.726	6.44248	0.1441	1	0.142386	0.142386	3	2	1	1	1
UniRef100_A7X451	114	352	1	13	99.1304	3.56164	4.21023	0.20438	1	0.142386	0.142386	12	11	1	0.00634766	0.00634766
UniRef100_A0A391M7N5	12	32	103	333	10.4348	91.2329	1.21238	0.581101	1	0.142486	0.142486	4	2	3	0.625	1
UniRef100_UPI00069BEB57	5	4	110	361	4.34783	98.9041	4.10227	0.0397493	1	0.142586	0.142586	7	4	3	1	1
UniRef100_A0A389XQD2	14	35	101	330	12.1739	90.411	1.30693	0.479584	1	0.142686	0.142686	5	3	4	0.375	1
UniRef100_A0A0E1VM12	13	41	102	324	11.3043	88.7671	1.00717	1	1	0.142686	0.142686	6	6	2	0.03125	0.6875
UniRef100_A0A3A3A7V7	11	30	104	335	9.56522	91.7808	1.18109	0.702134	1	0.142786	0.142786	4	2	3	0.625	1
UniRef100_A0A0E1VHI9	13	49	102	316	88.6957	13.4247	0.821929	0.634193	1	0.142986	0.142986	5	3	4	0.375	1
UniRef100_A0A1M3SDW3	11	40	104	325	90.4348	10.9589	0.859375	0.732066	1	0.142986	0.142986	9	3	8	0.0390625	0.507812
UniRef100_A0A513ZXY9	2	1	113	364	1.73913	99.726	6.44248	0.1441	1	0.143186	0.143186	3	2	1	1	1
UniRef100_Q2G2X2	113	364	2	1	1.73913	99.726	0.15522	0.1441	1	0.143186	0.143186	3	1	2	1	1
UniRef100_A0A9N8FEQ0	12	58	103	307	89.5652	15.8904	0.616672	0.173539	1	0.143186	0.143186	4	2	3	0.625	1
UniRef100_W8TWM6	72	218	43	147	62.6087	40.274	1.12908	0.661977	1	0.143186	0.143186	5	3	4	0.375	1
UniRef100_A0A0E1X4W3	14	31	101	334	12.1739	91.5068	1.49345	0.270483	1	0.143286	0.143286	7	7	1	0.015625	0.125
UniRef100_A0A9P1SCU5	8	33	107	332	93.0435	9.0411	0.752195	0.569564	1	0.143286	0.143286	5	3	4	0.375	1
UniRef100_UPI001C29AFB6	3	1	112	364	2.6087	99.726	9.75	0.0444233	1	0.143386	0.143386	2	2	0	0.5	0.5
UniRef100_Q5HFV0	113	364	2	1	1.73913	99.726	0.15522	0.1441	1	0.143486	0.143486	3	1	2	1	1
UniRef100_A0A0E3T9K5	2	1	113	364	1.73913	99.726	6.44248	0.1441	1	0.143486	0.143486	3	2	1	1	1
UniRef100_A0A9Q7VAC7	2	2	113	363	1.73913	99.4521	3.21239	0.243777	1	0.143586	0.143586	3	2	2	1	1
UniRef100_UPI001C58BC08	2	1	113	364	1.73913	99.726	6.44248	0.1441	1	0.143686	0.143686	3	2	1	1	1
UniRef100_A0A0E1X984	12	36	103	329	10.4348	90.137	1.06472	0.85927	1	0.143686	0.143686	4	2	3	0.625	1
UniRef100_T1YCF6	20	51	95	314	17.3913	86.0274	1.29618	0.368796	1	0.143786	0.143786	6	4	5	0.21875	0.6875
UniRef100_A0A0E7Q410	21	54	94	311	18.2609	85.2055	1.28664	0.378876	1	0.143786	0.143786	8	5	6	0.289062	0.726562
UniRef100_S4SVE6	2	9	113	356	98.2609	2.46575	0.700098	1	1	0.143786	0.143786	8	1	8	0.0078125	0.0703125
UniRef100_D2JLH1	2	1	113	364	1.73913	99.726	6.44248	0.1441	1	0.143886	0.143886	3	2	1	1	1
UniRef100_A0A8S1I508	2	1	113	364	1.73913	99.726	6.44248	0.1441	1	0.143886	0.143886	3	2	1	1	1
UniRef100_A0A0E0VMT9	2	23	113	342	98.2609	6.30137	0.263178	0.0563696	1	0.143986	0.143986	4	2	3	0.625	1
UniRef100_A0A7U4SX14	12	36	103	329	10.4348	90.137	1.06472	0.85927	1	0.143986	0.143986	4	2	3	0.625	1
UniRef100_A0A513ZXX8	2	1	113	364	1.73913	99.726	6.44248	0.1441	1	0.144086	0.144086	3	2	1	1	1
UniRef100_A0A513ZXY3	2	1	113	364	1.73913	99.726	6.44248	0.1441	1	0.144086	0.144086	3	2	1	1	1
UniRef100_A0A899IQV8	2	1	113	364	1.73913	99.726	6.44248	0.1441	1	0.144086	0.144086	3	2	1	1	1
UniRef100_UPI000386C400	2	1	113	364	1.73913	99.726	6.44248	0.1441	1	0.144086	0.144086	3	2	1	1	1
UniRef100_A0A0U1MRP8	12	58	103	307	89.5652	15.8904	0.616672	0.173539	1	0.144086	0.144086	4	2	3	0.625	1
UniRef100_A0A9Q4QPX3	17	42	98	323	14.7826	88.4932	1.33406	0.334198	1	0.144086	0.144086	4	2	3	0.625	1
UniRef100_A0A3Q9R7Q8	2	1	113	364	1.73913	99.726	6.44248	0.1441	1	0.144286	0.144286	3	2	1	1	1
UniRef100_A0A3Q9R7S5	2	1	113	364	1.73913	99.726	6.44248	0.1441	1	0.144286	0.144286	3	2	1	1	1
UniRef100_A0A3Q9R7X7	2	1	113	364	1.73913	99.726	6.44248	0.1441	1	0.144286	0.144286	3	2	1	1	1
UniRef100_A0A3Q9R833	2	1	113	364	1.73913	99.726	6.44248	0.1441	1	0.144286	0.144286	3	2	1	1	1
UniRef100_A0A3T0IIA9	2	1	113	364	1.73913	99.726	6.44248	0.1441	1	0.144286	0.144286	3	2	1	1	1
UniRef100_A0A3T0IIG3	2	1	113	364	1.73913	99.726	6.44248	0.1441	1	0.144286	0.144286	3	2	1	1	1
UniRef100_A0A517JRL4	2	1	113	364	1.73913	99.726	6.44248	0.1441	1	0.144286	0.144286	3	2	1	1	1
UniRef100_A0A8E1Z7Q7	2	1	113	364	1.73913	99.726	6.44248	0.1441	1	0.144286	0.144286	3	2	1	1	1
UniRef100_UPI0004460685	2	1	113	364	1.73913	99.726	6.44248	0.1441	1	0.144286	0.144286	3	2	1	1	1
UniRef100_UPI00044D1497	2	1	113	364	1.73913	99.726	6.44248	0.1441	1	0.144286	0.144286	3	2	1	1	1
UniRef100_A0A3Q9R7R2	2	1	113	364	1.73913	99.726	6.44248	0.1441	1	0.144286	0.144286	3	2	1	1	1
UniRef100_A0A9Q2TTX1	2	1	113	364	1.73913	99.726	6.44248	0.1441	1	0.144286	0.144286	3	2	1	1	1
UniRef100_A0A7Z7QY31	12	36	103	329	10.4348	90.137	1.06472	0.85927	1	0.144286	0.144286	4	2	3	0.625	1
UniRef100_Q6GGY3	12	36	103	329	10.4348	90.137	1.06472	0.85927	1	0.144386	0.144386	4	2	3	0.625	1
UniRef100_A0A0C6E6E3	3	9	112	356	2.6087	97.5342	1.05952	1	1	0.144386	0.144386	4	1	4	0.125	0.625
UniRef100_Q7WU25	2	1	113	364	1.73913	99.726	6.44248	0.1441	1	0.144486	0.144486	3	2	1	1	1
UniRef100_T1Y998	13	34	102	331	11.3043	90.6849	1.24077	0.58925	1	0.144486	0.144486	10	8	7	0.109375	0.34375
UniRef100_A0A7D5PP26	24	56	91	309	20.8696	84.6575	1.45526	0.196001	1	0.144586	0.144586	10	8	7	0.109375	0.34375
UniRef100_Q6GEH2	12	36	103	329	10.4348	90.137	1.06472	0.85927	1	0.144686	0.144686	4	2	3	0.625	1
UniRef100_A0A6B5H1L4	2	1	113	364	1.73913	99.726	6.44248	0.1441	1	0.144786	0.144786	3	2	1	1	1
UniRef100_UPI0002477E7A	2	1	113	364	1.73913	99.726	6.44248	0.1441	1	0.144786	0.144786	3	2	1	1	1
UniRef100_A0A9P1WIJ1	2	1	113	364	1.73913	99.726	6.44248	0.1441	1	0.144786	0.144786	3	2	1	1	1
UniRef100_UPI0007DD06E1	10	42	105	323	91.3043	11.5068	0.732426	0.492179	1	0.144786	0.144786	4	2	3	0.625	1
UniRef100_UPI00024C3592	2	4	113	361	1.73913	98.9041	1.59735	0.633105	1	0.144786	0.144786	3	2	2	1	1
UniRef100_UPI00044D51E9	2	1	113	364	1.73913	99.726	6.44248	0.1441	1	0.144886	0.144886	3	2	1	1	1
UniRef100_A0A167JR25	12	36	103	329	10.4348	90.137	1.06472	0.85927	1	0.144986	0.144986	4	2	3	0.625	1
UniRef100_UPI0001C0BF06	2	1	113	364	1.73913	99.726	6.44248	0.1441	1	0.145085	0.145085	3	2	1	1	1
UniRef100_A0A3S7GV89	2	1	113	364	1.73913	99.726	6.44248	0.1441	1	0.145085	0.145085	3	2	1	1	1
UniRef100_A0A9Q4MCL3	24	54	91	311	20.8696	85.2055	1.51893	0.146613	1	0.145185	0.145185	6	5	4	0.21875	0.6875
UniRef100_A0A0U1MRD1	12	56	103	309	89.5652	15.3425	0.642857	0.221062	1	0.145185	0.145185	4	2	3	0.625	1
UniRef100_A0A9Q7Y1X6	10	38	105	327	91.3043	10.411	0.819549	0.722104	1	0.145185	0.145185	4	2	3	0.625	1
UniRef100_A0A6B5KRL6	6	23	109	342	94.7826	6.30137	0.818508	0.823701	1	0.145185	0.145185	23	5	20	0.000488281	0.010622
UniRef100_Q6GEZ1	11	32	104	333	9.56522	91.2329	1.10066	0.85153	1	0.145185	0.145185	5	3	4	0.375	1
UniRef100_A0A9N8IAI8	2	1	113	364	1.73913	99.726	6.44248	0.1441	1	0.145385	0.145385	3	2	1	1	1
UniRef100_A0A0Z4IKD9	2	1	113	364	1.73913	99.726	6.44248	0.1441	1	0.145385	0.145385	3	2	1	1	1
UniRef100_A0A9P1WJ07	10	38	105	327	91.3043	10.411	0.819549	0.722104	1	0.145385	0.145385	4	2	3	0.625	1
UniRef100_A0A9Q4UZV3	21	48	94	317	18.2609	86.8493	1.4754	0.173368	1	0.145485	0.145485	5	3	4	0.375	1
UniRef100_A0A345AMG4	3	3	112	362	2.6087	99.1781	3.23214	0.152027	1	0.145585	0.145585	3	3	2	0.25	1
UniRef100_UPI000243227E	3	3	112	362	2.6087	99.1781	3.23214	0.152027	1	0.145585	0.145585	3	3	2	0.25	1
UniRef100_Q6GJW4	12	36	103	329	10.4348	90.137	1.06472	0.85927	1	0.145585	0.145585	4	2	3	0.625	1
UniRef100_UPI00021AE880	2	1	113	364	1.73913	99.726	6.44248	0.1441	1	0.145685	0.145685	3	2	1	1	1
UniRef100_A0A8S1I823	2	1	113	364	1.73913	99.726	6.44248	0.1441	1	0.145685	0.145685	3	2	1	1	1
UniRef100_A0A6D2GRP6	4	5	111	360	3.47826	98.6301	2.59459	0.227792	1	0.145685	0.145685	5	4	5	0.0625	0.375
UniRef100_UPI00090F3AF7	1	1	114	364	0.869565	99.726	3.19298	0.422147	1	0.145685	0.145685	1	1	1	1	1
UniRef100_M1XIG8	3	5	112	360	2.6087	98.6301	1.92857	0.404594	1	0.145785	0.145785	3	3	2	0.25	1
UniRef100_A0A9Q7Y3V6	12	39	103	326	89.5652	10.6849	0.973861	1	1	0.145885	0.145885	5	2	4	0.375	1
UniRef100_Q6GJB6	14	30	101	335	12.1739	91.7808	1.54785	0.198964	1	0.145985	0.145985	7	7	1	0.015625	0.125
UniRef100_Q6Y0Q6	7	30	108	335	93.913	8.21918	0.723765	0.550626	1	0.145985	0.145985	8	3	5	0.726562	0.726562
UniRef100_Q6GJF7	12	36	103	329	10.4348	90.137	1.06472	0.85927	1	0.145985	0.145985	4	2	3	0.625	1
UniRef100_A0A6H3QA19	3	3	112	362	2.6087	99.1781	3.23214	0.152027	1	0.146085	0.146085	6	3	3	1	1
UniRef100_A0A0E1XJJ7	5	29	110	336	95.6522	7.94521	0.526646	0.217535	1	0.146085	0.146085	19	5	16	0.00442505	0.0635681
UniRef100_A0A9Q7YAE9	4	22	111	343	96.5217	6.0274	0.561835	0.353119	1	0.146085	0.146085	5	2	4	0.375	1
UniRef100_A0A131HPW1	12	36	103	329	10.4348	90.137	1.06472	0.85927	1	0.146085	0.146085	4	2	3	0.625	1
UniRef100_A0A166IU43	12	36	103	329	10.4348	90.137	1.06472	0.85927	1	0.146185	0.146185	4	2	3	0.625	1
UniRef100_W8TMM2	81	248	34	117	70.4348	32.0548	1.12393	0.646671	1	0.146285	0.146285	8	5	6	0.289062	0.726562
UniRef100_A0A7Z7W130	16	51	99	314	86.087	13.9726	0.995049	1	1	0.146285	0.146285	7	3	7	0.015625	1
UniRef100_A0A0E1VYN2	10	43	105	322	91.3043	11.7808	0.713178	0.398775	1	0.146385	0.146385	4	2	3	0.625	1
UniRef100_A0A7Z7QY07	12	36	103	329	10.4348	90.137	1.06472	0.85927	1	0.146385	0.146385	4	2	3	0.625	1
UniRef100_A0A2S6DRW9	2	23	113	342	98.2609	6.30137	0.263178	0.0563696	1	0.146485	0.146485	4	2	3	0.625	1
UniRef100_UPI000241E85D	3	4	112	361	2.6087	98.9041	2.41741	0.366061	1	0.146485	0.146485	3	3	1	0.25	1
UniRef100_A0A131IYM2	10	32	105	333	91.3043	8.76712	0.991071	1	1	0.146485	0.146485	4	2	3	0.625	1
UniRef100_A0A181HN05	23	58	92	307	20	84.1096	1.32328	0.318846	1	0.146585	0.146585	10	9	5	0.0214844	1
UniRef100_UPI000451A880	8	16	107	349	6.95652	95.6164	1.63084	0.324501	1	0.146585	0.146585	5	3	4	0.375	1
UniRef100_A0A659I8W0	9	24	106	341	7.82609	93.4247	1.20637	0.673275	1	0.146585	0.146585	7	6	6	0.125	0.125
UniRef100_A7X579	114	354	1	11	99.1304	3.0137	3.54237	0.309308	1	0.146685	0.146685	8	8	1	0.0078125	0.0703125
UniRef100_UPI000243271C	3	7	112	358	2.6087	98.0822	1.3699	0.708804	1	0.146685	0.146685	3	3	3	0.25	0.25
UniRef100_A0A0U1MS68	12	58	103	307	89.5652	15.8904	0.616672	0.173539	1	0.146785	0.146785	4	2	3	0.625	1
UniRef100_Q9RQG6	5	18	110	347	95.6522	4.93151	0.876263	1	1	0.146785	0.146785	4	1	3	0.625	0.625
UniRef100_A0A641A6Q7	10	18	105	347	8.69565	95.0685	1.83598	0.168471	1	0.146885	0.146885	4	4	3	0.125	0.625
UniRef100_A7X3A1	113	364	2	1	1.73913	99.726	0.15522	0.1441	1	0.146985	0.146985	3	1	2	1	1
UniRef100_UPI0005E93D92	2	1	113	364	1.73913	99.726	6.44248	0.1441	1	0.147085	0.147085	3	2	1	1	1
UniRef100_A0A9N8FDB0	12	56	103	309	89.5652	15.3425	0.642857	0.221062	1	0.147085	0.147085	4	2	3	0.625	1
UniRef100_A0A641A780	4	9	111	356	3.47826	97.5342	1.42543	0.521608	1	0.147085	0.147085	3	3	2	0.25	1
UniRef100_A0A9Q4Y784	2	13	113	352	98.2609	3.56164	0.479238	0.53864	1	0.147085	0.147085	11	2	10	0.0117188	0.0654297
UniRef100_A0A6B1RTN9	2	8	113	357	98.2609	2.19178	0.789823	1	1	0.147085	0.147085	2	2	2	0.5	0.5
UniRef100_A0A9N8II70	11	30	104	335	9.56522	91.7808	1.18109	0.702134	1	0.147285	0.147285	4	2	3	0.625	1
UniRef100_A9CRA5	2	1	113	364	1.73913	99.726	6.44248	0.1441	1	0.147385	0.147385	3	2	1	1	1
UniRef100_C5I648	3	3	112	362	2.6087	99.1781	3.23214	0.152027	1	0.147485	0.147485	6	3	3	1	1
UniRef100_A0A6D2GR76	0	8	115	357	100	2.19178	0	0.207841	1	0.147485	0.147485	7	0	7	0.015625	0.015625
UniRef100_A0A7R6SN31	3	13	112	352	97.3913	3.56164	0.725275	0.771956	1	0.147485	0.147485	11	3	10	0.0117188	0.226562
UniRef100_R4II65	2	1	113	364	1.73913	99.726	6.44248	0.1441	1	0.147685	0.147685	3	2	1	1	1
UniRef100_UPI000DA84A8C	2	1	113	364	1.73913	99.726	6.44248	0.1441	1	0.147685	0.147685	3	2	1	1	1
UniRef100_A0A2Z4WNA9	2	1	113	364	1.73913	99.726	6.44248	0.1441	1	0.147685	0.147685	3	2	1	1	1
UniRef100_A0A2Y2N3Y8	23	69	92	296	20	81.0959	1.07246	0.787036	1	0.147685	0.147685	5	3	4	0.375	1
UniRef100_A0A168R507	12	36	103	329	10.4348	90.137	1.06472	0.85927	1	0.147685	0.147685	4	2	3	0.625	1
UniRef100_A0A0E1X6X8	12	36	103	329	10.4348	90.137	1.06472	0.85927	1	0.147685	0.147685	4	2	3	0.625	1
UniRef100_A0A131JQE4	14	31	101	334	12.1739	91.5068	1.49345	0.270483	1	0.147785	0.147785	7	7	1	0.015625	0.125
UniRef100_A0A830Z7Y1	6	20	109	345	94.7826	5.47945	0.949541	1	1	0.147785	0.147785	4	2	3	0.625	1
UniRef100_A0A9Q1T9R8	0	9	115	356	100	2.46575	0	0.122746	1	0.147885	0.147885	6	0	6	0.03125	0.03125
UniRef100_A0A0E1VJ13	1	11	114	354	99.1304	3.0137	0.282297	0.309308	1	0.147885	0.147885	12	1	11	0.00634766	0.00634766
UniRef100_T1YB61	2	9	113	356	98.2609	2.46575	0.700098	1	1	0.147885	0.147885	8	2	7	0.0703125	0.289062
UniRef100_A0A7Y6JQR4	2	1	113	364	1.73913	99.726	6.44248	0.1441	1	0.147985	0.147985	3	2	1	1	1
UniRef100_A0A9Q2TU56	3	3	112	362	2.6087	99.1781	3.23214	0.152027	1	0.148085	0.148085	6	3	3	1	1
UniRef100_Q7A1Q7	75	210	40	155	65.2174	42.4658	1.38393	0.157653	1	0.148085	0.148085	19	16	6	0.00442505	0.167068
UniRef100_Q6GKE0	27	101	88	264	76.5217	27.6712	0.80198	0.399788	1	0.148185	0.148185	6	3	5	0.21875	1
UniRef100_P65407	13	32	102	333	11.3043	91.2329	1.32629	0.462856	1	0.148185	0.148185	7	6	4	0.125	1
UniRef100_A0A122UYX5	1	8	114	357	99.1304	2.19178	0.391447	0.693512	1	0.148185	0.148185	7	1	7	0.015625	0.125
UniRef100_A0A9Q3MSL5	4	29	111	336	96.5217	7.94521	0.417521	0.137163	1	0.148385	0.148385	5	2	4	0.375	1
UniRef100_A0A6F8Z5D5	2	1	113	364	1.73913	99.726	6.44248	0.1441	1	0.148485	0.148485	3	2	1	1	1
UniRef100_Q8KVS8	12	36	103	329	10.4348	90.137	1.06472	0.85927	1	0.148485	0.148485	7	3	6	0.125	1
UniRef100_A0A9Q4MCV2	19	47	96	318	16.5217	87.1233	1.3391	0.351739	1	0.148585	0.148585	5	3	4	0.375	1
UniRef100_A0A0H3K956	26	77	89	288	22.6087	78.9041	1.09266	0.794546	1	0.148585	0.148585	11	9	5	0.0654297	1
UniRef100_A0A9N8FCT8	12	56	103	309	89.5652	15.3425	0.642857	0.221062	1	0.148785	0.148785	4	2	3	0.625	1
UniRef100_A0A166EPD7	16	63	99	302	86.087	17.2603	0.774731	0.471627	1	0.148885	0.148885	4	2	3	0.625	1
UniRef100_A0A9N8FDQ3	14	50	101	315	87.8261	13.6986	0.873267	0.754527	1	0.148885	0.148885	10	8	4	0.109375	0.753906
UniRef100_A0A641AA60	34	111	81	254	70.4348	30.411	0.960516	0.907661	1	0.148885	0.148885	11	7	8	0.226562	0.548828
UniRef100_A0A0U1MLC9	12	58	103	307	89.5652	15.8904	0.616672	0.173539	1	0.148985	0.148985	4	2	3	0.625	1
UniRef100_A7WYH9	12	24	103	341	10.4348	93.4247	1.65534	0.221174	1	0.148985	0.148985	8	7	2	0.0703125	0.289062
UniRef100_A0A389Q6T1	12	32	103	333	10.4348	91.2329	1.21238	0.581101	1	0.148985	0.148985	4	2	3	0.625	1
UniRef100_A0A9N8IBU8	2	1	113	364	1.73913	99.726	6.44248	0.1441	1	0.149085	0.149085	3	2	1	1	1
UniRef100_A0A7U7JUT4	2	1	113	364	1.73913	99.726	6.44248	0.1441	1	0.149085	0.149085	3	2	1	1	1
UniRef100_A0A0D1HPY2	29	86	86	279	25.2174	76.4384	1.09397	0.708677	1	0.149185	0.149185	10	9	3	0.0214844	0.34375
UniRef100_A0A0E1VJX9	14	54	101	311	87.8261	14.7945	0.798313	0.542139	1	0.149285	0.149285	5	2	5	0.0625	1
UniRef100_P0A0C4	2	1	113	364	1.73913	99.726	6.44248	0.1441	1	0.149385	0.149385	3	2	1	1	1
UniRef100_A0A0E1X8K5	12	36	103	329	10.4348	90.137	1.06472	0.85927	1	0.149385	0.149385	3	2	3	0.25	1
UniRef100_A0A6K1MRM3	11	22	104	343	9.56522	93.9726	1.64904	0.206038	1	0.149485	0.149485	8	8	3	0.0078125	0.726562
UniRef100_Q6GCI3	4	9	111	356	3.47826	97.5342	1.42543	0.521608	1	0.149585	0.149585	3	3	2	0.25	1
UniRef100_Q7A6J6	113	364	2	1	1.73913	99.726	0.15522	0.1441	1	0.149785	0.149785	3	1	2	1	1
UniRef100_A0A898CK67	3	3	112	362	2.6087	99.1781	3.23214	0.152027	1	0.149785	0.149785	6	3	3	1	1
UniRef100_UPI0001C37C78	2	1	113	364	1.73913	99.726	6.44248	0.1441	1	0.149885	0.149885	3	2	1	1	1
UniRef100_UPI001362F9C8	2	1	113	364	1.73913	99.726	6.44248	0.1441	1	0.149985	0.149985	3	2	1	1	1
UniRef100_A0A0E1VIY9	3	3	112	362	2.6087	99.1781	3.23214	0.152027	1	0.149985	0.149985	6	3	3	1	1
UniRef100_A0A0E1VT31	3	3	112	362	2.6087	99.1781	3.23214	0.152027	1	0.149985	0.149985	6	3	3	1	1
UniRef100_A0A9P2YYB6	10	28	105	337	8.69565	92.3288	1.14626	0.695356	1	0.149985	0.149985	6	3	4	0.6875	1
UniRef100_A0A2P8X140	27	95	88	270	76.5217	26.0274	0.87201	0.624908	1	0.150085	0.150085	12	7	10	0.0385742	0.774414
UniRef100_A0A7U7EXX6	12	26	103	339	10.4348	92.8767	1.51904	0.241538	1	0.150385	0.150385	5	5	2	0.0625	1
UniRef100_UPI00024778A9	0	7	115	358	100	1.91781	0	0.204938	1	0.150485	0.150485	7	0	7	0.015625	0.015625
UniRef100_O80075	9	18	106	347	7.82609	95.0685	1.63679	0.248975	1	0.150485	0.150485	9	7	4	0.179688	1
UniRef100_A0A131J5I5	14	31	101	334	12.1739	91.5068	1.49345	0.270483	1	0.150485	0.150485	7	7	1	0.015625	0.125
UniRef100_A0A2S6D0E1	2	3	113	362	1.73913	99.1781	2.13569	0.597703	1	0.150485	0.150485	2	2	2	0.5	0.5
UniRef100_A0A0D1HMP7	2	3	113	362	1.73913	99.1781	2.13569	0.597703	1	0.150485	0.150485	2	2	2	0.5	0.5
UniRef100_W8UTZ7	35	102	80	263	30.4348	72.0548	1.12806	0.636332	1	0.150485	0.150485	13	11	8	0.0224609	0.581055
UniRef100_S4V689	3	3	112	362	2.6087	99.1781	3.23214	0.152027	1	0.150585	0.150585	6	3	3	1	1
UniRef100_B6V386	3	3	112	362	2.6087	99.1781	3.23214	0.152027	1	0.150685	0.150685	6	3	3	1	1
UniRef100_UPI0007CA21B2	4	7	111	358	3.47826	98.0822	1.84299	0.304113	1	0.150685	0.150685	4	2	4	0.125	1
UniRef100_A0A162GR70	12	35	103	330	10.4348	90.411	1.09847	0.857229	1	0.150685	0.150685	3	2	3	0.25	1
UniRef100_A0A2U0IGC6	14	28	101	337	12.1739	92.3288	1.66832	0.183447	1	0.150785	0.150785	8	7	3	0.0703125	0.726562
UniRef100_A0A9N8FC38	0	7	115	358	100	1.91781	0	0.204938	1	0.150785	0.150785	7	0	7	0.015625	0.015625
UniRef100_X5E3D5	58	160	57	205	50.4348	56.1644	1.30373	0.237917	1	0.150885	0.150885	18	15	7	0.00753784	0.480682
UniRef100_T1Y8J2	5	8	110	357	4.34783	97.8082	2.02841	0.20472	1	0.151385	0.151385	3	3	2	0.25	1
UniRef100_T1Y6L1	4	9	111	356	3.47826	97.5342	1.42543	0.521608	1	0.151385	0.151385	3	3	2	0.25	1
UniRef100_A0A9N8IMT0	0	11	115	354	100	3.0137	0	0.0739638	1	0.151485	0.151485	8	0	8	0.0078125	0.0078125
UniRef100_A0A0H2WWG8	2	1	113	364	1.73913	99.726	6.44248	0.1441	1	0.151485	0.151485	3	2	1	1	1
UniRef100_A0A9Q2TYH6	19	38	96	327	16.5217	89.589	1.70312	0.0971709	1	0.151585	0.151585	6	6	1	0.03125	0.21875
UniRef100_A0A0E1X6J7	8	28	107	337	93.0435	7.67123	0.899866	1	1	0.151585	0.151585	9	5	6	0.507812	1
UniRef100_A0A2X3N449	0	7	115	358	100	1.91781	0	0.204938	1	0.151685	0.151685	7	0	7	0.015625	0.015625
UniRef100_A0A2R3SYN9	3	5	112	360	2.6087	98.6301	1.92857	0.404594	1	0.151685	0.151685	3	3	2	0.25	1
UniRef100_A0A060PWJ3	3	5	112	360	2.6087	98.6301	1.92857	0.404594	1	0.151685	0.151685	3	3	2	0.25	1
UniRef100_I2FGE6	12	32	103	333	10.4348	91.2329	1.21238	0.581101	1	0.151685	0.151685	10	8	6	0.109375	0.753906
UniRef100_Q4ZBI5	2	1	113	364	1.73913	99.726	6.44248	0.1441	1	0.151785	0.151785	3	2	1	1	1
UniRef100_A0A122ZUC1	12	36	103	329	10.4348	90.137	1.06472	0.85927	1	0.151985	0.151985	4	2	3	0.625	1
UniRef100_Q5HCN3	61	174	54	191	53.0435	52.3288	1.24	0.336731	1	0.152185	0.152185	15	14	6	0.000976562	0.607239
UniRef100_Q2FJ74	78	263	37	102	32.1739	72.0548	0.817593	0.409855	1	0.152185	0.152185	14	13	8	0.00183105	0.790527
UniRef100_A0A0H3K7Q0	21	54	94	311	18.2609	85.2055	1.28664	0.378876	1	0.152585	0.152585	8	5	6	0.289062	0.726562
UniRef100_Q6GJN1	9	30	106	335	92.1739	8.21918	0.948113	1	1	0.152585	0.152585	10	5	6	0.753906	1
UniRef100_A0A6H3QBN4	2	1	113	364	1.73913	99.726	6.44248	0.1441	1	0.152685	0.152685	3	2	1	1	1
UniRef100_A0A513ZXW8	2	1	113	364	1.73913	99.726	6.44248	0.1441	1	0.152685	0.152685	3	2	1	1	1
UniRef100_A0A181ENE4	39	114	76	251	33.913	68.7671	1.12985	0.646392	1	0.152785	0.152785	9	6	8	0.0390625	0.507812
UniRef100_A0A6B5CSZ8	22	51	93	314	19.1304	86.0274	1.45646	0.182644	1	0.152885	0.152885	9	7	5	0.179688	1
UniRef100_D2JLD5	5	6	110	359	4.34783	98.3562	2.7197	0.143492	1	0.152985	0.152985	10	5	5	1	1
UniRef100_UPI00044623A2	2	1	113	364	1.73913	99.726	6.44248	0.1441	1	0.152985	0.152985	3	2	1	1	1
UniRef100_A0A0D1IZ30	32	100	83	265	27.8261	72.6027	1.02169	1	1	0.152985	0.152985	11	9	8	0.0654297	0.226562
UniRef100_A0A0C6ERP3	3	3	112	362	2.6087	99.1781	3.23214	0.152027	1	0.153085	0.153085	6	3	3	1	1
UniRef100_UPI000207C5D7	2	8	113	357	98.2609	2.19178	0.789823	1	1	0.153085	0.153085	2	2	2	0.5	0.5
UniRef100_A0A0H3KAU4	6	19	109	346	5.21739	94.7945	1.00241	1	1	0.153185	0.153185	4	2	3	0.625	1
UniRef100_A0A0E3T9M9	3	3	112	362	2.6087	99.1781	3.23214	0.152027	1	0.153285	0.153285	6	3	3	1	1
UniRef100_A0A0E1X5B9	13	30	102	335	11.3043	91.7808	1.4232	0.348904	1	0.153285	0.153285	7	7	2	0.015625	0.453125
UniRef100_W8U6A9	48	169	67	196	58.2609	46.3014	0.830875	0.452137	1	0.153285	0.153285	13	12	6	0.00341797	1
UniRef100_A0A0Z0PJ03	2	9	113	356	98.2609	2.46575	0.700098	1	1	0.153385	0.153385	3	1	3	0.25	1
UniRef100_UPI0004A95FC6	2	9	113	356	98.2609	2.46575	0.700098	1	1	0.153385	0.153385	2	2	1	0.5	1
UniRef100_A0A9N8IGE5	24	70	91	295	20.8696	80.8219	1.11146	0.687563	1	0.153485	0.153485	8	8	3	0.0078125	0.726562
UniRef100_A0A8G2M9C6	3	3	112	362	2.6087	99.1781	3.23214	0.152027	1	0.153685	0.153685	6	3	3	1	1
UniRef100_UPI00024317AD	19	34	96	331	16.5217	90.6849	1.92678	0.0400119	1	0.153785	0.153785	7	7	1	0.015625	0.125
UniRef100_A0A9N8FDJ1	14	51	101	314	87.8261	13.9726	0.853427	0.75478	1	0.153785	0.153785	8	8	1	0.0078125	0.0703125
UniRef100_A0A0D1GF60	51	157	64	208	44.3478	56.9863	1.05573	0.829562	1	0.153785	0.153785	13	11	6	0.0224609	1
UniRef100_A0A3A2ZYY6	2	8	113	357	98.2609	2.19178	0.789823	1	1	0.153885	0.153885	7	2	6	0.125	0.453125
UniRef100_A0A9Q4Y9Q7	2	13	113	352	98.2609	3.56164	0.479238	0.53864	1	0.154085	0.154085	11	2	10	0.0117188	0.0654297
UniRef100_A0A9N8NIR2	3	3	112	362	2.6087	99.1781	3.23214	0.152027	1	0.154285	0.154285	6	3	3	1	1
UniRef100_W8UWY3	40	103	75	262	34.7826	71.7808	1.35663	0.198713	1	0.154285	0.154285	8	5	6	0.289062	0.726562
UniRef100_T1Y9U0	3	4	112	361	2.6087	98.9041	2.41741	0.366061	1	0.154285	0.154285	4	3	3	0.625	0.625
UniRef100_A0A9Q4M987	17	35	98	330	14.7826	90.411	1.63557	0.123709	1	0.154385	0.154385	9	8	3	0.0390625	0.507812
UniRef100_K7ZRX6	5	37	110	328	95.6522	10.137	0.402948	0.0591757	1	0.154585	0.154585	11	5	8	0.226562	1
UniRef100_UPI0004AC51AF	3	4	112	361	2.6087	98.9041	2.41741	0.366061	1	0.154585	0.154585	3	3	2	0.25	1
UniRef100_A0A2S6DUK4	4	30	111	335	96.5217	8.21918	0.402402	0.0966903	1	0.154685	0.154685	6	3	5	0.21875	1
UniRef100_P60121	44	137	71	228	38.2609	62.4658	1.03136	0.912382	1	0.154685	0.154685	17	14	9	0.0127258	1
UniRef100_UPI0013B83A0F	3	8	112	357	2.6087	97.8082	1.19531	0.729662	1	0.154785	0.154785	2	2	2	0.5	0.5
UniRef100_A0A390TI60	13	27	102	338	11.3043	92.6027	1.5955	0.181604	1	0.154885	0.154885	5	5	1	0.0625	0.375
UniRef100_A0A390W146	13	25	102	340	11.3043	93.1507	1.73333	0.163436	1	0.154985	0.154985	6	6	1	0.03125	0.21875
UniRef100_W8U5G4	81	232	34	133	70.4348	36.4384	1.36575	0.216734	1	0.154985	0.154985	14	9	10	0.179565	0.42395
UniRef100_A0A390B3U3	11	23	104	342	9.56522	93.6986	1.57274	0.295661	1	0.154985	0.154985	6	6	2	0.03125	0.6875
UniRef100_A0A0E1X7A3	12	29	103	336	10.4348	92.0548	1.34985	0.444131	1	0.154985	0.154985	9	8	3	0.0390625	0.507812
UniRef100_A0A9N8FAA4	15	54	100	311	86.9565	14.7945	0.863889	0.760761	1	0.155084	0.155084	10	8	4	0.109375	0.753906
UniRef100_UPI001CC3D323	4	5	111	360	3.47826	98.6301	2.59459	0.227792	1	0.155284	0.155284	3	3	3	0.25	0.25
UniRef100_A7X2X9	30	80	85	285	26.087	78.0822	1.25735	0.374001	1	0.155284	0.155284	7	7	4	0.015625	1
UniRef100_A0A7U7EXZ1	12	33	103	332	10.4348	90.9589	1.17211	0.713709	1	0.155284	0.155284	3	1	3	0.25	1
UniRef100_UPI000CCFFD63	0	12	115	353	100	3.28767	0	0.0786526	1	0.155384	0.155384	3	0	3	0.25	0.25
UniRef100_A0A6B3IT36	3	3	112	362	2.6087	99.1781	3.23214	0.152027	1	0.155384	0.155384	6	3	3	1	1
UniRef100_A0A9N8FCR8	14	44	101	321	12.1739	87.9452	1.01125	1	1	0.155384	0.155384	9	8	1	0.0390625	0.0390625
UniRef100_A0A9Q4U9X0	2	13	113	352	98.2609	3.56164	0.479238	0.53864	1	0.155684	0.155684	11	2	10	0.0117188	0.0654297
UniRef100_A0A0D1HIQ5	45	131	70	234	39.1304	64.1096	1.14831	0.579252	1	0.155684	0.155684	12	10	7	0.0385742	0.774414
UniRef100_Q9ZAH7	24	81	91	284	79.1304	22.1918	0.924705	0.797505	1	0.155684	0.155684	6	6	3	0.03125	1
UniRef100_Q5HGP4	26	64	89	301	22.6087	82.4658	1.37395	0.221022	1	0.155884	0.155884	5	2	4	0.375	1
UniRef100_T1Y879	6	16	109	349	5.21739	95.6164	1.20069	0.798027	1	0.156284	0.156284	6	5	5	0.21875	0.21875
UniRef100_A0A0E7QX42	35	78	80	287	30.4348	78.6301	1.60978	0.0581582	1	0.156384	0.156384	8	8	4	0.0078125	1
UniRef100_A0A9P1WHV9	5	9	110	356	4.34783	97.5342	1.79798	0.339243	1	0.156384	0.156384	7	5	4	0.453125	1
UniRef100_A0A9Q7Y0U3	5	9	110	356	4.34783	97.5342	1.79798	0.339243	1	0.156384	0.156384	7	5	4	0.453125	1
UniRef100_A0A8G2I0E1	3	4	112	361	2.6087	98.9041	2.41741	0.366061	1	0.156384	0.156384	3	3	2	0.25	1
UniRef100_A0A6G4IRL0	3	4	112	361	2.6087	98.9041	2.41741	0.366061	1	0.156384	0.156384	3	3	2	0.25	1
UniRef100_A0A6G4IRC3	3	4	112	361	2.6087	98.9041	2.41741	0.366061	1	0.156384	0.156384	3	3	2	0.25	1
UniRef100_A0A8G2M8K6	3	4	112	361	2.6087	98.9041	2.41741	0.366061	1	0.156384	0.156384	3	3	2	0.25	1
UniRef100_A0A6G4IUC2	3	4	112	361	2.6087	98.9041	2.41741	0.366061	1	0.156384	0.156384	3	3	2	0.25	1
UniRef100_A0A0U1MK09	16	60	99	305	86.087	16.4384	0.821549	0.561271	1	0.156384	0.156384	3	3	2	0.25	1
UniRef100_T1Y5R2	17	51	98	314	14.7826	86.0274	1.06803	0.87821	1	0.156384	0.156384	7	6	3	0.125	1
UniRef100_A0A9Q7Y602	6	35	109	330	94.7826	9.58904	0.519004	0.180877	1	0.156584	0.156584	32	6	27	0.000113074	0.000535053
UniRef100_A0A166DHT2	34	120	81	245	70.4348	32.8767	0.856996	0.567278	1	0.156584	0.156584	9	8	4	0.0390625	1
UniRef100_A0A9Q7YBP9	7	29	108	336	93.913	7.94521	0.750958	0.684723	1	0.156584	0.156584	10	4	6	0.753906	0.753906
UniRef100_A0A9N8IGS5	8	13	107	352	6.95652	96.4384	2.02444	0.123811	1	0.156684	0.156684	11	7	4	0.548828	0.548828
UniRef100_A0A0U1MVB2	29	131	86	234	74.7826	35.8904	0.602343	0.0409022	1	0.156784	0.156784	13	7	9	0.266846	1
UniRef100_A7X5B4	103	319	12	46	89.5652	12.6027	1.23772	0.62404	1	0.156884	0.156884	8	8	1	0.0078125	0.0703125
UniRef100_A0A0U1MTD6	11	56	104	309	90.4348	15.3425	0.58362	0.125962	1	0.156984	0.156984	7	3	4	1	1
UniRef100_UPI0007CA1ADE	3	18	112	347	97.3913	4.93151	0.516369	0.432896	1	0.156984	0.156984	5	2	4	0.375	1
UniRef100_Q99R88	10	29	105	336	8.69565	92.0548	1.10345	0.844979	1	0.156984	0.156984	3	2	3	0.25	1
UniRef100_A0A0U1MRW7	13	58	102	307	88.6957	15.8904	0.674611	0.291391	1	0.157084	0.157084	6	3	5	0.21875	1
UniRef100_A0A3M9GSL0	35	93	80	272	30.4348	74.5205	1.27957	0.333367	1	0.157084	0.157084	16	14	8	0.00418091	1
UniRef100_W8U2C4	81	240	34	125	70.4348	34.2466	1.24081	0.366154	1	0.157284	0.157284	10	10	4	0.00195312	0.753906
UniRef100_A0A7U7EXQ8	9	22	106	343	7.82609	93.9726	1.32376	0.515286	1	0.157584	0.157584	4	2	4	0.125	1
UniRef100_UPI00024C318B	5	17	110	348	95.6522	4.65753	0.930481	1	1	0.157584	0.157584	5	5	4	0.0625	0.375
UniRef100_W8TRJ2	69	182	46	183	60	50.137	1.50824	0.0686211	1	0.157784	0.157784	12	11	3	0.00634766	0.145996
UniRef100_A0A390WIJ0	12	33	103	332	10.4348	90.9589	1.17211	0.713709	1	0.157784	0.157784	7	3	5	0.453125	1
UniRef100_A0A6M1ABI9	3	22	112	343	97.3913	6.0274	0.417614	0.226848	1	0.158084	0.158084	13	2	12	0.00341797	0.0224609
UniRef100_A0A0E1XF89	12	36	103	329	10.4348	90.137	1.06472	0.85927	1	0.158084	0.158084	4	2	3	0.625	1
UniRef100_A0A098GYX8	3	3	112	362	2.6087	99.1781	3.23214	0.152027	1	0.158184	0.158184	6	3	3	1	1
UniRef100_W8U9H5	92	268	23	97	80	26.5753	1.44776	0.175138	1	0.158184	0.158184	11	6	7	0.548828	1
UniRef100_W8UB09	32	80	83	285	27.8261	78.0822	1.37349	0.206785	1	0.158184	0.158184	7	7	4	0.015625	1
UniRef100_W8U5C9	16	59	99	306	86.087	16.1644	0.838213	0.659186	1	0.158184	0.158184	7	5	3	0.453125	1
UniRef100_A0A9N8FDB8	5	5	110	360	4.34783	98.6301	3.27273	0.0645055	1	0.158484	0.158484	4	4	2	0.125	1
UniRef100_UPI0004B45035	2	3	113	362	1.73913	99.1781	2.13569	0.597703	1	0.158484	0.158484	2	2	1	0.5	1
UniRef100_A0A9Q7Y1P3	7	29	108	336	93.913	7.94521	0.750958	0.684723	1	0.158684	0.158684	10	4	6	0.753906	0.753906
UniRef100_A0A0H2XFI6	7	19	108	346	6.08696	94.7945	1.18031	0.813122	1	0.158684	0.158684	3	1	2	1	1
UniRef100_C8CH22	11	39	104	326	90.4348	10.6849	0.884122	0.861473	1	0.158684	0.158684	22	9	18	0.00434351	0.523467
UniRef100_A0A0E0VRW6	3	26	112	339	97.3913	7.12329	0.349245	0.113131	1	0.158784	0.158784	2	1	2	0.5	1
UniRef100_A0A9Q3MSU3	9	33	106	332	92.1739	9.0411	0.854202	0.85013	1	0.158984	0.158984	6	3	4	0.6875	1
UniRef100_A0A0U1MGM3	3	3	112	362	2.6087	99.1781	3.23214	0.152027	1	0.159284	0.159284	6	3	3	1	1
UniRef100_A0A0U1MY76	15	57	100	308	86.9565	15.6164	0.810526	0.552091	1	0.159284	0.159284	9	8	5	0.0390625	1
UniRef100_A0A659I534	5	12	110	353	4.34783	96.7123	1.33712	0.569406	1	0.159284	0.159284	5	4	3	0.375	1
UniRef100_A0A391E2C4	12	33	103	332	10.4348	90.9589	1.17211	0.713709	1	0.159384	0.159384	3	1	3	0.25	1
UniRef100_P64355	12	33	103	332	10.4348	90.9589	1.17211	0.713709	1	0.159384	0.159384	3	1	3	0.25	1
UniRef100_Q6GIC0	12	34	103	331	10.4348	90.6849	1.13421	0.718067	1	0.159384	0.159384	3	2	3	0.25	1
UniRef100_W8TU69	79	243	36	122	68.6957	33.4247	1.10174	0.733281	1	0.159484	0.159484	13	12	5	0.00341797	0.581055
UniRef100_W8UWJ4	99	301	16	64	86.087	17.5342	1.31561	0.39324	1	0.159584	0.159584	10	10	2	0.00195312	0.109375
UniRef100_UPI0005E6257F	3	8	112	357	2.6087	97.8082	1.19531	0.729662	1	0.159784	0.159784	7	3	6	0.125	1
UniRef100_A0A2I6PCS6	3	3	112	362	2.6087	99.1781	3.23214	0.152027	1	0.159884	0.159884	6	3	3	1	1
UniRef100_A0A179EAV6	24	71	91	294	20.8696	80.5479	1.09209	0.788519	1	0.159884	0.159884	27	15	15	0.701108	0.701108
UniRef100_A0A0U1MK54	15	54	100	311	86.9565	14.7945	0.863889	0.760761	1	0.159984	0.159984	7	6	2	0.125	0.453125
UniRef100_A0A9P1SDI2	2	14	113	351	98.2609	3.83562	0.443742	0.379191	1	0.160084	0.160084	8	2	7	0.0703125	0.289062
UniRef100_UPI0007CA27F8	11	30	104	335	9.56522	91.7808	1.18109	0.702134	1	0.160084	0.160084	9	8	2	0.0390625	0.179688
UniRef100_A0A391DK99	15	31	100	334	13.0435	91.5068	1.61613	0.149899	1	0.160284	0.160284	3	3	1	0.25	1
UniRef100_A0A0H3K9E8	3	12	112	353	97.3913	3.28767	0.787946	1	1	0.160284	0.160284	13	2	12	0.00341797	0.0224609
UniRef100_P95709	36	105	79	260	31.3043	71.2329	1.12839	0.639056	1	0.160384	0.160384	11	10	4	0.0117188	0.548828
UniRef100_I2FJF5	2	8	113	357	98.2609	2.19178	0.789823	1	1	0.160384	0.160384	8	2	7	0.0703125	0.289062
UniRef100_I2FJF4	2	8	113	357	98.2609	2.19178	0.789823	1	1	0.160384	0.160384	8	2	7	0.0703125	0.289062
UniRef100_A0A9Q4QNA3	17	43	98	322	14.7826	88.2192	1.299	0.419603	1	0.160584	0.160584	3	1	3	0.25	1
UniRef100_A0A8G2I409	2	3	113	362	1.73913	99.1781	2.13569	0.597703	1	0.160584	0.160584	2	2	1	0.5	1
UniRef100_Q2FUW3	31	70	84	295	26.9565	80.8219	1.55527	0.0878212	1	0.160784	0.160784	11	9	6	0.0654297	1
UniRef100_A0A9N8FBX7	7	33	108	332	93.913	9.0411	0.652076	0.438581	1	0.160784	0.160784	8	3	6	0.289062	0.726562
UniRef100_A0A0D1HSG4	32	98	83	267	27.8261	73.1507	1.05041	0.904266	1	0.160784	0.160784	11	5	10	0.0117188	1
UniRef100_A0A7I8NMW2	3	26	112	339	97.3913	7.12329	0.349245	0.113131	1	0.161084	0.161084	2	1	2	0.5	1
UniRef100_Q6G6Z0	5	16	110	349	95.6522	4.38356	0.991477	1	1	0.161084	0.161084	7	5	5	0.453125	0.453125
UniRef100_A0A7Z7R086	13	30	102	335	11.3043	91.7808	1.4232	0.348904	1	0.161184	0.161184	7	7	2	0.015625	0.453125
UniRef100_P63518	13	26	102	339	11.3043	92.8767	1.66176	0.170775	1	0.161284	0.161284	5	5	1	0.0625	0.375
UniRef100_A0A075LYD8	7	28	108	337	93.913	7.67123	0.780093	0.683334	1	0.161484	0.161484	13	5	11	0.0224609	0.581055
UniRef100_A0A9N8IHF3	15	39	100	326	13.0435	89.3151	1.25385	0.499854	1	0.161684	0.161684	6	3	5	0.21875	1
UniRef100_A0A2W2QEH2	37	94	78	271	32.1739	74.2466	1.36757	0.187803	1	0.161784	0.161784	11	10	6	0.0117188	1
UniRef100_A0A6G4IW23	2	3	113	362	1.73913	99.1781	2.13569	0.597703	1	0.162084	0.162084	2	2	1	0.5	1
UniRef100_A0A6G4IRA2	2	3	113	362	1.73913	99.1781	2.13569	0.597703	1	0.162084	0.162084	2	2	1	0.5	1
UniRef100_X5DZI9	13	30	102	335	11.3043	91.7808	1.4232	0.348904	1	0.162184	0.162184	10	4	8	0.109375	0.753906
UniRef100_A0A133PYG5	5	25	110	340	95.6522	6.84932	0.618182	0.386375	1	0.162184	0.162184	6	4	5	0.21875	0.6875
UniRef100_A0A0E1VRL0	24	87	91	278	79.1304	23.8356	0.842743	0.612034	1	0.162184	0.162184	6	4	5	0.21875	0.6875
UniRef100_Q6GE44	13	30	102	335	11.3043	91.7808	1.4232	0.348904	1	0.162384	0.162384	6	6	2	0.03125	0.6875
UniRef100_A0A0U1MGZ9	13	56	102	309	88.6957	15.3425	0.703256	0.360269	1	0.162484	0.162484	2	1	2	0.5	1
UniRef100_A0A9N8NRV1	13	39	102	326	11.3043	89.3151	1.06536	0.863911	1	0.162684	0.162684	4	2	4	0.125	1
UniRef100_UPI000D74ED1E	10	14	105	351	8.69565	96.1644	2.38776	0.0484674	1	0.162784	0.162784	4	4	2	0.125	1
UniRef100_T1Y6B6	38	88	77	277	33.0435	75.8904	1.55342	0.0681222	1	0.162884	0.162884	7	5	7	0.015625	0.453125
UniRef100_A0A391DGC2	11	30	104	335	9.56522	91.7808	1.18109	0.702134	1	0.162984	0.162984	3	1	3	0.25	1
UniRef100_A0A6H3QFN0	1	9	114	356	99.1304	2.46575	0.346979	0.4637	1	0.163484	0.163484	7	1	7	0.015625	0.125
UniRef100_A0A2C9TRD9	4	4	111	361	3.47826	98.9041	3.25225	0.0981084	1	0.163584	0.163584	4	3	3	0.625	0.625
UniRef100_A0A659I9G4	3	9	112	356	2.6087	97.5342	1.05952	1	1	0.163584	0.163584	10	2	9	0.0214844	0.109375
UniRef100_UPI00069C2910	6	8	109	357	5.21739	97.8082	2.45642	0.111379	1	0.163684	0.163684	3	3	1	0.25	1
UniRef100_A0A9Q4V1A3	3	4	112	361	2.6087	98.9041	2.41741	0.366061	1	0.163684	0.163684	4	3	2	0.625	1
UniRef100_Q6GFN8	11	34	104	331	9.56522	90.6849	1.02969	1	1	0.163684	0.163684	6	3	4	0.6875	1
UniRef100_Q6GCR5	42	105	73	260	36.5217	71.2329	1.42466	0.131579	1	0.163984	0.163984	10	9	5	0.0214844	1
UniRef100_A6U2R6	0	7	115	358	100	1.91781	0	0.204938	1	0.164084	0.164084	7	0	7	0.015625	0.015625
UniRef100_A0A7Z8DA01	7	9	108	356	6.08696	97.5342	2.56379	0.0734777	1	0.164284	0.164284	3	3	2	0.25	1
UniRef100_A0A9Q4UXK5	5	7	110	358	4.34783	98.0822	2.32468	0.169888	1	0.164284	0.164284	6	4	4	0.6875	0.6875
UniRef100_A0A9Q3R6N9	9	28	106	337	7.82609	92.3288	1.0219	1	1	0.164284	0.164284	6	2	4	0.6875	0.6875
UniRef100_A0A0E3TAJ7	5	17	110	348	95.6522	4.65753	0.930481	1	1	0.164284	0.164284	17	4	15	0.00234985	0.0490417
UniRef100_A0A9Q4QP32	17	43	98	322	14.7826	88.2192	1.299	0.419603	1	0.164384	0.164384	3	1	3	0.25	1
UniRef100_A0A9Q7XYQ4	10	35	105	330	91.3043	9.58904	0.897959	0.856189	1	0.164384	0.164384	4	2	3	0.625	1
UniRef100_A7X1D8	41	115	74	250	35.6522	68.4932	1.20447	0.425358	1	0.164584	0.164584	14	12	8	0.0129395	0.790527
UniRef100_S4V6E8	3	20	112	345	97.3913	5.47945	0.462054	0.315596	1	0.164784	0.164784	21	3	18	0.00148964	0.00148964
UniRef100_A0A6B1RQP7	7	20	108	345	6.08696	94.5205	1.11806	0.817415	1	0.164784	0.164784	4	1	4	0.125	0.625
UniRef100_A0A641A7B0	8	13	107	352	6.95652	96.4384	2.02444	0.123811	1	0.164984	0.164984	3	3	3	0.25	0.25
UniRef100_A0A5C8X3V8	6	6	109	359	5.21739	98.3562	3.29358	0.0428883	1	0.165183	0.165183	3	3	1	0.25	1
UniRef100_Q6G8N2	23	55	92	310	20	84.9315	1.40909	0.245756	1	0.165183	0.165183	9	4	7	0.179688	1
UniRef100_A0A9Q4YMD4	6	10	109	355	5.21739	97.2603	1.95413	0.231569	1	0.165283	0.165283	3	3	2	0.25	1
UniRef100_A0A9Q4UX23	6	10	109	355	5.21739	97.2603	1.95413	0.231569	1	0.165283	0.165283	3	3	2	0.25	1
UniRef100_A0A0E8IZU7	6	13	109	352	5.21739	96.4384	1.49047	0.417398	1	0.165583	0.165583	4	1	3	0.625	0.625
UniRef100_A0A9N8NRP1	13	29	102	336	11.3043	92.0548	1.47667	0.261207	1	0.165983	0.165983	12	9	6	0.145996	1
UniRef100_A0A0D6GGQ7	13	36	102	329	11.3043	90.137	1.16476	0.723878	1	0.165983	0.165983	8	4	8	0.0078125	1
UniRef100_A0A0D1IBJ1	84	253	31	112	73.0435	30.6849	1.19954	0.484333	1	0.166083	0.166083	22	20	8	0.000121117	0.286279
UniRef100_A0A9Q4Y5X2	3	16	112	349	97.3913	4.38356	0.584263	0.584124	1	0.166083	0.166083	11	3	9	0.0654297	0.226562
UniRef100_A0A2U0INV6	13	28	102	337	11.3043	92.3288	1.53396	0.25082	1	0.166183	0.166183	4	4	1	0.125	0.625
UniRef100_A0A0E1XBT2	12	30	103	335	10.4348	91.7808	1.30097	0.453217	1	0.166383	0.166383	6	6	3	0.03125	1
UniRef100_A0A8D9SP41	13	30	102	335	11.3043	91.7808	1.4232	0.348904	1	0.166683	0.166683	9	8	2	0.0390625	0.179688
UniRef100_UPI0002432701	3	5	112	360	2.6087	98.6301	1.92857	0.404594	1	0.166983	0.166983	4	3	3	0.625	0.625
UniRef100_P0A047	6	18	109	347	5.21739	95.0685	1.06116	1	1	0.167083	0.167083	14	4	13	0.00183105	0.179565
UniRef100_A0A7U7EZE9	11	30	104	335	9.56522	91.7808	1.18109	0.702134	1	0.167283	0.167283	5	3	4	0.375	1
UniRef100_A0A6B5BXB1	19	53	96	312	16.5217	85.4795	1.16509	0.653326	1	0.167483	0.167483	4	4	3	0.125	0.625
UniRef100_Q2FEF1	60	156	55	209	52.1739	57.2603	1.46154	0.085683	1	0.167683	0.167683	15	14	7	0.000976562	1
UniRef100_UPI00044F4F93	6	8	109	357	5.21739	97.8082	2.45642	0.111379	1	0.167983	0.167983	5	4	2	0.375	1
UniRef100_Q7A484	15	30	100	335	13.0435	91.7808	1.675	0.141607	1	0.168083	0.168083	5	5	2	0.0625	1
UniRef100_Q309Y8	17	58	98	307	85.2174	15.8904	0.918191	0.883167	1	0.168183	0.168183	19	14	8	0.0635681	0.647606
UniRef100_A0A0E0VSQ0	3	26	112	339	97.3913	7.12329	0.349245	0.113131	1	0.168383	0.168383	2	1	2	0.5	1
UniRef100_A0A9N8FDI7	7	36	108	329	93.913	9.86301	0.592335	0.263403	1	0.168383	0.168383	13	6	8	0.581055	1
UniRef100_A0A9N8IKS3	11	29	104	336	9.56522	92.0548	1.22546	0.565608	1	0.168483	0.168483	4	2	3	0.625	1
UniRef100_UPI00021AD5C3	8	41	107	324	93.0435	11.2329	0.590837	0.218802	1	0.168683	0.168683	8	7	3	0.0703125	0.726562
UniRef100_R9QSV3	6	10	109	355	5.21739	97.2603	1.95413	0.231569	1	0.168683	0.168683	6	4	4	0.6875	0.6875
UniRef100_C4B833	11	23	104	342	9.56522	93.6986	1.57274	0.295661	1	0.168683	0.168683	8	7	3	0.0703125	0.726562
UniRef100_A0A0D3Q462	7	19	108	346	6.08696	94.7945	1.18031	0.813122	1	0.168683	0.168683	3	1	2	1	1
UniRef100_A0A7H9C6G3	11	39	104	326	90.4348	10.6849	0.884122	0.861473	1	0.168683	0.168683	7	5	7	0.015625	0.453125
UniRef100_Q9ZAH8	35	108	80	257	30.4348	70.411	1.04109	0.907026	1	0.168783	0.168783	14	9	10	0.179565	0.42395
UniRef100_A0A0U1MX59	14	60	101	305	87.8261	16.4384	0.70462	0.302611	1	0.168883	0.168883	10	5	7	0.34375	1
UniRef100_A0A0G2LRV5	18	40	97	325	15.6522	89.0411	1.50773	0.190449	1	0.169183	0.169183	23	12	12	1	1
UniRef100_A0A0D1I4B9	18	47	97	318	15.6522	87.1233	1.25554	0.438195	1	0.169183	0.169183	10	7	6	0.34375	0.753906
UniRef100_A7X6Z3	41	119	74	246	35.6522	67.3973	1.14536	0.571368	1	0.169383	0.169383	16	11	12	0.0768127	0.210114
UniRef100_A0A0E0VT41	99	318	16	47	13.913	87.1233	0.914505	0.753438	1	0.169383	0.169383	12	11	3	0.00634766	0.145996
UniRef100_Q99SC3	20	43	95	322	17.3913	88.2192	1.5765	0.152928	1	0.169583	0.169583	8	7	5	0.0703125	0.726562
UniRef100_P63511	13	35	102	330	11.3043	90.411	1.20168	0.594848	1	0.169583	0.169583	5	3	4	0.375	1
UniRef100_X5E3I4	34	119	81	246	70.4348	32.6027	0.867725	0.568113	1	0.169783	0.169783	16	13	9	0.0212708	0.803619
UniRef100_D2JLI5	8	35	107	330	93.0435	9.58904	0.70494	0.457699	1	0.170083	0.170083	13	4	11	0.0224609	0.266846
UniRef100_A0A166Q6R9	20	60	95	305	17.3913	83.5616	1.07018	0.776393	1	0.170183	0.170183	8	8	2	0.0078125	0.289062
UniRef100_A0A0D1HE09	78	242	37	123	67.8261	33.6986	1.07148	0.820897	1	0.170283	0.170283	34	27	14	0.000821395	0.391528
UniRef100_UPI001E4C2F14	1	1	114	364	0.869565	99.726	3.19298	0.422147	1	0.170383	0.170383	1	1	1	1	1
UniRef100_A0A0U1MLK2	14	47	101	318	87.8261	12.8767	0.937855	1	1	0.170383	0.170383	8	7	1	0.0703125	0.0703125
UniRef100_A0A0U1MKK2	11	54	104	311	90.4348	14.7945	0.609152	0.163473	1	0.170583	0.170583	3	2	3	0.25	1
UniRef100_UPI0011C818F9	5	10	110	355	4.34783	97.2603	1.61364	0.368006	1	0.170783	0.170783	5	4	4	0.375	0.375
UniRef100_Q99WT8	14	36	101	329	12.1739	90.137	1.26678	0.485872	1	0.170883	0.170883	4	2	4	0.125	1
UniRef100_A0A0E1X4S2	12	34	103	331	10.4348	90.6849	1.13421	0.718067	1	0.170883	0.170883	3	2	3	0.25	1
UniRef100_A0A659I8Z8	4	13	111	352	96.5217	3.56164	0.975745	1	1	0.171083	0.171083	3	3	2	0.25	1
UniRef100_Q84AN9	26	64	89	301	22.6087	82.4658	1.37395	0.221022	1	0.171283	0.171283	15	9	10	0.301758	0.607239
UniRef100_UPI000386B56D	3	3	112	362	2.6087	99.1781	3.23214	0.152027	1	0.171583	0.171583	2	2	1	0.5	1
UniRef100_A0A9Q4UAR2	6	12	109	353	5.21739	96.7123	1.61927	0.397103	1	0.171583	0.171583	2	1	2	0.5	1
UniRef100_A0A9Q1T6C0	4	9	111	356	3.47826	97.5342	1.42543	0.521608	1	0.171583	0.171583	4	4	3	0.125	0.625
UniRef100_A0A658X575	15	42	100	323	13.0435	88.4932	1.15357	0.624085	1	0.171583	0.171583	3	3	2	0.25	1
UniRef100_UPI00128EB2AF	5	10	110	355	4.34783	97.2603	1.61364	0.368006	1	0.171783	0.171783	5	4	3	0.375	1
UniRef100_A0A5P8FS80	5	11	110	354	4.34783	96.9863	1.46281	0.550803	1	0.171783	0.171783	4	4	3	0.125	0.625
UniRef100_UPI000207C6F0	0	11	115	354	100	3.0137	0	0.0739638	1	0.171883	0.171883	3	0	3	0.25	0.25
UniRef100_A0A9Q7Y703	13	28	102	337	11.3043	92.3288	1.53396	0.25082	1	0.171983	0.171983	9	8	2	0.0390625	0.179688
UniRef100_A7X1D2	113	356	2	9	98.2609	2.46575	1.42837	1	1	0.171983	0.171983	10	9	2	0.0214844	0.109375
UniRef100_W8UWZ2	112	353	3	12	97.3913	3.28767	1.26912	1	1	0.172083	0.172083	8	8	1	0.0078125	0.0703125
UniRef100_A0A659I780	9	18	106	347	7.82609	95.0685	1.63679	0.248975	1	0.172283	0.172283	6	5	4	0.21875	0.6875
UniRef100_A0A641A899	4	12	111	353	3.47826	96.7123	1.06006	1	1	0.172383	0.172383	3	3	3	0.25	0.25
UniRef100_A0A133PUK2	13	26	102	339	11.3043	92.8767	1.66176	0.170775	1	0.172583	0.172583	4	4	2	0.125	1
UniRef100_A0A6D2GYK0	4	23	111	342	96.5217	6.30137	0.53584	0.353585	1	0.172583	0.172583	24	4	20	0.00154388	0.00154388
UniRef100_A0A0E1X9R3	10	26	105	339	8.69565	92.8767	1.24176	0.547995	1	0.172583	0.172583	7	6	4	0.125	1
UniRef100_A0A8D9W2C6	10	31	105	334	8.69565	91.5068	1.02611	1	1	0.172583	0.172583	4	2	3	0.625	1
UniRef100_W8UYI1	57	168	58	197	49.5652	53.9726	1.1524	0.521881	1	0.172683	0.172683	15	13	6	0.00738525	0.607239
UniRef100_A0A7U7EX58	45	134	70	231	39.1304	63.2877	1.10821	0.659212	1	0.172683	0.172683	12	8	9	0.145996	0.387695
UniRef100_A0A9Q4U6H7	7	34	108	331	93.913	9.31507	0.630991	0.341547	1	0.173283	0.173283	9	4	6	0.507812	1
UniRef100_UPI0005B8F790	1	2	114	363	0.869565	99.4521	1.59211	0.56117	1	0.173283	0.173283	1	1	1	1	1
UniRef100_UPI0009100D7B	1	2	114	363	0.869565	99.4521	1.59211	0.56117	1	0.173283	0.173283	1	1	1	1	1
UniRef100_UPI0005BB81A9	1	2	114	363	0.869565	99.4521	1.59211	0.56117	1	0.173283	0.173283	1	1	1	1	1
UniRef100_UPI00085C43C1	1	2	114	363	0.869565	99.4521	1.59211	0.56117	1	0.173283	0.173283	1	1	1	1	1
UniRef100_UPI0005BB3D03	1	2	114	363	0.869565	99.4521	1.59211	0.56117	1	0.173283	0.173283	1	1	1	1	1
UniRef100_A0A0E0VNA8	103	318	12	47	89.5652	12.8767	1.26861	0.625105	1	0.173383	0.173383	8	8	1	0.0078125	0.0703125
UniRef100_A0A0U1MRV3	5	26	110	339	95.6522	7.12329	0.592657	0.385622	1	0.173583	0.173583	12	2	11	0.00634766	0.0385742
UniRef100_Q6GBU8	18	57	97	308	15.6522	84.3836	1.00271	1	1	0.173583	0.173583	6	6	5	0.03125	0.21875
UniRef100_Q2YTE3	8	43	107	322	93.0435	11.7808	0.559878	0.166835	1	0.173683	0.173683	8	5	6	0.289062	0.726562
UniRef100_A0A0Z2RIC6	11	27	104	338	9.56522	92.6027	1.32407	0.433976	1	0.173683	0.173683	8	7	4	0.0703125	1
UniRef100_A0A659I7Y7	15	41	100	324	13.0435	88.7671	1.18537	0.618204	1	0.173883	0.173883	10	5	8	0.109375	1
UniRef100_A0A9Q3R7Z7	12	37	103	328	10.4348	89.863	1.0328	1	1	0.173983	0.173983	4	4	2	0.125	1
UniRef100_A0A0E1X5C4	28	95	87	270	75.6522	26.0274	0.914701	0.80669	1	0.174183	0.174183	11	10	5	0.0117188	1
UniRef100_T1Y511	3	3	112	362	2.6087	99.1781	3.23214	0.152027	1	0.174383	0.174383	2	2	1	0.5	1
UniRef100_T1Y7B7	3	3	112	362	2.6087	99.1781	3.23214	0.152027	1	0.174383	0.174383	2	2	1	0.5	1
UniRef100_T1Y9J3	3	3	112	362	2.6087	99.1781	3.23214	0.152027	1	0.174383	0.174383	2	2	1	0.5	1
UniRef100_A0A391E3Q8	13	25	102	340	11.3043	93.1507	1.73333	0.163436	1	0.174483	0.174483	7	7	1	0.015625	0.125
UniRef100_Q2FV54	41	113	74	252	35.6522	69.0411	1.23559	0.360805	1	0.174483	0.174483	11	10	6	0.0117188	1
UniRef100_L7UL38	1	1	114	364	0.869565	99.726	3.19298	0.422147	1	0.174483	0.174483	1	1	1	1	1
UniRef100_A0A0D1I9N1	3	7	112	358	2.6087	98.0822	1.3699	0.708804	1	0.174583	0.174583	4	3	2	0.625	1
UniRef100_A0A0D6HFT3	7	19	108	346	6.08696	94.7945	1.18031	0.813122	1	0.174583	0.174583	8	4	6	0.289062	1
UniRef100_A0A6K0K0J4	20	73	95	292	82.6087	20	0.842105	0.590205	1	0.174683	0.174683	7	7	5	0.015625	0.453125
UniRef100_T1Y8J8	17	54	98	311	85.2174	14.7945	0.999055	1	1	0.174783	0.174783	8	7	3	0.0703125	0.726562
UniRef100_A0A9Q4QR17	20	54	95	311	17.3913	85.2055	1.21248	0.553646	1	0.174883	0.174883	5	3	4	0.375	1
UniRef100_A0A9N8FDC4	12	55	103	310	89.5652	15.0685	0.656664	0.279516	1	0.175082	0.175082	3	2	3	0.25	1
UniRef100_X5E039	32	104	83	261	72.1739	28.4932	0.967563	1	1	0.175082	0.175082	13	8	12	0.00341797	0.581055
UniRef100_A0A2W3VLG7	47	138	68	227	40.8696	62.1918	1.13694	0.58356	1	0.175182	0.175182	8	8	5	0.0078125	0.726562
UniRef100_A0A7Z7W2Z9	23	53	92	312	20	85.4795	1.4717	0.186914	1	0.175282	0.175282	5	5	5	0.0625	0.0625
UniRef100_A0A2W3JI51	16	39	99	326	13.913	89.3151	1.35095	0.400729	1	0.175282	0.175282	10	7	6	0.34375	0.753906
UniRef100_A0A0Z1CU87	10	25	105	340	8.69565	93.1507	1.29524	0.537894	1	0.175382	0.175382	9	7	5	0.179688	1
UniRef100_A0A6N8ICE8	16	63	99	302	86.087	17.2603	0.774731	0.471627	1	0.175482	0.175482	3	3	2	0.25	1
UniRef100_A0A8G2I163	2	2	113	363	1.73913	99.4521	3.21239	0.243777	1	0.175582	0.175582	2	2	2	0.5	0.5
UniRef100_A0A2X2KYI6	10	27	105	338	8.69565	92.6027	1.19224	0.688812	1	0.175682	0.175682	3	1	3	0.25	1
UniRef100_P0A0L6	37	122	78	243	67.8261	33.4247	0.94483	0.82143	1	0.175882	0.175882	13	12	6	0.00341797	1
UniRef100_Q6G7T7	2	4	113	361	1.73913	98.9041	1.59735	0.633105	1	0.176082	0.176082	2	2	1	0.5	1
UniRef100_A0A7Z7QZX7	14	30	101	335	12.1739	91.7808	1.54785	0.198964	1	0.176182	0.176182	8	8	1	0.0078125	0.0703125
UniRef100_C4B4P6	2	4	113	361	1.73913	98.9041	1.59735	0.633105	1	0.176382	0.176382	2	2	1	0.5	1
UniRef100_UPI000241DA13	2	4	113	361	1.73913	98.9041	1.59735	0.633105	1	0.176382	0.176382	2	2	1	0.5	1
UniRef100_UPI00024C2CB7	2	4	113	361	1.73913	98.9041	1.59735	0.633105	1	0.176382	0.176382	2	2	1	0.5	1
UniRef100_UPI00024C2CB8	2	4	113	361	1.73913	98.9041	1.59735	0.633105	1	0.176382	0.176382	2	2	1	0.5	1
UniRef100_UPI00024C2E75	2	4	113	361	1.73913	98.9041	1.59735	0.633105	1	0.176382	0.176382	2	2	1	0.5	1
UniRef100_UPI00024C343C	2	4	113	361	1.73913	98.9041	1.59735	0.633105	1	0.176382	0.176382	2	2	1	0.5	1
UniRef100_UPI0002B09634	2	4	113	361	1.73913	98.9041	1.59735	0.633105	1	0.176382	0.176382	2	2	1	0.5	1
UniRef100_UPI00024C2FE1	2	4	113	361	1.73913	98.9041	1.59735	0.633105	1	0.176382	0.176382	2	2	1	0.5	1
UniRef100_UPI00024C2F2E	2	4	113	361	1.73913	98.9041	1.59735	0.633105	1	0.176382	0.176382	2	2	1	0.5	1
UniRef100_UPI00024C2F2F	2	4	113	361	1.73913	98.9041	1.59735	0.633105	1	0.176382	0.176382	2	2	1	0.5	1
UniRef100_X5E2B5	34	75	81	290	29.5652	79.4521	1.62305	0.0550898	1	0.176482	0.176482	5	5	4	0.0625	0.375
UniRef100_A0A9Q4V027	6	8	109	357	5.21739	97.8082	2.45642	0.111379	1	0.176482	0.176482	5	5	2	0.0625	1
UniRef100_A0A389NBE8	15	27	100	338	13.0435	92.6027	1.87778	0.0863696	1	0.176582	0.176582	10	8	7	0.109375	0.34375
UniRef100_P95703	0	11	115	354	100	3.0137	0	0.0739638	1	0.176782	0.176782	6	0	6	0.03125	0.03125
UniRef100_UPI00024330BC	3	3	112	362	2.6087	99.1781	3.23214	0.152027	1	0.176782	0.176782	2	2	1	0.5	1
UniRef100_UPI00024334A8	3	3	112	362	2.6087	99.1781	3.23214	0.152027	1	0.176782	0.176782	2	2	1	0.5	1
UniRef100_UPI00024326DD	3	3	112	362	2.6087	99.1781	3.23214	0.152027	1	0.176782	0.176782	2	2	1	0.5	1
UniRef100_Q2FH11	63	175	52	190	54.7826	52.0548	1.31538	0.239388	1	0.176782	0.176782	16	14	8	0.00418091	1
UniRef100_A0A641A6Y7	4	10	111	355	3.47826	97.2603	1.27928	0.750732	1	0.176782	0.176782	4	4	3	0.125	0.625
UniRef100_A0A9P1SB18	30	92	85	273	26.087	74.7945	1.04731	0.902324	1	0.176782	0.176782	7	7	5	0.015625	0.453125
UniRef100_Q99UA1	18	46	97	319	15.6522	87.3973	1.28687	0.431964	1	0.176882	0.176882	5	5	5	0.0625	0.0625
UniRef100_A0A9Q4MEK6	18	51	97	314	15.6522	86.0274	1.14251	0.649404	1	0.176882	0.176882	4	1	4	0.125	0.625
UniRef100_Q5HG20	64	165	51	200	55.6522	54.7945	1.52109	0.0544566	1	0.176982	0.176982	14	13	5	0.00183105	0.42395
UniRef100_T1YA46	61	176	54	189	53.0435	51.7808	1.21307	0.393141	1	0.176982	0.176982	15	13	8	0.00738525	1
UniRef100_A0A131HQT0	14	32	101	333	12.1739	91.2329	1.44245	0.279354	1	0.177282	0.177282	6	6	1	0.03125	0.21875
UniRef100_T1YAQ0	3	3	112	362	2.6087	99.1781	3.23214	0.152027	1	0.177482	0.177482	2	2	1	0.5	1
UniRef100_A0A0E1VWQ9	14	47	101	318	87.8261	12.8767	0.937855	1	1	0.177682	0.177682	7	6	4	0.125	1
UniRef100_D2JD69	1	15	114	350	99.1304	4.10959	0.204678	0.13408	1	0.177982	0.177982	10	1	9	0.0214844	0.0214844
UniRef100_Q2FFR1	30	75	85	290	26.087	79.4521	1.36471	0.244098	1	0.178082	0.178082	8	6	7	0.0703125	0.289062
UniRef100_Q5HH63	18	48	97	317	15.6522	86.8493	1.22552	0.534809	1	0.178482	0.178482	7	4	5	0.453125	1
UniRef100_A0A9N8I5B4	15	46	100	319	13.0435	87.3973	1.04022	0.873604	1	0.178582	0.178582	9	8	1	0.0390625	0.0390625
UniRef100_A0A0E1VIX0	14	47	101	318	87.8261	12.8767	0.937855	1	1	0.178582	0.178582	5	4	2	0.375	1
UniRef100_Q2FZT5	11	41	104	324	90.4348	11.2329	0.835835	0.731611	1	0.178682	0.178682	11	5	8	0.226562	1
UniRef100_Q6GIB9	14	47	101	318	87.8261	12.8767	0.937855	1	1	0.178682	0.178682	9	4	8	0.0390625	1
UniRef100_A0A0U1MMF4	14	52	101	313	87.8261	14.2466	0.834349	0.643419	1	0.178882	0.178882	4	4	2	0.125	1
UniRef100_A0A229LY78	31	125	84	240	73.0435	34.2466	0.708571	0.170732	1	0.179082	0.179082	3	1	3	0.25	1
UniRef100_A0A9Q7Y8X1	9	35	106	330	92.1739	9.58904	0.800539	0.711334	1	0.179082	0.179082	6	3	4	0.6875	1
UniRef100_A0A658BBM4	3	2	112	363	2.6087	99.4521	4.86161	0.0917489	1	0.179282	0.179282	3	3	1	0.25	1
UniRef100_A0A641A4A9	19	46	96	319	16.5217	87.3973	1.37251	0.27813	1	0.179282	0.179282	3	1	3	0.25	1
UniRef100_UPI0001D428BD	2	4	113	361	1.73913	98.9041	1.59735	0.633105	1	0.179282	0.179282	2	2	1	0.5	1
UniRef100_A0A641AA44	2	4	113	361	1.73913	98.9041	1.59735	0.633105	1	0.179282	0.179282	2	2	1	0.5	1
UniRef100_A0A9Q4U7V1	2	12	113	353	98.2609	3.28767	0.520649	0.534466	1	0.179382	0.179382	11	2	10	0.0117188	0.0654297
UniRef100_A0A6N3YXU5	2	4	113	361	1.73913	98.9041	1.59735	0.633105	1	0.179382	0.179382	3	2	2	1	1
UniRef100_A0A641A6V9	2	4	113	361	1.73913	98.9041	1.59735	0.633105	1	0.179382	0.179382	2	2	1	0.5	1
UniRef100_A0A9N8IFV4	2	4	113	361	1.73913	98.9041	1.59735	0.633105	1	0.179382	0.179382	2	2	1	0.5	1
UniRef100_Q6GAA8	2	4	113	361	1.73913	98.9041	1.59735	0.633105	1	0.179382	0.179382	2	2	1	0.5	1
UniRef100_A0A0E1VIH4	12	40	103	325	89.5652	10.9589	0.946602	1	1	0.179382	0.179382	6	5	2	0.21875	0.6875
UniRef100_A0A0H2WXZ3	0	8	115	357	100	2.19178	0	0.207841	1	0.179482	0.179482	7	0	7	0.015625	0.015625
UniRef100_UPI00066B540B	0	8	115	357	100	2.19178	0	0.207841	1	0.179482	0.179482	7	0	7	0.015625	0.015625
UniRef100_A0A0E1VPM3	16	62	99	303	86.087	16.9863	0.789834	0.472365	1	0.179582	0.179582	5	3	5	0.0625	1
UniRef100_X5DVD1	13	34	102	331	11.3043	90.6849	1.24077	0.58925	1	0.179582	0.179582	6	5	4	0.21875	0.6875
UniRef100_A0A0E1VNV4	13	43	102	322	88.6957	11.7808	0.9544	1	1	0.179582	0.179582	7	7	2	0.015625	0.453125
UniRef100_A0A6B5ULN5	39	94	76	271	33.913	74.2466	1.47942	0.0951339	1	0.179682	0.179682	10	10	3	0.00195312	0.34375
UniRef100_UPI0005BC7292	1	2	114	363	0.869565	99.4521	1.59211	0.56117	1	0.179682	0.179682	1	1	1	1	1
UniRef100_UPI0005BDA49C	1	2	114	363	0.869565	99.4521	1.59211	0.56117	1	0.179682	0.179682	1	1	1	1	1
UniRef100_UPI0005B83F06	1	2	114	363	0.869565	99.4521	1.59211	0.56117	1	0.179682	0.179682	1	1	1	1	1
UniRef100_UPI0005B8D404	1	2	114	363	0.869565	99.4521	1.59211	0.56117	1	0.179682	0.179682	1	1	1	1	1
UniRef100_UPI0002C90F31	1	2	114	363	0.869565	99.4521	1.59211	0.56117	1	0.179682	0.179682	1	1	1	1	1
UniRef100_A0A385IRA9	1	2	114	363	0.869565	99.4521	1.59211	0.56117	1	0.179682	0.179682	1	1	1	1	1
UniRef100_UPI0005B89D75	1	2	114	363	0.869565	99.4521	1.59211	0.56117	1	0.179682	0.179682	1	1	1	1	1
UniRef100_UPI00085CA1D5	1	2	114	363	0.869565	99.4521	1.59211	0.56117	1	0.179682	0.179682	1	1	1	1	1
UniRef100_A0A7H3V0K2	1	2	114	363	0.869565	99.4521	1.59211	0.56117	1	0.179682	0.179682	1	1	1	1	1
UniRef100_UPI0005BBE6FE	1	2	114	363	0.869565	99.4521	1.59211	0.56117	1	0.179682	0.179682	1	1	1	1	1
UniRef100_UPI0001C0BDFA	2	2	113	363	1.73913	99.4521	3.21239	0.243777	1	0.179882	0.179882	2	2	2	0.5	0.5
UniRef100_A0A8G2HZE5	2	2	113	363	1.73913	99.4521	3.21239	0.243777	1	0.179882	0.179882	2	2	2	0.5	0.5
UniRef100_UPI0001C33A5D	2	2	113	363	1.73913	99.4521	3.21239	0.243777	1	0.179882	0.179882	2	2	2	0.5	0.5
UniRef100_A0A8G2I0P2	2	2	113	363	1.73913	99.4521	3.21239	0.243777	1	0.179882	0.179882	2	2	2	0.5	0.5
UniRef100_A0A8G2I193	2	2	113	363	1.73913	99.4521	3.21239	0.243777	1	0.179882	0.179882	2	2	2	0.5	0.5
UniRef100_A0A8G2MAQ2	2	2	113	363	1.73913	99.4521	3.21239	0.243777	1	0.179882	0.179882	2	2	2	0.5	0.5
UniRef100_A0A9Q3MRQ1	5	28	110	337	95.6522	7.67123	0.547078	0.291389	1	0.179882	0.179882	4	2	3	0.625	1
UniRef100_A0A0D6G8V3	9	19	106	346	7.82609	94.7945	1.54618	0.35985	1	0.179882	0.179882	2	2	1	0.5	1
UniRef100_A0EWZ4	59	172	56	193	51.3043	52.8767	1.18221	0.455059	1	0.179882	0.179882	55	36	29	0.0300289	0.787706
UniRef100_A0A0Z1AWZ7	15	39	100	326	13.0435	89.3151	1.25385	0.499854	1	0.179882	0.179882	7	6	3	0.125	1
UniRef100_Q6GIB3	13	29	102	336	11.3043	92.0548	1.47667	0.261207	1	0.179982	0.179982	9	8	2	0.0390625	0.179688
UniRef100_R4WAL1	3	9	112	356	2.6087	97.5342	1.05952	1	1	0.179982	0.179982	4	1	4	0.125	0.625
UniRef100_A0A2I7Y8R8	9	14	106	351	7.82609	96.1644	2.12871	0.128881	1	0.180082	0.180082	11	6	6	1	1
UniRef100_A0A0E1X9R8	12	28	103	337	10.4348	92.3288	1.40222	0.338869	1	0.180182	0.180182	7	6	5	0.125	0.453125
UniRef100_R9QST9	3	15	112	350	97.3913	4.10959	0.625	0.582432	1	0.180182	0.180182	7	2	7	0.015625	0.453125
UniRef100_A0A0U1MHM5	82	257	33	108	71.3043	29.589	1.04422	0.906857	1	0.180182	0.180182	18	16	6	0.00131226	0.237885
UniRef100_A0A9Q4YIF3	5	5	110	360	4.34783	98.6301	3.27273	0.0645055	1	0.180282	0.180282	3	3	1	0.25	1
UniRef100_Q93CC7	3	5	112	360	2.6087	98.6301	1.92857	0.404594	1	0.180282	0.180282	4	3	2	0.625	1
UniRef100_A0A0U1MJQ1	14	66	101	299	87.8261	18.0822	0.627963	0.153058	1	0.180582	0.180582	4	2	4	0.125	1
UniRef100_A0A133PVD0	7	18	108	347	6.08696	95.0685	1.24949	0.632579	1	0.180582	0.180582	3	1	2	1	1
UniRef100_A0A9Q4U6I6	12	53	103	312	89.5652	14.5205	0.68584	0.347998	1	0.180682	0.180682	3	2	3	0.25	1
UniRef100_UPI0002CC3063	2	4	113	361	1.73913	98.9041	1.59735	0.633105	1	0.180782	0.180782	2	2	1	0.5	1
UniRef100_A0A9Q7Y9G8	11	41	104	324	90.4348	11.2329	0.835835	0.731611	1	0.180782	0.180782	3	1	3	0.25	1
UniRef100_A0A0H3K7V0	7	22	108	343	6.08696	93.9726	1.01052	1	1	0.180782	0.180782	3	1	3	0.25	1
UniRef100_A0A0U1MSV0	13	55	102	310	88.6957	15.0685	0.71836	0.359755	1	0.180882	0.180882	2	1	2	0.5	1
UniRef100_Q6GDD6	10	31	105	334	8.69565	91.5068	1.02611	1	1	0.180882	0.180882	4	2	3	0.625	1
UniRef100_UPI0002507272	2	4	113	361	1.73913	98.9041	1.59735	0.633105	1	0.181082	0.181082	2	2	1	0.5	1
UniRef100_A0A6B5HZM4	2	2	113	363	1.73913	99.4521	3.21239	0.243777	1	0.181382	0.181382	2	2	2	0.5	0.5
UniRef100_A0A0D6GG52	5	18	110	347	95.6522	4.93151	0.876263	1	1	0.181382	0.181382	4	2	3	0.625	1
UniRef100_A0A2S6D5A0	12	43	103	322	89.5652	11.7808	0.872432	0.86669	1	0.181482	0.181482	4	2	4	0.125	1
UniRef100_A0A9Q3MNN6	30	76	85	289	26.087	79.1781	1.34211	0.24718	1	0.181682	0.181682	7	7	3	0.015625	1
UniRef100_Q6GDM0	14	31	101	334	12.1739	91.5068	1.49345	0.270483	1	0.181782	0.181782	7	7	1	0.015625	0.125
UniRef100_T1YDM7	17	52	98	313	14.7826	85.7534	1.04415	0.879543	1	0.181782	0.181782	3	3	1	0.25	1
UniRef100_UPI00021AE8CC	2	4	113	361	1.73913	98.9041	1.59735	0.633105	1	0.181882	0.181882	2	2	1	0.5	1
UniRef100_A0A9Q4UZL2	5	14	110	351	4.34783	96.1644	1.13961	0.78659	1	0.181882	0.181882	5	2	4	0.375	1
UniRef100_Q0H0H0	47	122	68	243	40.8696	66.5753	1.37669	0.147505	1	0.181982	0.181982	11	10	6	0.0117188	1
UniRef100_A0A0E1X9M9	11	31	104	334	9.56522	91.5068	1.13958	0.707459	1	0.181982	0.181982	5	3	4	0.375	1
UniRef100_A0A166N9L6	13	38	102	327	11.3043	89.589	1.09675	0.862241	1	0.181982	0.181982	3	1	3	0.25	1
UniRef100_Q2FDT8	40	101	75	264	34.7826	72.3288	1.39406	0.159269	1	0.182182	0.182182	12	11	5	0.00634766	0.774414
UniRef100_A0A0E0VNH4	3	25	112	340	97.3913	6.84932	0.364286	0.110873	1	0.182282	0.182282	3	1	3	0.25	1
UniRef100_A0A0Z0XGB4	11	23	104	342	9.56522	93.6986	1.57274	0.295661	1	0.182282	0.182282	10	8	4	0.109375	0.753906
UniRef100_UPI0005BCC78F	1	2	114	363	0.869565	99.4521	1.59211	0.56117	1	0.182282	0.182282	1	1	1	1	1
UniRef100_UPI0005BE0E56	1	2	114	363	0.869565	99.4521	1.59211	0.56117	1	0.182282	0.182282	1	1	1	1	1
UniRef100_UPI0005BE4510	1	2	114	363	0.869565	99.4521	1.59211	0.56117	1	0.182282	0.182282	1	1	1	1	1
UniRef100_A0A385IRQ1	1	2	114	363	0.869565	99.4521	1.59211	0.56117	1	0.182282	0.182282	1	1	1	1	1
UniRef100_A0A385ISJ8	1	2	114	363	0.869565	99.4521	1.59211	0.56117	1	0.182282	0.182282	1	1	1	1	1
UniRef100_A0A2S6DGH9	16	71	99	294	86.087	19.4521	0.669227	0.211962	1	0.182382	0.182382	7	4	6	0.125	1
UniRef100_Q6GH55	12	35	103	330	10.4348	90.411	1.09847	0.857229	1	0.182382	0.182382	4	2	3	0.625	1
UniRef100_A0A090N254	58	197	57	168	49.5652	53.9726	0.867753	0.521881	1	0.182482	0.182482	23	17	12	0.0346897	1
UniRef100_A0A0E1XJI8	0	6	115	359	100	1.64384	0	0.343451	1	0.182582	0.182582	6	0	6	0.03125	0.03125
UniRef100_A0A2W3WBR7	39	132	76	233	66.087	36.1644	0.905801	0.73782	1	0.182682	0.182682	9	6	7	0.179688	0.507812
UniRef100_A0A0D6HBZ8	6	19	109	346	5.21739	94.7945	1.00241	1	1	0.182882	0.182882	2	1	2	0.5	1
UniRef100_A0A0K2D1T2	34	79	81	286	29.5652	78.3562	1.51961	0.100779	1	0.183082	0.183082	13	11	8	0.0224609	0.581055
UniRef100_UPI000207C5C7	3	16	112	349	97.3913	4.38356	0.584263	0.584124	1	0.183082	0.183082	3	3	3	0.25	0.25
UniRef100_A0A9N8FBX9	11	53	104	312	90.4348	14.5205	0.622642	0.20878	1	0.183382	0.183382	6	3	4	0.6875	1
UniRef100_A0A390B7Z0	22	73	93	292	80.8696	20	0.946237	0.893869	1	0.183482	0.183482	6	4	6	0.03125	0.6875
UniRef100_Q5HJX8	21	83	94	282	81.7391	22.7397	0.759036	0.364013	1	0.183582	0.183582	7	4	6	0.125	1
UniRef100_A0A9Q7YBN5	6	19	109	346	5.21739	94.7945	1.00241	1	1	0.183582	0.183582	5	4	2	0.375	1
UniRef100_A0A1M3SJR5	16	31	99	334	13.913	91.5068	1.74128	0.104699	1	0.183782	0.183782	7	6	6	0.125	0.125
UniRef100_A0A0D3QAE7	9	30	106	335	92.1739	8.21918	0.948113	1	1	0.183782	0.183782	5	3	4	0.375	1
UniRef100_T1Y7T9	15	50	100	315	86.9565	13.6986	0.945	1	1	0.183882	0.183882	3	3	3	0.25	0.25
UniRef100_A0A9N8FAK3	8	36	107	329	93.0435	9.86301	0.683281	0.458546	1	0.183982	0.183982	6	3	5	0.21875	1
UniRef100_T1YD10	18	55	97	310	15.6522	84.9315	1.04592	0.882143	1	0.183982	0.183982	8	7	5	0.0703125	0.726562
UniRef100_UPI000C1DE38F	3	2	112	363	2.6087	99.4521	4.86161	0.0917489	1	0.184182	0.184182	2	2	1	0.5	1
[truncated: 45,584 more rows]
