# Supplementary material
Source: Research Square preprint supplement (doi:10.21203/rs.3.rs-9449451/v1)
Supplement: Supplementary file 6 [file dc2a80aa094c825cb148f3cf.xlsx]

## Sheet: sortiert_incr_decre_&_phylogeny
order phylogeny		sample	MLST type (Clonal Complex)	survival state	MRSA status	UniRef100_A0A4U2KP01	UniRef100_D2J5W1	UniRef100_A0A6C0L8I7	UniRef100_A0A658X0A3	UniRef100_D2J5X3	UniRef100_D2J5X0	UniRef100_D2J5W0/D2J5W8/D2J5Y9/D2J5Z4/O85217/Q8VVU3	UniRef100_D2J5X2	UniRef100_B2ZYZ2	UniRef100_A0A9Q4UZ40	UniRef100_A0A9Q4V4N4	UniRef100_UPI0002CA386D	UniRef100_C4TFC1	UniRef100_A0A2R4A9A6	UniRef100_A7X1P3	UniRef100_A0A7U7EV04	UniRef100_O80068	UniRef100_T1Y821	UniRef100_A0A9P1QL98	UniRef100_E4PYM0	UniRef100_B6V395	UniRef100_A7X388	UniRef100_P68799	UniRef100_A6U0P1	UniRef100_A0A3M7WI19	UniRef100_A0A0D1JN68	UniRef100_V5YRT8	UniRef100_A0A2X3WAT2	UniRef100_Q2G0K7	UniRef100_A0A0D6GEK5	UniRef100_W8TRM3	UniRef100_Q2FIJ2	UniRef100_X5EHN8	UniRef100_W8U2Z7	UniRef100_Q99SA3	UniRef100_W8UXA3	UniRef100_W8TRN2	UniRef100_W8TTH4	UniRef100_Q93PN3	UniRef100_A0A9Q8H2H2	UniRef100_A7X1H4	UniRef100_A6U4X7	UniRef100_W8U5T5	UniRef100_Q99RL9
1	#VALUE!	H2-17-0159-1	72	survived	no MRSA	0	0	0	0	0	0	0	0	0	0	0	0	1	0	1	0	0	1	1	0	1	1	0	0	0	0	1	0	0	0	0	1	1	1	0	0	0	0	0	1	0	1	0	1
2		H5-19-0368-1	72	survived	MRSA	0	0	0	0	0	0	0	0	0	0	0	0	0	0	1	0	0	1	1	0	0	1	0	0	0	0	1	0	0	0	0	1	1	1	1	0	0	1	1	1	0	1	1	1
3		H2-20-0257-1	72	died	no MRSA	0	0	0	0	0	0	0	0	0	0	0	0	0	0	1	0	0	1	1	0	0	1	0	0	0	0	1	0	0	0	0	1	1	1	1	0	0	1	1	1	0	1	1	1
4		H5-17-0214-1	72	died	no MRSA	0	0	0	0	0	0	0	0	0	0	0	0	1	0	1	0	0	1	1	0	1	1	0	0	0	0	1	0	0	0	0	1	1	1	1	0	0	1	1	1	0	1	1	1
5		H4-18-0333-1	72	survived	no MRSA	0	0	0	0	0	0	0	0	0	0	0	0	0	0	1	0	0	1	1	1	0	1	0	0	0	0	1	0	0	0	0	1	1	1	1	0	0	1	1	1	0	1	1	1
6		H5-18-0148-1	12	survived	no MRSA	0	0	0	0	0	0	0	0	0	0	0	0	0	0	0	0	0	0	0	0	0	0	0	0	0	1	0	0	1	0	0	1	0	0	0	0	0	0	0	0	0	0	1	1
7		H5-20-0217-1	12	survived	no MRSA	0	0	0	0	0	0	0	0	0	0	0	0	0	1	0	0	0	0	0	1	0	0	0	0	0	1	0	0	1	0	0	1	0	1	0	0	0	0	0	0	0	0	1	1
8		H2-18-0222-1	-	survived	no MRSA	0	0	0	0	0	0	0	0	0	0	0	0	0	0	0	0	0	0	0	0	0	0	0	0	0	1	0	0	1	0	0	1	0	1	0	0	0	0	0	0	0	0	1	1
9		H2-20-0671-1	4022	survived	no MRSA	0	0	0	1	0	0	0	0	0	0	0	0	0	1	0	1	1	0	0	1	0	0	0	0	0	1	0	0	1	0	0	1	0	1	0	0	0	0	0	0	0	0	0	1
10		H2-17-0658-1	12	survived	no MRSA	0	0	0	0	0	0	0	0	0	0	0	0	0	0	0	0	0	0	0	0	0	0	0	0	0	1	0	0	1	0	0	1	0	1	0	0	0	0	0	0	0	0	0	1
11		H5-18-0299-1	-	survived	no MRSA	0	0	0	0	0	0	0	0	0	0	0	0	0	1	0	0	0	0	0	1	0	0	0	0	0	1	0	0	1	0	0	0	0	1	0	0	0	0	0	0	0	0	0	1
12		H3-17-0179-1	12	survived	no MRSA	0	0	0	0	0	0	0	0	0	0	0	0	0	0	0	0	0	0	0	0	0	0	0	0	0	1	0	0	0	0	0	0	0	1	0	0	0	0	0	0	0	0	0	0
13		H4-18-0426-1	12	survived	no MRSA	0	0	0	0	0	0	0	0	0	0	0	0	0	0	0	0	0	0	0	0	0	0	0	0	0	1	0	0	0	0	0	0	0	1	0	0	0	0	0	0	0	0	0	1
14		H2-18-0026-1	12	survived	no MRSA	0	0	0	0	0	0	0	0	0	0	0	0	1	1	0	0	0	0	0	1	1	0	0	0	0	1	0	0	1	0	0	0	0	1	0	0	0	0	0	0	0	0	0	1
15		H5-19-0320-1	5732	survived	no MRSA	0	0	0	0	0	0	0	0	0	0	0	0	0	0	0	0	0	1	1	0	0	0	0	0	1	1	1	0	1	1	1	1	1	1	1	1	1	0	1	1	1	0	1	1
16		H4-18-0298-1	6	died	no MRSA	0	0	0	0	0	0	0	0	0	0	0	0	0	0	0	0	0	1	0	0	0	0	0	0	1	1	1	0	1	1	1	1	1	1	1	1	1	1	1	1	1	0	1	1
17		H1-17-0647-1	6	survived	no MRSA	0	1	0	0	1	1	1	1	0	0	0	0	0	1	0	0	0	1	1	1	0	0	0	0	1	1	1	0	1	1	1	1	1	1	1	1	1	1	1	1	1	0	1	1
18		H2-18-0104-1	6	survived	no MRSA	0	0	0	0	0	0	0	0	0	0	0	0	0	0	0	0	0	1	1	0	0	0	0	0	1	1	1	0	1	1	1	1	1	1	1	1	1	1	1	1	1	0	0	1
19		H5-18-0309-1	6	died	no MRSA	0	0	0	0	0	0	0	0	0	0	0	0	0	0	0	0	0	1	1	0	0	0	0	0	1	1	1	0	1	1	1	1	1	1	1	1	1	1	1	1	1	0	1	1
20		H2-20-0612-1	6	survived	no MRSA	0	0	0	0	0	0	0	0	0	0	0	0	0	0	0	0	0	1	1	0	0	0	0	0	1	1	1	0	1	1	1	1	1	1	1	1	1	1	1	1	1	0	0	1
21		H2-17-0619-1	6	survived	no MRSA	0	0	0	0	0	0	0	0	0	0	0	0	0	0	0	0	0	1	1	0	0	0	0	0	1	1	1	0	0	1	1	1	1	1	0	1	1	1	1	1	1	0	1	1
22		H2-17-0175-1	6	survived	no MRSA	0	0	0	0	0	0	0	0	0	0	0	0	0	0	0	0	0	0	1	0	0	0	0	0	1	1	1	0	1	1	1	1	1	1	1	1	1	1	1	1	1	0	1	1
23		H2-18-0020-1	6	survived	no MRSA	0	0	0	0	0	0	0	0	0	0	0	0	0	0	0	0	0	1	1	0	0	0	0	0	1	1	1	0	1	1	1	1	1	1	1	1	1	1	1	1	1	0	1	1
24		H2-17-0223-1	6	survived	no MRSA	0	0	0	0	0	0	0	0	0	0	0	0	0	0	0	0	0	1	1	0	0	0	0	0	1	1	1	0	1	1	1	1	1	1	1	1	1	1	1	1	1	0	1	1
25		H1-18-0328-1	789	survived	no MRSA	0	0	0	0	0	0	0	0	0	0	0	0	0	0	0	0	0	0	0	0	0	0	0	0	0	0	0	0	0	0	0	0	0	0	1	0	0	1	0	1	1	0	1	0
26		H2-18-0600-1	7	died	no MRSA	0	0	0	0	0	0	0	0	0	0	0	0	0	0	0	0	0	0	0	0	0	0	0	0	0	0	0	0	0	0	0	0	0	0	1	1	0	1	1	1	1	0	1	0
27		H4-17-0351-1	7	survived	no MRSA	0	0	0	0	0	0	0	0	0	0	0	0	0	0	0	0	0	0	0	0	0	0	0	0	0	0	0	0	0	0	0	0	0	0	1	1	0	1	1	1	1	0	1	0
28		H1-18-0343-1	7	survived	no MRSA	0	0	0	0	0	0	0	0	1	0	0	0	0	0	0	0	0	0	0	0	0	0	0	0	0	0	0	0	0	0	0	0	0	0	1	1	0	1	1	1	1	0	1	0
29		H2-20-0654-1	7	died	no MRSA	0	0	0	0	0	0	0	0	0	0	0	0	0	0	0	0	0	0	0	0	0	0	0	0	0	0	0	0	0	0	0	0	0	0	1	1	0	1	1	1	1	0	1	0
30		H5-18-0276-1	7	survived	no MRSA	0	0	0	0	0	0	0	0	0	0	0	0	0	0	0	0	0	0	0	0	0	0	0	0	0	0	0	0	0	0	0	0	0	0	1	0	0	1	1	1	1	0	0	0
31		H5-17-0105-1	7	survived	no MRSA	0	0	0	0	0	0	0	0	0	0	0	0	0	0	0	0	0	0	0	0	0	0	0	0	0	0	0	0	0	0	0	0	0	0	1	1	0	0	1	1	1	0	1	0
32		H3-17-0211-1	7	survived	no MRSA	0	0	0	0	0	0	0	0	0	0	0	0	0	0	0	0	0	0	0	0	0	0	0	0	0	0	0	0	0	0	0	0	0	0	1	1	0	1	1	1	1	0	1	0
33		H4-17-0239-1	7	died	no MRSA	0	0	0	0	0	0	0	0	0	0	0	0	0	0	0	0	0	0	0	0	0	0	0	0	0	0	0	0	0	0	0	0	0	0	1	1	0	1	1	1	1	0	1	0
34		H3-17-0222-1	7	survived	no MRSA	0	0	0	0	0	0	0	0	0	0	0	0	0	0	0	0	0	0	0	0	0	0	0	0	0	0	0	0	0	0	0	0	0	0	1	1	0	1	1	1	1	0	1	0
35		H1-17-0272-1	7	survived	no MRSA	0	0	0	0	0	0	0	0	0	0	0	0	0	0	0	0	0	0	0	0	0	0	0	0	0	0	0	0	0	0	0	0	0	0	1	1	0	1	0	1	1	0	1	0
36		H2-20-0454-1	7	survived	no MRSA	0	0	0	0	0	0	0	0	0	0	0	0	0	0	0	0	0	0	0	0	0	0	0	0	0	0	0	0	0	0	0	0	0	0	1	1	0	1	1	1	1	0	1	0
37		H1-17-0502-1	7	survived	no MRSA	0	0	0	0	0	0	0	0	0	0	0	0	0	0	0	0	0	0	0	0	0	0	0	0	0	0	0	0	0	0	0	0	0	0	1	0	0	1	1	1	1	0	1	0
38		H2-20-0651-1	7	died	no MRSA	0	0	0	0	0	0	0	0	0	0	0	0	0	0	0	0	0	0	0	0	0	0	0	0	0	0	0	0	0	0	0	0	0	0	1	1	0	1	1	1	1	0	1	0
39		H2-20-0067-1	7	survived	no MRSA	0	0	0	0	0	0	0	0	0	0	0	0	0	0	0	0	0	0	0	0	0	0	0	0	0	0	0	0	0	0	0	0	0	0	1	1	0	1	1	1	1	0	1	0
40		H2-20-0421-1	7	died	no MRSA	0	0	0	0	0	0	0	0	0	0	0	0	0	0	0	0	0	0	0	0	0	0	0	0	0	0	0	0	0	0	0	0	0	0	1	1	0	1	1	1	1	0	1	0
41		H5-17-0255-1	7	survived	no MRSA	0	0	0	0	0	0	0	0	0	0	0	0	0	0	0	0	0	0	0	0	0	0	0	0	0	0	0	0	0	0	0	0	0	0	1	1	0	1	1	1	1	0	1	0
42		H2-20-0178-1	7	survived	no MRSA	0	0	0	0	0	0	0	0	0	0	0	0	0	0	0	0	0	0	0	0	0	0	0	0	0	0	0	0	0	0	0	0	0	0	1	1	0	1	1	1	1	0	1	0
43		H5-17-0233-1	7	died	no MRSA	0	0	0	0	0	0	0	0	0	0	0	0	0	0	0	0	0	0	0	0	0	0	0	0	0	0	0	0	0	0	0	0	0	0	1	1	0	1	1	1	1	0	1	0
44		H2-18-0490-1	7	survived	no MRSA	0	0	0	0	0	0	0	0	0	0	0	0	0	0	0	0	0	0	0	0	0	0	0	0	0	0	0	0	0	0	0	0	0	0	1	1	0	1	1	1	1	0	1	0
45		H2-18-0336-1	7	survived	no MRSA	0	0	0	0	0	0	0	0	0	0	0	0	0	0	0	0	0	0	0	0	0	0	0	0	0	0	0	0	0	0	0	0	0	0	1	1	0	1	1	1	0	0	1	0
46		H5-20-0390-1	7	died	no MRSA	0	0	0	0	0	0	0	0	0	0	0	0	0	0	0	0	0	0	0	0	0	0	0	0	0	0	0	0	0	0	0	0	0	0	1	1	0	1	1	1	1	0	1	0
47		H1-18-0092-1	7	survived	no MRSA	0	0	0	0	0	0	0	0	0	0	0	0	0	0	0	0	0	0	0	0	0	0	0	0	0	0	0	0	0	0	0	0	0	0	1	1	0	1	1	1	1	0	1	0
48		H1-18-0351-1	7	survived	no MRSA	0	0	0	0	0	0	0	0	0	0	0	0	0	0	0	0	0	0	0	0	0	0	0	0	0	0	0	0	0	0	0	0	0	0	1	1	0	1	1	1	1	0	1	0
49		H4-18-0495-1	7	survived	no MRSA	0	0	0	0	0	0	0	0	0	0	0	0	0	0	0	0	0	0	0	0	0	0	0	0	0	0	0	0	0	0	0	0	0	0	1	1	0	1	1	1	1	0	1	0
50		H5-18-0301-1	7	survived	no MRSA	0	0	0	0	0	0	0	0	0	0	0	0	0	0	0	0	0	0	0	0	0	0	0	0	0	0	0	0	0	0	0	0	0	0	0	1	0	1	1	1	1	0	1	0
51		H2-18-0107-1	7	survived	no MRSA	0	0	0	0	0	0	0	0	0	0	0	0	0	0	0	0	0	0	0	0	0	0	0	0	0	0	0	0	0	0	0	0	0	0	1	1	0	1	1	1	1	0	1	0
52		H2-18-0404-1	7	died	no MRSA	0	0	0	0	0	0	0	0	0	0	0	0	0	0	0	0	0	0	0	0	0	0	0	0	0	0	0	0	0	0	0	0	0	0	1	1	0	1	1	1	1	0	1	0
53		H4-18-0089-1	7	died	no MRSA	0	0	0	0	0	0	0	0	0	0	0	0	0	0	0	0	0	0	0	0	0	0	0	0	0	0	0	0	0	0	0	0	0	0	1	1	0	1	1	1	1	0	1	0
54		H2-20-0054-1	7	survived	no MRSA	0	0	0	0	0	0	0	0	1	0	0	0	0	0	0	0	0	0	0	0	0	0	0	0	0	0	0	0	0	0	0	0	0	0	1	1	0	1	1	1	1	0	1	0
55		H4-17-0185-1	7	survived	no MRSA	0	0	0	0	0	0	0	0	0	0	0	0	0	0	0	0	0	0	0	0	0	0	0	0	0	0	0	0	0	0	0	0	0	0	1	1	0	1	1	1	1	0	1	0
56		H2-20-0440-1	7	survived	no MRSA	0	0	0	0	0	0	0	0	0	0	0	0	0	0	0	0	0	0	0	0	0	0	0	0	0	0	0	0	0	0	0	0	0	0	1	1	0	1	1	1	1	0	1	0
57		H4-18-0118-1	7	survived	no MRSA	0	0	0	0	0	0	0	0	0	0	0	0	0	0	0	0	0	0	0	0	0	0	0	0	0	0	0	0	0	0	0	0	0	0	1	1	0	1	1	1	1	0	1	0
58		H2-20-0251-1	7	died	no MRSA	0	0	0	0	0	0	0	0	0	0	0	0	0	0	0	0	0	0	0	0	0	0	0	0	0	0	0	0	0	0	0	0	0	0	1	1	0	1	0	1	1	0	1	0
59		H4-17-0174-1	7	survived	no MRSA	0	0	0	0	0	0	0	0	0	0	0	0	0	0	0	0	0	0	0	0	0	0	0	0	0	0	0	0	0	0	0	0	0	0	1	1	0	1	1	1	1	0	1	0
60		H5-17-0235-1	7	survived	no MRSA	0	0	0	0	0	0	0	0	0	0	0	0	0	0	0	0	0	0	0	0	0	0	0	0	0	0	0	0	0	0	0	0	0	0	1	1	0	1	1	1	1	0	1	0
61		H5-17-0180-1	7	survived	no MRSA	0	0	0	0	0	0	0	0	1	0	0	0	0	0	0	0	0	0	0	0	0	0	0	0	0	0	0	0	0	0	0	0	0	0	1	1	0	1	1	1	1	0	1	0
62		H3-17-0297-1	7	survived	no MRSA	0	0	0	0	0	0	0	0	0	0	0	0	0	0	0	0	0	0	0	0	0	0	0	0	0	0	0	0	0	0	0	0	0	0	1	1	0	1	1	1	1	0	1	0
63		H2-17-0391-1	7	survived	no MRSA	0	0	0	0	0	0	0	0	0	0	0	0	0	0	0	0	0	0	0	0	0	0	0	0	0	0	0	0	0	0	0	0	0	0	1	1	0	1	1	1	1	0	1	0
64		H2-17-0390-1	7	survived	no MRSA	0	0	0	0	0	0	0	0	0	0	0	0	0	0	0	0	0	0	0	0	0	0	0	0	0	0	0	0	0	0	0	0	0	0	1	1	0	1	1	1	1	0	1	0
65		H2-17-0552-1	7	survived	no MRSA	0	0	0	0	0	0	0	0	0	0	0	0	0	0	0	0	0	0	0	0	0	0	0	0	0	0	0	0	0	0	0	0	0	0	0	1	0	1	1	1	1	0	1	0
66		H2-18-0529-1	7	died	no MRSA	0	0	0	0	0	0	0	0	0	0	0	0	0	0	0	0	0	0	0	0	0	0	0	0	0	0	0	0	0	0	0	0	0	0	1	1	0	1	1	1	1	0	1	0
67		H2-18-0447-1	7	survived	no MRSA	0	0	0	0	0	0	0	0	0	0	0	0	0	0	0	0	0	0	0	0	0	0	0	0	0	0	0	0	0	0	0	0	0	0	1	1	0	1	1	1	1	0	1	0
68		H1-18-0093-1	7	survived	no MRSA	0	0	0	0	0	0	0	0	0	0	0	0	0	0	0	0	0	0	0	0	0	0	0	0	0	0	0	0	0	0	0	0	0	0	1	1	0	1	1	0	1	0	1	0
69		H2-20-0019-1	7	survived	no MRSA	0	0	0	0	0	0	0	0	0	0	0	0	0	0	0	0	0	0	0	0	0	0	0	0	0	0	0	0	0	0	0	0	0	0	1	1	0	1	1	1	1	0	1	0
70		H2-17-0604-1	7	survived	no MRSA	0	0	0	0	0	0	0	0	0	0	0	0	0	0	0	0	0	0	0	0	0	0	0	0	0	0	0	0	0	0	0	0	0	0	1	1	0	1	0	1	1	0	1	0
71		H2-18-0108-1	7	survived	no MRSA	0	0	0	0	0	0	0	0	0	0	0	0	0	0	0	0	0	0	0	0	0	0	0	0	0	0	0	0	0	0	0	0	0	0	1	1	0	1	1	1	1	0	1	0
72		H4-18-0397-1	7	died	no MRSA	0	0	0	0	0	0	0	0	0	0	0	0	0	0	0	0	0	0	0	0	0	0	0	0	0	0	0	0	0	0	0	0	0	0	1	1	0	1	1	1	1	0	1	0
73		H2-17-0652-1	-	survived	no MRSA	0	0	0	0	0	0	0	0	0	0	0	0	0	0	0	0	0	0	0	0	0	0	0	0	0	0	0	0	0	0	0	0	0	0	0	1	0	1	1	1	1	0	1	0
74		H4-18-0155-1	7	survived	no MRSA	0	0	0	0	0	0	0	0	0	0	0	0	0	0	0	0	0	0	0	0	0	0	0	0	0	0	0	0	0	0	0	0	0	0	1	1	0	1	1	1	1	0	1	0
75		H2-20-0557-1	7	survived	no MRSA	0	0	0	0	0	0	0	0	0	0	0	0	0	0	0	0	0	0	0	0	0	0	0	0	0	0	0	0	0	0	0	0	0	0	0	1	0	1	1	1	1	0	1	0
76		H2-19-0744-1	7	died	no MRSA	0	0	0	0	0	0	0	0	0	0	0	0	0	0	0	0	0	0	0	0	0	0	0	0	0	0	0	0	0	0	0	0	0	0	1	1	0	1	1	1	1	0	1	0
77		H1-17-0334-1	7	survived	no MRSA	0	0	0	0	0	0	0	0	0	0	0	0	0	0	0	0	0	0	0	0	0	0	0	0	0	0	0	0	0	0	0	0	0	0	1	1	0	1	1	1	1	0	1	0
78		H1-18-0014-1	7	died	no MRSA	0	0	0	0	0	0	0	0	0	0	0	0	0	0	0	0	0	0	0	0	0	0	0	0	0	0	0	0	0	0	0	0	0	0	1	1	0	1	1	1	1	0	1	0
79		H4-18-0364-1	7	survived	no MRSA	0	0	0	0	0	0	0	0	0	0	0	0	0	0	0	0	0	0	0	0	0	0	0	0	0	0	0	0	0	0	0	0	0	0	1	1	0	1	1	1	1	0	1	0
80		H4-18-0473-1	-	survived	no MRSA	0	0	0	0	0	0	0	0	0	0	0	0	0	0	0	0	0	0	0	0	0	0	0	0	0	0	0	0	0	0	0	0	0	0	1	1	0	1	1	1	1	0	1	0
81		H4-18-0309-1	7	died	no MRSA	0	0	0	0	0	0	0	0	0	0	0	0	0	0	0	0	0	0	0	0	0	0	0	0	0	0	0	0	0	0	0	0	0	0	1	1	0	1	1	1	1	0	1	0
82		H2-17-0475-1	7	died	no MRSA	0	0	0	0	0	0	0	0	0	0	0	0	0	0	0	0	0	0	0	0	0	0	0	0	0	0	0	0	0	0	0	0	0	0	1	1	0	1	1	1	1	0	1	0
83		H4-17-0139-1	7	died	no MRSA	0	0	0	0	0	0	0	0	0	0	0	0	0	0	0	0	0	0	0	0	0	0	0	0	0	0	0	0	0	0	0	0	0	0	1	1	0	1	1	1	1	0	1	0
84		H4-17-0301-1	7	survived	no MRSA	0	0	0	0	0	0	0	0	0	0	0	0	0	0	0	0	0	0	0	0	0	0	0	0	0	0	0	0	0	0	0	0	0	0	1	1	0	1	1	1	1	0	1	0
85		H4-17-0230-1	7	survived	no MRSA	0	0	0	0	0	0	0	0	0	0	0	0	0	0	0	0	0	0	0	0	0	0	0	0	0	0	0	0	0	0	0	0	0	0	1	1	0	1	1	1	1	0	1	0
86		H2-18-0526-1	7	survived	no MRSA	0	0	0	0	0	0	0	0	1	0	0	0	0	0	0	0	0	0	0	0	0	0	0	0	0	0	0	0	0	0	0	0	0	0	1	1	0	1	1	1	1	0	1	0
87		H2-17-0626-1	7	survived	no MRSA	0	0	0	0	0	0	0	0	0	0	0	0	0	0	0	0	0	0	0	0	0	0	0	0	0	0	0	0	0	0	0	0	0	0	1	1	0	1	0	1	1	0	1	0
88		H2-20-0082-1	7	died	no MRSA	0	0	0	0	0	0	0	0	0	0	0	0	0	0	0	0	0	0	0	0	0	0	0	0	0	0	0	0	0	0	0	0	0	0	1	1	0	1	1	1	1	0	1	0
89		H4-18-0026-1	7	survived	no MRSA	0	0	0	0	0	0	0	0	0	0	0	0	0	0	0	0	0	0	0	0	0	0	0	0	0	0	0	0	0	0	0	0	0	0	1	0	0	1	1	1	1	0	1	0
90		H2-20-0560-1	7	died	no MRSA	0	0	0	0	0	0	0	0	0	0	0	0	0	0	0	0	0	0	0	0	0	0	0	0	0	0	0	0	0	0	0	0	0	0	1	1	0	1	1	1	1	0	1	0
91		H2-19-0026-1	7	survived	no MRSA	0	0	0	0	0	0	0	0	0	0	0	0	0	0	0	0	0	0	0	0	0	0	0	0	0	0	0	0	0	0	0	0	0	0	1	1	0	1	1	1	1	0	1	0
92		H5-20-0275-1	7	survived	no MRSA	0	0	0	0	0	0	0	0	0	0	0	0	0	0	0	0	0	0	0	0	0	0	0	0	0	0	0	0	0	0	0	0	0	0	1	1	0	1	1	1	1	0	0	0
93		H2-17-0273-1	7	survived	no MRSA	0	0	0	0	0	0	0	0	1	0	0	0	0	0	0	0	0	0	0	0	0	0	0	0	0	0	0	0	0	0	0	0	0	0	1	1	0	1	1	1	1	0	1	0
94		H2-17-0423-1	7	survived	no MRSA	0	0	0	0	0	0	0	0	0	0	0	0	0	0	0	0	0	0	0	0	0	0	0	0	0	0	0	0	0	0	0	0	0	0	1	1	0	1	1	1	1	0	1	0
95		H2-17-0234-1	7	survived	no MRSA	0	0	0	0	0	0	0	0	0	0	0	0	0	0	0	0	0	0	0	0	0	0	0	0	0	0	0	0	0	0	0	0	0	0	1	1	0	1	1	1	1	0	1	0
96		H5-17-0094-1	7	survived	no MRSA	0	0	0	0	0	0	0	0	0	0	0	0	0	0	0	0	0	0	0	0	0	0	0	0	0	0	0	0	0	0	0	0	0	0	1	1	0	1	1	1	1	0	1	0
97		H4-18-0103-1	7	died	no MRSA	0	0	0	0	0	0	0	0	0	0	0	0	0	0	0	0	0	0	0	0	0	0	0	0	0	0	0	0	0	0	0	0	0	0	1	1	0	1	1	1	1	0	1	0
98		H5-19-0318-1	7	survived	no MRSA	0	0	0	0	0	0	0	0	0	0	0	0	0	0	0	0	0	0	0	0	0	0	0	0	0	0	0	0	0	0	0	0	0	0	1	1	0	1	1	1	1	0	1	0
99		H2-18-0647-1	7	survived	no MRSA	0	0	0	0	0	0	0	0	0	0	0	0	0	0	0	0	0	0	0	0	0	0	0	0	0	0	0	0	0	0	0	0	0	0	1	1	0	1	1	1	1	0	1	0
100		H2-18-0090-1	7	survived	no MRSA	0	0	0	0	0	0	0	0	0	0	0	0	0	0	0	0	0	0	0	0	1	0	0	0	0	0	0	0	0	0	0	0	0	0	1	1	0	1	1	1	1	0	1	0
101		H5-18-0070-1	672	survived	no MRSA	0	0	0	0	0	0	0	0	0	0	0	0	1	0	0	0	0	0	1	0	1	0	0	0	0	1	0	0	0	0	0	1	0	1	0	1	0	1	0	1	1	1	1	1
102		H4-17-0433-1	672	survived	no MRSA	0	0	0	0	0	0	0	0	0	0	0	0	0	0	0	0	0	0	1	0	0	0	0	0	0	0	0	0	0	0	0	1	0	1	0	1	0	1	0	1	1	1	0	1
103		H2-17-0445-1	25	survived	no MRSA	0	0	0	0	0	0	0	0	0	0	0	0	0	0	0	0	0	0	0	0	0	0	0	0	0	0	0	1	1	1	1	0	1	1	1	0	0	1	1	0	1	0	1	1
104		H5-18-0044-1	25	survived	no MRSA	0	0	0	0	0	0	0	0	0	0	0	0	1	0	0	0	0	0	0	1	1	0	0	0	0	0	0	1	1	1	1	0	1	1	1	0	0	1	1	0	1	0	0	1
105		H4-18-0135-1	25	survived	no MRSA	0	0	0	0	0	0	0	0	0	0	0	0	0	0	0	1	0	0	0	1	0	0	0	0	0	0	0	1	1	1	1	0	1	1	1	0	0	1	1	0	1	0	1	1
106		H4-18-0400-1	25	survived	no MRSA	0	0	0	0	0	0	0	0	0	0	0	0	0	0	0	1	1	0	0	0	0	0	0	0	0	0	0	1	1	1	1	0	1	1	1	0	0	1	1	0	1	0	1	1
107		H4-18-0240-1	-	survived	no MRSA	0	0	0	0	0	0	0	0	0	0	0	0	0	0	0	0	0	0	0	0	0	0	0	0	0	0	0	1	1	1	1	0	1	1	1	0	0	1	1	0	1	0	1	1
108		H1-18-0575-1	25	died	no MRSA	1	0	0	1	0	0	0	0	0	0	0	0	0	0	0	1	1	0	0	1	0	0	0	0	0	0	0	1	1	1	1	0	1	0	1	0	0	1	1	0	1	0	1	1
109		H1-17-0400-1	-	survived	no MRSA	0	0	0	0	0	0	0	0	0	0	0	0	0	0	0	0	0	0	0	1	0	0	0	0	0	0	0	1	1	1	1	0	1	1	1	0	0	1	1	0	1	0	1	1
110		H5-17-0087-1	1 (CC1)	survived	no MRSA	1	0	0	0	0	0	0	0	0	0	0	0	0	0	1	0	1	0	0	0	0	0	0	0	1	1	0	0	0	0	0	1	1	1	0	0	0	0	1	1	0	0	1	1
111		H4-17-0126-1	1 (CC1)	died	no MRSA	1	0	0	0	0	0	0	0	0	0	0	0	0	0	1	0	1	0	0	0	0	0	0	0	1	1	0	0	0	0	0	1	1	1	0	0	0	0	1	1	0	0	1	1
112		H2-17-0477-1	1 (CC1)	survived	no MRSA	0	0	0	0	0	0	0	0	1	0	0	0	0	0	1	1	1	0	0	0	0	0	0	0	1	1	0	1	0	0	0	0	1	1	1	0	1	0	1	1	0	0	1	1
113		H4-18-0228-1	1 (CC1)	survived	MRSA	0	0	0	0	0	0	0	0	0	0	0	0	0	0	0	0	0	0	0	0	0	0	0	0	1	1	0	1	0	0	0	0	1	1	1	0	1	0	1	1	0	0	1	1
114		H5-18-0202-1	1 (CC1)	survived	no MRSA	0	0	0	0	0	0	0	0	0	0	0	0	0	0	0	0	0	0	0	0	0	0	0	0	1	1	0	0	0	0	0	0	1	0	1	0	1	0	1	1	0	0	1	1
115		H5-17-0226-1	1 (CC1)	survived	no MRSA	0	0	0	0	0	0	0	0	0	0	0	0	0	0	0	0	0	0	0	0	0	0	0	0	1	1	0	1	0	0	0	0	1	1	1	0	1	0	1	1	0	0	1	1
116		H2-20-0296-1	188	survived	no MRSA	0	0	0	0	0	0	0	0	0	0	0	0	1	0	0	0	0	0	0	0	0	0	0	0	0	0	1	0	0	0	1	0	1	1	1	0	0	0	0	0	0	0	1	1
117		H5-17-0289-1	188	survived	no MRSA	0	0	0	0	0	0	0	0	1	0	0	0	1	0	1	0	0	0	0	0	0	0	0	0	0	0	1	0	0	0	1	1	1	1	1	0	0	0	0	0	0	0	1	1
118		H2-20-0381-1	188	survived	no MRSA	0	0	0	0	0	0	0	0	0	0	0	0	1	0	1	0	0	0	0	0	0	0	0	0	0	0	1	0	0	0	1	1	1	1	1	0	0	0	0	0	0	0	1	0
119		H2-19-0722-1	188	died	no MRSA	0	0	0	0	0	0	0	0	0	0	0	0	1	0	1	0	0	0	0	0	0	0	0	0	0	0	1	0	0	0	1	1	1	1	1	0	0	0	0	0	0	0	1	1
120		H2-17-0639-1	188	survived	no MRSA	0	0	0	0	0	0	0	0	0	0	0	0	1	0	1	0	0	0	0	0	0	0	0	0	0	0	1	0	0	0	1	1	0	1	1	0	0	0	0	0	0	0	1	1
121		H2-20-0011-1	188	survived	no MRSA	0	0	0	0	0	0	0	0	0	0	0	0	1	0	1	0	0	0	0	1	0	0	0	0	0	0	1	0	0	0	1	1	1	1	1	0	0	0	0	0	0	0	1	1
122		H2-17-0382-1	-	survived	no MRSA	0	0	0	0	0	0	0	0	0	0	0	0	1	0	1	0	0	0	0	0	0	0	0	0	0	0	1	0	0	0	1	1	1	1	1	0	0	0	0	0	0	0	1	1
123		H5-20-0254-1	630	survived	no MRSA	0	0	0	0	0	0	0	0	0	0	0	0	0	0	0	0	0	0	0	0	0	0	0	0	0	0	1	1	1	1	1	1	0	1	1	1	1	1	1	1	0	0	1	1
124		H5-20-0392-1	8 (CC8)	survived	no MRSA	0	0	1	0	0	0	0	0	1	0	0	0	0	0	0	0	0	0	0	0	0	0	0	0	0	0	0	1	1	1	1	1	1	1	1	1	1	1	1	1	0	1	1	1
125		H3-17-0251-1	8 (CC8)	survived	no MRSA	1	0	0	0	0	0	0	1	0	0	0	0	0	0	0	0	0	0	0	1	1	0	0	0	0	0	0	1	0	1	1	1	1	1	1	1	1	0	1	1	0	1	1	0
126		H2-20-0391-1	8 (CC8)	survived	no MRSA	0	0	0	0	0	0	0	0	0	0	0	0	1	0	0	0	0	0	0	0	1	0	0	0	0	0	0	1	0	1	1	1	1	1	1	1	1	1	1	1	0	1	1	1
127		H2-18-0433-1	8 (CC8)	survived	no MRSA	0	0	0	0	0	0	0	0	0	0	0	0	0	0	0	0	1	0	0	1	0	0	0	0	0	0	0	1	0	1	1	1	1	1	1	1	1	1	1	1	0	1	1	1
128		H2-18-0341-1	8 (CC8)	survived	no MRSA	0	0	0	0	0	0	0	0	0	0	0	0	0	0	0	0	1	0	0	1	0	0	0	0	0	0	0	1	0	1	1	1	1	1	1	1	1	1	1	1	0	1	1	1
129		H2-20-0111-1	8 (CC8)	survived	no MRSA	0	0	0	0	0	0	0	0	0	0	0	0	0	0	0	0	0	0	0	0	0	0	0	0	0	0	0	1	0	1	1	1	1	1	1	1	1	1	1	1	0	1	0	1
130		H2-18-0443-1	8 (CC8)	survived	no MRSA	0	0	0	0	0	0	0	0	0	0	0	0	1	0	0	0	0	0	0	0	1	0	0	0	0	0	0	1	0	1	1	1	1	1	1	1	1	1	1	1	0	1	1	1
131		H4-18-0404-1	8 (CC8)	died	no MRSA	0	0	0	0	0	0	0	0	1	0	0	0	0	0	0	0	0	0	0	0	0	0	0	0	0	0	0	1	0	1	1	0	1	1	1	1	1	1	1	1	0	1	1	1
132		H4-18-0322-1	8 (CC8)	survived	no MRSA	0	0	0	0	0	0	0	0	0	0	0	0	0	0	0	0	0	0	0	0	1	0	0	0	0	0	0	1	0	1	1	1	1	1	1	1	1	1	1	1	0	1	1	1
133		H5-18-0160-1	8 (CC8)	survived	no MRSA	0	0	0	0	0	0	0	0	0	0	0	0	1	0	0	0	0	0	0	0	1	0	0	0	0	0	0	1	0	1	1	1	1	1	1	0	1	1	1	1	0	1	1	1
134		H4-18-0458-1	8 (CC8)	survived	no MRSA	0	0	0	0	0	0	0	0	0	0	0	0	0	0	0	0	0	0	0	0	0	0	0	0	0	0	0	1	0	1	1	1	1	1	1	1	1	1	0	1	0	1	1	1
135		H1-18-0075-1	-	survived	no MRSA	0	1	0	0	1	1	1	1	0	0	0	0	1	1	0	0	0	0	0	1	1	0	0	0	0	0	0	1	1	1	1	1	1	1	1	1	1	1	1	1	0	1	1	1
136		H4-17-0416-1	8 (CC8)	survived	no MRSA	0	0	0	0	1	1	1	1	0	0	0	0	0	1	0	0	0	0	0	1	0	0	0	0	0	0	0	1	0	1	1	0	1	1	1	1	1	1	1	1	0	1	1	1
137		H5-19-0334-1	8 (CC8)	survived	no MRSA	0	1	0	0	1	1	1	1	0	0	0	0	0	1	0	0	0	0	0	1	0	0	0	0	0	0	0	1	1	1	1	1	1	1	0	1	1	1	1	1	0	1	1	1
138		H2-20-0558-1	8 (CC8)	survived	no MRSA	0	0	0	0	0	0	0	0	0	0	0	0	0	0	0	0	0	0	0	0	0	0	0	0	0	0	0	1	1	1	1	1	1	1	1	1	1	1	1	1	0	1	1	1
139		H3-17-0215-1	8 (CC8)	survived	no MRSA	0	1	0	0	1	1	1	1	0	0	0	0	0	1	0	0	0	0	0	1	0	0	0	0	0	0	0	1	1	1	1	1	1	1	0	1	1	1	1	1	0	1	1	1
140		H4-17-0353-1	619	survived	no MRSA	0	0	0	0	0	0	0	0	0	0	0	0	0	0	0	0	0	0	0	0	0	0	0	0	0	0	0	1	1	1	1	1	1	1	1	0	1	1	1	1	0	1	1	1
141		H5-20-0004-1	8 (CC8)	died	no MRSA	0	0	0	0	0	0	0	0	0	0	0	0	0	0	0	1	0	0	0	0	0	0	0	0	0	0	0	1	1	1	1	1	1	1	1	1	1	1	1	1	0	1	1	1
142		H5-17-0095-1	6853	survived	no MRSA	0	0	0	0	0	0	0	0	0	0	0	0	0	0	0	0	0	0	0	0	0	0	0	0	0	0	0	1	1	1	1	1	1	1	1	1	1	1	1	1	0	1	1	1
143		H2-20-0022-1	2416	survived	no MRSA	0	0	0	0	0	0	0	0	0	0	0	0	0	0	0	0	0	0	0	0	0	0	0	0	0	0	0	0	1	1	1	1	1	0	1	1	1	1	1	1	0	1	1	1
144		H5-18-0145-1	8 (CC8)	died	MRSA	1	1	0	0	1	1	1	1	0	0	0	0	0	1	0	1	1	0	0	1	0	0	0	0	0	0	0	1	1	1	1	1	1	1	0	1	1	1	1	1	0	1	1	1
145		H2-18-0161-1	8 (CC8)	died	MRSA	2	1	1	0	1	1	1	1	1	0	0	0	1	1	0	1	1	0	0	1	1	0	0	0	0	0	0	1	1	1	1	0	1	1	1	1	1	1	1	1	0	1	1	1
146		H2-17-0377-1	-	died	no MRSA	0	1	0	0	1	1	1	1	0	0	0	0	1	1	0	0	0	0	0	1	1	0	0	0	0	0	0	1	1	1	1	0	1	1	1	1	1	1	1	1	0	1	1	1
147		H4-17-0181-1	8 (CC8)	died	no MRSA	0	1	0	0	1	1	1	1	0	0	0	0	0	1	0	0	0	0	0	1	0	0	0	0	0	0	0	1	1	1	1	1	1	1	1	1	1	1	1	1	0	1	1	1
148		H2-17-0666-1	8 (CC8)	survived	no MRSA	0	1	0	0	1	1	1	1	0	0	0	0	0	1	0	0	0	0	0	1	0	0	0	0	0	0	0	1	1	1	1	1	1	1	1	1	1	1	1	1	0	1	1	1
149		H5-17-0037-1	8 (CC8)	survived	no MRSA	0	1	0	0	1	1	1	1	0	0	0	0	0	1	0	0	0	0	0	1	0	0	0	0	0	0	0	1	1	1	1	1	1	1	1	1	1	1	1	1	0	1	1	1
150		H4-18-0190-1	3473	survived	no MRSA	0	0	0	0	0	0	0	0	0	0	0	0	0	0	0	0	0	0	0	0	0	0	0	0	0	0	0	1	1	1	1	1	1	0	1	1	1	1	1	1	0	1	1	1
151		H4-18-0231-1	8 (CC8)	survived	no MRSA	0	1	0	0	1	1	1	1	0	0	0	0	1	1	0	0	0	0	0	1	1	0	0	0	0	0	0	1	1	1	1	1	1	1	1	1	1	1	1	1	0	1	1	1
152		H1-17-0477-1	8 (CC8)	survived	no MRSA	0	0	0	0	0	0	0	0	0	0	0	0	0	0	0	0	0	0	0	0	0	0	0	0	0	0	0	1	1	1	1	1	1	1	1	1	1	1	1	1	0	1	1	1
153		H2-18-0606-1	8 (CC8)	died	no MRSA	0	1	0	0	1	1	1	1	0	0	0	0	0	1	0	0	0	0	0	1	0	0	0	0	0	0	0	1	1	1	1	1	1	1	1	1	1	1	1	1	0	1	1	1
154		H2-18-0593-1	8 (CC8)	survived	no MRSA	0	0	0	0	1	1	1	1	0	0	0	0	0	1	0	0	0	0	0	1	0	0	0	0	0	0	0	1	1	1	1	1	1	1	1	1	1	1	1	1	0	1	1	1
155		H2-20-0575-1	8 (CC8)	died	no MRSA	0	1	0	0	1	1	1	1	0	0	0	0	0	1	0	0	0	0	0	1	0	0	0	0	0	0	0	1	1	1	1	1	1	1	1	1	1	1	1	1	0	1	1	1
156		H2-20-0098-1	8 (CC8)	died	no MRSA	0	0	0	0	0	0	0	0	0	0	0	0	0	0	0	0	0	0	0	0	0	0	0	0	0	0	0	1	1	1	1	1	1	1	1	1	1	1	1	1	0	1	1	1
157		H1-17-0463-1	8 (CC8)	survived	no MRSA	1	0	0	0	0	0	0	0	0	0	0	0	0	0	0	0	1	0	0	0	0	0	0	0	0	0	0	1	1	1	1	1	1	1	1	1	1	1	1	1	0	1	1	1
158		H2-20-0471-1	-	survived	no MRSA	1	0	0	0	0	0	0	0	0	0	0	0	0	0	0	0	1	0	0	0	0	0	0	0	0	0	0	1	1	1	1	1	1	1	1	1	1	1	1	1	0	1	0	1
159		H2-18-0457-1	8 (CC8)	survived	no MRSA	1	1	1	0	1	1	1	1	0	0	0	0	0	1	0	0	1	0	0	1	0	0	0	0	0	0	0	1	1	1	1	1	1	1	1	1	1	1	1	1	0	1	0	1
160		H2-18-0460-1	8 (CC8)	died	no MRSA	1	1	1	0	1	1	1	1	0	0	0	0	0	1	0	0	1	0	0	1	0	0	0	0	0	0	0	1	1	1	1	1	1	1	1	1	1	0	1	1	0	1	0	1
161		H2-17-0621-1	8 (CC8)	died	no MRSA	1	1	1	0	1	1	1	1	0	0	0	0	0	1	0	0	1	0	0	1	0	0	0	0	0	0	0	1	1	1	1	1	1	1	1	1	1	1	1	1	0	1	0	1
162		H5-20-0041-1	20	survived	no MRSA	0	0	0	0	0	0	0	0	0	1	0	0	1	1	1	0	0	0	1	1	1	0	0	0	1	1	1	0	0	1	1	1	1	1	1	0	0	0	1	1	0	0	1	1
163		H4-17-0333-1	20	died	no MRSA	0	0	0	0	0	0	0	0	0	1	1	0	0	1	1	0	0	0	1	1	0	0	0	1	1	1	1	0	0	1	1	1	1	1	1	1	0	0	1	1	0	0	1	1
164		H2-18-0507-1	582	survived	no MRSA	0	0	0	0	0	0	0	0	0	1	1	1	0	1	0	0	0	1	1	1	0	1	1	1	1	1	1	1	1	1	1	1	1	1	1	1	1	1	1	1	1	1	1	1
165		H2-18-0141-1	-	survived	no MRSA	0	0	0	1	0	0	0	0	0	1	1	1	1	1	0	1	1	1	1	1	1	1	1	1	1	1	1	1	1	1	1	1	1	1	1	1	1	1	1	1	1	1	1	1
166		H2-20-0303-1	582	survived	no MRSA	0	0	0	0	0	0	0	0	0	1	1	1	1	0	0	0	0	1	1	1	1	1	1	1	1	0	1	1	1	1	1	1	1	1	0	1	1	1	1	1	1	1	1	1
167		H5-18-0318-1	582	survived	no MRSA	0	0	0	0	0	0	0	0	0	1	1	1	0	1	0	0	0	1	1	1	0	1	1	1	1	1	1	1	1	1	1	1	1	1	1	1	1	1	1	1	1	1	1	1
168		H4-17-0388-1	582	survived	no MRSA	0	0	0	0	0	0	0	0	0	1	1	1	1	1	0	0	0	1	1	1	1	1	1	1	1	1	1	1	1	1	1	1	1	1	1	1	1	1	1	1	1	1	1	1
169		H2-20-0360-1	582	died	no MRSA	0	0	0	0	0	0	0	0	0	1	1	1	0	0	0	0	0	1	1	1	0	1	1	1	1	1	1	1	1	1	1	1	1	1	1	1	1	1	1	1	1	1	1	1
170		H2-20-0153-1	582	survived	no MRSA	1	0	0	0	0	0	0	0	0	1	1	1	0	1	0	0	0	1	1	1	1	1	1	1	1	0	1	1	1	1	1	1	1	0	1	0	1	1	1	1	1	1	1	1
171		H2-18-0723-1	582	survived	no MRSA	0	0	0	0	0	0	0	0	0	1	1	1	0	1	0	0	0	1	1	1	0	1	1	1	1	1	1	1	1	1	1	1	1	0	0	1	1	1	1	1	1	1	1	1
172		H4-17-0352-1	582	survived	no MRSA	0	0	0	0	0	0	0	0	0	1	1	1	0	1	0	0	0	1	1	1	0	1	1	1	1	1	1	1	1	1	1	1	1	1	1	1	1	1	1	1	1	1	1	1
173		H2-18-0439-1	582	died	no MRSA	0	0	0	1	0	0	0	0	0	1	1	1	0	1	0	1	1	1	1	1	1	1	1	1	1	1	1	1	1	1	1	1	1	1	1	1	1	1	1	1	1	1	1	1
174		H5-19-0377-1	582	survived	no MRSA	0	0	0	0	0	0	0	0	0	1	1	1	0	1	0	0	0	1	1	1	0	1	1	1	1	1	1	1	1	1	1	1	0	1	1	1	1	1	1	1	1	1	1	1
175		H2-17-0417-1	582	died	no MRSA	1	0	0	0	0	0	0	0	0	1	1	1	0	1	0	0	1	1	1	1	0	1	1	1	1	1	1	1	1	1	1	1	1	1	1	1	1	1	1	1	1	1	1	1
176		H2-20-0656-1	582	survived	no MRSA	0	0	0	0	0	0	0	0	0	1	1	1	0	1	0	0	0	0	1	1	0	1	1	1	1	1	1	1	1	1	1	1	1	1	1	1	1	1	1	1	1	1	1	1
177		H5-20-0335-1	582	survived	no MRSA	0	0	0	0	0	0	0	0	0	1	1	1	0	1	0	1	1	1	1	1	0	1	1	1	1	1	1	1	1	1	1	1	1	1	1	1	1	1	1	1	1	1	1	1
178		H5-19-0349-1	582	survived	no MRSA	0	0	0	0	0	0	0	0	0	0	1	1	0	1	0	0	0	1	1	1	0	1	1	1	1	1	1	1	1	1	1	1	1	1	1	0	1	1	1	1	1	1	1	1
179		H4-18-0130-1	582	survived	no MRSA	0	0	0	0	0	0	0	0	0	1	1	0	0	1	0	0	0	1	1	1	0	1	1	1	1	1	1	1	1	1	1	1	1	1	1	1	1	1	1	1	1	1	1	1
180		H2-18-0412-1	582	died	no MRSA	0	0	0	1	0	0	0	0	0	1	1	1	0	1	0	1	1	1	1	1	0	1	1	1	1	1	1	1	1	1	1	1	1	1	1	1	1	1	1	1	1	1	1	1
181		H2-19-0046-1	582	survived	no MRSA	0	0	0	0	0	0	0	0	0	1	1	1	0	1	0	1	1	1	1	1	0	1	1	1	1	1	1	1	1	1	1	1	1	1	1	1	1	1	1	1	1	1	1	1
182		H2-17-0206-1	582	died	no MRSA	0	0	0	0	0	0	0	0	0	1	1	1	0	1	0	1	1	1	1	1	0	1	1	1	1	1	1	1	1	1	1	1	1	1	1	1	1	1	1	1	1	1	1	1
183		H2-17-0422-1	582	survived	no MRSA	0	0	0	0	0	0	0	0	0	1	1	0	0	1	0	0	0	1	1	1	0	1	1	1	1	1	1	1	1	1	1	1	1	1	1	1	1	1	1	1	1	1	1	1
184		H4-18-0110-1	582	died	no MRSA	0	0	0	0	0	0	0	0	0	1	1	1	0	1	0	0	0	1	1	1	0	1	1	1	1	1	1	1	1	1	1	1	1	1	1	1	1	1	1	1	1	1	1	1
185		H4-17-0231-1	582	survived	no MRSA	0	0	0	0	0	0	0	0	0	1	1	1	0	1	0	0	0	1	1	1	0	1	1	1	1	1	1	1	1	1	1	1	1	1	1	1	1	1	1	1	1	1	1	1
186		H4-18-0157-1	582	survived	no MRSA	0	0	0	1	0	0	0	0	0	1	1	1	1	1	0	0	1	1	1	1	1	1	1	1	1	1	1	1	1	1	1	1	1	1	1	1	1	1	1	1	1	1	1	1
187		H4-18-0120-1	582	survived	no MRSA	0	0	0	0	0	0	0	0	0	1	1	1	0	1	0	0	0	1	1	1	0	1	1	1	1	1	1	1	1	1	1	1	1	1	1	1	1	1	1	1	1	1	1	1
188		H2-20-0169-1	582	died	no MRSA	0	0	0	0	0	0	0	0	0	1	1	1	0	1	0	0	0	1	1	1	0	1	1	1	1	1	1	1	1	1	1	1	1	1	1	1	1	1	1	1	1	1	1	1
189		H4-17-0190-1	582	survived	no MRSA	0	0	0	0	0	0	0	0	0	1	1	1	0	1	0	1	0	1	1	1	0	1	1	1	1	1	1	1	1	1	1	1	1	0	1	1	1	1	1	1	1	1	1	1
190		H4-17-0156-1	582	survived	no MRSA	0	0	0	0	0	0	0	0	1	1	1	1	0	1	0	0	0	1	1	1	0	1	1	1	1	1	1	1	1	1	1	1	1	1	1	1	1	1	1	1	1	1	1	1
191		H2-18-0630-1	582	died	no MRSA	0	0	0	0	0	0	0	0	0	1	1	1	1	1	0	0	0	1	1	0	1	1	1	1	1	1	1	1	1	1	1	1	1	1	1	1	1	1	1	1	1	1	1	1
192		H4-17-0405-1	582	survived	no MRSA	0	0	0	0	0	0	0	0	0	1	1	1	0	0	0	0	0	1	1	1	0	1	1	1	1	1	1	1	1	1	1	1	1	1	1	1	1	1	1	1	1	1	1	1
193		H4-17-0164-1	582	survived	no MRSA	0	0	0	0	0	0	0	0	1	1	1	1	0	1	0	0	0	1	1	1	0	1	1	1	1	1	1	1	1	1	1	1	1	1	1	1	1	1	1	1	1	1	1	1
194		H4-17-0441-1	582	died	no MRSA	0	0	0	0	0	0	0	0	0	1	1	1	1	1	0	0	0	1	1	1	1	1	1	1	1	1	1	1	1	1	1	1	1	1	1	0	1	1	1	1	1	1	1	1
195		H4-17-0105-1	582	died	no MRSA	0	0	0	1	0	0	0	0	0	1	1	1	1	1	0	1	1	1	1	1	1	1	1	1	1	1	1	1	1	1	1	1	1	1	1	1	1	1	1	1	1	1	1	1
196		H4-18-0329-1	15 (CC15)	survived	no MRSA	0	0	0	0	0	0	0	0	0	0	0	1	0	0	0	1	1	1	1	0	0	1	1	1	1	1	1	1	1	1	0	1	1	1	1	1	1	1	1	1	1	1	1	1
197		H4-17-0273-1	15 (CC15)	died	no MRSA	0	0	0	0	0	0	0	0	0	0	0	1	0	0	0	1	0	1	1	0	0	1	1	1	1	1	1	1	1	1	1	1	1	1	1	1	1	1	1	1	1	1	1	1
198		H2-18-0100-1	15 (CC15)	died	no MRSA	0	0	0	0	0	0	0	0	0	0	0	1	1	0	0	0	0	1	1	0	1	1	1	1	1	1	1	1	1	1	1	1	1	1	1	0	1	1	1	1	1	1	1	1
199		H5-17-0122-1	15 (CC15)	died	no MRSA	0	0	0	0	0	0	0	0	0	0	0	1	0	0	0	0	0	1	1	0	0	1	1	1	1	1	1	1	1	1	1	1	1	1	1	1	1	1	1	1	1	1	1	1
200		H1-17-0372-1	15 (CC15)	survived	no MRSA	0	0	0	0	0	0	0	0	0	0	0	1	0	0	0	0	0	1	1	0	0	0	1	1	1	1	1	1	1	1	1	1	1	1	1	0	1	1	1	1	1	1	1	1
201		H3-17-0187-1	15 (CC15)	survived	no MRSA	0	0	0	0	0	0	0	0	0	0	0	0	0	0	0	0	0	1	1	0	0	0	1	1	1	1	1	1	1	1	1	1	1	1	1	1	1	1	1	1	1	1	1	1
202		H2-18-0608-1	15 (CC15)	survived	no MRSA	0	0	0	1	0	0	0	0	0	0	0	0	0	0	0	1	0	1	0	0	0	1	1	1	1	1	1	1	1	1	1	1	1	1	1	1	1	1	1	1	1	1	0	1
203		H4-18-0112-1	15 (CC15)	survived	no MRSA	0	0	0	0	0	0	0	0	0	0	0	0	0	0	0	0	0	1	1	0	0	1	1	1	1	1	1	1	1	1	1	1	1	1	1	1	1	1	0	1	1	1	1	1
204		H5-18-0272-1	15 (CC15)	survived	no MRSA	0	0	0	0	0	0	0	0	0	0	0	1	1	0	0	0	0	1	1	0	1	1	1	1	1	1	1	1	1	1	1	1	1	1	0	1	1	1	1	1	1	1	1	1
205		H4-18-0415-1	15 (CC15)	survived	no MRSA	0	0	0	0	0	0	0	0	0	0	0	1	0	0	0	0	0	1	1	0	0	1	1	1	1	1	1	1	1	1	1	1	1	1	0	1	1	1	1	1	1	1	1	1
206		H4-18-0268-1	15 (CC15)	survived	no MRSA	0	0	0	0	0	0	0	0	0	0	0	1	0	0	0	0	0	1	1	0	0	1	1	1	1	1	1	1	1	1	1	1	1	1	0	1	1	1	1	1	1	1	1	1
207		H4-18-0220-1	15 (CC15)	survived	no MRSA	0	0	0	0	0	0	0	0	0	0	0	1	0	0	0	0	0	1	1	0	0	1	1	1	1	1	1	1	1	1	1	1	1	1	0	1	1	1	1	1	1	1	1	1
208		H2-20-0672-1	15 (CC15)	survived	no MRSA	1	0	0	0	0	0	0	0	0	0	0	1	0	0	0	0	1	1	1	0	0	1	1	1	1	1	1	1	1	1	1	1	1	1	0	1	1	1	1	1	1	1	1	1
209		H2-18-0621-1	15 (CC15)	survived	no MRSA	1	0	0	0	0	0	0	0	0	0	0	1	0	0	0	0	1	1	1	0	0	1	1	1	1	1	1	1	1	1	1	1	1	1	1	1	1	1	1	1	1	1	1	1
210		H5-18-0375-1	15 (CC15)	died	no MRSA	0	0	0	0	0	0	0	0	0	0	0	1	0	0	0	0	0	1	1	0	0	1	1	1	1	1	1	1	1	1	1	1	1	1	1	1	1	1	1	1	1	1	1	1
211		H2-20-0554-1	15 (CC15)	died	no MRSA	0	0	0	0	0	0	0	0	0	0	0	0	1	0	0	0	0	1	1	0	1	1	1	1	1	1	1	1	1	1	1	1	1	1	1	1	1	1	1	1	1	1	1	1
212		H2-20-0248-1	-	died	no MRSA	0	0	0	0	0	0	0	0	0	0	0	1	0	0	0	1	0	1	1	0	0	1	1	1	1	1	1	1	1	1	1	1	1	1	1	1	1	1	1	1	1	1	1	1
213		H2-20-0544-1	15 (CC15)	survived	no MRSA	1	0	0	0	0	0	0	0	0	0	0	0	0	0	0	1	1	1	0	0	0	1	1	1	1	0	0	1	1	1	1	1	1	0	1	0	0	0	1	0	1	0	1	1
214		H5-20-0415-1	15 (CC15)	died	no MRSA	1	0	0	0	0	0	0	0	0	0	0	1	0	0	0	0	0	1	1	0	0	1	1	1	1	1	1	1	1	1	1	1	1	1	0	1	1	1	1	1	1	1	1	1
215		H4-17-0088-1	15 (CC15)	survived	no MRSA	0	0	0	0	0	0	0	0	0	0	0	1	0	0	0	0	0	1	1	0	0	1	0	1	1	1	1	1	1	1	1	1	1	1	1	1	1	1	1	1	0	1	1	1
216		H2-18-0464-1	15 (CC15)	survived	no MRSA	0	0	0	0	0	0	0	0	0	0	0	0	0	0	0	0	0	1	1	0	0	1	1	1	1	1	1	1	1	1	1	1	1	1	1	1	1	1	1	1	1	1	1	1
217		H4-18-0008-1	15 (CC15)	survived	no MRSA	1	0	0	0	0	0	0	0	0	0	0	1	0	0	0	1	0	1	0	0	0	1	1	1	1	1	1	1	1	1	1	1	1	1	1	1	1	1	1	1	1	1	1	1
218		H4-17-0091-1	15 (CC15)	died	no MRSA	0	0	0	1	0	0	0	0	0	0	0	1	0	0	0	1	1	1	1	0	1	1	1	1	1	1	1	1	1	1	1	1	1	1	1	1	1	1	1	1	1	1	0	1
219		H4-17-0396-1	15 (CC15)	survived	no MRSA	0	0	0	0	0	0	0	0	0	0	0	1	0	0	0	0	0	1	1	0	0	1	0	1	1	1	1	1	0	1	1	1	1	1	1	0	1	1	1	1	1	1	1	1
220		H3-17-0327-1	-	survived	no MRSA	0	0	0	0	0	0	0	0	0	0	0	0	0	0	0	0	0	1	1	0	0	1	1	1	1	0	1	1	1	1	1	1	1	1	1	1	1	1	1	1	1	1	1	1
221		H3-17-0206-1	15 (CC15)	survived	no MRSA	0	0	0	0	0	0	0	0	0	0	0	0	0	0	0	0	0	1	1	0	0	1	1	1	1	1	1	1	1	1	1	1	1	1	1	1	1	1	1	1	1	1	1	1
222		H2-17-0430-1	15 (CC15)	died	no MRSA	0	0	0	0	0	0	0	0	0	0	0	1	0	0	0	0	0	1	1	0	0	1	1	1	1	1	1	1	1	1	1	1	1	1	1	1	1	1	1	1	1	1	1	1
223		H2-20-0444-1	15 (CC15)	survived	no MRSA	0	0	0	0	0	0	0	0	0	0	0	1	0	0	0	1	1	1	1	0	0	1	1	1	1	1	1	1	1	1	1	1	1	1	1	1	1	1	1	1	1	1	1	1
224		H2-20-0150-1	15 (CC15)	survived	no MRSA	0	0	0	0	0	0	0	0	0	0	0	0	0	0	0	0	0	1	1	0	0	1	1	1	1	1	1	1	1	1	1	1	1	1	1	1	1	1	1	1	1	1	1	1
225		H5-17-0290-1	15 (CC15)	survived	no MRSA	0	0	0	0	0	0	0	0	0	0	0	0	0	0	0	0	0	1	1	0	0	1	1	1	1	1	1	1	1	1	1	1	1	1	1	1	1	0	1	1	1	1	1	1
226		H1-17-0487-1	15 (CC15)	survived	no MRSA	0	0	0	0	0	0	0	0	0	0	0	0	0	0	0	0	0	1	1	0	0	1	1	1	1	1	1	1	1	1	1	1	1	1	1	1	1	1	1	1	1	1	1	1
227		H2-18-0640-1	15 (CC15)	survived	no MRSA	0	0	0	0	0	0	0	0	0	0	0	0	0	0	0	0	0	1	1	0	0	1	1	1	1	1	1	1	1	1	1	1	1	1	0	1	1	1	1	1	1	1	1	1
228		H2-19-0017-1	15 (CC15)	died	no MRSA	0	0	0	0	0	0	0	0	0	0	0	0	0	0	0	1	0	1	1	0	0	1	1	1	1	1	1	1	1	1	1	1	1	1	1	1	1	1	1	1	1	1	1	1
229		H5-19-0336-1	15 (CC15)	survived	no MRSA	0	0	0	0	0	0	0	0	0	0	0	0	0	0	0	0	0	1	1	0	0	1	1	1	1	1	1	1	1	1	1	1	1	1	1	1	1	1	1	1	1	1	1	1
230		H2-17-0536-1	15 (CC15)	died	no MRSA	0	0	0	0	0	0	0	0	0	0	0	1	1	0	0	0	0	1	1	0	1	1	1	1	1	1	1	1	1	1	1	1	1	1	1	1	1	1	1	1	1	1	1	1
231		H1-17-0402-1	15 (CC15)	died	no MRSA	0	0	0	0	0	0	0	0	0	0	0	0	0	0	0	0	0	1	1	0	0	1	1	1	1	1	1	1	1	1	1	1	1	1	1	1	1	1	1	1	1	1	1	1
232		H4-18-0106-1	15 (CC15)	survived	no MRSA	1	0	0	1	0	0	0	0	0	0	0	0	0	0	0	1	0	1	0	0	0	1	1	1	1	1	1	1	1	1	1	1	1	1	1	1	1	1	0	1	1	1	1	1
233		H2-17-0566-1	15 (CC15)	died	no MRSA	1	0	0	0	0	0	0	0	0	0	0	0	0	0	0	1	1	1	1	0	0	1	1	1	1	1	1	1	1	1	1	1	1	1	1	1	1	1	1	1	1	1	1	1
234		H2-17-0314-1	15 (CC15)	survived	no MRSA	0	0	0	0	0	0	0	0	0	0	0	0	0	0	0	0	0	1	1	0	0	1	1	1	1	1	1	1	1	1	1	1	1	1	1	1	1	1	1	1	1	1	1	1
235		H4-18-0301-1	15 (CC15)	survived	no MRSA	1	0	0	0	0	0	0	0	0	0	0	0	0	0	0	0	1	1	1	0	0	1	1	1	1	1	1	1	1	1	1	1	0	1	1	1	1	1	1	1	1	1	1	1
236		H2-20-0293-1	15 (CC15)	died	no MRSA	0	0	0	0	0	0	0	0	0	0	0	0	0	0	0	0	0	1	1	0	0	1	1	1	1	1	1	1	1	1	1	1	1	1	1	1	1	1	1	1	1	1	1	1
237		H5-18-0104-1	15 (CC15)	survived	no MRSA	0	0	0	0	0	0	0	0	0	0	0	0	0	0	0	0	0	1	1	0	0	1	1	0	1	1	1	1	1	1	1	1	1	1	1	1	0	1	1	1	1	1	1	1
238		H4-18-0214-1	15 (CC15)	survived	no MRSA	1	0	0	0	0	0	0	0	0	0	0	0	0	0	0	0	1	1	1	0	0	0	1	1	1	1	1	1	1	1	1	1	0	1	1	1	1	1	1	1	1	1	1	1
239		H1-18-0346-1	15 (CC15)	survived	no MRSA	1	0	0	0	0	0	0	0	0	0	0	0	0	0	0	0	0	1	1	0	0	1	1	1	1	1	1	1	1	1	1	1	1	1	1	1	1	1	1	1	1	1	1	1
240		H4-17-0403-1	15 (CC15)	survived	no MRSA	0	0	0	0	0	0	0	0	0	0	0	0	0	0	0	0	0	1	1	0	0	1	1	1	0	1	1	1	1	1	1	1	1	1	1	1	1	1	1	1	1	1	1	1
241		H2-18-0270-1	15 (CC15)	survived	no MRSA	0	0	0	0	0	0	0	0	0	0	0	0	0	0	0	1	1	0	1	0	1	1	1	1	1	1	1	1	1	1	1	1	1	1	0	1	1	1	1	1	1	1	0	1
242		H5-17-0104-1	9	survived	no MRSA	0	0	0	0	0	0	0	0	0	0	1	0	1	0	0	0	0	0	1	0	1	0	1	0	1	1	1	1	1	0	1	1	0	1	1	0	1	1	1	1	0	1	1	1
243		H2-17-0656-1	9	died	no MRSA	0	0	0	0	0	0	0	0	0	0	1	0	0	0	0	0	0	0	1	0	1	0	1	0	1	1	1	1	1	0	1	1	0	1	1	0	1	1	1	1	0	1	1	1
244		H5-17-0276-1	9	died	no MRSA	0	0	0	0	0	0	0	0	0	0	1	0	0	0	0	0	0	0	1	0	0	0	1	1	1	1	1	1	1	0	1	1	0	1	1	0	1	1	1	1	0	1	1	1
245		H5-20-0175-1	109	survived	no MRSA	1	0	0	0	0	0	0	0	0	0	0	0	0	0	0	1	0	0	1	0	0	0	1	1	1	1	1	1	1	0	1	0	0	1	0	0	1	1	0	1	0	1	1	1
246		H2-20-0104-1	109	survived	no MRSA	0	0	0	0	0	0	0	0	0	0	0	0	0	0	0	0	0	0	1	0	0	0	1	1	1	0	1	1	1	0	1	0	0	1	0	0	1	0	0	1	0	1	1	1
247		H4-18-0271-1	464	survived	no MRSA	0	0	0	0	0	0	0	0	0	0	0	0	0	0	1	0	0	1	0	0	0	1	1	1	1	0	1	1	1	1	1	1	1	1	1	0	1	1	1	1	1	1	1	1
248		H1-17-0271-1	97 (CC97)	survived	no MRSA	0	0	0	0	0	0	0	0	0	1	1	0	0	0	1	0	0	1	0	0	0	1	0	1	1	1	1	1	1	1	1	1	1	1	1	1	1	1	1	1	1	1	1	1
249		H2-18-0164-1	97 (CC97)	died	no MRSA	0	0	0	0	0	0	0	0	0	1	1	0	1	0	1	0	0	1	1	0	1	1	0	1	1	1	1	1	1	1	1	1	1	1	1	1	1	1	1	1	1	1	1	1
250		H1-18-0399-1	97 (CC97)	survived	no MRSA	0	0	0	0	0	0	0	0	0	1	1	0	0	0	1	0	0	1	1	1	0	1	0	1	1	1	1	1	1	1	1	1	1	1	1	1	1	1	1	1	1	1	1	1
251		H1-18-0415-1	97 (CC97)	survived	no MRSA	0	0	0	0	0	0	0	0	0	1	1	0	0	0	1	0	0	1	1	1	0	1	1	1	1	1	1	1	1	1	1	1	1	1	1	1	1	1	1	1	1	1	1	1
252		H4-18-0383-1	97 (CC97)	survived	no MRSA	0	0	0	0	0	0	0	0	0	1	1	0	0	0	1	0	0	1	1	0	0	1	1	1	1	1	1	1	1	1	1	1	1	1	1	1	1	1	1	1	1	1	1	1
253		H4-18-0295-1	97 (CC97)	died	no MRSA	0	0	0	0	0	0	0	0	1	1	1	0	0	0	1	0	0	1	1	0	0	1	1	1	1	1	1	1	1	1	1	1	1	1	1	1	1	1	1	1	1	1	1	1
254		H2-20-0431-1	97 (CC97)	survived	no MRSA	0	0	0	0	0	0	0	0	0	1	1	0	0	0	1	0	0	1	1	0	0	1	1	1	1	0	1	1	1	1	1	1	1	1	1	1	1	1	1	1	1	1	1	1
255		H2-17-0515-1	97 (CC97)	survived	no MRSA	0	0	0	0	0	0	0	0	0	1	1	0	0	0	1	0	0	1	1	0	0	1	1	1	1	1	1	1	1	1	1	1	1	1	1	1	1	1	1	1	1	1	1	1
256		H2-17-0469-1	97 (CC97)	survived	no MRSA	0	0	0	0	0	0	0	0	0	0	1	0	0	0	1	0	0	1	1	1	0	1	1	1	1	1	1	1	1	1	1	1	1	1	1	1	1	1	1	1	1	1	1	1
257		H4-17-0077-1	97 (CC97)	survived	no MRSA	0	0	0	0	0	0	0	0	0	1	0	0	0	0	1	0	0	1	1	0	0	1	1	1	1	1	1	1	1	1	1	1	1	1	1	1	1	1	1	1	1	1	1	1
258		H2-18-0183-1	97 (CC97)	died	no MRSA	0	0	0	0	0	0	0	0	0	1	0	0	0	0	1	0	0	1	1	1	0	1	1	1	1	1	1	1	1	1	1	1	1	1	1	1	1	1	1	1	1	1	1	1
259		H2-18-0331-1	97 (CC97)	survived	no MRSA	0	0	0	0	0	0	0	0	0	1	1	0	0	0	1	0	0	1	1	1	0	0	1	1	1	1	1	1	1	1	1	1	1	1	1	0	1	1	1	1	1	1	1	1
260		H2-17-0221-1	97 (CC97)	died	no MRSA	0	0	0	0	0	0	0	0	0	1	1	0	0	0	1	0	0	1	1	0	0	1	1	1	1	1	1	1	1	1	1	1	1	1	1	0	1	1	1	1	1	1	1	1
261		H2-18-0454-1	88	died	no MRSA	0	0	0	0	0	0	0	0	1	0	0	0	0	0	1	0	0	0	1	0	0	1	1	0	0	1	1	1	1	1	1	1	1	1	1	0	0	1	0	1	1	1	1	1
262		H5-20-0404-1	779	survived	no MRSA	0	0	0	0	0	0	0	0	0	0	0	0	0	0	0	0	0	0	0	0	0	0	1	1	1	1	1	0	0	0	0	0	0	0	0	0	1	1	0	1	0	0	1	1
263		H2-20-0281-1	779	survived	no MRSA	0	0	0	0	0	0	0	0	0	0	0	0	0	0	0	0	0	0	0	0	0	0	1	1	1	1	1	0	0	0	0	0	0	0	0	0	1	1	0	1	0	0	1	1
264		H2-18-0511-1	-	survived	MRSA	0	0	0	0	0	0	0	0	0	0	1	0	0	0	0	1	0	0	0	1	0	0	0	1	1	1	0	1	1	0	1	1	1	1	0	1	0	1	0	1	0	0	1	1
265		H4-17-0081-1	5 (CC5)	survived	no MRSA	0	0	0	0	0	0	0	0	0	0	0	0	0	0	1	0	0	0	0	0	0	1	1	1	1	1	1	1	1	1	1	1	1	1	1	0	1	0	0	1	1	1	1	1
266		H2-18-0567-1	5 (CC5)	survived	no MRSA	0	0	0	0	0	0	0	0	0	0	0	0	0	0	1	0	0	0	0	0	0	1	1	1	1	1	1	1	0	1	1	1	1	1	1	0	1	1	0	1	1	1	1	1
267		H5-20-0310-1	5 (CC5)	died	no MRSA	0	1	0	0	1	1	1	1	0	0	0	0	1	1	1	0	0	0	0	1	1	1	1	1	1	1	1	1	1	1	1	1	1	1	0	1	1	1	0	1	1	1	1	1
268		H4-17-0282-1	-	survived	no MRSA	0	0	0	0	0	0	0	0	0	0	0	0	1	0	1	0	0	0	0	0	1	1	1	1	1	1	1	1	1	1	1	1	1	1	1	1	1	1	0	1	1	1	1	1
269		H5-18-0333-1	950	died	no MRSA	0	0	0	0	0	0	0	0	1	0	0	0	0	0	1	0	0	0	0	1	0	1	1	1	1	1	1	1	1	1	1	1	1	1	1	1	1	1	0	1	1	1	1	1
270		H2-18-0403-1	5 (CC5)	survived	no MRSA	0	1	0	0	1	1	1	1	0	0	0	0	1	1	0	0	0	0	0	1	1	1	1	1	1	1	1	1	1	1	1	1	1	1	1	1	1	1	0	1	1	1	1	1
271		H2-20-0611-1	-	survived	no MRSA	0	0	0	0	0	0	0	0	0	0	0	0	0	0	1	0	0	0	0	0	0	1	1	1	1	1	1	1	1	1	1	1	1	1	1	1	1	0	0	1	1	1	1	1
272		H4-17-0443-1	5 (CC5)	survived	no MRSA	0	0	0	0	0	0	0	0	0	0	0	0	0	0	1	0	0	0	0	0	0	1	1	1	1	1	1	1	1	1	1	1	1	1	1	1	1	1	0	1	1	1	1	1
273		H2-18-0385-1	5 (CC5)	survived	no MRSA	0	0	0	0	0	0	0	0	0	0	0	0	0	0	1	0	0	0	0	0	0	1	1	1	1	1	1	1	1	1	1	1	1	1	1	1	1	1	0	1	1	1	1	1
274		H2-18-0255-1	5 (CC5)	survived	MRSA	1	1	1	0	1	1	1	1	0	0	0	0	0	1	1	0	0	0	0	1	0	1	1	1	1	1	1	1	1	1	1	1	1	1	0	1	1	1	0	1	1	1	1	1
275		H2-18-0661-1	225	survived	MRSA	0	1	1	0	1	1	1	1	0	0	0	0	1	1	1	0	0	0	0	1	1	1	1	1	1	1	1	1	1	1	1	1	0	1	1	1	1	1	0	1	1	1	1	1
276		H5-20-0299-1	225	survived	MRSA	0	1	1	0	1	1	1	1	1	0	0	0	0	1	1	1	1	0	0	1	0	1	1	1	1	1	1	1	1	1	1	1	1	1	1	1	1	1	0	1	1	1	1	1
277		H2-20-0337-1	225	died	MRSA	0	1	1	0	1	1	1	1	1	0	0	0	0	1	1	0	0	0	0	1	0	1	1	1	1	1	1	1	1	1	1	1	1	1	1	1	1	1	0	1	1	1	1	1
278		H4-17-0341-1	225	died	MRSA	0	1	1	0	1	1	1	1	1	0	0	0	0	1	1	0	0	0	0	1	0	1	1	1	1	1	1	1	1	1	1	1	1	1	1	1	1	1	0	1	1	1	1	1
279		H4-17-0314-1	225	survived	MRSA	0	1	1	0	1	1	1	1	0	0	0	0	0	1	1	0	0	0	0	1	0	1	1	1	1	1	1	1	1	1	1	1	1	1	1	0	1	1	0	1	1	1	0	1
280		H4-18-0150-1	225	survived	MRSA	0	1	1	0	1	0	1	1	1	0	0	0	0	1	0	0	0	0	0	1	0	1	1	1	1	1	1	1	0	1	1	1	1	1	1	1	1	1	0	1	1	1	1	1
281		H4-18-0450-1	225	survived	no MRSA	0	1	0	0	1	1	1	1	1	0	0	0	0	1	1	0	0	0	0	1	0	1	1	1	1	1	1	1	1	1	1	1	1	1	1	1	1	1	0	1	1	1	1	1
282		H4-18-0256-1	225	died	MRSA	0	1	1	0	1	1	1	1	1	0	0	0	0	1	1	0	0	0	0	1	0	1	1	1	1	1	1	1	1	1	1	1	1	1	1	1	1	1	0	1	1	1	1	1
283		H2-20-0564-1	-	survived	no MRSA	0	0	0	0	0	0	0	0	0	0	0	0	0	0	1	0	0	0	0	0	0	1	1	1	1	1	1	1	1	1	0	1	1	1	1	1	1	1	0	1	1	1	1	1
284		H5-20-0011-1	5 (CC5)	survived	no MRSA	0	0	0	0	0	0	0	0	0	0	0	0	0	0	1	0	0	0	0	0	0	1	1	1	1	1	1	1	1	1	1	1	1	1	1	1	1	1	0	1	1	1	0	1
285		H4-18-0161-1	5 (CC5)	survived	no MRSA	0	1	0	0	1	1	1	1	0	0	0	0	0	1	1	0	0	0	0	1	0	1	1	1	1	1	1	1	1	1	1	1	1	1	1	1	1	1	0	1	1	1	1	1
286		H5-18-0266-1	5 (CC5)	survived	no MRSA	0	0	0	0	0	0	0	0	0	0	0	0	0	0	1	0	0	0	0	0	0	1	1	0	1	1	1	1	1	1	1	1	0	1	1	1	1	1	0	1	1	1	1	1
287		H3-17-0353-1	5 (CC5)	survived	no MRSA	0	0	0	0	0	0	0	0	0	0	0	0	0	0	1	0	0	0	0	0	0	1	1	1	1	1	1	1	1	1	1	1	1	1	1	1	1	1	0	1	1	1	1	0
288		H5-17-0282-1	5 (CC5)	died	no MRSA	0	1	0	0	1	1	1	1	0	0	0	0	1	1	1	0	0	0	0	1	1	1	1	1	1	1	1	1	1	1	1	1	1	1	1	1	1	1	0	1	1	1	1	1
289		H4-18-0306-1	-	survived	no MRSA	0	0	0	0	0	0	0	0	0	0	0	0	0	0	0	0	0	0	0	0	0	0	1	1	1	1	1	1	1	1	1	1	0	1	1	1	1	1	0	1	1	1	1	1
290		H2-17-0471-1	5 (CC5)	died	no MRSA	0	1	0	0	1	1	1	1	0	0	0	0	0	1	1	0	0	0	0	1	0	1	1	0	1	1	1	1	1	1	1	1	1	1	0	1	1	1	0	1	1	1	1	1
291		H5-19-0341-1	5 (CC5)	survived	no MRSA	0	1	0	0	1	1	1	1	0	0	0	0	0	1	1	0	0	0	0	1	0	1	1	1	1	1	1	1	1	1	1	1	1	1	1	1	1	1	0	1	1	1	1	1
292		H2-17-0641-1	5 (CC5)	died	no MRSA	0	1	0	0	1	1	1	1	0	0	0	0	0	1	1	0	0	0	0	1	0	1	1	1	1	1	1	1	1	1	1	1	1	1	1	1	1	1	0	1	1	1	1	1
293		H2-20-0474-1	5 (CC5)	died	no MRSA	0	0	0	0	0	0	0	0	0	0	0	0	0	0	1	0	0	0	0	0	0	1	1	1	1	1	1	1	1	1	1	1	1	1	1	1	1	1	0	1	1	1	1	1
294		H2-18-0229-1	5 (CC5)	survived	no MRSA	0	1	0	0	0	1	1	1	0	0	0	0	0	1	1	0	0	0	0	1	0	1	1	1	1	1	1	1	1	1	1	1	1	1	1	1	1	1	0	1	1	1	1	1
295		H2-20-0609-1	5 (CC5)	survived	no MRSA	0	0	0	0	0	0	0	0	0	0	0	0	0	0	0	0	1	0	0	1	0	1	1	1	1	1	1	1	1	1	1	1	1	1	0	1	1	1	0	1	1	1	1	1
296		H2-20-0660-1	5 (CC5)	died	no MRSA	0	0	0	0	1	1	1	1	1	0	0	0	0	1	1	0	0	0	0	1	0	1	1	1	1	1	1	1	1	1	1	1	1	1	1	1	1	1	0	1	1	1	1	1
297		H2-20-0149-1	5 (CC5)	died	no MRSA	0	0	0	0	0	0	0	0	0	0	0	0	1	0	1	0	0	0	0	0	1	1	1	1	1	1	1	1	1	1	1	1	1	1	1	1	1	1	0	1	1	1	1	1
298		H4-18-0006-1	5 (CC5)	survived	no MRSA	0	0	0	0	0	0	0	0	0	0	0	0	0	0	0	0	0	0	0	0	0	1	1	1	1	1	1	1	1	1	1	1	1	1	1	1	1	1	0	1	1	1	1	1
299		H2-19-0010-1	5 (CC5)	survived	no MRSA	0	0	0	1	0	0	0	0	0	0	0	0	0	0	1	0	0	0	0	0	0	1	1	1	1	1	1	1	1	1	1	1	1	1	1	1	1	1	0	1	1	1	1	1
300		H2-17-0504-1	5 (CC5)	survived	no MRSA	0	0	0	1	0	0	0	0	0	0	0	0	0	0	1	0	0	0	0	0	0	1	1	1	1	1	1	1	1	1	1	1	1	1	1	1	1	1	0	1	1	1	1	1
301		H4-17-0270-1	146	survived	no MRSA	0	0	0	0	0	0	0	0	0	0	0	0	0	0	1	0	0	0	0	0	0	1	1	1	1	1	1	1	1	1	1	0	1	1	1	1	1	1	0	1	1	1	1	1
302		H2-18-0555-1	146	died	no MRSA	0	0	0	0	0	0	0	0	0	0	0	0	1	0	1	0	0	0	0	0	1	1	1	1	1	1	1	1	1	1	1	1	1	1	1	1	1	1	0	1	1	1	1	1
303		H2-20-0077-1	5 (CC5)	survived	no MRSA	0	0	0	0	0	0	0	0	0	0	0	0	0	0	1	0	0	0	0	1	0	1	1	1	1	1	1	1	1	1	1	1	1	1	0	1	1	1	0	1	1	1	1	1
304		H2-20-0252-1	5 (CC5)	survived	no MRSA	0	0	0	0	0	0	0	0	0	0	0	0	1	0	1	0	0	0	0	0	1	1	1	1	1	1	1	1	1	1	1	0	1	1	0	1	1	1	0	1	1	1	1	0
305		H2-20-0114-1	5 (CC5)	died	no MRSA	0	0	0	0	0	0	0	0	0	0	0	0	0	0	1	0	0	0	0	0	0	1	1	1	1	1	1	1	1	1	1	1	1	1	0	1	1	1	0	1	1	1	1	1
306		H2-17-0610-1	5 (CC5)	survived	no MRSA	0	0	0	0	0	0	0	0	0	0	0	0	0	0	1	0	0	0	0	1	1	1	1	1	1	1	1	1	1	1	1	1	1	1	0	1	1	1	0	1	1	1	1	1
307		H2-18-0508-1	5 (CC5)	survived	no MRSA	0	0	0	0	0	0	0	0	0	0	0	0	0	0	1	0	0	0	0	0	0	1	1	1	1	1	1	1	1	1	1	1	1	1	0	1	1	1	0	1	1	1	1	1
308		H5-18-0223-1	5 (CC5)	survived	no MRSA	0	0	0	0	0	0	0	0	0	0	0	0	0	0	1	0	0	0	0	0	0	1	1	1	1	1	1	1	1	1	1	1	1	1	0	1	0	1	0	1	1	1	1	1
309		H4-18-0319-1	5 (CC5)	survived	no MRSA	0	0	0	0	0	0	0	0	0	0	0	0	1	0	1	0	0	0	0	0	1	1	1	1	1	1	1	1	1	1	1	1	1	1	0	1	1	1	0	1	1	1	1	1
310		H2-20-0375-1	5 (CC5)	died	no MRSA	0	0	0	0	0	0	0	0	0	0	0	0	0	0	1	0	0	0	0	1	0	1	1	1	1	1	1	1	1	1	1	1	1	1	0	1	1	1	0	1	1	1	1	1
311		H2-20-0045-1	5 (CC5)	died	no MRSA	0	0	0	0	0	0	0	0	0	0	0	0	0	0	1	0	0	0	0	0	0	1	1	1	1	1	1	1	1	1	1	1	1	1	0	1	1	1	0	1	1	1	1	1
312		H4-18-0247-1	5 (CC5)	survived	no MRSA	0	0	0	0	0	0	0	0	0	0	0	0	0	0	1	0	1	0	0	0	0	1	1	1	1	1	1	1	1	1	1	1	1	1	0	1	1	1	0	1	1	1	1	1
313		H2-20-0455-1	5 (CC5)	survived	no MRSA	0	0	0	0	0	0	0	0	0	0	0	0	0	0	1	1	1	0	0	0	0	1	1	1	1	1	1	1	1	1	1	1	1	1	0	1	1	1	0	1	1	1	1	1
314		H2-18-0038-1	5 (CC5)	survived	no MRSA	0	0	0	0	0	0	0	0	0	0	0	0	0	0	1	1	1	0	0	1	0	1	1	1	1	1	1	1	1	1	1	1	1	1	0	1	1	1	0	1	1	1	1	1
315		H5-18-0229-1	5 (CC5)	survived	no MRSA	0	0	0	0	0	0	0	0	0	0	0	0	0	0	1	1	0	0	0	1	0	1	1	1	1	1	1	1	1	1	1	1	1	1	0	1	1	1	0	1	1	1	1	1
316		H4-17-0326-1	5 (CC5)	survived	no MRSA	0	0	0	0	0	0	0	0	0	0	0	0	1	0	1	0	0	0	0	1	1	1	1	1	1	1	1	1	1	1	1	1	1	1	0	1	1	1	0	1	1	1	1	1
317		H4-17-0279-1	5 (CC5)	survived	no MRSA	0	0	0	0	0	0	0	0	0	0	0	0	1	0	1	0	0	0	0	1	1	1	1	1	1	1	1	1	1	1	1	1	1	1	0	1	1	1	0	1	1	1	1	1
318		H4-17-0183-1	5 (CC5)	died	no MRSA	0	0	0	0	0	0	0	0	1	0	0	0	1	0	1	0	0	0	0	1	1	1	1	1	1	1	1	1	1	1	1	1	1	1	0	1	1	1	0	1	1	1	1	1
319		H1-17-0406-1	5 (CC5)	survived	no MRSA	0	0	0	0	0	0	0	0	0	0	0	0	1	0	1	0	0	0	0	1	1	1	1	1	1	1	1	1	1	1	1	1	1	1	0	1	1	0	0	1	1	1	1	1
320		H2-20-0346-1	5 (CC5)	survived	no MRSA	0	0	0	0	0	0	0	0	0	0	0	0	0	0	1	0	0	0	0	0	0	1	1	1	1	1	1	1	1	1	1	1	1	0	0	1	1	1	0	1	1	1	1	1
321		H2-20-0343-1	5 (CC5)	survived	no MRSA	0	0	0	0	0	0	0	0	0	0	0	0	0	0	1	0	0	0	0	0	0	1	1	1	1	1	1	1	1	1	1	1	1	0	0	1	1	1	0	1	1	1	1	1
322		H2-18-0145-1	-	died	no MRSA	0	0	0	0	0	0	0	0	0	0	0	0	1	0	0	0	0	0	0	0	1	0	0	0	0	0	1	0	0	0	0	0	1	1	0	1	0	0	0	1	0	1	0	1
323		H1-17-0501-1	101	survived	no MRSA	0	0	0	0	0	0	0	0	0	0	0	0	0	0	0	0	0	0	0	0	0	0	0	0	0	0	1	0	0	0	0	0	1	1	0	1	0	0	0	1	0	1	0	1
324		H2-18-0150-1	-	survived	no MRSA	0	0	0	0	0	0	0	0	0	0	0	0	1	0	0	1	1	0	0	0	1	0	0	0	0	0	1	0	0	0	0	0	1	1	0	1	0	0	0	1	0	1	0	1
325		H4-17-0381-1	101	died	no MRSA	0	0	0	0	0	0	0	0	0	0	0	0	0	0	0	0	0	0	0	0	0	0	0	0	0	0	1	0	0	0	0	0	1	1	0	1	0	0	0	1	0	1	0	0
326		H2-20-0601-1	101	survived	no MRSA	0	0	0	0	0	0	0	0	0	0	0	0	0	0	0	1	0	0	0	0	0	0	0	0	0	0	1	0	0	0	0	0	1	1	0	1	0	0	0	1	0	1	0	1
327		H5-17-0030-1	101	survived	no MRSA	0	0	0	0	0	0	0	0	0	0	0	0	0	0	0	0	0	0	0	0	0	0	0	0	0	0	1	0	0	0	0	0	1	1	0	1	0	0	0	1	0	1	0	1
328		H2-20-0573-1	101	survived	no MRSA	0	0	0	0	0	0	0	0	0	0	0	0	0	0	0	0	0	0	0	0	0	0	0	0	0	0	1	0	0	0	0	0	1	1	0	1	0	0	0	1	0	1	0	1
329		H5-17-0146-1	101	survived	no MRSA	0	0	0	0	0	0	0	0	0	0	0	0	0	0	0	1	0	0	0	0	0	0	0	0	0	0	1	0	0	0	0	0	1	1	0	0	0	0	0	0	0	1	0	1
330		H4-18-0196-1	101	survived	no MRSA	0	0	0	1	0	0	0	0	0	0	0	0	0	0	0	1	1	0	0	0	0	0	0	0	0	0	1	0	0	0	0	0	1	1	0	1	0	0	0	1	0	1	0	1
331		H2-20-0432-1	101	survived	no MRSA	0	0	0	0	0	0	0	0	0	0	0	0	0	0	0	0	0	0	0	0	0	0	0	0	0	0	1	0	0	0	0	0	1	1	0	0	0	0	0	1	0	1	0	1
332		H2-20-0361-1	101	survived	no MRSA	0	0	0	0	0	0	0	0	0	0	0	0	0	0	0	0	0	0	0	0	0	0	0	0	0	0	1	0	0	0	0	0	1	1	0	1	0	0	0	1	0	1	0	1
333		H4-17-0252-1	101	survived	no MRSA	0	0	0	0	0	0	0	0	0	0	0	0	0	0	0	1	0	0	0	0	0	0	0	0	0	0	1	0	0	0	0	0	0	1	0	1	0	0	0	1	0	1	0	1
334		H2-20-0182-1	101	died	no MRSA	0	0	0	0	0	0	0	0	0	0	0	0	0	0	0	0	0	0	0	0	0	0	0	0	0	0	1	0	0	0	0	0	1	1	0	1	0	0	0	1	0	1	0	1
335		H4-18-0463-1	207	survived	no MRSA	0	0	0	0	0	0	0	0	0	0	0	0	0	0	0	0	0	0	1	0	0	0	0	0	0	0	1	0	0	0	0	0	0	0	0	0	0	1	0	0	1	0	0	1
336		H2-19-0048-1	509	died	no MRSA	0	0	1	0	0	0	0	0	1	0	0	0	0	0	0	0	0	0	1	0	0	0	0	0	0	0	1	0	0	0	0	0	0	0	0	0	0	1	0	0	1	1	0	1
337		H4-18-0328-1	22 (CC22)	survived	no MRSA	0	0	0	0	0	0	0	0	0	0	0	0	0	0	0	0	0	0	0	0	0	0	0	0	0	0	0	0	0	0	0	0	0	0	0	0	1	0	0	0	0	1	0	1
338		H5-17-0116-1	22 (CC22)	died	no MRSA	0	0	0	0	0	0	0	0	0	0	0	0	0	0	0	0	0	0	0	0	0	0	0	0	0	0	0	0	0	0	0	0	0	0	0	0	1	0	1	0	0	1	0	1
339		H4-17-0229-1	22 (CC22)	survived	no MRSA	0	0	0	0	0	0	0	0	0	0	0	0	0	0	0	0	0	0	0	0	0	0	0	0	0	0	0	0	0	0	0	0	0	0	0	0	1	0	1	0	0	1	0	1
340		H4-18-0183-1	22 (CC22)	survived	no MRSA	0	0	0	0	0	0	0	0	0	0	0	0	0	0	0	0	0	0	0	0	0	0	0	0	0	0	0	0	0	0	0	0	0	0	0	0	1	0	1	0	0	1	0	1
341		H2-18-0734-1	22 (CC22)	survived	no MRSA	0	0	0	0	0	0	0	0	0	0	0	0	0	0	0	0	0	0	0	0	0	0	0	0	0	0	0	0	0	0	0	0	0	0	0	0	1	0	1	0	0	1	0	1
342		H5-20-0138-1	22 (CC22)	survived	no MRSA	0	0	0	0	0	0	0	0	0	0	0	0	0	0	0	0	0	0	0	0	0	0	0	0	0	0	0	0	0	0	0	0	0	0	0	0	1	0	1	0	0	1	0	1
343		H2-18-0506-1	22 (CC22)	survived	no MRSA	0	0	0	0	0	0	0	0	0	0	0	0	0	0	0	0	0	0	0	0	0	0	0	0	0	0	0	0	0	0	0	0	0	0	0	0	1	0	1	0	0	1	0	1
344		H2-18-0420-1	22 (CC22)	survived	no MRSA	0	0	0	0	0	0	0	0	0	0	0	0	1	0	0	0	0	0	0	0	1	0	0	0	0	0	0	0	0	0	0	0	0	0	0	0	1	0	1	0	0	1	0	1
345		H4-18-0033-1	22 (CC22)	survived	no MRSA	0	0	0	0	0	0	0	0	0	0	0	0	0	0	0	0	0	0	0	0	0	0	0	0	0	0	0	0	0	0	0	0	0	0	0	0	1	0	1	0	0	1	0	1
346		H4-18-0285-1	22 (CC22)	survived	no MRSA	0	0	0	0	0	0	0	0	0	0	0	0	0	0	0	0	0	0	0	0	0	0	0	0	0	0	0	0	0	0	0	0	0	0	0	0	1	0	1	0	0	1	0	1
347		H2-18-0324-1	22 (CC22)	survived	no MRSA	0	0	0	0	0	0	0	0	0	0	0	0	0	0	0	0	0	0	0	0	0	0	0	0	0	0	0	0	0	0	0	0	0	0	0	0	1	0	1	0	0	1	0	1
348		H1-18-0073-1	4155	survived	no MRSA	0	0	0	0	0	0	0	0	0	0	0	0	0	0	0	0	0	0	0	1	0	0	0	0	0	0	0	0	0	0	0	0	0	0	0	0	1	0	0	0	0	1	0	1
349		H2-20-0583-1	22 (CC22)	died	no MRSA	0	0	0	0	0	0	0	0	0	0	0	0	1	0	0	0	0	0	0	0	1	0	0	0	0	0	0	0	0	0	0	0	0	0	0	0	1	0	1	0	0	1	0	1
350		H2-20-0522-1	22 (CC22)	survived	no MRSA	0	0	0	0	0	0	0	0	0	0	0	0	0	0	0	0	0	0	0	0	0	0	0	0	0	0	0	0	0	0	0	0	0	0	0	0	1	0	1	0	0	1	0	1
351		H2-17-0503-1	22 (CC22)	survived	no MRSA	0	0	0	0	0	0	0	0	0	0	0	0	0	0	0	0	0	0	0	0	0	0	0	0	0	0	0	0	0	0	0	0	0	0	0	0	1	0	1	0	0	1	0	1
352		H5-18-0320-1	22 (CC22)	survived	no MRSA	0	0	0	0	0	0	0	0	0	0	0	0	0	0	0	0	0	0	0	0	0	0	0	0	0	0	0	0	0	0	0	0	0	0	0	0	1	0	1	0	0	1	0	1
353		H5-18-0245-1	8388	survived	no MRSA	0	0	0	0	0	0	0	0	0	0	0	0	0	0	0	0	0	0	0	0	0	0	0	0	0	0	0	0	0	0	0	0	0	0	0	0	1	0	1	0	0	1	0	1
354		H2-20-0607-1	22 (CC22)	survived	no MRSA	0	0	0	0	0	0	0	0	0	0	0	0	0	0	0	0	0	0	0	0	0	0	0	0	0	0	0	0	0	0	0	0	0	0	0	0	1	0	1	0	0	1	0	1
355		H2-18-0022-1	22 (CC22)	survived	no MRSA	0	0	0	0	0	0	0	0	0	0	0	0	0	0	0	0	0	0	0	0	0	0	0	0	0	0	0	0	0	0	0	0	0	0	0	0	1	0	1	0	0	1	0	1
356		H5-18-0051-1	22 (CC22)	survived	no MRSA	0	0	0	0	0	0	0	0	0	0	0	0	0	0	0	0	0	0	0	0	0	0	0	0	0	0	0	0	0	0	0	0	0	0	0	0	1	0	1	0	0	1	0	1
357		H4-17-0191-1	22 (CC22)	survived	no MRSA	0	0	0	0	0	0	0	0	0	0	0	0	0	0	0	0	0	0	0	0	0	0	0	0	0	0	0	0	0	0	0	0	0	0	0	0	1	0	1	0	0	1	0	1
358		H2-20-0075-1	22 (CC22)	survived	no MRSA	0	0	0	0	0	0	0	0	0	0	0	0	0	0	0	0	0	0	0	0	0	0	0	0	0	0	0	0	0	0	0	0	0	0	0	0	1	0	1	0	0	1	0	1
359		H2-20-0401-1	22 (CC22)	survived	no MRSA	0	0	0	0	0	0	0	0	0	0	0	0	0	0	0	0	0	0	0	0	0	0	0	0	0	0	0	0	0	0	0	0	0	0	0	0	1	0	0	0	0	1	0	1
360		H2-18-0466-1	22 (CC22)	survived	no MRSA	0	0	0	0	0	0	0	0	0	0	0	0	0	0	0	0	0	0	0	0	0	0	0	0	0	0	0	0	0	0	0	0	0	0	0	0	1	0	1	0	0	1	0	1
361		H4-18-0275-1	22 (CC22)	survived	no MRSA	0	0	0	0	0	0	0	0	0	0	0	0	0	0	0	0	0	0	0	0	0	0	0	0	0	0	0	0	0	0	0	0	0	0	0	0	1	0	1	0	0	1	0	1
362		H3-17-0184-1	22 (CC22)	survived	no MRSA	0	0	0	0	0	0	0	0	0	0	0	0	0	0	0	0	0	0	0	0	0	0	0	0	0	0	0	0	0	0	0	0	0	0	0	0	1	0	1	0	0	1	0	1
363		H4-18-0344-1	-	survived	no MRSA	0	0	0	0	0	0	0	0	0	0	0	0	0	0	0	0	0	0	0	0	0	0	0	0	0	0	0	0	0	0	0	0	0	0	0	0	1	0	1	0	0	1	0	1
364		H4-18-0140-1	737	survived	no MRSA	0	0	0	0	0	0	0	0	0	0	0	0	0	0	0	0	0	0	0	0	0	0	0	0	0	0	0	0	0	0	0	0	0	0	0	0	1	0	1	0	0	1	0	1
365		H4-18-0035-1	737	survived	no MRSA	0	0	0	0	0	0	0	0	0	0	0	0	0	0	0	0	0	0	0	0	0	0	0	0	0	0	0	0	0	0	0	0	0	0	0	0	1	0	1	0	0	1	0	1
366		H2-17-0328-1	-	died	MRSA	0	0	0	1	0	0	0	0	0	0	0	0	0	0	0	1	1	0	0	0	0	0	0	0	0	0	0	0	0	0	0	0	0	0	0	0	1	0	1	0	0	1	0	1
367		H2-20-0345-1	22 (CC22)	survived	no MRSA	0	0	0	1	0	0	0	0	0	0	0	0	0	0	0	1	1	0	0	0	0	0	0	0	0	0	0	0	0	0	0	0	0	0	0	0	1	0	1	0	0	1	0	1
368		H2-18-0418-1	22 (CC22)	survived	MRSA	0	0	0	1	0	0	0	0	0	0	0	0	0	0	0	1	1	0	0	0	0	0	0	0	0	0	0	0	0	0	0	0	0	0	0	0	1	0	1	0	0	1	0	1
369		H1-18-0576-1	22 (CC22)	survived	MRSA	0	0	0	1	0	0	0	0	0	0	0	0	0	0	0	1	1	0	0	0	0	0	0	0	0	0	0	0	0	0	0	0	0	0	0	0	1	0	1	0	0	1	0	1
370		H2-17-0405-1	22 (CC22)	survived	MRSA	0	0	0	1	0	0	0	0	0	0	0	0	0	0	0	1	1	0	0	0	0	0	0	0	0	0	0	0	0	0	0	0	0	0	0	0	1	0	0	0	0	1	0	1
371		H4-18-0441-1	22 (CC22)	died	MRSA	0	0	0	1	0	0	0	0	0	0	0	0	0	0	0	1	1	0	0	0	0	0	0	0	0	0	0	0	0	0	0	0	0	0	0	0	1	0	1	0	0	1	0	1
372		H2-20-0437-1	22 (CC22)	survived	MRSA	0	0	0	1	0	0	0	0	0	0	0	0	0	0	0	1	1	0	0	0	0	0	0	0	0	0	0	0	0	0	0	0	0	0	0	0	1	0	1	0	0	1	0	1
373		H4-17-0224-1	22 (CC22)	survived	MRSA	0	0	0	1	0	0	0	0	0	0	0	0	0	0	0	1	1	0	0	0	0	0	0	0	0	0	0	0	0	0	0	0	0	0	0	0	1	0	1	0	0	1	0	1
374		H4-17-0115-1	22 (CC22)	died	no MRSA	0	0	0	1	0	0	0	0	0	0	0	0	0	0	0	1	1	0	0	0	0	0	0	0	0	0	0	0	0	0	0	0	0	0	0	0	1	0	1	0	0	1	0	1
375		H4-18-0133-1	22 (CC22)	died	MRSA	0	0	0	1	0	0	0	0	0	0	0	0	0	0	0	1	1	0	0	0	0	0	0	0	0	0	0	0	0	0	0	0	0	0	0	0	1	0	1	0	0	1	0	1
376		H2-17-0309-1	22 (CC22)	survived	MRSA	0	0	0	1	0	0	0	0	0	0	0	0	0	0	0	1	1	0	0	0	0	0	0	0	0	0	0	0	0	0	0	0	0	0	0	0	1	0	1	0	0	1	0	1
377		H4-17-0338-1	22 (CC22)	survived	MRSA	0	0	0	1	0	0	0	0	0	0	0	0	0	0	0	1	1	0	0	0	0	0	0	0	0	0	0	0	0	0	0	0	0	0	0	0	1	0	1	0	0	1	0	1
378		H4-17-0096-1	22 (CC22)	survived	MRSA	0	0	0	1	0	0	0	0	0	0	0	0	0	0	0	1	1	0	0	0	0	0	0	0	0	0	0	0	0	0	0	0	0	0	0	0	1	0	1	0	0	1	0	1
379		H5-18-0394-1	22 (CC22)	survived	MRSA	0	0	0	1	0	0	0	0	0	0	0	0	0	0	0	1	1	0	0	0	0	0	0	0	0	0	0	0	0	0	0	0	0	0	0	0	1	0	1	0	0	1	0	1
380		H4-17-0084-1	22 (CC22)	died	MRSA	0	0	0	1	0	0	0	0	0	0	0	0	0	0	0	1	1	0	0	0	0	0	0	0	0	0	0	0	0	0	0	0	0	0	0	0	1	0	1	0	0	1	0	1
381		H2-18-0352-1	22 (CC22)	survived	no MRSA	0	0	0	0	0	0	0	0	0	0	0	0	0	0	0	0	0	0	0	0	0	0	0	0	0	0	0	0	0	0	0	0	0	0	0	0	1	0	1	0	0	1	0	1
382		H4-17-0288-1	22 (CC22)	survived	no MRSA	0	0	0	0	0	0	0	0	1	0	0	0	0	0	0	0	0	0	0	0	0	0	0	0	0	0	0	0	0	0	0	0	0	0	0	0	1	0	1	0	0	1	0	1
383		H2-17-0478-1	22 (CC22)	survived	no MRSA	0	0	0	0	0	0	0	0	0	0	0	0	0	0	0	0	0	0	0	0	0	0	0	0	0	0	0	0	0	0	0	0	0	0	0	0	1	0	1	0	0	1	0	1
384		H4-18-0455-1	22 (CC22)	died	no MRSA	0	0	1	1	0	0	0	0	0	0	0	0	1	0	0	0	1	0	0	0	1	0	0	0	0	0	0	0	0	0	0	0	0	0	0	0	1	0	1	0	0	1	0	1
385		H4-18-0350-1	22 (CC22)	survived	no MRSA	0	0	0	0	0	0	0	0	0	0	0	0	1	0	0	0	0	0	0	0	1	0	0	0	0	0	0	0	0	0	0	0	0	0	0	0	1	0	1	0	0	1	0	1
386		H4-17-0100-1	22 (CC22)	survived	no MRSA	0	0	0	0	0	0	0	0	0	0	0	0	1	0	0	0	0	0	0	0	1	0	0	0	0	0	0	0	0	0	0	0	0	0	0	0	1	0	1	0	0	1	0	1
387		H2-18-0119-1	22 (CC22)	died	MRSA	0	0	0	0	0	0	0	0	0	0	0	0	0	0	0	0	0	0	0	0	0	0	0	0	0	0	0	0	0	0	0	0	0	0	0	0	1	0	1	0	0	1	0	1
388		H4-17-0087-1	22 (CC22)	survived	no MRSA	0	0	1	0	0	0	0	0	0	0	0	0	0	0	0	0	0	0	0	0	0	0	0	0	0	0	0	0	0	0	0	0	0	0	0	0	1	0	1	0	0	1	0	1
389		H2-18-0659-1	22 (CC22)	survived	no MRSA	0	0	1	0	0	0	0	0	0	0	0	0	0	0	0	0	0	0	0	0	0	0	0	0	0	0	0	0	0	0	0	0	0	0	0	0	1	0	1	0	0	1	0	1
390		H2-17-0560-1	-	died	no MRSA	0	0	1	0	0	0	0	0	0	0	0	0	0	0	0	0	0	0	0	0	1	0	0	0	0	0	0	0	0	0	0	0	0	0	0	0	1	0	1	0	0	1	0	1
391		H2-17-0480-1	22 (CC22)	died	no MRSA	0	0	1	0	0	0	0	0	1	0	0	0	0	0	0	0	0	0	0	0	0	0	0	0	0	0	0	0	0	0	0	0	0	0	0	0	1	0	1	0	0	1	0	1
392		H1-18-0032-1	22 (CC22)	died	no MRSA	0	0	1	0	0	0	0	0	0	0	0	0	0	0	0	0	0	0	0	0	0	0	0	0	0	0	0	0	0	0	0	0	0	0	0	0	1	0	1	0	0	1	0	1
393		H1-17-0297-1	22 (CC22)	died	no MRSA	0	0	1	0	0	0	0	0	0	0	0	0	0	0	0	0	0	0	0	0	0	0	0	0	0	0	0	0	0	0	0	0	0	0	0	0	1	0	1	0	0	1	0	1
394		H5-20-0053-1	22 (CC22)	died	no MRSA	0	0	1	0	0	0	0	0	0	0	0	0	0	0	0	0	0	0	0	0	0	0	0	0	0	0	0	0	0	0	0	0	0	0	0	0	0	0	1	0	0	1	0	1
395		H2-18-0639-1	22 (CC22)	died	no MRSA	0	0	1	0	0	0	0	0	1	0	0	0	0	0	0	0	0	0	0	0	0	0	0	0	0	0	0	0	0	0	0	0	0	0	0	0	1	0	1	0	0	1	0	1
396		H5-20-0331-1	22 (CC22)	survived	no MRSA	0	0	0	0	0	0	0	0	0	0	0	0	0	0	0	0	0	0	0	0	0	0	0	0	0	0	0	0	0	0	0	0	0	0	0	0	1	0	1	0	0	1	0	1
397		H3-17-0189-1	22 (CC22)	survived	no MRSA	0	0	1	0	0	0	0	0	0	0	0	0	0	0	0	0	0	0	0	0	0	0	0	0	0	0	0	0	0	0	0	0	0	0	0	0	1	0	1	0	0	1	0	1
398		H4-17-0436-1	22 (CC22)	survived	no MRSA	0	0	1	0	0	0	0	0	0	0	0	0	0	0	0	0	0	0	0	0	0	0	0	0	0	0	0	0	0	0	0	0	0	0	0	0	1	0	1	0	0	1	0	1
399		H4-18-0410-1	22 (CC22)	survived	no MRSA	0	0	0	0	0	0	0	0	0	0	0	0	0	0	0	0	0	0	0	0	0	0	0	0	0	0	0	0	0	0	0	0	0	0	0	0	1	0	1	0	0	1	0	1
400		H4-18-0018-1	22 (CC22)	survived	no MRSA	0	0	0	0	0	0	0	0	0	0	0	0	0	0	0	0	0	0	0	0	0	0	0	0	0	0	0	0	0	0	0	0	0	0	0	0	1	0	1	0	0	1	0	1
401		H5-20-0308-1	22 (CC22)	survived	no MRSA	0	0	0	0	0	0	0	0	0	0	0	0	0	0	0	0	0	0	0	0	0	0	0	0	0	0	0	0	0	0	0	0	0	0	0	0	1	0	1	0	0	1	0	1
402		H5-17-0038-1	22 (CC22)	died	no MRSA	0	0	1	0	0	0	0	0	1	0	0	0	0	0	0	0	0	0	0	0	1	0	0	0	0	0	0	0	0	0	0	0	0	0	0	0	1	0	1	0	0	1	0	1
403		H2-20-0143-1	22 (CC22)	died	no MRSA	0	0	1	0	0	0	0	0	0	0	0	0	0	0	0	0	0	0	0	0	0	0	0	0	0	0	0	0	0	0	0	0	0	0	0	0	1	0	1	0	0	1	0	1
404		H2-18-0112-1	22 (CC22)	survived	no MRSA	0	0	0	0	0	0	0	0	1	0	0	0	0	0	0	0	0	0	0	0	0	0	0	0	0	0	0	0	0	0	0	0	0	0	0	0	1	0	1	0	0	1	0	1
405		H2-17-0286-1	22 (CC22)	survived	no MRSA	0	0	0	0	0	0	0	0	1	0	0	0	0	0	0	0	0	0	0	0	0	0	0	0	0	0	0	0	0	0	0	0	0	0	0	0	1	0	1	0	0	1	0	1
406		H2-18-0441-1	1518	survived	no MRSA	0	0	0	0	0	0	0	0	0	0	0	0	0	0	0	0	1	0	0	0	0	0	0	0	0	0	0	0	0	0	0	0	0	0	0	0	0	0	0	0	0	1	0	0
407		H4-18-0359-1	2361	survived	MRSA	0	0	0	0	0	0	0	0	1	0	0	0	0	0	0	0	0	0	0	0	0	0	0	0	0	1	0	0	0	0	0	0	0	0	0	0	0	0	0	0	0	0	1	0
408		H5-17-0035-1	-	died	no MRSA	1	0	1	0	0	0	0	1	0	0	0	0	0	0	0	1	1	0	0	0	1	0	0	0	0	1	0	0	0	0	0	0	0	0	0	0	0	0	0	0	1	0	1	1
409		H1-18-0096-1	182	survived	no MRSA	0	0	1	0	0	0	0	1	0	0	0	0	0	0	0	0	0	0	0	0	1	0	0	0	0	1	0	0	0	0	0	0	0	0	0	0	0	0	0	0	0	0	1	1
410		H2-18-0599-1	425	survived	no MRSA	0	0	0	0	0	0	0	0	0	0	0	0	0	0	0	0	0	0	0	0	0	0	0	0	0	1	0	0	0	0	0	0	0	0	0	0	0	0	0	0	1	0	0	1
411		H1-18-0055-1	121 (CC121)	survived	no MRSA	1	0	0	1	0	0	0	0	0	0	0	0	0	0	0	1	0	0	0	0	0	0	0	0	0	1	0	0	0	0	0	0	0	0	0	0	0	0	0	0	0	0	0	0
412		H2-20-0470-1	121 (CC121)	died	no MRSA	0	0	0	0	0	0	0	0	0	0	0	0	0	0	0	1	0	0	0	0	1	0	0	0	0	1	0	0	0	0	0	0	0	0	0	0	0	0	0	0	0	0	1	0
413		H2-17-0378-1	718	survived	no MRSA	0	0	0	0	0	0	0	0	1	0	0	0	0	0	0	0	0	0	0	0	0	0	0	0	0	1	0	0	0	0	0	0	0	0	0	0	0	0	0	0	0	1	0	0
414		H4-18-0402-1	-	survived	no MRSA	0	0	0	0	0	0	0	0	0	0	0	0	0	0	0	0	0	0	0	0	0	0	0	0	0	0	0	0	0	0	0	0	0	0	0	0	0	0	0	0	0	0	0	1
415		H4-18-0246-1	-	survived	no MRSA	0	0	0	0	0	0	0	0	0	0	0	0	0	0	0	0	0	0	0	0	0	0	0	0	0	0	0	0	0	0	0	0	0	0	0	0	0	0	0	0	0	0	0	1
416		H2-17-0280-1	59	survived	no MRSA	0	0	0	0	0	0	0	0	0	0	0	0	0	0	0	0	0	0	0	0	0	0	0	0	0	0	0	0	0	0	0	0	0	0	0	0	0	0	0	0	0	0	0	0
417		H4-17-0438-1	59	survived	no MRSA	0	0	0	0	0	0	0	0	0	0	0	0	0	0	0	0	0	0	0	0	0	0	0	0	0	0	0	0	0	0	0	0	0	0	0	0	0	0	0	0	0	0	0	0
418		H2-18-0334-1	59	survived	no MRSA	0	0	0	0	0	0	0	0	0	0	0	0	0	0	0	0	0	0	0	0	0	0	0	0	0	0	0	0	0	0	0	0	0	0	0	0	0	0	0	0	0	0	0	0
419		H2-17-0570-1	59	died	no MRSA	0	0	0	0	0	0	0	0	0	0	0	0	0	0	0	0	0	0	0	1	0	0	0	0	0	0	0	0	0	0	0	0	0	0	0	0	0	0	0	0	0	0	0	0
420		H2-17-0363-1	59	survived	no MRSA	0	0	0	0	0	0	0	0	0	0	0	0	0	0	0	0	0	0	0	1	0	0	0	0	0	0	0	0	0	0	0	0	0	0	0	0	0	0	0	0	0	0	0	0
421		H5-20-0432-1	59	survived	no MRSA	0	0	0	0	0	0	0	0	0	0	0	0	0	0	0	0	0	0	0	0	0	0	0	0	0	0	0	0	0	0	0	0	0	0	0	0	0	0	0	0	0	0	0	0
422		H5-20-0396-1	59	survived	no MRSA	0	0	0	0	0	0	0	0	0	0	0	0	0	0	0	0	0	0	0	0	0	0	0	0	0	0	0	0	0	0	0	0	0	0	0	0	0	0	0	0	0	0	0	0
423		H5-17-0254-1	59	survived	no MRSA	0	0	0	0	0	0	0	0	0	0	0	0	0	0	0	0	0	0	0	0	0	0	0	0	0	0	0	0	0	0	0	0	0	0	0	0	0	0	0	0	0	0	0	0
424		H5-18-0082-1	10	died	no MRSA	1	0	0	0	0	0	0	0	0	0	0	0	0	0	0	1	0	0	0	0	1	0	0	0	0	0	0	0	0	0	0	0	0	0	0	0	0	0	0	0	0	0	1	1
425		H2-19-0005-1	10	survived	no MRSA	0	0	0	0	0	0	0	0	1	0	0	0	0	0	0	0	0	0	0	0	0	0	0	0	0	0	0	0	0	0	0	0	0	0	0	0	0	0	0	0	0	0	0	1
426		H2-18-0656-1	1027	survived	no MRSA	0	0	0	0	0	0	0	0	0	0	0	0	0	0	0	0	0	0	0	0	0	0	0	0	0	0	0	0	0	0	0	0	0	0	0	0	0	0	0	0	0	0	0	0
427		H4-18-0213-1	1027	survived	no MRSA	0	0	0	0	0	0	0	0	0	0	0	0	0	0	0	0	0	0	0	0	0	0	0	0	0	0	0	0	0	0	0	0	0	0	0	0	0	0	0	0	0	0	0	0
428		H4-17-0294-1	1027	survived	no MRSA	0	0	0	0	0	0	0	0	0	0	0	0	0	0	0	0	0	0	0	0	0	0	0	0	0	0	0	0	0	0	0	0	0	0	0	0	0	0	0	0	0	0	0	0
429		H4-18-0299-1	395	survived	no MRSA	0	0	0	0	0	0	0	0	0	0	0	0	0	0	0	0	0	0	0	0	0	0	0	0	0	0	0	0	0	0	0	0	0	0	0	0	0	0	0	0	1	0	0	0
430		H1-18-0577-1	395	survived	no MRSA	0	0	0	0	0	0	0	0	0	0	0	0	0	0	0	0	0	0	0	0	0	0	0	0	0	0	0	0	0	0	0	0	0	0	0	0	0	0	0	0	1	0	0	0
431		H2-20-0512-1	45 (CC45)	survived	no MRSA	0	0	0	0	0	0	0	0	0	0	0	0	0	0	0	0	0	0	0	0	0	0	0	0	0	0	0	0	0	0	0	0	0	0	0	0	0	0	0	0	0	0	0	0
432		H2-17-0638-1	2748	survived	no MRSA	0	0	0	0	0	0	0	0	0	0	0	0	0	0	0	0	0	0	0	0	0	0	0	0	0	0	0	0	0	0	0	0	0	0	0	0	0	0	0	0	0	0	0	0
433		H3-17-0252-1	45 (CC45)	survived	no MRSA	0	0	0	0	0	0	0	0	0	0	0	0	0	0	0	0	0	0	0	0	0	0	0	0	0	0	0	0	0	0	0	0	0	0	0	0	0	0	0	0	0	0	0	0
434		H3-17-0203-1	-	survived	no MRSA	0	0	0	0	0	0	0	0	0	0	0	0	0	0	0	0	0	0	0	0	0	0	0	0	0	0	0	0	0	0	0	0	0	0	0	0	0	0	0	0	0	0	0	0
435		H2-18-0547-1	45 (CC45)	died	no MRSA	0	0	0	0	0	0	0	0	1	0	0	0	0	0	0	0	0	0	0	0	0	0	0	0	0	0	0	0	0	0	0	0	0	0	0	0	0	0	0	0	0	0	0	0
436		H5-17-0193-1	45 (CC45)	survived	no MRSA	0	0	0	0	0	0	0	0	0	0	0	0	0	0	0	0	0	0	0	0	0	0	0	0	0	0	0	0	0	0	0	0	0	0	0	0	0	0	0	0	0	0	0	0
437		H1-18-0192-1	45 (CC45)	survived	no MRSA	0	0	0	0	0	0	0	0	0	0	0	0	0	0	0	0	0	0	0	0	0	0	0	0	0	0	0	0	0	0	0	0	0	0	0	0	0	0	0	0	0	0	0	0
438		H5-17-0271-1	45 (CC45)	survived	no MRSA	0	0	0	0	0	0	0	0	0	0	0	0	0	0	0	0	0	0	0	0	0	0	0	0	0	0	0	0	0	0	0	0	0	0	0	0	0	0	0	0	0	0	0	0
439		H2-20-0519-1	45 (CC45)	survived	no MRSA	0	0	0	0	0	0	0	0	0	0	0	0	0	0	0	0	0	0	0	0	0	0	0	0	0	0	0	0	0	0	0	0	0	0	0	0	0	0	0	0	0	0	0	0
440		H5-18-0330-1	45 (CC45)	died	no MRSA	0	0	0	0	0	0	0	0	0	0	0	0	0	0	0	0	0	0	0	0	0	0	0	0	0	0	0	0	0	0	0	0	0	0	0	0	0	0	0	0	0	0	0	0
441		H4-18-0423-1	45 (CC45)	survived	no MRSA	0	0	0	0	0	0	0	0	0	0	0	0	0	0	0	0	0	0	0	0	0	0	0	0	0	0	0	0	0	0	0	0	0	0	0	0	0	0	0	0	0	0	0	0
442		H4-18-0153-1	45 (CC45)	survived	no MRSA	0	0	0	0	0	0	0	0	0	0	0	0	0	0	0	0	0	0	0	0	0	0	0	0	0	0	0	0	0	0	0	0	0	0	0	0	0	0	0	0	0	0	0	0
443		H2-18-0416-1	45 (CC45)	survived	no MRSA	0	0	0	0	0	0	0	0	0	0	0	0	0	0	0	0	0	0	0	0	0	0	0	0	0	0	0	0	0	0	0	0	0	0	0	0	0	0	0	0	0	0	0	0
444		H4-18-0178-1	45 (CC45)	survived	no MRSA	0	0	0	0	0	0	0	0	0	0	0	0	0	0	0	0	0	0	0	0	0	0	0	0	0	0	0	0	0	0	0	0	0	0	0	0	0	0	0	0	0	0	0	0
445		H2-18-0269-1	45 (CC45)	died	no MRSA	0	0	0	0	0	0	0	0	0	0	0	0	0	0	0	0	0	0	0	0	0	0	0	0	0	0	0	0	0	0	0	0	0	0	0	0	0	0	0	0	0	0	0	0
446		H1-17-0308-1	-	survived	no MRSA	0	0	0	0	0	0	0	0	0	0	0	0	0	0	0	0	0	0	0	0	0	0	0	0	0	0	0	0	0	0	0	0	0	0	0	0	0	0	0	0	0	0	0	0
447		H2-20-0226-1	45 (CC45)	died	no MRSA	0	0	0	0	0	0	0	0	0	0	0	0	0	0	0	0	0	0	0	0	0	0	0	0	0	0	0	0	0	0	0	0	0	0	0	0	0	0	0	0	0	0	0	0
448		H2-17-0625-1	45 (CC45)	survived	no MRSA	0	0	0	0	0	0	0	0	0	0	0	0	0	0	0	0	0	0	0	0	0	0	0	0	0	0	0	0	0	0	0	0	0	0	0	0	0	0	0	0	0	0	0	0
449		H2-18-0177-1	45 (CC45)	survived	no MRSA	0	0	0	0	0	0	0	0	0	0	0	0	0	0	0	0	0	0	0	0	0	0	0	0	0	0	0	0	0	0	0	0	0	0	0	0	0	0	0	0	0	0	0	0
450		H4-18-0199-1	45 (CC45)	survived	no MRSA	0	0	0	0	0	0	0	0	0	0	0	0	1	0	0	0	0	0	0	0	1	0	0	0	0	0	0	0	0	0	0	0	0	0	0	0	0	0	0	0	0	0	0	0
451		H2-18-0062-1	45 (CC45)	survived	no MRSA	0	0	0	0	0	0	0	0	0	0	0	0	1	0	0	0	0	0	0	0	1	0	0	0	0	0	0	0	0	0	0	0	0	0	0	0	0	0	0	0	0	0	0	0
452		H2-18-0178-1	45 (CC45)	survived	no MRSA	0	0	0	0	0	0	0	0	0	0	0	0	0	0	0	0	0	0	0	0	0	0	0	0	0	0	0	0	0	0	0	0	0	0	0	0	0	0	0	0	0	0	0	0
453		H1-18-0168-1	45 (CC45)	survived	no MRSA	0	0	0	0	0	0	0	0	0	0	0	0	0	0	0	0	0	0	0	0	0	0	0	0	0	0	0	0	0	0	0	0	0	0	0	0	0	0	0	0	0	0	0	0
454		H4-18-0428-1	45 (CC45)	survived	no MRSA	0	0	0	0	0	0	0	0	0	0	0	0	0	0	0	0	0	0	0	0	0	0	0	0	0	0	0	0	0	0	0	0	0	0	0	0	0	0	0	0	0	0	0	0
455		H2-18-0246-1	-	survived	no MRSA	0	0	0	0	0	0	0	0	0	0	0	0	0	0	0	0	0	0	0	0	0	0	0	0	0	0	0	0	0	0	0	0	0	0	0	0	0	0	0	0	0	0	0	0
456		H2-17-0358-1	45 (CC45)	survived	no MRSA	0	0	0	0	0	0	0	0	0	0	0	0	0	0	0	0	0	0	0	0	0	0	0	0	0	0	0	0	0	0	0	0	0	0	0	0	0	0	0	0	0	0	0	0
457		H5-19-0403-1	45 (CC45)	died	no MRSA	0	0	0	0	0	0	0	0	0	0	0	0	0	0	0	0	0	0	0	0	0	0	0	0	0	0	0	0	0	0	0	0	0	0	0	0	0	0	0	0	0	0	0	0
458		H2-17-0190-1	45 (CC45)	survived	no MRSA	0	0	0	1	0	0	0	0	0	0	0	0	0	0	0	0	1	0	0	0	0	0	0	0	0	0	0	0	0	0	0	0	0	0	0	0	0	0	0	0	0	0	0	0
459		H4-17-0207-1	45 (CC45)	survived	no MRSA	0	0	0	0	0	0	0	0	0	0	0	0	0	0	0	0	0	0	0	0	0	0	0	0	0	0	0	0	0	0	0	0	0	0	0	0	0	0	0	0	0	0	0	0
460		H2-19-0037-1	45 (CC45)	survived	no MRSA	0	0	0	0	0	0	0	0	0	0	0	0	0	0	0	0	0	0	0	0	0	0	0	0	0	0	0	0	0	0	0	0	0	0	0	0	0	0	0	0	0	0	0	0
461		H4-18-0170-1	45 (CC45)	survived	no MRSA	0	0	0	0	0	0	0	0	0	0	0	0	1	0	0	0	0	0	0	0	1	0	0	0	0	0	0	0	0	0	0	0	0	0	0	0	0	0	0	0	0	0	0	0
462		H2-18-0144-1	45 (CC45)	survived	no MRSA	0	0	0	0	0	0	0	0	0	0	0	0	0	0	0	0	0	0	0	0	0	0	0	0	0	0	0	0	0	0	0	0	0	0	0	0	0	0	0	0	0	0	0	0
463		H2-20-0173-1	45 (CC45)	survived	no MRSA	0	0	0	0	0	0	0	0	0	0	0	0	0	0	0	0	0	0	0	0	0	0	0	0	0	0	0	0	0	0	0	0	0	0	0	0	0	0	0	0	0	0	0	0
464		H2-19-0014-1	5163	survived	no MRSA	0	0	0	0	0	0	0	0	0	0	1	0	0	0	0	0	0	0	0	0	0	0	0	0	0	0	0	0	0	0	0	0	0	0	0	0	0	0	0	0	0	0	0	0
465		H4-18-0123-1	-	survived	no MRSA	0	0	0	0	0	0	0	0	0	0	0	0	0	0	0	0	0	0	0	0	0	0	0	0	0	0	0	0	0	0	0	0	0	0	0	0	0	0	0	0	0	0	0	0
466		H2-18-0089-1	45 (CC45)	survived	no MRSA	0	0	0	0	0	0	0	0	0	0	0	0	0	0	0	0	0	0	0	0	0	0	0	0	0	0	0	0	0	0	0	0	0	0	0	0	0	0	0	0	0	0	0	0
467		H4-17-0369-1	45 (CC45)	survived	no MRSA	0	0	0	0	0	0	0	0	1	0	0	0	0	0	0	0	0	0	0	0	0	0	0	0	0	0	0	0	0	0	0	0	0	0	0	0	0	0	0	0	0	0	0	0
468		H4-17-0102-1	45 (CC45)	survived	no MRSA	0	0	0	0	0	0	0	0	0	0	0	0	0	0	0	0	0	0	0	0	0	0	0	0	0	0	0	0	0	0	0	0	0	0	0	0	0	0	0	0	0	0	0	0
469		H5-18-0097-1	45 (CC45)	died	no MRSA	0	0	0	0	0	0	0	0	0	0	0	0	0	0	0	0	0	0	0	0	0	0	0	0	0	0	0	0	0	0	0	0	0	0	0	0	0	0	0	0	0	0	0	0
470		H1-17-0445-1	45 (CC45)	survived	no MRSA	0	0	0	0	0	0	0	0	0	0	0	0	0	0	0	0	0	0	0	0	0	0	0	0	0	0	0	0	0	0	0	0	0	0	0	0	0	0	0	0	0	0	0	0
471		H4-18-0498-1	45 (CC45)	survived	no MRSA	0	0	0	0	0	0	0	0	0	0	0	0	0	0	0	0	0	0	0	0	0	0	0	0	0	0	0	0	0	0	0	0	0	0	0	0	0	0	0	0	0	0	0	0
472		H2-18-0627-1	45 (CC45)	survived	no MRSA	0	0	0	0	0	0	0	0	0	0	0	0	0	0	0	1	0	0	0	0	0	0	0	0	0	0	0	0	0	0	0	0	0	0	0	0	0	0	0	0	0	0	0	0
473		H2-18-0353-1	45 (CC45)	survived	no MRSA	0	0	0	0	0	0	0	0	0	0	0	0	0	0	0	0	0	0	0	0	0	0	0	0	0	0	0	0	0	0	0	0	0	0	0	0	0	0	0	0	0	0	0	0
474		H4-18-0396-1	45 (CC45)	survived	no MRSA	0	0	0	0	0	0	0	0	0	0	0	0	0	0	0	0	0	0	0	0	1	0	0	0	0	0	0	0	0	0	0	0	0	0	0	0	0	0	0	0	0	0	0	0
475		H4-18-0368-1	45 (CC45)	survived	no MRSA	0	0	0	0	0	0	0	0	0	0	0	0	0	0	0	0	0	0	0	0	0	0	0	0	0	0	0	0	0	0	0	0	0	0	0	0	0	0	0	0	0	0	0	0
476		H5-19-0382-1	45 (CC45)	survived	no MRSA	0	0	0	0	0	0	0	0	0	0	0	0	1	0	0	0	0	0	0	0	1	0	0	0	0	0	0	0	0	0	0	0	0	0	0	0	0	0	0	0	0	0	0	0
477		H1-18-0074-1	45 (CC45)	survived	no MRSA	0	0	0	0	0	0	0	0	0	0	0	0	1	0	0	0	0	0	0	0	1	0	0	0	0	0	0	0	0	0	0	0	0	0	0	0	0	0	0	0	0	0	0	0
478		H5-18-0378-1	45 (CC45)	survived	no MRSA	0	0	0	0	0	0	0	0	0	0	0	0	0	0	0	0	0	0	0	0	0	0	0	0	0	0	0	0	0	0	0	0	0	0	0	0	0	0	0	0	0	0	0	0
479		H2-17-0400-1	45 (CC45)	survived	no MRSA	0	0	0	0	0	0	0	0	0	0	0	0	0	0	0	0	0	0	0	0	0	0	0	0	0	0	0	0	0	0	0	0	0	0	0	0	0	0	0	0	0	0	0	0
480		H4-18-0323-1	45 (CC45)	survived	no MRSA	0	0	0	0	0	0	0	0	0	0	0	0	0	0	0	0	0	0	0	0	0	0	0	0	0	0	0	0	0	0	0	0	0	0	0	0	0	0	0	0	0	0	0	0
481		H4-18-0162-1	45 (CC45)	survived	no MRSA	0	0	0	0	0	0	0	0	0	0	0	0	0	0	0	0	0	0	0	0	0	0	0	0	0	0	0	0	0	0	0	0	0	0	0	0	0	0	0	0	0	0	0	0
482		H3-17-0173-1	45 (CC45)	survived	no MRSA	0	0	0	0	0	0	0	0	0	0	0	0	0	0	0	0	0	0	0	0	0	0	0	0	0	0	0	0	0	0	0	0	0	0	0	0	0	0	0	0	0	0	0	0
483		H2-17-0276-1	45 (CC45)	died	no MRSA	0	0	0	0	0	0	0	0	0	0	0	0	1	0	0	0	0	0	0	0	1	0	0	0	0	0	0	0	0	0	0	0	0	0	0	0	0	0	0	0	0	0	0	0
484		H1-18-0281-1	45 (CC45)	survived	no MRSA	0	0	0	0	0	0	0	0	0	0	0	0	0	0	0	0	0	0	0	1	1	0	0	0	0	0	0	0	0	0	0	0	0	0	0	0	0	0	0	0	0	0	0	0
485		H5-18-0135-1	45 (CC45)	survived	no MRSA	0	0	0	0	0	0	0	0	0	0	0	0	0	0	0	0	0	0	0	0	0	0	0	0	0	0	0	0	0	0	0	0	0	0	0	0	0	0	0	0	0	0	0	0
486		H2-18-0261-1	45 (CC45)	died	no MRSA	0	0	0	0	0	0	0	0	0	0	0	0	0	0	0	0	0	0	0	0	0	0	0	0	0	0	0	0	0	0	0	0	0	0	0	0	0	0	0	0	0	0	0	0
487		H4-17-0363-1	45 (CC45)	survived	no MRSA	0	0	0	0	0	0	0	0	0	0	0	0	0	0	0	0	0	0	0	0	0	0	0	0	0	0	0	0	0	0	0	0	0	0	0	0	0	0	0	0	0	0	0	0
488		H1-18-0021-1	45 (CC45)	survived	no MRSA	0	0	0	0	0	0	0	0	0	0	0	0	0	0	0	0	0	0	0	1	0	0	0	0	0	0	0	0	0	0	0	0	0	0	0	0	0	0	0	0	0	0	0	0
489		H1-17-0478-1	45 (CC45)	survived	no MRSA	0	0	0	0	0	0	0	0	0	0	0	0	0	0	0	0	0	0	0	0	0	0	0	0	0	0	0	0	0	0	0	0	0	0	0	0	0	0	0	0	0	0	0	0
490		H4-17-0193-1	45 (CC45)	survived	no MRSA	0	0	0	0	0	0	0	0	0	0	0	0	0	0	0	0	0	0	0	0	0	0	0	0	0	0	0	0	0	0	0	0	0	0	0	0	0	0	0	0	0	0	0	0
491		H2-20-0591-1	45 (CC45)	survived	no MRSA	0	0	0	0	0	0	0	0	0	0	0	0	0	0	0	0	0	0	0	0	0	0	0	0	0	0	0	0	0	0	0	0	0	0	0	0	0	0	0	0	0	0	0	0
492		H4-18-0049-1	47	survived	no MRSA	0	0	0	0	1	1	1	1	0	0	0	0	0	1	0	0	0	0	0	1	0	0	0	0	0	0	0	0	0	0	0	0	0	0	0	0	0	0	0	0	0	0	0	0
493		H2-18-0203-1	47	survived	no MRSA	0	0	0	0	0	0	0	0	0	0	0	0	0	0	0	0	0	0	0	0	0	0	0	0	0	0	0	0	0	0	0	0	0	0	0	0	0	0	0	0	0	0	0	0
494		H2-20-0714-1	45 (CC45)	died	no MRSA	0	0	0	0	0	0	0	0	0	0	0	0	0	0	0	0	0	0	0	0	1	0	0	0	0	0	0	0	0	0	0	0	0	0	0	0	0	0	0	0	0	0	0	0
495		H1-17-0470-1	45 (CC45)	died	no MRSA	0	0	0	0	0	0	0	0	0	0	0	0	0	0	0	0	0	0	0	0	0	0	0	0	0	0	0	0	0	0	0	0	0	0	0	0	0	0	0	0	0	0	0	0
496		H2-20-0410-1	45 (CC45)	survived	no MRSA	0	0	0	0	0	0	0	0	0	0	0	0	1	0	0	0	0	0	0	0	1	0	0	0	0	0	0	0	0	0	0	0	0	0	0	0	0	0	0	0	0	0	0	0
497		H2-18-0540-1	45 (CC45)	survived	no MRSA	0	0	0	0	0	0	0	0	0	0	0	0	0	0	0	0	0	0	0	0	0	0	0	0	0	0	0	0	0	0	0	0	0	0	0	0	0	0	0	0	0	0	0	0
498		H2-17-0459-1	45 (CC45)	survived	no MRSA	0	0	0	0	0	0	0	0	0	0	0	0	0	0	0	0	0	0	0	0	0	0	0	0	0	0	0	0	0	0	0	0	0	0	0	0	0	0	0	0	0	0	0	0
499		H5-18-0198-1	45 (CC45)	survived	no MRSA	0	0	0	0	0	0	0	0	0	0	0	0	0	0	0	0	0	0	0	1	0	0	0	0	0	0	0	0	0	0	0	0	0	0	0	0	0	0	0	0	0	0	0	0
500		H5-17-0221-1	-	survived	no MRSA	0	0	0	0	0	0	0	0	0	0	0	0	0	0	0	0	0	0	0	0	0	0	0	0	0	0	0	0	0	0	0	0	0	0	0	0	0	0	0	0	0	0	0	0
501		H2-20-0097-1	-	survived	no MRSA	0	0	0	0	0	0	0	0	0	0	0	0	0	0	0	0	0	0	0	0	0	0	0	0	0	0	0	0	0	0	0	0	0	0	0	0	0	0	0	0	0	0	0	0
502		H4-17-0412-1	-	survived	no MRSA	0	0	0	0	0	0	0	0	0	0	0	0	0	0	0	0	0	0	0	0	0	0	0	0	0	0	0	0	0	0	0	0	0	0	0	0	0	0	0	0	0	0	0	0
503		H2-17-0404-1	45 (CC45)	survived	MRSA	0	0	0	0	0	0	0	0	0	0	0	0	0	0	0	0	0	0	0	0	0	0	0	0	0	0	0	0	0	0	0	0	0	0	0	0	0	0	0	0	0	0	0	0
504		H2-17-0395-1	45 (CC45)	survived	MRSA	0	0	0	0	0	0	0	0	0	0	0	0	0	1	0	0	0	0	0	1	0	0	0	0	0	0	0	0	0	0	0	0	0	0	0	0	0	0	0	0	0	0	0	0
505		H4-18-0175-1	45 (CC45)	died	MRSA	0	0	0	0	0	0	0	0	0	0	0	0	0	0	0	0	0	0	0	0	0	0	0	0	0	0	0	0	0	0	0	0	0	0	0	0	0	0	0	0	0	0	0	0
506		H4-17-0315-1	46	survived	no MRSA	0	0	0	0	0	0	0	0	0	0	0	0	0	0	0	0	0	0	0	0	0	0	0	0	0	0	0	0	0	0	0	0	0	0	0	0	0	0	0	0	0	0	0	0
507		H2-17-0576-1	46	survived	no MRSA	0	0	0	0	0	0	0	0	0	0	0	0	0	0	0	0	0	0	0	0	0	0	0	0	0	0	0	0	0	0	0	0	0	0	0	0	0	0	0	0	0	0	0	0
508		H2-18-0480-1	45 (CC45)	died	no MRSA	0	0	0	0	0	0	0	0	0	0	0	0	0	0	0	0	0	0	0	0	0	0	0	0	0	0	0	0	0	0	0	0	0	0	0	0	0	0	0	0	0	0	0	0
509		H5-18-0020-1	-	survived	no MRSA	0	0	0	0	0	0	0	0	0	0	0	0	0	0	0	0	0	0	0	0	0	0	0	0	0	0	0	0	0	0	0	0	0	0	0	0	0	0	0	0	0	0	0	0
510		H2-17-0364-1	-	survived	no MRSA	0	0	0	0	0	0	0	0	0	0	0	0	0	0	0	0	0	0	0	0	0	0	0	0	0	0	0	0	0	0	0	0	0	0	0	0	0	0	0	0	0	0	0	0
511		H1-18-0284-1	45 (CC45)	survived	no MRSA	0	0	0	0	0	0	0	0	0	0	0	0	0	0	0	0	0	0	0	0	0	0	0	0	0	0	0	0	0	0	0	0	0	0	0	0	0	0	0	0	0	0	0	0
512		H2-17-0476-1	45 (CC45)	died	no MRSA	0	0	0	0	0	0	0	0	0	0	0	0	0	0	0	0	0	0	0	0	0	0	0	0	0	0	0	0	0	0	0	0	0	0	0	0	0	0	0	0	0	0	0	0
513		H2-20-0604-1	-	survived	no MRSA	0	0	0	0	0	0	0	0	1	0	0	0	0	0	0	0	0	0	0	1	0	0	0	0	0	0	0	0	0	0	0	0	0	0	0	0	0	0	0	0	0	0	0	0
514		H4-18-0047-1	45 (CC45)	survived	no MRSA	0	0	0	0	0	0	0	0	0	0	0	0	0	0	0	0	0	0	0	0	0	0	0	0	0	0	0	0	0	0	0	0	0	0	0	0	0	0	0	0	0	0	0	0
515		H4-18-0038-1	45 (CC45)	died	no MRSA	0	0	0	0	0	0	0	0	0	0	0	0	0	0	0	0	0	0	0	0	0	0	0	0	0	0	0	0	0	0	0	0	0	0	0	0	0	0	0	0	0	0	0	0
516		H4-18-0125-1	45 (CC45)	survived	no MRSA	0	0	0	0	0	0	0	0	1	0	0	0	0	0	0	0	0	0	0	1	0	0	0	0	0	0	0	0	0	0	0	0	0	0	0	0	0	0	0	0	0	0	0	0
517		H2-17-0265-1	45 (CC45)	survived	no MRSA	0	0	0	0	0	0	0	0	0	0	0	0	0	0	0	0	0	0	0	1	0	0	0	0	0	0	0	0	0	0	0	0	0	0	0	0	0	0	0	0	0	0	0	0
518		H5-19-0406-1	45 (CC45)	survived	no MRSA	0	0	0	0	0	0	0	0	0	0	0	0	0	0	0	0	0	0	0	0	0	0	0	0	0	0	0	0	0	0	0	0	0	0	0	0	0	0	0	0	0	0	0	0
519		H4-18-0389-1	256	died	no MRSA	0	0	0	0	0	0	0	0	0	0	0	0	0	0	0	0	0	0	0	0	0	0	0	0	0	0	0	0	0	0	0	0	0	0	0	0	0	0	0	0	0	0	0	0
520		H4-18-0253-1	-	survived	no MRSA	0	0	0	0	0	0	0	0	1	0	0	0	0	0	0	0	0	0	0	1	1	0	0	0	0	0	0	0	0	0	0	0	0	0	0	0	0	0	0	0	0	0	0	0
521		H4-18-0015-1	-	died	no MRSA	0	0	0	0	0	0	0	0	1	0	0	0	0	0	0	0	0	0	0	1	0	0	0	0	0	0	0	0	0	0	0	0	0	0	0	0	0	0	0	0	0	0	0	0
522		H5-19-0346-1	45 (CC45)	survived	no MRSA	0	0	0	0	0	0	0	0	0	0	0	0	0	0	0	0	0	0	0	0	0	0	0	0	0	0	0	0	0	0	0	0	0	0	0	0	0	0	0	0	0	0	0	0
523		H1-18-0149-1	45 (CC45)	died	no MRSA	0	0	0	0	0	0	0	0	0	0	0	0	0	0	0	0	0	0	0	1	0	0	0	0	0	0	0	0	0	0	0	0	0	0	0	0	0	0	0	0	0	0	0	0
524		H1-18-0059-1	45 (CC45)	survived	no MRSA	0	0	0	0	0	0	0	0	0	0	0	0	0	0	0	0	0	0	0	0	0	0	0	0	0	0	0	0	0	0	0	0	0	0	0	0	0	0	0	0	0	0	0	0
525		H1-18-0418-1	45 (CC45)	survived	no MRSA	0	0	0	0	0	0	0	0	0	0	0	0	0	0	0	0	0	0	0	0	0	0	0	0	0	0	0	0	0	0	0	0	0	0	0	0	0	0	0	0	0	0	0	0
526		H5-18-0167-1	45 (CC45)	survived	no MRSA	0	0	0	0	0	0	0	0	1	0	0	0	0	0	0	0	0	0	0	0	0	0	0	0	0	0	0	0	0	0	0	0	0	0	0	0	0	0	0	0	0	0	0	0
527		H2-20-0499-1	45 (CC45)	died	no MRSA	0	0	0	0	0	0	0	0	0	0	0	0	0	0	0	0	0	0	0	0	0	0	0	0	0	0	0	0	0	0	0	0	0	0	0	0	0	0	0	0	0	0	0	0
528		H4-18-0077-1	6289	survived	no MRSA	0	0	0	0	0	0	0	0	0	0	0	0	0	0	0	0	0	0	0	0	0	0	0	0	0	0	0	0	0	0	0	0	0	0	0	0	0	0	0	0	0	0	0	0
529		H2-20-0297-1	45 (CC45)	died	no MRSA	0	0	0	0	0	0	0	0	0	0	0	0	0	0	0	0	0	0	0	1	0	0	0	0	0	0	0	0	0	0	0	0	0	0	0	0	0	0	0	0	0	0	0	0
530		H5-18-0192-1	291	survived	no MRSA	0	0	0	0	0	0	0	0	0	0	0	0	0	0	0	0	0	0	0	0	0	0	0	0	0	0	0	0	0	0	0	0	0	0	0	0	0	0	0	0	0	0	0	1
531		H4-17-0430-1	291	survived	no MRSA	0	0	0	0	0	0	0	0	0	0	0	0	0	0	0	0	0	0	0	0	0	0	0	0	0	0	0	0	0	0	0	0	0	0	0	0	0	0	0	0	0	0	0	1
532		H4-18-0289-1	291	survived	no MRSA	0	0	0	0	0	0	0	0	0	0	0	0	0	0	0	0	0	0	0	0	0	0	0	0	0	0	0	0	0	0	0	0	0	0	0	0	0	0	0	0	0	0	0	1
533		H2-20-0129-1	291	survived	no MRSA	0	0	0	0	0	0	0	0	0	0	0	0	0	0	0	0	0	0	0	0	0	0	0	0	0	0	0	0	0	0	0	0	0	0	0	0	0	0	0	0	0	0	0	1
534		H2-20-0339-1	-	died	no MRSA	0	0	0	0	0	0	0	0	0	0	0	0	0	0	0	0	0	0	0	0	0	0	0	0	0	0	0	0	0	0	0	0	0	0	0	0	0	0	0	0	0	0	0	0
535		H5-17-0125-1	398	survived	no MRSA	0	0	0	0	0	0	0	0	0	0	0	0	0	0	0	0	0	0	0	0	0	0	0	0	0	0	0	0	0	0	0	0	0	0	0	0	0	0	0	0	0	0	0	0
536		H2-18-0292-1	398	survived	no MRSA	0	0	0	0	0	0	0	0	0	0	0	0	0	0	0	0	0	0	0	0	0	0	0	0	0	0	0	0	0	0	0	0	0	0	0	0	0	0	0	0	0	0	0	0
537		H2-18-0648-1	398	survived	no MRSA	0	0	0	0	0	0	0	0	0	0	0	0	0	0	0	0	0	0	0	0	0	0	0	0	0	0	0	0	0	0	0	0	0	0	0	0	0	0	0	0	0	0	0	0
538		H2-18-0700-1	398	survived	no MRSA	0	0	0	0	0	0	0	0	0	0	0	0	0	0	0	0	1	0	0	0	0	0	0	0	0	0	0	0	0	0	0	0	0	0	0	0	0	0	0	0	0	0	0	0
539		H5-17-0096-1	398	survived	no MRSA	0	0	0	0	0	0	0	0	0	0	0	0	0	0	0	0	0	0	0	0	0	0	0	0	0	0	0	0	0	0	0	0	0	0	0	0	0	0	0	0	0	0	0	0
540		H5-20-0164-1	398	survived	no MRSA	0	0	0	0	0	0	0	0	0	0	0	0	0	0	0	0	0	0	0	0	0	0	0	0	0	0	0	0	0	0	0	0	0	0	0	0	0	0	0	0	0	0	0	0
541		H5-17-0170-1	398	survived	no MRSA	0	0	0	0	0	0	0	0	0	0	0	0	0	0	0	0	0	0	0	0	0	0	0	0	0	0	0	0	0	0	0	0	0	0	0	0	0	0	0	0	0	0	0	0
542		H5-17-0077-1	398	survived	no MRSA	0	0	0	0	0	0	0	0	0	0	0	0	1	0	0	0	0	0	0	0	1	0	0	0	0	0	0	0	0	0	0	0	0	0	0	0	0	0	0	0	0	0	0	0
543		H2-18-0446-1	398	survived	no MRSA	0	0	0	0	0	0	0	0	0	0	0	0	0	0	0	0	0	0	0	0	0	0	0	0	0	0	0	0	0	0	0	0	0	0	0	0	0	0	0	0	0	0	0	0
544		H2-20-0578-1	398	survived	no MRSA	0	0	0	0	0	0	0	0	0	0	0	0	0	0	0	0	0	0	0	0	0	0	0	0	0	0	0	0	0	0	0	0	0	0	0	0	0	0	0	0	0	0	0	0
545		H2-20-0115-1	398	survived	no MRSA	0	0	0	0	0	0	0	0	0	0	0	0	0	0	0	0	0	0	0	0	0	0	0	0	0	0	0	0	0	0	0	0	0	0	0	0	0	0	0	0	0	0	0	0
546		H4-18-0159-1	398	survived	no MRSA	0	0	0	0	0	0	0	0	0	0	0	0	0	0	0	0	0	0	0	0	0	0	0	0	0	0	0	0	0	0	0	0	0	0	0	0	0	0	0	0	0	0	0	0
547		H4-17-0269-1	398	died	no MRSA	0	0	0	0	0	0	0	0	0	0	0	0	0	0	0	0	0	0	0	0	0	0	0	0	0	0	0	0	0	0	0	0	0	0	0	0	0	0	0	0	0	0	0	0
548		H2-18-0435-1	398	survived	no MRSA	0	0	0	0	0	0	0	0	0	0	0	0	0	0	0	0	0	0	0	0	0	0	0	0	0	0	0	0	0	0	0	0	0	0	0	0	0	0	0	0	0	0	0	0
549		H2-18-0733-1	398	survived	no MRSA	0	0	0	0	0	0	0	0	0	0	0	0	0	0	0	0	0	0	0	0	0	0	0	0	0	0	0	0	0	0	0	0	0	0	0	0	0	0	0	0	0	0	0	0
550		H4-18-0137-1	398	survived	no MRSA	0	0	0	0	0	0	0	0	0	0	0	0	0	0	0	0	0	0	0	0	0	0	0	0	0	0	0	0	0	0	0	0	0	0	0	0	0	0	0	0	0	0	0	0
551		H2-17-0412-1	398	survived	no MRSA	0	0	0	0	0	0	0	0	0	0	0	0	0	0	0	0	0	0	0	0	0	0	0	0	0	0	0	0	0	0	0	0	0	0	0	0	0	0	0	0	0	0	0	0
552		H5-20-0297-1	398	survived	no MRSA	0	0	0	0	0	0	0	0	0	0	0	0	0	0	0	0	0	0	0	0	0	0	0	0	0	0	0	0	0	0	0	0	0	0	0	0	0	0	0	0	0	0	0	0
553		H2-17-0531-1	398	died	no MRSA	0	0	0	0	0	0	0	0	0	0	0	0	0	0	0	0	0	0	0	0	0	0	0	0	0	0	0	0	0	0	0	0	0	0	0	0	0	0	0	0	0	0	0	0
554		H2-20-0563-1	398	survived	no MRSA	0	0	0	0	0	0	0	0	0	0	0	0	0	0	0	0	0	0	0	0	0	0	0	0	0	0	0	0	0	0	0	0	0	0	0	0	0	0	0	0	0	0	0	0
555		H2-17-0456-1	398	survived	no MRSA	0	0	0	0	0	0	0	0	0	0	0	0	0	0	0	0	0	0	0	0	0	0	0	0	0	0	0	0	0	0	0	0	0	0	0	0	0	0	0	0	0	0	0	0
556		H2-18-0458-1	398	died	no MRSA	0	0	0	0	0	0	0	0	0	0	0	0	0	0	0	0	0	0	0	0	0	0	0	0	0	0	0	0	0	0	0	0	0	0	0	0	0	0	0	0	0	0	0	0
557		H2-18-0450-1	398	survived	no MRSA	0	0	0	0	0	0	0	0	0	0	0	0	0	0	0	0	0	0	0	0	0	0	0	0	0	0	0	0	0	0	0	0	0	0	0	0	0	0	0	0	0	0	0	0
558		H2-18-0556-1	398	survived	no MRSA	0	0	0	0	0	0	0	0	0	0	0	0	0	0	0	0	0	0	0	0	0	0	0	0	0	0	0	0	0	0	0	0	0	0	0	0	0	0	0	0	0	0	0	0
559		H2-17-0485-1	398	died	no MRSA	0	0	0	0	0	0	0	0	0	0	0	0	0	0	0	1	1	0	0	0	0	0	0	0	0	0	0	0	0	0	0	0	0	0	0	0	0	0	0	0	0	0	0	0
560		H2-20-0395-1	398	survived	no MRSA	0	0	0	0	0	0	0	0	0	0	0	0	0	0	0	0	0	0	0	0	0	0	0	0	0	0	0	0	0	0	0	0	0	0	0	0	0	0	0	0	0	0	0	0
561		H2-18-0029-1	398	survived	no MRSA	0	0	0	0	0	0	0	0	0	0	0	0	0	0	0	0	0	0	0	0	0	0	0	0	0	0	0	0	0	0	0	0	0	0	0	0	0	0	0	0	0	0	0	0
562		H2-20-0087-1	398	survived	no MRSA	0	0	0	0	0	0	0	0	0	0	0	0	0	0	0	0	0	0	0	0	0	0	0	0	0	0	0	0	0	0	0	0	0	0	0	0	0	0	0	0	0	0	0	0
563		H2-20-0445-1	398	died	no MRSA	0	0	0	0	0	0	0	0	1	0	0	0	0	0	0	0	0	0	0	0	0	0	0	0	0	0	0	0	0	0	0	0	0	0	0	0	0	0	0	0	0	0	0	0
564		H2-20-0083-1	398	survived	no MRSA	0	0	0	0	0	0	0	0	0	0	0	0	0	0	0	0	0	0	0	0	0	0	0	0	0	0	0	0	0	0	0	0	0	0	0	0	0	0	0	0	0	0	0	0
565		H4-17-0401-1	398	survived	no MRSA	0	0	0	0	0	0	0	0	0	0	0	0	0	0	0	0	0	0	0	0	0	0	0	0	0	0	0	0	0	0	0	0	0	0	0	0	0	0	0	0	0	0	0	0
566		H5-20-0038-1	398	survived	no MRSA	0	0	0	0	0	0	0	0	0	0	0	0	0	0	0	0	0	0	0	0	0	0	0	0	0	0	0	0	0	0	0	0	0	0	0	0	0	0	0	0	0	0	0	0
567		H1-18-0360-1	398	survived	no MRSA	0	0	0	0	0	0	0	0	0	0	0	0	0	0	0	0	0	0	0	0	0	0	0	0	0	0	0	0	0	0	0	0	0	0	0	0	0	0	0	0	0	0	0	0
568		H1-17-0621-1	398	survived	no MRSA	0	0	0	0	0	0	0	0	0	0	0	0	0	0	0	0	0	0	0	0	0	0	0	0	0	0	0	0	0	0	0	0	0	0	0	0	0	0	0	0	0	0	0	0
569		H1-17-0387-1	398	survived	no MRSA	0	0	0	0	0	0	0	0	0	0	0	0	0	0	0	1	0	0	0	0	0	0	0	0	0	0	0	0	0	0	0	0	0	0	0	0	0	0	0	0	0	0	0	0
570		H2-20-0327-1	398	survived	no MRSA	0	0	0	0	0	0	0	0	0	0	0	0	0	0	0	0	0	0	0	0	0	0	0	0	0	0	0	0	0	0	0	0	0	0	0	0	0	0	0	0	0	0	0	0
571		H4-17-0071-1	34	died	no MRSA	0	0	0	0	0	0	0	0	0	0	0	0	0	0	0	1	1	0	0	0	1	0	0	0	0	0	0	0	0	0	0	0	0	0	0	0	0	0	0	0	1	1	1	1
572		H2-20-0491-1	1708	survived	no MRSA	0	0	0	0	0	0	0	0	0	0	0	0	0	0	0	0	0	0	0	0	1	0	0	0	0	0	0	0	0	0	0	0	0	0	0	0	0	0	0	0	0	1	1	1
573		H2-17-0182-1	1708	died	no MRSA	0	0	1	1	0	0	0	0	0	0	0	0	0	0	0	1	1	0	0	0	1	0	0	0	0	0	0	0	0	0	0	0	0	0	0	0	0	0	0	0	1	1	1	1
574		H1-18-0113-1	-	survived	no MRSA	0	0	1	0	0	0	0	0	0	0	0	0	0	0	0	0	0	0	0	0	0	0	0	0	0	0	0	0	0	0	0	0	0	0	0	0	0	0	0	0	1	1	1	1
575		H2-17-0615-1	34	died	no MRSA	0	0	1	0	0	0	0	0	0	0	0	0	0	0	0	0	0	0	0	0	1	0	0	0	0	0	0	0	0	0	0	0	0	0	0	0	0	0	0	0	1	1	1	1
576		H5-18-0374-1	34	died	no MRSA	0	0	0	0	0	0	0	0	0	0	0	0	0	0	0	0	0	0	0	0	0	0	0	0	0	0	0	0	0	0	0	0	0	0	0	0	0	0	0	0	1	1	1	1
577		H2-19-0715-1	34	survived	no MRSA	0	0	0	0	0	0	0	0	0	0	0	0	0	0	0	0	0	0	0	0	1	0	0	0	0	0	0	0	0	0	0	0	0	0	0	0	0	0	0	0	1	1	1	1
578		H1-18-0354-1	34	survived	no MRSA	0	0	0	0	0	0	0	0	0	0	0	0	0	0	0	1	1	0	0	0	1	0	0	0	0	0	0	0	0	0	0	0	0	0	0	0	0	0	0	0	1	1	1	1
579		H2-18-0650-1	34	survived	no MRSA	0	0	0	0	0	0	0	0	0	0	0	0	0	0	0	1	1	0	0	0	1	0	0	0	0	0	0	0	0	0	0	0	0	0	0	0	0	0	0	0	1	1	1	1
580		H1-17-0486-1	30 (CC30)	survived	no MRSA	0	0	0	0	0	0	0	0	0	0	0	0	0	0	0	0	0	0	0	0	1	0	0	0	0	0	0	0	0	0	0	0	0	0	0	0	0	0	0	0	1	1	1	1
581		H3-17-0348-1	30 (CC30)	survived	no MRSA	0	0	0	0	0	0	0	0	0	0	0	0	0	0	0	0	0	0	0	0	0	0	0	0	0	0	0	0	0	0	0	0	0	0	0	0	0	0	0	0	1	1	1	1
582		H1-18-0287-1	39	survived	no MRSA	0	0	0	0	0	0	0	0	0	0	0	0	1	0	0	0	0	0	0	0	1	0	0	0	0	0	0	0	0	0	0	0	0	0	0	0	0	0	0	0	1	1	1	1
583		H2-18-0609-1	30 (CC30)	survived	no MRSA	0	0	0	0	0	0	0	0	0	0	0	0	0	0	0	0	0	0	0	0	0	0	0	0	0	0	0	0	0	0	0	0	0	0	0	0	0	0	0	0	0	1	1	1
584		H5-18-0240-1	30 (CC30)	survived	no MRSA	0	0	0	0	0	0	0	0	0	0	0	0	1	0	0	0	0	0	0	0	0	0	0	0	0	0	0	0	0	0	0	0	0	0	0	0	0	0	0	0	1	1	1	1
585		H2-17-0227-1	4805	died	no MRSA	0	0	0	0	0	0	0	0	0	0	0	0	1	0	0	1	0	0	0	0	1	0	0	0	0	0	0	0	0	0	0	0	0	0	0	0	0	0	0	0	1	1	1	0
586		H5-19-0365-1	30 (CC30)	died	no MRSA	0	0	0	0	0	0	0	0	0	0	0	0	0	0	0	0	0	0	0	0	1	0	0	0	0	0	0	0	0	0	0	0	0	0	0	0	0	0	0	0	1	1	1	1
587		H5-20-0163-1	30 (CC30)	survived	no MRSA	0	0	0	0	0	0	0	0	0	0	0	0	0	0	0	1	0	0	0	0	1	0	0	0	0	0	0	0	0	0	0	0	0	0	0	0	0	0	0	0	1	1	0	1
588		H5-18-0111-1	30 (CC30)	survived	no MRSA	0	0	0	0	0	0	0	0	0	0	0	0	0	0	0	1	0	0	0	0	0	0	0	0	0	0	0	0	0	0	0	0	0	0	0	0	0	0	0	0	1	1	0	1
589		H5-18-0397-1	30 (CC30)	survived	no MRSA	0	0	0	0	0	0	0	0	0	0	0	0	0	0	0	0	0	0	0	0	1	0	0	0	0	0	0	0	0	0	0	0	0	0	0	0	0	0	0	0	1	1	1	1
590		H4-18-0258-1	-	survived	no MRSA	0	0	0	0	0	0	0	0	0	0	0	0	0	0	0	0	0	0	0	0	1	0	0	0	0	0	0	0	0	0	0	0	0	0	0	0	0	0	0	0	1	1	1	1
591		H5-18-0322-1	30 (CC30)	survived	no MRSA	0	0	0	1	0	0	0	0	0	0	0	0	0	0	0	1	1	0	0	0	1	0	0	0	0	0	0	0	0	0	0	0	0	0	0	0	0	0	0	0	1	1	1	1
592		H4-17-0275-1	30 (CC30)	survived	no MRSA	0	0	0	0	0	0	0	0	0	0	0	0	0	0	0	0	0	0	0	0	1	0	0	0	0	0	0	0	0	0	0	0	0	0	0	0	0	0	0	0	1	1	1	1
593		H5-20-0358-1	30 (CC30)	survived	no MRSA	0	0	0	0	0	0	0	0	0	0	0	0	0	0	0	1	1	0	0	0	1	0	0	0	0	0	0	0	0	0	0	0	0	0	0	0	0	0	0	0	0	1	1	1
594		H4-18-0335-1	30 (CC30)	died	no MRSA	0	0	0	0	0	0	0	0	0	0	0	0	0	0	0	0	0	0	0	0	1	0	0	0	0	0	0	0	0	0	0	0	0	0	0	0	0	0	0	0	1	1	0	1
595		H4-18-0025-1	30 (CC30)	died	no MRSA	0	0	0	0	0	0	0	0	0	0	0	0	0	0	0	1	1	0	0	0	1	0	0	0	0	0	0	0	0	0	0	0	0	0	0	0	0	0	0	0	1	1	1	1
596		H2-20-0236-1	30 (CC30)	survived	no MRSA	0	0	0	0	0	0	0	0	0	0	0	0	0	0	0	0	0	0	0	0	1	0	0	0	0	0	0	0	0	0	0	0	0	0	0	0	0	0	0	0	1	1	1	1
597		H5-18-0319-1	30 (CC30)	died	no MRSA	0	0	1	0	0	0	0	0	0	0	0	0	0	0	0	0	0	0	0	0	1	0	0	0	0	0	0	0	0	0	0	0	0	0	0	0	0	0	0	0	1	1	1	1
598		H4-18-0370-1	30 (CC30)	died	no MRSA	0	0	0	0	0	0	0	0	0	0	0	0	0	0	0	0	0	0	0	0	1	0	0	0	0	0	0	0	0	0	0	0	0	0	0	0	0	0	0	0	1	1	1	1
599		H2-20-0001-1	30 (CC30)	survived	no MRSA	0	0	0	0	0	0	0	0	0	0	0	0	0	0	0	0	0	0	0	0	1	0	0	0	0	0	0	0	0	0	0	0	0	0	0	0	0	0	0	0	1	1	1	1
600		H2-17-0343-1	-	survived	no MRSA	0	0	0	0	0	0	0	0	0	0	0	0	0	0	0	0	0	0	0	0	1	0	0	0	0	0	0	0	0	0	0	0	0	0	0	0	0	0	0	0	1	1	1	1
601		H2-17-0211-1	30 (CC30)	survived	no MRSA	0	0	0	0	0	0	0	0	0	0	0	0	0	0	0	0	0	0	0	0	1	0	0	0	0	0	0	0	0	0	0	0	0	0	0	0	0	0	0	0	1	1	1	1
602		H2-19-0049-1	30 (CC30)	died	no MRSA	0	0	0	0	0	0	0	0	0	0	0	0	0	0	0	1	1	0	0	0	1	0	0	0	0	0	0	0	0	0	0	0	0	0	0	0	0	0	0	0	1	1	1	1
603		H4-18-0372-1	30 (CC30)	survived	no MRSA	0	0	0	0	0	0	0	0	0	0	0	0	0	0	0	0	0	0	0	0	1	0	0	0	0	0	0	0	0	0	0	0	0	0	0	0	0	0	0	0	1	1	1	1
604		H2-17-0303-1	30 (CC30)	survived	no MRSA	0	0	0	0	0	0	0	0	0	0	0	0	0	0	0	0	0	0	0	0	1	0	0	0	0	0	0	0	0	0	0	0	0	0	0	0	0	0	0	0	1	1	1	1
605		H2-20-0631-1	30 (CC30)	died	no MRSA	0	0	0	0	0	0	0	0	0	0	0	0	0	0	0	0	0	0	0	0	1	0	0	0	0	0	0	0	0	0	0	0	0	0	0	0	0	0	0	0	1	1	1	1
606		H2-20-0404-1	30 (CC30)	survived	no MRSA	0	0	0	0	0	0	0	0	0	0	0	0	0	0	0	0	0	0	0	0	1	0	0	0	0	0	0	0	0	0	0	0	0	0	0	0	0	0	0	0	1	1	1	1
607		H2-20-0415-1	30 (CC30)	survived	no MRSA	0	0	0	0	0	0	0	0	0	0	0	0	0	0	0	1	1	0	0	0	1	0	0	0	0	0	0	0	0	0	0	0	0	0	0	0	0	0	0	0	1	1	1	1
608		H2-18-0724-1	30 (CC30)	survived	no MRSA	0	0	0	0	0	0	0	0	0	0	0	0	0	0	0	1	1	0	0	0	1	0	0	0	0	0	0	0	0	0	0	0	0	0	0	0	0	0	0	0	1	1	1	1
609		H5-20-0076-1	30 (CC30)	survived	MRSA	0	0	0	0	0	0	0	0	0	0	0	0	0	0	0	0	0	0	0	0	1	0	0	0	0	0	0	0	0	0	0	0	0	0	0	0	0	0	0	0	1	1	1	1
610		H1-18-0437-1	30 (CC30)	survived	no MRSA	0	0	0	0	0	0	0	0	0	0	0	0	0	0	0	0	0	0	0	0	1	0	0	0	0	0	0	0	0	0	0	0	0	0	0	0	0	0	0	0	1	1	1	1
611		H4-17-0134-1	30 (CC30)	survived	no MRSA	0	0	0	0	0	0	0	0	0	0	0	0	0	0	0	1	1	0	0	0	1	0	0	0	0	0	0	0	0	0	0	0	0	0	0	0	0	0	0	0	1	1	1	1
612		H2-18-0220-1	30 (CC30)	survived	no MRSA	0	0	0	0	0	0	0	0	0	0	0	0	0	0	0	1	1	0	0	0	1	0	0	0	0	0	0	0	0	0	0	0	0	0	0	0	0	0	0	0	1	1	1	1
613		H2-18-0124-1	30 (CC30)	died	no MRSA	1	0	0	0	0	0	0	0	0	0	0	0	0	0	0	1	1	0	0	0	1	0	0	0	0	0	0	0	0	0	0	0	0	0	0	0	0	0	0	0	1	1	1	1
614		H4-17-0216-1	30 (CC30)	survived	no MRSA	0	0	0	0	0	0	0	0	0	0	0	0	0	0	0	1	0	0	0	0	1	0	0	0	0	0	0	0	0	0	0	0	0	0	0	0	0	0	0	0	1	1	1	1
615		H4-17-0192-1	30 (CC30)	survived	MRSA	0	0	0	1	0	0	0	0	0	0	0	0	0	0	0	1	0	0	0	0	1	0	0	0	0	0	0	0	0	0	0	0	0	0	0	0	0	0	0	0	1	1	1	1
616		H5-20-0228-1	30 (CC30)	survived	no MRSA	0	0	0	0	0	0	0	0	0	0	0	0	0	0	0	1	0	0	0	0	1	0	0	0	0	0	0	0	0	0	0	0	0	0	0	0	0	0	0	0	1	1	1	1
617		H2-18-0083-1	30 (CC30)	died	no MRSA	0	0	0	0	0	0	0	0	0	0	0	0	0	0	0	0	1	0	0	0	1	0	0	0	0	0	0	0	0	0	0	0	0	0	0	0	0	0	0	0	1	1	1	1
618		H5-17-0296-1	30 (CC30)	died	no MRSA	0	0	0	1	0	0	0	0	0	0	0	0	0	0	0	1	1	0	0	0	1	0	0	0	0	0	0	0	0	0	0	0	0	0	0	0	0	0	0	0	1	1	1	1
619		H2-18-0348-1	30 (CC30)	died	no MRSA	0	0	0	0	0	0	0	0	0	0	0	0	0	0	0	0	0	0	0	0	0	0	0	0	0	0	0	0	0	0	0	0	0	0	0	0	0	0	0	0	1	1	1	1
620		H2-17-0373-1	30 (CC30)	survived	no MRSA	0	0	0	0	0	0	0	0	0	0	0	0	0	0	0	0	0	0	0	0	1	0	0	0	0	0	0	0	0	0	0	0	0	0	0	0	0	0	0	0	1	1	0	1
621		H5-20-0229-1	30 (CC30)	survived	no MRSA	0	0	0	0	0	0	0	0	0	0	0	0	0	0	0	0	0	0	0	0	1	0	0	0	0	0	0	0	0	0	0	0	0	0	0	0	0	0	0	0	1	1	1	1
622		H5-17-0253-1	30 (CC30)	survived	no MRSA	1	0	0	0	0	0	0	0	0	0	0	0	0	0	0	0	0	0	0	0	1	0	0	0	0	0	0	0	0	0	0	0	0	0	0	0	0	0	0	0	0	1	1	1
623		H2-18-0452-1	30 (CC30)	died	no MRSA	0	0	0	0	0	0	0	0	0	0	0	0	0	0	0	0	1	0	0	0	1	0	0	0	0	0	0	0	0	0	0	0	0	0	0	0	0	0	0	0	1	1	1	1
624		H2-17-0394-1	30 (CC30)	survived	no MRSA	0	0	0	0	0	0	0	0	0	0	0	0	0	0	0	0	1	0	0	0	0	0	0	0	0	0	0	0	0	0	0	0	0	0	0	0	0	0	0	0	1	1	1	1
625		H5-17-0277-1	30 (CC30)	survived	no MRSA	0	0	0	0	0	0	0	0	0	0	0	0	0	0	0	1	1	0	0	0	1	0	0	0	0	0	0	0	0	0	0	0	0	0	0	0	0	0	0	0	1	1	1	1
626		H2-17-0473-1	30 (CC30)	survived	no MRSA	0	0	0	0	0	0	0	0	0	0	0	0	0	0	0	0	0	0	0	0	1	0	0	0	0	0	0	0	0	0	0	0	0	0	0	0	0	0	0	0	1	1	1	1
627		H5-20-0260-1	30 (CC30)	died	no MRSA	0	0	0	0	0	0	0	0	0	0	0	0	0	0	0	0	0	0	0	0	1	0	0	0	0	0	0	0	0	0	0	0	0	0	0	0	0	0	0	0	1	1	1	1
628		H2-18-0479-1	30 (CC30)	survived	no MRSA	0	0	0	0	0	0	0	0	0	0	0	0	0	0	0	1	1	0	0	0	1	0	0	0	0	0	0	0	0	0	0	0	0	0	0	0	0	0	0	0	0	1	1	1
629		H5-20-0200-1	30 (CC30)	died	no MRSA	0	0	0	0	0	0	0	0	0	0	0	0	0	0	0	1	1	0	0	0	1	0	0	0	0	0	0	0	0	0	0	0	0	0	0	0	0	0	0	0	1	1	1	1
630		H5-18-0291-1	30 (CC30)	survived	no MRSA	0	0	0	0	0	0	0	0	0	0	0	0	0	0	0	0	0	0	0	0	1	0	0	0	0	0	0	0	0	0	0	0	0	0	0	0	0	0	0	0	1	1	1	1
631		H2-18-0247-1	30 (CC30)	survived	no MRSA	0	0	0	0	0	0	0	0	0	0	0	0	0	0	0	0	1	0	0	0	0	0	0	0	0	0	0	0	0	0	0	0	0	0	0	0	0	0	0	0	1	1	1	1
632		H2-17-0416-1	30 (CC30)	survived	no MRSA	0	0	0	0	0	0	0	0	0	0	0	0	0	0	0	0	0	0	0	0	0	0	0	0	0	0	0	0	0	0	0	0	0	0	0	0	0	0	0	0	1	1	1	1
633		H5-19-0376-1	30 (CC30)	survived	no MRSA	0	0	0	0	0	0	0	0	0	0	0	0	0	0	0	1	0	0	0	0	1	0	0	0	0	0	0	0	0	0	0	0	0	0	0	0	0	0	0	0	1	1	1	1
634		H3-17-0337-1	30 (CC30)	died	no MRSA	0	0	0	0	0	0	0	0	0	0	0	0	0	0	0	0	0	0	0	0	1	0	0	0	0	0	0	0	0	0	0	0	0	0	0	0	0	0	0	0	1	1	1	1
635		H2-20-0307-1	30 (CC30)	survived	no MRSA	0	0	0	0	0	0	0	0	0	0	0	0	0	0	0	0	0	0	0	0	1	0	0	0	0	0	0	0	0	0	0	0	0	0	0	0	0	0	0	0	1	1	1	1
636		H2-18-0488-1	30 (CC30)	died	no MRSA	0	0	0	0	0	0	0	0	0	0	0	0	0	0	0	1	1	0	0	0	1	0	0	0	0	0	0	0	0	0	0	0	0	0	0	0	0	0	0	0	1	1	1	1
637		H5-20-0253-1	30 (CC30)	survived	no MRSA	0	0	0	0	0	0	0	0	0	0	0	0	0	0	0	1	1	0	0	0	1	0	0	0	0	0	0	0	0	0	0	0	0	0	0	0	0	0	0	0	1	1	1	0
638		H4-17-0425-1	30 (CC30)	died	no MRSA	0	0	0	0	0	0	0	0	0	0	0	0	0	0	0	0	0	0	0	0	1	0	0	0	0	0	0	0	0	0	0	0	0	0	0	0	0	0	0	0	1	1	1	1
639		H5-17-0121-1	30 (CC30)	survived	no MRSA	0	0	0	0	0	0	0	0	0	0	0	0	0	0	0	1	1	0	0	0	1	0	0	0	0	0	0	0	0	0	0	0	0	0	0	0	0	0	0	0	1	1	1	1
640		H5-20-0309-1	30 (CC30)	survived	no MRSA	0	0	0	0	0	0	0	0	0	0	0	0	0	0	0	1	1	0	0	0	1	0	0	0	0	0	0	0	0	0	0	0	0	0	0	0	0	0	0	0	1	1	1	1
641		H2-18-0198-1	-	survived	no MRSA	0	0	0	0	0	0	0	0	0	0	0	0	0	0	0	0	1	0	0	0	1	0	0	0	0	0	0	0	0	0	0	0	0	0	0	0	0	0	0	0	1	1	1	1
642		H2-20-0599-1	30 (CC30)	died	no MRSA	0	0	0	0	0	0	0	0	0	0	0	0	0	0	0	1	1	0	0	0	1	0	0	0	0	0	0	0	0	0	0	0	0	0	0	0	0	0	0	0	1	1	1	1
643		H2-20-0287-1	30 (CC30)	survived	no MRSA	0	0	0	0	0	0	0	0	0	0	0	0	0	0	0	1	1	0	0	0	1	0	0	0	0	0	0	0	0	0	0	0	0	0	0	0	0	0	0	0	1	1	1	1
[truncated: 28 more columns]

## Sheet: localisation_on_contig
order phylogeny		sample	MLST type (Clonal Complex)	survival state	MRSA status	UniRef100_A0A4U2KP01	UniRef100_D2J5W1	UniRef100_A0A6C0L8I7	UniRef100_A0A658X0A3	UniRef100_D2J5X3	UniRef100_D2J5X0	UniRef100_D2J5W0	UniRef100_D2J5Y9	UniRef100_Q8VVU3	UniRef100_D2J5Z4	UniRef100_D2J5W8	UniRef100_O85217	UniRef100_D2J5X2	UniRef100_B2ZYZ2	UniRef100_A0A9Q4UZ40	UniRef100_A0A9Q4V4N4	UniRef100_UPI0002CA386D	UniRef100_C4TFC1	UniRef100_A0A2R4A9A6	UniRef100_A7X1P3	UniRef100_A0A7U7EV04	UniRef100_O80068	UniRef100_T1Y821	UniRef100_A0A9P1QL98	UniRef100_E4PYM0	UniRef100_B6V395	UniRef100_A7X388	UniRef100_P68799	UniRef100_A6U0P1	UniRef100_A0A3M7WI19	UniRef100_A0A0D1JN68	UniRef100_V5YRT8	UniRef100_A0A2X3WAT2	UniRef100_Q2G0K7	UniRef100_A0A0D6GEK5	UniRef100_W8TRM3	UniRef100_Q2FIJ2	UniRef100_X5EHN8	UniRef100_W8U2Z7	UniRef100_Q99SA3	UniRef100_W8UXA3	UniRef100_W8TRN2	UniRef100_W8TTH4	UniRef100_Q93PN3
1	#VALUE!	H2-17-0159-1	72	survived	no MRSA	0	0	0	0	0	0	0	0	0	0	0	0	0	0	0	0	0	(contig_1 - 424186:424527)	0	(contig_5 - 147361:149064)	0	0	(contig_14 - 33826:34629)	(contig_1 - 308412:309134)	0	(contig_1 - 435368:435688)	(contig_4 - 280618:281904)	0	0	0	0	(contig_2 - 253181:253981)	0	0	0	0	(contig_3 - 87569:87991)	(contig_1 - 125047:126015)	(contig_1 - 361874:362695)	0	0	0	0	0
2		H5-19-0368-1	72	survived	MRSA	0	0	0	0	0	0	0	0	0	0	0	0	0	0	0	0	0	0	0	(contig_4 - 99998:101701)	0	0	(contig_18 - 33872:34675)	(contig_7 - 110280:111002)	0	0	(contig_1 - 280671:281957)	0	0	0	0	(contig_8 - 15421:16221)	0	0	0	0	(contig_10 - 11770:12192)	(contig_3 - 125230:126198)	(contig_7 - 56842:57663)	(contig_17 - 28136:29674)	0	0	(contig_7 - 81808:82356)	(contig_9 - 66559:67470)
3		H2-20-0257-1	72	died	no MRSA	0	0	0	0	0	0	0	0	0	0	0	0	0	0	0	0	0	0	0	(contig_3 - 100024:101727)	0	0	(contig_22 - 4267:5070)	(contig_11 - 36282:37004)	0	0	(contig_7 - 12714:14000)	0	0	0	0	(contig_5 - 64250:65050)	0	0	0	0	(contig_1 - 219183:219605)	(contig_19 - 24682:25650)	(contig_21 - 42994:43815)	(contig_20 - 16485:18023)	0	0	(contig_11 - 65017:65565)	(contig_6 - 38408:39319)
4		H5-17-0214-1	72	died	no MRSA	0	0	0	0	0	0	0	0	0	0	0	0	0	0	0	0	0	(contig_4 - 123684:124025)	0	(contig_1 - 603579:605282)	0	0	(contig_10 - 33871:34674)	(contig_2 - 671529:672251)	0	(contig_4 - 112523:112843)	(contig_3 - 280314:281600)	0	0	0	0	(contig_2 - 435403:436203)	0	0	0	0	(contig_1 - 219014:219436)	(contig_6 - 5205:6173)	(contig_2 - 617924:618745)	(contig_9 - 28258:29796)	0	0	(contig_2 - 642968:643516)	(contig_4 - 152458:153369)
5		H4-18-0333-1	72	survived	no MRSA	0	0	0	0	0	0	0	0	0	0	0	0	0	0	0	0	0	0	0	(contig_4 - 189158:190861)	0	0	(contig_13 - 33594:34397)	(contig_5 - 36306:37028)	(contig_17 - 744:1361)	0	(contig_2 - 280331:281617)	0	0	0	0	(contig_1 - 435420:436220)	0	0	0	0	(contig_3 - 194771:195193)	(contig_8 - 5206:6174)	(contig_5 - 89812:90633)	(contig_12 - 16485:18023)	0	0	(contig_5 - 65041:65589)	(contig_6 - 5748:6659)
6		H5-18-0148-1	12	survived	no MRSA	0	0	0	0	0	0	0	0	0	0	0	0	0	0	0	0	0	0	0	0	0	0	0	0	0	0	0	0	0	0	(contig_2 - 457098:457763)	0	0	(contig_3 - 14973:15605)	0	0	(contig_1 - 12182:12604)	0	0	0	0	0	0	0
7		H5-20-0217-1	12	survived	no MRSA	0	0	0	0	0	0	0	0	0	0	0	0	0	0	0	0	0	0	(contig_13 - 173:313)	0	0	0	0	0	(contig_13 - 861:1478)	0	0	0	0	0	(contig_2 - 7927:8592)	0	0	(contig_1 - 1288794:1289426)	0	0	(contig_1 - 1031063:1031485)	0	(contig_2 - 60329:61150)	0	0	0	0	0
8		H2-18-0222-1	-	survived	no MRSA	0	0	0	0	0	0	0	0	0	0	0	0	0	0	0	0	0	0	0	0	0	0	0	0	0	0	0	0	0	0	(contig_2 - 142446:143111)	0	0	(contig_7 - 6804:7436)	0	0	(contig_4 - 262484:262906)	0	(contig_2 - 89890:90711)	0	0	0	0	0
9		H2-20-0671-1	4022	survived	no MRSA	0	0	0	(contig_1 - 1015317:1016048)	0	0	0	0	0	0	0	0	0	0	0	0	0	0	(contig_12 - 173:313)	0	(contig_1 - 1003089:1003160)	(contig_1 - 1017221:1018426)	0	0	(contig_12 - 861:1478)	0	0	0	0	0	(contig_2 - 142491:143156)	0	0	(contig_1 - 58699:59331)	0	0	(contig_1 - 316842:317264)	0	(contig_2 - 89932:90753)	0	0	0	0	0
10		H2-17-0658-1	12	survived	no MRSA	0	0	0	0	0	0	0	0	0	0	0	0	0	0	0	0	0	0	0	0	0	0	0	0	0	0	0	0	0	0	(contig_6 - 142333:142998)	0	0	(contig_2 - 6930:7562)	0	0	(contig_2 - 249594:250016)	0	(contig_6 - 89775:90596)	0	0	0	0	0
11		H5-18-0299-1	-	survived	no MRSA	0	0	0	0	0	0	0	0	0	0	0	0	0	0	0	0	0	0	(contig_30 - 1230:1370)	0	0	0	0	0	(contig_30 - 65:682)	0	0	0	0	0	(contig_1 - 173080:173745)	0	0	(contig_2 - 58467:59099)	0	0	0	0	(contig_1 - 225482:226303)	0	0	0	0	0
12		H3-17-0179-1	12	survived	no MRSA	0	0	0	0	0	0	0	0	0	0	0	0	0	0	0	0	0	0	0	0	0	0	0	0	0	0	0	0	0	0	(contig_2 - 456484:457149)	0	0	0	0	0	0	0	(contig_2 - 403926:404747)	0	0	0	0	0
13		H4-18-0426-1	12	survived	no MRSA	0	0	0	0	0	0	0	0	0	0	0	0	0	0	0	0	0	0	0	0	0	0	0	0	0	0	0	0	0	0	(contig_7 - 142389:143054)	0	0	0	0	0	0	0	(contig_7 - 89837:90658)	0	0	0	0	0
14		H2-18-0026-1	12	survived	no MRSA	0	0	0	0	0	0	0	0	0	0	0	0	0	0	0	0	0	(contig_4 - 86659:87000)	(contig_16 - 1261:1401)	0	0	0	0	0	(contig_16 - 97:714)	(contig_4 - 97841:98161)	0	0	0	0	(contig_2 - 133155:133820)	0	0	(contig_4 - 58643:59275)	0	0	0	0	(contig_2 - 80597:81418)	0	0	0	0	0
15		H5-19-0320-1	5732	survived	no MRSA	0	0	0	0	0	0	0	0	0	0	0	0	0	0	0	0	0	0	0	0	0	0	(contig_16 - 33545:34348)	(contig_5 - 36295:37017)	0	0	0	0	0	(contig_8 - 69072:69458)	(contig_5 - 141663:142328)	(contig_2 - 264202:265002)	0	(contig_3 - 10525:11157)	(contig_4 - 239293:239667)	(contig_11 - 32418:32831)	(contig_3 - 248595:249017)	(contig_9 - 137403:138371)	(contig_5 - 89231:90052)	(contig_11 - 16744:18282)	(contig_1 - 222196:223557)	(contig_3 - 51686:52192)	0	(contig_14 - 20416:21327)
16		H4-18-0298-1	6	died	no MRSA	0	0	0	0	0	0	0	0	0	0	0	0	0	0	0	0	0	0	0	0	0	0	(contig_15 - 4353:5156)	0	0	0	0	0	0	(contig_8 - 69075:69461)	(contig_9 - 141659:142324)	(contig_1 - 264188:264988)	0	(contig_4 - 281909:282541)	(contig_3 - 239566:239940)	(contig_12 - 75475:75888)	(contig_4 - 43387:43809)	(contig_6 - 109:1077)	(contig_9 - 89227:90048)	(contig_12 - 90024:91562)	(contig_2 - 108043:109404)	(contig_4 - 240498:241004)	(contig_9 - 65081:65629)	(contig_13 - 38596:39507)
17		H1-17-0647-1	6	survived	no MRSA	0	(contig_14 - 10004:10681)	0	0	(contig_14 - 20781:21392)	(contig_14 - 17588:18367)	(contig_14 - 9114:9293)	(contig_14 - 5094:5282)	(contig_14 - 7711:8481)	(contig_14 - 8585:8986)	(contig_14 - 16368:16535)	(contig_14 - 16692:17498)	(contig_14 - 20009:20428)	0	0	0	0	0	(contig_14 - 3402:3542)	0	0	0	(contig_13 - 3398:4201)	(contig_1 - 502606:503328)	(contig_14 - 4090:4707)	0	0	0	0	(contig_11 - 77432:77818)	(contig_1 - 397361:398026)	(contig_1 - 263557:264357)	0	(contig_2 - 10632:11264)	(contig_2 - 288700:289074)	(contig_10 - 75476:75889)	(contig_2 - 249572:249994)	(contig_6 - 109:1077)	(contig_1 - 449638:450459)	(contig_10 - 90025:91563)	(contig_8 - 107928:109289)	(contig_2 - 52169:52675)	(contig_1 - 473989:474537)	(contig_5 - 38395:39306)
18		H2-18-0104-1	6	survived	no MRSA	0	0	0	0	0	0	0	0	0	0	0	0	0	0	0	0	0	0	0	0	0	0	(contig_17 - 33595:34398)	(contig_8 - 109430:110152)	0	0	0	0	0	(contig_7 - 77325:77711)	(contig_8 - 4156:4821)	(contig_3 - 42296:43096)	0	(contig_1 - 6875:7507)	(contig_1 - 284945:285319)	(contig_11 - 75475:75888)	(contig_1 - 245817:246239)	(contig_5 - 170090:171058)	(contig_8 - 56433:57254)	(contig_11 - 90024:91562)	(contig_2 - 278795:280156)	(contig_1 - 48413:48919)	(contig_8 - 80853:81401)	(contig_16 - 13846:14757)
19		H5-18-0309-1	6	died	no MRSA	0	0	0	0	0	0	0	0	0	0	0	0	0	0	0	0	0	0	0	0	0	0	(contig_12 - 3398:4201)	(contig_11 - 34550:35272)	0	0	0	0	0	(contig_8 - 69036:69422)	(contig_9 - 55644:56309)	(contig_3 - 264396:265196)	0	(contig_1 - 517192:517824)	(contig_1 - 239436:239810)	(contig_10 - 31811:32224)	(contig_1 - 278516:278938)	(contig_5 - 108:1076)	(contig_9 - 107921:108742)	(contig_10 - 16137:17675)	(contig_2 - 223762:225123)	(contig_1 - 475781:476287)	(contig_11 - 5934:6482)	(contig_6 - 38367:39278)
20		H2-20-0612-1	6	survived	no MRSA	0	0	0	0	0	0	0	0	0	0	0	0	0	0	0	0	0	0	0	0	0	0	(contig_17 - 33791:34594)	(contig_8 - 36290:37012)	0	0	0	0	0	(contig_13 - 69075:69461)	(contig_8 - 141585:142250)	(contig_2 - 264381:265181)	0	(contig_11 - 6899:7531)	(contig_1 - 239672:240046)	(contig_10 - 75583:75996)	(contig_1 - 278752:279174)	(contig_7 - 170090:171058)	(contig_8 - 89152:89973)	(contig_10 - 90132:91670)	(contig_3 - 90741:92102)	(contig_11 - 48436:48942)	(contig_8 - 65080:65628)	(contig_6 - 131723:132634)
21		H2-17-0619-1	6	survived	no MRSA	0	0	0	0	0	0	0	0	0	0	0	0	0	0	0	0	0	0	0	0	0	0	(contig_18 - 33595:34398)	(contig_8 - 36289:37011)	0	0	0	0	0	(contig_7 - 69076:69462)	(contig_8 - 141658:142323)	(contig_2 - 265915:266715)	0	0	(contig_1 - 239737:240111)	(contig_10 - 75475:75888)	(contig_1 - 278817:279239)	(contig_5 - 109:1077)	(contig_8 - 89225:90046)	0	(contig_4 - 107929:109290)	(contig_1 - 476213:476719)	(contig_8 - 65079:65627)	(contig_14 - 38596:39507)
22		H2-17-0175-1	6	survived	no MRSA	0	0	0	0	0	0	0	0	0	0	0	0	0	0	0	0	0	0	0	0	0	0	0	(contig_7 - 32892:33614)	0	0	0	0	0	(contig_6 - 69013:69399)	(contig_7 - 138192:138857)	(contig_2 - 195306:196106)	0	(contig_1 - 10485:11117)	(contig_1 - 288344:288718)	(contig_9 - 32359:32772)	(contig_1 - 249216:249638)	(contig_17 - 109:1077)	(contig_7 - 85759:86580)	(contig_9 - 16685:18223)	(contig_3 - 195310:196671)	(contig_1 - 52022:52528)	(contig_7 - 61682:62230)	(contig_11 - 38596:39507)
23		H2-18-0020-1	6	survived	no MRSA	0	0	0	0	0	0	0	0	0	0	0	0	0	0	0	0	0	0	0	0	0	0	(contig_18 - 33595:34398)	(contig_15 - 34550:35272)	0	0	0	0	0	(contig_6 - 77202:77588)	(contig_14 - 69792:70457)	(contig_2 - 265881:266681)	0	(contig_3 - 10553:11185)	(contig_3 - 288252:288626)	(contig_8 - 32359:32772)	(contig_3 - 249124:249546)	(contig_17 - 44814:45782)	(contig_14 - 17359:18180)	(contig_8 - 16685:18223)	(contig_1 - 223335:224696)	(contig_3 - 51908:52414)	(contig_15 - 5934:6482)	(contig_10 - 38596:39507)
24		H2-17-0223-1	6	survived	no MRSA	0	0	0	0	0	0	0	0	0	0	0	0	0	0	0	0	0	0	0	0	0	0	(contig_16 - 33595:34398)	(contig_14 - 34550:35272)	0	0	0	0	0	(contig_7 - 77261:77647)	(contig_8 - 55836:56501)	(contig_1 - 478095:478895)	0	(contig_1 - 337990:338622)	(contig_1 - 60567:60941)	(contig_10 - 32418:32831)	(contig_1 - 99647:100069)	(contig_5 - 169850:170818)	(contig_8 - 108113:108934)	(contig_10 - 16744:18282)	(contig_3 - 118225:119586)	(contig_1 - 296640:297146)	(contig_14 - 5934:6482)	(contig_11 - 38395:39306)
25		H1-18-0328-1	789	survived	no MRSA	0	0	0	0	0	0	0	0	0	0	0	0	0	0	0	0	0	0	0	0	0	0	0	0	0	0	0	0	0	0	0	0	0	0	0	0	0	0	0	(contig_7 - 16473:18011)	0	0	(contig_5 - 65659:66207)	0
26		H2-18-0600-1	7	died	no MRSA	0	0	0	0	0	0	0	0	0	0	0	0	0	0	0	0	0	0	0	0	0	0	0	0	0	0	0	0	0	0	0	0	0	0	0	0	0	0	0	(contig_9 - 91516:93054)	(contig_1 - 41200:42561)	0	(contig_8 - 65758:66306)	(contig_6 - 38566:39477)
27		H4-17-0351-1	7	survived	no MRSA	0	0	0	0	0	0	0	0	0	0	0	0	0	0	0	0	0	0	0	0	0	0	0	0	0	0	0	0	0	0	0	0	0	0	0	0	0	0	0	(contig_6 - 91516:93054)	(contig_1 - 274584:275945)	0	(contig_2 - 232243:232791)	(contig_5 - 38574:39485)
28		H1-18-0343-1	7	survived	no MRSA	0	0	0	0	0	0	0	0	0	0	0	0	0	(contig_11 - 32744:33109)	0	0	0	0	0	0	0	0	0	0	0	0	0	0	0	0	0	0	0	0	0	0	0	0	0	(contig_8 - 91516:93054)	(contig_2 - 527669:529030)	0	(contig_1 - 65798:66346)	(contig_10 - 38574:39485)
29		H2-20-0654-1	7	died	no MRSA	0	0	0	0	0	0	0	0	0	0	0	0	0	0	0	0	0	0	0	0	0	0	0	0	0	0	0	0	0	0	0	0	0	0	0	0	0	0	0	(contig_9 - 91427:92965)	(contig_4 - 14300:15661)	0	(contig_2 - 30816:31364)	(contig_11 - 62470:63381)
30		H5-18-0276-1	7	survived	no MRSA	0	0	0	0	0	0	0	0	0	0	0	0	0	0	0	0	0	0	0	0	0	0	0	0	0	0	0	0	0	0	0	0	0	0	0	0	0	0	0	(contig_9 - 16474:18012)	0	0	(contig_7 - 65697:66245)	(contig_8 - 88036:88947)
31		H5-17-0105-1	7	survived	no MRSA	0	0	0	0	0	0	0	0	0	0	0	0	0	0	0	0	0	0	0	0	0	0	0	0	0	0	0	0	0	0	0	0	0	0	0	0	0	0	0	(contig_8 - 16474:18012)	(contig_1 - 274396:275757)	0	0	(contig_7 - 131539:132450)
32		H3-17-0211-1	7	survived	no MRSA	0	0	0	0	0	0	0	0	0	0	0	0	0	0	0	0	0	0	0	0	0	0	0	0	0	0	0	0	0	0	0	0	0	0	0	0	0	0	0	(contig_8 - 91512:93050)	(contig_3 - 274546:275907)	0	(contig_7 - 81140:81688)	(contig_6 - 38574:39485)
33		H4-17-0239-1	7	died	no MRSA	0	0	0	0	0	0	0	0	0	0	0	0	0	0	0	0	0	0	0	0	0	0	0	0	0	0	0	0	0	0	0	0	0	0	0	0	0	0	0	(contig_10 - 91354:92892)	(contig_3 - 14300:15661)	0	(contig_2 - 30816:31364)	(contig_12 - 22152:23063)
34		H3-17-0222-1	7	survived	no MRSA	0	0	0	0	0	0	0	0	0	0	0	0	0	0	0	0	0	0	0	0	0	0	0	0	0	0	0	0	0	0	0	0	0	0	0	0	0	0	0	(contig_9 - 91427:92965)	(contig_2 - 204342:205703)	0	(contig_1 - 64283:64831)	(contig_10 - 51542:52453)
35		H1-17-0272-1	7	survived	no MRSA	0	0	0	0	0	0	0	0	0	0	0	0	0	0	0	0	0	0	0	0	0	0	0	0	0	0	0	0	0	0	0	0	0	0	0	0	0	0	0	(contig_6 - 16632:18170)	(contig_1 - 1031316:1032677)	0	(contig_4 - 232261:232809)	0
36		H2-20-0454-1	7	survived	no MRSA	0	0	0	0	0	0	0	0	0	0	0	0	0	0	0	0	0	0	0	0	0	0	0	0	0	0	0	0	0	0	0	0	0	0	0	0	0	0	0	(contig_6 - 16474:18012)	(contig_2 - 234806:236167)	0	(contig_1 - 384729:385277)	(contig_8 - 51570:52481)
37		H1-17-0502-1	7	survived	no MRSA	0	0	0	0	0	0	0	0	0	0	0	0	0	0	0	0	0	0	0	0	0	0	0	0	0	0	0	0	0	0	0	0	0	0	0	0	0	0	0	(contig_7 - 16473:18011)	0	0	(contig_1 - 385194:385742)	(contig_6 - 131532:132443)
38		H2-20-0651-1	7	died	no MRSA	0	0	0	0	0	0	0	0	0	0	0	0	0	0	0	0	0	0	0	0	0	0	0	0	0	0	0	0	0	0	0	0	0	0	0	0	0	0	0	(contig_10 - 16631:18169)	(contig_1 - 219597:220958)	0	(contig_4 - 232261:232809)	(contig_5 - 38566:39477)
39		H2-20-0067-1	7	survived	no MRSA	0	0	0	0	0	0	0	0	0	0	0	0	0	0	0	0	0	0	0	0	0	0	0	0	0	0	0	0	0	0	0	0	0	0	0	0	0	0	0	(contig_7 - 91512:93050)	(contig_1 - 274336:275697)	0	(contig_4 - 65800:66348)	(contig_11 - 11996:12907)
40		H2-20-0421-1	7	died	no MRSA	0	0	0	0	0	0	0	0	0	0	0	0	0	0	0	0	0	0	0	0	0	0	0	0	0	0	0	0	0	0	0	0	0	0	0	0	0	0	0	(contig_8 - 16474:18012)	(contig_1 - 274141:275502)	0	(contig_3 - 65651:66199)	(contig_7 - 38566:39477)
41		H5-17-0255-1	7	survived	no MRSA	0	0	0	0	0	0	0	0	0	0	0	0	0	0	0	0	0	0	0	0	0	0	0	0	0	0	0	0	0	0	0	0	0	0	0	0	0	0	0	(contig_8 - 91516:93054)	(contig_2 - 217824:219185)	0	(contig_6 - 81057:81605)	(contig_13 - 6353:7264)
42		H2-20-0178-1	7	survived	no MRSA	0	0	0	0	0	0	0	0	0	0	0	0	0	0	0	0	0	0	0	0	0	0	0	0	0	0	0	0	0	0	0	0	0	0	0	0	0	0	0	(contig_7 - 16690:18228)	(contig_3 - 176862:178223)	0	(contig_1 - 65718:66266)	(contig_10 - 38566:39477)
43		H5-17-0233-1	7	died	no MRSA	0	0	0	0	0	0	0	0	0	0	0	0	0	0	0	0	0	0	0	0	0	0	0	0	0	0	0	0	0	0	0	0	0	0	0	0	0	0	0	(contig_7 - 91516:93054)	(contig_2 - 204451:205812)	0	(contig_1 - 640272:640820)	(contig_11 - 38528:39439)
44		H2-18-0490-1	7	survived	no MRSA	0	0	0	0	0	0	0	0	0	0	0	0	0	0	0	0	0	0	0	0	0	0	0	0	0	0	0	0	0	0	0	0	0	0	0	0	0	0	0	(contig_9 - 91427:92965)	(contig_2 - 201090:202451)	0	(contig_15 - 23449:23997)	(contig_10 - 38335:39246)
45		H2-18-0336-1	7	survived	no MRSA	0	0	0	0	0	0	0	0	0	0	0	0	0	0	0	0	0	0	0	0	0	0	0	0	0	0	0	0	0	0	0	0	0	0	0	0	0	0	0	(contig_14 - 16631:18169)	(contig_1 - 330828:332189)	0	(contig_5 - 95674:96222)	(contig_8 - 131534:132445)
46		H5-20-0390-1	7	died	no MRSA	0	0	0	0	0	0	0	0	0	0	0	0	0	0	0	0	0	0	0	0	0	0	0	0	0	0	0	0	0	0	0	0	0	0	0	0	0	0	0	(contig_9 - 91511:93049)	(contig_3 - 274830:276191)	0	(contig_1 - 639431:639979)	(contig_7 - 38566:39477)
47		H1-18-0092-1	7	survived	no MRSA	0	0	0	0	0	0	0	0	0	0	0	0	0	0	0	0	0	0	0	0	0	0	0	0	0	0	0	0	0	0	0	0	0	0	0	0	0	0	0	(contig_9 - 16324:17862)	(contig_4 - 274445:275806)	0	(contig_8 - 65797:66345)	(contig_7 - 38565:39476)
48		H1-18-0351-1	7	survived	no MRSA	0	0	0	0	0	0	0	0	0	0	0	0	0	0	0	0	0	0	0	0	0	0	0	0	0	0	0	0	0	0	0	0	0	0	0	0	0	0	0	(contig_9 - 91516:93054)	(contig_6 - 97566:98927)	0	(contig_1 - 640410:640958)	(contig_7 - 38566:39477)
49		H4-18-0495-1	7	survived	no MRSA	0	0	0	0	0	0	0	0	0	0	0	0	0	0	0	0	0	0	0	0	0	0	0	0	0	0	0	0	0	0	0	0	0	0	0	0	0	0	0	(contig_9 - 16474:18012)	(contig_1 - 41200:42561)	0	(contig_8 - 81059:81607)	(contig_6 - 38574:39485)
50		H5-18-0301-1	7	survived	no MRSA	0	0	0	0	0	0	0	0	0	0	0	0	0	0	0	0	0	0	0	0	0	0	0	0	0	0	0	0	0	0	0	0	0	0	0	0	0	0	0	0	(contig_11 - 3840:5201)	0	(contig_3 - 232287:232835)	(contig_10 - 62472:63383)
51		H2-18-0107-1	7	survived	no MRSA	0	0	0	0	0	0	0	0	0	0	0	0	0	0	0	0	0	0	0	0	0	0	0	0	0	0	0	0	0	0	0	0	0	0	0	0	0	0	0	(contig_8 - 16473:18011)	(contig_1 - 525105:526466)	0	(contig_5 - 56348:56896)	(contig_7 - 38566:39477)
52		H2-18-0404-1	7	died	no MRSA	0	0	0	0	0	0	0	0	0	0	0	0	0	0	0	0	0	0	0	0	0	0	0	0	0	0	0	0	0	0	0	0	0	0	0	0	0	0	0	(contig_10 - 16119:17657)	(contig_1 - 75277:76638)	0	(contig_17 - 23453:24001)	(contig_12 - 38333:39244)
53		H4-18-0089-1	7	died	no MRSA	0	0	0	0	0	0	0	0	0	0	0	0	0	0	0	0	0	0	0	0	0	0	0	0	0	0	0	0	0	0	0	0	0	0	0	0	0	0	0	(contig_8 - 16474:18012)	(contig_1 - 704298:705659)	0	(contig_5 - 232264:232812)	(contig_7 - 130952:131863)
54		H2-20-0054-1	7	survived	no MRSA	0	0	0	0	0	0	0	0	0	0	0	0	0	(contig_11 - 71259:71624)	0	0	0	0	0	0	0	0	0	0	0	0	0	0	0	0	0	0	0	0	0	0	0	0	0	(contig_10 - 16474:18012)	(contig_5 - 230844:232205)	0	(contig_4 - 65722:66270)	(contig_12 - 38566:39477)
55		H4-17-0185-1	7	survived	no MRSA	0	0	0	0	0	0	0	0	0	0	0	0	0	0	0	0	0	0	0	0	0	0	0	0	0	0	0	0	0	0	0	0	0	0	0	0	0	0	0	(contig_5 - 91515:93053)	(contig_1 - 1027078:1028439)	0	(contig_2 - 640444:640992)	(contig_4 - 130952:131863)
56		H2-20-0440-1	7	survived	no MRSA	0	0	0	0	0	0	0	0	0	0	0	0	0	0	0	0	0	0	0	0	0	0	0	0	0	0	0	0	0	0	0	0	0	0	0	0	0	0	0	(contig_10 - 16474:18012)	(contig_4 - 41035:42396)	0	(contig_9 - 80738:81286)	(contig_8 - 38574:39485)
57		H4-18-0118-1	7	survived	no MRSA	0	0	0	0	0	0	0	0	0	0	0	0	0	0	0	0	0	0	0	0	0	0	0	0	0	0	0	0	0	0	0	0	0	0	0	0	0	0	0	(contig_7 - 16474:18012)	(contig_1 - 493721:495082)	0	(contig_2 - 65695:66243)	(contig_6 - 38566:39477)
58		H2-20-0251-1	7	died	no MRSA	0	0	0	0	0	0	0	0	0	0	0	0	0	0	0	0	0	0	0	0	0	0	0	0	0	0	0	0	0	0	0	0	0	0	0	0	0	0	0	(contig_9 - 91556:93094)	(contig_3 - 204457:205818)	0	(contig_1 - 640462:641010)	0
59		H4-17-0174-1	7	survived	no MRSA	0	0	0	0	0	0	0	0	0	0	0	0	0	0	0	0	0	0	0	0	0	0	0	0	0	0	0	0	0	0	0	0	0	0	0	0	0	0	0	(contig_7 - 16473:18011)	(contig_1 - 788364:789725)	0	(contig_2 - 640462:641010)	(contig_6 - 130893:131804)
60		H5-17-0235-1	7	survived	no MRSA	0	0	0	0	0	0	0	0	0	0	0	0	0	0	0	0	0	0	0	0	0	0	0	0	0	0	0	0	0	0	0	0	0	0	0	0	0	0	0	(contig_5 - 16474:18012)	(contig_1 - 274466:275827)	0	(contig_2 - 640350:640898)	(contig_4 - 130952:131863)
61		H5-17-0180-1	7	survived	no MRSA	0	0	0	0	0	0	0	0	0	0	0	0	0	(contig_28 - 6204:6569)	0	0	0	0	0	0	0	0	0	0	0	0	0	0	0	0	0	0	0	0	0	0	0	0	0	(contig_10 - 16118:17656)	(contig_2 - 293817:295178)	0	(contig_7 - 64283:64831)	(contig_11 - 20851:21762)
62		H3-17-0297-1	7	survived	no MRSA	0	0	0	0	0	0	0	0	0	0	0	0	0	0	0	0	0	0	0	0	0	0	0	0	0	0	0	0	0	0	0	0	0	0	0	0	0	0	0	(contig_9 - 16474:18012)	(contig_4 - 214429:215790)	0	(contig_2 - 57409:57957)	(contig_7 - 131550:132461)
63		H2-17-0391-1	7	survived	no MRSA	0	0	0	0	0	0	0	0	0	0	0	0	0	0	0	0	0	0	0	0	0	0	0	0	0	0	0	0	0	0	0	0	0	0	0	0	0	0	0	(contig_7 - 91516:93054)	(contig_2 - 589303:590664)	0	(contig_1 - 640164:640712)	(contig_6 - 38566:39477)
64		H2-17-0390-1	7	survived	no MRSA	0	0	0	0	0	0	0	0	0	0	0	0	0	0	0	0	0	0	0	0	0	0	0	0	0	0	0	0	0	0	0	0	0	0	0	0	0	0	0	(contig_7 - 16474:18012)	(contig_1 - 41199:42560)	0	(contig_2 - 640164:640712)	(contig_6 - 38566:39477)
65		H2-17-0552-1	7	survived	no MRSA	0	0	0	0	0	0	0	0	0	0	0	0	0	0	0	0	0	0	0	0	0	0	0	0	0	0	0	0	0	0	0	0	0	0	0	0	0	0	0	0	(contig_1 - 493596:494957)	0	(contig_5 - 232265:232813)	(contig_7 - 38494:39405)
66		H2-18-0529-1	7	died	no MRSA	0	0	0	0	0	0	0	0	0	0	0	0	0	0	0	0	0	0	0	0	0	0	0	0	0	0	0	0	0	0	0	0	0	0	0	0	0	0	0	(contig_6 - 16473:18011)	(contig_1 - 1031400:1032761)	0	(contig_4 - 65760:66308)	(contig_5 - 38565:39476)
67		H2-18-0447-1	7	survived	no MRSA	0	0	0	0	0	0	0	0	0	0	0	0	0	0	0	0	0	0	0	0	0	0	0	0	0	0	0	0	0	0	0	0	0	0	0	0	0	0	0	(contig_8 - 16690:18228)	(contig_4 - 75595:76956)	0	(contig_1 - 640486:641034)	(contig_7 - 130895:131806)
68		H1-18-0093-1	7	survived	no MRSA	0	0	0	0	0	0	0	0	0	0	0	0	0	0	0	0	0	0	0	0	0	0	0	0	0	0	0	0	0	0	0	0	0	0	0	0	0	0	0	(contig_8 - 91516:93054)	(contig_2 - 493723:495084)	0	(contig_1 - 639849:640397)	(contig_6 - 130953:131864)
69		H2-20-0019-1	7	survived	no MRSA	0	0	0	0	0	0	0	0	0	0	0	0	0	0	0	0	0	0	0	0	0	0	0	0	0	0	0	0	0	0	0	0	0	0	0	0	0	0	0	(contig_8 - 16474:18012)	(contig_1 - 41205:42566)	0	(contig_4 - 65788:66336)	(contig_7 - 38566:39477)
70		H2-17-0604-1	7	survived	no MRSA	0	0	0	0	0	0	0	0	0	0	0	0	0	0	0	0	0	0	0	0	0	0	0	0	0	0	0	0	0	0	0	0	0	0	0	0	0	0	0	(contig_6 - 16474:18012)	(contig_1 - 1026514:1027875)	0	(contig_2 - 65754:66302)	0
71		H2-18-0108-1	7	survived	no MRSA	0	0	0	0	0	0	0	0	0	0	0	0	0	0	0	0	0	0	0	0	0	0	0	0	0	0	0	0	0	0	0	0	0	0	0	0	0	0	0	(contig_5 - 16474:18012)	(contig_1 - 1074966:1076327)	0	(contig_2 - 640470:641018)	(contig_3 - 130953:131864)
72		H4-18-0397-1	7	died	no MRSA	0	0	0	0	0	0	0	0	0	0	0	0	0	0	0	0	0	0	0	0	0	0	0	0	0	0	0	0	0	0	0	0	0	0	0	0	0	0	0	(contig_10 - 91516:93054)	(contig_6 - 41143:42504)	0	(contig_1 - 81059:81607)	(contig_5 - 130953:131864)
73		H2-17-0652-1	-	survived	no MRSA	0	0	0	0	0	0	0	0	0	0	0	0	0	0	0	0	0	0	0	0	0	0	0	0	0	0	0	0	0	0	0	0	0	0	0	0	0	0	0	0	(contig_1 - 274458:275819)	0	(contig_5 - 232153:232701)	(contig_6 - 130896:131807)
74		H4-18-0155-1	7	survived	no MRSA	0	0	0	0	0	0	0	0	0	0	0	0	0	0	0	0	0	0	0	0	0	0	0	0	0	0	0	0	0	0	0	0	0	0	0	0	0	0	0	(contig_9 - 91516:93054)	(contig_5 - 3840:5201)	0	(contig_8 - 64503:65051)	(contig_6 - 130945:131856)
75		H2-20-0557-1	7	survived	no MRSA	0	0	0	0	0	0	0	0	0	0	0	0	0	0	0	0	0	0	0	0	0	0	0	0	0	0	0	0	0	0	0	0	0	0	0	0	0	0	0	0	(contig_1 - 557016:558377)	0	(contig_2 - 384920:385468)	(contig_6 - 38566:39477)
76		H2-19-0744-1	7	died	no MRSA	0	0	0	0	0	0	0	0	0	0	0	0	0	0	0	0	0	0	0	0	0	0	0	0	0	0	0	0	0	0	0	0	0	0	0	0	0	0	0	(contig_7 - 16474:18012)	(contig_1 - 274459:275820)	0	(contig_6 - 65770:66318)	(contig_5 - 130953:131864)
77		H1-17-0334-1	7	survived	no MRSA	0	0	0	0	0	0	0	0	0	0	0	0	0	0	0	0	0	0	0	0	0	0	0	0	0	0	0	0	0	0	0	0	0	0	0	0	0	0	0	(contig_5 - 16480:18018)	(contig_1 - 274587:275948)	0	(contig_2 - 65740:66288)	(contig_4 - 131057:131968)
78		H1-18-0014-1	7	died	no MRSA	0	0	0	0	0	0	0	0	0	0	0	0	0	0	0	0	0	0	0	0	0	0	0	0	0	0	0	0	0	0	0	0	0	0	0	0	0	0	0	(contig_6 - 91516:93054)	(contig_1 - 41199:42560)	0	(contig_2 - 232264:232812)	(contig_5 - 38566:39477)
79		H4-18-0364-1	7	survived	no MRSA	0	0	0	0	0	0	0	0	0	0	0	0	0	0	0	0	0	0	0	0	0	0	0	0	0	0	0	0	0	0	0	0	0	0	0	0	0	0	0	(contig_6 - 16472:18010)	(contig_1 - 1027205:1028566)	0	(contig_2 - 85547:86095)	(contig_4 - 38488:39399)
80		H4-18-0473-1	-	survived	no MRSA	0	0	0	0	0	0	0	0	0	0	0	0	0	0	0	0	0	0	0	0	0	0	0	0	0	0	0	0	0	0	0	0	0	0	0	0	0	0	0	(contig_7 - 91516:93054)	(contig_2 - 41199:42560)	0	(contig_1 - 640163:640711)	(contig_6 - 130898:131809)
81		H4-18-0309-1	7	died	no MRSA	0	0	0	0	0	0	0	0	0	0	0	0	0	0	0	0	0	0	0	0	0	0	0	0	0	0	0	0	0	0	0	0	0	0	0	0	0	0	0	(contig_5 - 91516:93054)	(contig_1 - 1027483:1028844)	0	(contig_2 - 65796:66344)	(contig_4 - 130895:131806)
82		H2-17-0475-1	7	died	no MRSA	0	0	0	0	0	0	0	0	0	0	0	0	0	0	0	0	0	0	0	0	0	0	0	0	0	0	0	0	0	0	0	0	0	0	0	0	0	0	0	(contig_9 - 91427:92965)	(contig_3 - 127886:129247)	0	(contig_17 - 30816:31364)	(contig_13 - 22152:23063)
83		H4-17-0139-1	7	died	no MRSA	0	0	0	0	0	0	0	0	0	0	0	0	0	0	0	0	0	0	0	0	0	0	0	0	0	0	0	0	0	0	0	0	0	0	0	0	0	0	0	(contig_7 - 91516:93054)	(contig_3 - 274393:275754)	0	(contig_1 - 384738:385286)	(contig_6 - 38565:39476)
84		H4-17-0301-1	7	survived	no MRSA	0	0	0	0	0	0	0	0	0	0	0	0	0	0	0	0	0	0	0	0	0	0	0	0	0	0	0	0	0	0	0	0	0	0	0	0	0	0	0	(contig_9 - 16474:18012)	(contig_2 - 21880:23241)	0	(contig_7 - 56346:56894)	(contig_5 - 131553:132464)
85		H4-17-0230-1	7	survived	no MRSA	0	0	0	0	0	0	0	0	0	0	0	0	0	0	0	0	0	0	0	0	0	0	0	0	0	0	0	0	0	0	0	0	0	0	0	0	0	0	0	(contig_6 - 16473:18011)	(contig_1 - 589324:590685)	0	(contig_2 - 640312:640860)	(contig_5 - 88050:88961)
86		H2-18-0526-1	7	survived	no MRSA	0	0	0	0	0	0	0	0	0	0	0	0	0	(contig_2 - 419665:420030)	0	0	0	0	0	0	0	0	0	0	0	0	0	0	0	0	0	0	0	0	0	0	0	0	0	(contig_7 - 91516:93054)	(contig_1 - 41199:42560)	0	(contig_4 - 232264:232812)	(contig_6 - 130953:131864)
87		H2-17-0626-1	7	survived	no MRSA	0	0	0	0	0	0	0	0	0	0	0	0	0	0	0	0	0	0	0	0	0	0	0	0	0	0	0	0	0	0	0	0	0	0	0	0	0	0	0	(contig_7 - 91514:93052)	(contig_1 - 274439:275800)	0	(contig_5 - 57409:57957)	0
88		H2-20-0082-1	7	died	no MRSA	0	0	0	0	0	0	0	0	0	0	0	0	0	0	0	0	0	0	0	0	0	0	0	0	0	0	0	0	0	0	0	0	0	0	0	0	0	0	0	(contig_8 - 91515:93053)	(contig_1 - 274530:275891)	0	(contig_4 - 65758:66306)	(contig_7 - 38566:39477)
89		H4-18-0026-1	7	survived	no MRSA	0	0	0	0	0	0	0	0	0	0	0	0	0	0	0	0	0	0	0	0	0	0	0	0	0	0	0	0	0	0	0	0	0	0	0	0	0	0	0	(contig_9 - 14959:16497)	0	0	(contig_1 - 640460:641008)	(contig_8 - 38566:39477)
90		H2-20-0560-1	7	died	no MRSA	0	0	0	0	0	0	0	0	0	0	0	0	0	0	0	0	0	0	0	0	0	0	0	0	0	0	0	0	0	0	0	0	0	0	0	0	0	0	0	(contig_7 - 16474:18012)	(contig_1 - 281126:282487)	0	(contig_4 - 65801:66349)	(contig_6 - 130897:131808)
91		H2-19-0026-1	7	survived	no MRSA	0	0	0	0	0	0	0	0	0	0	0	0	0	0	0	0	0	0	0	0	0	0	0	0	0	0	0	0	0	0	0	0	0	0	0	0	0	0	0	(contig_6 - 91515:93053)	(contig_1 - 281266:282627)	0	(contig_4 - 232264:232812)	(contig_9 - 38566:39477)
92		H5-20-0275-1	7	survived	no MRSA	0	0	0	0	0	0	0	0	0	0	0	0	0	0	0	0	0	0	0	0	0	0	0	0	0	0	0	0	0	0	0	0	0	0	0	0	0	0	0	(contig_8 - 91473:93011)	(contig_2 - 91099:92460)	0	(contig_1 - 232261:232809)	(contig_7 - 10666:11577)
93		H2-17-0273-1	7	survived	no MRSA	0	0	0	0	0	0	0	0	0	0	0	0	0	(contig_6 - 188562:188927)	0	0	0	0	0	0	0	0	0	0	0	0	0	0	0	0	0	0	0	0	0	0	0	0	0	(contig_11 - 16117:17655)	(contig_4 - 203375:204736)	0	(contig_9 - 81010:81558)	(contig_18 - 22209:23120)
94		H2-17-0423-1	7	survived	no MRSA	0	0	0	0	0	0	0	0	0	0	0	0	0	0	0	0	0	0	0	0	0	0	0	0	0	0	0	0	0	0	0	0	0	0	0	0	0	0	0	(contig_8 - 91516:93054)	(contig_1 - 75470:76831)	0	(contig_6 - 65759:66307)	(contig_13 - 11726:12637)
95		H2-17-0234-1	7	survived	no MRSA	0	0	0	0	0	0	0	0	0	0	0	0	0	0	0	0	0	0	0	0	0	0	0	0	0	0	0	0	0	0	0	0	0	0	0	0	0	0	0	(contig_6 - 16474:18012)	(contig_1 - 41199:42560)	0	(contig_2 - 65797:66345)	(contig_5 - 38566:39477)
96		H5-17-0094-1	7	survived	no MRSA	0	0	0	0	0	0	0	0	0	0	0	0	0	0	0	0	0	0	0	0	0	0	0	0	0	0	0	0	0	0	0	0	0	0	0	0	0	0	0	(contig_7 - 16474:18012)	(contig_4 - 214446:215807)	0	(contig_3 - 384626:385174)	(contig_6 - 38566:39477)
97		H4-18-0103-1	7	died	no MRSA	0	0	0	0	0	0	0	0	0	0	0	0	0	0	0	0	0	0	0	0	0	0	0	0	0	0	0	0	0	0	0	0	0	0	0	0	0	0	0	(contig_7 - 91515:93053)	(contig_1 - 704456:705817)	0	(contig_4 - 65800:66348)	(contig_6 - 38566:39477)
98		H5-19-0318-1	7	survived	no MRSA	0	0	0	0	0	0	0	0	0	0	0	0	0	0	0	0	0	0	0	0	0	0	0	0	0	0	0	0	0	0	0	0	0	0	0	0	0	0	0	(contig_8 - 91556:93094)	(contig_2 - 273139:274500)	0	(contig_1 - 62153:62701)	(contig_7 - 38566:39477)
99		H2-18-0647-1	7	survived	no MRSA	0	0	0	0	0	0	0	0	0	0	0	0	0	0	0	0	0	0	0	0	0	0	0	0	0	0	0	0	0	0	0	0	0	0	0	0	0	0	0	(contig_6 - 16474:18012)	(contig_1 - 274582:275943)	0	(contig_2 - 640409:640957)	(contig_5 - 38566:39477)
100		H2-18-0090-1	7	survived	no MRSA	0	0	0	0	0	0	0	0	0	0	0	0	0	0	0	0	0	0	0	0	0	0	0	0	0	(contig_4 - 61430:61750)	0	0	0	0	0	0	0	0	0	0	0	0	0	(contig_10 - 16474:18012)	(contig_6 - 204456:205817)	0	(contig_4 - 74199:74747)	(contig_8 - 87996:88907)
101		H5-18-0070-1	672	survived	no MRSA	0	0	0	0	0	0	0	0	0	0	0	0	0	0	0	0	0	(contig_10 - 96137:96478)	0	0	0	0	0	(contig_9 - 114285:115007)	0	(contig_10 - 84970:85290)	0	0	0	0	(contig_9 - 8324:8989)	0	0	0	0	0	(contig_2 - 67103:67525)	0	(contig_9 - 60617:61438)	0	(contig_1 - 141564:142925)	0	(contig_9 - 85603:86151)	0
102		H4-17-0433-1	672	survived	no MRSA	0	0	0	0	0	0	0	0	0	0	0	0	0	0	0	0	0	0	0	0	0	0	0	(contig_1 - 37778:38500)	0	0	0	0	0	0	0	0	0	0	0	0	(contig_21 - 4106:4528)	0	(contig_1 - 91278:92099)	0	(contig_3 - 18489:19850)	0	(contig_1 - 66634:67182)	0
103		H2-17-0445-1	25	survived	no MRSA	0	0	0	0	0	0	0	0	0	0	0	0	0	0	0	0	0	0	0	0	0	0	0	0	0	0	0	0	0	0	0	0	(contig_1 - 778278:778700)	(contig_3 - 592236:592868)	(contig_3 - 306449:306823)	(contig_5 - 75277:75690)	0	(contig_1 - 807534:808502)	(contig_1 - 573329:574150)	(contig_5 - 89770:91308)	0	0	(contig_1 - 598061:598609)	(contig_4 - 130355:131266)
104		H5-18-0044-1	25	survived	no MRSA	0	0	0	0	0	0	0	0	0	0	0	0	0	0	0	0	0	(contig_6 - 100485:100826)	0	0	0	0	0	0	(contig_13 - 10049:10666)	(contig_6 - 89324:89644)	0	0	0	0	0	0	(contig_3 - 264027:264449)	(contig_5 - 6847:7479)	(contig_1 - 525565:525939)	(contig_7 - 75235:75648)	0	(contig_3 - 293283:294251)	(contig_3 - 57559:58380)	(contig_7 - 89728:91266)	0	0	(contig_3 - 82291:82839)	(contig_6 - 39145:40056)
105		H4-18-0135-1	25	survived	no MRSA	0	0	0	0	0	0	0	0	0	0	0	0	0	0	0	0	0	0	0	0	(contig_12 - 11715:11786)	0	0	0	(contig_16 - 1590:2207)	0	0	0	0	0	0	0	(contig_3 - 186824:187246)	(contig_1 - 6807:7439)	(contig_1 - 306316:306690)	(contig_6 - 75227:75640)	0	(contig_3 - 157022:157990)	(contig_5 - 113808:114629)	(contig_6 - 89720:91258)	0	0	(contig_5 - 138540:139088)	(contig_10 - 7453:8364)
106		H4-18-0400-1	25	survived	no MRSA	0	0	0	0	0	0	0	0	0	0	0	0	0	0	0	0	0	0	0	0	(contig_2 - 11383:11454)	(contig_3 - 95:1300)	0	0	0	0	0	0	0	0	0	0	(contig_1 - 211458:211880)	(contig_4 - 11230:11862)	(contig_2 - 657719:658093)	(contig_5 - 32381:32794)	0	(contig_1 - 181656:182624)	(contig_1 - 416572:417393)	(contig_5 - 16763:18301)	0	0	(contig_1 - 392113:392661)	(contig_9 - 7524:8435)
107		H4-18-0240-1	-	survived	no MRSA	0	0	0	0	0	0	0	0	0	0	0	0	0	0	0	0	0	0	0	0	0	0	0	0	0	0	0	0	0	0	0	0	(contig_2 - 211538:211960)	(contig_4 - 239869:240501)	(contig_1 - 937619:937993)	(contig_12 - 1821:2234)	0	(contig_2 - 181736:182704)	(contig_2 - 416776:417597)	(contig_12 - 16314:17852)	0	0	(contig_2 - 392317:392865)	(contig_8 - 13426:14337)
108		H1-18-0575-1	25	died	no MRSA	(contig_1 - 30761:31063)	0	0	(contig_4 - 7985:8716)	0	0	0	0	0	0	0	0	0	0	0	0	0	0	0	0	(contig_1 - 3143:3214)	(contig_4 - 9888:11093)	0	0	(contig_12 - 9563:10180)	0	0	0	0	0	0	0	(contig_3 - 264120:264542)	(contig_5 - 10497:11129)	(contig_1 - 650438:650812)	(contig_7 - 75236:75649)	0	(contig_3 - 293376:294344)	0	(contig_7 - 89729:91267)	0	0	(contig_3 - 82386:82934)	(contig_6 - 39252:40163)
109		H1-17-0400-1	-	survived	no MRSA	0	0	0	0	0	0	0	0	0	0	0	0	0	0	0	0	0	0	0	0	0	0	0	0	(contig_10 - 8578:9195)	0	0	0	0	0	0	0	(contig_2 - 765227:765649)	(contig_1 - 1159790:1160422)	(contig_1 - 860518:860892)	(contig_4 - 75218:75631)	0	(contig_2 - 794483:795451)	(contig_2 - 558707:559528)	(contig_4 - 89711:91249)	0	0	(contig_2 - 583439:583987)	(contig_3 - 118990:119901)
110		H5-17-0087-1	(CC1)	survived	no MRSA	(contig_2 - 136541:136843)	0	0	0	0	0	0	0	0	0	0	0	0	0	0	0	0	0	0	(contig_1 - 646278:647981)	0	(contig_2 - 177573:178778)	0	0	0	0	0	0	0	(contig_3 - 249367:249753)	(contig_3 - 455074:455739)	0	0	0	0	0	(contig_1 - 250300:250722)	(contig_3 - 169750:170718)	(contig_3 - 401567:402388)	0	0	0	0	(contig_6 - 41308:42219)
111		H4-17-0126-1	(CC1)	died	no MRSA	(contig_1 - 859235:859537)	0	0	0	0	0	0	0	0	0	0	0	0	0	0	0	0	0	0	(contig_1 - 576946:578649)	0	(contig_1 - 900266:901471)	0	0	0	0	0	0	0	(contig_3 - 65050:65436)	(contig_4 - 81381:82046)	0	0	0	0	0	(contig_1 - 180874:181296)	(contig_3 - 144084:145052)	(contig_4 - 134731:135552)	0	0	0	0	(contig_8 - 7833:8744)
112		H2-17-0477-1	(CC1)	survived	no MRSA	0	0	0	0	0	0	0	0	0	0	0	0	0	(contig_4 - 255682:256047)	0	0	0	0	0	(contig_1 - 147252:148955)	(contig_8 - 27122:27193)	(contig_8 - 40017:41222)	0	0	0	0	0	0	0	(contig_3 - 249143:249529)	(contig_6 - 143140:143805)	0	(contig_3 - 201227:201649)	0	0	0	0	(contig_3 - 169651:170619)	(contig_6 - 89633:90454)	(contig_9 - 90058:91596)	0	(contig_5 - 57595:58101)	0	(contig_8 - 83928:84839)
113		H4-18-0228-1	(CC1)	survived	MRSA	0	0	0	0	0	0	0	0	0	0	0	0	0	0	0	0	0	0	0	0	0	0	0	0	0	0	0	0	0	(contig_3 - 249205:249591)	(contig_6 - 4066:4731)	0	(contig_3 - 201289:201711)	0	0	0	0	(contig_3 - 169712:170680)	(contig_6 - 57405:58226)	(contig_7 - 16722:18260)	0	(contig_1 - 53867:54373)	0	(contig_5 - 41314:42225)
114		H5-18-0202-1	(CC1)	survived	no MRSA	0	0	0	0	0	0	0	0	0	0	0	0	0	0	0	0	0	0	0	0	0	0	0	0	0	0	0	0	0	(contig_6 - 65050:65436)	(contig_2 - 419133:419798)	0	0	0	0	0	0	(contig_3 - 169720:170688)	0	(contig_7 - 16761:18299)	0	(contig_1 - 57359:57865)	0	(contig_4 - 41198:42109)
115		H5-17-0226-1	(CC1)	survived	no MRSA	0	0	0	0	0	0	0	0	0	0	0	0	0	0	0	0	0	0	0	0	0	0	0	0	0	0	0	0	0	(contig_3 - 249126:249512)	(contig_6 - 143207:143872)	0	(contig_3 - 201209:201631)	0	0	0	0	(contig_3 - 169631:170599)	(contig_6 - 89712:90533)	(contig_7 - 90035:91573)	0	(contig_1 - 1234127:1234633)	0	(contig_4 - 130505:131416)
116		H2-20-0296-1	188	survived	no MRSA	0	0	0	0	0	0	0	0	0	0	0	0	0	0	0	0	0	(contig_6 - 57369:57710)	0	0	0	0	0	0	0	0	0	0	0	0	0	(contig_7 - 71142:71942)	0	0	0	(contig_14 - 32317:32730)	0	(contig_2 - 285955:286923)	(contig_2 - 56759:57580)	(contig_14 - 16700:18238)	0	0	0	0
117		H5-17-0289-1	188	survived	no MRSA	0	0	0	0	0	0	0	0	0	0	0	0	0	(contig_1 - 821803:822168)	0	0	0	(contig_5 - 57369:57710)	0	(contig_1 - 653884:655587)	0	0	0	0	0	0	0	0	0	0	0	(contig_3 - 262395:263195)	0	0	0	(contig_7 - 32102:32515)	(contig_1 - 1081558:1081980)	(contig_2 - 360950:361918)	(contig_2 - 132726:133547)	(contig_7 - 16485:18023)	0	0	0	0
118		H2-20-0381-1	188	survived	no MRSA	0	0	0	0	0	0	0	0	0	0	0	0	0	0	0	0	0	(contig_6 - 57369:57710)	0	(contig_1 - 189521:191224)	0	0	0	0	0	0	0	0	0	0	0	(contig_3 - 54112:54912)	0	0	0	(contig_9 - 75549:75962)	(contig_1 - 572837:573259)	(contig_2 - 170398:171366)	(contig_2 - 399659:400480)	(contig_9 - 89975:91513)	0	0	0	0
119		H2-19-0722-1	188	died	no MRSA	0	0	0	0	0	0	0	0	0	0	0	0	0	0	0	0	0	(contig_7 - 57372:57713)	0	(contig_1 - 732337:734040)	0	0	0	0	0	0	0	0	0	0	0	(contig_3 - 132184:132984)	0	0	0	(contig_6 - 32260:32673)	(contig_1 - 308703:309125)	(contig_2 - 285981:286949)	(contig_2 - 56769:57590)	(contig_6 - 16643:18181)	0	0	0	0
120		H2-17-0639-1	188	survived	no MRSA	0	0	0	0	0	0	0	0	0	0	0	0	0	0	0	0	0	(contig_3 - 345824:346165)	0	(contig_1 - 641766:643469)	0	0	0	0	0	0	0	0	0	0	0	(contig_2 - 262265:263065)	0	0	0	(contig_7 - 75551:75964)	(contig_1 - 259832:260254)	0	(contig_3 - 281909:282730)	(contig_7 - 90043:91581)	0	0	0	0
121		H2-20-0011-1	188	survived	no MRSA	0	0	0	0	0	0	0	0	0	0	0	0	0	0	0	0	0	(contig_2 - 974886:975227)	0	(contig_1 - 632335:634038)	0	0	0	0	(contig_7 - 22827:23444)	0	0	0	0	0	0	(contig_2 - 588435:589235)	0	0	0	(contig_4 - 32102:32515)	(contig_1 - 250130:250552)	(contig_2 - 171466:172434)	(contig_2 - 400825:401646)	(contig_4 - 16485:18023)	0	0	0	0
122		H2-17-0382-1	-	survived	no MRSA	0	0	0	0	0	0	0	0	0	0	0	0	0	0	0	0	0	(contig_5 - 57370:57711)	0	(contig_1 - 599408:601111)	0	0	0	0	0	0	0	0	0	0	0	(contig_2 - 360123:360923)	0	0	0	(contig_4 - 75550:75963)	(contig_1 - 982750:983172)	(contig_2 - 779398:780366)	(contig_2 - 550188:551009)	(contig_4 - 90042:91580)	0	0	0	0
123		H5-20-0254-1	630	survived	no MRSA	0	0	0	0	0	0	0	0	0	0	0	0	0	0	0	0	0	0	0	0	0	0	0	0	0	0	0	0	0	0	0	(contig_4 - 57941:58741)	(contig_2 - 188727:189149)	(contig_1 - 6855:7487)	(contig_1 - 329613:329987)	(contig_8 - 75594:76007)	(contig_1 - 290233:290655)	0	(contig_7 - 48240:49061)	(contig_8 - 91558:93096)	(contig_14 - 30897:32258)	(contig_1 - 93070:93576)	(contig_7 - 72958:73506)	(contig_11 - 87857:88768)
124		H5-20-0392-1	8 (CC8)	survived	no MRSA	0	0	(contig_10 - 17352:17444)	0	0	0	0	0	0	0	0	0	0	(contig_1 - 262642:263007)	0	0	0	0	0	0	0	0	0	0	0	0	0	0	0	0	0	0	(contig_5 - 210246:210668)	(contig_2 - 334213:334845)	(contig_1 - 483140:483514)	(contig_8 - 75594:76007)	(contig_2 - 75544:75966)	(contig_5 - 179402:180370)	(contig_6 - 143789:144610)	(contig_8 - 91558:93096)	(contig_3 - 286416:287777)	(contig_2 - 287315:287821)	(contig_6 - 168507:169055)	(contig_7 - 37910:38821)
125		H3-17-0251-1	8 (CC8)	survived	no MRSA	(contig_4 - 158722:159024)	0	0	0	0	0	0	0	0	0	0	0	(contig_16 - 10758:11177)	0	0	0	0	0	0	0	0	0	0	0	(contig_16 - 826:1443)	(contig_18 - 12547:12867)	0	0	0	0	0	0	(contig_3 - 115268:115690)	0	(contig_1 - 547404:547778)	(contig_8 - 35168:35581)	(contig_1 - 586736:587158)	(contig_3 - 145567:146535)	(contig_6 - 91987:92808)	(contig_8 - 18145:19683)	(contig_4 - 6727:8088)	(contig_1 - 783704:784210)	0	(contig_5 - 41029:41940)
126		H2-20-0391-1	8 (CC8)	survived	no MRSA	0	0	0	0	0	0	0	0	0	0	0	0	0	0	0	0	0	(contig_3 - 283419:283760)	0	0	0	0	0	0	0	(contig_3 - 294601:294921)	0	0	0	0	0	0	(contig_3 - 188609:189031)	0	(contig_1 - 733256:733630)	(contig_8 - 38212:38625)	(contig_1 - 772588:773010)	(contig_3 - 157765:158733)	(contig_5 - 107086:107907)	(contig_8 - 18129:19667)	(contig_1 - 6824:8185)	(contig_4 - 53897:54403)	(contig_5 - 131677:132225)	(contig_11 - 41031:41942)
127		H2-18-0433-1	8 (CC8)	survived	no MRSA	0	0	0	0	0	0	0	0	0	0	0	0	0	0	0	0	0	0	0	0	0	(contig_1 - 391094:392299)	0	0	(contig_9 - 17520:18137)	0	0	0	0	0	0	0	(contig_2 - 210401:210823)	0	(contig_1 - 1055157:1055531)	(contig_6 - 35067:35480)	(contig_1 - 1094489:1094911)	(contig_2 - 179494:180462)	(contig_2 - 419070:419891)	(contig_6 - 17978:19516)	(contig_1 - 282192:283553)	(contig_1 - 1291231:1291737)	(contig_2 - 394764:395312)	(contig_5 - 104602:105513)
128		H2-18-0341-1	8 (CC8)	survived	no MRSA	0	0	0	0	0	0	0	0	0	0	0	0	0	0	0	0	0	0	0	0	0	(contig_1 - 197155:198360)	0	0	(contig_12 - 17520:18137)	0	0	0	0	0	0	0	(contig_2 - 188778:189200)	0	(contig_1 - 861218:861592)	(contig_6 - 75493:75906)	(contig_1 - 900550:900972)	(contig_2 - 157871:158839)	(contig_2 - 397447:398268)	(contig_6 - 91457:92995)	(contig_1 - 88253:89614)	(contig_1 - 1097292:1097798)	(contig_2 - 373141:373689)	(contig_5 - 104602:105513)
129		H2-20-0111-1	8 (CC8)	survived	no MRSA	0	0	0	0	0	0	0	0	0	0	0	0	0	0	0	0	0	0	0	0	0	0	0	0	0	0	0	0	0	0	0	0	(contig_2 - 188718:189140)	0	(contig_3 - 157290:157664)	(contig_7 - 75592:76005)	(contig_3 - 196678:197100)	(contig_2 - 157873:158841)	(contig_2 - 396451:397272)	(contig_7 - 91555:93093)	(contig_1 - 88254:89615)	(contig_3 - 393554:394060)	(contig_2 - 372134:372682)	(contig_10 - 41027:41938)
130		H2-18-0443-1	8 (CC8)	survived	no MRSA	0	0	0	0	0	0	0	0	0	0	0	0	0	0	0	0	0	(contig_4 - 220845:221186)	0	0	0	0	0	0	0	(contig_4 - 232027:232347)	0	0	0	0	0	0	(contig_3 - 150739:151161)	0	(contig_1 - 486117:486491)	(contig_7 - 75593:76006)	(contig_1 - 541470:541892)	(contig_3 - 119893:120861)	(contig_3 - 359152:359973)	(contig_7 - 91557:93095)	(contig_2 - 195970:197331)	(contig_1 - 738302:738808)	(contig_3 - 334835:335383)	(contig_5 - 41030:41941)
131		H4-18-0404-1	8 (CC8)	died	no MRSA	0	0	0	0	0	0	0	0	0	0	0	0	0	(contig_1 - 946264:946629)	0	0	0	0	0	0	0	0	0	0	0	0	0	0	0	0	0	0	(contig_2 - 265954:266376)	0	(contig_1 - 904985:905359)	(contig_7 - 35177:35590)	0	(contig_2 - 296252:297220)	(contig_2 - 56828:57649)	(contig_7 - 18145:19683)	(contig_1 - 177459:178820)	(contig_3 - 234063:234569)	(contig_2 - 81418:81966)	(contig_9 - 41031:41942)
132		H4-18-0322-1	8 (CC8)	survived	no MRSA	0	0	0	0	0	0	0	0	0	0	0	0	0	0	0	0	0	0	0	0	0	0	0	0	0	(contig_9 - 27645:27965)	0	0	0	0	0	0	(contig_2 - 651284:651706)	0	(contig_1 - 815761:816135)	(contig_6 - 75593:76006)	(contig_1 - 855093:855515)	(contig_2 - 681582:682550)	(contig_2 - 443738:444559)	(contig_6 - 91500:93038)	(contig_1 - 88302:89663)	(contig_1 - 1051982:1052488)	(contig_2 - 468328:468876)	(contig_4 - 139742:140653)
133		H5-18-0160-1	8 (CC8)	survived	no MRSA	0	0	0	0	0	0	0	0	0	0	0	0	0	0	0	0	0	(contig_16 - 11651:11992)	0	0	0	0	0	0	0	(contig_16 - 490:810)	0	0	0	0	0	0	(contig_2 - 179627:180049)	0	(contig_1 - 530064:530438)	(contig_14 - 35236:35649)	(contig_1 - 569396:569818)	(contig_2 - 148783:149751)	(contig_2 - 388359:389180)	(contig_14 - 18204:19742)	0	(contig_1 - 766328:766834)	(contig_2 - 364043:364591)	(contig_10 - 41027:41938)
134		H4-18-0458-1	8 (CC8)	survived	no MRSA	0	0	0	0	0	0	0	0	0	0	0	0	0	0	0	0	0	0	0	0	0	0	0	0	0	0	0	0	0	0	0	0	(contig_2 - 651341:651763)	0	(contig_1 - 346287:346661)	(contig_5 - 75593:76006)	(contig_1 - 306907:307329)	(contig_2 - 684632:685600)	(contig_2 - 442213:443034)	(contig_5 - 91500:93038)	(contig_1 - 1072834:1074195)	(contig_1 - 109891:110397)	(contig_2 - 466803:467351)	0
135		H1-18-0075-1	-	survived	no MRSA	0	(contig_14 - 7948:8625)	0	0	(contig_15 - 6225:6836)	(contig_14 - 264:1043)	(contig_14 - 9336:9515)	(contig_14 - 13346:13534)	(contig_14 - 10148:10918)	(contig_14 - 9643:10044)	(contig_14 - 2096:2263)	(contig_14 - 1133:1939)	(contig_15 - 7189:7608)	0	0	0	0	(contig_3 - 279939:280280)	(contig_14 - 15086:15226)	0	0	0	0	0	(contig_14 - 13921:14538)	(contig_3 - 268769:269089)	0	0	0	0	0	0	(contig_4 - 188581:189003)	(contig_6 - 105726:106358)	(contig_1 - 516254:516628)	(contig_7 - 31523:31936)	(contig_1 - 555574:555996)	(contig_4 - 157736:158704)	(contig_2 - 91506:92135)	(contig_7 - 14434:15972)	(contig_3 - 88253:89614)	(contig_6 - 58830:59336)	(contig_2 - 67115:67663)	(contig_5 - 132725:133636)
136		H4-17-0416-1	8 (CC8)	survived	no MRSA	0	0	0	0	(contig_18 - 1944:2555)	(contig_17 - 17195:17974)	(contig_17 - 8732:8911)	(contig_17 - 4713:4901)	(contig_17 - 7329:8099)	(contig_17 - 8203:8604)	(contig_17 - 15975:16142)	(contig_17 - 16299:17105)	(contig_18 - 1172:1591)	0	0	0	0	0	(contig_17 - 3021:3161)	0	0	0	0	0	(contig_17 - 3709:4326)	0	0	0	0	0	0	0	(contig_3 - 188659:189081)	0	(contig_1 - 516170:516544)	(contig_6 - 75493:75906)	0	(contig_3 - 157813:158781)	(contig_9 - 56971:57600)	(contig_6 - 91457:92995)	(contig_4 - 88252:89613)	(contig_1 - 796486:796992)	(contig_10 - 5961:6509)	(contig_5 - 41099:42010)
137		H5-19-0334-1	8 (CC8)	survived	no MRSA	0	(contig_17 - 9620:10297)	0	0	(contig_18 - 1944:2555)	(contig_17 - 17202:17981)	(contig_17 - 8730:8909)	(contig_17 - 4711:4899)	(contig_17 - 7327:8097)	(contig_17 - 8201:8602)	(contig_17 - 15982:16149)	(contig_17 - 16306:17112)	(contig_18 - 1172:1591)	0	0	0	0	0	(contig_17 - 3019:3159)	0	0	0	0	0	(contig_17 - 3707:4324)	0	0	0	0	0	0	0	(contig_3 - 115375:115797)	(contig_1 - 799474:800106)	(contig_1 - 516291:516665)	(contig_8 - 75492:75905)	(contig_1 - 555611:556033)	(contig_3 - 145674:146642)	(contig_2 - 92535:93164)	0	(contig_4 - 88252:89613)	(contig_1 - 752575:753081)	(contig_2 - 68091:68639)	(contig_12 - 7191:8102)
138		H2-20-0558-1	8 (CC8)	survived	no MRSA	0	0	0	0	0	0	0	0	0	0	0	0	0	0	0	0	0	0	0	0	0	0	0	0	0	0	0	0	0	0	0	0	(contig_3 - 115286:115708)	(contig_1 - 799351:799983)	(contig_1 - 516237:516611)	(contig_8 - 33168:33581)	(contig_1 - 555557:555979)	(contig_3 - 145586:146554)	(contig_6 - 92541:93170)	(contig_8 - 16079:17617)	(contig_4 - 88252:89613)	(contig_1 - 752453:752959)	(contig_6 - 68096:68644)	(contig_5 - 130867:131778)
139		H3-17-0215-1	8 (CC8)	survived	no MRSA	0	(contig_19 - 5127:5804)	0	0	(contig_19 - 15902:16513)	(contig_19 - 12709:13488)	(contig_19 - 4237:4416)	(contig_19 - 218:406)	(contig_19 - 2834:3604)	(contig_19 - 3708:4109)	(contig_19 - 11489:11656)	(contig_19 - 11813:12619)	(contig_19 - 15130:15549)	0	0	0	0	0	(contig_32 - 1254:1394)	0	0	0	0	0	(contig_32 - 89:706)	0	0	0	0	0	0	0	(contig_8 - 28898:29320)	(contig_4 - 248045:248677)	(contig_1 - 439250:439624)	(contig_9 - 33168:33581)	(contig_4 - 4119:4541)	(contig_6 - 135:1103)	(contig_7 - 56763:57584)	0	(contig_3 - 94939:96300)	(contig_4 - 201147:201653)	(contig_7 - 81481:82029)	(contig_5 - 130709:131620)
140		H4-17-0353-1	619	survived	no MRSA	0	0	0	0	0	0	0	0	0	0	0	0	0	0	0	0	0	0	0	0	0	0	0	0	0	0	0	0	0	0	0	0	(contig_4 - 115373:115795)	(contig_1 - 6958:7590)	(contig_1 - 290769:291143)	(contig_7 - 33111:33524)	(contig_1 - 251389:251811)	(contig_4 - 145673:146641)	(contig_5 - 116710:117531)	(contig_7 - 16079:17617)	0	(contig_1 - 53982:54488)	(contig_5 - 141497:142045)	(contig_6 - 41127:42038)
141		H5-20-0004-1	8 (CC8)	died	no MRSA	0	0	0	0	0	0	0	0	0	0	0	0	0	0	0	0	0	0	0	0	(contig_14 - 11593:11664)	0	0	0	0	0	0	0	0	0	0	0	(contig_4 - 115254:115676)	(contig_3 - 6802:7434)	(contig_3 - 289995:290369)	(contig_5 - 33168:33581)	(contig_3 - 250616:251038)	(contig_4 - 145554:146522)	(contig_2 - 474701:475522)	(contig_5 - 16079:17617)	(contig_1 - 643001:644362)	(contig_3 - 53821:54327)	(contig_9 - 67985:68533)	(contig_11 - 41101:42012)
142		H5-17-0095-1	6853	survived	no MRSA	0	0	0	0	0	0	0	0	0	0	0	0	0	0	0	0	0	0	0	0	0	0	0	0	0	0	0	0	0	0	0	0	(contig_3 - 210278:210700)	(contig_1 - 6869:7501)	(contig_1 - 290342:290716)	(contig_7 - 33168:33581)	(contig_1 - 250974:251396)	(contig_3 - 179433:180401)	(contig_2 - 92200:92829)	(contig_7 - 16079:17617)	(contig_4 - 208811:210172)	(contig_1 - 53773:54279)	(contig_2 - 67686:68234)	(contig_5 - 146786:147697)
143		H2-20-0022-1	2416	survived	no MRSA	0	0	0	0	0	0	0	0	0	0	0	0	0	0	0	0	0	0	0	0	0	0	0	0	0	0	0	0	0	0	0	0	0	(contig_5 - 233167:233799)	(contig_1 - 516253:516627)	(contig_8 - 33168:33581)	(contig_1 - 555585:556007)	(contig_3 - 145577:146545)	0	(contig_8 - 16079:17617)	(contig_4 - 209432:210793)	(contig_5 - 186268:186774)	(contig_11 - 67712:68260)	(contig_6 - 41100:42011)
144		H5-18-0145-1	8 (CC8)	died	MRSA	(contig_4 - 105456:105758)	(contig_17 - 7948:8625)	0	0	(contig_18 - 1944:2555)	(contig_17 - 264:1043)	(contig_17 - 9336:9515)	(contig_17 - 13346:13534)	(contig_17 - 10148:10918)	(contig_17 - 9643:10044)	(contig_17 - 2096:2263)	(contig_17 - 1133:1939)	(contig_18 - 1172:1591)	0	0	0	0	0	(contig_17 - 15086:15226)	0	(contig_4 - 133295:133366)	(contig_4 - 146587:147792)	0	0	(contig_17 - 13921:14538)	0	0	0	0	0	0	0	(contig_3 - 186430:186852)	(contig_1 - 7044:7676)	(contig_1 - 290561:290935)	(contig_8 - 33168:33581)	(contig_1 - 251181:251603)	(contig_3 - 216729:217697)	(contig_10 - 17933:18754)	0	(contig_4 - 255277:256638)	(contig_1 - 54057:54563)	(contig_3 - 5964:6512)	(contig_5 - 130743:131654)
145		H2-18-0161-1	8 (CC8)	died	MRSA	2 (contig_1 - 105455:105757; contig_46 - 408:710)	(contig_21 - 9620:10297)	(contig_6 - 114120:114212)	0	(contig_24 - 6225:6836)	(contig_21 - 17232:18011)	(contig_21 - 8730:8909)	(contig_21 - 4711:4899)	(contig_21 - 7327:8097)	(contig_21 - 8201:8602)	(contig_21 - 16012:16179)	(contig_21 - 16336:17142)	(contig_24 - 7189:7608)	(contig_23 - 6381:6746)	0	0	0	(contig_12 - 77460:77801)	(contig_21 - 3019:3159)	0	(contig_1 - 133125:133196)	(contig_1 - 146417:147622)	0	0	(contig_21 - 3707:4324)	(contig_12 - 66299:66619)	0	0	0	0	0	0	(contig_4 - 188479:188901)	(contig_5 - 14969:15601)	(contig_2 - 25488:25862)	(contig_10 - 33168:33581)	0	(contig_4 - 157637:158605)	(contig_7 - 105210:106031)	(contig_10 - 16079:17617)	(contig_1 - 255164:256525)	(contig_5 - 61981:62487)	(contig_7 - 129927:130475)	(contig_13 - 19556:20467)
146		H2-17-0377-1	-	died	no MRSA	0	(contig_15 - 9621:10298)	0	0	(contig_16 - 1944:2555)	(contig_15 - 17202:17981)	(contig_15 - 8731:8910)	(contig_15 - 4712:4900)	(contig_15 - 7328:8098)	(contig_15 - 8202:8603)	(contig_15 - 15982:16149)	(contig_15 - 16306:17112)	(contig_16 - 1172:1591)	0	0	0	0	(contig_1 - 238891:239232)	(contig_15 - 3020:3160)	0	0	0	0	0	(contig_15 - 3708:4325)	(contig_1 - 250073:250393)	0	0	0	0	0	0	(contig_3 - 191273:191695)	(contig_1 - 828085:828717)	(contig_1 - 528211:528585)	(contig_7 - 75493:75906)	0	(contig_3 - 221511:222479)	(contig_9 - 56861:57682)	(contig_7 - 91457:92995)	(contig_4 - 88306:89667)	(contig_1 - 781199:781705)	(contig_3 - 5964:6512)	(contig_5 - 41071:41982)
147		H4-17-0181-1	8 (CC8)	died	no MRSA	0	(contig_15 - 9630:10307)	0	0	(contig_16 - 6225:6836)	(contig_15 - 17212:17991)	(contig_15 - 8740:8919)	(contig_15 - 4721:4909)	(contig_15 - 7337:8107)	(contig_15 - 8211:8612)	(contig_15 - 15992:16159)	(contig_15 - 16316:17122)	(contig_16 - 7189:7608)	0	0	0	0	0	(contig_15 - 3029:3169)	0	0	0	0	0	(contig_15 - 3717:4334)	0	0	0	0	0	0	0	(contig_4 - 188507:188929)	(contig_5 - 10553:11185)	(contig_1 - 514489:514863)	(contig_8 - 75593:76006)	(contig_1 - 553821:554243)	(contig_4 - 157845:158813)	(contig_2 - 441675:442496)	(contig_8 - 91557:93095)	(contig_3 - 203161:204522)	(contig_5 - 57565:58071)	(contig_4 - 373264:373812)	(contig_6 - 41101:42012)
148		H2-17-0666-1	8 (CC8)	survived	no MRSA	0	(contig_17 - 7948:8625)	0	0	(contig_18 - 6224:6835)	(contig_17 - 264:1043)	(contig_17 - 9336:9515)	(contig_17 - 13346:13534)	(contig_17 - 10148:10918)	(contig_17 - 9643:10044)	(contig_17 - 2096:2263)	(contig_17 - 1133:1939)	(contig_18 - 7188:7607)	0	0	0	0	0	(contig_17 - 15086:15226)	0	0	0	0	0	(contig_17 - 13921:14538)	0	0	0	0	0	0	0	(contig_4 - 76421:76843)	(contig_1 - 814483:815115)	(contig_1 - 514376:514750)	(contig_7 - 33168:33581)	(contig_1 - 570184:570606)	(contig_4 - 45576:46544)	(contig_9 - 56796:57617)	(contig_7 - 16079:17617)	(contig_3 - 208835:210196)	(contig_1 - 767599:768105)	(contig_4 - 261220:261768)	(contig_5 - 41099:42010)
149		H5-17-0037-1	8 (CC8)	survived	no MRSA	0	(contig_19 - 7939:8616)	0	0	(contig_20 - 1944:2555)	(contig_19 - 264:1043)	(contig_19 - 9327:9506)	(contig_19 - 13337:13525)	(contig_19 - 10139:10909)	(contig_19 - 9634:10035)	(contig_19 - 2087:2254)	(contig_19 - 1124:1930)	(contig_20 - 1172:1591)	0	0	0	0	0	(contig_19 - 15077:15217)	0	0	0	0	0	(contig_19 - 13912:14529)	0	0	0	0	0	0	0	(contig_3 - 115666:116088)	(contig_5 - 265567:266199)	(contig_2 - 24130:24504)	(contig_7 - 75593:76006)	(contig_5 - 21323:21745)	(contig_3 - 145964:146932)	(contig_1 - 17900:18721)	(contig_7 - 91557:93095)	(contig_4 - 210006:211367)	(contig_5 - 218681:219187)	(contig_9 - 68328:68876)	(contig_10 - 14336:15247)
150		H4-18-0190-1	3473	survived	no MRSA	0	0	0	0	0	0	0	0	0	0	0	0	0	0	0	0	0	0	0	0	0	0	0	0	0	0	0	0	0	0	0	0	(contig_3 - 188584:189006)	(contig_1 - 797799:798431)	(contig_1 - 514262:514636)	(contig_6 - 33167:33580)	(contig_1 - 553594:554016)	(contig_3 - 157706:158674)	0	(contig_6 - 16079:17617)	(contig_4 - 209590:210951)	(contig_1 - 750913:751419)	(contig_3 - 373757:374305)	(contig_5 - 130293:131204)
151		H4-18-0231-1	8 (CC8)	survived	no MRSA	0	(contig_17 - 7948:8625)	0	0	(contig_18 - 1944:2555)	(contig_17 - 264:1043)	(contig_17 - 9336:9515)	(contig_17 - 13346:13534)	(contig_17 - 10148:10918)	(contig_17 - 9643:10044)	(contig_17 - 2096:2263)	(contig_17 - 1133:1939)	(contig_18 - 1172:1591)	0	0	0	0	(contig_6 - 83050:83391)	(contig_17 - 15086:15226)	0	0	0	0	0	(contig_17 - 13921:14538)	(contig_6 - 94232:94552)	0	0	0	0	0	0	(contig_3 - 189299:189721)	(contig_5 - 212344:212976)	(contig_1 - 558358:558732)	(contig_9 - 33168:33581)	(contig_1 - 597690:598112)	(contig_3 - 219598:220566)	(contig_2 - 442093:442914)	(contig_9 - 16079:17617)	(contig_4 - 88306:89667)	(contig_5 - 165458:165964)	(contig_3 - 5834:6382)	(contig_11 - 12576:13487)
152		H1-17-0477-1	8 (CC8)	survived	no MRSA	0	0	0	0	0	0	0	0	0	0	0	0	0	0	0	0	0	0	0	0	0	0	0	0	0	0	0	0	0	0	0	0	(contig_3 - 190578:191000)	(contig_1 - 1098061:1098693)	(contig_1 - 814559:814933)	(contig_5 - 75544:75957)	(contig_1 - 853891:854313)	(contig_3 - 220877:221845)	(contig_2 - 445030:445851)	(contig_5 - 91508:93046)	(contig_1 - 88253:89614)	(contig_1 - 1051175:1051681)	(contig_3 - 5838:6386)	(contig_4 - 130648:131559)
153		H2-18-0606-1	8 (CC8)	died	no MRSA	0	(contig_14 - 7948:8625)	0	0	(contig_15 - 1944:2555)	(contig_14 - 264:1043)	(contig_14 - 9336:9515)	(contig_14 - 13346:13534)	(contig_14 - 10148:10918)	(contig_14 - 9643:10044)	(contig_14 - 2096:2263)	(contig_14 - 1133:1939)	(contig_15 - 1172:1591)	0	0	0	0	0	(contig_14 - 15086:15226)	0	0	0	0	0	(contig_14 - 13921:14538)	0	0	0	0	0	0	0	(contig_2 - 210291:210713)	(contig_1 - 798040:798672)	(contig_1 - 514427:514801)	(contig_7 - 33165:33578)	(contig_1 - 553703:554125)	(contig_2 - 179446:180414)	(contig_2 - 419602:420423)	(contig_7 - 16079:17617)	(contig_4 - 88253:89614)	(contig_1 - 751153:751659)	(contig_2 - 395088:395636)	(contig_5 - 132467:133378)
154		H2-18-0593-1	8 (CC8)	survived	no MRSA	0	0	0	0	(contig_23 - 1943:2554)	(contig_19 - 264:1043)	(contig_19 - 9335:9514)	(contig_19 - 13345:13533)	(contig_19 - 10147:10917)	(contig_19 - 9642:10043)	(contig_19 - 2096:2263)	(contig_19 - 1133:1939)	(contig_23 - 2907:3326)	0	0	0	0	0	(contig_19 - 15085:15225)	0	0	0	0	0	(contig_19 - 13920:14537)	0	0	0	0	0	0	0	(contig_12 - 29444:29866)	(contig_1 - 798039:798671)	(contig_1 - 514473:514847)	(contig_9 - 33168:33581)	(contig_1 - 553805:554227)	(contig_6 - 235:1203)	(contig_4 - 17907:18728)	(contig_9 - 16079:17617)	(contig_2 - 88305:89666)	(contig_1 - 751092:751598)	(contig_11 - 5991:6539)	(contig_5 - 41102:42013)
155		H2-20-0575-1	8 (CC8)	died	no MRSA	0	(contig_16 - 7938:8615)	0	0	(contig_17 - 6225:6836)	(contig_16 - 404:1042)	(contig_16 - 9326:9505)	(contig_16 - 13336:13524)	(contig_16 - 10138:10908)	(contig_16 - 9633:10034)	(contig_16 - 2086:2253)	(contig_16 - 1123:1929)	(contig_17 - 7189:7608)	0	0	0	0	0	(contig_16 - 15076:15216)	0	0	0	0	0	(contig_16 - 13911:14528)	0	0	0	0	0	0	0	(contig_3 - 190378:190800)	(contig_1 - 836241:836873)	(contig_1 - 557379:557753)	(contig_7 - 75593:76006)	(contig_1 - 596711:597133)	(contig_3 - 220676:221644)	(contig_9 - 56896:57717)	(contig_7 - 91557:93095)	(contig_4 - 88306:89667)	(contig_1 - 794132:794638)	(contig_3 - 5834:6382)	(contig_5 - 41102:42013)
156		H2-20-0098-1	8 (CC8)	died	no MRSA	0	0	0	0	0	0	0	0	0	0	0	0	0	0	0	0	0	0	0	0	0	0	0	0	0	0	0	0	0	0	0	0	(contig_3 - 92262:92684)	(contig_1 - 1141453:1142085)	(contig_1 - 814651:815025)	(contig_6 - 33168:33581)	(contig_1 - 853983:854405)	(contig_3 - 122561:123529)	(contig_2 - 116577:117398)	(contig_6 - 16079:17617)	(contig_1 - 88253:89614)	(contig_1 - 1050929:1051435)	(contig_2 - 91994:92542)	(contig_4 - 41103:42014)
157		H1-17-0463-1	8 (CC8)	survived	no MRSA	(contig_6 - 105682:105984)	0	0	0	0	0	0	0	0	0	0	0	0	0	0	0	0	0	0	0	0	(contig_5 - 197210:198415)	0	0	0	0	0	0	0	0	0	0	(contig_2 - 266454:266876)	(contig_4 - 248460:249092)	(contig_15 - 6500:6874)	(contig_10 - 33168:33581)	(contig_4 - 4350:4772)	(contig_2 - 296754:297722)	(contig_2 - 56739:57560)	(contig_10 - 16079:17617)	(contig_5 - 88307:89668)	(contig_4 - 201575:202081)	(contig_2 - 81526:82074)	(contig_11 - 41101:42012)
158		H2-20-0471-1	-	survived	no MRSA	(contig_3 - 353455:353757)	0	0	0	0	0	0	0	0	0	0	0	0	0	0	0	0	0	0	0	0	(contig_3 - 311945:313150)	0	0	0	0	0	0	0	0	0	0	(contig_2 - 210292:210714)	(contig_1 - 798054:798686)	(contig_1 - 514480:514854)	(contig_6 - 33168:33581)	(contig_1 - 553809:554231)	(contig_2 - 179388:180356)	(contig_2 - 419607:420428)	(contig_6 - 16079:17617)	(contig_3 - 203042:204403)	(contig_1 - 751168:751674)	(contig_2 - 395093:395641)	(contig_5 - 41100:42011)
159		H2-18-0457-1	8 (CC8)	survived	no MRSA	(contig_5 - 105686:105988)	(contig_15 - 12000:12677)	(contig_1 - 591985:592077)	0	(contig_15 - 22776:23387)	(contig_15 - 19583:20362)	(contig_15 - 11110:11289)	(contig_15 - 7091:7279)	(contig_15 - 9707:10477)	(contig_15 - 10581:10982)	(contig_15 - 18363:18530)	(contig_15 - 18687:19493)	(contig_15 - 22004:22423)	0	0	0	0	0	(contig_15 - 5399:5539)	0	0	(contig_4 - 9995:11200)	0	0	(contig_15 - 6087:6704)	0	0	0	0	0	0	0	(contig_1 - 188668:189090)	(contig_3 - 261101:261733)	(contig_2 - 514478:514852)	(contig_7 - 75593:76006)	(contig_3 - 17119:17541)	(contig_1 - 157823:158791)	(contig_1 - 398088:398909)	(contig_7 - 91557:93095)	(contig_4 - 118743:120104)	(contig_3 - 214215:214721)	(contig_1 - 373505:374053)	(contig_6 - 41101:42012)
160		H2-18-0460-1	8 (CC8)	died	no MRSA	(contig_6 - 27641:27943)	(contig_15 - 12000:12677)	(contig_1 - 346557:346649)	0	(contig_15 - 22776:23387)	(contig_15 - 19583:20362)	(contig_15 - 11110:11289)	(contig_15 - 7091:7279)	(contig_15 - 9707:10477)	(contig_15 - 10581:10982)	(contig_15 - 18363:18530)	(contig_15 - 18687:19493)	(contig_15 - 22004:22423)	0	0	0	0	0	(contig_15 - 5399:5539)	0	0	(contig_4 - 9995:11200)	0	0	(contig_15 - 6087:6704)	0	0	0	0	0	0	0	(contig_3 - 190957:191379)	(contig_5 - 14871:15503)	(contig_2 - 514478:514852)	(contig_8 - 33168:33581)	(contig_5 - 259052:259474)	(contig_3 - 221256:222224)	(contig_1 - 539725:540546)	(contig_8 - 16079:17617)	(contig_4 - 118742:120103)	(contig_5 - 61883:62389)	0	(contig_7 - 41099:42010)
161		H2-17-0621-1	8 (CC8)	died	no MRSA	(contig_2 - 27641:27943)	(contig_13 - 12000:12677)	(contig_1 - 591914:592006)	0	(contig_13 - 22776:23387)	(contig_13 - 19583:20362)	(contig_13 - 11110:11289)	(contig_13 - 7091:7279)	(contig_13 - 9707:10477)	(contig_13 - 10581:10982)	(contig_13 - 18363:18530)	(contig_13 - 18687:19493)	(contig_13 - 22004:22423)	0	0	0	0	0	(contig_13 - 5399:5539)	0	0	(contig_4 - 9995:11200)	0	0	(contig_13 - 6087:6704)	0	0	0	0	0	0	0	(contig_1 - 188668:189090)	(contig_3 - 261114:261746)	(contig_2 - 648849:649223)	(contig_7 - 33168:33581)	(contig_3 - 17119:17541)	(contig_1 - 157823:158791)	(contig_1 - 398017:398838)	(contig_7 - 16079:17617)	(contig_4 - 118742:120103)	(contig_3 - 214228:214734)	(contig_1 - 373503:374051)	(contig_5 - 41101:42012)
162		H5-20-0041-1	20	survived	no MRSA	0	0	0	0	0	0	0	0	0	0	0	0	0	0	(contig_4 - 216024:217214)	0	0	(contig_1 - 586832:587173)	(contig_2 - 118525:118665)	(contig_5 - 159253:160956)	0	0	0	(contig_1 - 76931:77653)	(contig_2 - 119217:119834)	(contig_1 - 598014:598334)	0	0	0	(contig_8 - 124187:124573)	(contig_1 - 183876:184541)	(contig_1 - 315005:315805)	0	0	(contig_2 - 328658:329032)	(contig_10 - 33641:34054)	(contig_2 - 367792:368214)	(contig_8 - 45358:46326)	(contig_1 - 131042:131863)	(contig_10 - 16609:18147)	0	0	0	(contig_6 - 131520:132431)
163		H4-17-0333-1	20	died	no MRSA	0	0	0	0	0	0	0	0	0	0	0	0	0	0	(contig_25 - 15222:16412)	(contig_7 - 3253:5067)	0	0	(contig_14 - 13811:13951)	(contig_5 - 36110:37813)	0	0	0	(contig_12 - 35345:36067)	(contig_14 - 12642:13259)	0	0	0	(contig_7 - 108633:110111)	(contig_11 - 24149:24535)	(contig_3 - 70761:71426)	(contig_3 - 201847:202647)	0	0	(contig_10 - 51031:51405)	(contig_8 - 33128:33541)	(contig_10 - 11849:12271)	(contig_27 - 134:1102)	(contig_3 - 17928:18749)	(contig_8 - 16096:17634)	(contig_2 - 88690:90051)	0	0	(contig_9 - 51551:52462)
164		H2-18-0507-1	582	survived	no MRSA	0	0	0	0	0	0	0	0	0	0	0	0	0	0	(contig_4 - 86527:87717)	(contig_1 - 661590:663404)	(contig_6 - 7920:10946)	0	(contig_1 - 483455:483595)	0	0	0	(contig_11 - 33845:34648)	(contig_6 - 36379:37101)	(contig_1 - 484147:484764)	0	(contig_5 - 109763:111049)	(contig_1 - 444509:445006)	(contig_1 - 556503:557981)	(contig_3 - 67302:67688)	(contig_6 - 142314:142979)	(contig_2 - 20269:21069)	(contig_3 - 115136:115558)	(contig_4 - 306648:307280)	(contig_4 - 19416:19790)	(contig_10 - 75702:76115)	(contig_4 - 58550:58972)	(contig_3 - 144707:145675)	(contig_6 - 89490:90311)	(contig_12 - 14583:16121)	(contig_5 - 54328:55689)	(contig_4 - 255257:255763)	(contig_6 - 65161:65709)	(contig_7 - 38799:39710)
165		H2-18-0141-1	-	survived	no MRSA	0	0	0	(contig_1 - 343831:344562)	0	0	0	0	0	0	0	0	0	0	(contig_16 - 15309:16499)	(contig_6 - 161596:163410)	(contig_7 - 7874:10900)	(contig_4 - 126681:127022)	(contig_8 - 8824:8964)	0	(contig_1 - 332067:332138)	(contig_1 - 345735:346940)	(contig_19 - 33649:34452)	(contig_7 - 36332:37054)	(contig_8 - 7657:8274)	(contig_4 - 115681:116001)	(contig_3 - 109894:111180)	(contig_8 - 47413:47910)	(contig_6 - 56522:58000)	(contig_4 - 143941:144327)	(contig_7 - 142267:142932)	(contig_17 - 20270:21070)	(contig_4 - 83037:83459)	(contig_2 - 203512:204144)	(contig_14 - 30663:31037)	(contig_13 - 7621:8034)	(contig_16 - 44054:44476)	(contig_4 - 52920:53888)	(contig_7 - 89443:90264)	(contig_23 - 6556:8094)	(contig_3 - 54330:55691)	(contig_2 - 152122:152628)	(contig_7 - 65114:65662)	(contig_9 - 38486:39397)
166		H2-20-0303-1	582	survived	no MRSA	0	0	0	0	0	0	0	0	0	0	0	0	0	0	(contig_6 - 230611:231801)	(contig_3 - 189667:191481)	(contig_7 - 21262:24288)	(contig_7 - 14805:15146)	0	0	0	0	(contig_11 - 33845:34648)	(contig_7 - 49721:50443)	(contig_16 - 90:707)	(contig_7 - 3644:3964)	(contig_4 - 109760:111046)	(contig_1 - 444168:444665)	(contig_3 - 295065:296543)	(contig_5 - 67247:67633)	0	(contig_2 - 20270:21070)	(contig_5 - 115081:115503)	(contig_6 - 11102:11734)	(contig_3 - 154383:154757)	(contig_9 - 7621:8034)	(contig_3 - 115201:115623)	(contig_5 - 144532:145500)	(contig_7 - 102831:103652)	0	(contig_4 - 54325:55686)	(contig_6 - 62620:63126)	(contig_7 - 78503:79051)	(contig_8 - 38799:39710)
167		H5-18-0318-1	582	survived	no MRSA	0	0	0	0	0	0	0	0	0	0	0	0	0	0	(contig_8 - 15433:16623)	(contig_1 - 190670:192484)	(contig_2 - 136149:139175)	0	(contig_1 - 363120:363260)	0	0	0	(contig_12 - 4256:5059)	(contig_2 - 109994:110716)	(contig_1 - 361951:362568)	0	(contig_3 - 138664:139950)	(contig_1 - 401709:402206)	(contig_1 - 296069:297547)	(contig_2 - 214920:215306)	(contig_2 - 4116:4781)	(contig_4 - 222585:223385)	(contig_2 - 262754:263176)	(contig_7 - 11103:11735)	(contig_1 - 155386:155760)	(contig_9 - 7621:8034)	(contig_1 - 116204:116626)	(contig_2 - 292325:293293)	(contig_2 - 56784:57605)	(contig_13 - 14582:16120)	(contig_3 - 194024:195385)	(contig_7 - 62619:63125)	(contig_2 - 81386:81934)	(contig_6 - 90662:91573)
168		H4-17-0388-1	582	survived	no MRSA	0	0	0	0	0	0	0	0	0	0	0	0	0	0	(contig_1 - 230043:231233)	(contig_1 - 332840:334654)	(contig_4 - 21261:24287)	(contig_4 - 13601:13942)	(contig_2 - 5268:5408)	0	0	0	(contig_13 - 3387:4190)	(contig_4 - 49720:50442)	(contig_2 - 4099:4716)	(contig_4 - 2440:2760)	(contig_6 - 138686:139972)	(contig_2 - 43857:44354)	(contig_1 - 438239:439717)	(contig_5 - 67304:67690)	(contig_4 - 155655:156320)	(contig_3 - 20270:21070)	(contig_5 - 115138:115560)	(contig_1 - 10481:11113)	(contig_1 - 297556:297930)	(contig_8 - 75702:76115)	(contig_1 - 258374:258796)	(contig_5 - 144709:145677)	(contig_4 - 102831:103652)	(contig_15 - 6555:8093)	(contig_6 - 194046:195407)	(contig_1 - 61998:62504)	(contig_4 - 78502:79050)	(contig_7 - 38815:39726)
169		H2-20-0360-1	582	died	no MRSA	0	0	0	0	0	0	0	0	0	0	0	0	0	0	(contig_4 - 126916:128106)	(contig_4 - 23081:24895)	(contig_2 - 327731:330757)	0	0	0	0	0	(contig_13 - 4256:5059)	(contig_2 - 356190:356912)	(contig_21 - 538:1155)	0	(contig_5 - 109765:111051)	(contig_1 - 444388:444885)	(contig_6 - 71427:72905)	(contig_2 - 250832:251218)	(contig_2 - 462126:462791)	(contig_3 - 360088:360888)	(contig_2 - 202959:203381)	(contig_4 - 347035:347667)	(contig_4 - 59805:60179)	(contig_9 - 7621:8034)	(contig_4 - 98939:99361)	(contig_2 - 172842:173810)	(contig_2 - 409301:410122)	(contig_15 - 6556:8094)	(contig_5 - 54330:55691)	(contig_4 - 295645:296151)	(contig_2 - 384972:385520)	(contig_7 - 38799:39710)
170		H2-20-0153-1	582	survived	no MRSA	(contig_9 - 47149:47451)	0	0	0	0	0	0	0	0	0	0	0	0	0	(contig_2 - 272763:273953)	(contig_2 - 168928:170742)	(contig_1 - 239717:242743)	0	(contig_9 - 97572:97712)	0	0	0	(contig_13 - 3387:4190)	(contig_1 - 213552:214274)	(contig_9 - 98264:98881)	(contig_6 - 108398:108718)	(contig_4 - 138684:139970)	(contig_9 - 12455:12952)	(contig_2 - 63845:65323)	(contig_1 - 318871:319257)	0	(contig_3 - 361153:361953)	(contig_1 - 366705:367127)	(contig_2 - 492828:493460)	(contig_2 - 205652:206026)	(contig_10 - 7621:8034)	(contig_2 - 244786:245208)	(contig_1 - 396276:397244)	0	(contig_15 - 14586:16124)	0	(contig_2 - 441438:441944)	(contig_1 - 184944:185492)	(contig_6 - 38801:39712)
171		H2-18-0723-1	582	survived	no MRSA	0	0	0	0	0	0	0	0	0	0	0	0	0	0	(contig_5 - 230044:231234)	(contig_6 - 171056:172870)	(contig_2 - 326525:329551)	0	(contig_1 - 6046:6186)	0	0	0	(contig_13 - 33844:34647)	(contig_2 - 354984:355706)	(contig_1 - 4877:5494)	0	(contig_4 - 138725:140011)	(contig_1 - 86792:87289)	(contig_6 - 65993:67471)	(contig_2 - 250820:251206)	(contig_2 - 460925:461590)	(contig_3 - 412966:413766)	(contig_2 - 202950:203372)	(contig_5 - 10505:11137)	(contig_10 - 29799:30173)	(contig_9 - 75702:76115)	(contig_10 - 68933:69355)	(contig_2 - 172833:173801)	0	0	(contig_4 - 194086:195447)	(contig_5 - 62001:62507)	(contig_2 - 383766:384314)	(contig_7 - 38799:39710)
172		H4-17-0352-1	582	survived	no MRSA	0	0	0	0	0	0	0	0	0	0	0	0	0	0	(contig_1 - 667472:668662)	(contig_1 - 563636:565450)	(contig_4 - 240438:243464)	0	(contig_1 - 385726:385866)	0	0	0	(contig_10 - 33854:34657)	(contig_4 - 214284:215006)	(contig_1 - 386418:387035)	0	(contig_5 - 109763:111049)	(contig_1 - 303733:304230)	(contig_1 - 458573:460051)	(contig_3 - 67247:67633)	(contig_4 - 108405:109070)	(contig_2 - 20270:21070)	(contig_3 - 115081:115503)	(contig_1 - 887593:888225)	(contig_1 - 600361:600735)	(contig_8 - 7621:8034)	(contig_1 - 639495:639917)	(contig_3 - 144652:145620)	(contig_4 - 161074:161895)	(contig_11 - 6554:8092)	(contig_5 - 54328:55689)	(contig_1 - 836202:836708)	(contig_4 - 185676:186224)	(contig_7 - 90662:91573)
173		H2-18-0439-1	582	died	no MRSA	0	0	0	(contig_1 - 55955:56686)	0	0	0	0	0	0	0	0	0	0	(contig_4 - 15613:16803)	(contig_5 - 167350:169164)	(contig_7 - 7878:10904)	0	(contig_19 - 1234:1374)	0	(contig_1 - 68381:68452)	(contig_1 - 53577:54782)	(contig_14 - 4256:5059)	(contig_7 - 36336:37058)	(contig_19 - 65:682)	(contig_4 - 231699:232019)	(contig_6 - 138725:140011)	(contig_1 - 489459:489956)	(contig_5 - 62342:63820)	(contig_3 - 67305:67691)	(contig_7 - 142264:142929)	(contig_2 - 407182:407982)	(contig_3 - 115139:115561)	(contig_4 - 249090:249722)	(contig_5 - 204074:204448)	(contig_9 - 7654:8067)	(contig_5 - 243208:243630)	(contig_3 - 144709:145677)	(contig_7 - 89440:90261)	(contig_15 - 6554:8092)	(contig_6 - 194083:195444)	(contig_4 - 184342:184848)	(contig_7 - 65118:65666)	(contig_10 - 38799:39710)
174		H5-19-0377-1	582	survived	no MRSA	0	0	0	0	0	0	0	0	0	0	0	0	0	0	(contig_5 - 230680:231870)	(contig_1 - 661570:663384)	(contig_2 - 136154:139180)	0	(contig_1 - 483389:483529)	0	0	0	(contig_10 - 4357:5160)	(contig_2 - 110000:110722)	(contig_1 - 484081:484698)	0	(contig_4 - 109635:110921)	(contig_1 - 444443:444940)	(contig_1 - 556543:558021)	(contig_2 - 215252:215638)	(contig_2 - 4122:4787)	(contig_3 - 415683:416483)	(contig_2 - 263086:263508)	(contig_5 - 11185:11817)	(contig_1 - 698294:698668)	(contig_7 - 7654:8067)	(contig_1 - 737428:737850)	0	(contig_2 - 56790:57611)	(contig_11 - 14583:16121)	(contig_4 - 54330:55691)	(contig_5 - 62643:63149)	(contig_2 - 81392:81940)	(contig_6 - 90702:91613)
175		H2-17-0417-1	582	died	no MRSA	(contig_1 - 96181:96483)	0	0	0	0	0	0	0	0	0	0	0	0	0	(contig_3 - 102844:104034)	(contig_1 - 707662:709476)	(contig_4 - 7863:10889)	0	(contig_1 - 529713:529853)	0	0	(contig_1 - 53576:54781)	(contig_12 - 4357:5160)	(contig_4 - 36321:37043)	(contig_1 - 530405:531022)	0	(contig_6 - 109763:111049)	(contig_1 - 490767:491264)	(contig_1 - 602599:604077)	(contig_5 - 183095:183481)	(contig_4 - 142256:142921)	(contig_2 - 415743:416543)	(contig_5 - 135225:135647)	(contig_3 - 322872:323504)	(contig_15 - 9254:9628)	(contig_8 - 75700:76113)	(contig_3 - 74867:75289)	(contig_5 - 105108:106076)	(contig_4 - 89432:90253)	(contig_14 - 14583:16121)	(contig_6 - 54328:55689)	(contig_3 - 271564:272070)	(contig_4 - 65103:65651)	(contig_7 - 1525:2436)
176		H2-20-0656-1	582	survived	no MRSA	0	0	0	0	0	0	0	0	0	0	0	0	0	0	(contig_2 - 226725:227915)	(contig_2 - 329705:331519)	(contig_6 - 136143:139169)	0	(contig_1 - 6045:6185)	0	0	0	0	(contig_6 - 109989:110711)	(contig_1 - 4877:5494)	0	(contig_5 - 138608:139894)	(contig_1 - 44630:45127)	(contig_2 - 435104:436582)	(contig_4 - 250767:251153)	(contig_6 - 4111:4776)	(contig_3 - 20270:21070)	(contig_4 - 202897:203319)	(contig_2 - 7191:7823)	(contig_2 - 294652:295026)	(contig_9 - 75699:76112)	(contig_2 - 255470:255892)	(contig_4 - 172840:173808)	(contig_6 - 56779:57600)	(contig_13 - 14583:16121)	(contig_5 - 193968:195329)	(contig_2 - 58708:59214)	(contig_6 - 81381:81929)	(contig_7 - 90578:91489)
177		H5-20-0335-1	582	survived	no MRSA	0	0	0	0	0	0	0	0	0	0	0	0	0	0	(contig_6 - 15491:16681)	(contig_2 - 233478:235292)	(contig_9 - 7920:10946)	0	(contig_1 - 6047:6187)	0	(contig_8 - 116761:116832)	(contig_8 - 129471:130676)	(contig_15 - 33850:34653)	(contig_9 - 36378:37100)	(contig_1 - 4878:5495)	0	(contig_4 - 109782:111068)	(contig_1 - 44636:45133)	(contig_12 - 63607:65085)	(contig_3 - 250828:251214)	(contig_9 - 142313:142978)	(contig_5 - 201376:202176)	(contig_3 - 202958:203380)	(contig_17 - 10565:11197)	(contig_2 - 198194:198568)	(contig_11 - 75700:76113)	(contig_2 - 116183:116605)	(contig_3 - 172841:173809)	(contig_9 - 89489:90310)	(contig_18 - 6555:8093)	(contig_4 - 54329:55690)	(contig_6 - 184209:184715)	(contig_9 - 65160:65708)	(contig_10 - 38524:39435)
178		H5-19-0349-1	582	survived	no MRSA	0	0	0	0	0	0	0	0	0	0	0	0	0	0	0	(contig_4 - 163817:165631)	(contig_8 - 136089:139115)	0	(contig_1 - 14112:14252)	0	0	0	(contig_15 - 4357:5160)	(contig_8 - 109935:110657)	(contig_1 - 12943:13560)	0	(contig_9 - 16:1302)	(contig_1 - 52701:53198)	(contig_4 - 58754:60232)	(contig_2 - 67304:67690)	(contig_8 - 4057:4722)	(contig_5 - 20270:21070)	(contig_2 - 115138:115560)	(contig_3 - 235636:236268)	(contig_4 - 200541:200915)	(contig_13 - 7620:8033)	(contig_4 - 239675:240097)	(contig_2 - 144587:145555)	(contig_8 - 56725:57546)	(contig_16 - 14583:16121)	0	(contig_3 - 184245:184751)	(contig_8 - 81327:81875)	(contig_10 - 90700:91611)
179		H4-18-0130-1	582	survived	no MRSA	0	0	0	0	0	0	0	0	0	0	0	0	0	0	(contig_6 - 230017:231207)	(contig_4 - 158320:160134)	0	0	(contig_15 - 1234:1374)	0	0	0	(contig_10 - 33844:34647)	(contig_1 - 351315:352037)	(contig_15 - 65:682)	0	(contig_5 - 138725:140011)	(contig_2 - 444446:444943)	(contig_4 - 53746:55224)	(contig_1 - 250888:251274)	(contig_1 - 457252:457917)	(contig_3 - 20270:21070)	(contig_1 - 203018:203440)	(contig_6 - 10521:11153)	(contig_4 - 195044:195418)	(contig_8 - 75702:76115)	(contig_4 - 234178:234600)	(contig_1 - 172841:173809)	(contig_1 - 404426:405247)	(contig_11 - 14583:16121)	(contig_5 - 194083:195444)	(contig_6 - 62038:62544)	(contig_1 - 380097:380645)	(contig_7 - 90702:91613)
180		H2-18-0412-1	582	died	no MRSA	0	0	0	(contig_11 - 26181:26912)	0	0	0	0	0	0	0	0	0	0	(contig_5 - 15386:16576)	(contig_1 - 190489:192303)	(contig_6 - 7920:10946)	0	(contig_1 - 369765:369905)	0	(contig_11 - 38607:38678)	(contig_11 - 23803:25008)	(contig_12 - 4357:5160)	(contig_6 - 36378:37100)	(contig_1 - 368596:369213)	0	(contig_4 - 138664:139950)	(contig_1 - 408353:408850)	(contig_1 - 295382:296860)	(contig_3 - 67304:67690)	(contig_6 - 142315:142980)	(contig_2 - 20270:21070)	(contig_3 - 115138:115560)	(contig_5 - 229487:230119)	(contig_1 - 155205:155579)	(contig_8 - 75700:76113)	(contig_1 - 116023:116445)	(contig_3 - 144709:145677)	(contig_6 - 89489:90310)	(contig_13 - 14583:16121)	(contig_4 - 194024:195385)	(contig_5 - 184106:184612)	(contig_6 - 65160:65708)	(contig_7 - 38521:39432)
181		H2-19-0046-1	582	survived	no MRSA	0	0	0	0	0	0	0	0	0	0	0	0	0	0	(contig_25 - 15223:16413)	(contig_5 - 161583:163397)	(contig_8 - 7883:10909)	0	(contig_9 - 127736:127876)	0	(contig_1 - 161044:161115)	(contig_1 - 175003:176208)	(contig_20 - 3387:4190)	(contig_8 - 36341:37063)	(contig_9 - 128428:129045)	0	(contig_12 - 12478:13764)	(contig_9 - 88790:89287)	(contig_5 - 56538:58016)	(contig_11 - 50843:51229)	(contig_8 - 142276:142941)	(contig_2 - 201336:202136)	(contig_11 - 2973:3395)	(contig_3 - 155530:156162)	(contig_6 - 30541:30915)	(contig_16 - 7622:8035)	(contig_6 - 69675:70097)	(contig_15 - 25891:26859)	(contig_8 - 89452:90273)	(contig_27 - 6556:8094)	(contig_13 - 54330:55691)	(contig_3 - 110148:110654)	(contig_8 - 65123:65671)	(contig_14 - 22233:23144)
182		H2-17-0206-1	582	died	no MRSA	0	0	0	0	0	0	0	0	0	0	0	0	0	0	(contig_6 - 15519:16709)	(contig_3 - 190649:192463)	(contig_7 - 7920:10946)	0	(contig_16 - 1234:1374)	0	(contig_1 - 67330:67401)	(contig_1 - 53578:54783)	(contig_12 - 33845:34648)	(contig_7 - 36378:37100)	(contig_16 - 65:682)	0	(contig_5 - 109765:111051)	(contig_1 - 488429:488926)	(contig_3 - 296066:297544)	(contig_4 - 67304:67690)	(contig_7 - 142313:142978)	(contig_2 - 20270:21070)	(contig_4 - 115138:115560)	(contig_6 - 235615:236247)	(contig_3 - 155365:155739)	(contig_9 - 7621:8034)	(contig_3 - 116183:116605)	(contig_4 - 144709:145677)	(contig_7 - 89489:90310)	(contig_13 - 14583:16121)	(contig_5 - 54330:55691)	(contig_6 - 184224:184730)	(contig_7 - 65160:65708)	(contig_8 - 38521:39432)
183		H2-17-0422-1	582	survived	no MRSA	0	0	0	0	0	0	0	0	0	0	0	0	0	0	(contig_2 - 230055:231245)	(contig_6 - 168671:170485)	0	0	(contig_23 - 1234:1374)	0	0	0	(contig_18 - 33596:34399)	(contig_5 - 214319:215041)	(contig_23 - 65:682)	0	(contig_4 - 109763:111049)	(contig_12 - 37429:37926)	(contig_6 - 63608:65086)	(contig_3 - 67304:67690)	(contig_5 - 108441:109106)	(contig_1 - 367628:368428)	(contig_3 - 115137:115559)	(contig_2 - 10507:11139)	(contig_2 - 297982:298356)	(contig_10 - 75699:76112)	(contig_2 - 258800:259222)	(contig_3 - 144708:145676)	(contig_5 - 161109:161930)	(contig_19 - 14586:16124)	(contig_4 - 54328:55689)	(contig_2 - 62019:62525)	(contig_5 - 185711:186259)	(contig_9 - 90702:91613)
184		H4-18-0110-1	582	died	no MRSA	0	0	0	0	0	0	0	0	0	0	0	0	0	0	(contig_6 - 15604:16794)	(contig_3 - 171549:173363)	(contig_7 - 140368:143394)	0	(contig_16 - 1105:1245)	0	0	0	(contig_12 - 4386:5189)	(contig_7 - 114214:114936)	(contig_16 - 1797:2414)	0	(contig_5 - 138664:139950)	(contig_1 - 444219:444716)	(contig_3 - 66486:67964)	(contig_4 - 250829:251215)	(contig_7 - 8336:9001)	(contig_2 - 20269:21069)	(contig_4 - 202959:203381)	(contig_6 - 235700:236332)	(contig_3 - 208273:208647)	(contig_9 - 75689:76102)	(contig_3 - 247407:247829)	(contig_4 - 172842:173810)	(contig_7 - 61004:61825)	(contig_13 - 6556:8094)	(contig_5 - 194024:195385)	(contig_6 - 184310:184816)	(contig_7 - 85606:86154)	(contig_8 - 90702:91613)
185		H4-17-0231-1	582	survived	no MRSA	0	0	0	0	0	0	0	0	0	0	0	0	0	0	(contig_3 - 129625:130815)	(contig_1 - 661116:662930)	(contig_5 - 7913:10939)	0	(contig_1 - 483383:483523)	0	0	0	(contig_11 - 4357:5160)	(contig_5 - 36371:37093)	(contig_1 - 484075:484692)	0	(contig_6 - 109765:111051)	(contig_1 - 444437:444934)	(contig_1 - 556088:557566)	(contig_4 - 67304:67690)	(contig_5 - 142306:142971)	(contig_2 - 5635:6435)	(contig_4 - 115138:115560)	(contig_3 - 349736:350368)	(contig_3 - 19419:19793)	(contig_8 - 7622:8035)	(contig_3 - 101664:102086)	(contig_4 - 144709:145677)	(contig_5 - 89482:90303)	(contig_12 - 6557:8095)	(contig_6 - 54330:55691)	(contig_3 - 298345:298851)	(contig_5 - 65153:65701)	(contig_7 - 38521:39432)
186		H4-18-0157-1	582	survived	no MRSA	0	0	0	(contig_10 - 10005:10736)	0	0	0	0	0	0	0	0	0	0	(contig_5 - 15388:16578)	(contig_1 - 637995:639809)	(contig_2 - 253819:256845)	(contig_2 - 93047:93388)	(contig_1 - 459984:460124)	0	0	(contig_10 - 11909:13114)	(contig_11 - 4357:5160)	(contig_2 - 227665:228387)	(contig_1 - 460676:461293)	(contig_2 - 104229:104549)	(contig_4 - 138664:139950)	(contig_1 - 421170:421667)	(contig_1 - 532932:534410)	(contig_2 - 332974:333360)	(contig_2 - 121787:122452)	(contig_3 - 412020:412820)	(contig_2 - 380808:381230)	(contig_5 - 235460:236092)	(contig_1 - 674719:675093)	(contig_8 - 7654:8067)	(contig_7 - 63740:64162)	(contig_2 - 410379:411347)	(contig_2 - 174455:175276)	(contig_12 - 6556:8094)	(contig_4 - 194024:195385)	(contig_5 - 184108:184614)	(contig_2 - 199057:199605)	(contig_6 - 90701:91612)
187		H4-18-0120-1	582	survived	no MRSA	0	0	0	0	0	0	0	0	0	0	0	0	0	0	(contig_1 - 709064:710254)	(contig_1 - 605229:607043)	(contig_2 - 326575:329601)	0	(contig_1 - 427550:427690)	0	0	0	(contig_10 - 4357:5160)	(contig_2 - 355033:355755)	(contig_1 - 428242:428859)	0	(contig_4 - 138664:139950)	(contig_1 - 388736:389233)	(contig_1 - 500166:501644)	(contig_2 - 250828:251214)	(contig_2 - 460968:461633)	(contig_3 - 415833:416633)	(contig_2 - 202958:203380)	(contig_1 - 929119:929751)	(contig_1 - 641953:642327)	(contig_6 - 7654:8067)	(contig_1 - 681087:681509)	(contig_2 - 172841:173809)	(contig_2 - 408144:408965)	(contig_11 - 14583:16121)	(contig_4 - 194024:195385)	(contig_1 - 877728:878234)	(contig_2 - 383815:384363)	(contig_5 - 38521:39432)
188		H2-20-0169-1	582	died	no MRSA	0	0	0	0	0	0	0	0	0	0	0	0	0	0	(contig_6 - 230140:231330)	(contig_4 - 163612:165426)	(contig_2 - 136215:139241)	0	(contig_1 - 529153:529293)	0	0	0	(contig_11 - 4357:5160)	(contig_2 - 110061:110783)	(contig_1 - 529845:530462)	0	(contig_5 - 138725:140011)	(contig_1 - 490339:490836)	(contig_4 - 58549:60027)	(contig_2 - 214977:215363)	(contig_2 - 4183:4848)	(contig_3 - 416126:416926)	(contig_2 - 262880:263302)	(contig_6 - 10645:11277)	(contig_4 - 200336:200710)	(contig_8 - 75700:76113)	(contig_4 - 239427:239849)	(contig_2 - 292451:293419)	(contig_2 - 56851:57672)	(contig_12 - 6554:8092)	(contig_5 - 194085:195446)	(contig_6 - 62162:62668)	(contig_2 - 81453:82001)	(contig_7 - 38521:39432)
189		H4-17-0190-1	582	survived	no MRSA	0	0	0	0	0	0	0	0	0	0	0	0	0	0	(contig_1 - 810195:811385)	(contig_1 - 706360:708174)	(contig_4 - 7920:10946)	0	(contig_1 - 483195:483335)	0	(contig_1 - 640464:640535)	0	(contig_11 - 33844:34647)	(contig_4 - 36378:37100)	(contig_1 - 483887:484504)	0	(contig_5 - 138665:139951)	(contig_1 - 444381:444878)	(contig_1 - 556197:557675)	(contig_3 - 250832:251218)	(contig_4 - 142313:142978)	(contig_2 - 20270:21070)	(contig_3 - 202959:203381)	(contig_6 - 11043:11675)	(contig_1 - 743084:743458)	(contig_8 - 75700:76113)	(contig_1 - 782218:782640)	(contig_3 - 172842:173810)	0	(contig_12 - 14583:16121)	(contig_5 - 193966:195327)	(contig_6 - 62560:63066)	(contig_4 - 65160:65708)	(contig_7 - 90701:91612)
190		H4-17-0156-1	582	survived	no MRSA	0	0	0	0	0	0	0	0	0	0	0	0	0	(contig_3 - 51625:51990)	(contig_3 - 120783:121973)	(contig_6 - 25617:27431)	(contig_7 - 7920:10946)	0	(contig_19 - 166:306)	0	0	0	(contig_13 - 4357:5160)	(contig_7 - 36378:37100)	(contig_20 - 90:707)	0	(contig_5 - 109763:111049)	(contig_1 - 444346:444843)	(contig_6 - 131000:132478)	(contig_4 - 250828:251214)	(contig_7 - 142313:142978)	(contig_2 - 20270:21070)	(contig_4 - 202958:203380)	(contig_3 - 340894:341526)	(contig_3 - 9254:9628)	(contig_9 - 7621:8034)	(contig_3 - 92806:93228)	(contig_4 - 172841:173809)	(contig_7 - 89489:90310)	(contig_15 - 6498:8036)	(contig_5 - 54328:55689)	(contig_3 - 289503:290009)	(contig_7 - 65160:65708)	(contig_8 - 90702:91613)
191		H2-18-0630-1	582	died	no MRSA	0	0	0	0	0	0	0	0	0	0	0	0	0	0	(contig_2 - 272509:273699)	(contig_2 - 168674:170488)	(contig_1 - 240636:243662)	(contig_3 - 31096:31437)	(contig_12 - 7234:7374)	0	0	0	(contig_10 - 4357:5160)	(contig_1 - 214482:215204)	0	(contig_3 - 42278:42598)	(contig_5 - 109764:111050)	(contig_3 - 44525:45022)	(contig_2 - 63611:65089)	(contig_1 - 320175:320561)	(contig_1 - 108604:109269)	(contig_4 - 415753:416553)	(contig_1 - 368010:368432)	(contig_2 - 492563:493195)	(contig_2 - 205398:205772)	(contig_7 - 7654:8067)	(contig_2 - 244532:244954)	(contig_1 - 397581:398549)	(contig_1 - 161272:162093)	(contig_11 - 14583:16121)	(contig_5 - 54329:55690)	(contig_2 - 441172:441678)	(contig_1 - 185874:186422)	(contig_6 - 90701:91612)
192		H4-17-0405-1	582	survived	no MRSA	0	0	0	0	0	0	0	0	0	0	0	0	0	0	(contig_1 - 810489:811679)	(contig_1 - 706654:708468)	(contig_4 - 7920:10946)	0	0	0	0	0	(contig_10 - 4256:5059)	(contig_4 - 36378:37100)	(contig_1 - 529541:530158)	0	(contig_5 - 138664:139950)	(contig_1 - 489903:490400)	(contig_1 - 601592:603070)	(contig_3 - 250715:251101)	(contig_4 - 142313:142978)	(contig_2 - 20270:21070)	(contig_3 - 202845:203267)	(contig_1 - 1030544:1031176)	(contig_1 - 743378:743752)	(contig_7 - 75703:76116)	(contig_1 - 782512:782934)	(contig_3 - 172728:173696)	(contig_4 - 89489:90310)	(contig_11 - 6556:8094)	(contig_5 - 194024:195385)	(contig_1 - 979153:979659)	(contig_4 - 65160:65708)	(contig_6 - 90661:91572)
193		H4-17-0164-1	582	survived	no MRSA	0	0	0	0	0	0	0	0	0	0	0	0	0	(contig_1 - 247070:247435)	(contig_1 - 316313:317503)	(contig_1 - 168670:170484)	(contig_5 - 7831:10857)	0	(contig_2 - 342788:342928)	0	0	0	(contig_13 - 3387:4190)	(contig_5 - 36289:37011)	(contig_2 - 343480:344097)	0	(contig_6 - 109763:111049)	(contig_2 - 303843:304340)	(contig_1 - 63607:65085)	(contig_3 - 67304:67690)	(contig_5 - 142224:142889)	(contig_4 - 247686:248486)	(contig_3 - 115138:115560)	(contig_1 - 536477:537109)	(contig_1 - 205394:205768)	(contig_10 - 75700:76113)	(contig_1 - 288336:288758)	(contig_3 - 144709:145677)	(contig_5 - 89400:90221)	(contig_14 - 14586:16124)	(contig_6 - 54328:55689)	(contig_1 - 485087:485593)	(contig_5 - 65071:65619)	(contig_9 - 38523:39434)
194		H4-17-0441-1	582	died	no MRSA	0	0	0	0	0	0	0	0	0	0	0	0	0	0	(contig_2 - 234139:235329)	(contig_2 - 337350:339164)	(contig_5 - 240528:243554)	(contig_16 - 1353:1694)	(contig_1 - 483317:483457)	0	0	0	(contig_12 - 4256:5059)	(contig_5 - 214374:215096)	(contig_1 - 484009:484626)	(contig_17 - 3002:3322)	(contig_6 - 138665:139951)	(contig_1 - 444371:444868)	(contig_1 - 556606:558084)	(contig_3 - 48726:49112)	(contig_5 - 108497:109162)	(contig_4 - 248268:249068)	(contig_3 - 96559:96981)	(contig_2 - 14641:15273)	(contig_2 - 302066:302440)	(contig_14 - 7621:8034)	(contig_2 - 262884:263306)	(contig_3 - 126130:127098)	(contig_5 - 161165:161986)	(contig_13 - 6556:8094)	0	(contig_2 - 66158:66664)	(contig_5 - 185766:186314)	(contig_8 - 38521:39432)
195		H4-17-0105-1	582	died	no MRSA	0	0	0	(contig_2 - 55955:56686)	0	0	0	0	0	0	0	0	0	0	(contig_1 - 347892:349082)	(contig_1 - 494214:496028)	(contig_6 - 136128:139154)	(contig_1 - 257592:257933)	(contig_2 - 528404:528544)	0	(contig_2 - 68378:68449)	(contig_2 - 53577:54782)	(contig_11 - 33845:34648)	(contig_6 - 109974:110696)	(contig_2 - 529096:529713)	(contig_1 - 246431:246751)	(contig_5 - 109765:111051)	(contig_2 - 489458:489955)	(contig_1 - 599614:601092)	(contig_4 - 250825:251211)	(contig_6 - 4096:4761)	(contig_3 - 414834:415634)	(contig_4 - 202955:203377)	(contig_1 - 115055:115687)	(contig_1 - 458930:459304)	(contig_8 - 7654:8067)	(contig_1 - 376637:377059)	(contig_4 - 172838:173806)	(contig_6 - 56764:57585)	(contig_12 - 6556:8094)	(contig_5 - 54330:55691)	(contig_1 - 166568:167074)	(contig_6 - 81366:81914)	(contig_7 - 90700:91611)
196		H4-18-0329-1	15 (CC15)	survived	no MRSA	0	0	0	0	0	0	0	0	0	0	0	0	0	0	0	0	(contig_6 - 7920:10946)	0	0	0	(contig_1 - 501883:501954)	(contig_1 - 514812:516017)	(contig_14 - 4256:5059)	(contig_6 - 36380:37102)	0	0	(contig_5 - 109633:110919)	(contig_1 - 79197:79694)	(contig_10 - 80700:82178)	(contig_3 - 250729:251115)	(contig_6 - 142315:142980)	(contig_2 - 415882:416682)	(contig_3 - 203019:203441)	(contig_4 - 11063:11695)	(contig_8 - 83747:84121)	0	(contig_8 - 955:1377)	(contig_3 - 172902:173870)	(contig_6 - 89491:90312)	(contig_16 - 6556:8094)	(contig_5 - 54330:55691)	(contig_4 - 62580:63086)	(contig_6 - 65162:65710)	(contig_7 - 38799:39710)
197		H4-17-0273-1	15 (CC15)	died	no MRSA	0	0	0	0	0	0	0	0	0	0	0	0	0	0	0	0	(contig_2 - 327728:330754)	0	0	0	(contig_6 - 70784:70855)	0	(contig_12 - 4256:5059)	(contig_2 - 356187:356909)	0	0	(contig_4 - 109764:111050)	(contig_1 - 444348:444845)	(contig_1 - 529067:530545)	(contig_2 - 250829:251215)	(contig_2 - 462122:462787)	(contig_5 - 20270:21070)	(contig_2 - 202960:203382)	(contig_3 - 246538:247170)	(contig_11 - 31202:31576)	(contig_9 - 75702:76115)	(contig_11 - 70457:70879)	(contig_2 - 172843:173811)	(contig_2 - 409298:410119)	(contig_14 - 6556:8094)	(contig_4 - 54329:55690)	(contig_3 - 195148:195654)	(contig_2 - 384969:385517)	(contig_7 - 38682:39593)
198		H2-18-0100-1	15 (CC15)	died	no MRSA	0	0	0	0	0	0	0	0	0	0	0	0	0	0	0	0	(contig_2 - 240455:243481)	(contig_1 - 401595:401936)	0	0	0	0	(contig_13 - 4256:5059)	(contig_2 - 214300:215022)	0	(contig_1 - 390434:390754)	(contig_5 - 109763:111049)	(contig_1 - 453501:453998)	(contig_7 - 80712:82190)	(contig_2 - 319600:319986)	(contig_2 - 108448:109113)	(contig_3 - 411017:411817)	(contig_2 - 367434:367856)	(contig_4 - 246485:247117)	(contig_9 - 31176:31550)	(contig_8 - 7680:8093)	(contig_9 - 70426:70848)	(contig_2 - 397005:397973)	(contig_2 - 161090:161911)	(contig_15 - 6554:8092)	0	(contig_4 - 195094:195600)	(contig_2 - 185692:186240)	(contig_6 - 38798:39709)
199		H5-17-0122-1	15 (CC15)	died	no MRSA	0	0	0	0	0	0	0	0	0	0	0	0	0	0	0	0	(contig_6 - 7920:10946)	0	0	0	0	0	(contig_13 - 33845:34648)	(contig_6 - 36379:37101)	0	0	(contig_4 - 109706:110992)	(contig_1 - 166410:166907)	(contig_1 - 80584:82062)	(contig_5 - 67303:67689)	(contig_6 - 142313:142978)	(contig_2 - 20270:21070)	(contig_5 - 115138:115560)	(contig_3 - 246524:247156)	(contig_12 - 31232:31606)	(contig_10 - 75703:76116)	(contig_12 - 70431:70853)	(contig_5 - 144709:145677)	(contig_6 - 89489:90310)	(contig_16 - 14583:16121)	(contig_4 - 54330:55691)	(contig_3 - 195133:195639)	(contig_6 - 65160:65708)	(contig_9 - 1524:2435)
200		H1-17-0372-1	15 (CC15)	survived	no MRSA	0	0	0	0	0	0	0	0	0	0	0	0	0	0	0	0	(contig_2 - 323387:326413)	0	0	0	0	0	(contig_13 - 33844:34647)	(contig_2 - 351846:352568)	0	0	0	(contig_1 - 96277:96774)	(contig_8 - 80697:82175)	(contig_2 - 250826:251212)	(contig_2 - 457781:458446)	(contig_3 - 20331:21131)	(contig_2 - 202959:203381)	(contig_4 - 58600:59232)	(contig_10 - 40319:40693)	(contig_9 - 75701:76114)	(contig_10 - 1016:1438)	(contig_2 - 172842:173810)	(contig_2 - 404957:405778)	(contig_17 - 6552:8090)	0	(contig_4 - 110117:110623)	(contig_2 - 380628:381176)	(contig_6 - 90604:91515)
201		H3-17-0187-1	15 (CC15)	survived	no MRSA	0	0	0	0	0	0	0	0	0	0	0	0	0	0	0	0	0	0	0	0	0	0	(contig_14 - 4256:5059)	(contig_2 - 351847:352569)	0	0	0	(contig_1 - 444424:444921)	(contig_9 - 80857:82335)	(contig_2 - 250826:251212)	(contig_2 - 457819:458484)	(contig_5 - 222571:223371)	(contig_2 - 202959:203381)	(contig_3 - 235693:236325)	(contig_11 - 40258:40632)	(contig_10 - 75701:76114)	(contig_11 - 955:1377)	(contig_2 - 172842:173810)	(contig_2 - 404958:405779)	(contig_17 - 6556:8094)	(contig_4 - 193643:195004)	(contig_3 - 184261:184767)	(contig_2 - 380629:381177)	(contig_7 - 90661:91572)
202		H2-18-0608-1	15 (CC15)	survived	no MRSA	0	0	0	(contig_12 - 8948:9679)	0	0	0	0	0	0	0	0	0	0	0	0	0	0	0	0	(contig_6 - 167317:167388)	0	(contig_14 - 33845:34648)	0	0	0	(contig_4 - 109502:110788)	(contig_1 - 166473:166970)	(contig_1 - 80584:82062)	(contig_2 - 250617:251003)	(contig_2 - 458026:458691)	(contig_5 - 20270:21070)	(contig_2 - 202747:203169)	(contig_3 - 10601:11233)	(contig_10 - 31233:31607)	(contig_9 - 75729:76142)	(contig_15 - 955:1377)	(contig_2 - 172811:173779)	(contig_2 - 405202:406023)	(contig_17 - 16529:18067)	(contig_4 - 54329:55690)	(contig_3 - 62115:62621)	(contig_2 - 380873:381421)	(contig_7 - 90718:91629)
203		H4-18-0112-1	15 (CC15)	survived	no MRSA	0	0	0	0	0	0	0	0	0	0	0	0	0	0	0	0	0	0	0	0	0	0	(contig_25 - 3387:4190)	(contig_24 - 36322:37044)	0	0	(contig_1 - 109503:110789)	(contig_9 - 37371:37868)	(contig_11 - 4883:6361)	(contig_13 - 50816:51202)	(contig_2 - 103317:103982)	(contig_8 - 97371:98171)	(contig_13 - 2946:3368)	(contig_4 - 161537:162169)	(contig_15 - 31233:31607)	(contig_18 - 41139:41552)	(contig_15 - 70489:70911)	(contig_16 - 24730:25698)	(contig_2 - 50493:51314)	(contig_31 - 6556:8094)	(contig_1 - 54330:55691)	(contig_4 - 110148:110654)	(contig_2 - 26164:26712)	0
204		H5-18-0272-1	15 (CC15)	survived	no MRSA	0	0	0	0	0	0	0	0	0	0	0	0	0	0	0	0	(contig_4 - 7857:10883)	(contig_4 - 109531:109872)	0	0	0	0	(contig_12 - 33845:34648)	(contig_4 - 36316:37038)	0	(contig_4 - 98371:98691)	(contig_5 - 138571:139857)	(contig_1 - 444339:444836)	(contig_1 - 528995:530473)	(contig_3 - 66430:66816)	(contig_4 - 155592:156257)	(contig_2 - 20270:21070)	(contig_3 - 114264:114686)	(contig_6 - 240364:240996)	(contig_10 - 31233:31607)	(contig_8 - 75693:76106)	(contig_10 - 70489:70911)	(contig_3 - 143833:144801)	(contig_4 - 89427:90248)	0	(contig_5 - 193931:195292)	(contig_6 - 195044:195550)	(contig_4 - 65098:65646)	(contig_7 - 90405:91316)
205		H4-18-0415-1	15 (CC15)	survived	no MRSA	0	0	0	0	0	0	0	0	0	0	0	0	0	0	0	0	(contig_6 - 8223:11249)	0	0	0	0	0	(contig_12 - 4256:5059)	(contig_6 - 36682:37404)	0	0	(contig_2 - 109635:110921)	(contig_5 - 88868:89365)	(contig_5 - 173776:175254)	(contig_3 - 67317:67703)	(contig_6 - 142617:143282)	(contig_7 - 20259:21059)	(contig_3 - 115150:115572)	(contig_4 - 58654:59286)	(contig_11 - 31176:31550)	(contig_10 - 75703:76116)	(contig_11 - 70488:70910)	(contig_3 - 144721:145689)	(contig_6 - 89793:90614)	0	(contig_2 - 54330:55691)	(contig_4 - 110171:110677)	(contig_6 - 65464:66012)	(contig_9 - 38521:39432)
206		H4-18-0268-1	15 (CC15)	survived	no MRSA	0	0	0	0	0	0	0	0	0	0	0	0	0	0	0	0	(contig_6 - 136102:139128)	0	0	0	0	0	(contig_11 - 33745:34548)	(contig_6 - 109947:110669)	0	0	(contig_3 - 109633:110919)	(contig_1 - 443185:443682)	(contig_1 - 528093:529571)	(contig_4 - 67317:67703)	(contig_6 - 4069:4734)	(contig_2 - 20259:21059)	(contig_4 - 115150:115572)	(contig_5 - 59033:59665)	(contig_10 - 40376:40750)	(contig_9 - 7679:8092)	(contig_10 - 1016:1438)	(contig_4 - 144721:145689)	(contig_6 - 56737:57558)	0	(contig_3 - 54328:55689)	(contig_5 - 110550:111056)	(contig_6 - 81339:81887)	(contig_7 - 38521:39432)
207		H4-18-0220-1	15 (CC15)	survived	no MRSA	0	0	0	0	0	0	0	0	0	0	0	0	0	0	0	0	(contig_6 - 8226:11252)	0	0	0	0	0	(contig_11 - 33588:34391)	(contig_6 - 36685:37407)	0	0	(contig_3 - 217612:218898)	(contig_1 - 443185:443682)	(contig_1 - 528093:529571)	(contig_4 - 67317:67703)	(contig_6 - 142620:143285)	(contig_2 - 415917:416717)	(contig_4 - 115150:115572)	(contig_5 - 59087:59719)	(contig_10 - 40376:40750)	(contig_9 - 75703:76116)	(contig_10 - 1016:1438)	(contig_4 - 144721:145689)	(contig_6 - 89796:90617)	0	(contig_3 - 272842:274203)	(contig_5 - 110604:111110)	(contig_6 - 65467:66015)	(contig_7 - 38521:39432)
208		H2-20-0672-1	15 (CC15)	survived	no MRSA	(contig_1 - 558211:558513)	0	0	0	0	0	0	0	0	0	0	0	0	0	0	0	(contig_6 - 7920:10946)	0	0	0	0	(contig_1 - 599629:600834)	(contig_13 - 33845:34648)	(contig_6 - 36378:37100)	0	0	(contig_5 - 138566:139852)	(contig_1 - 166718:167215)	(contig_1 - 80699:82177)	(contig_4 - 250608:250994)	(contig_6 - 142313:142978)	(contig_2 - 416018:416818)	(contig_4 - 202742:203164)	(contig_3 - 246539:247171)	(contig_11 - 40259:40633)	(contig_9 - 7654:8067)	(contig_11 - 954:1376)	(contig_4 - 172726:173694)	(contig_6 - 89489:90310)	0	(contig_5 - 193867:195228)	(contig_3 - 195149:195655)	(contig_6 - 65160:65708)	(contig_7 - 38799:39710)
209		H2-18-0621-1	15 (CC15)	survived	no MRSA	(contig_1 - 137303:137605)	0	0	0	0	0	0	0	0	0	0	0	0	0	0	0	(contig_5 - 240570:243596)	0	0	0	0	(contig_1 - 94698:95903)	(contig_13 - 33588:34391)	(contig_5 - 214416:215138)	0	0	(contig_6 - 109636:110922)	(contig_1 - 528253:528750)	(contig_1 - 613161:614639)	(contig_3 - 9742:10128)	(contig_5 - 108538:109203)	(contig_2 - 415918:416718)	(contig_3 - 57574:57996)	(contig_4 - 246431:247063)	(contig_10 - 31233:31607)	(contig_8 - 7621:8034)	(contig_10 - 70490:70912)	(contig_3 - 87145:88113)	(contig_5 - 161206:162027)	(contig_15 - 16531:18069)	(contig_6 - 54260:55621)	(contig_4 - 195040:195546)	(contig_5 - 185808:186356)	(contig_7 - 90721:91632)
210		H5-18-0375-1	15 (CC15)	died	no MRSA	0	0	0	0	0	0	0	0	0	0	0	0	0	0	0	0	(contig_6 - 7920:10946)	0	0	0	0	0	(contig_13 - 33745:34548)	(contig_6 - 36379:37101)	0	0	(contig_4 - 138723:140009)	(contig_1 - 166586:167083)	(contig_1 - 80698:82176)	(contig_5 - 101974:102360)	(contig_6 - 142304:142969)	(contig_2 - 415707:416507)	(contig_5 - 54104:54526)	(contig_3 - 62636:63268)	(contig_12 - 40319:40693)	(contig_10 - 75702:76115)	(contig_12 - 1015:1437)	(contig_5 - 23987:24955)	(contig_6 - 89490:90311)	(contig_15 - 6554:8092)	(contig_4 - 194083:195444)	(contig_3 - 114153:114659)	(contig_6 - 65161:65709)	(contig_8 - 38799:39710)
211		H2-20-0554-1	15 (CC15)	died	no MRSA	0	0	0	0	0	0	0	0	0	0	0	0	0	0	0	0	0	(contig_3 - 14473:14814)	0	0	0	0	(contig_13 - 3387:4190)	(contig_2 - 214577:215299)	0	(contig_3 - 25655:25975)	(contig_4 - 138684:139970)	(contig_1 - 444321:444818)	(contig_1 - 529166:530644)	(contig_2 - 319119:319505)	(contig_2 - 108699:109364)	(contig_5 - 20270:21070)	(contig_2 - 366953:367375)	(contig_3 - 257776:258408)	(contig_9 - 40258:40632)	(contig_10 - 75702:76115)	(contig_9 - 954:1376)	(contig_2 - 396524:397492)	(contig_2 - 161367:162188)	(contig_14 - 6555:8093)	(contig_4 - 193914:195275)	(contig_3 - 206385:206891)	(contig_2 - 185969:186517)	(contig_7 - 90405:91316)
212		H2-20-0248-1	-	died	no MRSA	0	0	0	0	0	0	0	0	0	0	0	0	0	0	0	0	(contig_1 - 325565:328591)	0	0	0	(contig_6 - 29780:29851)	0	(contig_16 - 33649:34452)	(contig_1 - 354024:354746)	0	0	(contig_5 - 12478:13764)	(contig_2 - 388210:388707)	(contig_8 - 4766:6244)	(contig_1 - 250690:251076)	(contig_1 - 459959:460624)	(contig_13 - 20270:21070)	(contig_1 - 202820:203242)	(contig_4 - 246546:247178)	(contig_10 - 40259:40633)	(contig_9 - 7621:8034)	(contig_10 - 955:1377)	(contig_1 - 172824:173792)	(contig_1 - 407135:407956)	(contig_19 - 16015:17553)	(contig_7 - 54330:55691)	(contig_4 - 195155:195661)	(contig_1 - 382806:383354)	(contig_12 - 38408:39319)
213		H2-20-0544-1	15 (CC15)	survived	no MRSA	(contig_1 - 561192:561494)	0	0	0	0	0	0	0	0	0	0	0	0	0	0	0	0	0	0	0	(contig_1 - 589040:589111)	(contig_1 - 602602:603807)	(contig_13 - 33845:34648)	0	0	0	(contig_4 - 109366:110652)	(contig_1 - 166522:167019)	(contig_1 - 80697:82175)	(contig_2 - 64250:64636)	0	0	(contig_2 - 112084:112506)	(contig_3 - 246486:247118)	(contig_11 - 31204:31578)	(contig_9 - 7621:8034)	(contig_11 - 70516:70938)	(contig_2 - 141655:142623)	0	(contig_15 - 16528:18066)	0	0	0	(contig_7 - 90405:91316)
214		H5-20-0415-1	15 (CC15)	died	no MRSA	(contig_11 - 28730:29032)	0	0	0	0	0	0	0	0	0	0	0	0	0	0	0	(contig_1 - 327344:330370)	0	0	0	0	0	(contig_15 - 4256:5059)	(contig_1 - 355803:356525)	0	0	(contig_4 - 138663:139949)	(contig_11 - 63418:63915)	(contig_6 - 54480:55958)	(contig_1 - 250829:251215)	(contig_1 - 461739:462404)	(contig_5 - 20327:21127)	(contig_1 - 202959:203381)	(contig_3 - 11078:11710)	(contig_9 - 52858:53232)	(contig_10 - 7678:8091)	(contig_19 - 955:1377)	(contig_1 - 172842:173810)	(contig_1 - 408915:409736)	0	(contig_4 - 194023:195384)	(contig_3 - 62595:63101)	(contig_1 - 384585:385133)	(contig_7 - 90720:91631)
215		H4-17-0088-1	15 (CC15)	survived	no MRSA	0	0	0	0	0	0	0	0	0	0	0	0	0	0	0	0	(contig_5 - 240481:243507)	0	0	0	0	0	(contig_14 - 33731:34534)	(contig_5 - 214326:215048)	0	0	(contig_2 - 217951:219237)	0	(contig_10 - 80698:82176)	(contig_3 - 250837:251223)	(contig_5 - 108449:109114)	(contig_6 - 20270:21070)	(contig_3 - 202898:203320)	(contig_4 - 246338:246970)	(contig_12 - 31233:31607)	(contig_11 - 75701:76114)	(contig_12 - 70489:70911)	(contig_3 - 172842:173810)	(contig_5 - 161117:161938)	(contig_16 - 6556:8094)	(contig_2 - 273179:274540)	(contig_4 - 195037:195543)	(contig_5 - 185718:186266)	(contig_9 - 38802:39713)
216		H2-18-0464-1	15 (CC15)	survived	no MRSA	0	0	0	0	0	0	0	0	0	0	0	0	0	0	0	0	0	0	0	0	0	0	(contig_15 - 33662:34465)	(contig_6 - 214272:214994)	0	0	(contig_5 - 138663:139949)	(contig_1 - 419839:420336)	(contig_1 - 504743:506221)	(contig_2 - 67246:67632)	(contig_6 - 108394:109059)	(contig_4 - 20270:21070)	(contig_2 - 115080:115502)	(contig_3 - 259899:260531)	(contig_10 - 40264:40638)	(contig_9 - 7621:8034)	(contig_10 - 955:1377)	(contig_2 - 144650:145618)	(contig_6 - 161062:161883)	(contig_17 - 16529:18067)	(contig_5 - 194023:195384)	(contig_3 - 208577:209083)	(contig_6 - 185664:186212)	(contig_8 - 90762:91673)
217		H4-18-0008-1	15 (CC15)	survived	no MRSA	(contig_1 - 342107:342409)	0	0	0	0	0	0	0	0	0	0	0	0	0	0	0	(contig_7 - 7860:10886)	0	0	0	(contig_1 - 314489:314560)	0	(contig_15 - 33845:34648)	0	0	0	(contig_5 - 138724:140010)	(contig_3 - 166272:166769)	(contig_3 - 80698:82176)	(contig_2 - 250826:251212)	(contig_7 - 142253:142918)	(contig_1 - 20269:21069)	(contig_2 - 202956:203378)	(contig_14 - 10604:11236)	(contig_12 - 31232:31606)	(contig_10 - 75702:76115)	(contig_12 - 70544:70966)	(contig_2 - 172839:173807)	(contig_7 - 89429:90250)	(contig_17 - 16529:18067)	(contig_5 - 194084:195445)	(contig_6 - 195151:195657)	(contig_7 - 65101:65649)	(contig_8 - 38788:39699)
218		H4-17-0091-1	15 (CC15)	died	no MRSA	0	0	0	(contig_20 - 26181:26912)	0	0	0	0	0	0	0	0	0	0	0	0	(contig_31 - 9457:12483)	0	0	0	(contig_20 - 38604:38675)	(contig_20 - 23803:25008)	(contig_40 - 2373:3176)	(contig_6 - 15982:16704)	0	(contig_39 - 488:808)	(contig_1 - 138663:139949)	(contig_5 - 4714:5211)	(contig_5 - 89367:90845)	(contig_12 - 64280:64666)	(contig_6 - 121917:122582)	(contig_29 - 5585:6385)	(contig_3 - 135210:135632)	(contig_21 - 10826:11458)	(contig_13 - 31234:31608)	(contig_10 - 7622:8035)	(contig_13 - 70490:70912)	(contig_3 - 105108:106076)	(contig_6 - 69093:69914)	(contig_30 - 16529:18067)	(contig_1 - 193891:195252)	(contig_37 - 13376:13882)	(contig_6 - 44764:45312)	(contig_43 - 2479:3390)
219		H4-17-0396-1	15 (CC15)	survived	no MRSA	0	0	0	0	0	0	0	0	0	0	0	0	0	0	0	0	(contig_5 - 240620:243646)	0	0	0	0	0	(contig_13 - 4256:5059)	(contig_5 - 214465:215187)	0	0	(contig_6 - 109763:111049)	0	(contig_1 - 290683:292161)	(contig_3 - 67362:67748)	(contig_5 - 108587:109252)	(contig_10 - 57642:58442)	(contig_3 - 115196:115618)	0	(contig_12 - 31238:31612)	(contig_9 - 7626:8039)	(contig_12 - 70494:70916)	(contig_3 - 144585:145553)	(contig_5 - 161255:162076)	(contig_15 - 6554:8092)	0	(contig_4 - 195150:195656)	(contig_5 - 185857:186405)	(contig_8 - 38800:39711)
220		H3-17-0327-1	-	survived	no MRSA	0	0	0	0	0	0	0	0	0	0	0	0	0	0	0	0	0	0	0	0	0	0	(contig_12 - 33845:34648)	(contig_6 - 110026:110748)	0	0	(contig_4 - 138723:140009)	(contig_1 - 166472:166969)	(contig_1 - 80583:82061)	(contig_6 - 214608:214994)	0	(contig_2 - 20269:21069)	(contig_5 - 42883:43305)	(contig_3 - 66468:67100)	(contig_11 - 31232:31606)	(contig_9 - 7681:8094)	(contig_11 - 70488:70910)	(contig_5 - 72454:73422)	(contig_6 - 56815:57636)	(contig_15 - 6555:8093)	(contig_4 - 194083:195444)	(contig_3 - 117985:118491)	(contig_6 - 81418:81966)	(contig_7 - 90721:91632)
221		H3-17-0206-1	15 (CC15)	survived	no MRSA	0	0	0	0	0	0	0	0	0	0	0	0	0	0	0	0	0	0	0	0	0	0	(contig_14 - 4256:5059)	(contig_2 - 354986:355708)	0	0	(contig_5 - 138609:139895)	(contig_1 - 444160:444657)	(contig_1 - 528627:530105)	(contig_2 - 250781:251167)	(contig_2 - 460924:461589)	(contig_3 - 20269:21069)	(contig_2 - 202911:203333)	(contig_4 - 10611:11243)	(contig_10 - 40416:40790)	(contig_8 - 75702:76115)	(contig_10 - 1112:1534)	(contig_2 - 172794:173762)	(contig_2 - 408100:408921)	(contig_16 - 6433:7971)	(contig_5 - 193969:195330)	(contig_4 - 57981:58487)	(contig_2 - 383768:384316)	(contig_6 - 38799:39710)
222		H2-17-0430-1	15 (CC15)	died	no MRSA	0	0	0	0	0	0	0	0	0	0	0	0	0	0	0	0	(contig_6 - 136166:139192)	0	0	0	0	0	(contig_14 - 4256:5059)	(contig_6 - 110011:110733)	0	0	(contig_5 - 138552:139838)	(contig_1 - 444481:444978)	(contig_1 - 529388:530866)	(contig_3 - 250762:251148)	(contig_6 - 4133:4798)	(contig_2 - 20271:21071)	(contig_3 - 202895:203317)	(contig_4 - 246521:247153)	(contig_11 - 31233:31607)	(contig_9 - 7621:8034)	(contig_11 - 70489:70911)	(contig_3 - 172780:173748)	(contig_6 - 56801:57622)	(contig_16 - 16528:18066)	(contig_5 - 193782:195143)	(contig_4 - 195152:195658)	(contig_6 - 81403:81951)	(contig_7 - 38799:39710)
223		H2-20-0444-1	15 (CC15)	survived	no MRSA	0	0	0	0	0	0	0	0	0	0	0	0	0	0	0	0	(contig_6 - 140212:143238)	0	0	0	(contig_1 - 496:567)	(contig_13 - 53578:54783)	(contig_17 - 33845:34648)	(contig_6 - 114057:114779)	0	0	(contig_5 - 109763:111049)	(contig_1 - 421520:422017)	(contig_9 - 4935:6413)	(contig_3 - 67309:67695)	(contig_6 - 8174:8839)	(contig_2 - 415882:416682)	(contig_3 - 115143:115565)	(contig_4 - 245523:246155)	(contig_12 - 31233:31607)	(contig_10 - 75702:76115)	(contig_12 - 70433:70855)	(contig_3 - 144702:145670)	(contig_6 - 60842:61663)	(contig_19 - 6554:8092)	(contig_5 - 54328:55689)	(contig_4 - 195206:195712)	(contig_6 - 85449:85997)	(contig_8 - 1524:2435)
224		H2-20-0150-1	15 (CC15)	survived	no MRSA	0	0	0	0	0	0	0	0	0	0	0	0	0	0	0	0	0	0	0	0	0	0	(contig_15 - 4256:5059)	(contig_6 - 32822:33544)	0	0	(contig_4 - 138664:139950)	(contig_1 - 444305:444802)	(contig_9 - 32630:34108)	(contig_3 - 67246:67632)	(contig_6 - 138759:139424)	(contig_2 - 415966:416766)	(contig_3 - 115087:115509)	(contig_5 - 235560:236192)	(contig_12 - 31233:31607)	(contig_10 - 75704:76117)	(contig_12 - 70490:70912)	(contig_3 - 144658:145626)	(contig_6 - 85933:86754)	(contig_18 - 16529:18067)	(contig_4 - 194024:195385)	(contig_5 - 184170:184676)	(contig_6 - 61604:62152)	(contig_7 - 90720:91631)
225		H5-17-0290-1	15 (CC15)	survived	no MRSA	0	0	0	0	0	0	0	0	0	0	0	0	0	0	0	0	0	0	0	0	0	0	(contig_17 - 33845:34648)	(contig_3 - 11972:12694)	0	0	(contig_5 - 44936:46222)	(contig_7 - 51826:52323)	(contig_9 - 80583:82061)	(contig_2 - 250823:251209)	(contig_3 - 117907:118572)	(contig_1 - 408806:409606)	(contig_2 - 202956:203378)	(contig_19 - 16847:17479)	(contig_13 - 19562:19936)	(contig_12 - 7621:8034)	(contig_13 - 58762:59184)	(contig_2 - 172839:173807)	(contig_3 - 65083:65904)	(contig_20 - 6556:8094)	(contig_5 - 100296:101657)	(contig_6 - 20028:20534)	0	(contig_8 - 90721:91632)
226		H1-17-0487-1	15 (CC15)	survived	no MRSA	0	0	0	0	0	0	0	0	0	0	0	0	0	0	0	0	0	0	0	0	0	0	(contig_12 - 4256:5059)	(contig_6 - 214327:215049)	0	0	(contig_5 - 109762:111048)	(contig_1 - 166522:167019)	(contig_1 - 80698:82176)	(contig_3 - 67304:67690)	(contig_6 - 108448:109113)	(contig_2 - 415788:416588)	(contig_3 - 115138:115560)	(contig_4 - 246541:247173)	(contig_8 - 83080:83454)	(contig_9 - 75702:76115)	(contig_8 - 1016:1438)	(contig_3 - 144709:145677)	(contig_6 - 161116:161937)	(contig_14 - 16529:18067)	(contig_5 - 54328:55689)	(contig_4 - 195150:195656)	(contig_6 - 185718:186266)	(contig_7 - 90406:91317)
227		H2-18-0640-1	15 (CC15)	survived	no MRSA	0	0	0	0	0	0	0	0	0	0	0	0	0	0	0	0	0	0	0	0	0	0	(contig_14 - 4256:5059)	(contig_6 - 109949:110671)	0	0	(contig_5 - 109762:111048)	(contig_1 - 444545:445042)	(contig_1 - 529391:530869)	(contig_3 - 250708:251094)	(contig_6 - 4071:4736)	(contig_2 - 415037:415837)	(contig_3 - 202838:203260)	(contig_4 - 14944:15576)	(contig_9 - 31232:31606)	(contig_10 - 75702:76115)	(contig_9 - 86298:86720)	(contig_3 - 172841:173809)	(contig_6 - 56739:57560)	0	(contig_5 - 54327:55688)	(contig_4 - 66440:66946)	(contig_6 - 81341:81889)	(contig_7 - 90607:91518)
228		H2-19-0017-1	15 (CC15)	died	no MRSA	0	0	0	0	0	0	0	0	0	0	0	0	0	0	0	0	0	0	0	0	(contig_2 - 314657:314728)	0	(contig_12 - 33859:34662)	(contig_5 - 36385:37107)	0	0	(contig_6 - 138727:140013)	(contig_1 - 443954:444451)	(contig_1 - 528861:530339)	(contig_3 - 67316:67702)	(contig_5 - 142319:142984)	(contig_2 - 20269:21069)	(contig_3 - 115150:115572)	(contig_4 - 245242:245874)	(contig_8 - 40203:40577)	(contig_9 - 7654:8067)	(contig_8 - 955:1377)	(contig_3 - 144721:145689)	(contig_5 - 89496:90317)	(contig_15 - 16528:18066)	(contig_6 - 193692:195053)	(contig_4 - 194935:195441)	(contig_5 - 65167:65715)	(contig_7 - 38540:39451)
229		H5-19-0336-1	15 (CC15)	survived	no MRSA	0	0	0	0	0	0	0	0	0	0	0	0	0	0	0	0	0	0	0	0	0	0	(contig_15 - 4256:5059)	(contig_3 - 287903:288625)	0	0	(contig_5 - 109764:111050)	(contig_1 - 79348:79845)	(contig_11 - 47870:49348)	(contig_3 - 182927:183313)	(contig_3 - 393838:394503)	(contig_2 - 414958:415758)	(contig_3 - 135223:135645)	(contig_4 - 246540:247172)	(contig_8 - 40258:40632)	(contig_7 - 75700:76113)	(contig_8 - 954:1376)	(contig_3 - 105106:106074)	(contig_3 - 341014:341835)	(contig_18 - 6554:8092)	(contig_5 - 54329:55690)	(contig_4 - 195150:195656)	(contig_3 - 316685:317233)	(contig_14 - 22235:23146)
230		H2-17-0536-1	15 (CC15)	died	no MRSA	0	0	0	0	0	0	0	0	0	0	0	0	0	0	0	0	(contig_24 - 27766:30792)	(contig_27 - 21736:22077)	0	0	0	0	(contig_26 - 33275:34078)	(contig_24 - 1614:2336)	0	(contig_27 - 10575:10895)	(contig_3 - 12478:13764)	(contig_8 - 79179:79676)	(contig_12 - 80584:82062)	(contig_15 - 24198:24584)	(contig_9 - 103315:103980)	(contig_7 - 20270:21070)	(contig_15 - 72032:72454)	(contig_1 - 11035:11667)	(contig_16 - 40307:40681)	(contig_21 - 41140:41553)	(contig_16 - 955:1377)	(contig_18 - 24730:25698)	(contig_9 - 50491:51312)	(contig_35 - 6556:8094)	(contig_10 - 40991:42352)	(contig_1 - 62552:63058)	(contig_9 - 26164:26712)	(contig_17 - 22235:23146)
231		H1-17-0402-1	15 (CC15)	died	no MRSA	0	0	0	0	0	0	0	0	0	0	0	0	0	0	0	0	0	0	0	0	0	0	(contig_12 - 4256:5059)	(contig_6 - 27248:27970)	0	0	(contig_5 - 109762:111048)	(contig_1 - 166710:167207)	(contig_1 - 80696:82174)	(contig_3 - 67370:67756)	(contig_6 - 133182:133847)	(contig_2 - 20269:21069)	(contig_3 - 115207:115629)	(contig_4 - 66605:67237)	(contig_10 - 40320:40694)	(contig_8 - 75702:76115)	(contig_10 - 1016:1438)	(contig_3 - 144776:145744)	(contig_6 - 80358:81179)	(contig_14 - 15071:16609)	(contig_5 - 54327:55688)	(contig_4 - 118126:118632)	(contig_6 - 56030:56578)	(contig_7 - 90780:91691)
232		H4-18-0106-1	15 (CC15)	survived	no MRSA	(contig_1 - 338940:339242)	0	0	(contig_1 - 299378:300109)	0	0	0	0	0	0	0	0	0	0	0	0	0	0	0	0	(contig_1 - 311322:311393)	0	(contig_15 - 21279:22082)	0	0	0	(contig_5 - 138724:140010)	(contig_6 - 78186:78683)	(contig_6 - 163095:164573)	(contig_2 - 251568:251954)	(contig_2 - 461711:462376)	(contig_1 - 20269:21069)	(contig_2 - 203698:204120)	(contig_3 - 10695:11327)	(contig_12 - 31232:31606)	(contig_10 - 75701:76114)	(contig_12 - 70488:70910)	(contig_2 - 173581:174549)	(contig_2 - 408887:409708)	(contig_16 - 6616:8154)	(contig_5 - 194084:195445)	(contig_3 - 62273:62779)	(contig_2 - 384557:385105)	0
233		H2-17-0566-1	15 (CC15)	died	no MRSA	(contig_4 - 187376:187678)	0	0	0	0	0	0	0	0	0	0	0	0	0	0	0	0	0	0	0	(contig_4 - 215225:215296)	(contig_4 - 228187:229392)	(contig_14 - 4256:5059)	(contig_10 - 88908:89630)	0	0	(contig_5 - 109765:111051)	(contig_7 - 166580:167077)	(contig_7 - 80700:82178)	(contig_2 - 66904:67290)	(contig_9 - 110048:110713)	(contig_1 - 20271:21071)	(contig_2 - 114739:115161)	(contig_3 - 246372:247004)	(contig_13 - 31345:31719)	(contig_11 - 7622:8035)	(contig_13 - 70541:70963)	(contig_2 - 144311:145279)	(contig_10 - 35698:36519)	(contig_16 - 16529:18067)	(contig_5 - 54330:55691)	(contig_3 - 194981:195487)	(contig_10 - 60300:60848)	(contig_8 - 38799:39710)
234		H2-17-0314-1	15 (CC15)	survived	no MRSA	0	0	0	0	0	0	0	0	0	0	0	0	0	0	0	0	0	0	0	0	0	0	(contig_14 - 4256:5059)	(contig_2 - 109967:110689)	0	0	(contig_4 - 138746:140032)	(contig_1 - 166282:166779)	(contig_1 - 80582:82060)	(contig_2 - 214508:214894)	(contig_2 - 4089:4754)	(contig_3 - 357047:357847)	(contig_2 - 262342:262764)	(contig_5 - 150565:151197)	(contig_7 - 31176:31550)	(contig_10 - 7680:8093)	(contig_7 - 113150:113572)	(contig_2 - 291913:292881)	(contig_2 - 56757:57578)	(contig_18 - 16529:18067)	(contig_4 - 194106:195467)	(contig_5 - 102204:102710)	(contig_2 - 81359:81907)	(contig_6 - 55220:56131)
235		H4-18-0301-1	15 (CC15)	survived	no MRSA	(contig_3 - 94795:95097)	0	0	0	0	0	0	0	0	0	0	0	0	0	0	0	0	0	0	0	0	(contig_3 - 53578:54783)	(contig_14 - 33588:34391)	(contig_6 - 212164:212886)	0	0	(contig_5 - 138662:139948)	(contig_2 - 184277:184774)	(contig_2 - 269185:270663)	(contig_4 - 183092:183478)	(contig_6 - 106286:106951)	(contig_1 - 20270:21070)	(contig_4 - 135222:135644)	(contig_7 - 231388:232020)	(contig_11 - 40258:40632)	(contig_10 - 75702:76115)	(contig_11 - 954:1376)	0	(contig_6 - 158954:159775)	(contig_16 - 6555:8093)	(contig_5 - 194022:195383)	(contig_7 - 179997:180503)	(contig_6 - 183556:184104)	(contig_8 - 133533:134444)
236		H2-20-0293-1	15 (CC15)	died	no MRSA	0	0	0	0	0	0	0	0	0	0	0	0	0	0	0	0	0	0	0	0	0	0	(contig_18 - 33588:34391)	(contig_6 - 36379:37101)	0	0	(contig_4 - 109764:111050)	(contig_2 - 79134:79631)	(contig_11 - 80699:82177)	(contig_9 - 67304:67690)	(contig_6 - 142314:142979)	(contig_1 - 20270:21070)	(contig_9 - 115138:115560)	(contig_3 - 246390:247022)	(contig_14 - 40258:40632)	(contig_12 - 7621:8034)	(contig_14 - 954:1376)	(contig_5 - 129066:130034)	(contig_6 - 89490:90311)	(contig_20 - 16532:18070)	(contig_4 - 54329:55690)	(contig_3 - 195000:195506)	(contig_6 - 65161:65709)	(contig_7 - 90721:91632)
237		H5-18-0104-1	15 (CC15)	survived	no MRSA	0	0	0	0	0	0	0	0	0	0	0	0	0	0	0	0	0	0	0	0	0	0	(contig_14 - 33844:34647)	(contig_4 - 214524:215246)	0	0	(contig_5 - 138602:139888)	(contig_1 - 444446:444943)	0	(contig_6 - 67304:67690)	(contig_4 - 108646:109311)	(contig_2 - 20270:21070)	(contig_6 - 115131:115553)	(contig_3 - 7075:7707)	(contig_12 - 40202:40576)	(contig_10 - 7621:8034)	(contig_12 - 954:1376)	(contig_6 - 144702:145670)	(contig_4 - 161314:162135)	(contig_16 - 6432:7970)	(contig_5 - 193963:195324)	0	(contig_4 - 185916:186464)	(contig_7 - 90719:91630)
238		H4-18-0214-1	15 (CC15)	survived	no MRSA	(contig_1 - 561285:561587)	0	0	0	0	0	0	0	0	0	0	0	0	0	0	0	0	0	0	0	0	(contig_1 - 602987:604192)	(contig_13 - 33845:34648)	(contig_5 - 36322:37044)	0	0	0	(contig_1 - 166454:166951)	(contig_1 - 80574:82052)	(contig_3 - 67259:67645)	(contig_5 - 142257:142922)	(contig_2 - 20269:21069)	(contig_3 - 115093:115515)	(contig_4 - 240472:241104)	(contig_10 - 31232:31606)	(contig_8 - 75699:76112)	(contig_10 - 70488:70910)	0	(contig_5 - 89433:90254)	(contig_15 - 16500:18038)	(contig_6 - 54328:55689)	(contig_4 - 195152:195658)	(contig_5 - 65104:65652)	(contig_7 - 38799:39710)
239		H1-18-0346-1	15 (CC15)	survived	no MRSA	(contig_27 - 30:332)	0	0	0	0	0	0	0	0	0	0	0	0	0	0	0	0	0	0	0	0	0	(contig_16 - 33845:34648)	(contig_7 - 114089:114811)	0	0	(contig_4 - 109632:110918)	(contig_6 - 29165:29662)	(contig_6 - 113756:115234)	(contig_9 - 67303:67689)	(contig_7 - 8215:8880)	(contig_1 - 412367:413167)	(contig_9 - 115136:115558)	(contig_3 - 246477:247109)	(contig_13 - 25743:26117)	(contig_10 - 75702:76115)	(contig_17 - 1017:1439)	(contig_5 - 26206:27174)	(contig_7 - 60879:61700)	(contig_20 - 6618:8156)	(contig_4 - 54327:55688)	(contig_3 - 195147:195653)	(contig_7 - 85481:86029)	(contig_8 - 90721:91632)
240		H4-17-0403-1	15 (CC15)	survived	no MRSA	0	0	0	0	0	0	0	0	0	0	0	0	0	0	0	0	0	0	0	0	0	0	(contig_14 - 4256:5059)	(contig_5 - 216138:216860)	0	0	(contig_6 - 138665:139951)	(contig_1 - 444507:445004)	(contig_1 - 529403:530881)	0	(contig_5 - 110260:110925)	(contig_2 - 20270:21070)	(contig_3 - 159017:159439)	(contig_4 - 66588:67220)	(contig_9 - 62183:62557)	(contig_10 - 75702:76115)	(contig_9 - 101439:101861)	(contig_3 - 128900:129868)	(contig_5 - 162928:163749)	(contig_15 - 6556:8094)	(contig_6 - 194025:195386)	(contig_4 - 118106:118612)	(contig_5 - 187530:188078)	(contig_8 - 38799:39710)
241		H2-18-0270-1	15 (CC15)	survived	no MRSA	0	0	0	0	0	0	0	0	0	0	0	0	0	0	0	0	0	0	0	0	(contig_2 - 67874:67945)	(contig_2 - 53576:54781)	0	(contig_8 - 36290:37012)	0	(contig_1 - 371970:372290)	(contig_5 - 138664:139950)	(contig_3 - 201687:202184)	(contig_15 - 4964:6442)	(contig_6 - 67317:67703)	(contig_9 - 110512:111177)	(contig_1 - 20268:21068)	(contig_6 - 115151:115573)	(contig_4 - 11091:11723)	(contig_11 - 40202:40576)	(contig_12 - 7650:8063)	(contig_11 - 955:1377)	(contig_10 - 13510:14478)	(contig_8 - 89401:90222)	0	(contig_5 - 193629:194990)	(contig_4 - 62607:63113)	(contig_8 - 65072:65620)	(contig_7 - 90662:91573)
242		H5-17-0104-1	9	survived	no MRSA	0	0	0	0	0	0	0	0	0	0	0	0	0	0	0	(contig_2 - 52000:53814)	0	(contig_2 - 201916:202257)	0	0	0	0	0	(contig_5 - 29878:30600)	0	(contig_2 - 213098:213418)	0	(contig_1 - 778859:779356)	0	(contig_4 - 255488:255874)	(contig_5 - 136861:137526)	(contig_3 - 125625:126425)	(contig_4 - 207698:208120)	(contig_2 - 382565:383197)	0	(contig_8 - 75515:75928)	(contig_2 - 127378:127800)	0	(contig_5 - 84295:85116)	(contig_8 - 90008:91546)	0	(contig_2 - 336621:337127)	(contig_5 - 59661:60209)	(contig_10 - 7229:8140)
243		H2-17-0656-1	9	died	no MRSA	0	0	0	0	0	0	0	0	0	0	0	0	0	0	0	(contig_1 - 317186:319000)	0	0	0	0	0	0	0	(contig_2 - 110999:111721)	0	(contig_6 - 2475:2795)	0	(contig_1 - 508007:508504)	0	(contig_2 - 214427:214813)	(contig_2 - 4079:4744)	(contig_3 - 119729:120529)	(contig_2 - 262180:262602)	(contig_1 - 6856:7488)	0	(contig_7 - 75515:75928)	(contig_1 - 243373:243795)	0	(contig_2 - 56491:57312)	(contig_7 - 90005:91543)	0	(contig_1 - 47447:47953)	(contig_2 - 81397:81945)	(contig_5 - 38885:39796)
244		H5-17-0276-1	9	died	no MRSA	0	0	0	0	0	0	0	0	0	0	0	0	0	0	0	(contig_1 - 911356:913170)	0	0	0	0	0	0	0	(contig_8 - 29814:30536)	0	0	0	(contig_1 - 721609:722106)	(contig_1 - 806160:807638)	(contig_2 - 69443:69829)	(contig_4 - 78144:78809)	(contig_4 - 208113:208913)	(contig_2 - 117197:117619)	(contig_1 - 1228612:1229244)	0	(contig_6 - 32281:32694)	(contig_1 - 986678:987100)	0	(contig_4 - 18056:18877)	(contig_6 - 16663:18201)	0	(contig_1 - 1182667:1183173)	(contig_8 - 59590:60138)	(contig_5 - 42016:42927)
245		H5-20-0175-1	109	survived	no MRSA	(contig_2 - 594096:594398)	0	0	0	0	0	0	0	0	0	0	0	0	0	0	0	0	0	0	0	(contig_2 - 566478:566549)	0	0	(contig_2 - 29844:30566)	0	0	0	(contig_1 - 276718:277215)	(contig_1 - 191246:192724)	(contig_3 - 73340:73726)	(contig_2 - 136823:137488)	(contig_2 - 266784:267584)	(contig_3 - 121092:121514)	(contig_4 - 245275:245907)	0	(contig_7 - 32144:32557)	0	0	(contig_2 - 84254:85075)	0	0	(contig_4 - 199331:199837)	(contig_2 - 59621:60169)	0
246		H2-20-0104-1	109	survived	no MRSA	0	0	0	0	0	0	0	0	0	0	0	0	0	0	0	0	0	0	0	0	0	0	0	(contig_9 - 35569:36291)	0	0	0	(contig_2 - 276895:277392)	(contig_2 - 191486:192964)	(contig_3 - 69688:70074)	0	(contig_1 - 200885:201685)	(contig_3 - 117439:117861)	(contig_5 - 6906:7538)	0	(contig_7 - 75556:75969)	0	0	(contig_1 - 18047:18868)	0	0	(contig_5 - 52967:53473)	0	0
247		H4-18-0271-1	464	survived	no MRSA	0	0	0	0	0	0	0	0	0	0	0	0	0	0	0	0	0	0	0	(contig_1 - 179264:180967)	0	0	(contig_8 - 33586:34389)	0	0	0	(contig_1 - 629662:630948)	(contig_1 - 66771:67268)	(contig_3 - 487646:489124)	(contig_2 - 774956:775342)	0	(contig_2 - 432300:433100)	(contig_9 - 7869:8291)	(contig_3 - 10603:11235)	(contig_3 - 347405:347779)	(contig_6 - 75521:75934)	(contig_3 - 264415:264837)	(contig_4 - 20983:21951)	(contig_2 - 617428:618249)	(contig_6 - 91760:93298)	0	(contig_3 - 51911:52417)	(contig_2 - 642398:642946)	(contig_5 - 99821:100732)
248		H1-17-0271-1	97 (CC97)	survived	no MRSA	0	0	0	0	0	0	0	0	0	0	0	0	0	0	(contig_3 - 281010:282200)	(contig_3 - 383708:385522)	0	0	0	(contig_1 - 662053:663756)	0	0	(contig_7 - 4311:5114)	0	0	0	(contig_1 - 218896:220182)	0	(contig_3 - 489178:490656)	(contig_2 - 773253:773639)	(contig_2 - 562695:563360)	(contig_2 - 430977:431777)	(contig_4 - 23282:23704)	(contig_3 - 66528:67160)	(contig_3 - 348938:349312)	(contig_6 - 75521:75934)	(contig_3 - 309499:309921)	(contig_4 - 52547:53515)	(contig_2 - 616006:616827)	(contig_6 - 91827:93365)	(contig_1 - 273805:275166)	(contig_3 - 112594:113100)	(contig_2 - 640919:641467)	(contig_5 - 54667:55578)
249		H2-18-0164-1	97 (CC97)	died	no MRSA	0	0	0	0	0	0	0	0	0	0	0	0	0	0	(contig_3 - 223135:224325)	(contig_3 - 119737:121551)	0	(contig_4 - 120371:120712)	0	(contig_1 - 179201:180904)	0	0	(contig_8 - 33817:34620)	(contig_6 - 125028:125750)	0	(contig_4 - 109210:109530)	(contig_1 - 626059:627345)	0	(contig_3 - 14604:16082)	(contig_6 - 22482:22868)	(contig_2 - 566796:567461)	(contig_2 - 435672:436472)	(contig_4 - 214739:215161)	(contig_3 - 437934:438566)	(contig_3 - 155947:156321)	(contig_7 - 75520:75933)	(contig_3 - 195394:195816)	(contig_4 - 184927:185895)	(contig_2 - 620427:621248)	(contig_7 - 91826:93364)	(contig_1 - 571020:572381)	(contig_3 - 391988:392494)	(contig_6 - 153880:154428)	(contig_5 - 54831:55742)
250		H1-18-0399-1	97 (CC97)	survived	no MRSA	0	0	0	0	0	0	0	0	0	0	0	0	0	0	(contig_3 - 277257:278447)	(contig_7 - 97432:99246)	0	0	0	(contig_2 - 179197:180900)	0	0	(contig_10 - 33817:34620)	(contig_1 - 670669:671391)	(contig_11 - 2564:3181)	0	(contig_2 - 617578:618864)	0	(contig_9 - 14667:16145)	(contig_1 - 773946:774332)	(contig_1 - 563505:564170)	(contig_1 - 431918:432718)	(contig_4 - 201280:201702)	(contig_3 - 62971:63603)	(contig_7 - 62661:63035)	(contig_8 - 33883:34296)	(contig_7 - 23280:23702)	(contig_4 - 171468:172436)	(contig_1 - 617136:617942)	(contig_8 - 16452:17990)	(contig_2 - 562729:564090)	(contig_3 - 109041:109547)	(contig_1 - 641991:642539)	(contig_5 - 131517:132428)
251		H1-18-0415-1	97 (CC97)	survived	no MRSA	0	0	0	0	0	0	0	0	0	0	0	0	0	0	(contig_3 - 3984:5174)	(contig_8 - 43228:45042)	0	0	0	(contig_2 - 70431:72134)	0	0	(contig_21 - 3433:4236)	(contig_11 - 1564:2286)	(contig_24 - 2564:3181)	0	(contig_1 - 33639:34925)	(contig_2 - 183789:184286)	(contig_12 - 14793:16271)	(contig_19 - 24328:24714)	(contig_7 - 54330:54995)	(contig_15 - 36035:36835)	(contig_6 - 23272:23694)	(contig_3 - 218652:219284)	(contig_8 - 79438:79812)	(contig_9 - 33882:34295)	(contig_8 - 118774:119196)	(contig_6 - 52538:53506)	(contig_7 - 558:1364)	(contig_9 - 16452:17990)	(contig_1 - 88471:89832)	(contig_3 - 172708:173214)	(contig_18 - 26387:26935)	(contig_4 - 54232:55143)
252		H4-18-0383-1	97 (CC97)	survived	no MRSA	0	0	0	0	0	0	0	0	0	0	0	0	0	0	(contig_4 - 224806:225996)	(contig_10 - 43228:45042)	0	0	0	(contig_2 - 70443:72146)	0	0	(contig_14 - 3457:4260)	(contig_3 - 125419:126141)	0	0	(contig_6 - 162906:164192)	(contig_2 - 184085:184582)	(contig_12 - 14793:16271)	(contig_3 - 22481:22867)	(contig_3 - 232641:233306)	(contig_1 - 126563:127363)	(contig_5 - 23272:23694)	(contig_4 - 10582:11214)	(contig_10 - 79438:79812)	(contig_11 - 75562:75975)	(contig_10 - 118774:119196)	(contig_5 - 52533:53501)	(contig_3 - 178869:179675)	(contig_11 - 91802:93340)	(contig_6 - 107998:109359)	(contig_4 - 56653:57159)	(contig_3 - 154272:154820)	(contig_8 - 131531:132442)
253		H4-18-0295-1	97 (CC97)	died	no MRSA	0	0	0	0	0	0	0	0	0	0	0	0	0	(contig_18 - 14162:14527)	(contig_4 - 195239:196429)	(contig_9 - 43228:45042)	0	0	0	(contig_10 - 70443:72146)	0	0	(contig_16 - 33844:34647)	(contig_1 - 474898:475620)	0	0	(contig_7 - 51590:52876)	(contig_8 - 66703:67200)	(contig_13 - 60440:61918)	(contig_1 - 578175:578561)	(contig_1 - 367733:368398)	(contig_1 - 236348:237148)	(contig_3 - 201280:201702)	(contig_17 - 25538:26170)	(contig_9 - 79438:79812)	(contig_11 - 33817:34230)	(contig_9 - 118774:119196)	(contig_3 - 171468:172436)	(contig_1 - 421364:422170)	(contig_11 - 16452:17990)	(contig_7 - 106422:107783)	(contig_4 - 27087:27593)	(contig_1 - 446219:446767)	(contig_14 - 40315:41226)
254		H2-20-0431-1	97 (CC97)	survived	no MRSA	0	0	0	0	0	0	0	0	0	0	0	0	0	0	(contig_4 - 221139:222329)	(contig_8 - 43227:45041)	0	0	0	(contig_3 - 179140:180843)	0	0	(contig_12 - 33594:34397)	(contig_1 - 663433:664155)	0	0	(contig_2 - 366161:367447)	(contig_3 - 66703:67200)	(contig_10 - 14793:16271)	(contig_1 - 766752:767138)	0	(contig_1 - 425451:426251)	(contig_5 - 201280:201702)	(contig_4 - 6923:7555)	(contig_8 - 79437:79811)	(contig_9 - 75521:75934)	(contig_8 - 118773:119195)	(contig_5 - 171468:172436)	(contig_1 - 609900:610706)	(contig_9 - 91827:93365)	(contig_2 - 311315:312676)	(contig_4 - 52994:53500)	(contig_1 - 634754:635302)	(contig_6 - 54247:55158)
255		H2-17-0515-1	97 (CC97)	survived	no MRSA	0	0	0	0	0	0	0	0	0	0	0	0	0	0	(contig_5 - 3984:5174)	(contig_9 - 97462:99276)	0	0	0	(contig_4 - 70443:72146)	0	0	(contig_14 - 33544:34347)	(contig_3 - 197410:198132)	0	0	(contig_2 - 366022:367308)	(contig_4 - 184053:184550)	(contig_11 - 14667:16145)	(contig_3 - 300686:301072)	(contig_3 - 90246:90911)	(contig_1 - 386635:387435)	(contig_6 - 201289:201711)	(contig_5 - 218771:219403)	(contig_9 - 62692:63066)	(contig_10 - 33883:34296)	(contig_9 - 23307:23729)	(contig_6 - 171477:172445)	(contig_3 - 143877:144683)	(contig_10 - 16452:17990)	(contig_2 - 311173:312534)	(contig_5 - 172826:173332)	(contig_3 - 168731:169279)	(contig_7 - 131204:132115)
256		H2-17-0469-1	97 (CC97)	survived	no MRSA	0	0	0	0	0	0	0	0	0	0	0	0	0	0	0	(contig_8 - 97462:99276)	0	0	0	(contig_3 - 70443:72146)	0	0	(contig_12 - 3456:4259)	(contig_1 - 671210:671932)	(contig_13 - 2564:3181)	0	(contig_2 - 366079:367365)	(contig_3 - 184052:184549)	(contig_10 - 14793:16271)	(contig_1 - 774485:774871)	(contig_1 - 563977:564642)	(contig_1 - 431942:432742)	(contig_5 - 23272:23694)	(contig_4 - 6876:7508)	(contig_8 - 62692:63066)	(contig_9 - 75503:75916)	(contig_8 - 23308:23730)	(contig_5 - 52538:53506)	(contig_1 - 617607:618413)	(contig_9 - 91809:93347)	(contig_2 - 311230:312591)	(contig_4 - 52947:53453)	(contig_1 - 642531:643079)	(contig_6 - 54241:55152)
257		H4-17-0077-1	97 (CC97)	survived	no MRSA	0	0	0	0	0	0	0	0	0	0	0	0	0	0	(contig_4 - 224800:225990)	0	0	0	0	(contig_3 - 179139:180842)	0	0	(contig_12 - 33845:34648)	(contig_1 - 667362:668084)	0	0	(contig_2 - 366140:367426)	(contig_3 - 66703:67200)	(contig_10 - 60440:61918)	(contig_1 - 770636:771022)	(contig_1 - 560200:560865)	(contig_1 - 427965:428765)	(contig_5 - 201275:201697)	(contig_4 - 10636:11268)	(contig_8 - 62691:63065)	(contig_9 - 75521:75934)	(contig_8 - 23308:23730)	(contig_5 - 171463:172431)	(contig_1 - 613828:614634)	(contig_9 - 91827:93365)	(contig_2 - 311233:312594)	(contig_4 - 56707:57213)	(contig_1 - 638683:639231)	(contig_6 - 131518:132429)
258		H2-18-0183-1	97 (CC97)	died	no MRSA	0	0	0	0	0	0	0	0	0	0	0	0	0	0	(contig_3 - 3984:5174)	0	0	0	0	(contig_2 - 490294:491997)	0	0	(contig_11 - 33815:34618)	(contig_1 - 667671:668393)	(contig_12 - 2564:3181)	0	(contig_2 - 51590:52876)	(contig_2 - 603935:604432)	(contig_9 - 14730:16208)	(contig_1 - 770947:771333)	(contig_1 - 560506:561171)	(contig_1 - 428663:429463)	(contig_4 - 201270:201692)	(contig_3 - 218767:219399)	(contig_7 - 62693:63067)	(contig_8 - 75520:75933)	(contig_7 - 23309:23731)	(contig_4 - 171459:172427)	(contig_1 - 614137:614943)	(contig_8 - 91835:93373)	(contig_2 - 106422:107783)	(contig_3 - 172822:173328)	(contig_1 - 638992:639540)	(contig_5 - 131540:132451)
259		H2-18-0331-1	97 (CC97)	survived	no MRSA	0	0	0	0	0	0	0	0	0	0	0	0	0	0	(contig_5 - 221071:222261)	(contig_8 - 97461:99275)	0	0	0	(contig_4 - 70442:72145)	0	0	(contig_14 - 33844:34647)	(contig_1 - 328171:328893)	(contig_17 - 2564:3181)	0	0	(contig_4 - 184029:184526)	(contig_11 - 14730:16208)	(contig_1 - 431446:431832)	(contig_1 - 221006:221671)	(contig_1 - 89351:90151)	(contig_6 - 23272:23694)	(contig_5 - 6848:7480)	(contig_8 - 62691:63065)	(contig_10 - 75524:75937)	(contig_8 - 23308:23730)	(contig_6 - 52538:53506)	(contig_1 - 274637:275443)	(contig_10 - 91838:93376)	0	(contig_5 - 52919:53425)	(contig_1 - 299492:300040)	(contig_7 - 131459:132370)
260		H2-17-0221-1	97 (CC97)	died	no MRSA	0	0	0	0	0	0	0	0	0	0	0	0	0	0	(contig_5 - 221128:222318)	(contig_9 - 97444:99258)	0	0	0	(contig_3 - 179081:180784)	0	0	(contig_13 - 3456:4259)	(contig_4 - 126458:127180)	0	0	(contig_2 - 51590:52876)	(contig_3 - 66703:67200)	(contig_11 - 60440:61918)	(contig_4 - 22481:22867)	(contig_4 - 233660:234325)	(contig_1 - 431706:432506)	(contig_6 - 201278:201700)	(contig_5 - 6906:7538)	(contig_9 - 62674:63048)	(contig_10 - 33883:34296)	(contig_9 - 23290:23712)	(contig_6 - 171466:172434)	(contig_4 - 179888:180694)	(contig_10 - 16452:17990)	0	(contig_5 - 52976:53482)	(contig_4 - 155291:155839)	(contig_7 - 131518:132429)
261		H2-18-0454-1	88	died	no MRSA	0	0	0	0	0	0	0	0	0	0	0	0	0	(contig_1 - 940253:940618)	0	0	0	0	0	(contig_1 - 559322:561025)	0	0	0	(contig_5 - 35934:36656)	0	0	(contig_1 - 121172:122458)	(contig_1 - 675529:676026)	0	0	(contig_5 - 142747:143412)	(contig_2 - 417942:418742)	(contig_4 - 118003:118425)	(contig_3 - 276253:276885)	(contig_1 - 898333:898707)	(contig_7 - 75340:75753)	(contig_3 - 22906:23328)	(contig_4 - 148510:149478)	(contig_5 - 89268:90089)	(contig_7 - 89821:91359)	0	0	(contig_5 - 64738:65286)	0
262		H5-20-0404-1	779	survived	no MRSA	0	0	0	0	0	0	0	0	0	0	0	0	0	0	0	0	0	0	0	0	0	0	0	0	0	0	0	(contig_1 - 320366:320863)	(contig_1 - 234671:236149)	(contig_11 - 68014:68400)	(contig_4 - 144566:145231)	(contig_2 - 121743:122543)	0	0	0	0	0	0	0	0	0	(contig_5 - 51023:51529)	(contig_4 - 65089:65637)	0
263		H2-20-0281-1	779	survived	no MRSA	0	0	0	0	0	0	0	0	0	0	0	0	0	0	0	0	0	0	0	0	0	0	0	0	0	0	0	(contig_1 - 667205:667702)	(contig_1 - 751919:753397)	(contig_3 - 14169:14555)	(contig_3 - 228353:229018)	(contig_2 - 121989:122789)	0	0	0	0	0	0	0	0	0	(contig_8 - 79213:79719)	(contig_3 - 148876:149424)	0
264		H2-18-0511-1	-	survived	MRSA	0	0	0	0	0	0	0	0	0	0	0	0	0	0	0	(contig_3 - 92341:94155)	0	0	0	0	(contig_6 - 1714:1785)	0	0	0	(contig_27 - 1246:1863)	0	0	0	(contig_3 - 197864:199342)	(contig_11 - 44954:45340)	(contig_9 - 4039:4704)	0	(contig_11 - 92790:93212)	(contig_13 - 10765:11397)	0	(contig_12 - 74713:75126)	(contig_3 - 18707:19129)	(contig_5 - 171912:172880)	(contig_9 - 58975:59796)	0	(contig_1 - 246012:247373)	0	(contig_9 - 83464:84012)	0
265		H4-17-0081-1	5 (CC5)	survived	no MRSA	0	0	0	0	0	0	0	0	0	0	0	0	0	0	0	0	0	0	0	(contig_1 - 111434:113137)	0	0	0	0	0	0	(contig_1 - 551922:553208)	(contig_10 - 2762:3259)	(contig_8 - 11173:12651)	(contig_3 - 69558:69944)	(contig_2 - 564056:564721)	(contig_2 - 433235:434035)	(contig_3 - 117574:117996)	(contig_4 - 146935:147567)	(contig_9 - 60644:61018)	(contig_7 - 32082:32495)	(contig_6 - 90258:90680)	(contig_3 - 146930:147898)	(contig_2 - 617797:618618)	(contig_7 - 16476:18014)	0	(contig_4 - 106259:106765)	0	0
266		H2-18-0567-1	5 (CC5)	survived	no MRSA	0	0	0	0	0	0	0	0	0	0	0	0	0	0	0	0	0	0	0	(contig_1 - 550794:552497)	0	0	0	0	0	0	(contig_1 - 120943:122229)	(contig_1 - 666630:667127)	(contig_1 - 751251:752729)	(contig_2 - 219079:219465)	(contig_2 - 4197:4862)	(contig_3 - 257187:257987)	(contig_2 - 267095:267517)	0	(contig_12 - 15235:15609)	(contig_7 - 32082:32495)	(contig_4 - 39811:40233)	(contig_2 - 296451:297419)	(contig_2 - 57938:58759)	(contig_7 - 16476:18014)	0	(contig_8 - 47695:48201)	(contig_2 - 83069:83617)	0
267		H5-20-0310-1	5 (CC5)	died	no MRSA	0	(contig_17 - 23853:24530)	0	0	(contig_17 - 13142:13753)	(contig_17 - 16167:16946)	(contig_17 - 25241:25420)	(contig_17 - 1985:2173)	(contig_17 - 26053:26823)	(contig_17 - 25548:25949)	(contig_17 - 17999:18166)	(contig_17 - 17036:17842)	(contig_17 - 14106:14525)	0	0	0	0	(contig_5 - 75011:75352)	(contig_17 - 3725:3865)	(contig_1 - 111436:113139)	0	0	0	0	(contig_17 - 2560:3177)	(contig_5 - 63850:64170)	(contig_1 - 551552:552838)	(contig_4 - 2762:3259)	(contig_4 - 87451:88929)	(contig_3 - 259068:259454)	(contig_6 - 143185:143850)	(contig_2 - 250730:251530)	(contig_3 - 211016:211438)	(contig_10 - 54643:55275)	(contig_4 - 228302:228676)	(contig_9 - 55622:56035)	(contig_5 - 27582:28004)	(contig_3 - 177951:178919)	(contig_6 - 89287:90108)	0	(contig_1 - 496543:497904)	(contig_10 - 13967:14473)	(contig_6 - 64557:65105)	0
268		H4-17-0282-1	-	survived	no MRSA	0	0	0	0	0	0	0	0	0	0	0	0	0	0	0	0	0	(contig_16 - 11652:11993)	0	(contig_2 - 47547:49250)	0	0	0	0	0	(contig_16 - 491:811)	(contig_4 - 66558:67844)	(contig_6 - 184190:184687)	(contig_6 - 98522:100000)	(contig_3 - 255774:256160)	(contig_1 - 489145:489810)	(contig_1 - 358498:359298)	(contig_3 - 207722:208144)	(contig_8 - 54643:55275)	(contig_12 - 40852:41226)	(contig_9 - 55525:55938)	(contig_5 - 67230:67652)	(contig_3 - 177943:178911)	(contig_1 - 542886:543707)	(contig_9 - 70006:71544)	(contig_4 - 11537:12898)	(contig_8 - 13967:14473)	(contig_1 - 567865:568413)	0
269		H5-18-0333-1	950	died	no MRSA	0	0	0	0	0	0	0	0	0	0	0	0	0	(contig_4 - 26949:27314)	0	0	0	0	0	(contig_6 - 141668:143371)	0	0	0	0	(contig_19 - 5502:6119)	0	(contig_2 - 296797:298083)	(contig_5 - 2706:3203)	(contig_5 - 87395:88873)	(contig_3 - 57962:58348)	(contig_8 - 143382:144047)	(contig_1 - 366028:366828)	(contig_3 - 105922:106344)	(contig_10 - 6878:7510)	(contig_5 - 228240:228614)	(contig_9 - 55623:56036)	(contig_4 - 67320:67742)	(contig_3 - 135278:136246)	(contig_8 - 89485:90306)	(contig_9 - 70104:71642)	(contig_2 - 241775:243136)	(contig_10 - 47680:48186)	(contig_8 - 64627:65175)	0
270		H2-18-0403-1	5 (CC5)	survived	no MRSA	0	(contig_17 - 19577:20254)	0	0	(contig_17 - 8866:9477)	(contig_17 - 11891:12670)	(contig_17 - 20965:21144)	(contig_17 - 1985:2173)	(contig_17 - 21777:22547)	(contig_17 - 21272:21673)	(contig_17 - 13723:13890)	(contig_17 - 12760:13566)	(contig_17 - 9830:10249)	0	0	0	0	(contig_3 - 68142:68483)	(contig_17 - 3725:3865)	0	0	0	0	0	(contig_17 - 2560:3177)	(contig_3 - 79324:79644)	(contig_2 - 293261:294547)	(contig_9 - 69141:69638)	(contig_7 - 14933:16411)	(contig_1 - 303292:303678)	(contig_1 - 92191:92856)	(contig_3 - 38025:38825)	(contig_1 - 351318:351740)	(contig_10 - 54641:55273)	(contig_7 - 155782:156156)	(contig_8 - 55624:56037)	(contig_4 - 182217:182639)	(contig_1 - 380613:381581)	(contig_1 - 146011:146640)	(contig_8 - 70105:71643)	(contig_2 - 238227:239588)	(contig_10 - 13966:14472)	(contig_1 - 170949:171497)	0
271		H2-20-0611-1	-	survived	no MRSA	0	0	0	0	0	0	0	0	0	0	0	0	0	0	0	0	0	0	0	(contig_6 - 111435:113138)	0	0	0	0	0	0	(contig_2 - 214426:215712)	(contig_4 - 2762:3259)	(contig_4 - 87451:88929)	(contig_3 - 68429:68815)	(contig_14 - 7846:8511)	(contig_1 - 419902:420702)	(contig_3 - 116445:116867)	(contig_11 - 6814:7446)	(contig_4 - 228300:228674)	(contig_10 - 55625:56038)	(contig_5 - 4214:4636)	(contig_3 - 145805:146773)	(contig_9 - 11497:12318)	(contig_10 - 70106:71644)	(contig_2 - 269373:270734)	(contig_11 - 47616:48122)	0	0
272		H4-17-0443-1	5 (CC5)	survived	no MRSA	0	0	0	0	0	0	0	0	0	0	0	0	0	0	0	0	0	0	0	(contig_1 - 445816:447519)	0	0	0	0	0	0	(contig_1 - 5817:7103)	(contig_7 - 138733:139230)	(contig_7 - 53063:54541)	(contig_3 - 255045:255431)	(contig_2 - 387804:388469)	(contig_2 - 257195:257995)	(contig_3 - 207784:208206)	(contig_14 - 54700:55332)	(contig_9 - 15233:15607)	(contig_11 - 32240:32653)	(contig_12 - 54469:54891)	(contig_3 - 177878:178846)	(contig_2 - 441545:442366)	(contig_11 - 16634:18172)	(contig_1 - 60703:62064)	(contig_14 - 14024:14530)	(contig_13 - 64514:65062)	0
273		H2-18-0385-1	5 (CC5)	survived	no MRSA	0	0	0	0	0	0	0	0	0	0	0	0	0	0	0	0	0	0	0	(contig_1 - 445778:447481)	0	0	0	0	0	0	(contig_1 - 5828:7114)	(contig_8 - 138743:139240)	(contig_8 - 53073:54551)	(contig_3 - 68654:69040)	(contig_9 - 63513:64178)	(contig_2 - 257007:257807)	(contig_3 - 116669:117091)	(contig_13 - 54699:55331)	(contig_10 - 86148:86522)	(contig_11 - 55622:56035)	(contig_5 - 198362:198784)	(contig_3 - 146025:146993)	(contig_9 - 117254:118075)	(contig_11 - 70105:71643)	(contig_1 - 60656:62017)	(contig_13 - 14023:14529)	(contig_12 - 3265:3813)	0
274		H2-18-0255-1	5 (CC5)	survived	MRSA	(contig_7 - 64165:64467)	(contig_16 - 23857:24534)	(contig_3 - 278236:278328)	0	(contig_16 - 13145:13756)	(contig_16 - 16170:16949)	(contig_16 - 25245:25424)	(contig_16 - 1985:2173)	(contig_16 - 26057:26827)	(contig_16 - 25552:25953)	(contig_16 - 18002:18169)	(contig_16 - 17039:17845)	(contig_16 - 14109:14528)	0	0	0	0	0	(contig_16 - 3725:3865)	(contig_1 - 118563:120266)	0	0	0	0	(contig_16 - 2560:3177)	0	(contig_5 - 7877:9163)	(contig_4 - 2706:3203)	(contig_4 - 87395:88873)	(contig_2 - 255935:256321)	(contig_2 - 468737:469402)	(contig_8 - 125970:126770)	(contig_2 - 207838:208260)	(contig_11 - 54640:55272)	(contig_4 - 228253:228627)	(contig_10 - 55624:56037)	(contig_6 - 23963:24385)	(contig_2 - 177938:178906)	(contig_2 - 414840:415661)	0	(contig_1 - 504138:505499)	(contig_11 - 14022:14528)	(contig_2 - 390109:390657)	0
275		H2-18-0661-1	225	survived	MRSA	0	(contig_15 - 23835:24512)	(contig_3 - 442126:442218)	0	(contig_15 - 13125:13736)	(contig_15 - 16150:16929)	(contig_15 - 25223:25402)	(contig_15 - 1985:2173)	(contig_15 - 26035:26805)	(contig_15 - 25530:25931)	(contig_15 - 17982:18149)	(contig_15 - 17019:17825)	(contig_15 - 14089:14508)	0	0	0	0	(contig_6 - 43315:43656)	(contig_15 - 3725:3865)	(contig_1 - 430873:432576)	0	0	0	0	(contig_15 - 2560:3177)	(contig_6 - 32154:32474)	(contig_5 - 7877:9163)	(contig_4 - 2706:3203)	(contig_4 - 87394:88872)	(contig_2 - 255934:256320)	(contig_2 - 468992:469657)	(contig_6 - 139269:140069)	(contig_2 - 207838:208260)	(contig_7 - 54700:55332)	(contig_4 - 228226:228600)	(contig_11 - 55524:55937)	(contig_10 - 67665:68087)	0	(contig_2 - 415095:415916)	(contig_11 - 70005:71543)	(contig_1 - 45760:47121)	(contig_7 - 14024:14530)	(contig_2 - 390366:390914)	0
276		H5-20-0299-1	225	survived	MRSA	0	(contig_19 - 23854:24531)	(contig_10 - 125516:125608)	0	(contig_19 - 13143:13754)	(contig_19 - 16168:16947)	(contig_19 - 25242:25421)	(contig_19 - 1985:2173)	(contig_19 - 26054:26824)	(contig_19 - 25549:25950)	(contig_19 - 18000:18167)	(contig_19 - 17037:17843)	(contig_19 - 14107:14526)	(contig_9 - 108673:109038)	0	0	0	0	(contig_19 - 3725:3865)	(contig_1 - 475266:476969)	(contig_1 - 170855:170926)	(contig_1 - 156826:158031)	0	0	(contig_19 - 2560:3177)	0	(contig_3 - 212850:214136)	(contig_2 - 2705:3202)	(contig_2 - 87260:88738)	(contig_5 - 163884:164270)	(contig_4 - 59401:60066)	(contig_8 - 17448:18248)	(contig_5 - 115787:116209)	(contig_15 - 54643:55275)	(contig_2 - 228093:228467)	(contig_14 - 31667:32080)	(contig_9 - 67513:67935)	(contig_5 - 85885:86853)	(contig_4 - 113142:113963)	(contig_14 - 16061:17599)	(contig_1 - 45777:47138)	(contig_15 - 13967:14473)	(contig_4 - 138145:138693)	0
277		H2-20-0337-1	225	died	MRSA	0	(contig_17 - 23855:24532)	(contig_3 - 278224:278316)	0	(contig_17 - 13144:13755)	(contig_17 - 16169:16948)	(contig_17 - 25243:25422)	(contig_17 - 1985:2173)	(contig_17 - 26055:26825)	(contig_17 - 25550:25951)	(contig_17 - 18001:18168)	(contig_17 - 17038:17844)	(contig_17 - 14108:14527)	(contig_11 - 108712:109077)	0	0	0	0	(contig_17 - 3725:3865)	(contig_1 - 111436:113139)	0	0	0	0	(contig_17 - 2560:3177)	0	(contig_5 - 212713:213999)	(contig_4 - 240501:240998)	(contig_4 - 154965:156443)	(contig_2 - 255981:256367)	(contig_10 - 4107:4772)	(contig_9 - 125773:126573)	(contig_2 - 207839:208261)	(contig_14 - 54700:55332)	(contig_4 - 15238:15612)	(contig_13 - 31666:32079)	(contig_11 - 67608:68030)	(contig_2 - 177937:178905)	(contig_10 - 57848:58669)	(contig_13 - 16060:17598)	(contig_7 - 45777:47138)	(contig_14 - 14024:14530)	(contig_10 - 82851:83399)	0
278		H4-17-0341-1	225	died	MRSA	0	(contig_17 - 23853:24530)	(contig_3 - 278297:278389)	0	(contig_17 - 13144:13755)	(contig_17 - 16169:16948)	(contig_17 - 25241:25420)	(contig_17 - 1985:2173)	(contig_17 - 26053:26823)	(contig_17 - 25548:25949)	(contig_17 - 18001:18168)	(contig_17 - 17038:17844)	(contig_17 - 14108:14527)	(contig_9 - 109899:110264)	0	0	0	0	(contig_17 - 3725:3865)	(contig_1 - 430752:432455)	0	0	0	0	(contig_17 - 2560:3177)	0	(contig_5 - 212852:214138)	(contig_4 - 37423:37920)	(contig_4 - 122048:123526)	(contig_2 - 68434:68820)	(contig_7 - 4111:4776)	(contig_8 - 125911:126711)	(contig_2 - 116449:116871)	(contig_14 - 6886:7518)	(contig_4 - 262882:263256)	(contig_11 - 55623:56036)	(contig_9 - 67666:68088)	(contig_2 - 145805:146773)	(contig_7 - 57852:58673)	(contig_11 - 70104:71642)	(contig_1 - 45778:47139)	(contig_14 - 47688:48194)	(contig_7 - 82855:83403)	0
279		H4-17-0314-1	225	survived	MRSA	0	(contig_15 - 23853:24530)	(contig_4 - 278297:278389)	0	(contig_15 - 13143:13754)	(contig_15 - 16168:16947)	(contig_15 - 25241:25420)	(contig_15 - 1985:2173)	(contig_15 - 26053:26823)	(contig_15 - 25548:25949)	(contig_15 - 18000:18167)	(contig_15 - 17037:17843)	(contig_15 - 14107:14526)	0	0	0	0	0	(contig_15 - 3725:3865)	(contig_1 - 111437:113140)	0	0	0	0	(contig_15 - 2560:3177)	0	(contig_6 - 212852:214138)	(contig_5 - 2705:3202)	(contig_5 - 87394:88872)	(contig_2 - 68431:68817)	(contig_3 - 148185:148850)	(contig_3 - 17466:18266)	(contig_2 - 116492:116914)	(contig_11 - 54643:55275)	(contig_5 - 228227:228601)	(contig_13 - 55623:56036)	(contig_12 - 23918:24340)	(contig_2 - 145848:146816)	(contig_3 - 201926:202747)	(contig_13 - 70104:71642)	0	(contig_11 - 13967:14473)	(contig_3 - 226908:227456)	0
280		H4-18-0150-1	225	survived	MRSA	0	(contig_16 - 23854:24531)	(contig_2 - 441103:441195)	0	(contig_16 - 13144:13755)	0	(contig_16 - 25242:25421)	(contig_16 - 1985:2173)	(contig_16 - 26054:26824)	(contig_16 - 25549:25950)	(contig_16 - 18001:18168)	(contig_16 - 17038:17844)	(contig_16 - 14108:14527)	(contig_9 - 26904:27269)	0	0	0	0	(contig_16 - 3725:3865)	0	0	0	0	0	(contig_16 - 2560:3177)	0	(contig_5 - 212841:214127)	(contig_4 - 240637:241134)	(contig_4 - 154967:156445)	(contig_3 - 68434:68820)	(contig_7 - 4057:4722)	(contig_8 - 17466:18266)	(contig_3 - 116499:116921)	0	(contig_4 - 15239:15613)	(contig_11 - 31667:32080)	(contig_9 - 68007:68429)	(contig_3 - 145794:146762)	(contig_7 - 57798:58619)	(contig_11 - 16061:17599)	(contig_1 - 45777:47138)	(contig_12 - 13967:14473)	(contig_7 - 82801:83349)	0
281		H4-18-0450-1	225	survived	no MRSA	0	(contig_15 - 19576:20253)	0	0	(contig_15 - 8866:9477)	(contig_15 - 11891:12670)	(contig_15 - 20964:21143)	(contig_15 - 1985:2173)	(contig_15 - 21776:22546)	(contig_15 - 21271:21672)	(contig_15 - 13723:13890)	(contig_15 - 12760:13566)	(contig_15 - 9830:10249)	(contig_8 - 108826:109191)	0	0	0	0	(contig_15 - 3725:3865)	(contig_1 - 111436:113139)	0	0	0	0	(contig_15 - 2560:3177)	0	(contig_1 - 558733:560019)	(contig_4 - 2649:3146)	(contig_4 - 87275:88753)	(contig_3 - 49547:49933)	(contig_6 - 143044:143709)	(contig_2 - 125718:126518)	(contig_3 - 97608:98030)	(contig_11 - 54584:55216)	(contig_4 - 228108:228482)	(contig_10 - 55623:56036)	(contig_8 - 67666:68088)	(contig_3 - 126964:127932)	(contig_6 - 89147:89968)	(contig_10 - 70104:71642)	(contig_1 - 496999:498360)	(contig_11 - 13967:14473)	(contig_6 - 64417:64965)	0
282		H4-18-0256-1	225	died	MRSA	0	(contig_18 - 23854:24531)	(contig_3 - 1155:1247)	0	(contig_18 - 13144:13755)	(contig_18 - 16169:16948)	(contig_18 - 25242:25421)	(contig_18 - 1985:2173)	(contig_18 - 26054:26824)	(contig_18 - 25549:25950)	(contig_18 - 18001:18168)	(contig_18 - 17038:17844)	(contig_18 - 14108:14527)	(contig_10 - 26905:27270)	0	0	0	0	(contig_18 - 3725:3865)	(contig_1 - 76333:78036)	0	0	0	0	(contig_18 - 2560:3177)	0	(contig_4 - 7877:9163)	(contig_13 - 73064:73561)	(contig_6 - 154969:156447)	(contig_2 - 255873:256259)	(contig_8 - 143128:143793)	(contig_9 - 17466:18266)	(contig_2 - 207776:208198)	(contig_14 - 6801:7433)	(contig_6 - 15239:15613)	(contig_12 - 55624:56037)	(contig_10 - 68008:68430)	(contig_2 - 177874:178842)	(contig_8 - 89231:90052)	(contig_12 - 70105:71643)	(contig_1 - 461905:463266)	(contig_14 - 47603:48109)	(contig_8 - 64501:65049)	0
283		H2-20-0564-1	-	survived	no MRSA	0	0	0	0	0	0	0	0	0	0	0	0	0	0	0	0	0	0	0	(contig_1 - 328321:330024)	0	0	0	0	0	0	(contig_3 - 106778:108064)	(contig_7 - 163367:163864)	(contig_7 - 77698:79176)	(contig_4 - 142964:143350)	(contig_9 - 7938:8603)	(contig_2 - 126019:126819)	(contig_4 - 94912:95334)	(contig_10 - 63219:63851)	(contig_8 - 61683:62057)	0	(contig_8 - 101190:101612)	(contig_4 - 65010:65978)	(contig_9 - 61678:62499)	(contig_13 - 70104:71642)	(contig_3 - 51871:53232)	(contig_10 - 104010:104516)	(contig_9 - 86809:87357)	0
284		H5-20-0011-1	5 (CC5)	survived	no MRSA	0	0	0	0	0	0	0	0	0	0	0	0	0	0	0	0	0	0	0	(contig_1 - 111499:113202)	0	0	0	0	0	0	(contig_4 - 46817:48103)	(contig_5 - 2593:3090)	(contig_5 - 87282:88760)	(contig_3 - 68434:68820)	(contig_11 - 59218:59883)	(contig_2 - 125845:126645)	(contig_3 - 116259:116681)	(contig_12 - 54643:55275)	(contig_5 - 228133:228507)	(contig_9 - 55624:56037)	(contig_6 - 12465:12887)	(contig_3 - 145615:146583)	(contig_11 - 5321:6142)	(contig_9 - 70105:71643)	(contig_1 - 496828:498189)	(contig_12 - 13967:14473)	(contig_10 - 64402:64950)	0
285		H4-18-0161-1	5 (CC5)	survived	no MRSA	0	(contig_11 - 23851:24528)	0	0	(contig_11 - 13140:13751)	(contig_11 - 16165:16944)	(contig_11 - 25239:25418)	(contig_11 - 1985:2173)	(contig_11 - 26051:26821)	(contig_11 - 25546:25947)	(contig_11 - 17997:18164)	(contig_11 - 17034:17840)	(contig_11 - 14104:14523)	0	0	0	0	0	(contig_11 - 3725:3865)	(contig_1 - 655982:657685)	0	0	0	0	(contig_11 - 2560:3177)	0	(contig_1 - 212856:214142)	(contig_3 - 2649:3146)	(contig_3 - 87338:88816)	(contig_2 - 255918:256304)	(contig_2 - 468409:469074)	(contig_4 - 219864:220664)	(contig_2 - 207888:208310)	(contig_8 - 6823:7455)	(contig_3 - 227998:228372)	(contig_7 - 32082:32495)	(contig_3 - 267561:267983)	(contig_2 - 177986:178954)	(contig_2 - 414512:415333)	(contig_7 - 16476:18014)	(contig_1 - 267745:269106)	(contig_8 - 47625:48131)	(contig_2 - 389654:390202)	0
286		H5-18-0266-1	5 (CC5)	survived	no MRSA	0	0	0	0	0	0	0	0	0	0	0	0	0	0	0	0	0	0	0	(contig_9 - 76493:78196)	0	0	0	0	0	0	(contig_2 - 139225:140511)	(contig_5 - 146026:146523)	0	(contig_3 - 231702:232088)	(contig_1 - 143270:143935)	(contig_1 - 273998:274798)	(contig_3 - 183650:184072)	(contig_13 - 54643:55275)	(contig_10 - 78962:79336)	(contig_11 - 32240:32653)	(contig_4 - 198544:198966)	0	(contig_1 - 89373:90194)	(contig_11 - 16634:18172)	(contig_2 - 194052:195413)	(contig_13 - 13967:14473)	(contig_1 - 64516:65064)	0
287		H3-17-0353-1	5 (CC5)	survived	no MRSA	0	0	0	0	0	0	0	0	0	0	0	0	0	0	0	0	0	0	0	(contig_1 - 651769:653472)	0	0	0	0	0	0	(contig_1 - 212849:214135)	(contig_8 - 95898:96395)	(contig_8 - 10490:11968)	(contig_4 - 255897:256283)	(contig_2 - 388203:388868)	(contig_2 - 257195:257995)	(contig_4 - 207845:208267)	(contig_7 - 54643:55275)	(contig_3 - 128540:128914)	(contig_9 - 55624:56037)	(contig_3 - 168103:168525)	(contig_4 - 177943:178911)	(contig_2 - 441943:442764)	(contig_9 - 70105:71643)	(contig_1 - 267618:268979)	(contig_7 - 13967:14473)	(contig_2 - 467074:467622)	0
288		H5-17-0282-1	5 (CC5)	died	no MRSA	0	(contig_16 - 19568:20245)	0	0	(contig_16 - 8857:9468)	(contig_16 - 11882:12661)	(contig_16 - 20956:21135)	(contig_16 - 1985:2173)	(contig_16 - 21768:22538)	(contig_16 - 21263:21664)	(contig_16 - 13714:13881)	(contig_16 - 12751:13557)	(contig_16 - 9821:10240)	0	0	0	0	(contig_4 - 47178:47519)	(contig_16 - 3725:3865)	(contig_1 - 651415:653118)	0	0	0	0	(contig_16 - 2560:3177)	(contig_4 - 36017:36337)	(contig_1 - 212738:214024)	(contig_3 - 2706:3203)	(contig_3 - 87395:88873)	(contig_7 - 90321:90707)	(contig_9 - 143143:143808)	(contig_2 - 69546:70346)	(contig_7 - 42270:42692)	(contig_2 - 203127:203759)	(contig_3 - 227949:228323)	(contig_15 - 1882:2295)	(contig_4 - 23963:24385)	(contig_7 - 12429:13397)	(contig_9 - 89246:90067)	(contig_15 - 16363:17901)	(contig_1 - 267566:268927)	(contig_2 - 243929:244435)	(contig_9 - 64515:65063)	0
289		H4-18-0306-1	-	survived	no MRSA	0	0	0	0	0	0	0	0	0	0	0	0	0	0	0	0	0	0	0	0	0	0	0	0	0	0	0	(contig_4 - 211103:211600)	(contig_4 - 125433:126911)	(contig_1 - 90131:90517)	(contig_1 - 303699:304364)	(contig_1 - 434208:435008)	(contig_1 - 42270:42692)	(contig_11 - 6810:7442)	(contig_17 - 13650:14024)	(contig_9 - 32239:32652)	(contig_14 - 23902:24324)	0	(contig_1 - 249802:250623)	(contig_9 - 16633:18171)	(contig_2 - 106791:108152)	(contig_11 - 47613:48119)	(contig_1 - 225071:225619)	0
290		H2-17-0471-1	5 (CC5)	died	no MRSA	0	(contig_14 - 23870:24547)	0	0	(contig_14 - 13144:13755)	(contig_14 - 16169:16948)	(contig_14 - 25258:25437)	(contig_14 - 1985:2173)	(contig_14 - 26070:26840)	(contig_14 - 25565:25966)	(contig_14 - 18001:18168)	(contig_14 - 17038:17844)	(contig_14 - 14108:14527)	0	0	0	0	0	(contig_14 - 3725:3865)	(contig_1 - 111435:113138)	0	0	0	0	(contig_14 - 2560:3177)	0	(contig_1 - 551802:553088)	(contig_3 - 2649:3146)	0	(contig_6 - 90322:90708)	(contig_8 - 4043:4708)	(contig_2 - 257077:257877)	(contig_6 - 42270:42692)	(contig_10 - 54643:55275)	(contig_3 - 227891:228265)	(contig_11 - 55623:56036)	(contig_4 - 198220:198642)	(contig_6 - 12429:13397)	(contig_8 - 57784:58605)	0	(contig_1 - 496899:498260)	(contig_10 - 13967:14473)	(contig_8 - 82788:83336)	0
291		H5-19-0341-1	5 (CC5)	survived	no MRSA	0	(contig_14 - 23855:24532)	0	0	(contig_14 - 13144:13755)	(contig_14 - 16169:16948)	(contig_14 - 25243:25422)	(contig_14 - 1985:2173)	(contig_14 - 26055:26825)	(contig_14 - 25550:25951)	(contig_14 - 18001:18168)	(contig_14 - 17038:17844)	(contig_14 - 14108:14527)	0	0	0	0	0	(contig_14 - 3725:3865)	(contig_1 - 111435:113138)	0	0	0	0	(contig_14 - 2560:3177)	0	(contig_1 - 551798:553084)	(contig_2 - 2706:3203)	(contig_2 - 87395:88873)	(contig_4 - 80319:80705)	(contig_4 - 293887:294552)	(contig_3 - 257028:257828)	(contig_4 - 32267:32689)	(contig_10 - 54642:55274)	(contig_2 - 227946:228320)	(contig_9 - 55524:55937)	(contig_2 - 267509:267931)	(contig_4 - 2426:3394)	(contig_4 - 239990:240811)	(contig_9 - 70004:71542)	(contig_1 - 496899:498260)	(contig_10 - 13967:14473)	(contig_4 - 215259:215807)	0
292		H2-17-0641-1	5 (CC5)	died	no MRSA	0	(contig_16 - 23852:24529)	0	0	(contig_16 - 13142:13753)	(contig_16 - 16167:16946)	(contig_16 - 25240:25419)	(contig_16 - 1985:2173)	(contig_16 - 26051:26821)	(contig_16 - 25546:25947)	(contig_16 - 17999:18166)	(contig_16 - 17036:17842)	(contig_16 - 14106:14525)	0	0	0	0	0	(contig_16 - 3725:3865)	(contig_1 - 652807:654510)	0	0	0	0	(contig_16 - 2560:3177)	0	(contig_1 - 212855:214141)	(contig_1 - 768578:769075)	(contig_4 - 154648:156126)	(contig_7 - 57837:58223)	(contig_5 - 59455:60120)	(contig_2 - 125926:126726)	(contig_7 - 105853:106275)	(contig_10 - 54643:55275)	(contig_4 - 15235:15609)	(contig_8 - 55523:55936)	(contig_3 - 23960:24382)	(contig_14 - 20967:21935)	(contig_5 - 113196:114017)	(contig_8 - 70004:71542)	(contig_1 - 267683:269044)	(contig_10 - 13967:14473)	(contig_5 - 138199:138747)	0
293		H2-20-0474-1	5 (CC5)	died	no MRSA	0	0	0	0	0	0	0	0	0	0	0	0	0	0	0	0	0	0	0	(contig_1 - 111434:113137)	0	0	0	0	0	0	(contig_1 - 551806:553092)	(contig_3 - 2593:3090)	(contig_3 - 87282:88760)	(contig_6 - 90185:90571)	(contig_4 - 63735:64400)	(contig_2 - 126019:126819)	(contig_6 - 42270:42692)	(contig_10 - 54642:55274)	(contig_3 - 227835:228209)	(contig_9 - 32081:32494)	(contig_13 - 12022:12444)	(contig_6 - 12429:13397)	(contig_4 - 117476:118297)	(contig_9 - 16475:18013)	(contig_1 - 496903:498264)	(contig_10 - 13967:14473)	(contig_4 - 142480:143028)	0
294		H2-18-0229-1	5 (CC5)	survived	no MRSA	0	(contig_13 - 23856:24533)	0	0	0	(contig_13 - 16171:16950)	(contig_13 - 25244:25423)	(contig_13 - 1985:2173)	(contig_13 - 26056:26826)	(contig_13 - 25551:25952)	(contig_13 - 18003:18170)	(contig_13 - 17040:17846)	(contig_13 - 14110:14529)	0	0	0	0	0	(contig_13 - 3725:3865)	(contig_1 - 652806:654509)	0	0	0	0	(contig_13 - 2560:3177)	0	(contig_1 - 212856:214142)	(contig_3 - 240353:240850)	(contig_3 - 154683:156161)	(contig_6 - 90184:90570)	(contig_7 - 4129:4794)	(contig_2 - 420234:421034)	(contig_6 - 42269:42691)	(contig_10 - 54641:55273)	(contig_3 - 15234:15608)	(contig_9 - 32081:32494)	(contig_4 - 198512:198934)	(contig_6 - 12428:13396)	(contig_7 - 57870:58691)	(contig_9 - 16475:18013)	(contig_1 - 267684:269045)	(contig_10 - 13966:14472)	(contig_7 - 82874:83422)	0
295		H2-20-0609-1	5 (CC5)	survived	no MRSA	0	0	0	0	0	0	0	0	0	0	0	0	0	0	0	0	0	0	0	0	0	(contig_16 - 43947:45152)	0	0	(contig_23 - 21748:22365)	0	(contig_3 - 211976:213262)	(contig_11 - 2706:3203)	(contig_5 - 154684:156162)	(contig_1 - 448159:448545)	(contig_1 - 235477:236142)	(contig_1 - 104696:105496)	(contig_1 - 496038:496460)	(contig_12 - 6634:7266)	(contig_5 - 15235:15609)	(contig_9 - 55625:56038)	(contig_13 - 4107:4529)	(contig_1 - 525333:526301)	(contig_1 - 289407:290036)	0	(contig_3 - 266804:268165)	(contig_12 - 47436:47942)	(contig_1 - 314219:314767)	0
296		H2-20-0660-1	5 (CC5)	died	no MRSA	0	0	0	0	(contig_14 - 13144:13755)	(contig_14 - 16169:16948)	(contig_14 - 25243:25422)	(contig_14 - 1985:2173)	(contig_14 - 26055:26825)	(contig_14 - 25550:25951)	(contig_14 - 18001:18168)	(contig_14 - 17038:17844)	(contig_14 - 14108:14527)	(contig_3 - 26949:27314)	0	0	0	0	(contig_14 - 3725:3865)	(contig_1 - 111434:113137)	0	0	0	0	(contig_14 - 2560:3177)	0	(contig_1 - 551688:552974)	(contig_4 - 2706:3203)	(contig_4 - 87396:88874)	(contig_6 - 68833:69219)	(contig_8 - 4069:4734)	(contig_2 - 256977:257777)	(contig_6 - 116712:117134)	(contig_11 - 6948:7580)	(contig_4 - 227781:228155)	(contig_10 - 55625:56038)	(contig_3 - 67266:67688)	(contig_6 - 145946:146914)	(contig_8 - 57809:58630)	(contig_10 - 70106:71644)	(contig_1 - 496899:498260)	(contig_11 - 47750:48256)	(contig_8 - 82813:83361)	0
297		H2-20-0149-1	5 (CC5)	died	no MRSA	0	0	0	0	0	0	0	0	0	0	0	0	0	0	0	0	0	(contig_3 - 52740:53081)	0	(contig_1 - 111436:113139)	0	0	0	0	0	(contig_3 - 63922:64242)	(contig_1 - 551803:553089)	(contig_3 - 253697:254194)	(contig_3 - 168027:169505)	(contig_2 - 90184:90570)	(contig_2 - 302602:303267)	(contig_2 - 433207:434007)	(contig_2 - 42269:42691)	(contig_8 - 54638:55270)	(contig_3 - 15234:15608)	(contig_9 - 55684:56097)	(contig_4 - 4214:4636)	(contig_2 - 12428:13396)	(contig_2 - 248705:249526)	(contig_9 - 70165:71703)	(contig_1 - 496900:498261)	(contig_8 - 13966:14472)	(contig_2 - 223974:224522)	0
298		H4-18-0006-1	5 (CC5)	survived	no MRSA	0	0	0	0	0	0	0	0	0	0	0	0	0	0	0	0	0	0	0	0	0	0	0	0	0	0	(contig_1 - 551801:553087)	(contig_3 - 2706:3203)	(contig_3 - 87268:88746)	(contig_7 - 90124:90510)	(contig_2 - 143144:143809)	(contig_2 - 273997:274797)	(contig_7 - 42209:42631)	(contig_10 - 54644:55276)	(contig_3 - 227821:228195)	(contig_9 - 55624:56037)	(contig_4 - 198509:198931)	(contig_7 - 12429:13397)	(contig_2 - 89247:90068)	(contig_9 - 70105:71643)	(contig_1 - 496898:498259)	(contig_10 - 13968:14474)	(contig_2 - 64516:65064)	0
299		H2-19-0010-1	5 (CC5)	survived	no MRSA	0	0	0	(contig_8 - 47961:48692)	0	0	0	0	0	0	0	0	0	0	0	0	0	0	0	(contig_1 - 111435:113138)	0	0	0	0	0	0	(contig_1 - 547694:548980)	(contig_3 - 224720:225217)	(contig_3 - 139050:140528)	(contig_6 - 68433:68819)	(contig_4 - 59485:60150)	(contig_2 - 125835:126635)	(contig_6 - 116312:116734)	(contig_12 - 54643:55275)	(contig_17 - 34:408)	(contig_11 - 32075:32488)	(contig_8 - 66889:67311)	(contig_6 - 145607:146575)	(contig_4 - 113226:114047)	(contig_11 - 16469:18007)	(contig_1 - 492791:494152)	(contig_12 - 13967:14473)	(contig_4 - 138230:138778)	0
300		H2-17-0504-1	5 (CC5)	survived	no MRSA	0	0	0	(contig_7 - 102042:102773)	0	0	0	0	0	0	0	0	0	0	0	0	0	0	0	(contig_1 - 111435:113138)	0	0	0	0	0	0	(contig_1 - 547694:548980)	(contig_3 - 2649:3146)	(contig_3 - 87338:88816)	(contig_5 - 90185:90571)	(contig_8 - 143314:143979)	(contig_2 - 257057:257857)	(contig_5 - 42270:42692)	(contig_12 - 6802:7434)	(contig_18 - 34:408)	(contig_11 - 55625:56038)	(contig_7 - 83423:83845)	(contig_5 - 12429:13397)	(contig_8 - 89417:90238)	(contig_11 - 70106:71644)	(contig_1 - 492791:494152)	(contig_12 - 47604:48110)	(contig_8 - 64686:65234)	0
301		H4-17-0270-1	146	survived	no MRSA	0	0	0	0	0	0	0	0	0	0	0	0	0	0	0	0	0	0	0	(contig_1 - 111435:113138)	0	0	0	0	0	0	(contig_1 - 552040:553326)	(contig_4 - 240583:241080)	(contig_4 - 154984:156462)	(contig_3 - 138301:138687)	(contig_3 - 351637:352302)	(contig_2 - 113508:114308)	(contig_3 - 90242:90664)	(contig_11 - 14687:15319)	(contig_4 - 15235:15609)	(contig_9 - 55524:55937)	0	(contig_3 - 60340:61308)	(contig_3 - 297734:298555)	(contig_9 - 70005:71543)	(contig_1 - 497018:498379)	(contig_11 - 55490:55996)	(contig_3 - 272864:273412)	0
302		H2-18-0555-1	146	died	no MRSA	0	0	0	0	0	0	0	0	0	0	0	0	0	0	0	0	0	(contig_5 - 147916:148257)	0	(contig_1 - 370807:372510)	0	0	0	0	0	(contig_5 - 136755:137075)	(contig_9 - 36826:38112)	(contig_3 - 2705:3202)	(contig_3 - 87394:88872)	(contig_2 - 255837:256223)	(contig_8 - 4103:4768)	(contig_7 - 38766:39566)	(contig_2 - 207785:208207)	(contig_15 - 54643:55275)	(contig_3 - 228265:228639)	(contig_10 - 32082:32495)	(contig_18 - 11988:12410)	(contig_2 - 177884:178852)	(contig_8 - 57844:58665)	(contig_10 - 16476:18014)	(contig_9 - 91773:93134)	(contig_15 - 13967:14473)	(contig_8 - 82847:83395)	0
303		H2-20-0077-1	5 (CC5)	survived	no MRSA	0	0	0	0	0	0	0	0	0	0	0	0	0	0	0	0	0	0	0	(contig_1 - 111435:113138)	0	0	0	0	(contig_17 - 18347:18964)	0	(contig_1 - 551692:552978)	(contig_8 - 2706:3203)	(contig_4 - 15102:16580)	(contig_3 - 68435:68821)	(contig_2 - 143270:143935)	(contig_2 - 273766:274566)	(contig_3 - 116451:116873)	(contig_9 - 7001:7633)	(contig_4 - 155953:156327)	(contig_7 - 55624:56037)	(contig_5 - 4214:4636)	(contig_3 - 145744:146712)	(contig_2 - 89373:90194)	0	(contig_1 - 496670:498031)	(contig_9 - 47803:48309)	(contig_2 - 64516:65064)	0
304		H2-20-0252-1	5 (CC5)	survived	no MRSA	0	0	0	0	0	0	0	0	0	0	0	0	0	0	0	0	0	(contig_1 - 323971:324312)	0	(contig_8 - 76494:78197)	0	0	0	0	0	(contig_1 - 335154:335474)	(contig_1 - 296073:297359)	(contig_14 - 69096:69593)	(contig_4 - 15101:16579)	(contig_3 - 255955:256341)	(contig_6 - 4194:4859)	(contig_2 - 125968:126768)	(contig_3 - 207903:208325)	(contig_15 - 6977:7609)	(contig_4 - 155958:156332)	(contig_12 - 55622:56035)	0	(contig_3 - 178001:178969)	(contig_6 - 57935:58756)	0	(contig_1 - 241051:242412)	(contig_15 - 47779:48285)	(contig_6 - 83065:83613)	0
305		H2-20-0114-1	5 (CC5)	died	no MRSA	0	0	0	0	0	0	0	0	0	0	0	0	0	0	0	0	0	0	0	(contig_6 - 111434:113137)	0	0	0	0	0	0	(contig_2 - 384732:386018)	(contig_9 - 2591:3088)	(contig_3 - 210905:212383)	(contig_1 - 601079:601465)	(contig_1 - 387572:388237)	(contig_1 - 256796:257596)	(contig_1 - 649096:649518)	(contig_11 - 6806:7438)	(contig_3 - 71172:71546)	(contig_8 - 32082:32495)	(contig_3 - 31561:31983)	(contig_1 - 678452:679420)	(contig_1 - 441313:442134)	0	(contig_2 - 329943:331304)	(contig_11 - 47608:48114)	(contig_1 - 466443:466991)	0
306		H2-17-0610-1	5 (CC5)	survived	no MRSA	0	0	0	0	0	0	0	0	0	0	0	0	0	0	0	0	0	0	0	(contig_5 - 49865:51568)	0	0	0	0	(contig_18 - 698:1315)	(contig_5 - 164528:164848)	(contig_1 - 73350:74636)	(contig_12 - 69124:69621)	(contig_4 - 14947:16425)	(contig_3 - 256015:256401)	(contig_7 - 4125:4790)	(contig_2 - 125898:126698)	(contig_3 - 207904:208326)	(contig_13 - 6806:7438)	(contig_4 - 154961:155335)	(contig_11 - 55423:55836)	(contig_4 - 194524:194946)	(contig_3 - 178002:178970)	(contig_7 - 57868:58689)	0	(contig_1 - 128297:129658)	(contig_13 - 47610:48116)	(contig_7 - 82998:83546)	0
307		H2-18-0508-1	5 (CC5)	survived	no MRSA	0	0	0	0	0	0	0	0	0	0	0	0	0	0	0	0	0	0	0	(contig_1 - 83298:85001)	0	0	0	0	0	0	(contig_1 - 458173:459459)	(contig_11 - 2706:3203)	(contig_4 - 227133:228611)	(contig_3 - 102669:103055)	(contig_3 - 311214:311879)	(contig_2 - 125884:126684)	(contig_3 - 54561:54983)	(contig_10 - 54643:55275)	(contig_4 - 87365:87739)	(contig_9 - 55624:56037)	(contig_4 - 31519:31941)	(contig_3 - 24659:25627)	(contig_3 - 257317:258138)	0	(contig_1 - 403270:404631)	(contig_10 - 13967:14473)	(contig_3 - 232460:233008)	0
308		H5-18-0223-1	5 (CC5)	survived	no MRSA	0	0	0	0	0	0	0	0	0	0	0	0	0	0	0	0	0	0	0	(contig_4 - 141666:143369)	0	0	0	0	0	0	(contig_1 - 296681:297967)	(contig_9 - 112186:112683)	(contig_5 - 159916:161394)	(contig_3 - 84284:84670)	(contig_3 - 296700:297365)	(contig_2 - 125905:126705)	(contig_3 - 39168:39590)	(contig_13 - 54643:55275)	(contig_5 - 20148:20522)	(contig_11 - 55526:55939)	(contig_14 - 19050:19472)	(contig_3 - 9266:10234)	(contig_3 - 242803:243624)	0	(contig_1 - 241659:243020)	0	(contig_3 - 218073:218621)	0
309		H4-18-0319-1	5 (CC5)	survived	no MRSA	0	0	0	0	0	0	0	0	0	0	0	0	0	0	0	0	0	(contig_3 - 336994:337335)	0	(contig_1 - 111435:113138)	0	0	0	0	0	(contig_3 - 348176:348496)	(contig_1 - 551925:553211)	(contig_8 - 2706:3203)	(contig_4 - 15102:16580)	(contig_3 - 216770:217156)	(contig_3 - 7838:8503)	(contig_2 - 418646:419446)	(contig_3 - 264785:265207)	(contig_9 - 54637:55269)	(contig_4 - 155958:156332)	(contig_7 - 55623:56036)	(contig_5 - 126944:127366)	(contig_3 - 294141:295109)	(contig_3 - 61579:62400)	0	(contig_1 - 496903:498264)	(contig_9 - 13961:14467)	(contig_3 - 86709:87257)	0
310		H2-20-0375-1	5 (CC5)	died	no MRSA	0	0	0	0	0	0	0	0	0	0	0	0	0	0	0	0	0	0	0	(contig_5 - 111435:113138)	0	0	0	0	(contig_15 - 2564:3181)	0	(contig_1 - 212843:214129)	(contig_12 - 22788:23285)	(contig_3 - 14947:16425)	(contig_4 - 255895:256281)	(contig_7 - 143264:143929)	(contig_2 - 102167:102967)	(contig_4 - 207846:208268)	(contig_9 - 6863:7495)	(contig_3 - 155818:156192)	(contig_8 - 45905:46318)	(contig_3 - 195381:195803)	(contig_4 - 177944:178912)	(contig_7 - 89367:90188)	0	(contig_1 - 274477:275838)	(contig_9 - 47665:48171)	(contig_7 - 64510:65058)	0
311		H2-20-0045-1	5 (CC5)	died	no MRSA	0	0	0	0	0	0	0	0	0	0	0	0	0	0	0	0	0	0	0	(contig_1 - 111435:113138)	0	0	0	0	0	0	(contig_5 - 7883:9169)	(contig_10 - 74683:75180)	(contig_4 - 14947:16425)	(contig_3 - 68434:68820)	(contig_6 - 27708:28373)	(contig_2 - 419779:420579)	(contig_3 - 116450:116872)	(contig_11 - 52807:53439)	(contig_4 - 155818:156192)	(contig_9 - 32080:32493)	(contig_4 - 195381:195803)	(contig_3 - 145806:146774)	(contig_6 - 81449:82270)	0	(contig_1 - 495505:496866)	(contig_11 - 12132:12638)	(contig_6 - 106579:107127)	0
312		H4-18-0247-1	5 (CC5)	survived	no MRSA	0	0	0	0	0	0	0	0	0	0	0	0	0	0	0	0	0	0	0	(contig_3 - 111435:113138)	0	(contig_4 - 274144:275349)	0	0	0	0	(contig_4 - 212854:214140)	(contig_10 - 2593:3090)	(contig_5 - 174582:176060)	(contig_2 - 183247:183633)	(contig_14 - 24885:25550)	(contig_1 - 187968:188768)	(contig_2 - 231262:231684)	(contig_1 - 54644:55276)	(contig_5 - 34816:35190)	(contig_7 - 55624:56037)	(contig_6 - 182607:183029)	(contig_2 - 260619:261587)	(contig_2 - 28200:29021)	0	(contig_4 - 267801:269162)	(contig_1 - 13967:14473)	(contig_2 - 53330:53878)	0
313		H2-20-0455-1	5 (CC5)	survived	no MRSA	0	0	0	0	0	0	0	0	0	0	0	0	0	0	0	0	0	0	0	(contig_1 - 111307:113010)	(contig_1 - 417360:417431)	(contig_1 - 429978:431183)	0	0	0	0	(contig_1 - 595833:597119)	(contig_11 - 69096:69593)	(contig_3 - 15102:16580)	(contig_4 - 138345:138731)	(contig_6 - 4230:4895)	(contig_2 - 257198:257998)	(contig_4 - 90293:90715)	(contig_12 - 6864:7496)	(contig_3 - 155975:156349)	(contig_9 - 55524:55937)	(contig_5 - 182441:182863)	(contig_4 - 60391:61359)	(contig_6 - 57972:58793)	0	(contig_1 - 540871:542232)	(contig_12 - 47594:48100)	(contig_6 - 83102:83650)	0
314		H2-18-0038-1	5 (CC5)	survived	no MRSA	0	0	0	0	0	0	0	0	0	0	0	0	0	0	0	0	0	0	0	(contig_4 - 141666:143369)	(contig_2 - 161913:161984)	(contig_2 - 174531:175736)	0	0	(contig_17 - 18348:18965)	0	(contig_2 - 340444:341730)	(contig_10 - 68843:69340)	(contig_5 - 174584:176062)	(contig_3 - 255581:255967)	(contig_3 - 468125:468790)	(contig_1 - 125882:126682)	(contig_3 - 207720:208142)	(contig_11 - 6878:7510)	(contig_5 - 34817:35191)	(contig_8 - 55625:56038)	(contig_6 - 182457:182879)	(contig_3 - 177940:178908)	(contig_3 - 414228:415049)	0	(contig_2 - 285423:286784)	(contig_11 - 47680:48186)	(contig_3 - 389371:389919)	0
315		H5-18-0229-1	5 (CC5)	survived	no MRSA	0	0	0	0	0	0	0	0	0	0	0	0	0	0	0	0	0	0	0	(contig_1 - 111435:113138)	(contig_2 - 165806:165877)	0	0	0	(contig_17 - 698:1315)	0	(contig_1 - 551952:553238)	(contig_12 - 69096:69593)	(contig_3 - 15038:16516)	(contig_4 - 68434:68820)	(contig_6 - 143271:143936)	(contig_2 - 464130:464930)	(contig_4 - 116259:116681)	(contig_13 - 54643:55275)	(contig_3 - 155912:156286)	(contig_10 - 55523:55936)	(contig_5 - 4214:4636)	(contig_4 - 145615:146583)	(contig_6 - 89374:90195)	0	(contig_1 - 496990:498351)	(contig_13 - 13967:14473)	(contig_6 - 64517:65065)	0
316		H4-17-0326-1	5 (CC5)	survived	no MRSA	0	0	0	0	0	0	0	0	0	0	0	0	0	0	0	0	0	(contig_8 - 88121:88462)	0	(contig_4 - 76557:78260)	0	0	0	0	(contig_21 - 2564:3181)	(contig_8 - 76960:77280)	(contig_6 - 56627:57913)	(contig_14 - 2706:3203)	(contig_5 - 191406:192884)	(contig_2 - 255107:255493)	(contig_8 - 156611:157276)	(contig_1 - 37948:38748)	(contig_2 - 207846:208268)	(contig_15 - 54643:55275)	(contig_5 - 51637:52011)	(contig_10 - 32132:32545)	(contig_5 - 12026:12448)	(contig_2 - 177943:178911)	(contig_8 - 102715:103536)	0	(contig_6 - 1605:2966)	(contig_15 - 13967:14473)	(contig_8 - 64516:65064)	0
317		H4-17-0279-1	5 (CC5)	survived	no MRSA	0	0	0	0	0	0	0	0	0	0	0	0	0	0	0	0	0	(contig_5 - 77221:77562)	0	(contig_1 - 111498:113201)	0	0	0	0	(contig_15 - 2564:3181)	(contig_5 - 88403:88723)	(contig_1 - 551753:553039)	(contig_10 - 69097:69594)	(contig_3 - 362124:363602)	(contig_4 - 68434:68820)	(contig_5 - 8407:9072)	(contig_2 - 37947:38747)	(contig_4 - 115659:116081)	(contig_11 - 6815:7447)	(contig_3 - 222355:222729)	(contig_7 - 31974:32387)	(contig_3 - 182744:183166)	(contig_4 - 145016:145984)	(contig_5 - 62147:62968)	0	(contig_1 - 496731:498092)	(contig_11 - 47617:48123)	(contig_5 - 100619:101167)	0
318		H4-17-0183-1	5 (CC5)	died	no MRSA	0	0	0	0	0	0	0	0	0	0	0	0	0	(contig_3 - 197712:198077)	0	0	0	(contig_1 - 345317:345658)	0	(contig_5 - 134319:136022)	0	0	0	0	(contig_17 - 18348:18965)	(contig_1 - 334156:334476)	(contig_2 - 304571:305857)	(contig_8 - 2706:3203)	(contig_3 - 14943:16421)	(contig_4 - 255707:256093)	(contig_6 - 4158:4823)	(contig_1 - 432799:433599)	(contig_4 - 207846:208268)	(contig_9 - 6940:7572)	(contig_3 - 155817:156191)	(contig_10 - 55524:55937)	(contig_3 - 238929:239351)	(contig_4 - 178005:178973)	(contig_6 - 57899:58720)	0	(contig_2 - 249548:250909)	(contig_9 - 47741:48247)	(contig_6 - 83029:83577)	0
319		H1-17-0406-1	5 (CC5)	survived	no MRSA	0	0	0	0	0	0	0	0	0	0	0	0	0	0	0	0	0	(contig_1 - 334793:335134)	0	(contig_5 - 76494:78197)	0	0	0	0	(contig_16 - 2564:3181)	(contig_1 - 345975:346295)	(contig_2 - 289252:290538)	(contig_11 - 2603:3100)	(contig_4 - 14947:16425)	(contig_1 - 255896:256282)	(contig_1 - 482550:483215)	(contig_3 - 125896:126696)	(contig_1 - 207844:208266)	(contig_12 - 54643:55275)	(contig_4 - 155820:156194)	(contig_8 - 32240:32653)	(contig_4 - 195383:195805)	(contig_1 - 177942:178910)	(contig_1 - 428653:429474)	0	(contig_2 - 234230:235591)	(contig_12 - 13967:14473)	0	0
320		H2-20-0346-1	5 (CC5)	survived	no MRSA	0	0	0	0	0	0	0	0	0	0	0	0	0	0	0	0	0	0	0	(contig_5 - 111434:113137)	0	0	0	0	0	0	(contig_2 - 290088:291374)	(contig_10 - 2717:3214)	(contig_3 - 362050:363528)	(contig_4 - 49547:49933)	(contig_6 - 23075:23740)	(contig_1 - 125662:126462)	(contig_4 - 97372:97794)	(contig_11 - 54643:55275)	(contig_3 - 222278:222652)	(contig_8 - 32082:32495)	(contig_3 - 182667:183089)	(contig_4 - 126606:127574)	0	0	(contig_2 - 235066:236427)	(contig_11 - 13967:14473)	(contig_6 - 101946:102494)	0
321		H2-20-0343-1	5 (CC5)	survived	no MRSA	0	0	0	0	0	0	0	0	0	0	0	0	0	0	0	0	0	0	0	(contig_5 - 111434:113137)	0	0	0	0	0	0	(contig_2 - 290088:291374)	(contig_10 - 2706:3203)	(contig_3 - 362100:363578)	(contig_4 - 68434:68820)	(contig_6 - 143489:144154)	(contig_1 - 419107:419907)	(contig_4 - 116259:116681)	(contig_11 - 11163:11795)	(contig_3 - 222328:222702)	(contig_8 - 32082:32495)	(contig_3 - 182717:183139)	(contig_4 - 145493:146461)	0	0	(contig_2 - 235066:236427)	(contig_11 - 51965:52471)	(contig_6 - 64735:65283)	0
322		H2-18-0145-1	-	died	no MRSA	0	0	0	0	0	0	0	0	0	0	0	0	0	0	0	0	0	(contig_5 - 104931:105272)	0	0	0	0	0	0	0	(contig_5 - 116113:116433)	0	0	0	0	0	(contig_4 - 75739:76539)	0	0	0	0	0	(contig_2 - 128052:129020)	(contig_4 - 262006:262827)	0	(contig_1 - 217553:218914)	0	0	0
323		H1-17-0501-1	101	survived	no MRSA	0	0	0	0	0	0	0	0	0	0	0	0	0	0	0	0	0	0	0	0	0	0	0	0	0	0	0	0	0	0	0	(contig_2 - 429915:430715)	0	0	0	0	0	(contig_3 - 128048:129016)	(contig_9 - 17561:18382)	0	(contig_1 - 221222:222583)	0	0	0
324		H2-18-0150-1	-	survived	no MRSA	0	0	0	0	0	0	0	0	0	0	0	0	0	0	0	0	0	(contig_7 - 94095:94436)	0	0	(contig_12 - 31154:31225)	(contig_12 - 45481:46686)	0	0	0	(contig_7 - 105277:105597)	0	0	0	0	0	(contig_2 - 127894:128694)	0	0	0	0	0	(contig_3 - 214986:215954)	(contig_8 - 17599:18420)	0	(contig_4 - 104963:106324)	0	0	0
325		H4-17-0381-1	101	died	no MRSA	0	0	0	0	0	0	0	0	0	0	0	0	0	0	0	0	0	0	0	0	0	0	0	0	0	0	0	0	0	0	0	(contig_2 - 430104:430904)	0	0	0	0	0	(contig_3 - 177125:178093)	(contig_2 - 615897:616718)	0	(contig_1 - 42595:43956)	0	0	0
326		H2-20-0601-1	101	survived	no MRSA	0	0	0	0	0	0	0	0	0	0	0	0	0	0	0	0	0	0	0	0	(contig_1 - 949651:949722)	0	0	0	0	0	0	0	0	0	0	(contig_2 - 429691:430491)	0	0	0	0	0	(contig_3 - 128108:129076)	(contig_2 - 613923:614744)	0	(contig_1 - 1072076:1073437)	0	0	0
327		H5-17-0030-1	101	survived	no MRSA	0	0	0	0	0	0	0	0	0	0	0	0	0	0	0	0	0	0	0	0	0	0	0	0	0	0	0	0	0	0	0	(contig_2 - 38725:39525)	0	0	0	0	0	(contig_3 - 214540:215508)	(contig_7 - 57920:58741)	0	(contig_1 - 1020324:1021685)	0	0	0
328		H2-20-0573-1	101	survived	no MRSA	0	0	0	0	0	0	0	0	0	0	0	0	0	0	0	0	0	0	0	0	0	0	0	0	0	0	0	0	0	0	0	(contig_2 - 202174:202974)	0	0	0	0	0	(contig_3 - 127826:128794)	(contig_2 - 17599:18420)	0	(contig_1 - 272368:273729)	0	0	0
329		H5-17-0146-1	101	survived	no MRSA	0	0	0	0	0	0	0	0	0	0	0	0	0	0	0	0	0	0	0	0	(contig_10 - 31366:31437)	0	0	0	0	0	0	0	0	0	0	(contig_2 - 429831:430631)	0	0	0	0	0	(contig_4 - 125204:126172)	(contig_2 - 616090:616911)	0	0	0	0	0
330		H4-18-0196-1	101	survived	no MRSA	0	0	0	(contig_11 - 4895:5626)	0	0	0	0	0	0	0	0	0	0	0	0	0	0	0	0	(contig_11 - 17978:18049)	(contig_11 - 2517:3722)	0	0	0	0	0	0	0	0	0	(contig_2 - 380032:380832)	0	0	0	0	0	(contig_3 - 177373:178341)	(contig_8 - 57841:58662)	0	(contig_4 - 104964:106325)	0	0	0
331		H2-20-0432-1	101	survived	no MRSA	0	0	0	0	0	0	0	0	0	0	0	0	0	0	0	0	0	0	0	0	0	0	0	0	0	0	0	0	0	0	0	(contig_2 - 425048:425848)	0	0	0	0	0	(contig_3 - 128054:129022)	(contig_7 - 17599:18420)	0	0	0	0	0
332		H2-20-0361-1	101	survived	no MRSA	0	0	0	0	0	0	0	0	0	0	0	0	0	0	0	0	0	0	0	0	0	0	0	0	0	0	0	0	0	0	0	(contig_2 - 203752:204552)	0	0	0	0	0	(contig_3 - 177851:178819)	(contig_2 - 17598:18419)	0	(contig_1 - 1018169:1019530)	0	0	0
333		H4-17-0252-1	101	survived	no MRSA	0	0	0	0	0	0	0	0	0	0	0	0	0	0	0	0	0	0	0	0	(contig_1 - 938366:938437)	0	0	0	0	0	0	0	0	0	0	(contig_2 - 429731:430531)	0	0	0	0	0	0	(contig_2 - 615702:616523)	0	(contig_1 - 1060794:1062155)	0	0	0
334		H2-20-0182-1	101	died	no MRSA	0	0	0	0	0	0	0	0	0	0	0	0	0	0	0	0	0	0	0	0	0	0	0	0	0	0	0	0	0	0	0	(contig_2 - 429988:430788)	0	0	0	0	0	(contig_3 - 127885:128853)	(contig_7 - 57805:58626)	0	(contig_1 - 285756:287117)	0	0	0
335		H4-18-0463-1	207	survived	no MRSA	0	0	0	0	0	0	0	0	0	0	0	0	0	0	0	0	0	0	0	0	0	0	0	(contig_20 - 36671:37393)	0	0	0	0	0	0	0	(contig_1 - 274891:275691)	0	0	0	0	0	0	0	0	0	0	(contig_32 - 19659:20207)	0
336		H2-19-0048-1	509	died	no MRSA	0	0	(contig_10 - 85941:86033)	0	0	0	0	0	0	0	0	0	0	(contig_23 - 8700:9065)	0	0	0	0	0	0	0	0	0	(contig_45 - 8029:8751)	0	0	0	0	0	0	0	(contig_10 - 74219:75019)	0	0	0	0	0	0	0	0	0	0	(contig_24 - 22606:23154)	0
337		H4-18-0328-1	22 (CC22)	survived	no MRSA	0	0	0	0	0	0	0	0	0	0	0	0	0	0	0	0	0	0	0	0	0	0	0	0	0	0	0	0	0	0	0	0	0	0	0	0	0	0	0	0	0	(contig_1 - 190008:190514)	0	0
338		H5-17-0116-1	22 (CC22)	died	no MRSA	0	0	0	0	0	0	0	0	0	0	0	0	0	0	0	0	0	0	0	0	0	0	0	0	0	0	0	0	0	0	0	0	0	0	0	0	0	0	0	0	0	(contig_4 - 190643:191149)	0	(contig_9 - 71339:72250)
339		H4-17-0229-1	22 (CC22)	survived	no MRSA	0	0	0	0	0	0	0	0	0	0	0	0	0	0	0	0	0	0	0	0	0	0	0	0	0	0	0	0	0	0	0	0	0	0	0	0	0	0	0	0	0	(contig_3 - 198025:198531)	0	(contig_7 - 80899:81810)
340		H4-18-0183-1	22 (CC22)	survived	no MRSA	0	0	0	0	0	0	0	0	0	0	0	0	0	0	0	0	0	0	0	0	0	0	0	0	0	0	0	0	0	0	0	0	0	0	0	0	0	0	0	0	0	(contig_10 - 87900:88406)	0	(contig_13 - 41495:42406)
341		H2-18-0734-1	22 (CC22)	survived	no MRSA	0	0	0	0	0	0	0	0	0	0	0	0	0	0	0	0	0	0	0	0	0	0	0	0	0	0	0	0	0	0	0	0	0	0	0	0	0	0	0	0	0	(contig_1 - 188865:189371)	0	(contig_6 - 25257:26168)
342		H5-20-0138-1	22 (CC22)	survived	no MRSA	0	0	0	0	0	0	0	0	0	0	0	0	0	0	0	0	0	0	0	0	0	0	0	0	0	0	0	0	0	0	0	0	0	0	0	0	0	0	0	0	0	(contig_16 - 36561:37067)	0	(contig_22 - 25298:26209)
343		H2-18-0506-1	22 (CC22)	survived	no MRSA	0	0	0	0	0	0	0	0	0	0	0	0	0	0	0	0	0	0	0	0	0	0	0	0	0	0	0	0	0	0	0	0	0	0	0	0	0	0	0	0	0	(contig_2 - 265661:266167)	0	(contig_9 - 77429:78340)
344		H2-18-0420-1	22 (CC22)	survived	no MRSA	0	0	0	0	0	0	0	0	0	0	0	0	0	0	0	0	0	(contig_2 - 88501:88842)	0	0	0	0	0	0	0	(contig_2 - 99683:100003)	0	0	0	0	0	0	0	0	0	0	0	0	0	0	0	(contig_3 - 294658:295164)	0	(contig_4 - 137244:138155)
345		H4-18-0033-1	22 (CC22)	survived	no MRSA	0	0	0	0	0	0	0	0	0	0	0	0	0	0	0	0	0	0	0	0	0	0	0	0	0	0	0	0	0	0	0	0	0	0	0	0	0	0	0	0	0	(contig_7 - 87574:88080)	0	(contig_5 - 41509:42420)
346		H4-18-0285-1	22 (CC22)	survived	no MRSA	0	0	0	0	0	0	0	0	0	0	0	0	0	0	0	0	0	0	0	0	0	0	0	0	0	0	0	0	0	0	0	0	0	0	0	0	0	0	0	0	0	(contig_2 - 14909:15415)	0	(contig_11 - 38396:39307)
347		H2-18-0324-1	22 (CC22)	survived	no MRSA	0	0	0	0	0	0	0	0	0	0	0	0	0	0	0	0	0	0	0	0	0	0	0	0	0	0	0	0	0	0	0	0	0	0	0	0	0	0	0	0	0	(contig_4 - 14908:15414)	0	(contig_12 - 46854:47765)
348		H1-18-0073-1	4155	survived	no MRSA	0	0	0	0	0	0	0	0	0	0	0	0	0	0	0	0	0	0	0	0	0	0	0	0	(contig_24 - 16191:16808)	0	0	0	0	0	0	0	0	0	0	0	0	0	0	0	0	(contig_8 - 952:1458)	0	0
349		H2-20-0583-1	22 (CC22)	died	no MRSA	0	0	0	0	0	0	0	0	0	0	0	0	0	0	0	0	0	(contig_7 - 119817:120158)	0	0	0	0	0	0	0	(contig_7 - 108656:108976)	0	0	0	0	0	0	0	0	0	0	0	0	0	0	0	(contig_2 - 100123:100629)	0	(contig_7 - 41440:42351)
350		H2-20-0522-1	22 (CC22)	survived	no MRSA	0	0	0	0	0	0	0	0	0	0	0	0	0	0	0	0	0	0	0	0	0	0	0	0	0	0	0	0	0	0	0	0	0	0	0	0	0	0	0	0	0	(contig_2 - 99217:99723)	0	(contig_5 - 129696:130607)
351		H2-17-0503-1	22 (CC22)	survived	no MRSA	0	0	0	0	0	0	0	0	0	0	0	0	0	0	0	0	0	0	0	0	0	0	0	0	0	0	0	0	0	0	0	0	0	0	0	0	0	0	0	0	0	(contig_2 - 47216:47722)	0	(contig_5 - 41508:42419)
352		H5-18-0320-1	22 (CC22)	survived	no MRSA	0	0	0	0	0	0	0	0	0	0	0	0	0	0	0	0	0	0	0	0	0	0	0	0	0	0	0	0	0	0	0	0	0	0	0	0	0	0	0	0	0	(contig_1 - 294858:295364)	0	(contig_7 - 55419:56330)
353		H5-18-0245-1	8388	survived	no MRSA	0	0	0	0	0	0	0	0	0	0	0	0	0	0	0	0	0	0	0	0	0	0	0	0	0	0	0	0	0	0	0	0	0	0	0	0	0	0	0	0	0	(contig_1 - 99123:99629)	0	(contig_11 - 63722:64633)
354		H2-20-0607-1	22 (CC22)	survived	no MRSA	0	0	0	0	0	0	0	0	0	0	0	0	0	0	0	0	0	0	0	0	0	0	0	0	0	0	0	0	0	0	0	0	0	0	0	0	0	0	0	0	0	(contig_1 - 103584:104090)	0	(contig_8 - 53108:54019)
355		H2-18-0022-1	22 (CC22)	survived	no MRSA	0	0	0	0	0	0	0	0	0	0	0	0	0	0	0	0	0	0	0	0	0	0	0	0	0	0	0	0	0	0	0	0	0	0	0	0	0	0	0	0	0	(contig_1 - 294296:294802)	0	(contig_13 - 22583:23494)
356		H5-18-0051-1	22 (CC22)	survived	no MRSA	0	0	0	0	0	0	0	0	0	0	0	0	0	0	0	0	0	0	0	0	0	0	0	0	0	0	0	0	0	0	0	0	0	0	0	0	0	0	0	0	0	(contig_4 - 58322:58828)	0	(contig_6 - 74507:75418)
357		H4-17-0191-1	22 (CC22)	survived	no MRSA	0	0	0	0	0	0	0	0	0	0	0	0	0	0	0	0	0	0	0	0	0	0	0	0	0	0	0	0	0	0	0	0	0	0	0	0	0	0	0	0	0	(contig_1 - 98018:98524)	0	(contig_11 - 63375:64286)
358		H2-20-0075-1	22 (CC22)	survived	no MRSA	0	0	0	0	0	0	0	0	0	0	0	0	0	0	0	0	0	0	0	0	0	0	0	0	0	0	0	0	0	0	0	0	0	0	0	0	0	0	0	0	0	(contig_6 - 12271:12777)	0	(contig_11 - 41507:42418)
359		H2-20-0401-1	22 (CC22)	survived	no MRSA	0	0	0	0	0	0	0	0	0	0	0	0	0	0	0	0	0	0	0	0	0	0	0	0	0	0	0	0	0	0	0	0	0	0	0	0	0	0	0	0	0	(contig_3 - 218218:218724)	0	0
360		H2-18-0466-1	22 (CC22)	survived	no MRSA	0	0	0	0	0	0	0	0	0	0	0	0	0	0	0	0	0	0	0	0	0	0	0	0	0	0	0	0	0	0	0	0	0	0	0	0	0	0	0	0	0	(contig_2 - 290783:291289)	0	(contig_1 - 278413:279324)
361		H4-18-0275-1	22 (CC22)	survived	no MRSA	0	0	0	0	0	0	0	0	0	0	0	0	0	0	0	0	0	0	0	0	0	0	0	0	0	0	0	0	0	0	0	0	0	0	0	0	0	0	0	0	0	(contig_10 - 99822:100328)	0	(contig_3 - 137239:138150)
362		H3-17-0184-1	22 (CC22)	survived	no MRSA	0	0	0	0	0	0	0	0	0	0	0	0	0	0	0	0	0	0	0	0	0	0	0	0	0	0	0	0	0	0	0	0	0	0	0	0	0	0	0	0	0	(contig_1 - 47672:48178)	0	(contig_12 - 19372:20283)
363		H4-18-0344-1	-	survived	no MRSA	0	0	0	0	0	0	0	0	0	0	0	0	0	0	0	0	0	0	0	0	0	0	0	0	0	0	0	0	0	0	0	0	0	0	0	0	0	0	0	0	0	(contig_2 - 99128:99634)	0	(contig_5 - 120628:121539)
364		H4-18-0140-1	737	survived	no MRSA	0	0	0	0	0	0	0	0	0	0	0	0	0	0	0	0	0	0	0	0	0	0	0	0	0	0	0	0	0	0	0	0	0	0	0	0	0	0	0	0	0	(contig_2 - 179490:179996)	0	(contig_5 - 41509:42420)
365		H4-18-0035-1	737	survived	no MRSA	0	0	0	0	0	0	0	0	0	0	0	0	0	0	0	0	0	0	0	0	0	0	0	0	0	0	0	0	0	0	0	0	0	0	0	0	0	0	0	0	0	(contig_3 - 99821:100327)	0	(contig_7 - 137372:138283)
366		H2-17-0328-1	-	died	MRSA	0	0	0	(contig_9 - 8787:9518)	0	0	0	0	0	0	0	0	0	0	0	0	0	0	0	0	(contig_25 - 2203:2274)	(contig_9 - 10691:11896)	0	0	0	0	0	0	0	0	0	0	0	0	0	0	0	0	0	0	0	(contig_12 - 58347:58853)	0	(contig_17 - 43985:44896)
367		H2-20-0345-1	22 (CC22)	survived	no MRSA	0	0	0	(contig_1 - 38564:39295)	0	0	0	0	0	0	0	0	0	0	0	0	0	0	0	0	(contig_1 - 27512:27583)	(contig_1 - 40468:41673)	0	0	0	0	0	0	0	0	0	0	0	0	0	0	0	0	0	0	0	(contig_2 - 47851:48357)	0	(contig_12 - 44018:44929)
368		H2-18-0418-1	22 (CC22)	survived	MRSA	0	0	0	(contig_2 - 333947:334678)	0	0	0	0	0	0	0	0	0	0	0	0	0	0	0	0	(contig_2 - 345660:345731)	(contig_2 - 331569:332774)	0	0	0	0	0	0	0	0	0	0	0	0	0	0	0	0	0	0	0	(contig_1 - 99699:100205)	0	(contig_14 - 44018:44929)
369		H1-18-0576-1	22 (CC22)	survived	MRSA	0	0	0	(contig_18 - 38565:39296)	0	0	0	0	0	0	0	0	0	0	0	0	0	0	0	0	(contig_18 - 27512:27583)	(contig_18 - 40469:41674)	0	0	0	0	0	0	0	0	0	0	0	0	0	0	0	0	0	0	0	(contig_6 - 86582:87088)	0	(contig_14 - 41507:42418)
370		H2-17-0405-1	22 (CC22)	survived	MRSA	0	0	0	(contig_1 - 308718:309449)	0	0	0	0	0	0	0	0	0	0	0	0	0	0	0	0	(contig_1 - 320431:320502)	(contig_1 - 306340:307545)	0	0	0	0	0	0	0	0	0	0	0	0	0	0	0	0	0	0	0	(contig_3 - 184424:184930)	0	0
371		H4-18-0441-1	22 (CC22)	died	MRSA	0	0	0	(contig_2 - 38564:39295)	0	0	0	0	0	0	0	0	0	0	0	0	0	0	0	0	(contig_2 - 27512:27583)	(contig_2 - 40468:41673)	0	0	0	0	0	0	0	0	0	0	0	0	0	0	0	0	0	0	0	(contig_1 - 294962:295468)	0	(contig_14 - 41496:42407)
372		H2-20-0437-1	22 (CC22)	survived	MRSA	0	0	0	(contig_2 - 286869:287600)	0	0	0	0	0	0	0	0	0	0	0	0	0	0	0	0	(contig_2 - 298582:298653)	(contig_2 - 284491:285696)	0	0	0	0	0	0	0	0	0	0	0	0	0	0	0	0	0	0	0	(contig_1 - 99822:100328)	0	(contig_13 - 41494:42405)
373		H4-17-0224-1	22 (CC22)	survived	MRSA	0	0	0	(contig_1 - 38548:39279)	0	0	0	0	0	0	0	0	0	0	0	0	0	0	0	0	(contig_1 - 27495:27566)	(contig_1 - 40452:41657)	0	0	0	0	0	0	0	0	0	0	0	0	0	0	0	0	0	0	0	(contig_3 - 184114:184620)	0	(contig_13 - 41474:42385)
374		H4-17-0115-1	22 (CC22)	died	no MRSA	0	0	0	(contig_1 - 277394:278125)	0	0	0	0	0	0	0	0	0	0	0	0	0	0	0	0	(contig_1 - 266341:266412)	(contig_1 - 279298:280503)	0	0	0	0	0	0	0	0	0	0	0	0	0	0	0	0	0	0	0	(contig_7 - 47115:47621)	0	(contig_4 - 41110:42021)
375		H4-18-0133-1	22 (CC22)	died	MRSA	0	0	0	(contig_2 - 308719:309450)	0	0	0	0	0	0	0	0	0	0	0	0	0	0	0	0	(contig_2 - 320432:320503)	(contig_2 - 306341:307546)	0	0	0	0	0	0	0	0	0	0	0	0	0	0	0	0	0	0	0	(contig_1 - 294982:295488)	0	(contig_5 - 127360:128271)
376		H2-17-0309-1	22 (CC22)	survived	MRSA	0	0	0	(contig_2 - 308719:309450)	0	0	0	0	0	0	0	0	0	0	0	0	0	0	0	0	(contig_2 - 320432:320503)	(contig_2 - 306341:307546)	0	0	0	0	0	0	0	0	0	0	0	0	0	0	0	0	0	0	0	(contig_1 - 294549:295055)	0	(contig_14 - 44018:44929)
377		H4-17-0338-1	22 (CC22)	survived	MRSA	0	0	0	(contig_1 - 38544:39275)	0	0	0	0	0	0	0	0	0	0	0	0	0	0	0	0	(contig_1 - 27492:27563)	(contig_1 - 40448:41653)	0	0	0	0	0	0	0	0	0	0	0	0	0	0	0	0	0	0	0	(contig_2 - 47790:48296)	0	(contig_14 - 41495:42406)
378		H4-17-0096-1	22 (CC22)	survived	MRSA	0	0	0	(contig_2 - 308719:309450)	0	0	0	0	0	0	0	0	0	0	0	0	0	0	0	0	(contig_2 - 320431:320502)	(contig_2 - 306341:307546)	0	0	0	0	0	0	0	0	0	0	0	0	0	0	0	0	0	0	0	(contig_1 - 295066:295572)	0	(contig_14 - 44018:44929)
379		H5-18-0394-1	22 (CC22)	survived	MRSA	0	0	0	(contig_1 - 308718:309449)	0	0	0	0	0	0	0	0	0	0	0	0	0	0	0	0	(contig_1 - 320426:320497)	(contig_1 - 306340:307545)	0	0	0	0	0	0	0	0	0	0	0	0	0	0	0	0	0	0	0	(contig_7 - 49283:49789)	0	(contig_14 - 44018:44929)
380		H4-17-0084-1	22 (CC22)	died	MRSA	0	0	0	(contig_1 - 38548:39279)	0	0	0	0	0	0	0	0	0	0	0	0	0	0	0	0	(contig_1 - 27495:27566)	(contig_1 - 40452:41657)	0	0	0	0	0	0	0	0	0	0	0	0	0	0	0	0	0	0	0	(contig_4 - 184608:185114)	0	(contig_15 - 44018:44929)
381		H2-18-0352-1	22 (CC22)	survived	no MRSA	0	0	0	0	0	0	0	0	0	0	0	0	0	0	0	0	0	0	0	0	0	0	0	0	0	0	0	0	0	0	0	0	0	0	0	0	0	0	0	0	0	(contig_1 - 47815:48321)	0	(contig_10 - 41569:42480)
382		H4-17-0288-1	22 (CC22)	survived	no MRSA	0	0	0	0	0	0	0	0	0	0	0	0	0	(contig_3 - 99336:99701)	0	0	0	0	0	0	0	0	0	0	0	0	0	0	0	0	0	0	0	0	0	0	0	0	0	0	0	(contig_11 - 44801:45307)	0	(contig_24 - 25264:26175)
383		H2-17-0478-1	22 (CC22)	survived	no MRSA	0	0	0	0	0	0	0	0	0	0	0	0	0	0	0	0	0	0	0	0	0	0	0	0	0	0	0	0	0	0	0	0	0	0	0	0	0	0	0	0	0	(contig_2 - 296966:297472)	0	(contig_13 - 41526:42437)
384		H4-18-0455-1	22 (CC22)	died	no MRSA	0	0	(contig_13 - 44726:44818)	(contig_43 - 512:1243)	0	0	0	0	0	0	0	0	0	0	0	0	0	(contig_37 - 11652:11993)	0	0	0	(contig_43 - 2416:3621)	0	0	0	(contig_37 - 491:811)	0	0	0	0	0	0	0	0	0	0	0	0	0	0	0	(contig_1 - 294446:294952)	0	(contig_15 - 22884:23795)
385		H4-18-0350-1	22 (CC22)	survived	no MRSA	0	0	0	0	0	0	0	0	0	0	0	0	0	0	0	0	0	(contig_22 - 21421:21762)	0	0	0	0	0	0	0	(contig_22 - 10260:10580)	0	0	0	0	0	0	0	0	0	0	0	0	0	0	0	(contig_2 - 99821:100327)	0	(contig_9 - 67002:67913)
386		H4-17-0100-1	22 (CC22)	survived	no MRSA	0	0	0	0	0	0	0	0	0	0	0	0	0	0	0	0	0	(contig_22 - 18225:18566)	0	0	0	0	0	0	0	(contig_22 - 7064:7384)	0	0	0	0	0	0	0	0	0	0	0	0	0	0	0	(contig_1 - 297232:297738)	0	(contig_18 - 11820:12731)
387		H2-18-0119-1	22 (CC22)	died	MRSA	0	0	0	0	0	0	0	0	0	0	0	0	0	0	0	0	0	0	0	0	0	0	0	0	0	0	0	0	0	0	0	0	0	0	0	0	0	0	0	0	0	(contig_1 - 99822:100328)	0	(contig_16 - 22884:23795)
388		H4-17-0087-1	22 (CC22)	survived	no MRSA	0	0	(contig_11 - 33519:33611)	0	0	0	0	0	0	0	0	0	0	0	0	0	0	0	0	0	0	0	0	0	0	0	0	0	0	0	0	0	0	0	0	0	0	0	0	0	0	(contig_2 - 99822:100328)	0	(contig_18 - 41535:42446)
389		H2-18-0659-1	22 (CC22)	survived	no MRSA	0	0	(contig_12 - 44717:44809)	0	0	0	0	0	0	0	0	0	0	0	0	0	0	0	0	0	0	0	0	0	0	0	0	0	0	0	0	0	0	0	0	0	0	0	0	0	0	(contig_15 - 58305:58811)	0	(contig_32 - 7188:8099)
390		H2-17-0560-1	-	died	no MRSA	0	0	(contig_10 - 44718:44810)	0	0	0	0	0	0	0	0	0	0	0	0	0	0	0	0	0	0	0	0	0	0	(contig_42 - 488:808)	0	0	0	0	0	0	0	0	0	0	0	0	0	0	0	(contig_1 - 276811:277317)	0	(contig_13 - 22887:23798)
391		H2-17-0480-1	22 (CC22)	died	no MRSA	0	0	(contig_21 - 14434:14526)	0	0	0	0	0	0	0	0	0	0	(contig_31 - 9493:9858)	0	0	0	0	0	0	0	0	0	0	0	0	0	0	0	0	0	0	0	0	0	0	0	0	0	0	0	(contig_2 - 103540:104046)	0	(contig_33 - 11820:12731)
392		H1-18-0032-1	22 (CC22)	died	no MRSA	0	0	(contig_11 - 33520:33612)	0	0	0	0	0	0	0	0	0	0	0	0	0	0	0	0	0	0	0	0	0	0	0	0	0	0	0	0	0	0	0	0	0	0	0	0	0	0	(contig_3 - 47783:48289)	0	(contig_36 - 11820:12731)
393		H1-17-0297-1	22 (CC22)	died	no MRSA	0	0	(contig_11 - 44718:44810)	0	0	0	0	0	0	0	0	0	0	0	0	0	0	0	0	0	0	0	0	0	0	0	0	0	0	0	0	0	0	0	0	0	0	0	0	0	0	(contig_2 - 276524:277030)	0	(contig_21 - 11546:12457)
394		H5-20-0053-1	22 (CC22)	died	no MRSA	0	0	(contig_12 - 33519:33611)	0	0	0	0	0	0	0	0	0	0	0	0	0	0	0	0	0	0	0	0	0	0	0	0	0	0	0	0	0	0	0	0	0	0	0	0	0	0	0	0	(contig_19 - 41444:42355)
395		H2-18-0639-1	22 (CC22)	died	no MRSA	0	0	(contig_21 - 33519:33611)	0	0	0	0	0	0	0	0	0	0	(contig_34 - 9507:9872)	0	0	0	0	0	0	0	0	0	0	0	0	0	0	0	0	0	0	0	0	0	0	0	0	0	0	0	(contig_1 - 294401:294907)	0	(contig_18 - 38425:39336)
396		H5-20-0331-1	22 (CC22)	survived	no MRSA	0	0	0	0	0	0	0	0	0	0	0	0	0	0	0	0	0	0	0	0	0	0	0	0	0	0	0	0	0	0	0	0	0	0	0	0	0	0	0	0	0	(contig_2 - 184221:184727)	0	(contig_19 - 41470:42381)
397		H3-17-0189-1	22 (CC22)	survived	no MRSA	0	0	(contig_13 - 33519:33611)	0	0	0	0	0	0	0	0	0	0	0	0	0	0	0	0	0	0	0	0	0	0	0	0	0	0	0	0	0	0	0	0	0	0	0	0	0	0	(contig_4 - 99124:99630)	0	(contig_40 - 11460:12371)
398		H4-17-0436-1	22 (CC22)	survived	no MRSA	0	0	(contig_12 - 59779:59871)	0	0	0	0	0	0	0	0	0	0	0	0	0	0	0	0	0	0	0	0	0	0	0	0	0	0	0	0	0	0	0	0	0	0	0	0	0	0	(contig_17 - 47883:48389)	0	(contig_10 - 67001:67912)
399		H4-18-0410-1	22 (CC22)	survived	no MRSA	0	0	0	0	0	0	0	0	0	0	0	0	0	0	0	0	0	0	0	0	0	0	0	0	0	0	0	0	0	0	0	0	0	0	0	0	0	0	0	0	0	(contig_17 - 13374:13880)	0	(contig_15 - 22550:23461)
400		H4-18-0018-1	22 (CC22)	survived	no MRSA	0	0	0	0	0	0	0	0	0	0	0	0	0	0	0	0	0	0	0	0	0	0	0	0	0	0	0	0	0	0	0	0	0	0	0	0	0	0	0	0	0	(contig_7 - 13374:13880)	0	(contig_19 - 22550:23461)
401		H5-20-0308-1	22 (CC22)	survived	no MRSA	0	0	0	0	0	0	0	0	0	0	0	0	0	0	0	0	0	0	0	0	0	0	0	0	0	0	0	0	0	0	0	0	0	0	0	0	0	0	0	0	0	(contig_1 - 294133:294639)	0	(contig_17 - 25264:26175)
402		H5-17-0038-1	22 (CC22)	died	no MRSA	0	0	(contig_10 - 33520:33612)	0	0	0	0	0	0	0	0	0	0	(contig_34 - 15072:15437)	0	0	0	0	0	0	0	0	0	0	0	(contig_45 - 386:706)	0	0	0	0	0	0	0	0	0	0	0	0	0	0	0	(contig_2 - 188781:189287)	0	(contig_22 - 25264:26175)
403		H2-20-0143-1	22 (CC22)	died	no MRSA	0	0	(contig_12 - 44718:44810)	0	0	0	0	0	0	0	0	0	0	0	0	0	0	0	0	0	0	0	0	0	0	0	0	0	0	0	0	0	0	0	0	0	0	0	0	0	0	(contig_1 - 99122:99628)	0	(contig_19 - 41471:42382)
404		H2-18-0112-1	22 (CC22)	survived	no MRSA	0	0	0	0	0	0	0	0	0	0	0	0	0	(contig_28 - 9411:9776)	0	0	0	0	0	0	0	0	0	0	0	0	0	0	0	0	0	0	0	0	0	0	0	0	0	0	0	(contig_1 - 217237:217743)	0	(contig_17 - 13502:14413)
405		H2-17-0286-1	22 (CC22)	survived	no MRSA	0	0	0	0	0	0	0	0	0	0	0	0	0	(contig_2 - 9414:9779)	0	0	0	0	0	0	0	0	0	0	0	0	0	0	0	0	0	0	0	0	0	0	0	0	0	0	0	(contig_3 - 47820:48326)	0	(contig_20 - 25326:26237)
406		H2-18-0441-1	1518	survived	no MRSA	0	0	0	0	0	0	0	0	0	0	0	0	0	0	0	0	0	0	0	0	0	(contig_1 - 285823:287028)	0	0	0	0	0	0	0	0	0	0	0	0	0	0	0	0	0	0	0	0	0	0
407		H4-18-0359-1	2361	survived	MRSA	0	0	0	0	0	0	0	0	0	0	0	0	0	(contig_14 - 11201:11566)	0	0	0	0	0	0	0	0	0	0	0	0	0	0	0	0	(contig_1 - 456427:457092)	0	0	0	0	0	0	0	0	0	0	0	0	0
408		H5-17-0035-1	-	died	no MRSA	(contig_1 - 633803:634105)	0	(contig_2 - 131052:131144)	0	0	0	0	0	0	0	0	0	(contig_11 - 10419:10838)	0	0	0	0	0	0	0	(contig_1 - 661656:661727)	(contig_1 - 675636:676841)	0	0	0	(contig_2 - 5251:5571)	0	0	0	0	(contig_3 - 455691:456356)	0	0	0	0	0	0	0	0	0	0	0	0	0
409		H1-18-0096-1	182	survived	no MRSA	0	0	(contig_1 - 447654:447746)	0	0	0	0	0	0	0	0	0	(contig_9 - 10457:10876)	0	0	0	0	0	0	0	0	0	0	0	0	(contig_2 - 368160:368480)	0	0	0	0	(contig_1 - 602731:603396)	0	0	0	0	0	0	0	0	0	0	0	0	0
410		H2-18-0599-1	425	survived	no MRSA	0	0	0	0	0	0	0	0	0	0	0	0	0	0	0	0	0	0	0	0	0	0	0	0	0	0	0	0	0	0	(contig_21 - 20262:20927)	0	0	0	0	0	0	0	0	0	0	0	0	0
411		H1-18-0055-1	12(CC121)	survived	no MRSA	(contig_10 - 22370:22672)	0	0	(contig_10 - 61025:61756)	0	0	0	0	0	0	0	0	0	0	0	0	0	0	0	0	(contig_10 - 50220:50291)	0	0	0	0	0	0	0	0	0	(contig_15 - 4057:4722)	0	0	0	0	0	0	0	0	0	0	0	0	0
412		H2-20-0470-1	12(CC121)	died	no MRSA	0	0	0	0	0	0	0	0	0	0	0	0	0	0	0	0	0	0	0	0	(contig_1 - 177262:177333)	0	0	0	0	(contig_27 - 12600:12920)	0	0	0	0	(contig_11 - 71812:72477)	0	0	0	0	0	0	0	0	0	0	0	0	0
413		H2-17-0378-1	718	survived	no MRSA	0	0	0	0	0	0	0	0	0	0	0	0	0	(contig_1 - 381431:381796)	0	0	0	0	0	0	0	0	0	0	0	0	0	0	0	0	(contig_9 - 92990:93655)	0	0	0	0	0	0	0	0	0	0	0	0	0
414		H4-18-0402-1	-	survived	no MRSA	0	0	0	0	0	0	0	0	0	0	0	0	0	0	0	0	0	0	0	0	0	0	0	0	0	0	0	0	0	0	0	0	0	0	0	0	0	0	0	0	0	0	0	0
415		H4-18-0246-1	-	survived	no MRSA	0	0	0	0	0	0	0	0	0	0	0	0	0	0	0	0	0	0	0	0	0	0	0	0	0	0	0	0	0	0	0	0	0	0	0	0	0	0	0	0	0	0	0	0
416		H2-17-0280-1	59	survived	no MRSA	0	0	0	0	0	0	0	0	0	0	0	0	0	0	0	0	0	0	0	0	0	0	0	0	0	0	0	0	0	0	0	0	0	0	0	0	0	0	0	0	0	0	0	0
417		H4-17-0438-1	59	survived	no MRSA	0	0	0	0	0	0	0	0	0	0	0	0	0	0	0	0	0	0	0	0	0	0	0	0	0	0	0	0	0	0	0	0	0	0	0	0	0	0	0	0	0	0	0	0
418		H2-18-0334-1	59	survived	no MRSA	0	0	0	0	0	0	0	0	0	0	0	0	0	0	0	0	0	0	0	0	0	0	0	0	0	0	0	0	0	0	0	0	0	0	0	0	0	0	0	0	0	0	0	0
419		H2-17-0570-1	59	died	no MRSA	0	0	0	0	0	0	0	0	0	0	0	0	0	0	0	0	0	0	0	0	0	0	0	0	(contig_21 - 22923:23540)	0	0	0	0	0	0	0	0	0	0	0	0	0	0	0	0	0	0	0
420		H2-17-0363-1	59	survived	no MRSA	0	0	0	0	0	0	0	0	0	0	0	0	0	0	0	0	0	0	0	0	0	0	0	0	(contig_33 - 21791:22408)	0	0	0	0	0	0	0	0	0	0	0	0	0	0	0	0	0	0	0
421		H5-20-0432-1	59	survived	no MRSA	0	0	0	0	0	0	0	0	0	0	0	0	0	0	0	0	0	0	0	0	0	0	0	0	0	0	0	0	0	0	0	0	0	0	0	0	0	0	0	0	0	0	0	0
422		H5-20-0396-1	59	survived	no MRSA	0	0	0	0	0	0	0	0	0	0	0	0	0	0	0	0	0	0	0	0	0	0	0	0	0	0	0	0	0	0	0	0	0	0	0	0	0	0	0	0	0	0	0	0
423		H5-17-0254-1	59	survived	no MRSA	0	0	0	0	0	0	0	0	0	0	0	0	0	0	0	0	0	0	0	0	0	0	0	0	0	0	0	0	0	0	0	0	0	0	0	0	0	0	0	0	0	0	0	0
424		H5-18-0082-1	10	died	no MRSA	(contig_1 - 220329:220631)	0	0	0	0	0	0	0	0	0	0	0	0	0	0	0	0	0	0	0	(contig_1 - 248179:248250)	0	0	0	0	(contig_6 - 157114:157434)	0	0	0	0	0	0	0	0	0	0	0	0	0	0	0	0	0	0
425		H2-19-0005-1	10	survived	no MRSA	0	0	0	0	0	0	0	0	0	0	0	0	0	(contig_11 - 46153:46518)	0	0	0	0	0	0	0	0	0	0	0	0	0	0	0	0	0	0	0	0	0	0	0	0	0	0	0	0	0	0
426		H2-18-0656-1	1027	survived	no MRSA	0	0	0	0	0	0	0	0	0	0	0	0	0	0	0	0	0	0	0	0	0	0	0	0	0	0	0	0	0	0	0	0	0	0	0	0	0	0	0	0	0	0	0	0
427		H4-18-0213-1	1027	survived	no MRSA	0	0	0	0	0	0	0	0	0	0	0	0	0	0	0	0	0	0	0	0	0	0	0	0	0	0	0	0	0	0	0	0	0	0	0	0	0	0	0	0	0	0	0	0
428		H4-17-0294-1	1027	survived	no MRSA	0	0	0	0	0	0	0	0	0	0	0	0	0	0	0	0	0	0	0	0	0	0	0	0	0	0	0	0	0	0	0	0	0	0	0	0	0	0	0	0	0	0	0	0
429		H4-18-0299-1	395	survived	no MRSA	0	0	0	0	0	0	0	0	0	0	0	0	0	0	0	0	0	0	0	0	0	0	0	0	0	0	0	0	0	0	0	0	0	0	0	0	0	0	0	0	0	0	0	0
430		H1-18-0577-1	395	survived	no MRSA	0	0	0	0	0	0	0	0	0	0	0	0	0	0	0	0	0	0	0	0	0	0	0	0	0	0	0	0	0	0	0	0	0	0	0	0	0	0	0	0	0	0	0	0
431		H2-20-0512-1	45 (CC45)	survived	no MRSA	0	0	0	0	0	0	0	0	0	0	0	0	0	0	0	0	0	0	0	0	0	0	0	0	0	0	0	0	0	0	0	0	0	0	0	0	0	0	0	0	0	0	0	0
432		H2-17-0638-1	2748	survived	no MRSA	0	0	0	0	0	0	0	0	0	0	0	0	0	0	0	0	0	0	0	0	0	0	0	0	0	0	0	0	0	0	0	0	0	0	0	0	0	0	0	0	0	0	0	0
433		H3-17-0252-1	45 (CC45)	survived	no MRSA	0	0	0	0	0	0	0	0	0	0	0	0	0	0	0	0	0	0	0	0	0	0	0	0	0	0	0	0	0	0	0	0	0	0	0	0	0	0	0	0	0	0	0	0
434		H3-17-0203-1	-	survived	no MRSA	0	0	0	0	0	0	0	0	0	0	0	0	0	0	0	0	0	0	0	0	0	0	0	0	0	0	0	0	0	0	0	0	0	0	0	0	0	0	0	0	0	0	0	0
435		H2-18-0547-1	45 (CC45)	died	no MRSA	0	0	0	0	0	0	0	0	0	0	0	0	0	(contig_1 - 761320:761685)	0	0	0	0	0	0	0	0	0	0	0	0	0	0	0	0	0	0	0	0	0	0	0	0	0	0	0	0	0	0
436		H5-17-0193-1	45 (CC45)	survived	no MRSA	0	0	0	0	0	0	0	0	0	0	0	0	0	0	0	0	0	0	0	0	0	0	0	0	0	0	0	0	0	0	0	0	0	0	0	0	0	0	0	0	0	0	0	0
437		H1-18-0192-1	45 (CC45)	survived	no MRSA	0	0	0	0	0	0	0	0	0	0	0	0	0	0	0	0	0	0	0	0	0	0	0	0	0	0	0	0	0	0	0	0	0	0	0	0	0	0	0	0	0	0	0	0
438		H5-17-0271-1	45 (CC45)	survived	no MRSA	0	0	0	0	0	0	0	0	0	0	0	0	0	0	0	0	0	0	0	0	0	0	0	0	0	0	0	0	0	0	0	0	0	0	0	0	0	0	0	0	0	0	0	0
439		H2-20-0519-1	45 (CC45)	survived	no MRSA	0	0	0	0	0	0	0	0	0	0	0	0	0	0	0	0	0	0	0	0	0	0	0	0	0	0	0	0	0	0	0	0	0	0	0	0	0	0	0	0	0	0	0	0
440		H5-18-0330-1	45 (CC45)	died	no MRSA	0	0	0	0	0	0	0	0	0	0	0	0	0	0	0	0	0	0	0	0	0	0	0	0	0	0	0	0	0	0	0	0	0	0	0	0	0	0	0	0	0	0	0	0
441		H4-18-0423-1	45 (CC45)	survived	no MRSA	0	0	0	0	0	0	0	0	0	0	0	0	0	0	0	0	0	0	0	0	0	0	0	0	0	0	0	0	0	0	0	0	0	0	0	0	0	0	0	0	0	0	0	0
442		H4-18-0153-1	45 (CC45)	survived	no MRSA	0	0	0	0	0	0	0	0	0	0	0	0	0	0	0	0	0	0	0	0	0	0	0	0	0	0	0	0	0	0	0	0	0	0	0	0	0	0	0	0	0	0	0	0
443		H2-18-0416-1	45 (CC45)	survived	no MRSA	0	0	0	0	0	0	0	0	0	0	0	0	0	0	0	0	0	0	0	0	0	0	0	0	0	0	0	0	0	0	0	0	0	0	0	0	0	0	0	0	0	0	0	0
444		H4-18-0178-1	45 (CC45)	survived	no MRSA	0	0	0	0	0	0	0	0	0	0	0	0	0	0	0	0	0	0	0	0	0	0	0	0	0	0	0	0	0	0	0	0	0	0	0	0	0	0	0	0	0	0	0	0
445		H2-18-0269-1	45 (CC45)	died	no MRSA	0	0	0	0	0	0	0	0	0	0	0	0	0	0	0	0	0	0	0	0	0	0	0	0	0	0	0	0	0	0	0	0	0	0	0	0	0	0	0	0	0	0	0	0
446		H1-17-0308-1	-	survived	no MRSA	0	0	0	0	0	0	0	0	0	0	0	0	0	0	0	0	0	0	0	0	0	0	0	0	0	0	0	0	0	0	0	0	0	0	0	0	0	0	0	0	0	0	0	0
447		H2-20-0226-1	45 (CC45)	died	no MRSA	0	0	0	0	0	0	0	0	0	0	0	0	0	0	0	0	0	0	0	0	0	0	0	0	0	0	0	0	0	0	0	0	0	0	0	0	0	0	0	0	0	0	0	0
448		H2-17-0625-1	45 (CC45)	survived	no MRSA	0	0	0	0	0	0	0	0	0	0	0	0	0	0	0	0	0	0	0	0	0	0	0	0	0	0	0	0	0	0	0	0	0	0	0	0	0	0	0	0	0	0	0	0
449		H2-18-0177-1	45 (CC45)	survived	no MRSA	0	0	0	0	0	0	0	0	0	0	0	0	0	0	0	0	0	0	0	0	0	0	0	0	0	0	0	0	0	0	0	0	0	0	0	0	0	0	0	0	0	0	0	0
450		H4-18-0199-1	45 (CC45)	survived	no MRSA	0	0	0	0	0	0	0	0	0	0	0	0	0	0	0	0	0	(contig_15 - 1350:1691)	0	0	0	0	0	0	0	(contig_15 - 12532:12852)	0	0	0	0	0	0	0	0	0	0	0	0	0	0	0	0	0	0
451		H2-18-0062-1	45 (CC45)	survived	no MRSA	0	0	0	0	0	0	0	0	0	0	0	0	0	0	0	0	0	(contig_1 - 927417:927758)	0	0	0	0	0	0	0	(contig_1 - 916256:916576)	0	0	0	0	0	0	0	0	0	0	0	0	0	0	0	0	0	0
452		H2-18-0178-1	45 (CC45)	survived	no MRSA	0	0	0	0	0	0	0	0	0	0	0	0	0	0	0	0	0	0	0	0	0	0	0	0	0	0	0	0	0	0	0	0	0	0	0	0	0	0	0	0	0	0	0	0
453		H1-18-0168-1	45 (CC45)	survived	no MRSA	0	0	0	0	0	0	0	0	0	0	0	0	0	0	0	0	0	0	0	0	0	0	0	0	0	0	0	0	0	0	0	0	0	0	0	0	0	0	0	0	0	0	0	0
454		H4-18-0428-1	45 (CC45)	survived	no MRSA	0	0	0	0	0	0	0	0	0	0	0	0	0	0	0	0	0	0	0	0	0	0	0	0	0	0	0	0	0	0	0	0	0	0	0	0	0	0	0	0	0	0	0	0
455		H2-18-0246-1	-	survived	no MRSA	0	0	0	0	0	0	0	0	0	0	0	0	0	0	0	0	0	0	0	0	0	0	0	0	0	0	0	0	0	0	0	0	0	0	0	0	0	0	0	0	0	0	0	0
456		H2-17-0358-1	45 (CC45)	survived	no MRSA	0	0	0	0	0	0	0	0	0	0	0	0	0	0	0	0	0	0	0	0	0	0	0	0	0	0	0	0	0	0	0	0	0	0	0	0	0	0	0	0	0	0	0	0
457		H5-19-0403-1	45 (CC45)	died	no MRSA	0	0	0	0	0	0	0	0	0	0	0	0	0	0	0	0	0	0	0	0	0	0	0	0	0	0	0	0	0	0	0	0	0	0	0	0	0	0	0	0	0	0	0	0
458		H2-17-0190-1	45 (CC45)	survived	no MRSA	0	0	0	(contig_4 - 301968:302699)	0	0	0	0	0	0	0	0	0	0	0	0	0	0	0	0	0	(contig_4 - 299591:300796)	0	0	0	0	0	0	0	0	0	0	0	0	0	0	0	0	0	0	0	0	0	0
459		H4-17-0207-1	45 (CC45)	survived	no MRSA	0	0	0	0	0	0	0	0	0	0	0	0	0	0	0	0	0	0	0	0	0	0	0	0	0	0	0	0	0	0	0	0	0	0	0	0	0	0	0	0	0	0	0	0
460		H2-19-0037-1	45 (CC45)	survived	no MRSA	0	0	0	0	0	0	0	0	0	0	0	0	0	0	0	0	0	0	0	0	0	0	0	0	0	0	0	0	0	0	0	0	0	0	0	0	0	0	0	0	0	0	0	0
461		H4-18-0170-1	45 (CC45)	survived	no MRSA	0	0	0	0	0	0	0	0	0	0	0	0	0	0	0	0	0	(contig_1 - 554198:554539)	0	0	0	0	0	0	0	(contig_1 - 543037:543357)	0	0	0	0	0	0	0	0	0	0	0	0	0	0	0	0	0	0
462		H2-18-0144-1	45 (CC45)	survived	no MRSA	0	0	0	0	0	0	0	0	0	0	0	0	0	0	0	0	0	0	0	0	0	0	0	0	0	0	0	0	0	0	0	0	0	0	0	0	0	0	0	0	0	0	0	0
463		H2-20-0173-1	45 (CC45)	survived	no MRSA	0	0	0	0	0	0	0	0	0	0	0	0	0	0	0	0	0	0	0	0	0	0	0	0	0	0	0	0	0	0	0	0	0	0	0	0	0	0	0	0	0	0	0	0
464		H2-19-0014-1	5163	survived	no MRSA	0	0	0	0	0	0	0	0	0	0	0	0	0	0	0	(contig_1 - 898801:900615)	0	0	0	0	0	0	0	0	0	0	0	0	0	0	0	0	0	0	0	0	0	0	0	0	0	0	0	0
465		H4-18-0123-1	-	survived	no MRSA	0	0	0	0	0	0	0	0	0	0	0	0	0	0	0	0	0	0	0	0	0	0	0	0	0	0	0	0	0	0	0	0	0	0	0	0	0	0	0	0	0	0	0	0
466		H2-18-0089-1	45 (CC45)	survived	no MRSA	0	0	0	0	0	0	0	0	0	0	0	0	0	0	0	0	0	0	0	0	0	0	0	0	0	0	0	0	0	0	0	0	0	0	0	0	0	0	0	0	0	0	0	0
467		H4-17-0369-1	45 (CC45)	survived	no MRSA	0	0	0	0	0	0	0	0	0	0	0	0	0	(contig_2 - 228087:228452)	0	0	0	0	0	0	0	0	0	0	0	0	0	0	0	0	0	0	0	0	0	0	0	0	0	0	0	0	0	0
468		H4-17-0102-1	45 (CC45)	survived	no MRSA	0	0	0	0	0	0	0	0	0	0	0	0	0	0	0	0	0	0	0	0	0	0	0	0	0	0	0	0	0	0	0	0	0	0	0	0	0	0	0	0	0	0	0	0
469		H5-18-0097-1	45 (CC45)	died	no MRSA	0	0	0	0	0	0	0	0	0	0	0	0	0	0	0	0	0	0	0	0	0	0	0	0	0	0	0	0	0	0	0	0	0	0	0	0	0	0	0	0	0	0	0	0
470		H1-17-0445-1	45 (CC45)	survived	no MRSA	0	0	0	0	0	0	0	0	0	0	0	0	0	0	0	0	0	0	0	0	0	0	0	0	0	0	0	0	0	0	0	0	0	0	0	0	0	0	0	0	0	0	0	0
471		H4-18-0498-1	45 (CC45)	survived	no MRSA	0	0	0	0	0	0	0	0	0	0	0	0	0	0	0	0	0	0	0	0	0	0	0	0	0	0	0	0	0	0	0	0	0	0	0	0	0	0	0	0	0	0	0	0
472		H2-18-0627-1	45 (CC45)	survived	no MRSA	0	0	0	0	0	0	0	0	0	0	0	0	0	0	0	0	0	0	0	0	(contig_13 - 2525:2596)	0	0	0	0	0	0	0	0	0	0	0	0	0	0	0	0	0	0	0	0	0	0	0
473		H2-18-0353-1	45 (CC45)	survived	no MRSA	0	0	0	0	0	0	0	0	0	0	0	0	0	0	0	0	0	0	0	0	0	0	0	0	0	0	0	0	0	0	0	0	0	0	0	0	0	0	0	0	0	0	0	0
474		H4-18-0396-1	45 (CC45)	survived	no MRSA	0	0	0	0	0	0	0	0	0	0	0	0	0	0	0	0	0	0	0	0	0	0	0	0	0	(contig_2 - 44593:44913)	0	0	0	0	0	0	0	0	0	0	0	0	0	0	0	0	0	0
475		H4-18-0368-1	45 (CC45)	survived	no MRSA	0	0	0	0	0	0	0	0	0	0	0	0	0	0	0	0	0	0	0	0	0	0	0	0	0	0	0	0	0	0	0	0	0	0	0	0	0	0	0	0	0	0	0	0
476		H5-19-0382-1	45 (CC45)	survived	no MRSA	0	0	0	0	0	0	0	0	0	0	0	0	0	0	0	0	0	(contig_9 - 3588:3929)	0	0	0	0	0	0	0	(contig_9 - 14770:15090)	0	0	0	0	0	0	0	0	0	0	0	0	0	0	0	0	0	0
477		H1-18-0074-1	45 (CC45)	survived	no MRSA	0	0	0	0	0	0	0	0	0	0	0	0	0	0	0	0	0	(contig_4 - 376902:377243)	0	0	0	0	0	0	0	(contig_4 - 365741:366061)	0	0	0	0	0	0	0	0	0	0	0	0	0	0	0	0	0	0
478		H5-18-0378-1	45 (CC45)	survived	no MRSA	0	0	0	0	0	0	0	0	0	0	0	0	0	0	0	0	0	0	0	0	0	0	0	0	0	0	0	0	0	0	0	0	0	0	0	0	0	0	0	0	0	0	0	0
479		H2-17-0400-1	45 (CC45)	survived	no MRSA	0	0	0	0	0	0	0	0	0	0	0	0	0	0	0	0	0	0	0	0	0	0	0	0	0	0	0	0	0	0	0	0	0	0	0	0	0	0	0	0	0	0	0	0
480		H4-18-0323-1	45 (CC45)	survived	no MRSA	0	0	0	0	0	0	0	0	0	0	0	0	0	0	0	0	0	0	0	0	0	0	0	0	0	0	0	0	0	0	0	0	0	0	0	0	0	0	0	0	0	0	0	0
481		H4-18-0162-1	45 (CC45)	survived	no MRSA	0	0	0	0	0	0	0	0	0	0	0	0	0	0	0	0	0	0	0	0	0	0	0	0	0	0	0	0	0	0	0	0	0	0	0	0	0	0	0	0	0	0	0	0
482		H3-17-0173-1	45 (CC45)	survived	no MRSA	0	0	0	0	0	0	0	0	0	0	0	0	0	0	0	0	0	0	0	0	0	0	0	0	0	0	0	0	0	0	0	0	0	0	0	0	0	0	0	0	0	0	0	0
483		H2-17-0276-1	45 (CC45)	died	no MRSA	0	0	0	0	0	0	0	0	0	0	0	0	0	0	0	0	0	(contig_9 - 42979:43320)	0	0	0	0	0	0	0	(contig_9 - 31818:32138)	0	0	0	0	0	0	0	0	0	0	0	0	0	0	0	0	0	0
484		H1-18-0281-1	45 (CC45)	survived	no MRSA	0	0	0	0	0	0	0	0	0	0	0	0	0	0	0	0	0	0	0	0	0	0	0	0	(contig_12 - 16240:16857)	(contig_1 - 51196:51516)	0	0	0	0	0	0	0	0	0	0	0	0	0	0	0	0	0	0
485		H5-18-0135-1	45 (CC45)	survived	no MRSA	0	0	0	0	0	0	0	0	0	0	0	0	0	0	0	0	0	0	0	0	0	0	0	0	0	0	0	0	0	0	0	0	0	0	0	0	0	0	0	0	0	0	0	0
486		H2-18-0261-1	45 (CC45)	died	no MRSA	0	0	0	0	0	0	0	0	0	0	0	0	0	0	0	0	0	0	0	0	0	0	0	0	0	0	0	0	0	0	0	0	0	0	0	0	0	0	0	0	0	0	0	0
487		H4-17-0363-1	45 (CC45)	survived	no MRSA	0	0	0	0	0	0	0	0	0	0	0	0	0	0	0	0	0	0	0	0	0	0	0	0	0	0	0	0	0	0	0	0	0	0	0	0	0	0	0	0	0	0	0	0
488		H1-18-0021-1	45 (CC45)	survived	no MRSA	0	0	0	0	0	0	0	0	0	0	0	0	0	0	0	0	0	0	0	0	0	0	0	0	(contig_13 - 16219:16836)	0	0	0	0	0	0	0	0	0	0	0	0	0	0	0	0	0	0	0
489		H1-17-0478-1	45 (CC45)	survived	no MRSA	0	0	0	0	0	0	0	0	0	0	0	0	0	0	0	0	0	0	0	0	0	0	0	0	0	0	0	0	0	0	0	0	0	0	0	0	0	0	0	0	0	0	0	0
490		H4-17-0193-1	45 (CC45)	survived	no MRSA	0	0	0	0	0	0	0	0	0	0	0	0	0	0	0	0	0	0	0	0	0	0	0	0	0	0	0	0	0	0	0	0	0	0	0	0	0	0	0	0	0	0	0	0
491		H2-20-0591-1	45 (CC45)	survived	no MRSA	0	0	0	0	0	0	0	0	0	0	0	0	0	0	0	0	0	0	0	0	0	0	0	0	0	0	0	0	0	0	0	0	0	0	0	0	0	0	0	0	0	0	0	0
492		H4-18-0049-1	47	survived	no MRSA	0	0	0	0	(contig_10 - 6229:6840)	(contig_8 - 17943:18722)	(contig_8 - 9471:9650)	(contig_8 - 5452:5640)	(contig_8 - 8068:8838)	(contig_8 - 8942:9343)	(contig_8 - 16723:16890)	(contig_8 - 17047:17853)	(contig_10 - 7193:7612)	0	0	0	0	0	(contig_8 - 3760:3900)	0	0	0	0	0	(contig_8 - 4448:5065)	0	0	0	0	0	0	0	0	0	0	0	0	0	0	0	0	0	0	0
493		H2-18-0203-1	47	survived	no MRSA	0	0	0	0	0	0	0	0	0	0	0	0	0	0	0	0	0	0	0	0	0	0	0	0	0	0	0	0	0	0	0	0	0	0	0	0	0	0	0	0	0	0	0	0
494		H2-20-0714-1	45 (CC45)	died	no MRSA	0	0	0	0	0	0	0	0	0	0	0	0	0	0	0	0	0	0	0	0	0	0	0	0	0	(contig_1 - 717084:717404)	0	0	0	0	0	0	0	0	0	0	0	0	0	0	0	0	0	0
495		H1-17-0470-1	45 (CC45)	died	no MRSA	0	0	0	0	0	0	0	0	0	0	0	0	0	0	0	0	0	0	0	0	0	0	0	0	0	0	0	0	0	0	0	0	0	0	0	0	0	0	0	0	0	0	0	0
496		H2-20-0410-1	45 (CC45)	survived	no MRSA	0	0	0	0	0	0	0	0	0	0	0	0	0	0	0	0	0	(contig_2 - 281433:281774)	0	0	0	0	0	0	0	(contig_2 - 270275:270595)	0	0	0	0	0	0	0	0	0	0	0	0	0	0	0	0	0	0
497		H2-18-0540-1	45 (CC45)	survived	no MRSA	0	0	0	0	0	0	0	0	0	0	0	0	0	0	0	0	0	0	0	0	0	0	0	0	0	0	0	0	0	0	0	0	0	0	0	0	0	0	0	0	0	0	0	0
498		H2-17-0459-1	45 (CC45)	survived	no MRSA	0	0	0	0	0	0	0	0	0	0	0	0	0	0	0	0	0	0	0	0	0	0	0	0	0	0	0	0	0	0	0	0	0	0	0	0	0	0	0	0	0	0	0	0
499		H5-18-0198-1	45 (CC45)	survived	no MRSA	0	0	0	0	0	0	0	0	0	0	0	0	0	0	0	0	0	0	0	0	0	0	0	0	(contig_11 - 11319:11936)	0	0	0	0	0	0	0	0	0	0	0	0	0	0	0	0	0	0	0
500		H5-17-0221-1	-	survived	no MRSA	0	0	0	0	0	0	0	0	0	0	0	0	0	0	0	0	0	0	0	0	0	0	0	0	0	0	0	0	0	0	0	0	0	0	0	0	0	0	0	0	0	0	0	0
501		H2-20-0097-1	-	survived	no MRSA	0	0	0	0	0	0	0	0	0	0	0	0	0	0	0	0	0	0	0	0	0	0	0	0	0	0	0	0	0	0	0	0	0	0	0	0	0	0	0	0	0	0	0	0
502		H4-17-0412-1	-	survived	no MRSA	0	0	0	0	0	0	0	0	0	0	0	0	0	0	0	0	0	0	0	0	0	0	0	0	0	0	0	0	0	0	0	0	0	0	0	0	0	0	0	0	0	0	0	0
503		H2-17-0404-1	45 (CC45)	survived	MRSA	0	0	0	0	0	0	0	0	0	0	0	0	0	0	0	0	0	0	0	0	0	0	0	0	0	0	0	0	0	0	0	0	0	0	0	0	0	0	0	0	0	0	0	0
504		H2-17-0395-1	45 (CC45)	survived	MRSA	0	0	0	0	0	0	0	0	0	0	0	0	0	0	0	0	0	0	(contig_18 - 1262:1402)	0	0	0	0	0	(contig_18 - 97:714)	0	0	0	0	0	0	0	0	0	0	0	0	0	0	0	0	0	0	0
505		H4-18-0175-1	45 (CC45)	died	MRSA	0	0	0	0	0	0	0	0	0	0	0	0	0	0	0	0	0	0	0	0	0	0	0	0	0	0	0	0	0	0	0	0	0	0	0	0	0	0	0	0	0	0	0	0
506		H4-17-0315-1	46	survived	no MRSA	0	0	0	0	0	0	0	0	0	0	0	0	0	0	0	0	0	0	0	0	0	0	0	0	0	0	0	0	0	0	0	0	0	0	0	0	0	0	0	0	0	0	0	0
507		H2-17-0576-1	46	survived	no MRSA	0	0	0	0	0	0	0	0	0	0	0	0	0	0	0	0	0	0	0	0	0	0	0	0	0	0	0	0	0	0	0	0	0	0	0	0	0	0	0	0	0	0	0	0
508		H2-18-0480-1	45 (CC45)	died	no MRSA	0	0	0	0	0	0	0	0	0	0	0	0	0	0	0	0	0	0	0	0	0	0	0	0	0	0	0	0	0	0	0	0	0	0	0	0	0	0	0	0	0	0	0	0
509		H5-18-0020-1	-	survived	no MRSA	0	0	0	0	0	0	0	0	0	0	0	0	0	0	0	0	0	0	0	0	0	0	0	0	0	0	0	0	0	0	0	0	0	0	0	0	0	0	0	0	0	0	0	0
510		H2-17-0364-1	-	survived	no MRSA	0	0	0	0	0	0	0	0	0	0	0	0	0	0	0	0	0	0	0	0	0	0	0	0	0	0	0	0	0	0	0	0	0	0	0	0	0	0	0	0	0	0	0	0
511		H1-18-0284-1	45 (CC45)	survived	no MRSA	0	0	0	0	0	0	0	0	0	0	0	0	0	0	0	0	0	0	0	0	0	0	0	0	0	0	0	0	0	0	0	0	0	0	0	0	0	0	0	0	0	0	0	0
512		H2-17-0476-1	45 (CC45)	died	no MRSA	0	0	0	0	0	0	0	0	0	0	0	0	0	0	0	0	0	0	0	0	0	0	0	0	0	0	0	0	0	0	0	0	0	0	0	0	0	0	0	0	0	0	0	0
513		H2-20-0604-1	-	survived	no MRSA	0	0	0	0	0	0	0	0	0	0	0	0	0	(contig_4 - 244526:244891)	0	0	0	0	0	0	0	0	0	0	(contig_12 - 2344:2961)	0	0	0	0	0	0	0	0	0	0	0	0	0	0	0	0	0	0	0
514		H4-18-0047-1	45 (CC45)	survived	no MRSA	0	0	0	0	0	0	0	0	0	0	0	0	0	0	0	0	0	0	0	0	0	0	0	0	0	0	0	0	0	0	0	0	0	0	0	0	0	0	0	0	0	0	0	0
515		H4-18-0038-1	45 (CC45)	died	no MRSA	0	0	0	0	0	0	0	0	0	0	0	0	0	0	0	0	0	0	0	0	0	0	0	0	0	0	0	0	0	0	0	0	0	0	0	0	0	0	0	0	0	0	0	0
516		H4-18-0125-1	45 (CC45)	survived	no MRSA	0	0	0	0	0	0	0	0	0	0	0	0	0	(contig_4 - 267850:268215)	0	0	0	0	0	0	0	0	0	0	(contig_11 - 21767:22384)	0	0	0	0	0	0	0	0	0	0	0	0	0	0	0	0	0	0	0
517		H2-17-0265-1	45 (CC45)	survived	no MRSA	0	0	0	0	0	0	0	0	0	0	0	0	0	0	0	0	0	0	0	0	0	0	0	0	(contig_11 - 4248:4865)	0	0	0	0	0	0	0	0	0	0	0	0	0	0	0	0	0	0	0
518		H5-19-0406-1	45 (CC45)	survived	no MRSA	0	0	0	0	0	0	0	0	0	0	0	0	0	0	0	0	0	0	0	0	0	0	0	0	0	0	0	0	0	0	0	0	0	0	0	0	0	0	0	0	0	0	0	0
519		H4-18-0389-1	256	died	no MRSA	0	0	0	0	0	0	0	0	0	0	0	0	0	0	0	0	0	0	0	0	0	0	0	0	0	0	0	0	0	0	0	0	0	0	0	0	0	0	0	0	0	0	0	0
520		H4-18-0253-1	-	survived	no MRSA	0	0	0	0	0	0	0	0	0	0	0	0	0	(contig_7 - 95785:96150)	0	0	0	0	0	0	0	0	0	0	(contig_14 - 81:698)	(contig_16 - 488:808)	0	0	0	0	0	0	0	0	0	0	0	0	0	0	0	0	0	0
521		H4-18-0015-1	-	died	no MRSA	0	0	0	0	0	0	0	0	0	0	0	0	0	(contig_11 - 9713:10078)	0	0	0	0	0	0	0	0	0	0	(contig_12 - 81:698)	0	0	0	0	0	0	0	0	0	0	0	0	0	0	0	0	0	0	0
522		H5-19-0346-1	45 (CC45)	survived	no MRSA	0	0	0	0	0	0	0	0	0	0	0	0	0	0	0	0	0	0	0	0	0	0	0	0	0	0	0	0	0	0	0	0	0	0	0	0	0	0	0	0	0	0	0	0
523		H1-18-0149-1	45 (CC45)	died	no MRSA	0	0	0	0	0	0	0	0	0	0	0	0	0	0	0	0	0	0	0	0	0	0	0	0	(contig_9 - 72:689)	0	0	0	0	0	0	0	0	0	0	0	0	0	0	0	0	0	0	0
524		H1-18-0059-1	45 (CC45)	survived	no MRSA	0	0	0	0	0	0	0	0	0	0	0	0	0	0	0	0	0	0	0	0	0	0	0	0	0	0	0	0	0	0	0	0	0	0	0	0	0	0	0	0	0	0	0	0
525		H1-18-0418-1	45 (CC45)	survived	no MRSA	0	0	0	0	0	0	0	0	0	0	0	0	0	0	0	0	0	0	0	0	0	0	0	0	0	0	0	0	0	0	0	0	0	0	0	0	0	0	0	0	0	0	0	0
526		H5-18-0167-1	45 (CC45)	survived	no MRSA	0	0	0	0	0	0	0	0	0	0	0	0	0	(contig_5 - 94988:95353)	0	0	0	0	0	0	0	0	0	0	0	0	0	0	0	0	0	0	0	0	0	0	0	0	0	0	0	0	0	0
527		H2-20-0499-1	45 (CC45)	died	no MRSA	0	0	0	0	0	0	0	0	0	0	0	0	0	0	0	0	0	0	0	0	0	0	0	0	0	0	0	0	0	0	0	0	0	0	0	0	0	0	0	0	0	0	0	0
528		H4-18-0077-1	6289	survived	no MRSA	0	0	0	0	0	0	0	0	0	0	0	0	0	0	0	0	0	0	0	0	0	0	0	0	0	0	0	0	0	0	0	0	0	0	0	0	0	0	0	0	0	0	0	0
529		H2-20-0297-1	45 (CC45)	died	no MRSA	0	0	0	0	0	0	0	0	0	0	0	0	0	0	0	0	0	0	0	0	0	0	0	0	(contig_10 - 7609:8226)	0	0	0	0	0	0	0	0	0	0	0	0	0	0	0	0	0	0	0
530		H5-18-0192-1	291	survived	no MRSA	0	0	0	0	0	0	0	0	0	0	0	0	0	0	0	0	0	0	0	0	0	0	0	0	0	0	0	0	0	0	0	0	0	0	0	0	0	0	0	0	0	0	0	0
531		H4-17-0430-1	291	survived	no MRSA	0	0	0	0	0	0	0	0	0	0	0	0	0	0	0	0	0	0	0	0	0	0	0	0	0	0	0	0	0	0	0	0	0	0	0	0	0	0	0	0	0	0	0	0
532		H4-18-0289-1	291	survived	no MRSA	0	0	0	0	0	0	0	0	0	0	0	0	0	0	0	0	0	0	0	0	0	0	0	0	0	0	0	0	0	0	0	0	0	0	0	0	0	0	0	0	0	0	0	0
533		H2-20-0129-1	291	survived	no MRSA	0	0	0	0	0	0	0	0	0	0	0	0	0	0	0	0	0	0	0	0	0	0	0	0	0	0	0	0	0	0	0	0	0	0	0	0	0	0	0	0	0	0	0	0
534		H2-20-0339-1	-	died	no MRSA	0	0	0	0	0	0	0	0	0	0	0	0	0	0	0	0	0	0	0	0	0	0	0	0	0	0	0	0	0	0	0	0	0	0	0	0	0	0	0	0	0	0	0	0
535		H5-17-0125-1	398	survived	no MRSA	0	0	0	0	0	0	0	0	0	0	0	0	0	0	0	0	0	0	0	0	0	0	0	0	0	0	0	0	0	0	0	0	0	0	0	0	0	0	0	0	0	0	0	0
536		H2-18-0292-1	398	survived	no MRSA	0	0	0	0	0	0	0	0	0	0	0	0	0	0	0	0	0	0	0	0	0	0	0	0	0	0	0	0	0	0	0	0	0	0	0	0	0	0	0	0	0	0	0	0
537		H2-18-0648-1	398	survived	no MRSA	0	0	0	0	0	0	0	0	0	0	0	0	0	0	0	0	0	0	0	0	0	0	0	0	0	0	0	0	0	0	0	0	0	0	0	0	0	0	0	0	0	0	0	0
538		H2-18-0700-1	398	survived	no MRSA	0	0	0	0	0	0	0	0	0	0	0	0	0	0	0	0	0	0	0	0	0	(contig_3 - 325082:326287)	0	0	0	0	0	0	0	0	0	0	0	0	0	0	0	0	0	0	0	0	0	0
539		H5-17-0096-1	398	survived	no MRSA	0	0	0	0	0	0	0	0	0	0	0	0	0	0	0	0	0	0	0	0	0	0	0	0	0	0	0	0	0	0	0	0	0	0	0	0	0	0	0	0	0	0	0	0
540		H5-20-0164-1	398	survived	no MRSA	0	0	0	0	0	0	0	0	0	0	0	0	0	0	0	0	0	0	0	0	0	0	0	0	0	0	0	0	0	0	0	0	0	0	0	0	0	0	0	0	0	0	0	0
541		H5-17-0170-1	398	survived	no MRSA	0	0	0	0	0	0	0	0	0	0	0	0	0	0	0	0	0	0	0	0	0	0	0	0	0	0	0	0	0	0	0	0	0	0	0	0	0	0	0	0	0	0	0	0
542		H5-17-0077-1	398	survived	no MRSA	0	0	0	0	0	0	0	0	0	0	0	0	0	0	0	0	0	(contig_1 - 545656:545997)	0	0	0	0	0	0	0	(contig_1 - 534495:534815)	0	0	0	0	0	0	0	0	0	0	0	0	0	0	0	0	0	0
543		H2-18-0446-1	398	survived	no MRSA	0	0	0	0	0	0	0	0	0	0	0	0	0	0	0	0	0	0	0	0	0	0	0	0	0	0	0	0	0	0	0	0	0	0	0	0	0	0	0	0	0	0	0	0
544		H2-20-0578-1	398	survived	no MRSA	0	0	0	0	0	0	0	0	0	0	0	0	0	0	0	0	0	0	0	0	0	0	0	0	0	0	0	0	0	0	0	0	0	0	0	0	0	0	0	0	0	0	0	0
545		H2-20-0115-1	398	survived	no MRSA	0	0	0	0	0	0	0	0	0	0	0	0	0	0	0	0	0	0	0	0	0	0	0	0	0	0	0	0	0	0	0	0	0	0	0	0	0	0	0	0	0	0	0	0
546		H4-18-0159-1	398	survived	no MRSA	0	0	0	0	0	0	0	0	0	0	0	0	0	0	0	0	0	0	0	0	0	0	0	0	0	0	0	0	0	0	0	0	0	0	0	0	0	0	0	0	0	0	0	0
547		H4-17-0269-1	398	died	no MRSA	0	0	0	0	0	0	0	0	0	0	0	0	0	0	0	0	0	0	0	0	0	0	0	0	0	0	0	0	0	0	0	0	0	0	0	0	0	0	0	0	0	0	0	0
548		H2-18-0435-1	398	survived	no MRSA	0	0	0	0	0	0	0	0	0	0	0	0	0	0	0	0	0	0	0	0	0	0	0	0	0	0	0	0	0	0	0	0	0	0	0	0	0	0	0	0	0	0	0	0
549		H2-18-0733-1	398	survived	no MRSA	0	0	0	0	0	0	0	0	0	0	0	0	0	0	0	0	0	0	0	0	0	0	0	0	0	0	0	0	0	0	0	0	0	0	0	0	0	0	0	0	0	0	0	0
550		H4-18-0137-1	398	survived	no MRSA	0	0	0	0	0	0	0	0	0	0	0	0	0	0	0	0	0	0	0	0	0	0	0	0	0	0	0	0	0	0	0	0	0	0	0	0	0	0	0	0	0	0	0	0
551		H2-17-0412-1	398	survived	no MRSA	0	0	0	0	0	0	0	0	0	0	0	0	0	0	0	0	0	0	0	0	0	0	0	0	0	0	0	0	0	0	0	0	0	0	0	0	0	0	0	0	0	0	0	0
552		H5-20-0297-1	398	survived	no MRSA	0	0	0	0	0	0	0	0	0	0	0	0	0	0	0	0	0	0	0	0	0	0	0	0	0	0	0	0	0	0	0	0	0	0	0	0	0	0	0	0	0	0	0	0
553		H2-17-0531-1	398	died	no MRSA	0	0	0	0	0	0	0	0	0	0	0	0	0	0	0	0	0	0	0	0	0	0	0	0	0	0	0	0	0	0	0	0	0	0	0	0	0	0	0	0	0	0	0	0
554		H2-20-0563-1	398	survived	no MRSA	0	0	0	0	0	0	0	0	0	0	0	0	0	0	0	0	0	0	0	0	0	0	0	0	0	0	0	0	0	0	0	0	0	0	0	0	0	0	0	0	0	0	0	0
555		H2-17-0456-1	398	survived	no MRSA	0	0	0	0	0	0	0	0	0	0	0	0	0	0	0	0	0	0	0	0	0	0	0	0	0	0	0	0	0	0	0	0	0	0	0	0	0	0	0	0	0	0	0	0
556		H2-18-0458-1	398	died	no MRSA	0	0	0	0	0	0	0	0	0	0	0	0	0	0	0	0	0	0	0	0	0	0	0	0	0	0	0	0	0	0	0	0	0	0	0	0	0	0	0	0	0	0	0	0
557		H2-18-0450-1	398	survived	no MRSA	0	0	0	0	0	0	0	0	0	0	0	0	0	0	0	0	0	0	0	0	0	0	0	0	0	0	0	0	0	0	0	0	0	0	0	0	0	0	0	0	0	0	0	0
558		H2-18-0556-1	398	survived	no MRSA	0	0	0	0	0	0	0	0	0	0	0	0	0	0	0	0	0	0	0	0	0	0	0	0	0	0	0	0	0	0	0	0	0	0	0	0	0	0	0	0	0	0	0	0
559		H2-17-0485-1	398	died	no MRSA	0	0	0	0	0	0	0	0	0	0	0	0	0	0	0	0	0	0	0	0	(contig_3 - 269356:269427)	(contig_2 - 10210:11415)	0	0	0	0	0	0	0	0	0	0	0	0	0	0	0	0	0	0	0	0	0	0
560		H2-20-0395-1	398	survived	no MRSA	0	0	0	0	0	0	0	0	0	0	0	0	0	0	0	0	0	0	0	0	0	0	0	0	0	0	0	0	0	0	0	0	0	0	0	0	0	0	0	0	0	0	0	0
561		H2-18-0029-1	398	survived	no MRSA	0	0	0	0	0	0	0	0	0	0	0	0	0	0	0	0	0	0	0	0	0	0	0	0	0	0	0	0	0	0	0	0	0	0	0	0	0	0	0	0	0	0	0	0
562		H2-20-0087-1	398	survived	no MRSA	0	0	0	0	0	0	0	0	0	0	0	0	0	0	0	0	0	0	0	0	0	0	0	0	0	0	0	0	0	0	0	0	0	0	0	0	0	0	0	0	0	0	0	0
563		H2-20-0445-1	398	died	no MRSA	0	0	0	0	0	0	0	0	0	0	0	0	0	(contig_2 - 10441:10806)	0	0	0	0	0	0	0	0	0	0	0	0	0	0	0	0	0	0	0	0	0	0	0	0	0	0	0	0	0	0
564		H2-20-0083-1	398	survived	no MRSA	0	0	0	0	0	0	0	0	0	0	0	0	0	0	0	0	0	0	0	0	0	0	0	0	0	0	0	0	0	0	0	0	0	0	0	0	0	0	0	0	0	0	0	0
565		H4-17-0401-1	398	survived	no MRSA	0	0	0	0	0	0	0	0	0	0	0	0	0	0	0	0	0	0	0	0	0	0	0	0	0	0	0	0	0	0	0	0	0	0	0	0	0	0	0	0	0	0	0	0
566		H5-20-0038-1	398	survived	no MRSA	0	0	0	0	0	0	0	0	0	0	0	0	0	0	0	0	0	0	0	0	0	0	0	0	0	0	0	0	0	0	0	0	0	0	0	0	0	0	0	0	0	0	0	0
567		H1-18-0360-1	398	survived	no MRSA	0	0	0	0	0	0	0	0	0	0	0	0	0	0	0	0	0	0	0	0	0	0	0	0	0	0	0	0	0	0	0	0	0	0	0	0	0	0	0	0	0	0	0	0
568		H1-17-0621-1	398	survived	no MRSA	0	0	0	0	0	0	0	0	0	0	0	0	0	0	0	0	0	0	0	0	0	0	0	0	0	0	0	0	0	0	0	0	0	0	0	0	0	0	0	0	0	0	0	0
569		H1-17-0387-1	398	survived	no MRSA	0	0	0	0	0	0	0	0	0	0	0	0	0	0	0	0	0	0	0	0	(contig_4 - 13311:13382)	0	0	0	0	0	0	0	0	0	0	0	0	0	0	0	0	0	0	0	0	0	0	0
570		H2-20-0327-1	398	survived	no MRSA	0	0	0	0	0	0	0	0	0	0	0	0	0	0	0	0	0	0	0	0	0	0	0	0	0	0	0	0	0	0	0	0	0	0	0	0	0	0	0	0	0	0	0	0
571		H4-17-0071-1	34	died	no MRSA	0	0	0	0	0	0	0	0	0	0	0	0	0	0	0	0	0	0	0	0	(contig_1 - 126655:126726)	(contig_1 - 139550:140755)	0	0	0	(contig_8 - 3429:3749)	0	0	0	0	0	0	0	0	0	0	0	0	0	0	0	0	0	0
572		H2-20-0491-1	1708	survived	no MRSA	0	0	0	0	0	0	0	0	0	0	0	0	0	0	0	0	0	0	0	0	0	0	0	0	0	(contig_5 - 146854:147174)	0	0	0	0	0	0	0	0	0	0	0	0	0	0	0	0	0	0
573		H2-17-0182-1	1708	died	no MRSA	0	0	(contig_17 - 50717:50809)	(contig_2 - 296903:297634)	0	0	0	0	0	0	0	0	0	0	0	0	0	0	0	0	(contig_8 - 126617:126688)	(contig_2 - 294525:295730)	0	0	0	(contig_5 - 146855:147175)	0	0	0	0	0	0	0	0	0	0	0	0	0	0	0	0	0	0
574		H1-18-0113-1	-	survived	no MRSA	0	0	(contig_6 - 135700:135792)	0	0	0	0	0	0	0	0	0	0	0	0	0	0	0	0	0	0	0	0	0	0	0	0	0	0	0	0	0	0	0	0	0	0	0	0	0	0	0	0	0
575		H2-17-0615-1	34	died	no MRSA	0	0	(contig_22 - 6691:6783)	0	0	0	0	0	0	0	0	0	0	0	0	0	0	0	0	0	0	0	0	0	0	(contig_25 - 8738:9058)	0	0	0	0	0	0	0	0	0	0	0	0	0	0	0	0	0	0
576		H5-18-0374-1	34	died	no MRSA	0	0	0	0	0	0	0	0	0	0	0	0	0	0	0	0	0	0	0	0	0	0	0	0	0	0	0	0	0	0	0	0	0	0	0	0	0	0	0	0	0	0	0	0
577		H2-19-0715-1	34	survived	no MRSA	0	0	0	0	0	0	0	0	0	0	0	0	0	0	0	0	0	0	0	0	0	0	0	0	0	(contig_35 - 3429:3749)	0	0	0	0	0	0	0	0	0	0	0	0	0	0	0	0	0	0
578		H1-18-0354-1	34	survived	no MRSA	0	0	0	0	0	0	0	0	0	0	0	0	0	0	0	0	0	0	0	0	(contig_1 - 278237:278308)	(contig_1 - 264277:265482)	0	0	0	(contig_5 - 3429:3749)	0	0	0	0	0	0	0	0	0	0	0	0	0	0	0	0	0	0
579		H2-18-0650-1	34	survived	no MRSA	0	0	0	0	0	0	0	0	0	0	0	0	0	0	0	0	0	0	0	0	(contig_11 - 76210:76281)	(contig_2 - 296046:297251)	0	0	0	(contig_4 - 3429:3749)	0	0	0	0	0	0	0	0	0	0	0	0	0	0	0	0	0	0
580		H1-17-0486-1	30 (CC30)	survived	no MRSA	0	0	0	0	0	0	0	0	0	0	0	0	0	0	0	0	0	0	0	0	0	0	0	0	0	(contig_6 - 3427:3747)	0	0	0	0	0	0	0	0	0	0	0	0	0	0	0	0	0	0
581		H3-17-0348-1	30 (CC30)	survived	no MRSA	0	0	0	0	0	0	0	0	0	0	0	0	0	0	0	0	0	0	0	0	0	0	0	0	0	0	0	0	0	0	0	0	0	0	0	0	0	0	0	0	0	0	0	0
582		H1-18-0287-1	39	survived	no MRSA	0	0	0	0	0	0	0	0	0	0	0	0	0	0	0	0	0	(contig_17 - 11065:11406)	0	0	0	0	0	0	0	(contig_17 - 22247:22567)	0	0	0	0	0	0	0	0	0	0	0	0	0	0	0	0	0	0
583		H2-18-0609-1	30 (CC30)	survived	no MRSA	0	0	0	0	0	0	0	0	0	0	0	0	0	0	0	0	0	0	0	0	0	0	0	0	0	0	0	0	0	0	0	0	0	0	0	0	0	0	0	0	0	0	0	0
584		H5-18-0240-1	30 (CC30)	survived	no MRSA	0	0	0	0	0	0	0	0	0	0	0	0	0	0	0	0	0	(contig_7 - 67999:68340)	0	0	0	0	0	0	0	0	0	0	0	0	0	0	0	0	0	0	0	0	0	0	0	0	0	0
585		H2-17-0227-1	4805	died	no MRSA	0	0	0	0	0	0	0	0	0	0	0	0	0	0	0	0	0	(contig_12 - 17813:18154)	0	0	(contig_10 - 123:194)	0	0	0	0	(contig_12 - 28995:29315)	0	0	0	0	0	0	0	0	0	0	0	0	0	0	0	0	0	0
586		H5-19-0365-1	30 (CC30)	died	no MRSA	0	0	0	0	0	0	0	0	0	0	0	0	0	0	0	0	0	0	0	0	0	0	0	0	0	(contig_1 - 146903:147223)	0	0	0	0	0	0	0	0	0	0	0	0	0	0	0	0	0	0
587		H5-20-0163-1	30 (CC30)	survived	no MRSA	0	0	0	0	0	0	0	0	0	0	0	0	0	0	0	0	0	0	0	0	(contig_3 - 119356:119427)	0	0	0	0	(contig_16 - 42736:43056)	0	0	0	0	0	0	0	0	0	0	0	0	0	0	0	0	0	0
588		H5-18-0111-1	30 (CC30)	survived	no MRSA	0	0	0	0	0	0	0	0	0	0	0	0	0	0	0	0	0	0	0	0	(contig_8 - 126620:126691)	0	0	0	0	0	0	0	0	0	0	0	0	0	0	0	0	0	0	0	0	0	0	0
589		H5-18-0397-1	30 (CC30)	survived	no MRSA	0	0	0	0	0	0	0	0	0	0	0	0	0	0	0	0	0	0	0	0	0	0	0	0	0	(contig_5 - 146919:147239)	0	0	0	0	0	0	0	0	0	0	0	0	0	0	0	0	0	0
590		H4-18-0258-1	-	survived	no MRSA	0	0	0	0	0	0	0	0	0	0	0	0	0	0	0	0	0	0	0	0	0	0	0	0	0	(contig_6 - 3581:3901)	0	0	0	0	0	0	0	0	0	0	0	0	0	0	0	0	0	0
591		H5-18-0322-1	30 (CC30)	survived	no MRSA	0	0	0	(contig_2 - 160032:160763)	0	0	0	0	0	0	0	0	0	0	0	0	0	0	0	0	(contig_2 - 171549:171620)	(contig_2 - 157654:158859)	0	0	0	(contig_26 - 3429:3749)	0	0	0	0	0	0	0	0	0	0	0	0	0	0	0	0	0	0
592		H4-17-0275-1	30 (CC30)	survived	no MRSA	0	0	0	0	0	0	0	0	0	0	0	0	0	0	0	0	0	0	0	0	0	0	0	0	0	(contig_24 - 3429:3749)	0	0	0	0	0	0	0	0	0	0	0	0	0	0	0	0	0	0
593		H5-20-0358-1	30 (CC30)	survived	no MRSA	0	0	0	0	0	0	0	0	0	0	0	0	0	0	0	0	0	0	0	0	(contig_8 - 11136:11207)	(contig_2 - 902:2107)	0	0	0	(contig_4 - 146854:147174)	0	0	0	0	0	0	0	0	0	0	0	0	0	0	0	0	0	0
594		H4-18-0335-1	30 (CC30)	died	no MRSA	0	0	0	0	0	0	0	0	0	0	0	0	0	0	0	0	0	0	0	0	0	0	0	0	0	(contig_6 - 3429:3749)	0	0	0	0	0	0	0	0	0	0	0	0	0	0	0	0	0	0
595		H4-18-0025-1	30 (CC30)	died	no MRSA	0	0	0	0	0	0	0	0	0	0	0	0	0	0	0	0	0	0	0	0	(contig_1 - 276943:277014)	(contig_1 - 262914:264119)	0	0	0	(contig_6 - 146856:147176)	0	0	0	0	0	0	0	0	0	0	0	0	0	0	0	0	0	0
596		H2-20-0236-1	30 (CC30)	survived	no MRSA	0	0	0	0	0	0	0	0	0	0	0	0	0	0	0	0	0	0	0	0	0	0	0	0	0	(contig_7 - 3428:3748)	0	0	0	0	0	0	0	0	0	0	0	0	0	0	0	0	0	0
597		H5-18-0319-1	30 (CC30)	died	no MRSA	0	0	(contig_9 - 12273:12365)	0	0	0	0	0	0	0	0	0	0	0	0	0	0	0	0	0	0	0	0	0	0	(contig_30 - 3430:3750)	0	0	0	0	0	0	0	0	0	0	0	0	0	0	0	0	0	0
598		H4-18-0370-1	30 (CC30)	died	no MRSA	0	0	0	0	0	0	0	0	0	0	0	0	0	0	0	0	0	0	0	0	0	0	0	0	0	(contig_5 - 3429:3749)	0	0	0	0	0	0	0	0	0	0	0	0	0	0	0	0	0	0
599		H2-20-0001-1	30 (CC30)	survived	no MRSA	0	0	0	0	0	0	0	0	0	0	0	0	0	0	0	0	0	0	0	0	0	0	0	0	0	(contig_5 - 3429:3749)	0	0	0	0	0	0	0	0	0	0	0	0	0	0	0	0	0	0
600		H2-17-0343-1	-	survived	no MRSA	0	0	0	0	0	0	0	0	0	0	0	0	0	0	0	0	0	0	0	0	0	0	0	0	0	(contig_5 - 146918:147238)	0	0	0	0	0	0	0	0	0	0	0	0	0	0	0	0	0	0
601		H2-17-0211-1	30 (CC30)	survived	no MRSA	0	0	0	0	0	0	0	0	0	0	0	0	0	0	0	0	0	0	0	0	0	0	0	0	0	(contig_8 - 133587:133907)	0	0	0	0	0	0	0	0	0	0	0	0	0	0	0	0	0	0
602		H2-19-0049-1	30 (CC30)	died	no MRSA	0	0	0	0	0	0	0	0	0	0	0	0	0	0	0	0	0	0	0	0	(contig_2 - 256905:256976)	(contig_2 - 242876:244081)	0	0	0	(contig_52 - 488:808)	0	0	0	0	0	0	0	0	0	0	0	0	0	0	0	0	0	0
603		H4-18-0372-1	30 (CC30)	survived	no MRSA	0	0	0	0	0	0	0	0	0	0	0	0	0	0	0	0	0	0	0	0	0	0	0	0	0	(contig_5 - 146750:147070)	0	0	0	0	0	0	0	0	0	0	0	0	0	0	0	0	0	0
604		H2-17-0303-1	30 (CC30)	survived	no MRSA	0	0	0	0	0	0	0	0	0	0	0	0	0	0	0	0	0	0	0	0	0	0	0	0	0	(contig_5 - 3429:3749)	0	0	0	0	0	0	0	0	0	0	0	0	0	0	0	0	0	0
605		H2-20-0631-1	30 (CC30)	died	no MRSA	0	0	0	0	0	0	0	0	0	0	0	0	0	0	0	0	0	0	0	0	0	0	0	0	0	(contig_27 - 3429:3749)	0	0	0	0	0	0	0	0	0	0	0	0	0	0	0	0	0	0
606		H2-20-0404-1	30 (CC30)	survived	no MRSA	0	0	0	0	0	0	0	0	0	0	0	0	0	0	0	0	0	0	0	0	0	0	0	0	0	(contig_6 - 3429:3749)	0	0	0	0	0	0	0	0	0	0	0	0	0	0	0	0	0	0
607		H2-20-0415-1	30 (CC30)	survived	no MRSA	0	0	0	0	0	0	0	0	0	0	0	0	0	0	0	0	0	0	0	0	(contig_1 - 126614:126685)	(contig_1 - 139509:140714)	0	0	0	(contig_5 - 146918:147238)	0	0	0	0	0	0	0	0	0	0	0	0	0	0	0	0	0	0
608		H2-18-0724-1	30 (CC30)	survived	no MRSA	0	0	0	0	0	0	0	0	0	0	0	0	0	0	0	0	0	0	0	0	(contig_27 - 27101:27172)	(contig_5 - 157548:158753)	0	0	0	(contig_6 - 3429:3749)	0	0	0	0	0	0	0	0	0	0	0	0	0	0	0	0	0	0
609		H5-20-0076-1	30 (CC30)	survived	MRSA	0	0	0	0	0	0	0	0	0	0	0	0	0	0	0	0	0	0	0	0	0	0	0	0	0	(contig_7 - 146918:147238)	0	0	0	0	0	0	0	0	0	0	0	0	0	0	0	0	0	0
610		H1-18-0437-1	30 (CC30)	survived	no MRSA	0	0	0	0	0	0	0	0	0	0	0	0	0	0	0	0	0	0	0	0	0	0	0	0	0	(contig_5 - 3428:3748)	0	0	0	0	0	0	0	0	0	0	0	0	0	0	0	0	0	0
611		H4-17-0134-1	30 (CC30)	survived	no MRSA	0	0	0	0	0	0	0	0	0	0	0	0	0	0	0	0	0	0	0	0	(contig_2 - 126232:126303)	(contig_2 - 139629:140834)	0	0	0	(contig_7 - 3429:3749)	0	0	0	0	0	0	0	0	0	0	0	0	0	0	0	0	0	0
612		H2-18-0220-1	30 (CC30)	survived	no MRSA	0	0	0	0	0	0	0	0	0	0	0	0	0	0	0	0	0	0	0	0	(contig_2 - 171568:171639)	(contig_2 - 157543:158748)	0	0	0	(contig_6 - 146919:147239)	0	0	0	0	0	0	0	0	0	0	0	0	0	0	0	0	0	0
613		H2-18-0124-1	30 (CC30)	died	no MRSA	(contig_2 - 97800:98102)	0	0	0	0	0	0	0	0	0	0	0	0	0	0	0	0	0	0	0	(contig_2 - 125649:125720)	(contig_2 - 139442:140647)	0	0	0	(contig_6 - 146919:147239)	0	0	0	0	0	0	0	0	0	0	0	0	0	0	0	0	0	0
614		H4-17-0216-1	30 (CC30)	survived	no MRSA	0	0	0	0	0	0	0	0	0	0	0	0	0	0	0	0	0	0	0	0	(contig_1 - 405640:405711)	0	0	0	0	(contig_5 - 3429:3749)	0	0	0	0	0	0	0	0	0	0	0	0	0	0	0	0	0	0
615		H4-17-0192-1	30 (CC30)	survived	MRSA	0	0	0	(contig_10 - 99872:100603)	0	0	0	0	0	0	0	0	0	0	0	0	0	0	0	0	(contig_8 - 127084:127155)	0	0	0	0	(contig_4 - 3429:3749)	0	0	0	0	0	0	0	0	0	0	0	0	0	0	0	0	0	0
616		H5-20-0228-1	30 (CC30)	survived	no MRSA	0	0	0	0	0	0	0	0	0	0	0	0	0	0	0	0	0	0	0	0	(contig_4 - 27519:27590)	0	0	0	0	(contig_6 - 3427:3747)	0	0	0	0	0	0	0	0	0	0	0	0	0	0	0	0	0	0
617		H2-18-0083-1	30 (CC30)	died	no MRSA	0	0	0	0	0	0	0	0	0	0	0	0	0	0	0	0	0	0	0	0	0	(contig_1 - 126153:127358)	0	0	0	(contig_4 - 3429:3749)	0	0	0	0	0	0	0	0	0	0	0	0	0	0	0	0	0	0
618		H5-17-0296-1	30 (CC30)	died	no MRSA	0	0	0	(contig_2 - 9332:10063)	0	0	0	0	0	0	0	0	0	0	0	0	0	0	0	0	(contig_7 - 99:170)	(contig_2 - 11234:12439)	0	0	0	(contig_6 - 146841:147161)	0	0	0	0	0	0	0	0	0	0	0	0	0	0	0	0	0	0
619		H2-18-0348-1	30 (CC30)	died	no MRSA	0	0	0	0	0	0	0	0	0	0	0	0	0	0	0	0	0	0	0	0	0	0	0	0	0	0	0	0	0	0	0	0	0	0	0	0	0	0	0	0	0	0	0	0
620		H2-17-0373-1	30 (CC30)	survived	no MRSA	0	0	0	0	0	0	0	0	0	0	0	0	0	0	0	0	0	0	0	0	0	0	0	0	0	(contig_6 - 3429:3749)	0	0	0	0	0	0	0	0	0	0	0	0	0	0	0	0	0	0
621		H5-20-0229-1	30 (CC30)	survived	no MRSA	0	0	0	0	0	0	0	0	0	0	0	0	0	0	0	0	0	0	0	0	0	0	0	0	0	(contig_41 - 528:848)	0	0	0	0	0	0	0	0	0	0	0	0	0	0	0	0	0	0
622		H5-17-0253-1	30 (CC30)	survived	no MRSA	(contig_3 - 27743:28045)	0	0	0	0	0	0	0	0	0	0	0	0	0	0	0	0	0	0	0	0	0	0	0	0	(contig_5 - 3426:3746)	0	0	0	0	0	0	0	0	0	0	0	0	0	0	0	0	0	0
623		H2-18-0452-1	30 (CC30)	died	no MRSA	0	0	0	0	0	0	0	0	0	0	0	0	0	0	0	0	0	0	0	0	0	(contig_1 - 9331:10536)	0	0	0	(contig_7 - 146856:147176)	0	0	0	0	0	0	0	0	0	0	0	0	0	0	0	0	0	0
624		H2-17-0394-1	30 (CC30)	survived	no MRSA	0	0	0	0	0	0	0	0	0	0	0	0	0	0	0	0	0	0	0	0	0	(contig_1 - 30294:31499)	0	0	0	0	0	0	0	0	0	0	0	0	0	0	0	0	0	0	0	0	0	0
625		H5-17-0277-1	30 (CC30)	survived	no MRSA	0	0	0	0	0	0	0	0	0	0	0	0	0	0	0	0	0	0	0	0	(contig_1 - 126845:126916)	(contig_1 - 139740:140945)	0	0	0	(contig_6 - 146852:147172)	0	0	0	0	0	0	0	0	0	0	0	0	0	0	0	0	0	0
626		H2-17-0473-1	30 (CC30)	survived	no MRSA	0	0	0	0	0	0	0	0	0	0	0	0	0	0	0	0	0	0	0	0	0	0	0	0	0	(contig_6 - 3429:3749)	0	0	0	0	0	0	0	0	0	0	0	0	0	0	0	0	0	0
627		H5-20-0260-1	30 (CC30)	died	no MRSA	0	0	0	0	0	0	0	0	0	0	0	0	0	0	0	0	0	0	0	0	0	0	0	0	0	(contig_5 - 146919:147239)	0	0	0	0	0	0	0	0	0	0	0	0	0	0	0	0	0	0
628		H2-18-0479-1	30 (CC30)	survived	no MRSA	0	0	0	0	0	0	0	0	0	0	0	0	0	0	0	0	0	0	0	0	(contig_9 - 26:97)	(contig_33 - 1181:2386)	0	0	0	(contig_7 - 3429:3749)	0	0	0	0	0	0	0	0	0	0	0	0	0	0	0	0	0	0
629		H5-20-0200-1	30 (CC30)	died	no MRSA	0	0	0	0	0	0	0	0	0	0	0	0	0	0	0	0	0	0	0	0	(contig_7 - 126270:126341)	(contig_26 - 11049:12254)	0	0	0	(contig_9 - 3429:3749)	0	0	0	0	0	0	0	0	0	0	0	0	0	0	0	0	0	0
630		H5-18-0291-1	30 (CC30)	survived	no MRSA	0	0	0	0	0	0	0	0	0	0	0	0	0	0	0	0	0	0	0	0	0	0	0	0	0	(contig_5 - 3429:3749)	0	0	0	0	0	0	0	0	0	0	0	0	0	0	0	0	0	0
631		H2-18-0247-1	30 (CC30)	survived	no MRSA	0	0	0	0	0	0	0	0	0	0	0	0	0	0	0	0	0	0	0	0	0	(contig_5 - 23350:24555)	0	0	0	0	0	0	0	0	0	0	0	0	0	0	0	0	0	0	0	0	0	0
632		H2-17-0416-1	30 (CC30)	survived	no MRSA	0	0	0	0	0	0	0	0	0	0	0	0	0	0	0	0	0	0	0	0	0	0	0	0	0	0	0	0	0	0	0	0	0	0	0	0	0	0	0	0	0	0	0	0
633		H5-19-0376-1	30 (CC30)	survived	no MRSA	0	0	0	0	0	0	0	0	0	0	0	0	0	0	0	0	0	0	0	0	(contig_5 - 37379:37450)	0	0	0	0	(contig_6 - 146981:147301)	0	0	0	0	0	0	0	0	0	0	0	0	0	0	0	0	0	0
634		H3-17-0337-1	30 (CC30)	died	no MRSA	0	0	0	0	0	0	0	0	0	0	0	0	0	0	0	0	0	0	0	0	0	0	0	0	0	(contig_7 - 146919:147239)	0	0	0	0	0	0	0	0	0	0	0	0	0	0	0	0	0	0
635		H2-20-0307-1	30 (CC30)	survived	no MRSA	0	0	0	0	0	0	0	0	0	0	0	0	0	0	0	0	0	0	0	0	0	0	0	0	0	(contig_6 - 146918:147238)	0	0	0	0	0	0	0	0	0	0	0	0	0	0	0	0	0	0
636		H2-18-0488-1	30 (CC30)	died	no MRSA	0	0	0	0	0	0	0	0	0	0	0	0	0	0	0	0	0	0	0	0	(contig_1 - 406070:406141)	(contig_1 - 392042:393247)	0	0	0	(contig_6 - 3429:3749)	0	0	0	0	0	0	0	0	0	0	0	0	0	0	0	0	0	0
637		H5-20-0253-1	30 (CC30)	survived	no MRSA	0	0	0	0	0	0	0	0	0	0	0	0	0	0	0	0	0	0	0	0	(contig_1 - 127978:128049)	(contig_1 - 140873:142078)	0	0	0	(contig_39 - 959:1279)	0	0	0	0	0	0	0	0	0	0	0	0	0	0	0	0	0	0
638		H4-17-0425-1	30 (CC30)	died	no MRSA	0	0	0	0	0	0	0	0	0	0	0	0	0	0	0	0	0	0	0	0	0	0	0	0	0	(contig_30 - 3429:3749)	0	0	0	0	0	0	0	0	0	0	0	0	0	0	0	0	0	0
639		H5-17-0121-1	30 (CC30)	survived	no MRSA	0	0	0	0	0	0	0	0	0	0	0	0	0	0	0	0	0	0	0	0	(contig_10 - 126514:126585)	(contig_6 - 61:1266)	0	0	0	(contig_29 - 3429:3749)	0	0	0	0	0	0	0	0	0	0	0	0	0	0	0	0	0	0
640		H5-20-0309-1	30 (CC30)	survived	no MRSA	0	0	0	0	0	0	0	0	0	0	0	0	0	0	0	0	0	0	0	0	(contig_22 - 37380:37451)	(contig_22 - 23351:24556)	0	0	0	(contig_5 - 3429:3749)	0	0	0	0	0	0	0	0	0	0	0	0	0	0	0	0	0	0
641		H2-18-0198-1	-	survived	no MRSA	0	0	0	0	0	0	0	0	0	0	0	0	0	0	0	0	0	0	0	0	0	(contig_2 - 391827:393032)	0	0	0	(contig_45 - 402:722)	0	0	0	0	0	0	0	0	0	0	0	0	0	0	0	0	0	0
642		H2-20-0599-1	30 (CC30)	died	no MRSA	0	0	0	0	0	0	0	0	0	0	0	0	0	0	0	0	0	0	0	0	(contig_9 - 126646:126717)	(contig_25 - 127:1332)	0	0	0	(contig_31 - 8737:9057)	0	0	0	0	0	0	0	0	0	0	0	0	0	0	0	0	0	0
643		H2-20-0287-1	30 (CC30)	survived	no MRSA	0	0	0	0	0	0	0	0	0	0	0	0	0	0	0	0	0	0	0	0	(contig_11 - 80580:80651)	(contig_1 - 11147:12352)	0	0	0	(contig_6 - 146920:147240)	0	0	0	0	0	0	0	0	0	0	0	0	0	0	0	0	0	0
[truncated: 33 more columns]
